# Supplementary material for: Exploring differential gene expression and biomarker potential in systemic lupus erythematosus: a retrospective study
Source: PeerJ journal article supplement (doi:10.7717/peerj.19891), 2025-09-08

# **Exploring differential gene expression and biomarker potential in systemic lupus erythematosus**

## **Supplementary Figure**

Jie Xiao<sup>#1</sup>, Yuhong Luo<sup>#1</sup>, Lina Duan<sup>#1</sup>, Xinru Mao<sup>1</sup>, Lingyue Jin<sup>1</sup>, Haifang Wang<sup>1</sup>, Hongxia Wang<sup>1</sup>, Jie Pan<sup>1</sup>, Ying Gong<sup>\*1, 2</sup> and Haixia Li<sup>\*1</sup>

<sup>#</sup>Jie Xiao, Yuhong Luo and Lina Duan contributed equally to this work.

<sup>1</sup>Department of Laboratory Medicine, Guangdong Provincial Key Laboratory of Precision Medical Diagnostics, Guangdong Engineering and Technology Research Center for Rapid Diagnostic Biosensors, Guangdong Provincial Key Laboratory of Single-cell and Extracellular Vesicles, Nanfang Hospital, Southern Medical University, Guangzhou, 510515, P. R. China.

<sup>2</sup> Department of Internal Medicine, Division of Hematology, Maastricht University Medical Center+, Maastricht, the Netherlands

Supplement Figure 1

Bubble plots of GO and KEGG pathway enrichment analysis results.

(A) The bubble plot shows the top 5 processes enriched in EP-DEGs in BPs, CCs, and MFs. (B) The bubble plot visualizes the top 5 significantly enriched KEGG pathways in DEGs (co-DEGs). The size of the ball represents the number of genes, and the color change of the ball corresponds to different *p*-values.

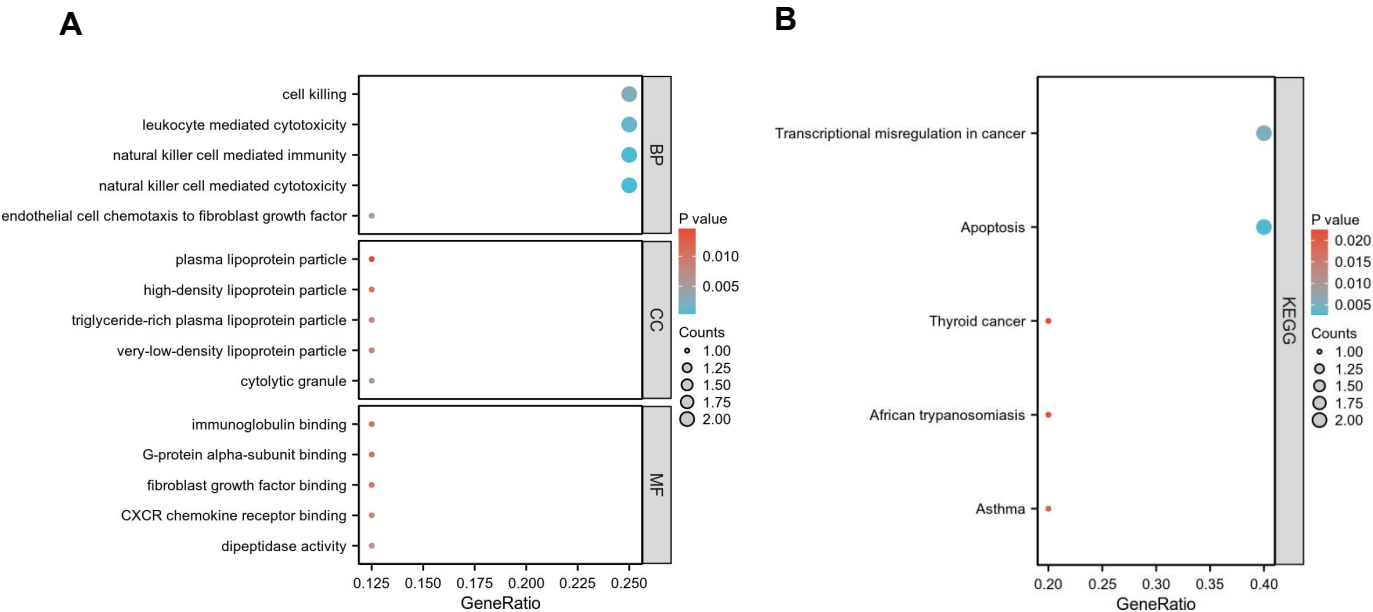

## Supplement Figure 2

Construction of a Protein-protein interaction (PPI) network.

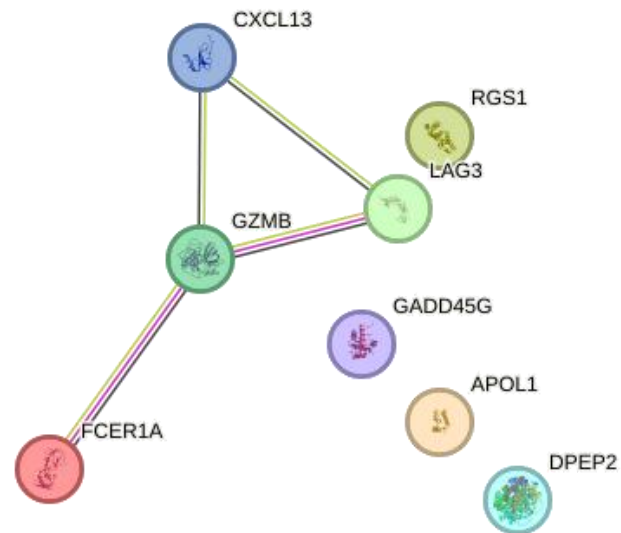

### Supplement Figure 3

#### Gene validation in GSE10325 and GSE13887 datasets.

(A-G) Volcano plots of hub genes expressed in GSE10325 and GSE13887 datasets.

(H) Volcano plot of *FCER1A* and *RGS1*, genes with consistent expression levels in GSE10325 and GSE13887.

**A**

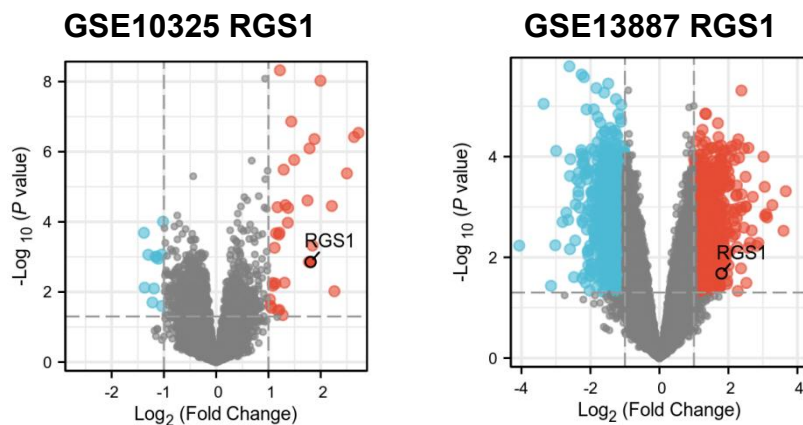

**B**

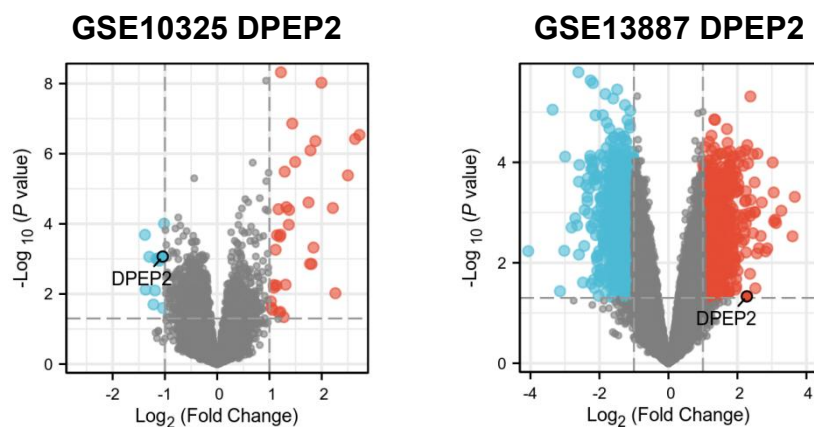

**C**

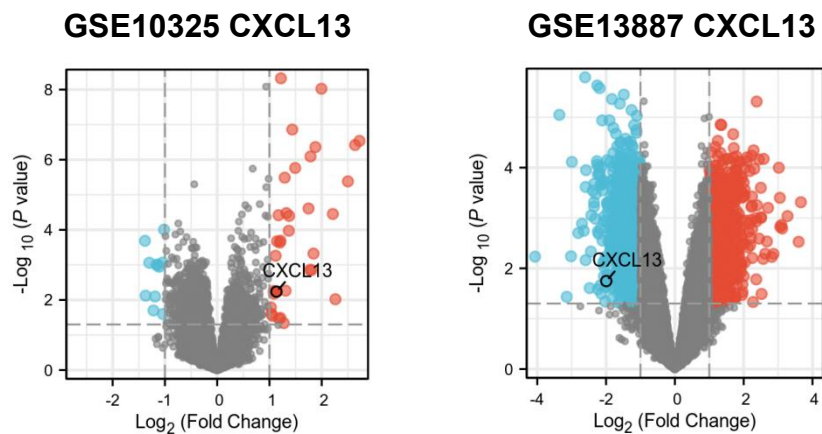

**D**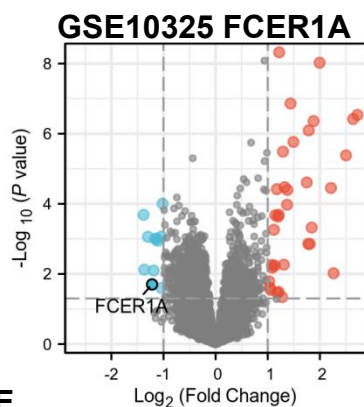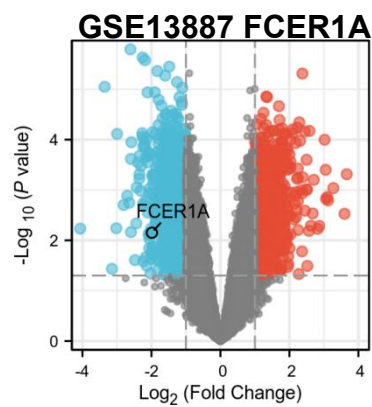**E**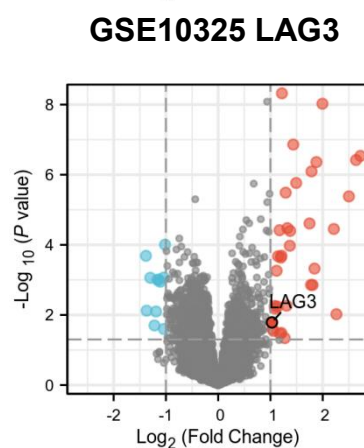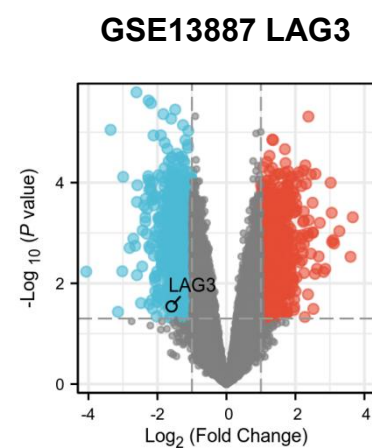**F**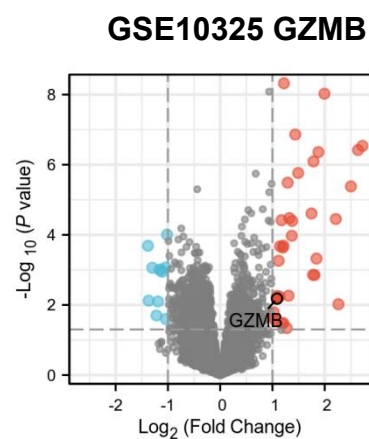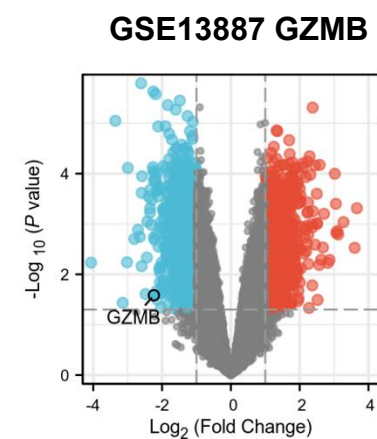**G**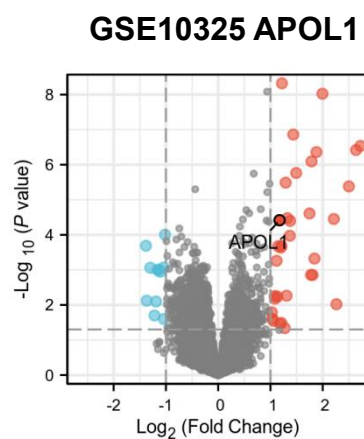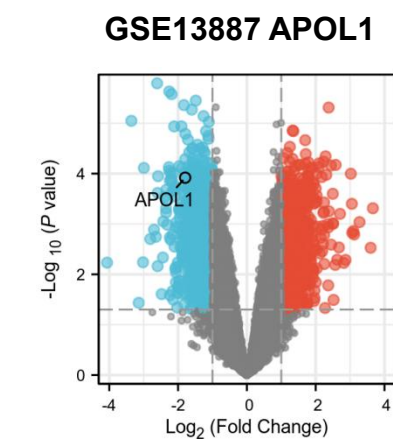

**H**

**GSE10325**

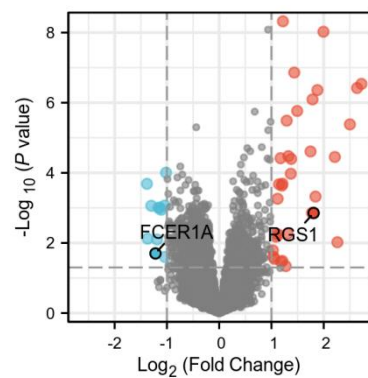

**GSE13887**

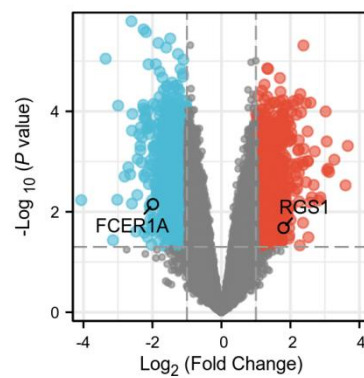

## Supplement Figure 4

### Construction of the FCER1A and RGS1 PPI network.

**A**

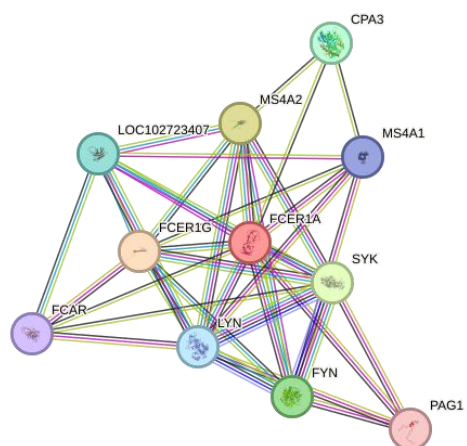

**B**

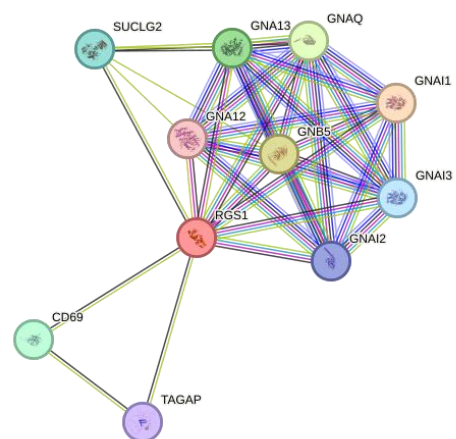

Supplement: Supplementary_Figure.pdf [file Supplementary_Figure.pdf]
