# Supplementary material for: Exploring differential gene expression and biomarker potential in systemic lupus erythematosus: a retrospective study
Source: PeerJ journal article supplement (doi:10.7717/peerj.19891), 2025-09-08
Supplement: qPCR.zip [file qPCR.zip]

# cobas® 4800 User Defined Workflow (UDF)

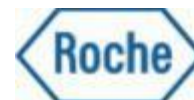

20241212 xjplate1

## Experiment

|               |                       |                    |                                    |
|---------------|-----------------------|--------------------|------------------------------------|
| Creation Date | 12/12/2024 8:31:42 PM | Last Modified Date | 12/12/2024 9:36:26 PM              |
| Operator      | System Admin          | Owner              | System Admin                       |
| Start Time    | 12/12/2024 8:32:29 PM | End Time           | 12/12/2024 9:31:24 PM              |
| Run State     | Completed             | Software Version   | LCS480 1.5.1.62 SP3 - UDF 2.1.0.26 |
| Macro         |                       | Macro Owner        |                                    |
| Macro Status  |                       |                    |                                    |
| Templates     | gongying              | Plate ID           |                                    |
| Test ID       |                       | Lot ID             |                                    |
| Color Comp ID |                       |                    |                                    |
| Run Notes     |                       |                    |                                    |

## Programs

|              |         |               |      |
|--------------|---------|---------------|------|
| Program Name | Program |               |      |
| Cycles       | 1       | Analysis Mode | None |

| Target (°C) | Acquisition Mode | Hold (hh:mm:ss) | Ramp Rate (°C/s) | Acquisitions (per °C) | Sec Target (°C) | Step size (°C) | Step Delay (cycles) |
|-------------|------------------|-----------------|------------------|-----------------------|-----------------|----------------|---------------------|
| 95          | None             | 00:00:30        | 4.40             |                       | 0               | 0              | 0                   |

|              |         |               |                |
|--------------|---------|---------------|----------------|
| Program Name | Program |               |                |
| Cycles       | 40      | Analysis Mode | Quantification |

| Target (°C) | Acquisition Mode | Hold (hh:mm:ss) | Ramp Rate (°C/s) | Acquisitions (per °C) | Sec Target (°C) | Step size (°C) | Step Delay (cycles) |
|-------------|------------------|-----------------|------------------|-----------------------|-----------------|----------------|---------------------|
| 95          | None             | 00:00:15        | 4.40             |                       | 0               | 0              | 0                   |
| 60          | Single           | 00:00:30        | 2.20             |                       | 0               | 0              | 0                   |

|              |         |               |                |
|--------------|---------|---------------|----------------|
| Program Name | Program |               |                |
| Cycles       | 1       | Analysis Mode | Melting Curves |

| Target (°C) | Acquisition Mode | Hold (hh:mm:ss) | Ramp Rate (°C/s) | Acquisitions (per °C) | Sec Target (°C) | Step size (°C) | Step Delay (cycles) |
|-------------|------------------|-----------------|------------------|-----------------------|-----------------|----------------|---------------------|
| 95          | None             | 00:01:00        | 4.40             |                       | 0               | 0              | 0                   |
| 60          | None             | 00:00:30        | 2.20             |                       | 0               | 0              | 0                   |
| 90          | Continuous       |                 | 0.11             | 5                     | 0               | 0              | 0                   |

|              |         |               |      |
|--------------|---------|---------------|------|
| Program Name | Program |               |      |
| Cycles       | 1       | Analysis Mode | None |

| Target (°C) | Acquisition Mode | Hold (hh:mm:ss) | Ramp Rate (°C/s) | Acquisitions (per °C) | Sec Target (°C) | Step size (°C) | Step Delay (cycles) |
|-------------|------------------|-----------------|------------------|-----------------------|-----------------|----------------|---------------------|
|-------------|------------------|-----------------|------------------|-----------------------|-----------------|----------------|---------------------|

| Target (°C) | Acquisition Mode | Hold (hh:mm:ss) | Ramp Rate (°C/s) | Acquisitions (per °C) | Sec Target (°C) | Step size (°C) | Step Delay (cycles) |
|-------------|------------------|-----------------|------------------|-----------------------|-----------------|----------------|---------------------|
| 40          | None             | 00:00:30        | 2.20             |                       | 0               | 0              | 0                   |

## Samples

| Sample Count | 96          |    |          |              |  |
|--------------|-------------|----|----------|--------------|--|
| Subset       | All Samples |    |          |              |  |
| Pos          | Name        | ID | Repl. Of | Sample Notes |  |
| A1           | GAPDH 1     |    |          |              |  |
| A2           | GAPDH 1     |    |          |              |  |
| A3           | GAPDH 1     |    |          |              |  |
| A4           | GAPDH 2     |    |          |              |  |
| A5           | GAPDH 2     |    |          |              |  |
| A6           | GAPDH 2     |    |          |              |  |
| A7           | GAPDH 3     |    |          |              |  |
| A8           | GAPDH 3     |    |          |              |  |
| A9           | GAPDH 3     |    |          |              |  |
| A10          | GAPDH 4     |    |          |              |  |
| A11          | GAPDH 4     |    |          |              |  |
| A12          | GAPDH 4     |    |          |              |  |
| B1           | FCER1A 1    |    |          |              |  |
| B2           | FCER1A 1    |    |          |              |  |
| B3           | FCER1A 1    |    |          |              |  |
| B4           | FCER1A 2    |    |          |              |  |
| B5           | FCER1A 2    |    |          |              |  |
| B6           | FCER1A 2    |    |          |              |  |
| B7           | FCER1A 3    |    |          |              |  |
| B8           | FCER1A 3    |    |          |              |  |
| B9           | FCER1A 3    |    |          |              |  |
| B10          | FCER1A 4    |    |          |              |  |
| B11          | FCER1A 4    |    |          |              |  |
| B12          | FCER1A 4    |    |          |              |  |
| C1           | RGS1 1      |    |          |              |  |
| C2           | RGS1 1      |    |          |              |  |
| C3           | RGS1 1      |    |          |              |  |
| C4           | RGS1 2      |    |          |              |  |
| C5           | RGS1 2      |    |          |              |  |
| C6           | RGS1 2      |    |          |              |  |
| C7           | RGS1 3      |    |          |              |  |
| C8           | RGS1 3      |    |          |              |  |
| C9           | RGS1 3      |    |          |              |  |
| C10          | RGS1 4      |    |          |              |  |
| C11          | RGS1 4      |    |          |              |  |
| C12          | RGS1 4      |    |          |              |  |

## Samples

| Sample Count | 96          |    |          |              |
|--------------|-------------|----|----------|--------------|
| Subset       | All Samples |    |          |              |
| Pos          | Name        | ID | Repl. Of | Sample Notes |
| D1           | GAPDH 5     |    |          |              |
| D2           | GAPDH 5     |    |          |              |
| D3           | GAPDH 5     |    |          |              |
| D4           | GAPDH 7     |    |          |              |
| D5           | GAPDH 7     |    |          |              |
| D6           | GAPDH 7     |    |          |              |
| D7           | GAPDH 11    |    |          |              |
| D8           | GAPDH 11    |    |          |              |
| D9           | GAPDH 11    |    |          |              |
| D10          | GAPDH 14    |    |          |              |
| D11          | GAPDH 14    |    |          |              |
| D12          | GAPDH 14    |    |          |              |
| E1           | FCER1A 5    |    |          |              |
| E2           | FCER1A 5    |    |          |              |
| E3           | FCER1A 5    |    |          |              |
| E4           | FCER1A 7    |    |          |              |
| E5           | FCER1A 7    |    |          |              |
| E6           | FCER1A 7    |    |          |              |
| E7           | FCER1A 11   |    |          |              |
| E8           | FCER1A 11   |    |          |              |
| E9           | FCER1A 11   |    |          |              |
| E10          | FCER1A 14   |    |          |              |
| E11          | FCER1A 14   |    |          |              |
| E12          | FCER1A 14   |    |          |              |
| F1           | RGS1 5      |    |          |              |
| F2           | RGS1 5      |    |          |              |
| F3           | RGS1 5      |    |          |              |
| F4           | RGS1 7      |    |          |              |
| F5           | RGS1 7      |    |          |              |
| F6           | RGS1 7      |    |          |              |
| F7           | RGS1 11     |    |          |              |
| F8           | RGS1 11     |    |          |              |
| F9           | RGS1 11     |    |          |              |
| F10          | RGS1 14     |    |          |              |
| F11          | RGS1 14     |    |          |              |
| F12          | RGS1 14     |    |          |              |
| G1           |             |    |          |              |
| G2           |             |    |          |              |
| G3           |             |    |          |              |

Samples

|              |             |    |          |              |  |
|--------------|-------------|----|----------|--------------|--|
| Sample Count | 96          |    |          |              |  |
| Subset       | All Samples |    |          |              |  |
| Pos          | Name        | ID | Repl. Of | Sample Notes |  |
| G4           |             |    |          |              |  |
| G5           |             |    |          |              |  |
| G6           |             |    |          |              |  |
| G7           |             |    |          |              |  |
| G8           |             |    |          |              |  |
| G9           |             |    |          |              |  |
| G10          |             |    |          |              |  |
| G11          |             |    |          |              |  |
| G12          |             |    |          |              |  |
| H1           |             |    |          |              |  |
| H2           |             |    |          |              |  |
| H3           |             |    |          |              |  |
| H4           |             |    |          |              |  |
| H5           |             |    |          |              |  |
| H6           |             |    |          |              |  |
| H7           |             |    |          |              |  |
| H8           |             |    |          |              |  |
| H9           |             |    |          |              |  |
| H10          |             |    |          |              |  |
| H11          |             |    |          |              |  |
| H12          |             |    |          |              |  |

Instrument

|      |      |               |       |
|------|------|---------------|-------|
| Name | Z480 | Serial Number | 56319 |
|------|------|---------------|-------|

Revision History

|          |      |      |        |
|----------|------|------|--------|
| Revision | Date | User | Reason |
|          |      |      |        |

Abs Quant/2nd Derivative Max for All Samples (Abs Quant/2nd Derivative Max)

Settings

|                    |                 |  |       |  |
|--------------------|-----------------|--|-------|--|
| Channel            | 465-510         |  |       |  |
| Color Compensation | Off             |  |       |  |
| Program            | Program         |  | Units |  |
| Mode               | High Confidence |  |       |  |

|             |             |
|-------------|-------------|
| Subset Name | All Samples |
|-------------|-------------|

Results

|         |    |     |       |      |    |               |          |        |
|---------|----|-----|-------|------|----|---------------|----------|--------|
| > -1.0e | CP | Pos | N(las | 5.0e | CP | Concentration | Standard | Status |
|---------|----|-----|-------|------|----|---------------|----------|--------|

## Results

| Inc                                 | Pos | Name     | Type    | CP    | Concentration | Standard | Status |
|-------------------------------------|-----|----------|---------|-------|---------------|----------|--------|
| <input checked="" type="checkbox"/> | A1  | GAPDH 1  | Unknown | 27.49 |               |          |        |
| <input checked="" type="checkbox"/> | A2  | GAPDH 1  | Unknown | 27.18 |               |          |        |
| <input checked="" type="checkbox"/> | A3  | GAPDH 1  | Unknown | 27.32 |               |          |        |
| <input checked="" type="checkbox"/> | A4  | GAPDH 2  | Unknown | 28.26 |               |          |        |
| <input checked="" type="checkbox"/> | A5  | GAPDH 2  | Unknown | 28.78 |               |          |        |
| <input checked="" type="checkbox"/> | A6  | GAPDH 2  | Unknown | 28.44 |               |          |        |
| <input checked="" type="checkbox"/> | A7  | GAPDH 3  | Unknown | 21.25 |               |          |        |
| <input checked="" type="checkbox"/> | A8  | GAPDH 3  | Unknown | 21.23 |               |          |        |
| <input checked="" type="checkbox"/> | A9  | GAPDH 3  | Unknown | 21.12 |               |          |        |
| <input checked="" type="checkbox"/> | A10 | GAPDH 4  | Unknown | 31.94 |               |          |        |
| <input checked="" type="checkbox"/> | A11 | GAPDH 4  | Unknown | 32.34 |               |          |        |
| <input checked="" type="checkbox"/> | A12 | GAPDH 4  | Unknown | 32.15 |               |          |        |
| <input checked="" type="checkbox"/> | B1  | FCER1A 1 | Unknown | 30.09 |               |          |        |
| <input checked="" type="checkbox"/> | B2  | FCER1A 1 | Unknown | 31.17 |               |          |        |
| <input checked="" type="checkbox"/> | B3  | FCER1A 1 | Unknown | 31.67 |               |          |        |
| <input checked="" type="checkbox"/> | B4  | FCER1A 2 | Unknown | 32.38 |               |          |        |
| <input checked="" type="checkbox"/> | B5  | FCER1A 2 | Unknown | 33.16 |               |          |        |
| <input checked="" type="checkbox"/> | B6  | FCER1A 2 | Unknown | 31.99 |               |          |        |
| <input checked="" type="checkbox"/> | B7  | FCER1A 3 | Unknown | 25.45 |               |          |        |
| <input checked="" type="checkbox"/> | B8  | FCER1A 3 | Unknown | 25.54 |               |          |        |
| <input checked="" type="checkbox"/> | B9  | FCER1A 3 | Unknown | 25.32 |               |          |        |
| <input checked="" type="checkbox"/> | B10 | FCER1A 4 | Unknown | 29.86 |               |          |        |
| <input checked="" type="checkbox"/> | B11 | FCER1A 4 | Unknown | 31.96 |               |          |        |
| <input checked="" type="checkbox"/> | B12 | FCER1A 4 | Unknown | 30.85 |               |          |        |
| <input checked="" type="checkbox"/> | C1  | RGS1 1   | Unknown | 35.00 |               |          | >      |
| <input checked="" type="checkbox"/> | C2  | RGS1 1   | Unknown | 34.28 |               |          |        |
| <input checked="" type="checkbox"/> | C3  | RGS1 1   | Unknown | 35.00 |               |          | >      |
| <input checked="" type="checkbox"/> | C4  | RGS1 2   | Unknown | 35.00 |               |          | >      |
| <input checked="" type="checkbox"/> | C5  | RGS1 2   | Unknown | 35.00 |               |          | >      |
| <input checked="" type="checkbox"/> | C6  | RGS1 2   | Unknown | 35.00 |               |          | >      |
| <input checked="" type="checkbox"/> | C7  | RGS1 3   | Unknown | 26.45 |               |          |        |
| <input checked="" type="checkbox"/> | C8  | RGS1 3   | Unknown | 26.48 |               |          |        |
| <input checked="" type="checkbox"/> | C9  | RGS1 3   | Unknown | 27.27 |               |          |        |
| <input checked="" type="checkbox"/> | C10 | RGS1 4   | Unknown | 35.00 |               |          | >      |
| <input checked="" type="checkbox"/> | C11 | RGS1 4   | Unknown |       |               |          |        |
| <input checked="" type="checkbox"/> | C12 | RGS1 4   | Unknown | 35.00 |               |          | >      |
| <input checked="" type="checkbox"/> | D1  | GAPDH 5  | Unknown | 24.44 |               |          |        |

> - Late Cp call (last five cycles) has higher uncertainty

## Results

| Inc                                 | Pos | Name      | Type    | CP    | Concentration | Standard | Status |
|-------------------------------------|-----|-----------|---------|-------|---------------|----------|--------|
| <input checked="" type="checkbox"/> | D2  | GAPDH 5   | Unknown | 24.50 |               |          |        |
| <input checked="" type="checkbox"/> | D3  | GAPDH 5   | Unknown | 24.51 |               |          |        |
| <input checked="" type="checkbox"/> | D4  | GAPDH 7   | Unknown | 22.87 |               |          |        |
| <input checked="" type="checkbox"/> | D5  | GAPDH 7   | Unknown | 22.83 |               |          |        |
| <input checked="" type="checkbox"/> | D6  | GAPDH 7   | Unknown | 22.79 |               |          |        |
| <input checked="" type="checkbox"/> | D7  | GAPDH 11  | Unknown | 29.43 |               |          |        |
| <input checked="" type="checkbox"/> | D8  | GAPDH 11  | Unknown | 29.73 |               |          |        |
| <input checked="" type="checkbox"/> | D9  | GAPDH 11  | Unknown | 29.22 |               |          |        |
| <input checked="" type="checkbox"/> | D10 | GAPDH 14  | Unknown | 20.68 |               |          |        |
| <input checked="" type="checkbox"/> | D11 | GAPDH 14  | Unknown | 20.64 |               |          |        |
| <input checked="" type="checkbox"/> | D12 | GAPDH 14  | Unknown | 20.67 |               |          |        |
| <input checked="" type="checkbox"/> | E1  | FCER1A 5  | Unknown | 29.94 |               |          |        |
| <input checked="" type="checkbox"/> | E2  | FCER1A 5  | Unknown | 29.68 |               |          |        |
| <input checked="" type="checkbox"/> | E3  | FCER1A 5  | Unknown | 29.28 |               |          |        |
| <input checked="" type="checkbox"/> | E4  | FCER1A 7  | Unknown | 28.35 |               |          |        |
| <input checked="" type="checkbox"/> | E5  | FCER1A 7  | Unknown | 27.90 |               |          |        |
| <input checked="" type="checkbox"/> | E6  | FCER1A 7  | Unknown | 28.04 |               |          |        |
| <input checked="" type="checkbox"/> | E7  | FCER1A 11 | Unknown | 31.14 |               |          |        |
| <input checked="" type="checkbox"/> | E8  | FCER1A 11 | Unknown | 30.93 |               |          |        |
| <input checked="" type="checkbox"/> | E9  | FCER1A 11 | Unknown | 30.88 |               |          |        |
| <input checked="" type="checkbox"/> | E10 | FCER1A 14 | Unknown | 28.65 |               |          |        |
| <input checked="" type="checkbox"/> | E11 | FCER1A 14 | Unknown | 28.78 |               |          |        |
| <input checked="" type="checkbox"/> | E12 | FCER1A 14 | Unknown | 28.62 |               |          |        |
| <input checked="" type="checkbox"/> | F1  | RGS1 5    | Unknown | 30.73 |               |          |        |
| <input checked="" type="checkbox"/> | F2  | RGS1 5    | Unknown | 30.63 |               |          |        |
| <input checked="" type="checkbox"/> | F3  | RGS1 5    | Unknown | 30.44 |               |          |        |
| <input checked="" type="checkbox"/> | F4  | RGS1 7    | Unknown | 28.91 |               |          |        |
| <input checked="" type="checkbox"/> | F5  | RGS1 7    | Unknown | 28.53 |               |          |        |
| <input checked="" type="checkbox"/> | F6  | RGS1 7    | Unknown | 28.72 |               |          |        |
| <input checked="" type="checkbox"/> | F7  | RGS1 11   | Unknown | 35.00 |               |          | >      |
| <input checked="" type="checkbox"/> | F8  | RGS1 11   | Unknown | 35.00 |               |          | >      |
| <input checked="" type="checkbox"/> | F9  | RGS1 11   | Unknown | 35.00 |               |          | >      |
| <input checked="" type="checkbox"/> | F10 | RGS1 14   | Unknown | 29.01 |               |          |        |
| <input checked="" type="checkbox"/> | F11 | RGS1 14   | Unknown | 28.68 |               |          |        |
| <input checked="" type="checkbox"/> | F12 | RGS1 14   | Unknown | 28.90 |               |          |        |
| <input checked="" type="checkbox"/> | G1  |           | Unknown |       |               |          |        |
| <input checked="" type="checkbox"/> | G2  |           | Unknown |       |               |          |        |

> - Late Cp call (last five cycles) has higher uncertainty

---

## Results

| Inc                                 | Pos | Name | Type    | CP | Concentration | Standard | Status |
|-------------------------------------|-----|------|---------|----|---------------|----------|--------|
| <input checked="" type="checkbox"/> | G3  |      | Unknown |    |               |          |        |
| <input checked="" type="checkbox"/> | G4  |      | Unknown |    |               |          |        |
| <input checked="" type="checkbox"/> | G5  |      | Unknown |    |               |          |        |
| <input checked="" type="checkbox"/> | G6  |      | Unknown |    |               |          |        |
| <input checked="" type="checkbox"/> | G7  |      | Unknown |    |               |          |        |
| <input checked="" type="checkbox"/> | G8  |      | Unknown |    |               |          |        |
| <input checked="" type="checkbox"/> | G9  |      | Unknown |    |               |          |        |
| <input checked="" type="checkbox"/> | G10 |      | Unknown |    |               |          |        |
| <input checked="" type="checkbox"/> | G11 |      | Unknown |    |               |          |        |
| <input checked="" type="checkbox"/> | G12 |      | Unknown |    |               |          |        |
| <input checked="" type="checkbox"/> | H1  |      | Unknown |    |               |          |        |
| <input checked="" type="checkbox"/> | H2  |      | Unknown |    |               |          |        |
| <input checked="" type="checkbox"/> | H3  |      | Unknown |    |               |          |        |
| <input checked="" type="checkbox"/> | H4  |      | Unknown |    |               |          |        |
| <input checked="" type="checkbox"/> | H5  |      | Unknown |    |               |          |        |
| <input checked="" type="checkbox"/> | H6  |      | Unknown |    |               |          |        |
| <input checked="" type="checkbox"/> | H7  |      | Unknown |    |               |          |        |
| <input checked="" type="checkbox"/> | H8  |      | Unknown |    |               |          |        |
| <input checked="" type="checkbox"/> | H9  |      | Unknown |    |               |          |        |
| <input checked="" type="checkbox"/> | H10 |      | Unknown |    |               |          |        |
| <input checked="" type="checkbox"/> | H11 |      | Unknown |    |               |          |        |
| <input checked="" type="checkbox"/> | H12 |      | Unknown |    |               |          |        |

> - Late Cp call (last five cycles) has higher uncertainty

### Amplification Curves

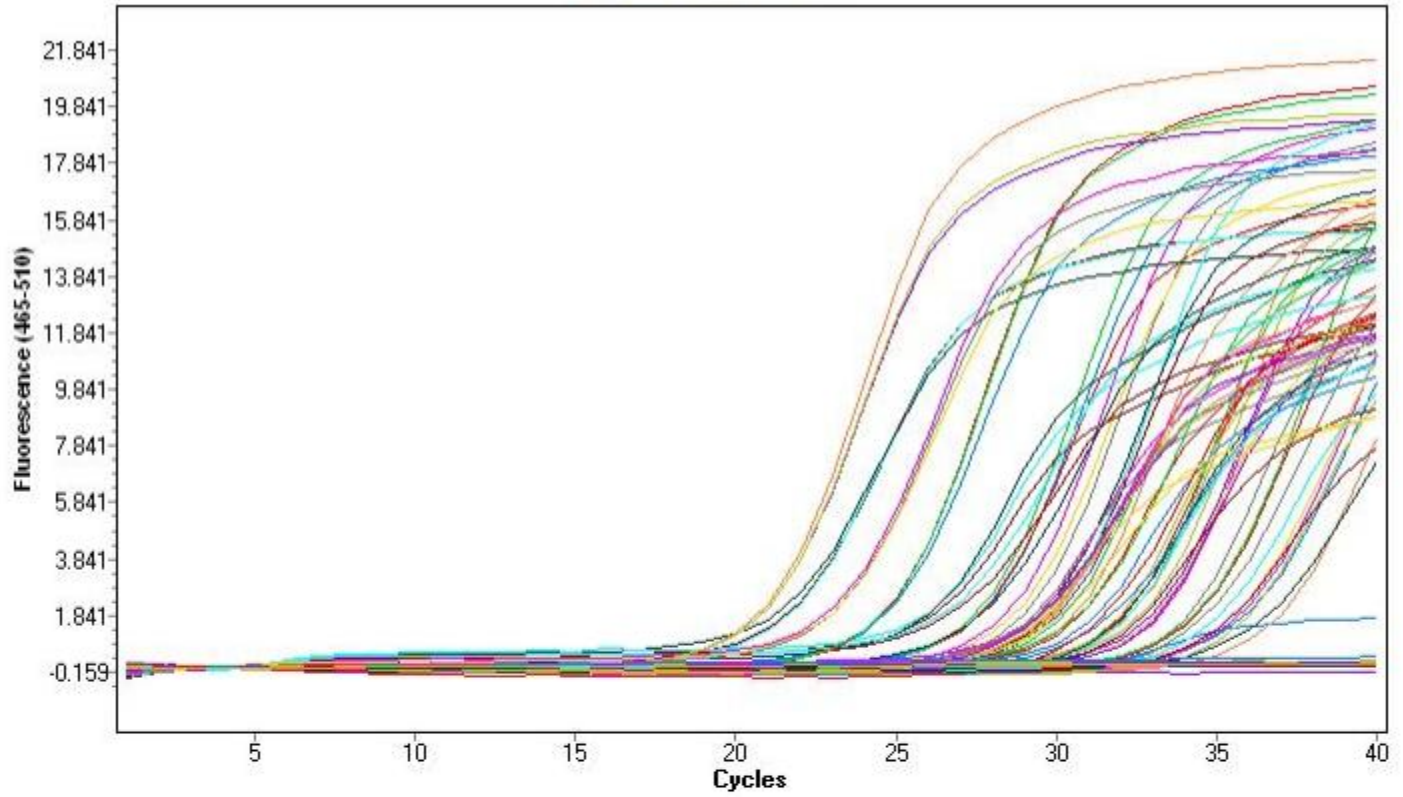

### Standard Curve

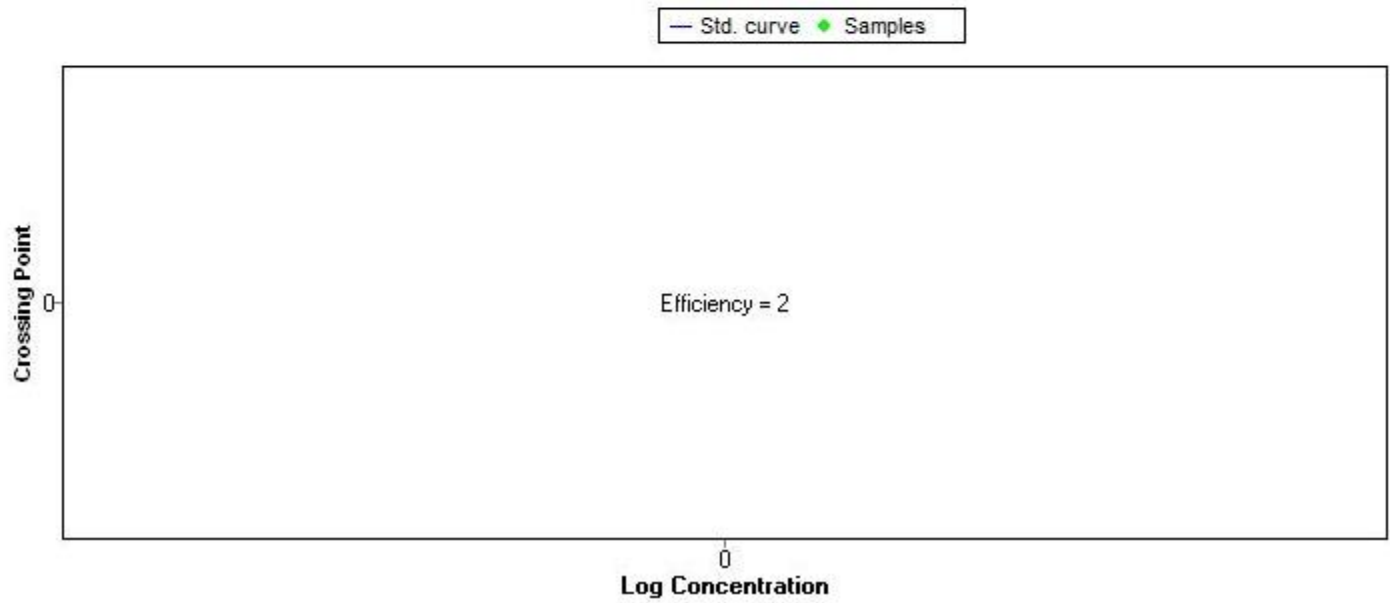

### Analysis Notes

**Abs Quant/Fit Points for All Samples (Abs Quant/Fit Points)**



## Settings

|                    |                       |                  |        |                    |         |  |
|--------------------|-----------------------|------------------|--------|--------------------|---------|--|
| Channel            | 465-510               |                  |        |                    |         |  |
| Color Compensation | Off                   |                  |        |                    |         |  |
| Standard Curve     | Set Efficiency (2.00) |                  |        |                    |         |  |
| Program            | Program               |                  |        |                    | Units   |  |
| First Cycle        | 1                     | Last Cycle       | 40     | Background         | 2-6     |  |
| Noiseband Method   | Auto                  | Noiseband        | 1.0130 | STD Dev Multiplier | 12.0000 |  |
| # of Fit Points    | 2                     | Threshold Method | Auto   | Threshold          | 1.0130  |  |

|             |             |
|-------------|-------------|
| Subset Name | All Samples |
|-------------|-------------|

## Results

| Inc                                 | Pos | Name     | Type    | CP    | Concentration | Standard | Status |
|-------------------------------------|-----|----------|---------|-------|---------------|----------|--------|
| <input checked="" type="checkbox"/> | A1  | GAPDH 1  | Unknown | 25.59 |               |          |        |
| <input checked="" type="checkbox"/> | A2  | GAPDH 1  | Unknown | 25.72 |               |          |        |
| <input checked="" type="checkbox"/> | A3  | GAPDH 1  | Unknown | 25.63 |               |          |        |
| <input checked="" type="checkbox"/> | A4  | GAPDH 2  | Unknown | 26.64 |               |          |        |
| <input checked="" type="checkbox"/> | A5  | GAPDH 2  | Unknown | 27.17 |               |          |        |
| <input checked="" type="checkbox"/> | A6  | GAPDH 2  | Unknown | 26.81 |               |          |        |
| <input checked="" type="checkbox"/> | A7  | GAPDH 3  | Unknown | 19.21 |               |          |        |
| <input checked="" type="checkbox"/> | A8  | GAPDH 3  | Unknown | 19.53 |               |          |        |
| <input checked="" type="checkbox"/> | A9  | GAPDH 3  | Unknown |       |               |          |        |
| <input checked="" type="checkbox"/> | A10 | GAPDH 4  | Unknown | 30.49 |               |          |        |
| <input checked="" type="checkbox"/> | A11 | GAPDH 4  | Unknown | 30.99 |               |          |        |
| <input checked="" type="checkbox"/> | A12 | GAPDH 4  | Unknown | 30.70 |               |          |        |
| <input checked="" type="checkbox"/> | B1  | FCER1A 1 | Unknown | 32.86 |               |          |        |
| <input checked="" type="checkbox"/> | B2  | FCER1A 1 | Unknown | 30.35 |               |          |        |
| <input checked="" type="checkbox"/> | B3  | FCER1A 1 | Unknown | 30.53 |               |          |        |
| <input checked="" type="checkbox"/> | B4  | FCER1A 2 | Unknown | 31.57 |               |          |        |
| <input checked="" type="checkbox"/> | B5  | FCER1A 2 | Unknown | 32.58 |               |          |        |
| <input checked="" type="checkbox"/> | B6  | FCER1A 2 | Unknown | 31.46 |               |          |        |
| <input checked="" type="checkbox"/> | B7  | FCER1A 3 | Unknown | 21.46 |               |          |        |
| <input checked="" type="checkbox"/> | B8  | FCER1A 3 | Unknown | 4.68  |               |          |        |
| <input checked="" type="checkbox"/> | B9  | FCER1A 3 | Unknown | 22.67 |               |          |        |
| <input checked="" type="checkbox"/> | B10 | FCER1A 4 | Unknown | 28.95 |               |          |        |
| <input checked="" type="checkbox"/> | B11 | FCER1A 4 | Unknown | 31.56 |               |          |        |
| <input checked="" type="checkbox"/> | B12 | FCER1A 4 | Unknown | 30.41 |               |          |        |
| <input checked="" type="checkbox"/> | C1  | RGS1 1   | Unknown | 33.80 |               |          |        |
| <input checked="" type="checkbox"/> | C2  | RGS1 1   | Unknown | 32.63 |               |          |        |
| <input checked="" type="checkbox"/> | C3  | RGS1 1   | Unknown | 32.49 |               |          |        |

## Results

| Inc                                 | Pos | Name      | Type    | CP    | Concentration | Standard | Status |
|-------------------------------------|-----|-----------|---------|-------|---------------|----------|--------|
| <input checked="" type="checkbox"/> | C4  | RGS1 2    | Unknown | 33.80 |               |          |        |
| <input checked="" type="checkbox"/> | C5  | RGS1 2    | Unknown | 32.92 |               |          |        |
| <input checked="" type="checkbox"/> | C6  | RGS1 2    | Unknown | 33.61 |               |          |        |
| <input checked="" type="checkbox"/> | C7  | RGS1 3    | Unknown | 20.58 |               |          |        |
| <input checked="" type="checkbox"/> | C8  | RGS1 3    | Unknown | 9.76  |               |          |        |
| <input checked="" type="checkbox"/> | C9  | RGS1 3    | Unknown | 25.46 |               |          |        |
| <input checked="" type="checkbox"/> | C10 | RGS1 4    | Unknown | 35.31 |               |          |        |
| <input checked="" type="checkbox"/> | C11 | RGS1 4    | Unknown |       |               |          |        |
| <input checked="" type="checkbox"/> | C12 | RGS1 4    | Unknown | 34.44 |               |          |        |
| <input checked="" type="checkbox"/> | D1  | GAPDH 5   | Unknown | 22.79 |               |          |        |
| <input checked="" type="checkbox"/> | D2  | GAPDH 5   | Unknown | 22.80 |               |          |        |
| <input checked="" type="checkbox"/> | D3  | GAPDH 5   | Unknown | 22.67 |               |          |        |
| <input checked="" type="checkbox"/> | D4  | GAPDH 7   | Unknown | 19.71 |               |          |        |
| <input checked="" type="checkbox"/> | D5  | GAPDH 7   | Unknown | 20.60 |               |          |        |
| <input checked="" type="checkbox"/> | D6  | GAPDH 7   | Unknown | 20.44 |               |          |        |
| <input checked="" type="checkbox"/> | D7  | GAPDH 11  | Unknown | 27.78 |               |          |        |
| <input checked="" type="checkbox"/> | D8  | GAPDH 11  | Unknown | 28.22 |               |          |        |
| <input checked="" type="checkbox"/> | D9  | GAPDH 11  | Unknown | 27.54 |               |          |        |
| <input checked="" type="checkbox"/> | D10 | GAPDH 14  | Unknown | 18.86 |               |          |        |
| <input checked="" type="checkbox"/> | D11 | GAPDH 14  | Unknown | 18.76 |               |          |        |
| <input checked="" type="checkbox"/> | D12 | GAPDH 14  | Unknown | 18.85 |               |          |        |
| <input checked="" type="checkbox"/> | E1  | FCER1A 5  | Unknown | 29.53 |               |          |        |
| <input checked="" type="checkbox"/> | E2  | FCER1A 5  | Unknown | 28.88 |               |          |        |
| <input checked="" type="checkbox"/> | E3  | FCER1A 5  | Unknown | 28.49 |               |          |        |
| <input checked="" type="checkbox"/> | E4  | FCER1A 7  | Unknown | 26.54 |               |          |        |
| <input checked="" type="checkbox"/> | E5  | FCER1A 7  | Unknown | 27.19 |               |          |        |
| <input checked="" type="checkbox"/> | E6  | FCER1A 7  | Unknown | 27.68 |               |          |        |
| <input checked="" type="checkbox"/> | E7  | FCER1A 11 | Unknown | 30.96 |               |          |        |
| <input checked="" type="checkbox"/> | E8  | FCER1A 11 | Unknown | 30.59 |               |          |        |
| <input checked="" type="checkbox"/> | E9  | FCER1A 11 | Unknown | 30.50 |               |          |        |
| <input checked="" type="checkbox"/> | E10 | FCER1A 14 | Unknown | 27.90 |               |          |        |
| <input checked="" type="checkbox"/> | E11 | FCER1A 14 | Unknown | 28.32 |               |          |        |
| <input checked="" type="checkbox"/> | E12 | FCER1A 14 | Unknown | 27.90 |               |          |        |
| <input checked="" type="checkbox"/> | F1  | RGS1 5    | Unknown | 29.61 |               |          |        |
| <input checked="" type="checkbox"/> | F2  | RGS1 5    | Unknown | 29.92 |               |          |        |
| <input checked="" type="checkbox"/> | F3  | RGS1 5    | Unknown | 28.61 |               |          |        |
| <input checked="" type="checkbox"/> | F4  | RGS1 7    | Unknown | 27.30 |               |          |        |

---

**Results**

| Inc                                 | Pos | Name    | Type    | CP    | Concentration | Standard | Status |
|-------------------------------------|-----|---------|---------|-------|---------------|----------|--------|
| <input checked="" type="checkbox"/> | F5  | RGS1 7  | Unknown | 27.13 |               |          |        |
| <input checked="" type="checkbox"/> | F6  | RGS1 7  | Unknown | 28.00 |               |          |        |
| <input checked="" type="checkbox"/> | F7  | RGS1 11 | Unknown | 33.60 |               |          |        |
| <input checked="" type="checkbox"/> | F8  | RGS1 11 | Unknown | 33.29 |               |          |        |
| <input checked="" type="checkbox"/> | F9  | RGS1 11 | Unknown | 34.56 |               |          |        |
| <input checked="" type="checkbox"/> | F10 | RGS1 14 | Unknown | 27.57 |               |          |        |
| <input checked="" type="checkbox"/> | F11 | RGS1 14 | Unknown | 27.48 |               |          |        |
| <input checked="" type="checkbox"/> | F12 | RGS1 14 | Unknown | 27.75 |               |          |        |
| <input checked="" type="checkbox"/> | G1  |         | Unknown |       |               |          |        |
| <input checked="" type="checkbox"/> | G2  |         | Unknown |       |               |          |        |
| <input checked="" type="checkbox"/> | G3  |         | Unknown |       |               |          |        |
| <input checked="" type="checkbox"/> | G4  |         | Unknown |       |               |          |        |
| <input checked="" type="checkbox"/> | G5  |         | Unknown |       |               |          |        |
| <input checked="" type="checkbox"/> | G6  |         | Unknown |       |               |          |        |
| <input checked="" type="checkbox"/> | G7  |         | Unknown |       |               |          |        |
| <input checked="" type="checkbox"/> | G8  |         | Unknown |       |               |          |        |
| <input checked="" type="checkbox"/> | G9  |         | Unknown |       |               |          |        |
| <input checked="" type="checkbox"/> | G10 |         | Unknown |       |               |          |        |
| <input checked="" type="checkbox"/> | G11 |         | Unknown |       |               |          |        |
| <input checked="" type="checkbox"/> | G12 |         | Unknown |       |               |          |        |
| <input checked="" type="checkbox"/> | H1  |         | Unknown |       |               |          |        |
| <input checked="" type="checkbox"/> | H2  |         | Unknown |       |               |          |        |
| <input checked="" type="checkbox"/> | H3  |         | Unknown |       |               |          |        |
| <input checked="" type="checkbox"/> | H4  |         | Unknown |       |               |          |        |
| <input checked="" type="checkbox"/> | H5  |         | Unknown |       |               |          |        |
| <input checked="" type="checkbox"/> | H6  |         | Unknown |       |               |          |        |
| <input checked="" type="checkbox"/> | H7  |         | Unknown |       |               |          |        |
| <input checked="" type="checkbox"/> | H8  |         | Unknown |       |               |          |        |
| <input checked="" type="checkbox"/> | H9  |         | Unknown |       |               |          |        |
| <input checked="" type="checkbox"/> | H10 |         | Unknown |       |               |          |        |
| <input checked="" type="checkbox"/> | H11 |         | Unknown |       |               |          |        |
| <input checked="" type="checkbox"/> | H12 |         | Unknown |       |               |          |        |

**Amplification Curves**

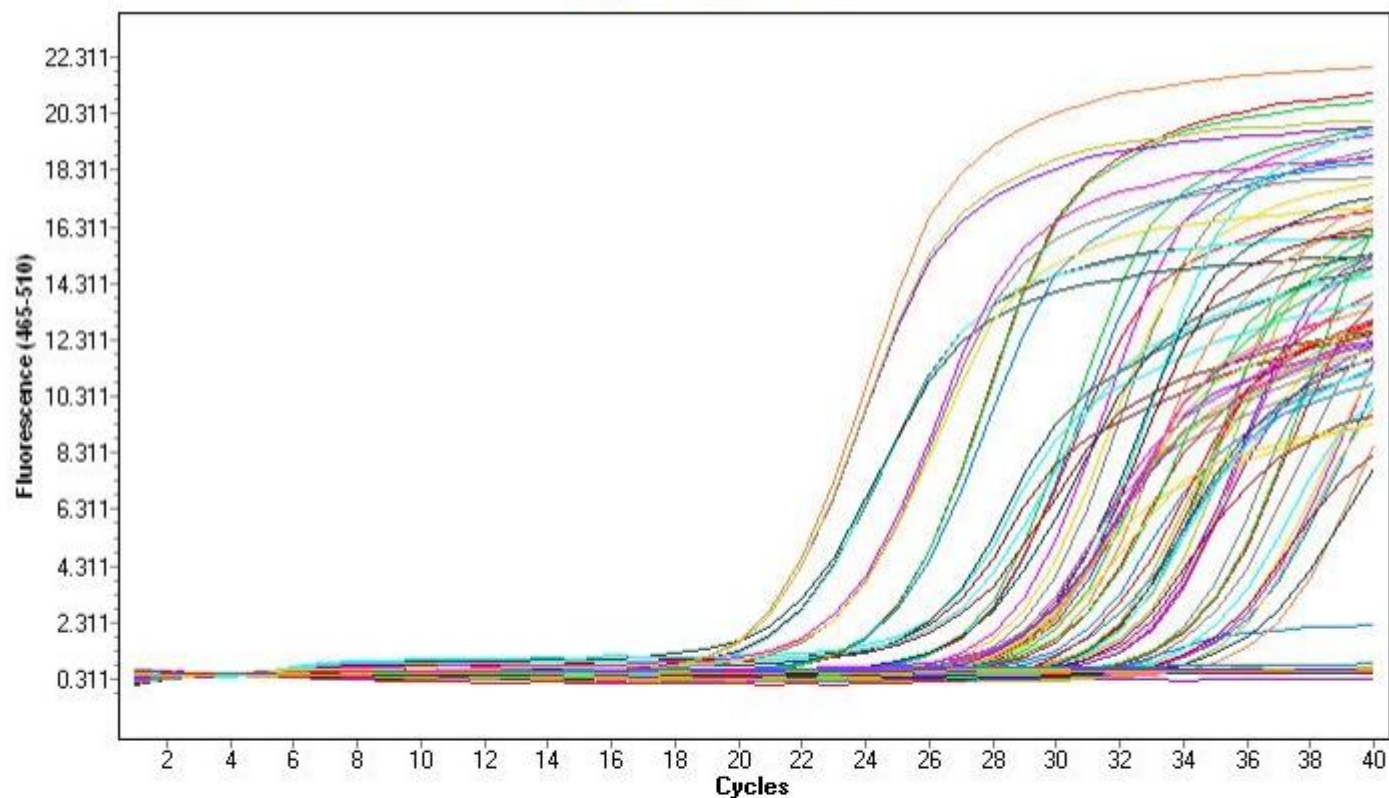

**Amplification Curves**

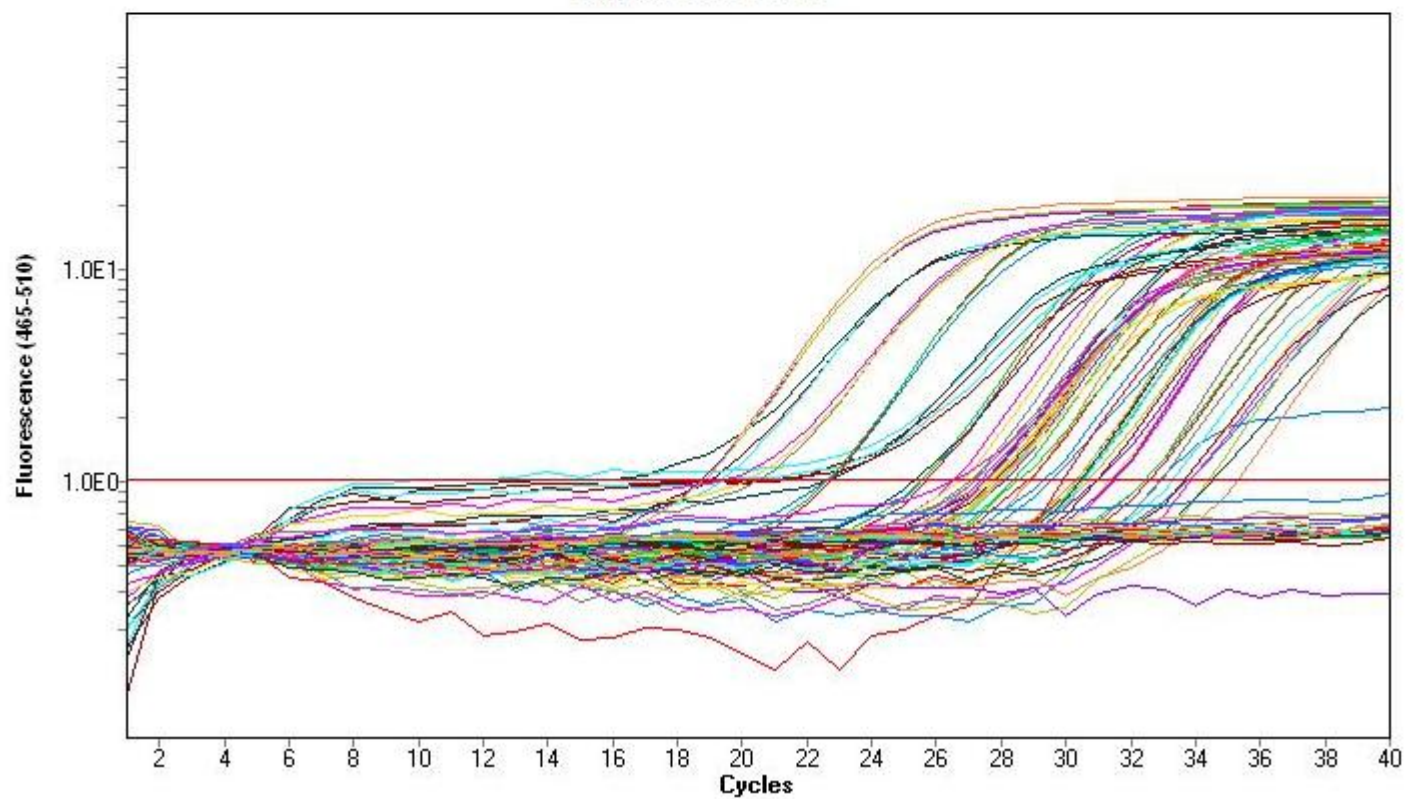

### Amplification Curves

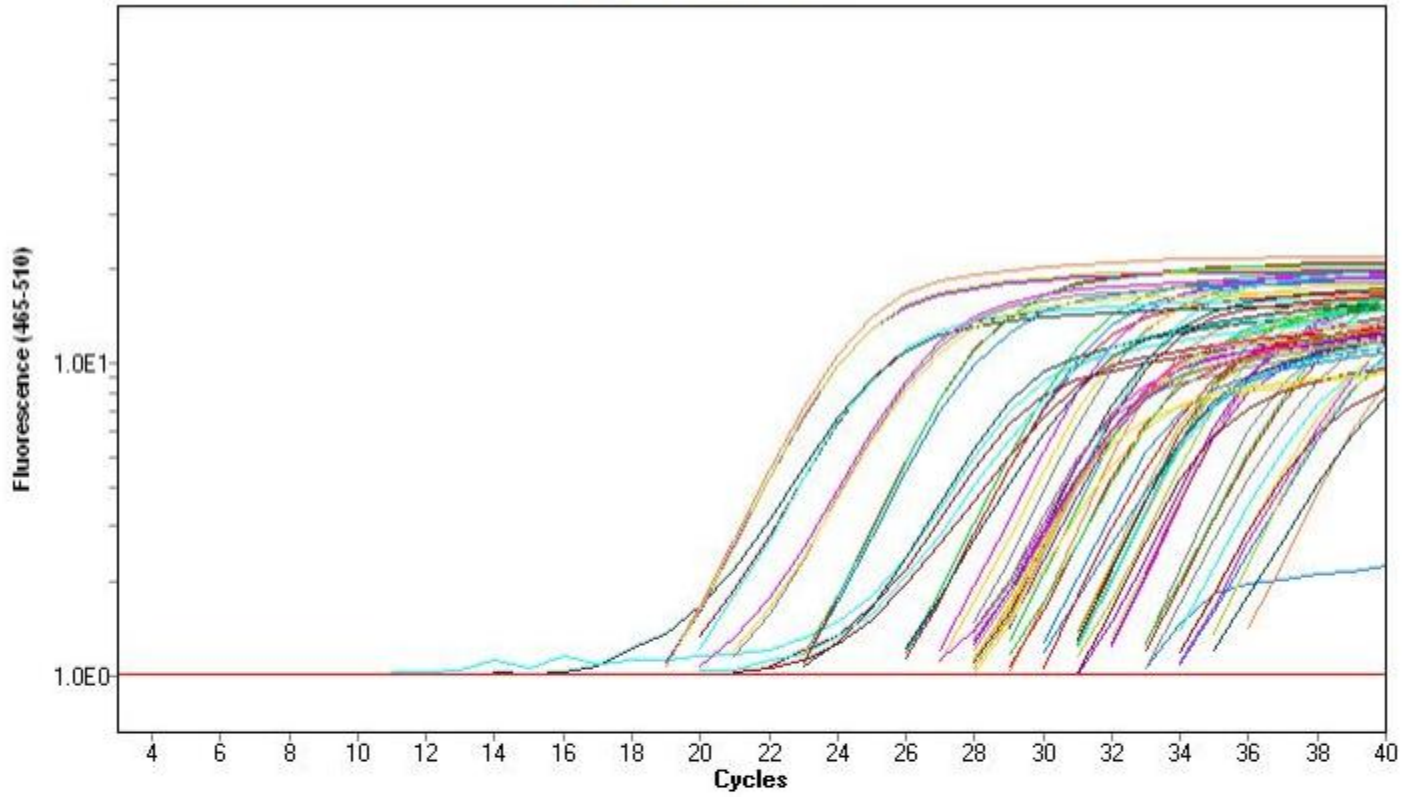

### Standard Curve

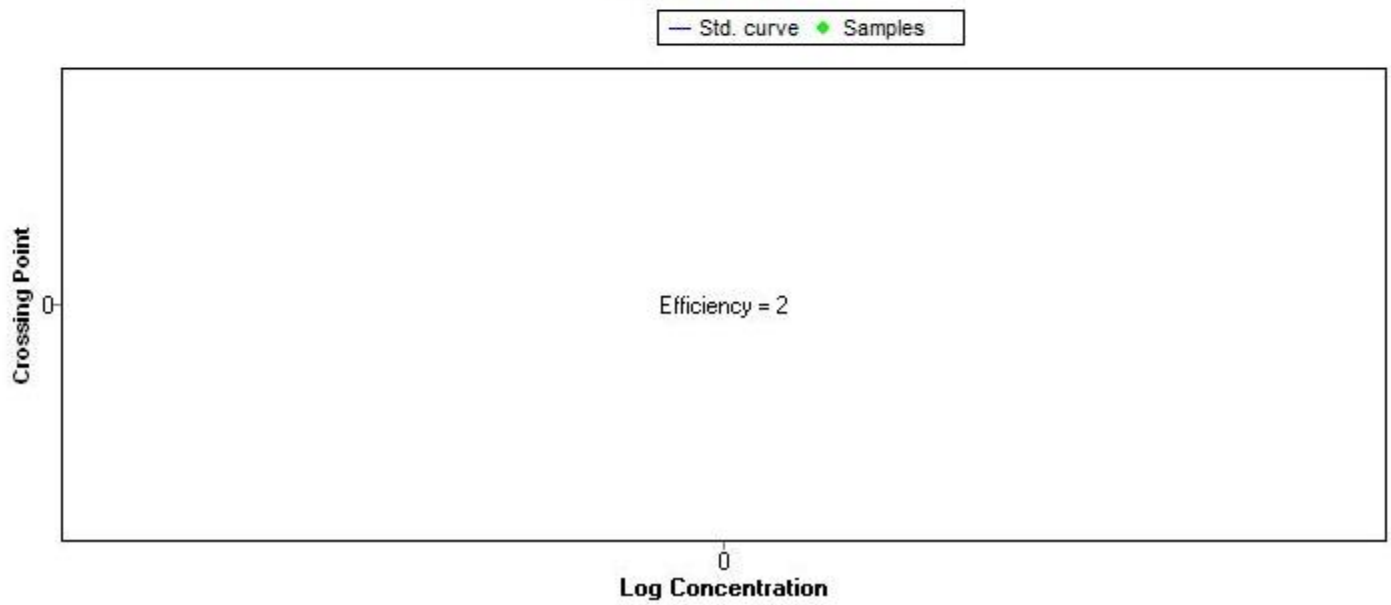

### Analysis Notes



### Melting Curves

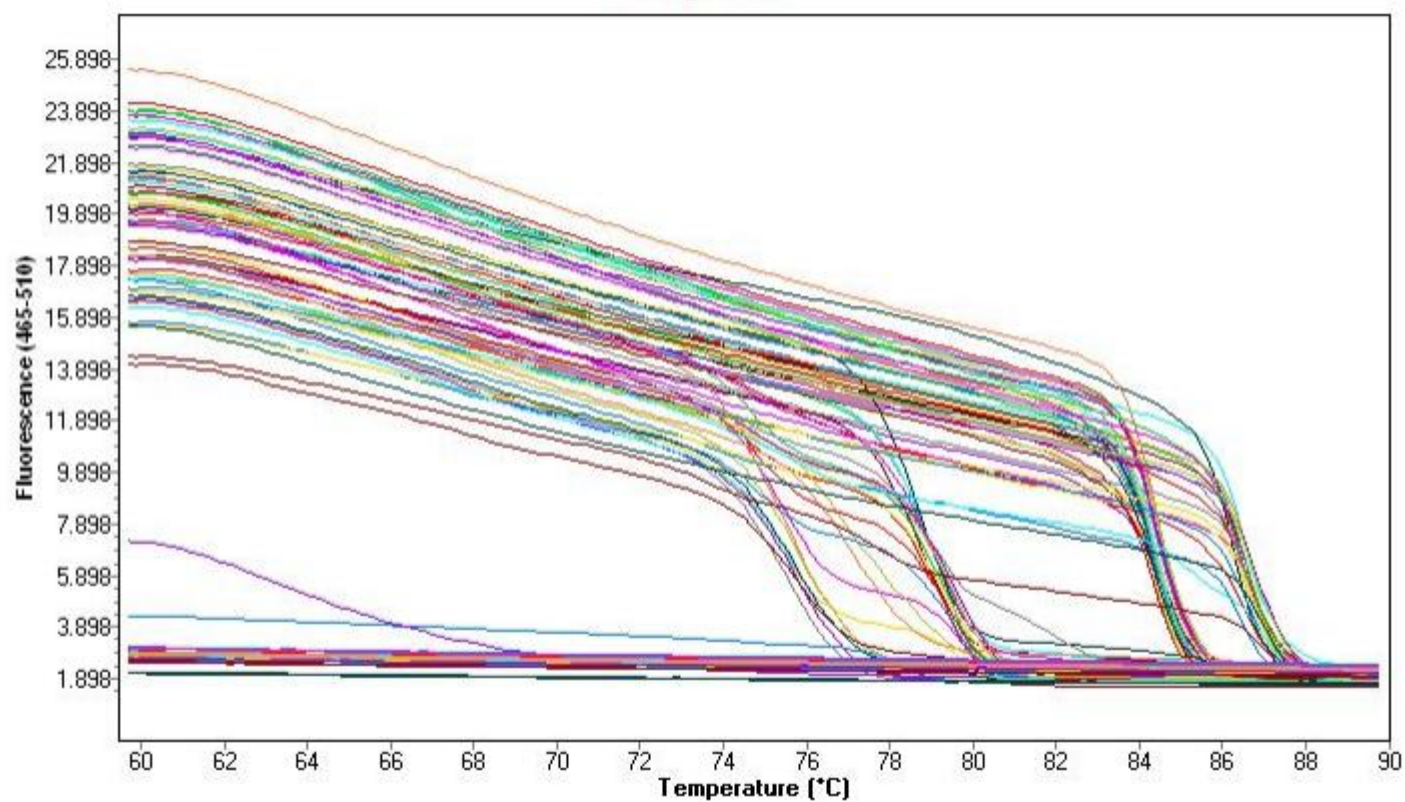

### Normalized Melting Curves

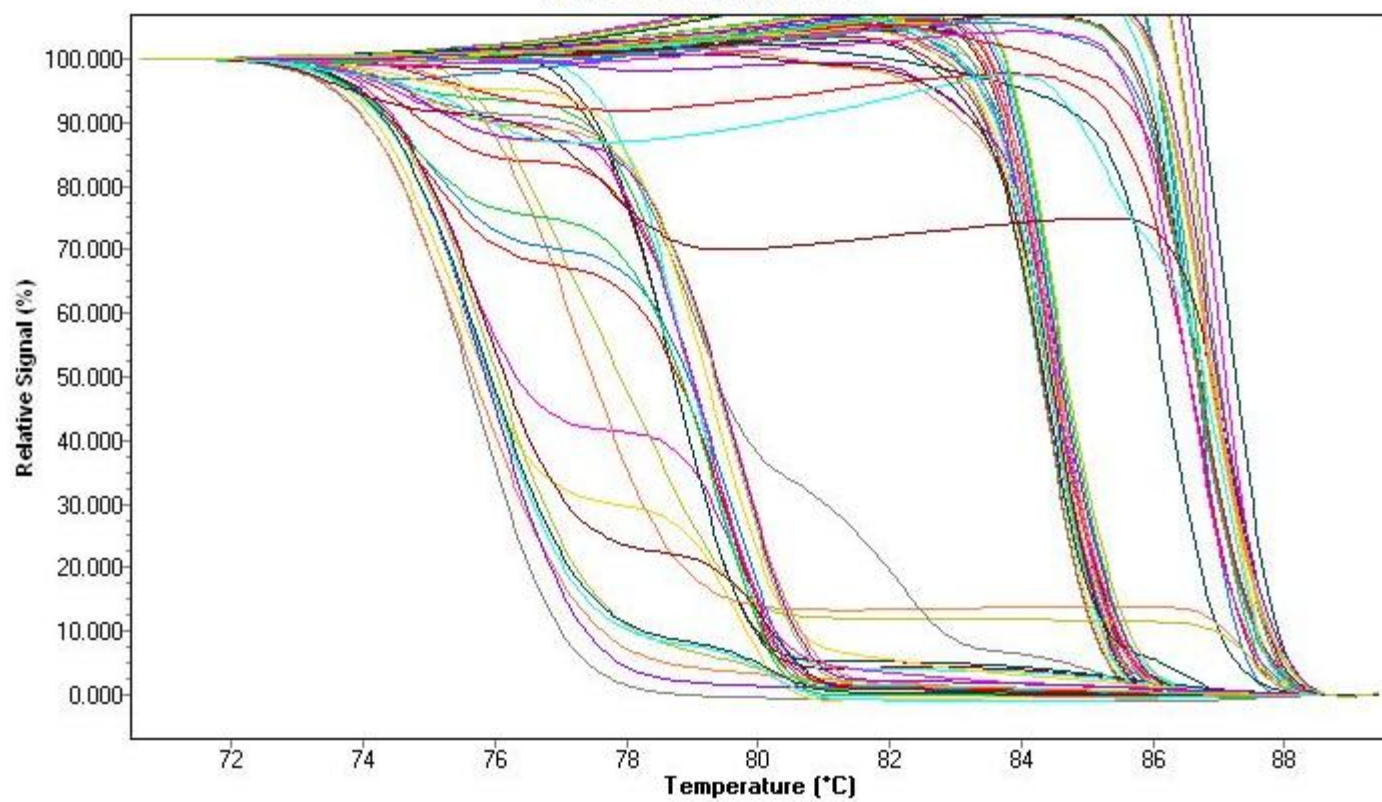

**Normalized and Shifted Melting Curves**

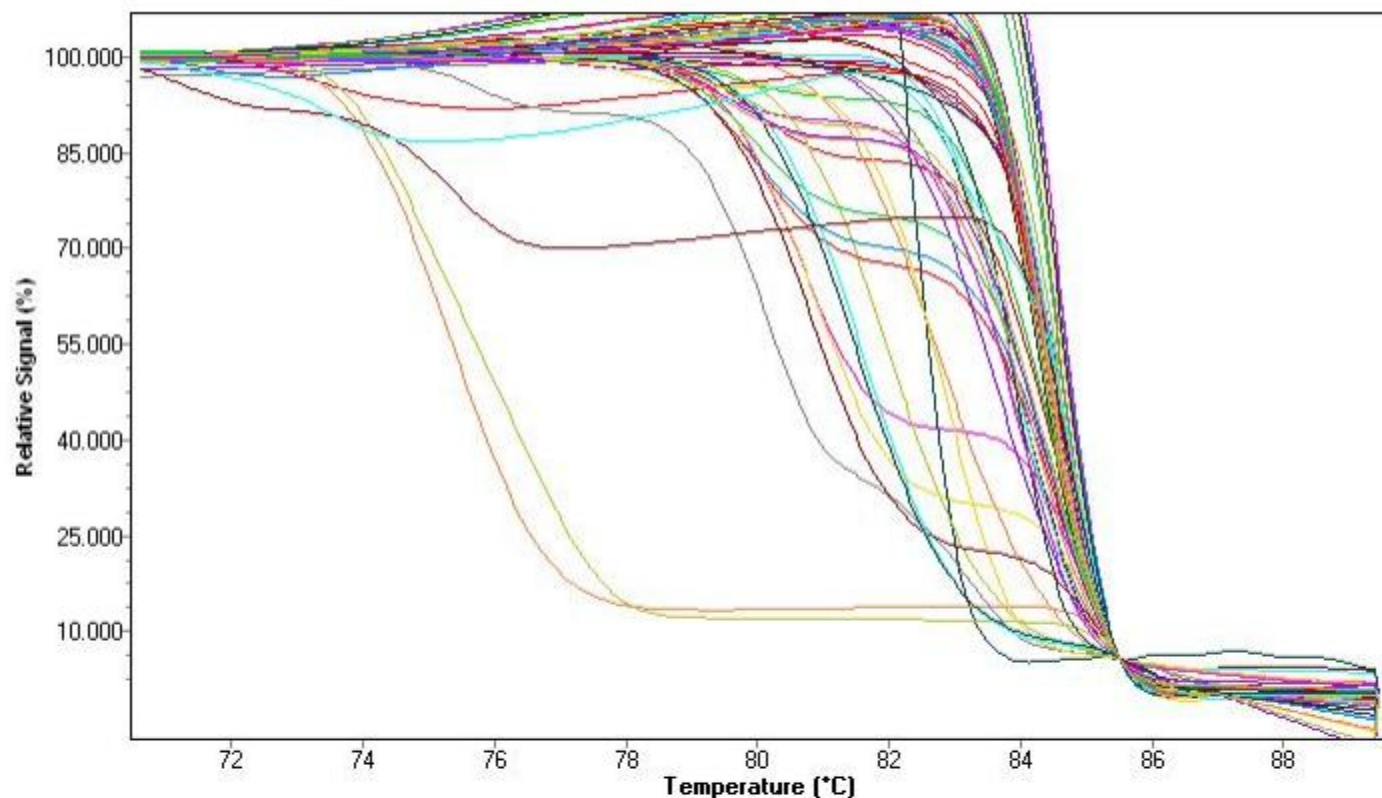

**Normalized and Temp-Shifted Difference Plot**

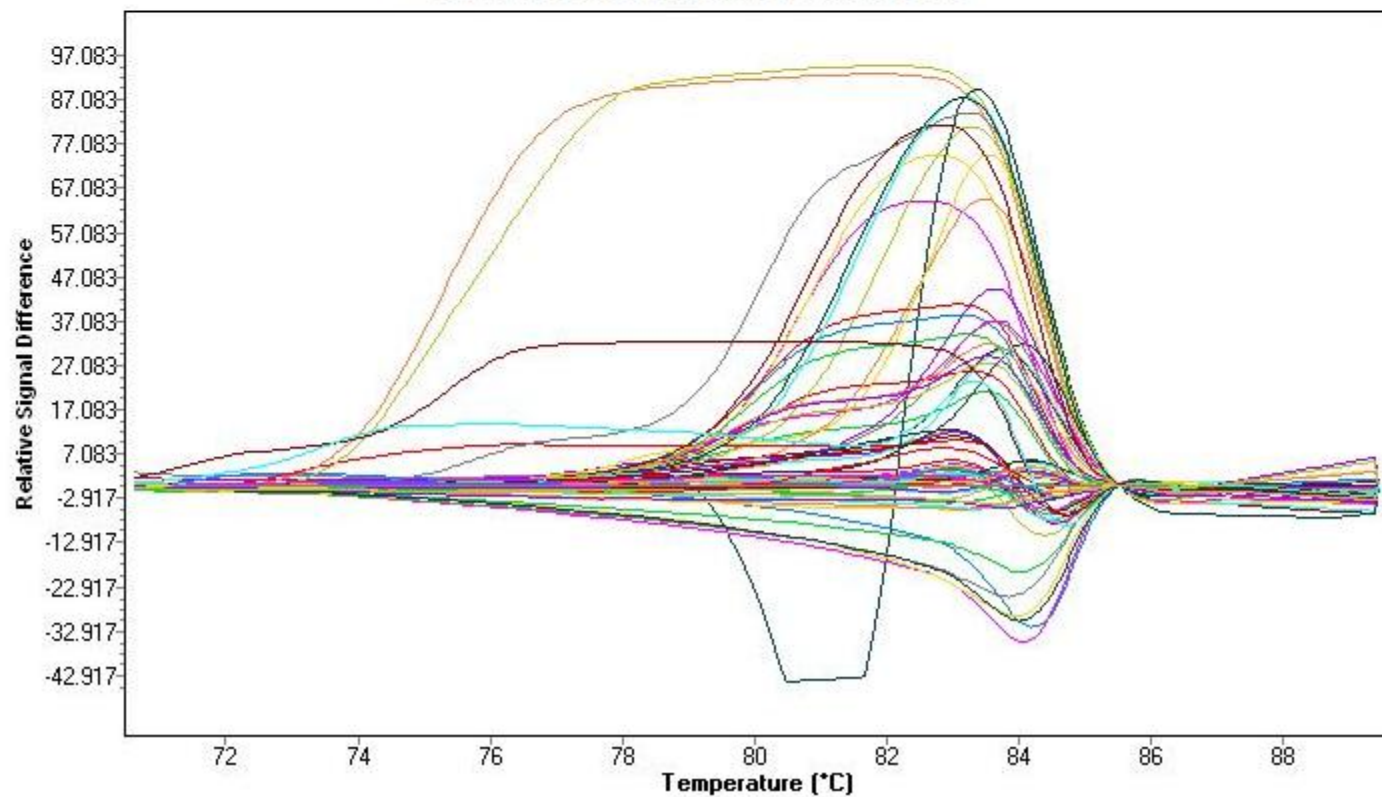

Analysis Notes

## Melt Curve Genotyping for All Samples (Melt Curve Genotyping)

|               |            |                    |       |
|---------------|------------|--------------------|-------|
| Channel       | 465-510    | Color Compensation | Off   |
| Program Name  | Program    |                    |       |
| Stds Settings | Auto-Group |                    |       |
| Sensitivity   | Normal     | Temp Range         | 63-86 |
| Score         | 0.7        | Res                | 0.1   |

|             |             |
|-------------|-------------|
| Subset Name | All Samples |
|-------------|-------------|

### Results

| Inc                                 | Pos. | Sample Name | Sample Type | Group | Score | Resolution | Status |
|-------------------------------------|------|-------------|-------------|-------|-------|------------|--------|
| <input checked="" type="checkbox"/> | A1   | GAPDH 1     | Unknown     | 1     | 0.98  | 0.95       |        |
| <input checked="" type="checkbox"/> | A2   | GAPDH 1     | Unknown     | 1     | 0.96  | 0.94       |        |
| <input checked="" type="checkbox"/> | A3   | GAPDH 1     | Unknown     | 1     | 0.98  | 0.96       |        |
| <input checked="" type="checkbox"/> | A4   | GAPDH 2     | Unknown     | 1     | 0.98  | 0.96       |        |
| <input checked="" type="checkbox"/> | A5   | GAPDH 2     | Unknown     | 1     | 0.97  | 0.95       |        |
| <input checked="" type="checkbox"/> | A6   | GAPDH 2     | Unknown     | 1     | 0.98  | 0.96       |        |
| <input checked="" type="checkbox"/> | A7   | GAPDH 3     | Unknown     | 1     | 0.99  | 0.95       |        |
| <input checked="" type="checkbox"/> | A8   | GAPDH 3     | Unknown     | 1     | 0.99  | 0.94       |        |
| <input checked="" type="checkbox"/> | A9   | GAPDH 3     | Unknown     | 1     | 0.96  | 0.93       |        |
| <input checked="" type="checkbox"/> | A10  | GAPDH 4     | Unknown     | 1     | 0.95  | 0.92       |        |
| <input checked="" type="checkbox"/> | A11  | GAPDH 4     | Unknown     | 1     | 0.97  | 0.91       |        |
| <input checked="" type="checkbox"/> | A12  | GAPDH 4     | Unknown     | 1     | 0.98  | 0.94       |        |
| <input checked="" type="checkbox"/> | B1   | FCER1A 1    | Unknown     | 2     | 0.82  | 0.76       |        |
| <input checked="" type="checkbox"/> | B2   | FCER1A 1    | Unknown     | 2     | 0.89  | 0.75       |        |
| <input checked="" type="checkbox"/> | B3   | FCER1A 1    | Unknown     | 2     | 0.86  | 0.80       |        |
| <input checked="" type="checkbox"/> | B4   | FCER1A 2    | Unknown     | 2     | 0.79  | 0.51       |        |
| <input checked="" type="checkbox"/> | B5   | FCER1A 2    | Unknown     | 2     | 0.94  | 0.87       |        |
| <input checked="" type="checkbox"/> | B6   | FCER1A 2    | Unknown     | 2     | 0.86  | 0.64       |        |
| <input checked="" type="checkbox"/> | B7   | FCER1A 3    | Unknown     | 2     | 0.81  | 0.75       |        |
| <input checked="" type="checkbox"/> | B8   | FCER1A 3    | Unknown     | 2     | 0.85  | 0.78       |        |
| <input checked="" type="checkbox"/> | B9   | FCER1A 3    | Unknown     | 2     | 0.74  | 0.70       |        |
| <input checked="" type="checkbox"/> | B10  | FCER1A 4    | Unknown     | 2     | 0.96  | 0.87       |        |
| <input checked="" type="checkbox"/> | B11  | FCER1A 4    | Unknown     | 2     | 0.95  | 0.86       |        |
| <input checked="" type="checkbox"/> | B12  | FCER1A 4    | Unknown     | 2     | 0.96  | 0.85       |        |
| <input checked="" type="checkbox"/> | C1   | RGS1 1      | Unknown     | 1     | 0.94  | 0.77       |        |
| <input checked="" type="checkbox"/> | C2   | RGS1 1      | Unknown     | 1     | 0.92  | 0.58       |        |
| <input checked="" type="checkbox"/> | C3   | RGS1 1      | Unknown     | 1     | 0.98  | 0.83       |        |
| <input checked="" type="checkbox"/> | C4   | RGS1 2      | Unknown     | 1     | 0.96  | 0.83       |        |
| <input checked="" type="checkbox"/> | C5   | RGS1 2      | Unknown     | 1     | 0.99  | 0.81       |        |
| <input checked="" type="checkbox"/> | C6   | RGS1 2      | Unknown     | 1     | 0.97  | 0.83       |        |
| <input checked="" type="checkbox"/> | C7   | RGS1 3      | Unknown     | 1     | 1.00  | 0.80       |        |



## Results

| Inc                                 | Pos. | Sample Name | Sample Type | Group | Score | Resolution | Status |
|-------------------------------------|------|-------------|-------------|-------|-------|------------|--------|
| <input checked="" type="checkbox"/> | C8   | RGS1 3      | Unknown     | 1     | 0.99  | 0.79       |        |
| <input checked="" type="checkbox"/> | C9   | RGS1 3      | Unknown     | 1     | 0.93  | 0.86       |        |
| <input checked="" type="checkbox"/> | C10  | RGS1 4      | Unknown     | 2     | 0.97  | 0.73       |        |
| <input checked="" type="checkbox"/> | C11  | RGS1 4      | Unknown     | 3     | 1.00  | 0.99       |        |
| <input checked="" type="checkbox"/> | C12  | RGS1 4      | Unknown     | 2     | 1.00  | 0.80       |        |
| <input checked="" type="checkbox"/> | D1   | GAPDH 5     | Unknown     | 1     | 0.99  | 0.95       |        |
| <input checked="" type="checkbox"/> | D2   | GAPDH 5     | Unknown     | 1     | 0.98  | 0.95       |        |
| <input checked="" type="checkbox"/> | D3   | GAPDH 5     | Unknown     | 1     | 0.98  | 0.94       |        |
| <input checked="" type="checkbox"/> | D4   | GAPDH 7     | Unknown     | 1     | 0.98  | 0.94       |        |
| <input checked="" type="checkbox"/> | D5   | GAPDH 7     | Unknown     | 1     | 0.98  | 0.95       |        |
| <input checked="" type="checkbox"/> | D6   | GAPDH 7     | Unknown     | 1     | 0.96  | 0.94       |        |
| <input checked="" type="checkbox"/> | D7   | GAPDH 11    | Unknown     | 1     | 0.95  | 0.92       |        |
| <input checked="" type="checkbox"/> | D8   | GAPDH 11    | Unknown     | 1     | 0.98  | 0.95       |        |
| <input checked="" type="checkbox"/> | D9   | GAPDH 11    | Unknown     | 1     | 0.95  | 0.93       |        |
| <input checked="" type="checkbox"/> | D10  | GAPDH 14    | Unknown     | 1     | 0.96  | 0.93       |        |
| <input checked="" type="checkbox"/> | D11  | GAPDH 14    | Unknown     | 1     | 0.97  | 0.94       |        |
| <input checked="" type="checkbox"/> | D12  | GAPDH 14    | Unknown     | 1     | 0.98  | 0.93       |        |
| <input checked="" type="checkbox"/> | E1   | FCER1A 5    | Unknown     | 2     | 0.78  | 0.54       |        |
| <input checked="" type="checkbox"/> | E2   | FCER1A 5    | Unknown     | 2     | 0.76  | 0.50       |        |
| <input checked="" type="checkbox"/> | E3   | FCER1A 5    | Unknown     | 2     | 0.84  | 0.62       |        |
| <input checked="" type="checkbox"/> | E4   | FCER1A 7    | Unknown     | 2     | 0.94  | 0.81       |        |
| <input checked="" type="checkbox"/> | E5   | FCER1A 7    | Unknown     | 2     | 0.91  | 0.69       |        |
| <input checked="" type="checkbox"/> | E6   | FCER1A 7    | Unknown     | 2     | 0.92  | 0.83       |        |
| <input checked="" type="checkbox"/> | E7   | FCER1A 11   | Unknown     | 2     | 0.93  | 0.73       |        |
| <input checked="" type="checkbox"/> | E8   | FCER1A 11   | Unknown     | 2     | 0.97  | 0.85       |        |
| <input checked="" type="checkbox"/> | E9   | FCER1A 11   | Unknown     | 2     | 0.97  | 0.86       |        |
| <input checked="" type="checkbox"/> | E10  | FCER1A 14   | Unknown     | 2     | 0.93  | 0.78       |        |
| <input checked="" type="checkbox"/> | E11  | FCER1A 14   | Unknown     | 2     | 0.92  | 0.78       |        |
| <input checked="" type="checkbox"/> | E12  | FCER1A 14   | Unknown     | 2     | 0.92  | 0.81       |        |
| <input checked="" type="checkbox"/> | F1   | RGS1 5      | Unknown     | 1     | 0.98  | 0.75       |        |
| <input checked="" type="checkbox"/> | F2   | RGS1 5      | Unknown     | 1     | 0.95  | 0.78       |        |
| <input checked="" type="checkbox"/> | F3   | RGS1 5      | Unknown     | 1     | 0.99  | 0.78       |        |
| <input checked="" type="checkbox"/> | F4   | RGS1 7      | Unknown     | 1     | 0.99  | 0.78       |        |
| <input checked="" type="checkbox"/> | F5   | RGS1 7      | Unknown     | 1     | 0.99  | 0.78       |        |
| <input checked="" type="checkbox"/> | F6   | RGS1 7      | Unknown     | 1     | 0.99  | 0.79       |        |
| <input checked="" type="checkbox"/> | F7   | RGS1 11     | Unknown     | 1     | 0.73  | 0.16       |        |
| <input checked="" type="checkbox"/> | F8   | RGS1 11     | Unknown     | 1     | 0.87  | 0.50       |        |
| <input checked="" type="checkbox"/> | F9   | RGS1 11     | Unknown     | 1     | 0.95  | 0.83       |        |

## Results

| Inc                                 | Pos. | Sample Name | Sample Type | Group    | Score | Resolution | Status |
|-------------------------------------|------|-------------|-------------|----------|-------|------------|--------|
| <input checked="" type="checkbox"/> | F10  | RGS1 14     | Unknown     | 1        | 0.99  | 0.81       |        |
| <input checked="" type="checkbox"/> | F11  | RGS1 14     | Unknown     | 1        | 0.99  | 0.82       |        |
| <input checked="" type="checkbox"/> | F12  | RGS1 14     | Unknown     | 1        | 0.99  | 0.80       |        |
| <input checked="" type="checkbox"/> | G1   |             | Unknown     | Negative | 1.00  | 1.00       |        |
| <input checked="" type="checkbox"/> | G2   |             | Unknown     | Negative | 1.00  | 1.00       |        |
| <input checked="" type="checkbox"/> | G3   |             | Unknown     | Negative | 1.00  | 1.00       |        |
| <input checked="" type="checkbox"/> | G4   |             | Unknown     | Negative | 1.00  | 1.00       |        |
| <input checked="" type="checkbox"/> | G5   |             | Unknown     | Negative | 1.00  | 1.00       |        |
| <input checked="" type="checkbox"/> | G6   |             | Unknown     | Negative | 1.00  | 1.00       |        |
| <input checked="" type="checkbox"/> | G7   |             | Unknown     | Negative | 1.00  | 1.00       |        |
| <input checked="" type="checkbox"/> | G8   |             | Unknown     | Negative | 1.00  | 1.00       |        |
| <input checked="" type="checkbox"/> | G9   |             | Unknown     | Negative | 1.00  | 1.00       |        |
| <input checked="" type="checkbox"/> | G10  |             | Unknown     | Negative | 1.00  | 1.00       |        |
| <input checked="" type="checkbox"/> | G11  |             | Unknown     | Negative | 1.00  | 1.00       |        |
| <input checked="" type="checkbox"/> | G12  |             | Unknown     | Negative | 1.00  | 1.00       |        |
| <input checked="" type="checkbox"/> | H1   |             | Unknown     | Negative | 1.00  | 1.00       |        |
| <input checked="" type="checkbox"/> | H2   |             | Unknown     | Negative | 1.00  | 1.00       |        |
| <input checked="" type="checkbox"/> | H3   |             | Unknown     | Negative | 1.00  | 1.00       |        |
| <input checked="" type="checkbox"/> | H4   |             | Unknown     | Negative | 1.00  | 1.00       |        |
| <input checked="" type="checkbox"/> | H5   |             | Unknown     | Negative | 1.00  | 1.00       |        |
| <input checked="" type="checkbox"/> | H6   |             | Unknown     | Negative | 1.00  | 1.00       |        |
| <input checked="" type="checkbox"/> | H7   |             | Unknown     | Negative | 1.00  | 1.00       |        |
| <input checked="" type="checkbox"/> | H8   |             | Unknown     | Negative | 1.00  | 1.00       |        |
| <input checked="" type="checkbox"/> | H9   |             | Unknown     | Negative | 1.00  | 1.00       |        |
| <input checked="" type="checkbox"/> | H10  |             | Unknown     | Negative | 1.00  | 1.00       |        |
| <input checked="" type="checkbox"/> | H11  |             | Unknown     | Negative | 1.00  | 1.00       |        |
| <input checked="" type="checkbox"/> | H12  |             | Unknown     | Negative | 1.00  | 1.00       |        |

## Group 1

| Inc                                 | Pos | Sample Name | Sample Type | Score | Resolution | Status |
|-------------------------------------|-----|-------------|-------------|-------|------------|--------|
| <input checked="" type="checkbox"/> | A1  | GAPDH 1     | Unknown     | 0.98  | 0.95       |        |
| <input checked="" type="checkbox"/> | A2  | GAPDH 1     | Unknown     | 0.96  | 0.94       |        |
| <input checked="" type="checkbox"/> | A3  | GAPDH 1     | Unknown     | 0.98  | 0.96       |        |
| <input checked="" type="checkbox"/> | A4  | GAPDH 2     | Unknown     | 0.98  | 0.96       |        |
| <input checked="" type="checkbox"/> | A5  | GAPDH 2     | Unknown     | 0.97  | 0.95       |        |
| <input checked="" type="checkbox"/> | A6  | GAPDH 2     | Unknown     | 0.98  | 0.96       |        |
| <input checked="" type="checkbox"/> | A7  | GAPDH 3     | Unknown     | 0.99  | 0.95       |        |
| <input checked="" type="checkbox"/> | A8  | GAPDH 3     | Unknown     | 0.99  | 0.94       |        |

| Group 1                             |     |             |             |       |            |        |
|-------------------------------------|-----|-------------|-------------|-------|------------|--------|
| Inc                                 | Pos | Sample Name | Sample Type | Score | Resolution | Status |
| <input checked="" type="checkbox"/> | A9  | GAPDH 3     | Unknown     | 0.96  | 0.93       |        |
| <input checked="" type="checkbox"/> | A10 | GAPDH 4     | Unknown     | 0.95  | 0.92       |        |
| <input checked="" type="checkbox"/> | A11 | GAPDH 4     | Unknown     | 0.97  | 0.91       |        |
| <input checked="" type="checkbox"/> | A12 | GAPDH 4     | Unknown     | 0.98  | 0.94       |        |
| <input checked="" type="checkbox"/> | C1  | RGS1 1      | Unknown     | 0.94  | 0.77       |        |
| <input checked="" type="checkbox"/> | C2  | RGS1 1      | Unknown     | 0.92  | 0.58       |        |
| <input checked="" type="checkbox"/> | C3  | RGS1 1      | Unknown     | 0.98  | 0.83       |        |
| <input checked="" type="checkbox"/> | C4  | RGS1 2      | Unknown     | 0.96  | 0.83       |        |
| <input checked="" type="checkbox"/> | C5  | RGS1 2      | Unknown     | 0.99  | 0.81       |        |
| <input checked="" type="checkbox"/> | C6  | RGS1 2      | Unknown     | 0.97  | 0.83       |        |
| <input checked="" type="checkbox"/> | C7  | RGS1 3      | Unknown     | 1.00  | 0.80       |        |
| <input checked="" type="checkbox"/> | C8  | RGS1 3      | Unknown     | 0.99  | 0.79       |        |
| <input checked="" type="checkbox"/> | C9  | RGS1 3      | Unknown     | 0.93  | 0.86       |        |
| <input checked="" type="checkbox"/> | D1  | GAPDH 5     | Unknown     | 0.99  | 0.95       |        |
| <input checked="" type="checkbox"/> | D2  | GAPDH 5     | Unknown     | 0.98  | 0.95       |        |
| <input checked="" type="checkbox"/> | D3  | GAPDH 5     | Unknown     | 0.98  | 0.94       |        |
| <input checked="" type="checkbox"/> | D4  | GAPDH 7     | Unknown     | 0.98  | 0.94       |        |
| <input checked="" type="checkbox"/> | D5  | GAPDH 7     | Unknown     | 0.98  | 0.95       |        |
| <input checked="" type="checkbox"/> | D6  | GAPDH 7     | Unknown     | 0.96  | 0.94       |        |
| <input checked="" type="checkbox"/> | D7  | GAPDH 11    | Unknown     | 0.95  | 0.92       |        |
| <input checked="" type="checkbox"/> | D8  | GAPDH 11    | Unknown     | 0.98  | 0.95       |        |
| <input checked="" type="checkbox"/> | D9  | GAPDH 11    | Unknown     | 0.95  | 0.93       |        |
| <input checked="" type="checkbox"/> | D10 | GAPDH 14    | Unknown     | 0.96  | 0.93       |        |
| <input checked="" type="checkbox"/> | D11 | GAPDH 14    | Unknown     | 0.97  | 0.94       |        |
| <input checked="" type="checkbox"/> | D12 | GAPDH 14    | Unknown     | 0.98  | 0.93       |        |
| <input checked="" type="checkbox"/> | F1  | RGS1 5      | Unknown     | 0.98  | 0.75       |        |
| <input checked="" type="checkbox"/> | F2  | RGS1 5      | Unknown     | 0.95  | 0.78       |        |
| <input checked="" type="checkbox"/> | F3  | RGS1 5      | Unknown     | 0.99  | 0.78       |        |
| <input checked="" type="checkbox"/> | F4  | RGS1 7      | Unknown     | 0.99  | 0.78       |        |
| <input checked="" type="checkbox"/> | F5  | RGS1 7      | Unknown     | 0.99  | 0.78       |        |
| <input checked="" type="checkbox"/> | F6  | RGS1 7      | Unknown     | 0.99  | 0.79       |        |
| <input checked="" type="checkbox"/> | F7  | RGS1 11     | Unknown     | 0.73  | 0.16       |        |
| <input checked="" type="checkbox"/> | F8  | RGS1 11     | Unknown     | 0.87  | 0.50       |        |
| <input checked="" type="checkbox"/> | F9  | RGS1 11     | Unknown     | 0.95  | 0.83       |        |
| <input checked="" type="checkbox"/> | F10 | RGS1 14     | Unknown     | 0.99  | 0.81       |        |
| <input checked="" type="checkbox"/> | F11 | RGS1 14     | Unknown     | 0.99  | 0.82       |        |
| <input checked="" type="checkbox"/> | F12 | RGS1 14     | Unknown     | 0.99  | 0.80       |        |

|              |   |
|--------------|---|
| <b>Group</b> | 2 |
|--------------|---|

| Inc                                 | Pos | Sample Name | Sample Type | Score | Resolution | Status |
|-------------------------------------|-----|-------------|-------------|-------|------------|--------|
| <input checked="" type="checkbox"/> | B1  | FCER1A 1    | Unknown     | 0.82  | 0.76       |        |
| <input checked="" type="checkbox"/> | B2  | FCER1A 1    | Unknown     | 0.89  | 0.75       |        |
| <input checked="" type="checkbox"/> | B3  | FCER1A 1    | Unknown     | 0.86  | 0.80       |        |
| <input checked="" type="checkbox"/> | B4  | FCER1A 2    | Unknown     | 0.79  | 0.51       |        |
| <input checked="" type="checkbox"/> | B5  | FCER1A 2    | Unknown     | 0.94  | 0.87       |        |
| <input checked="" type="checkbox"/> | B6  | FCER1A 2    | Unknown     | 0.86  | 0.64       |        |
| <input checked="" type="checkbox"/> | B7  | FCER1A 3    | Unknown     | 0.81  | 0.75       |        |
| <input checked="" type="checkbox"/> | B8  | FCER1A 3    | Unknown     | 0.85  | 0.78       |        |
| <input checked="" type="checkbox"/> | B9  | FCER1A 3    | Unknown     | 0.74  | 0.70       |        |
| <input checked="" type="checkbox"/> | B10 | FCER1A 4    | Unknown     | 0.96  | 0.87       |        |
| <input checked="" type="checkbox"/> | B11 | FCER1A 4    | Unknown     | 0.95  | 0.86       |        |
| <input checked="" type="checkbox"/> | B12 | FCER1A 4    | Unknown     | 0.96  | 0.85       |        |
| <input checked="" type="checkbox"/> | C10 | RGS1 4      | Unknown     | 0.97  | 0.73       |        |
| <input checked="" type="checkbox"/> | C12 | RGS1 4      | Unknown     | 1.00  | 0.80       |        |
| <input checked="" type="checkbox"/> | E1  | FCER1A 5    | Unknown     | 0.78  | 0.54       |        |
| <input checked="" type="checkbox"/> | E2  | FCER1A 5    | Unknown     | 0.76  | 0.50       |        |
| <input checked="" type="checkbox"/> | E3  | FCER1A 5    | Unknown     | 0.84  | 0.62       |        |
| <input checked="" type="checkbox"/> | E4  | FCER1A 7    | Unknown     | 0.94  | 0.81       |        |
| <input checked="" type="checkbox"/> | E5  | FCER1A 7    | Unknown     | 0.91  | 0.69       |        |
| <input checked="" type="checkbox"/> | E6  | FCER1A 7    | Unknown     | 0.92  | 0.83       |        |
| <input checked="" type="checkbox"/> | E7  | FCER1A 11   | Unknown     | 0.93  | 0.73       |        |
| <input checked="" type="checkbox"/> | E8  | FCER1A 11   | Unknown     | 0.97  | 0.85       |        |
| <input checked="" type="checkbox"/> | E9  | FCER1A 11   | Unknown     | 0.97  | 0.86       |        |
| <input checked="" type="checkbox"/> | E10 | FCER1A 14   | Unknown     | 0.93  | 0.78       |        |
| <input checked="" type="checkbox"/> | E11 | FCER1A 14   | Unknown     | 0.92  | 0.78       |        |
| <input checked="" type="checkbox"/> | E12 | FCER1A 14   | Unknown     | 0.92  | 0.81       |        |

|              |   |
|--------------|---|
| <b>Group</b> | 3 |
|--------------|---|

| Inc                                 | Pos | Sample Name | Sample Type | Score | Resolution | Status |
|-------------------------------------|-----|-------------|-------------|-------|------------|--------|
| <input checked="" type="checkbox"/> | C11 | RGS1 4      | Unknown     | 1.00  | 0.99       |        |

|              |          |
|--------------|----------|
| <b>Group</b> | Negative |
|--------------|----------|

| Inc                                 | Pos | Sample Name | Sample Type | Score | Resolution | Status |
|-------------------------------------|-----|-------------|-------------|-------|------------|--------|
| <input checked="" type="checkbox"/> | G1  |             | Unknown     | 1.00  | 1.00       |        |
| <input checked="" type="checkbox"/> | G2  |             | Unknown     | 1.00  | 1.00       |        |
| <input checked="" type="checkbox"/> | G3  |             | Unknown     | 1.00  | 1.00       |        |
| <input checked="" type="checkbox"/> | G4  |             | Unknown     | 1.00  | 1.00       |        |
| <input checked="" type="checkbox"/> | G5  |             | Unknown     | 1.00  | 1.00       |        |

| Group Negative                      |     |             |             |       |            |        |
|-------------------------------------|-----|-------------|-------------|-------|------------|--------|
| Inc                                 | Pos | Sample Name | Sample Type | Score | Resolution | Status |
| <input checked="" type="checkbox"/> | G6  |             | Unknown     | 1.00  | 1.00       |        |
| <input checked="" type="checkbox"/> | G7  |             | Unknown     | 1.00  | 1.00       |        |
| <input checked="" type="checkbox"/> | G8  |             | Unknown     | 1.00  | 1.00       |        |
| <input checked="" type="checkbox"/> | G9  |             | Unknown     | 1.00  | 1.00       |        |
| <input checked="" type="checkbox"/> | G10 |             | Unknown     | 1.00  | 1.00       |        |
| <input checked="" type="checkbox"/> | G11 |             | Unknown     | 1.00  | 1.00       |        |
| <input checked="" type="checkbox"/> | G12 |             | Unknown     | 1.00  | 1.00       |        |
| <input checked="" type="checkbox"/> | H1  |             | Unknown     | 1.00  | 1.00       |        |
| <input checked="" type="checkbox"/> | H2  |             | Unknown     | 1.00  | 1.00       |        |
| <input checked="" type="checkbox"/> | H3  |             | Unknown     | 1.00  | 1.00       |        |
| <input checked="" type="checkbox"/> | H4  |             | Unknown     | 1.00  | 1.00       |        |
| <input checked="" type="checkbox"/> | H5  |             | Unknown     | 1.00  | 1.00       |        |
| <input checked="" type="checkbox"/> | H6  |             | Unknown     | 1.00  | 1.00       |        |
| <input checked="" type="checkbox"/> | H7  |             | Unknown     | 1.00  | 1.00       |        |
| <input checked="" type="checkbox"/> | H8  |             | Unknown     | 1.00  | 1.00       |        |
| <input checked="" type="checkbox"/> | H9  |             | Unknown     | 1.00  | 1.00       |        |
| <input checked="" type="checkbox"/> | H10 |             | Unknown     | 1.00  | 1.00       |        |
| <input checked="" type="checkbox"/> | H11 |             | Unknown     | 1.00  | 1.00       |        |
| <input checked="" type="checkbox"/> | H12 |             | Unknown     | 1.00  | 1.00       |        |

### Melting Curves

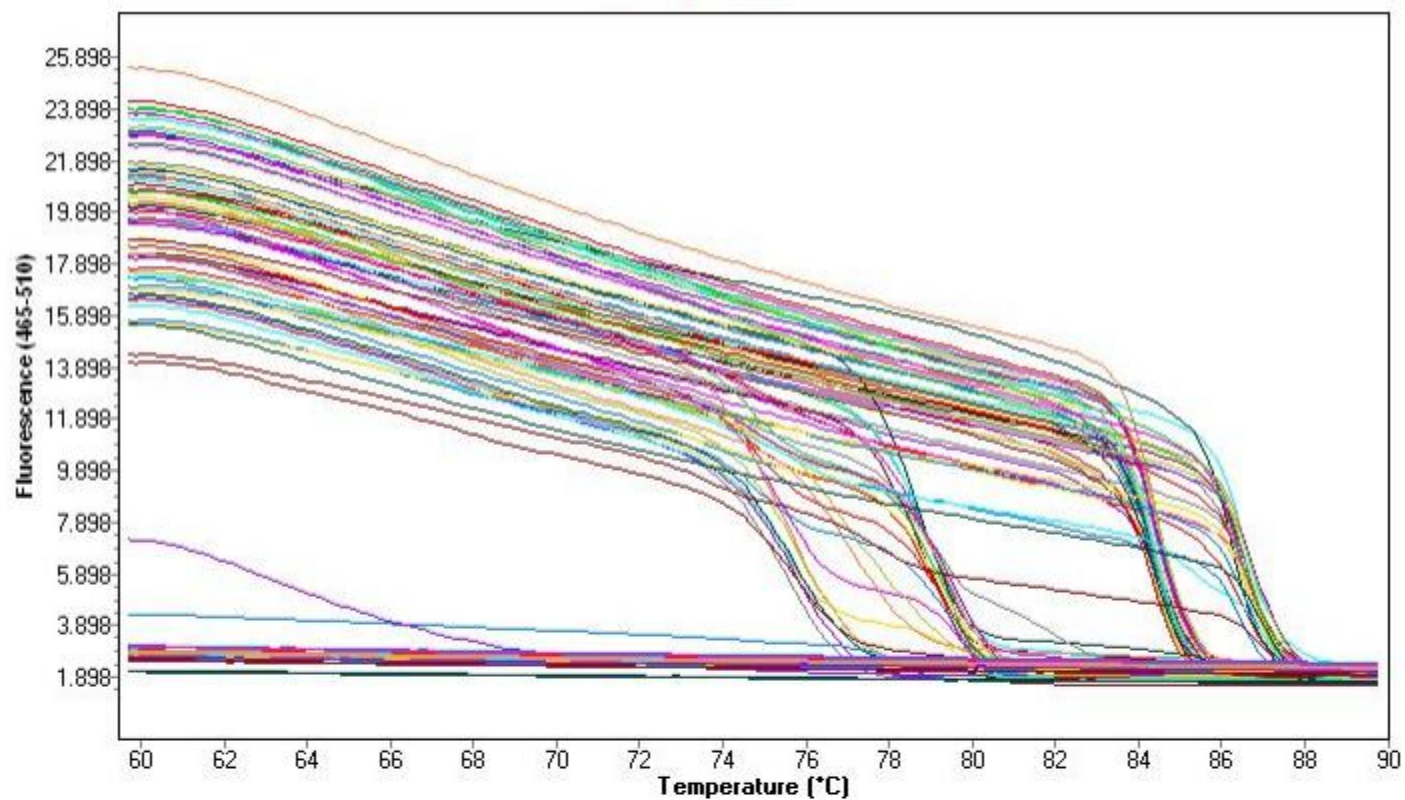

### Melting Peaks

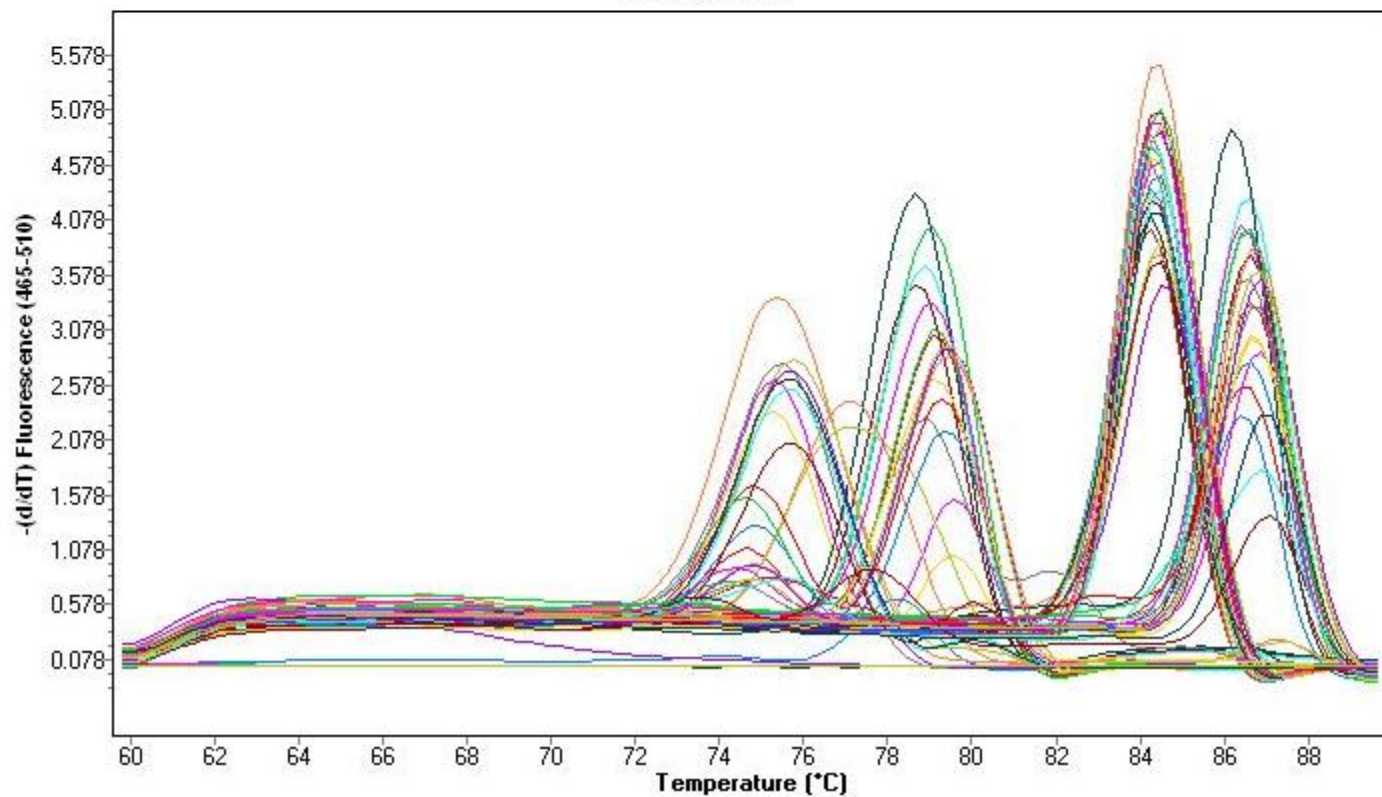

### Analysis Notes

## Tm Calling for All Samples (Tm Calling)

### Settings

|                |             |                    |          |
|----------------|-------------|--------------------|----------|
| Channel        | 465-510     | Color Compensation | Off      |
| Program        | Program     |                    |          |
| Show Shoulders | False       | Chemistry          | HybProbe |
|                |             | Max Peaks          | 2        |
| Subset Name    | All Samples |                    |          |

### Results

| Inc                                 | Pos | Sample Name | Peak 1 |       |       |        | Peak 2 |      |       |        | Status |
|-------------------------------------|-----|-------------|--------|-------|-------|--------|--------|------|-------|--------|--------|
|                                     |     |             | Tm     | Area  | Width | Height | Tm     | Area | Width | Height |        |
| <input checked="" type="checkbox"/> | A1  | GAPDH 1     | 84.48  | 10.91 | 2.32  | 4.71   |        |      |       |        |        |
| <input checked="" type="checkbox"/> | A2  | GAPDH 1     | 84.31  | 9.01  | 2.16  | 4.16   |        |      |       |        |        |
| <input checked="" type="checkbox"/> | A3  | GAPDH 1     | 84.38  | 11.55 | 2.33  | 4.96   |        |      |       |        |        |
| <input checked="" type="checkbox"/> | A4  | GAPDH 2     | 84.47  | 10.42 | 2.18  | 4.78   |        |      |       |        |        |
| <input checked="" type="checkbox"/> | A5  | GAPDH 2     | 84.27  | 11.30 | 2.34  | 4.84   |        |      |       |        |        |
| <input checked="" type="checkbox"/> | A6  | GAPDH 2     | 84.33  | 10.51 | 2.33  | 4.51   |        |      |       |        |        |
| <input checked="" type="checkbox"/> | A7  | GAPDH 3     | 84.41  | 9.85  | 2.24  | 4.39   |        |      |       |        |        |
| <input checked="" type="checkbox"/> | A8  | GAPDH 3     | 84.55  | 9.89  | 2.22  | 4.46   |        |      |       |        |        |
| <input checked="" type="checkbox"/> | A9  | GAPDH 3     | 84.48  | 9.49  | 2.24  | 4.23   |        |      |       |        |        |
| <input checked="" type="checkbox"/> | A10 | GAPDH 4     | 84.49  | 9.19  | 2.31  | 3.98   |        |      |       |        |        |
| <input checked="" type="checkbox"/> | A11 | GAPDH 4     | 84.64  | 8.22  | 2.25  | 3.66   |        |      |       |        |        |
| <input checked="" type="checkbox"/> | A12 | GAPDH 4     | 84.56  | 9.50  | 2.33  | 4.08   |        |      |       |        |        |
| <input checked="" type="checkbox"/> | B1  | FCER1A 1    | 78.23  | 1.37  | 2.10  | 0.65   |        |      |       |        |        |
| <input checked="" type="checkbox"/> | B2  | FCER1A 1    | 74.57  | 1.57  | 2.03  | 0.77   | 79.20  | 7.74 | 2.47  | 3.14   |        |
| <input checked="" type="checkbox"/> | B3  | FCER1A 1    | 79.05  | 10.67 | 2.57  | 4.15   |        |      |       |        |        |
| <input checked="" type="checkbox"/> | B4  | FCER1A 2    | 75.38  | 6.58  | 2.45  | 2.68   | 79.72  | 3.97 | 2.32  | 1.71   |        |
| <input checked="" type="checkbox"/> | B5  | FCER1A 2    | 75.59  | 8.80  | 3.10  | 2.84   |        |      |       |        |        |
| <input checked="" type="checkbox"/> | B6  | FCER1A 2    | 75.34  | 6.02  | 2.52  | 2.39   | 79.67  | 2.57 | 2.28  | 1.13   |        |
| <input checked="" type="checkbox"/> | B7  | FCER1A 3    | 78.70  | 8.66  | 2.47  | 3.50   |        |      |       |        |        |
| <input checked="" type="checkbox"/> | B8  | FCER1A 3    | 78.94  | 9.52  | 2.53  | 3.76   |        |      |       |        |        |
| <input checked="" type="checkbox"/> | B9  | FCER1A 3    | 78.67  | 10.47 | 2.42  | 4.32   |        |      |       |        |        |
| <input checked="" type="checkbox"/> | B10 | FCER1A 4    | 75.60  | 11.12 | 3.27  | 3.40   |        |      |       |        |        |
| <input checked="" type="checkbox"/> | B11 | FCER1A 4    | 75.85  | 8.41  | 3.04  | 2.77   |        |      |       |        |        |
| <input checked="" type="checkbox"/> | B12 | FCER1A 4    | 75.83  | 9.82  | 3.48  | 2.82   |        |      |       |        |        |
| <input checked="" type="checkbox"/> | C1  | RGS1 1      | 86.64  | 3.83  | 1.73  | 2.22   |        |      |       |        |        |
| <input checked="" type="checkbox"/> | C2  | RGS1 1      | 75.41  | 1.10  | 2.68  | 0.41   | 86.61  | 7.83 | 2.85  | 2.75   |        |
| <input checked="" type="checkbox"/> | C3  | RGS1 1      | 86.64  | 9.94  | 2.38  | 4.18   |        |      |       |        |        |
| <input checked="" type="checkbox"/> | C4  | RGS1 2      |        |       |       |        |        |      |       |        |        |
| <input checked="" type="checkbox"/> | C5  | RGS1 2      |        |       |       |        |        |      |       |        |        |

## Results

| Inc                                 | Pos | Sample Name | Peak 1 |       |       |        | Peak 2 |      |       |        | Status |
|-------------------------------------|-----|-------------|--------|-------|-------|--------|--------|------|-------|--------|--------|
|                                     |     |             | Tm     | Area  | Width | Height | Tm     | Area | Width | Height |        |
| <input checked="" type="checkbox"/> | C6  | RGS1 2      |        |       |       |        |        |      |       |        |        |
| <input checked="" type="checkbox"/> | C7  | RGS1 3      |        |       |       |        |        |      |       |        |        |
| <input checked="" type="checkbox"/> | C8  | RGS1 3      | 86.64  | 9.53  | 2.20  | 4.33   |        |      |       |        |        |
| <input checked="" type="checkbox"/> | C9  | RGS1 3      | 86.27  | 12.38 | 2.39  | 5.19   |        |      |       |        |        |
| <input checked="" type="checkbox"/> | C10 | RGS1 4      | 77.14  | 8.09  | 3.34  | 2.42   |        |      |       |        |        |
| <input checked="" type="checkbox"/> | C11 | RGS1 4      |        |       |       |        |        |      |       |        |        |
| <input checked="" type="checkbox"/> | C12 | RGS1 4      | 77.41  | 9.01  | 3.96  | 2.28   |        |      |       |        |        |
| <input checked="" type="checkbox"/> | D1  | GAPDH 5     | 84.40  | 10.31 | 2.28  | 4.53   |        |      |       |        |        |
| <input checked="" type="checkbox"/> | D2  | GAPDH 5     | 84.50  | 12.09 | 2.32  | 5.22   |        |      |       |        |        |
| <input checked="" type="checkbox"/> | D3  | GAPDH 5     | 84.60  | 11.85 | 2.21  | 5.36   |        |      |       |        |        |
| <input checked="" type="checkbox"/> | D4  | GAPDH 7     | 84.47  | 11.57 | 2.27  | 5.10   |        |      |       |        |        |
| <input checked="" type="checkbox"/> | D5  | GAPDH 7     | 84.38  | 10.58 | 2.14  | 4.94   |        |      |       |        |        |
| <input checked="" type="checkbox"/> | D6  | GAPDH 7     | 84.43  | 10.80 | 2.30  | 4.69   |        |      |       |        |        |
| <input checked="" type="checkbox"/> | D7  | GAPDH 11    | 84.49  | 8.93  | 2.30  | 3.89   |        |      |       |        |        |
| <input checked="" type="checkbox"/> | D8  | GAPDH 11    | 84.38  | 11.72 | 2.36  | 4.97   |        |      |       |        |        |
| <input checked="" type="checkbox"/> | D9  | GAPDH 11    | 84.30  | 9.34  | 2.27  | 4.12   |        |      |       |        |        |
| <input checked="" type="checkbox"/> | D10 | GAPDH 14    | 84.50  | 12.93 | 2.24  | 5.76   |        |      |       |        |        |
| <input checked="" type="checkbox"/> | D11 | GAPDH 14    | 84.56  | 11.60 | 2.27  | 5.11   |        |      |       |        |        |
| <input checked="" type="checkbox"/> | D12 | GAPDH 14    | 84.64  | 11.92 | 2.31  | 5.15   |        |      |       |        |        |
| <input checked="" type="checkbox"/> | E1  | FCER1A 5    | 74.87  | 2.25  | 2.08  | 1.08   | 79.45  | 5.67 | 2.53  | 2.24   |        |
| <input checked="" type="checkbox"/> | E2  | FCER1A 5    | 74.86  | 2.99  | 2.13  | 1.40   | 79.36  | 6.41 | 2.53  | 2.54   |        |
| <input checked="" type="checkbox"/> | E3  | FCER1A 5    | 74.62  | 2.46  | 1.99  | 1.23   | 79.21  | 8.07 | 2.54  | 3.18   |        |
| <input checked="" type="checkbox"/> | E4  | FCER1A 7    | 74.28  | 0.93  | 1.80  | 0.52   | 79.07  | 8.75 | 2.61  | 3.36   |        |
| <input checked="" type="checkbox"/> | E5  | FCER1A 7    | 78.96  | 5.67  | 2.58  | 2.20   | 82.16  | 2.04 | 2.49  | 0.82   |        |
| <input checked="" type="checkbox"/> | E6  | FCER1A 7    | 79.19  | 7.03  | 2.65  | 2.65   |        |      |       |        |        |
| <input checked="" type="checkbox"/> | E7  | FCER1A 11   | 75.72  | 6.86  | 3.55  | 1.93   |        |      |       |        |        |
| <input checked="" type="checkbox"/> | E8  | FCER1A 11   | 75.75  | 7.11  | 2.91  | 2.44   |        |      |       |        |        |
| <input checked="" type="checkbox"/> | E9  | FCER1A 11   | 75.72  | 7.59  | 3.00  | 2.53   |        |      |       |        |        |
| <input checked="" type="checkbox"/> | E10 | FCER1A 14   | 74.72  | 1.04  | 1.73  | 0.60   | 79.55  | 7.72 | 2.64  | 2.92   |        |
| <input checked="" type="checkbox"/> | E11 | FCER1A 14   | 74.75  | 0.97  | 1.65  | 0.58   | 79.53  | 7.68 | 2.56  | 3.00   |        |
| <input checked="" type="checkbox"/> | E12 | FCER1A 14   | 74.67  | 0.79  | 1.65  | 0.48   | 79.49  | 7.89 | 2.60  | 3.03   |        |
| <input checked="" type="checkbox"/> | F1  | RGS1 5      |        |       |       |        |        |      |       |        |        |
| <input checked="" type="checkbox"/> | F2  | RGS1 5      |        |       |       |        |        |      |       |        |        |
| <input checked="" type="checkbox"/> | F3  | RGS1 5      |        |       |       |        |        |      |       |        |        |
| <input checked="" type="checkbox"/> | F4  | RGS1 7      | 86.54  | 9.56  | 2.30  | 4.15   |        |      |       |        |        |
| <input checked="" type="checkbox"/> | F5  | RGS1 7      | 86.65  | 8.54  | 2.36  | 3.62   |        |      |       |        |        |



## Results

| Inc                                 | Pos | Sample Name | Peak 1 |      |       |        | Peak 2 |      |       |        | Status |
|-------------------------------------|-----|-------------|--------|------|-------|--------|--------|------|-------|--------|--------|
|                                     |     |             | Tm     | Area | Width | Height | Tm     | Area | Width | Height |        |
| <input checked="" type="checkbox"/> | F6  | RGS1 7      |        |      |       |        |        |      |       |        |        |
| <input checked="" type="checkbox"/> | F7  | RGS1 11     | 76.90  | 2.26 | 4.71  | 0.48   |        |      |       |        |        |
| <input checked="" type="checkbox"/> | F8  | RGS1 11     | 74.99  | 1.06 | 2.23  | 0.47   |        |      |       |        |        |
| <input checked="" type="checkbox"/> | F9  | RGS1 11     |        |      |       |        |        |      |       |        |        |
| <input checked="" type="checkbox"/> | F10 | RGS1 14     |        |      |       |        |        |      |       |        |        |
| <input checked="" type="checkbox"/> | F11 | RGS1 14     |        |      |       |        |        |      |       |        |        |
| <input checked="" type="checkbox"/> | F12 | RGS1 14     |        |      |       |        |        |      |       |        |        |
| <input checked="" type="checkbox"/> | G1  |             |        |      |       |        |        |      |       |        |        |
| <input checked="" type="checkbox"/> | G2  |             |        |      |       |        |        |      |       |        |        |
| <input checked="" type="checkbox"/> | G3  |             |        |      |       |        |        |      |       |        |        |
| <input checked="" type="checkbox"/> | G4  |             |        |      |       |        |        |      |       |        |        |
| <input checked="" type="checkbox"/> | G5  |             |        |      |       |        |        |      |       |        |        |
| <input checked="" type="checkbox"/> | G6  |             |        |      |       |        |        |      |       |        |        |
| <input checked="" type="checkbox"/> | G7  |             |        |      |       |        |        |      |       |        |        |
| <input checked="" type="checkbox"/> | G8  |             |        |      |       |        |        |      |       |        |        |
| <input checked="" type="checkbox"/> | G9  |             |        |      |       |        |        |      |       |        |        |
| <input checked="" type="checkbox"/> | G10 |             |        |      |       |        |        |      |       |        |        |
| <input checked="" type="checkbox"/> | G11 |             |        |      |       |        |        |      |       |        |        |
| <input checked="" type="checkbox"/> | G12 |             |        |      |       |        |        |      |       |        |        |
| <input checked="" type="checkbox"/> | H1  |             |        |      |       |        |        |      |       |        |        |
| <input checked="" type="checkbox"/> | H2  |             |        |      |       |        |        |      |       |        |        |
| <input checked="" type="checkbox"/> | H3  |             |        |      |       |        |        |      |       |        |        |
| <input checked="" type="checkbox"/> | H4  |             |        |      |       |        |        |      |       |        |        |
| <input checked="" type="checkbox"/> | H5  |             |        |      |       |        |        |      |       |        |        |
| <input checked="" type="checkbox"/> | H6  |             |        |      |       |        |        |      |       |        |        |
| <input checked="" type="checkbox"/> | H7  |             |        |      |       |        |        |      |       |        |        |
| <input checked="" type="checkbox"/> | H8  |             |        |      |       |        |        |      |       |        |        |
| <input checked="" type="checkbox"/> | H9  |             |        |      |       |        |        |      |       |        |        |
| <input checked="" type="checkbox"/> | H10 |             |        |      |       |        |        |      |       |        |        |
| <input checked="" type="checkbox"/> | H11 |             |        |      |       |        |        |      |       |        |        |
| <input checked="" type="checkbox"/> | H12 |             |        |      |       |        |        |      |       |        |        |

### Melting Curves



### Melting Peaks

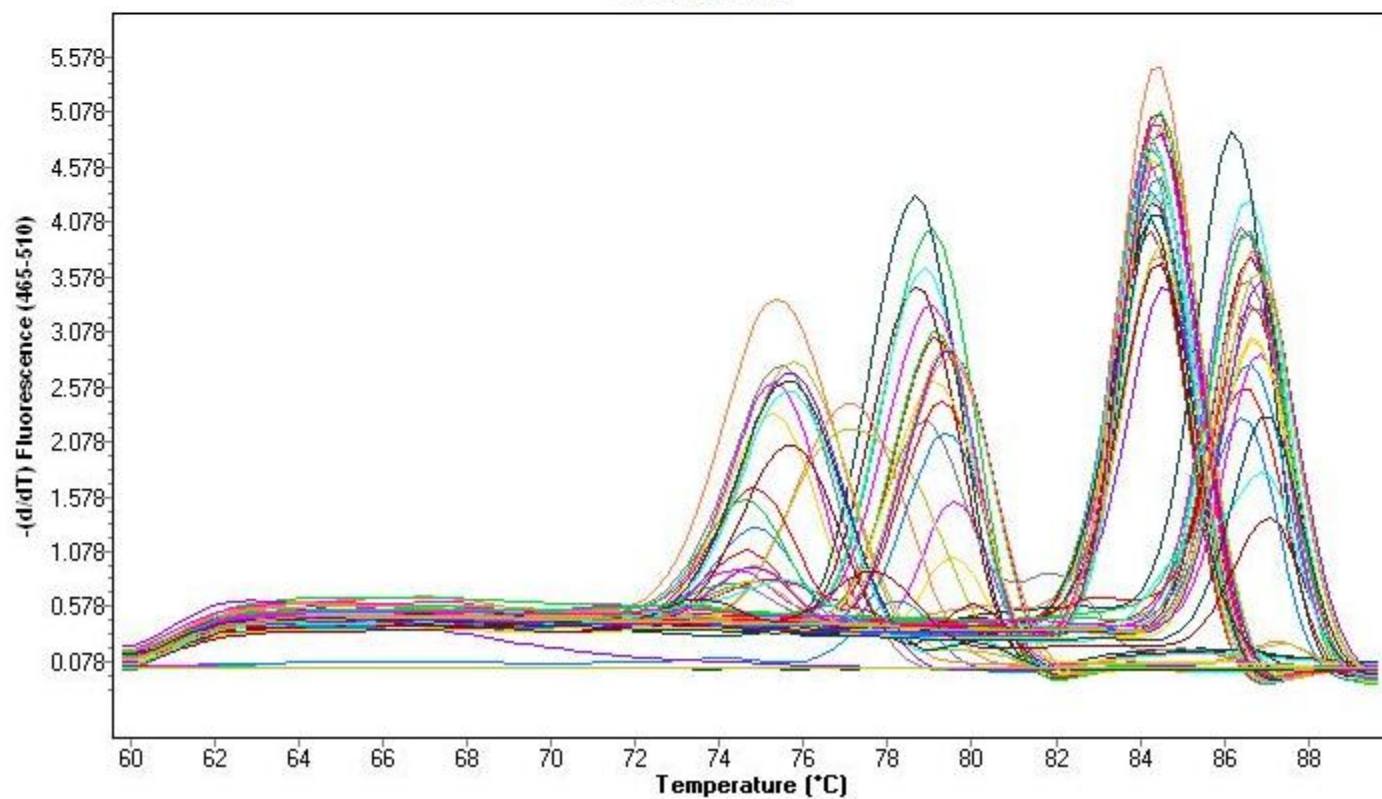

### Analysis Notes
