# Supplementary material for: Exploring differential gene expression and biomarker potential in systemic lupus erythematosus: a retrospective study
Source: PeerJ journal article supplement (doi:10.7717/peerj.19891), 2025-09-08
Supplement: qPCR.zip [file qPCR.zip]

# cobas® 4800 User Defined Workflow (UDF)

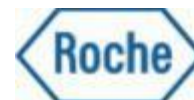

## 20241222xj plate2

### Experiment

|               |                       |                    |                                    |
|---------------|-----------------------|--------------------|------------------------------------|
| Creation Date | 12/22/2024 5:28:20 PM | Last Modified Date | 12/22/2024 6:42:58 PM              |
| Operator      | System Admin          | Owner              | System Admin                       |
| Start Time    | 12/22/2024 5:28:47 PM | End Time           | 12/22/2024 6:27:40 PM              |
| Run State     | Completed             | Software Version   | LCS480 1.5.1.62 SP3 - UDF 2.1.0.26 |
| Macro         |                       | Macro Owner        |                                    |
| Macro Status  |                       |                    |                                    |
| Templates     | gongying              | Plate ID           |                                    |
| Test ID       |                       | Lot ID             |                                    |
| Color Comp ID |                       |                    |                                    |
| Run Notes     |                       |                    |                                    |

### Programs

|              |         |               |      |
|--------------|---------|---------------|------|
| Program Name | Program |               |      |
| Cycles       | 1       | Analysis Mode | None |

| Target (°C) | Acquisition Mode | Hold (hh:mm:ss) | Ramp Rate (°C/s) | Acquisitions (per °C) | Sec Target (°C) | Step size (°C) | Step Delay (cycles) |
|-------------|------------------|-----------------|------------------|-----------------------|-----------------|----------------|---------------------|
| 95          | None             | 00:00:30        | 4.40             |                       | 0               | 0              | 0                   |

|              |         |               |                |
|--------------|---------|---------------|----------------|
| Program Name | Program |               |                |
| Cycles       | 40      | Analysis Mode | Quantification |

| Target (°C) | Acquisition Mode | Hold (hh:mm:ss) | Ramp Rate (°C/s) | Acquisitions (per °C) | Sec Target (°C) | Step size (°C) | Step Delay (cycles) |
|-------------|------------------|-----------------|------------------|-----------------------|-----------------|----------------|---------------------|
| 95          | None             | 00:00:15        | 4.40             |                       | 0               | 0              | 0                   |
| 60          | Single           | 00:00:30        | 2.20             |                       | 0               | 0              | 0                   |

|              |         |               |                |
|--------------|---------|---------------|----------------|
| Program Name | Program |               |                |
| Cycles       | 1       | Analysis Mode | Melting Curves |

| Target (°C) | Acquisition Mode | Hold (hh:mm:ss) | Ramp Rate (°C/s) | Acquisitions (per °C) | Sec Target (°C) | Step size (°C) | Step Delay (cycles) |
|-------------|------------------|-----------------|------------------|-----------------------|-----------------|----------------|---------------------|
| 95          | None             | 00:01:00        | 4.40             |                       | 0               | 0              | 0                   |
| 60          | None             | 00:00:30        | 2.20             |                       | 0               | 0              | 0                   |
| 90          | Continuous       |                 | 0.11             | 5                     | 0               | 0              | 0                   |

|              |         |               |      |
|--------------|---------|---------------|------|
| Program Name | Program |               |      |
| Cycles       | 1       | Analysis Mode | None |

| Target (°C) | Acquisition Mode | Hold (hh:mm:ss) | Ramp Rate (°C/s) | Acquisitions (per °C) | Sec Target (°C) | Step size (°C) | Step Delay (cycles) |
|-------------|------------------|-----------------|------------------|-----------------------|-----------------|----------------|---------------------|
|-------------|------------------|-----------------|------------------|-----------------------|-----------------|----------------|---------------------|

| Target (°C) | Acquisition Mode | Hold (hh:mm:ss) | Ramp Rate (°C/s) | Acquisitions (per °C) | Sec Target (°C) | Step size (°C) | Step Delay (cycles) |
|-------------|------------------|-----------------|------------------|-----------------------|-----------------|----------------|---------------------|
| 40          | None             | 00:00:30        | 2.20             |                       | 0               | 0              | 0                   |

## Samples

| Sample Count | 96          |    |          |              |  |
|--------------|-------------|----|----------|--------------|--|
| Subset       | All Samples |    |          |              |  |
| Pos          | Name        | ID | Repl. Of | Sample Notes |  |
| A1           | GAPDH 102   |    |          |              |  |
| A2           | GAPDH 102   |    |          |              |  |
| A3           | GAPDH 102   |    |          |              |  |
| A4           | GAPDH 107   |    |          |              |  |
| A5           | GAPDH 107   |    |          |              |  |
| A6           | GAPDH 107   |    |          |              |  |
| A7           | GAPDH 110   |    |          |              |  |
| A8           | GAPDH 110   |    |          |              |  |
| A9           | GAPDH 110   |    |          |              |  |
| A10          | GAPDH 113   |    |          |              |  |
| A11          | GAPDH 113   |    |          |              |  |
| A12          | GAPDH 113   |    |          |              |  |
| B1           | FCER1A 102  |    |          |              |  |
| B2           | FCER1A 102  |    |          |              |  |
| B3           | FCER1A 102  |    |          |              |  |
| B4           | FCER1A 107  |    |          |              |  |
| B5           | FCER1A 107  |    |          |              |  |
| B6           | FCER1A 107  |    |          |              |  |
| B7           | FCER1A 110  |    |          |              |  |
| B8           | FCER1A 110  |    |          |              |  |
| B9           | FCER1A 110  |    |          |              |  |
| B10          | FCER1A 113  |    |          |              |  |
| B11          | FCER1A 113  |    |          |              |  |
| B12          | FCER1A 113  |    |          |              |  |
| C1           | GAPDH 115   |    |          |              |  |
| C2           | GAPDH 115   |    |          |              |  |
| C3           | GAPDH 115   |    |          |              |  |
| C4           | GAPDH 117   |    |          |              |  |
| C5           | GAPDH 117   |    |          |              |  |
| C6           | GAPDH 117   |    |          |              |  |
| C7           | GAPDH 119   |    |          |              |  |
| C8           | GAPDH 119   |    |          |              |  |
| C9           | GAPDH 119   |    |          |              |  |
| C10          | GAPDH 120   |    |          |              |  |
| C11          | GAPDH 120   |    |          |              |  |
| C12          | GAPDH 120   |    |          |              |  |

## Samples

| Sample Count |            | 96          |          |              |
|--------------|------------|-------------|----------|--------------|
| Subset       |            | All Samples |          |              |
| Pos          | Name       | ID          | Repl. Of | Sample Notes |
| D1           | FCER1A 115 |             |          |              |
| D2           | FCER1A 115 |             |          |              |
| D3           | FCER1A 115 |             |          |              |
| D4           | FCER1A 117 |             |          |              |
| D5           | FCER1A 117 |             |          |              |
| D6           | FCER1A 117 |             |          |              |
| D7           | FCER1A 119 |             |          |              |
| D8           | FCER1A 119 |             |          |              |
| D9           | FCER1A 119 |             |          |              |
| D10          | FCER1A 120 |             |          |              |
| D11          | FCER1A 120 |             |          |              |
| D12          | FCER1A 120 |             |          |              |
| E1           |            |             |          |              |
| E2           |            |             |          |              |
| E3           |            |             |          |              |
| E4           |            |             |          |              |
| E5           |            |             |          |              |
| E6           |            |             |          |              |
| E7           |            |             |          |              |
| E8           |            |             |          |              |
| E9           |            |             |          |              |
| E10          |            |             |          |              |
| E11          |            |             |          |              |
| E12          |            |             |          |              |
| F1           |            |             |          |              |
| F2           |            |             |          |              |
| F3           |            |             |          |              |
| F4           |            |             |          |              |
| F5           |            |             |          |              |
| F6           |            |             |          |              |
| F7           |            |             |          |              |
| F8           |            |             |          |              |
| F9           |            |             |          |              |
| F10          |            |             |          |              |
| F11          |            |             |          |              |
| F12          |            |             |          |              |
| G1           |            |             |          |              |
| G2           |            |             |          |              |
| G3           |            |             |          |              |

Samples

|              |             |    |          |              |  |
|--------------|-------------|----|----------|--------------|--|
| Sample Count | 96          |    |          |              |  |
| Subset       | All Samples |    |          |              |  |
| Pos          | Name        | ID | Repl. Of | Sample Notes |  |
| G4           |             |    |          |              |  |
| G5           |             |    |          |              |  |
| G6           |             |    |          |              |  |
| G7           |             |    |          |              |  |
| G8           |             |    |          |              |  |
| G9           |             |    |          |              |  |
| G10          |             |    |          |              |  |
| G11          |             |    |          |              |  |
| G12          |             |    |          |              |  |
| H1           |             |    |          |              |  |
| H2           |             |    |          |              |  |
| H3           |             |    |          |              |  |
| H4           |             |    |          |              |  |
| H5           |             |    |          |              |  |
| H6           |             |    |          |              |  |
| H7           |             |    |          |              |  |
| H8           |             |    |          |              |  |
| H9           |             |    |          |              |  |
| H10          |             |    |          |              |  |
| H11          |             |    |          |              |  |
| H12          |             |    |          |              |  |

Instrument

|      |      |               |       |
|------|------|---------------|-------|
| Name | Z480 | Serial Number | 56319 |
|------|------|---------------|-------|

Revision History

|          |      |      |        |
|----------|------|------|--------|
| Revision | Date | User | Reason |
|          |      |      |        |

Abs Quant/2nd Derivative Max for All Samples (Abs Quant/2nd Derivative Max)

Settings

|                    |                 |  |       |  |
|--------------------|-----------------|--|-------|--|
| Channel            | 465-510         |  |       |  |
| Color Compensation | Off             |  |       |  |
| Program            | Program         |  | Units |  |
| Mode               | High Confidence |  |       |  |

|             |             |
|-------------|-------------|
| Subset Name | All Samples |
|-------------|-------------|

Results

|     |     |      |      |    |               |          |        |
|-----|-----|------|------|----|---------------|----------|--------|
| Inc | Pos | Name | Type | CP | Concentration | Standard | Status |
|-----|-----|------|------|----|---------------|----------|--------|

## Results

| Inc                                 | Pos | Name       | Type    | CP    | Concentration | Standard | Status |
|-------------------------------------|-----|------------|---------|-------|---------------|----------|--------|
| <input checked="" type="checkbox"/> | A1  | GAPDH 102  | Unknown | 24.09 |               |          |        |
| <input checked="" type="checkbox"/> | A2  | GAPDH 102  | Unknown | 24.30 |               |          |        |
| <input checked="" type="checkbox"/> | A3  | GAPDH 102  | Unknown | 24.18 |               |          |        |
| <input checked="" type="checkbox"/> | A4  | GAPDH 107  | Unknown | 23.78 |               |          |        |
| <input checked="" type="checkbox"/> | A5  | GAPDH 107  | Unknown | 23.74 |               |          |        |
| <input checked="" type="checkbox"/> | A6  | GAPDH 107  | Unknown | 23.77 |               |          |        |
| <input checked="" type="checkbox"/> | A7  | GAPDH 110  | Unknown | 22.98 |               |          |        |
| <input checked="" type="checkbox"/> | A8  | GAPDH 110  | Unknown | 22.83 |               |          |        |
| <input checked="" type="checkbox"/> | A9  | GAPDH 110  | Unknown | 22.95 |               |          |        |
| <input checked="" type="checkbox"/> | A10 | GAPDH 113  | Unknown | 27.28 |               |          |        |
| <input checked="" type="checkbox"/> | A11 | GAPDH 113  | Unknown | 27.18 |               |          |        |
| <input checked="" type="checkbox"/> | A12 | GAPDH 113  | Unknown | 27.71 |               |          |        |
| <input checked="" type="checkbox"/> | B1  | FCER1A 102 | Unknown | 30.79 |               |          |        |
| <input checked="" type="checkbox"/> | B2  | FCER1A 102 | Unknown | 30.75 |               |          |        |
| <input checked="" type="checkbox"/> | B3  | FCER1A 102 | Unknown | 30.36 |               |          |        |
| <input checked="" type="checkbox"/> | B4  | FCER1A 107 | Unknown | 29.05 |               |          |        |
| <input checked="" type="checkbox"/> | B5  | FCER1A 107 | Unknown | 28.92 |               |          |        |
| <input checked="" type="checkbox"/> | B6  | FCER1A 107 | Unknown | 28.96 |               |          |        |
| <input checked="" type="checkbox"/> | B7  | FCER1A 110 | Unknown | 30.57 |               |          |        |
| <input checked="" type="checkbox"/> | B8  | FCER1A 110 | Unknown | 30.16 |               |          |        |
| <input checked="" type="checkbox"/> | B9  | FCER1A 110 | Unknown | 29.87 |               |          |        |
| <input checked="" type="checkbox"/> | B10 | FCER1A 113 | Unknown | 26.43 |               |          |        |
| <input checked="" type="checkbox"/> | B11 | FCER1A 113 | Unknown | 30.78 |               |          |        |
| <input checked="" type="checkbox"/> | B12 | FCER1A 113 | Unknown | 31.87 |               |          |        |
| <input checked="" type="checkbox"/> | C1  | GAPDH 115  | Unknown | 23.28 |               |          |        |
| <input checked="" type="checkbox"/> | C2  | GAPDH 115  | Unknown | 23.52 |               |          |        |
| <input checked="" type="checkbox"/> | C3  | GAPDH 115  | Unknown | 23.31 |               |          |        |
| <input checked="" type="checkbox"/> | C4  | GAPDH 117  | Unknown | 22.79 |               |          |        |
| <input checked="" type="checkbox"/> | C5  | GAPDH 117  | Unknown | 22.88 |               |          |        |
| <input checked="" type="checkbox"/> | C6  | GAPDH 117  | Unknown | 22.75 |               |          |        |
| <input checked="" type="checkbox"/> | C7  | GAPDH 119  | Unknown | 23.79 |               |          |        |
| <input checked="" type="checkbox"/> | C8  | GAPDH 119  | Unknown | 23.66 |               |          |        |
| <input checked="" type="checkbox"/> | C9  | GAPDH 119  | Unknown | 23.55 |               |          |        |
| <input checked="" type="checkbox"/> | C10 | GAPDH 120  | Unknown | 24.54 |               |          |        |
| <input checked="" type="checkbox"/> | C11 | GAPDH 120  | Unknown | 24.34 |               |          |        |
| <input checked="" type="checkbox"/> | C12 | GAPDH 120  | Unknown | 24.44 |               |          |        |
| <input checked="" type="checkbox"/> | D1  | FCER1A 115 | Unknown | 29.64 |               |          |        |

## Results

| Inc                                 | Pos | Name       | Type    | CP    | Concentration | Standard | Status |
|-------------------------------------|-----|------------|---------|-------|---------------|----------|--------|
| <input checked="" type="checkbox"/> | D2  | FCER1A 115 | Unknown | 29.75 |               |          |        |
| <input checked="" type="checkbox"/> | D3  | FCER1A 115 | Unknown | 28.10 |               |          |        |
| <input checked="" type="checkbox"/> | D4  | FCER1A 117 | Unknown | 28.86 |               |          |        |
| <input checked="" type="checkbox"/> | D5  | FCER1A 117 | Unknown | 28.72 |               |          |        |
| <input checked="" type="checkbox"/> | D6  | FCER1A 117 | Unknown | 28.07 |               |          |        |
| <input checked="" type="checkbox"/> | D7  | FCER1A 119 | Unknown | 29.21 |               |          |        |
| <input checked="" type="checkbox"/> | D8  | FCER1A 119 | Unknown | 29.36 |               |          |        |
| <input checked="" type="checkbox"/> | D9  | FCER1A 119 | Unknown | 29.31 |               |          |        |
| <input checked="" type="checkbox"/> | D10 | FCER1A 120 | Unknown | 29.51 |               |          |        |
| <input checked="" type="checkbox"/> | D11 | FCER1A 120 | Unknown | 29.44 |               |          |        |
| <input checked="" type="checkbox"/> | D12 | FCER1A 120 | Unknown | 29.45 |               |          |        |
| <input checked="" type="checkbox"/> | E1  |            | Unknown |       |               |          |        |
| <input checked="" type="checkbox"/> | E2  |            | Unknown |       |               |          |        |
| <input checked="" type="checkbox"/> | E3  |            | Unknown |       |               |          |        |
| <input checked="" type="checkbox"/> | E4  |            | Unknown |       |               |          |        |
| <input checked="" type="checkbox"/> | E5  |            | Unknown |       |               |          |        |
| <input checked="" type="checkbox"/> | E6  |            | Unknown |       |               |          |        |
| <input checked="" type="checkbox"/> | E7  |            | Unknown |       |               |          |        |
| <input checked="" type="checkbox"/> | E8  |            | Unknown |       |               |          |        |
| <input checked="" type="checkbox"/> | E9  |            | Unknown |       |               |          |        |
| <input checked="" type="checkbox"/> | E10 |            | Unknown |       |               |          |        |
| <input checked="" type="checkbox"/> | E11 |            | Unknown |       |               |          |        |
| <input checked="" type="checkbox"/> | E12 |            | Unknown |       |               |          |        |
| <input checked="" type="checkbox"/> | F1  |            | Unknown |       |               |          |        |
| <input checked="" type="checkbox"/> | F2  |            | Unknown |       |               |          |        |
| <input checked="" type="checkbox"/> | F3  |            | Unknown |       |               |          |        |
| <input checked="" type="checkbox"/> | F4  |            | Unknown |       |               |          |        |
| <input checked="" type="checkbox"/> | F5  |            | Unknown |       |               |          |        |
| <input checked="" type="checkbox"/> | F6  |            | Unknown |       |               |          |        |
| <input checked="" type="checkbox"/> | F7  |            | Unknown |       |               |          |        |
| <input checked="" type="checkbox"/> | F8  |            | Unknown |       |               |          |        |
| <input checked="" type="checkbox"/> | F9  |            | Unknown |       |               |          |        |
| <input checked="" type="checkbox"/> | F10 |            | Unknown |       |               |          |        |
| <input checked="" type="checkbox"/> | F11 |            | Unknown |       |               |          |        |
| <input checked="" type="checkbox"/> | F12 |            | Unknown |       |               |          |        |
| <input checked="" type="checkbox"/> | G1  |            | Unknown |       |               |          |        |
| <input checked="" type="checkbox"/> | G2  |            | Unknown |       |               |          |        |

---

**Results**

| Inc                                 | Pos | Name | Type    | CP | Concentration | Standard | Status |
|-------------------------------------|-----|------|---------|----|---------------|----------|--------|
| <input checked="" type="checkbox"/> | G3  |      | Unknown |    |               |          |        |
| <input checked="" type="checkbox"/> | G4  |      | Unknown |    |               |          |        |
| <input checked="" type="checkbox"/> | G5  |      | Unknown |    |               |          |        |
| <input checked="" type="checkbox"/> | G6  |      | Unknown |    |               |          |        |
| <input checked="" type="checkbox"/> | G7  |      | Unknown |    |               |          |        |
| <input checked="" type="checkbox"/> | G8  |      | Unknown |    |               |          |        |
| <input checked="" type="checkbox"/> | G9  |      | Unknown |    |               |          |        |
| <input checked="" type="checkbox"/> | G10 |      | Unknown |    |               |          |        |
| <input checked="" type="checkbox"/> | G11 |      | Unknown |    |               |          |        |
| <input checked="" type="checkbox"/> | G12 |      | Unknown |    |               |          |        |
| <input checked="" type="checkbox"/> | H1  |      | Unknown |    |               |          |        |
| <input checked="" type="checkbox"/> | H2  |      | Unknown |    |               |          |        |
| <input checked="" type="checkbox"/> | H3  |      | Unknown |    |               |          |        |
| <input checked="" type="checkbox"/> | H4  |      | Unknown |    |               |          |        |
| <input checked="" type="checkbox"/> | H5  |      | Unknown |    |               |          |        |
| <input checked="" type="checkbox"/> | H6  |      | Unknown |    |               |          |        |
| <input checked="" type="checkbox"/> | H7  |      | Unknown |    |               |          |        |
| <input checked="" type="checkbox"/> | H8  |      | Unknown |    |               |          |        |
| <input checked="" type="checkbox"/> | H9  |      | Unknown |    |               |          |        |
| <input checked="" type="checkbox"/> | H10 |      | Unknown |    |               |          |        |
| <input checked="" type="checkbox"/> | H11 |      | Unknown |    |               |          |        |
| <input checked="" type="checkbox"/> | H12 |      | Unknown |    |               |          |        |

### Amplification Curves

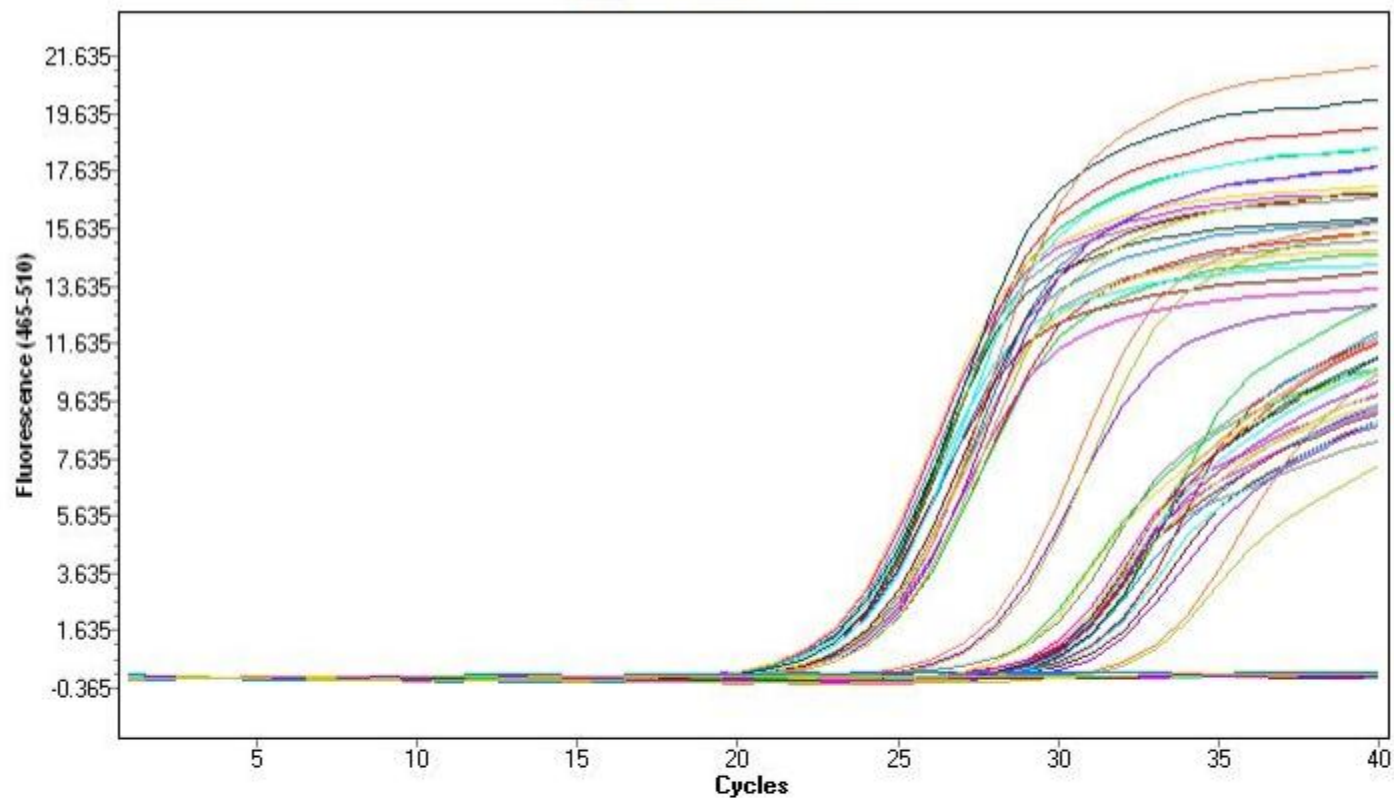

### Standard Curve

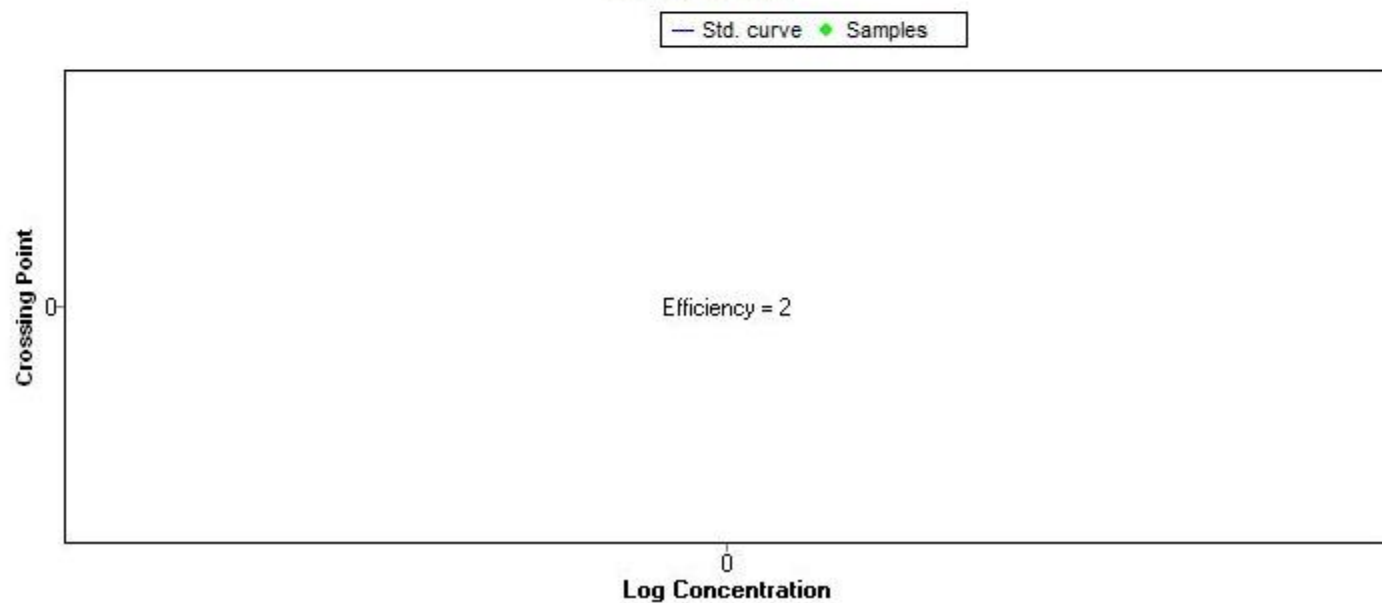

### Analysis Notes

**Abs Quant/Fit Points for All Samples (Abs Quant/Fit Points)**



## Settings

|                    |                       |                  |        |                    |         |  |
|--------------------|-----------------------|------------------|--------|--------------------|---------|--|
| Channel            | 465-510               |                  |        |                    |         |  |
| Color Compensation | Off                   |                  |        |                    |         |  |
| Standard Curve     | Set Efficiency (2.00) |                  |        |                    |         |  |
| Program            | Program               |                  |        |                    | Units   |  |
| First Cycle        | 1                     | Last Cycle       | 40     | Background         | 2-6     |  |
| Noiseband Method   | Auto                  | Noiseband        | 0.5250 | STD Dev Multiplier | 12.0000 |  |
| # of Fit Points    | 2                     | Threshold Method | Auto   | Threshold          | 0.5250  |  |

|             |             |
|-------------|-------------|
| Subset Name | All Samples |
|-------------|-------------|

## Results

| Inc                                 | Pos | Name       | Type    | CP    | Concentration | Standard | Status |
|-------------------------------------|-----|------------|---------|-------|---------------|----------|--------|
| <input checked="" type="checkbox"/> | A1  | GAPDH 102  | Unknown | 21.37 |               |          |        |
| <input checked="" type="checkbox"/> | A2  | GAPDH 102  | Unknown | 21.58 |               |          |        |
| <input checked="" type="checkbox"/> | A3  | GAPDH 102  | Unknown | 21.69 |               |          |        |
| <input checked="" type="checkbox"/> | A4  | GAPDH 107  | Unknown | 20.96 |               |          |        |
| <input checked="" type="checkbox"/> | A5  | GAPDH 107  | Unknown | 20.87 |               |          |        |
| <input checked="" type="checkbox"/> | A6  | GAPDH 107  | Unknown | 20.93 |               |          |        |
| <input checked="" type="checkbox"/> | A7  | GAPDH 110  | Unknown | 20.54 |               |          |        |
| <input checked="" type="checkbox"/> | A8  | GAPDH 110  | Unknown | 19.96 |               |          |        |
| <input checked="" type="checkbox"/> | A9  | GAPDH 110  | Unknown | 20.16 |               |          |        |
| <input checked="" type="checkbox"/> | A10 | GAPDH 113  | Unknown | 24.26 |               |          |        |
| <input checked="" type="checkbox"/> | A11 | GAPDH 113  | Unknown | 25.13 |               |          |        |
| <input checked="" type="checkbox"/> | A12 | GAPDH 113  | Unknown | 25.37 |               |          |        |
| <input checked="" type="checkbox"/> | B1  | FCER1A 102 | Unknown | 28.68 |               |          |        |
| <input checked="" type="checkbox"/> | B2  | FCER1A 102 | Unknown | 28.85 |               |          |        |
| <input checked="" type="checkbox"/> | B3  | FCER1A 102 | Unknown | 28.35 |               |          |        |
| <input checked="" type="checkbox"/> | B4  | FCER1A 107 | Unknown | 27.84 |               |          |        |
| <input checked="" type="checkbox"/> | B5  | FCER1A 107 | Unknown | 27.87 |               |          |        |
| <input checked="" type="checkbox"/> | B6  | FCER1A 107 | Unknown | 27.79 |               |          |        |
| <input checked="" type="checkbox"/> | B7  | FCER1A 110 | Unknown | 28.99 |               |          |        |
| <input checked="" type="checkbox"/> | B8  | FCER1A 110 | Unknown | 28.86 |               |          |        |
| <input checked="" type="checkbox"/> | B9  | FCER1A 110 | Unknown | 28.50 |               |          |        |
| <input checked="" type="checkbox"/> | B10 | FCER1A 113 | Unknown | 30.97 |               |          |        |
| <input checked="" type="checkbox"/> | B11 | FCER1A 113 | Unknown | 29.74 |               |          |        |
| <input checked="" type="checkbox"/> | B12 | FCER1A 113 | Unknown | 31.31 |               |          |        |
| <input checked="" type="checkbox"/> | C1  | GAPDH 115  | Unknown | 20.57 |               |          |        |
| <input checked="" type="checkbox"/> | C2  | GAPDH 115  | Unknown | 20.60 |               |          |        |
| <input checked="" type="checkbox"/> | C3  | GAPDH 115  | Unknown | 20.70 |               |          |        |

## Results

| Inc                                 | Pos | Name       | Type    | CP    | Concentration | Standard | Status |
|-------------------------------------|-----|------------|---------|-------|---------------|----------|--------|
| <input checked="" type="checkbox"/> | C4  | GAPDH 117  | Unknown | 19.94 |               |          |        |
| <input checked="" type="checkbox"/> | C5  | GAPDH 117  | Unknown | 20.36 |               |          |        |
| <input checked="" type="checkbox"/> | C6  | GAPDH 117  | Unknown | 19.95 |               |          |        |
| <input checked="" type="checkbox"/> | C7  | GAPDH 119  | Unknown | 20.98 |               |          |        |
| <input checked="" type="checkbox"/> | C8  | GAPDH 119  | Unknown | 20.78 |               |          |        |
| <input checked="" type="checkbox"/> | C9  | GAPDH 119  | Unknown | 20.47 |               |          |        |
| <input checked="" type="checkbox"/> | C10 | GAPDH 120  | Unknown | 21.40 |               |          |        |
| <input checked="" type="checkbox"/> | C11 | GAPDH 120  | Unknown | 21.58 |               |          |        |
| <input checked="" type="checkbox"/> | C12 | GAPDH 120  | Unknown | 21.76 |               |          |        |
| <input checked="" type="checkbox"/> | D1  | FCER1A 115 | Unknown | 28.86 |               |          |        |
| <input checked="" type="checkbox"/> | D2  | FCER1A 115 | Unknown | 26.95 |               |          |        |
| <input checked="" type="checkbox"/> | D3  | FCER1A 115 | Unknown | 26.95 |               |          |        |
| <input checked="" type="checkbox"/> | D4  | FCER1A 117 | Unknown | 27.57 |               |          |        |
| <input checked="" type="checkbox"/> | D5  | FCER1A 117 | Unknown | 25.08 |               |          |        |
| <input checked="" type="checkbox"/> | D6  | FCER1A 117 | Unknown | 27.05 |               |          |        |
| <input checked="" type="checkbox"/> | D7  | FCER1A 119 | Unknown | 28.36 |               |          |        |
| <input checked="" type="checkbox"/> | D8  | FCER1A 119 | Unknown | 28.15 |               |          |        |
| <input checked="" type="checkbox"/> | D9  | FCER1A 119 | Unknown | 28.22 |               |          |        |
| <input checked="" type="checkbox"/> | D10 | FCER1A 120 | Unknown | 28.49 |               |          |        |
| <input checked="" type="checkbox"/> | D11 | FCER1A 120 | Unknown | 28.39 |               |          |        |
| <input checked="" type="checkbox"/> | D12 | FCER1A 120 | Unknown | 28.62 |               |          |        |
| <input checked="" type="checkbox"/> | E1  |            | Unknown |       |               |          |        |
| <input checked="" type="checkbox"/> | E2  |            | Unknown |       |               |          |        |
| <input checked="" type="checkbox"/> | E3  |            | Unknown |       |               |          |        |
| <input checked="" type="checkbox"/> | E4  |            | Unknown |       |               |          |        |
| <input checked="" type="checkbox"/> | E5  |            | Unknown |       |               |          |        |
| <input checked="" type="checkbox"/> | E6  |            | Unknown |       |               |          |        |
| <input checked="" type="checkbox"/> | E7  |            | Unknown |       |               |          |        |
| <input checked="" type="checkbox"/> | E8  |            | Unknown |       |               |          |        |
| <input checked="" type="checkbox"/> | E9  |            | Unknown |       |               |          |        |
| <input checked="" type="checkbox"/> | E10 |            | Unknown |       |               |          |        |
| <input checked="" type="checkbox"/> | E11 |            | Unknown |       |               |          |        |
| <input checked="" type="checkbox"/> | E12 |            | Unknown |       |               |          |        |
| <input checked="" type="checkbox"/> | F1  |            | Unknown |       |               |          |        |
| <input checked="" type="checkbox"/> | F2  |            | Unknown |       |               |          |        |
| <input checked="" type="checkbox"/> | F3  |            | Unknown |       |               |          |        |
| <input checked="" type="checkbox"/> | F4  |            | Unknown |       |               |          |        |

---

**Results**

| Inc                                 | Pos | Name | Type    | CP | Concentration | Standard | Status |
|-------------------------------------|-----|------|---------|----|---------------|----------|--------|
| <input checked="" type="checkbox"/> | F5  |      | Unknown |    |               |          |        |
| <input checked="" type="checkbox"/> | F6  |      | Unknown |    |               |          |        |
| <input checked="" type="checkbox"/> | F7  |      | Unknown |    |               |          |        |
| <input checked="" type="checkbox"/> | F8  |      | Unknown |    |               |          |        |
| <input checked="" type="checkbox"/> | F9  |      | Unknown |    |               |          |        |
| <input checked="" type="checkbox"/> | F10 |      | Unknown |    |               |          |        |
| <input checked="" type="checkbox"/> | F11 |      | Unknown |    |               |          |        |
| <input checked="" type="checkbox"/> | F12 |      | Unknown |    |               |          |        |
| <input checked="" type="checkbox"/> | G1  |      | Unknown |    |               |          |        |
| <input checked="" type="checkbox"/> | G2  |      | Unknown |    |               |          |        |
| <input checked="" type="checkbox"/> | G3  |      | Unknown |    |               |          |        |
| <input checked="" type="checkbox"/> | G4  |      | Unknown |    |               |          |        |
| <input checked="" type="checkbox"/> | G5  |      | Unknown |    |               |          |        |
| <input checked="" type="checkbox"/> | G6  |      | Unknown |    |               |          |        |
| <input checked="" type="checkbox"/> | G7  |      | Unknown |    |               |          |        |
| <input checked="" type="checkbox"/> | G8  |      | Unknown |    |               |          |        |
| <input checked="" type="checkbox"/> | G9  |      | Unknown |    |               |          |        |
| <input checked="" type="checkbox"/> | G10 |      | Unknown |    |               |          |        |
| <input checked="" type="checkbox"/> | G11 |      | Unknown |    |               |          |        |
| <input checked="" type="checkbox"/> | G12 |      | Unknown |    |               |          |        |
| <input checked="" type="checkbox"/> | H1  |      | Unknown |    |               |          |        |
| <input checked="" type="checkbox"/> | H2  |      | Unknown |    |               |          |        |
| <input checked="" type="checkbox"/> | H3  |      | Unknown |    |               |          |        |
| <input checked="" type="checkbox"/> | H4  |      | Unknown |    |               |          |        |
| <input checked="" type="checkbox"/> | H5  |      | Unknown |    |               |          |        |
| <input checked="" type="checkbox"/> | H6  |      | Unknown |    |               |          |        |
| <input checked="" type="checkbox"/> | H7  |      | Unknown |    |               |          |        |
| <input checked="" type="checkbox"/> | H8  |      | Unknown |    |               |          |        |
| <input checked="" type="checkbox"/> | H9  |      | Unknown |    |               |          |        |
| <input checked="" type="checkbox"/> | H10 |      | Unknown |    |               |          |        |
| <input checked="" type="checkbox"/> | H11 |      | Unknown |    |               |          |        |
| <input checked="" type="checkbox"/> | H12 |      | Unknown |    |               |          |        |

**Amplification Curves**

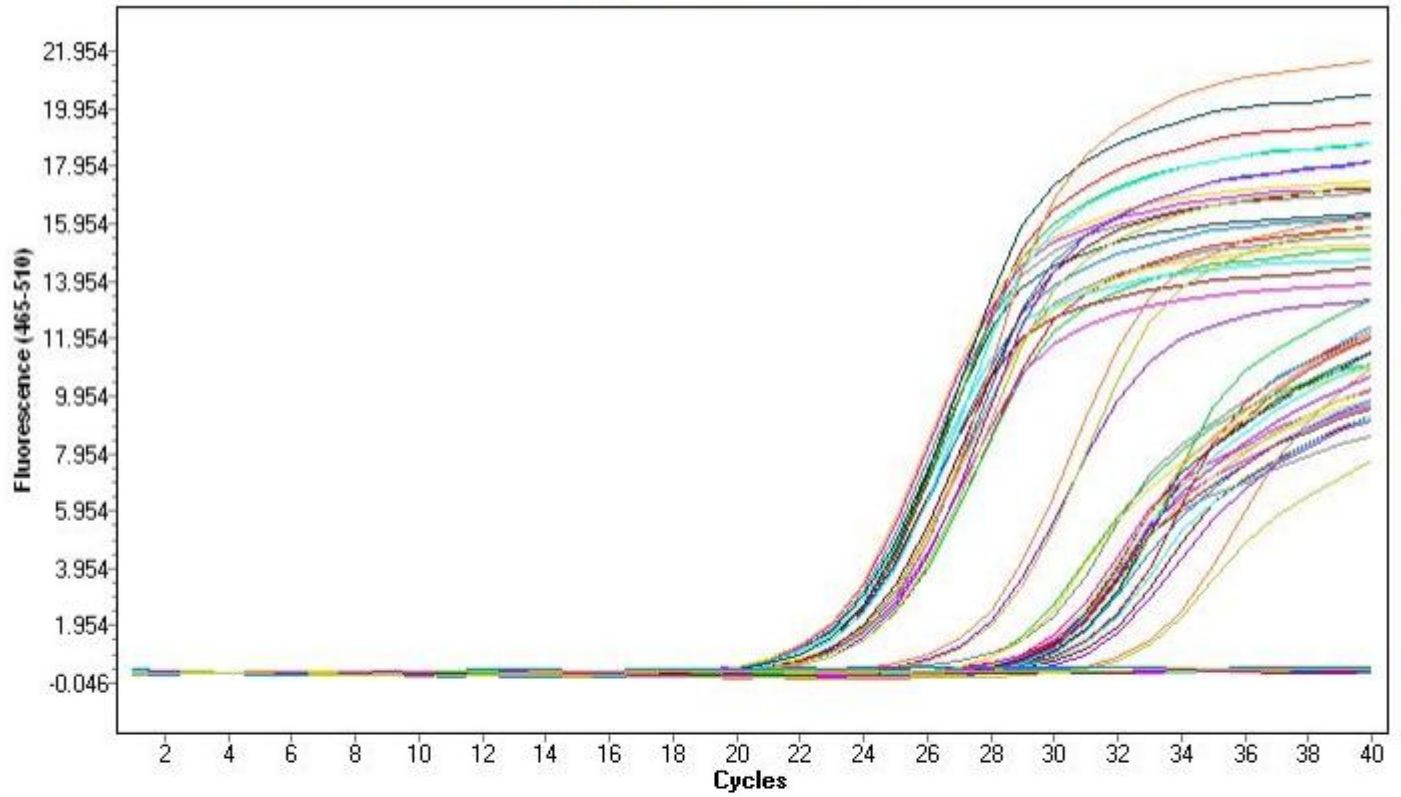

**Amplification Curves**

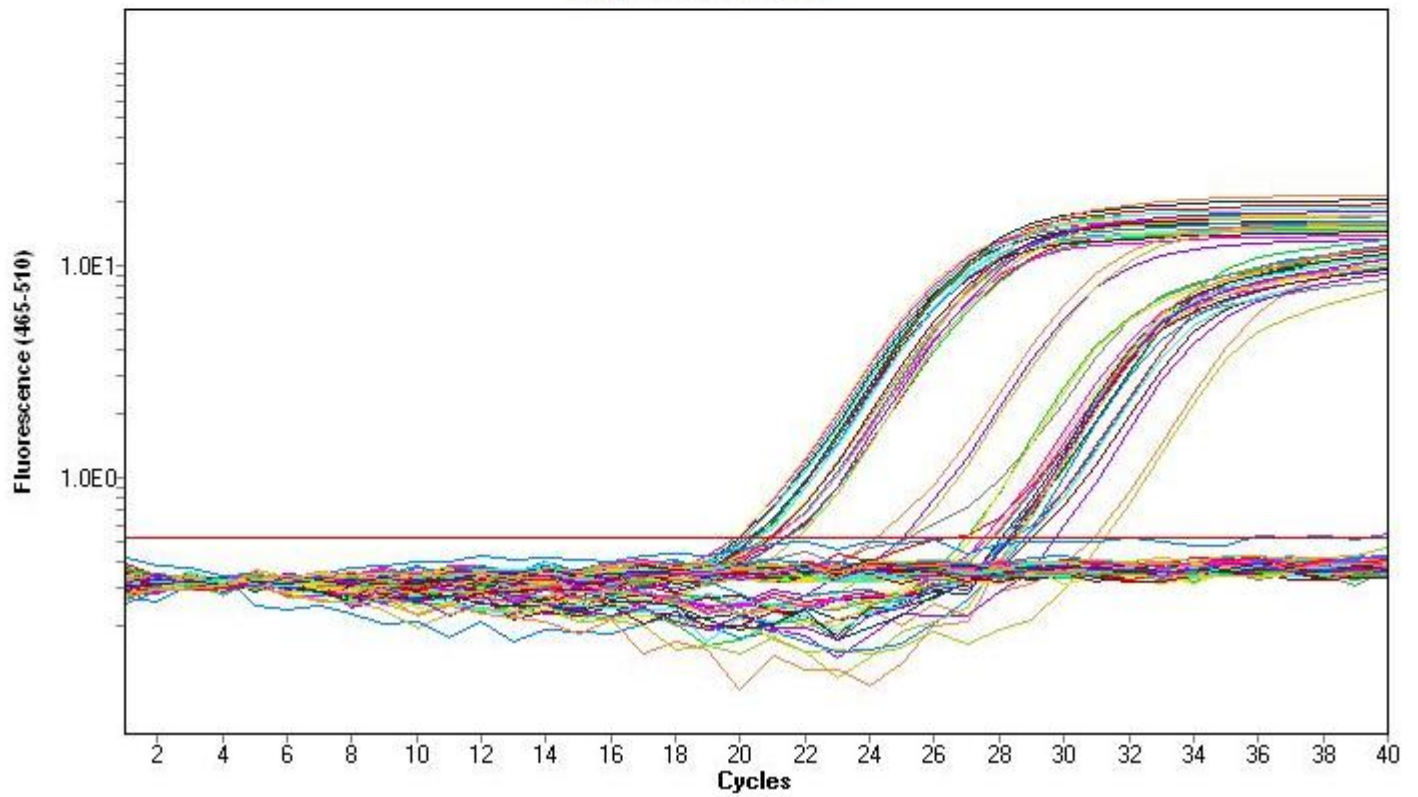

### Amplification Curves

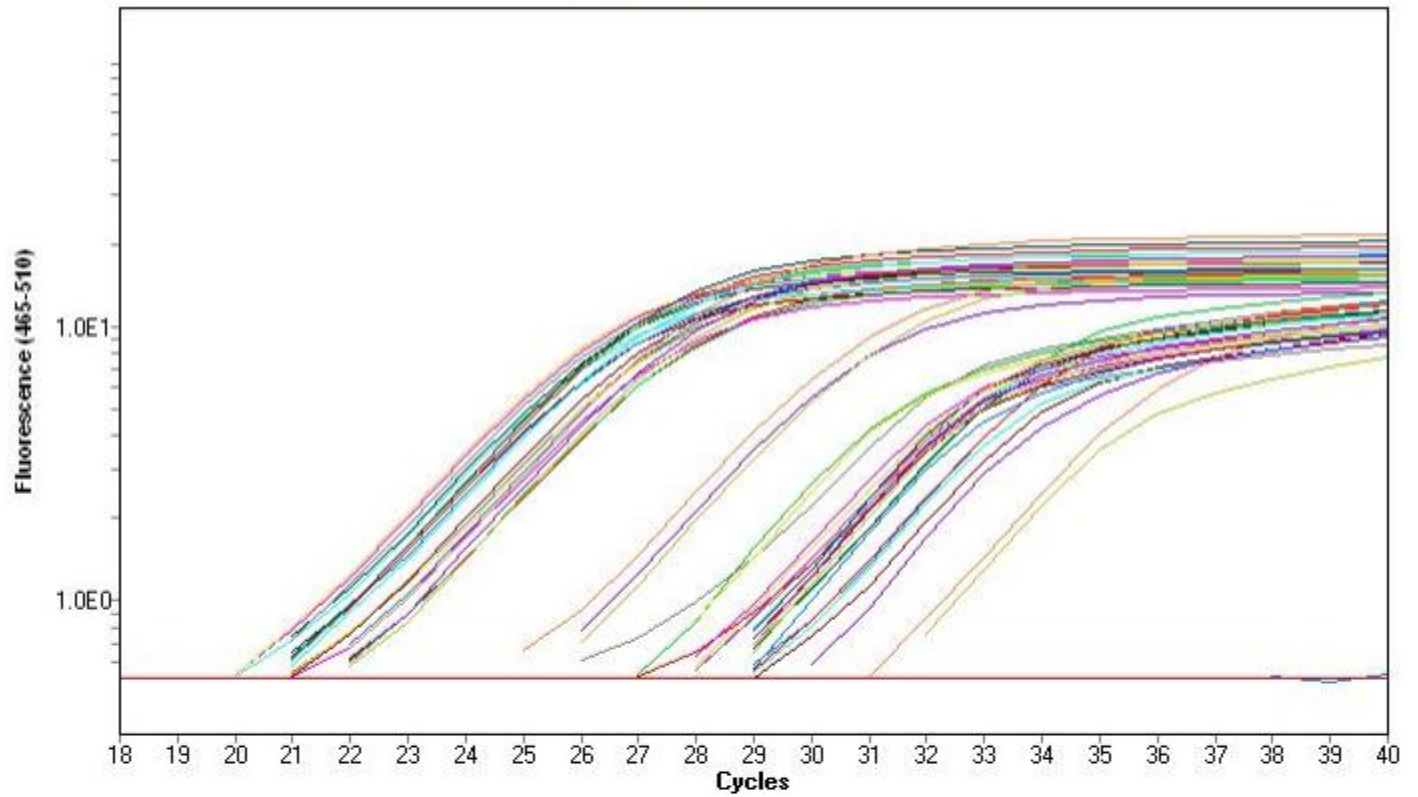

### Standard Curve

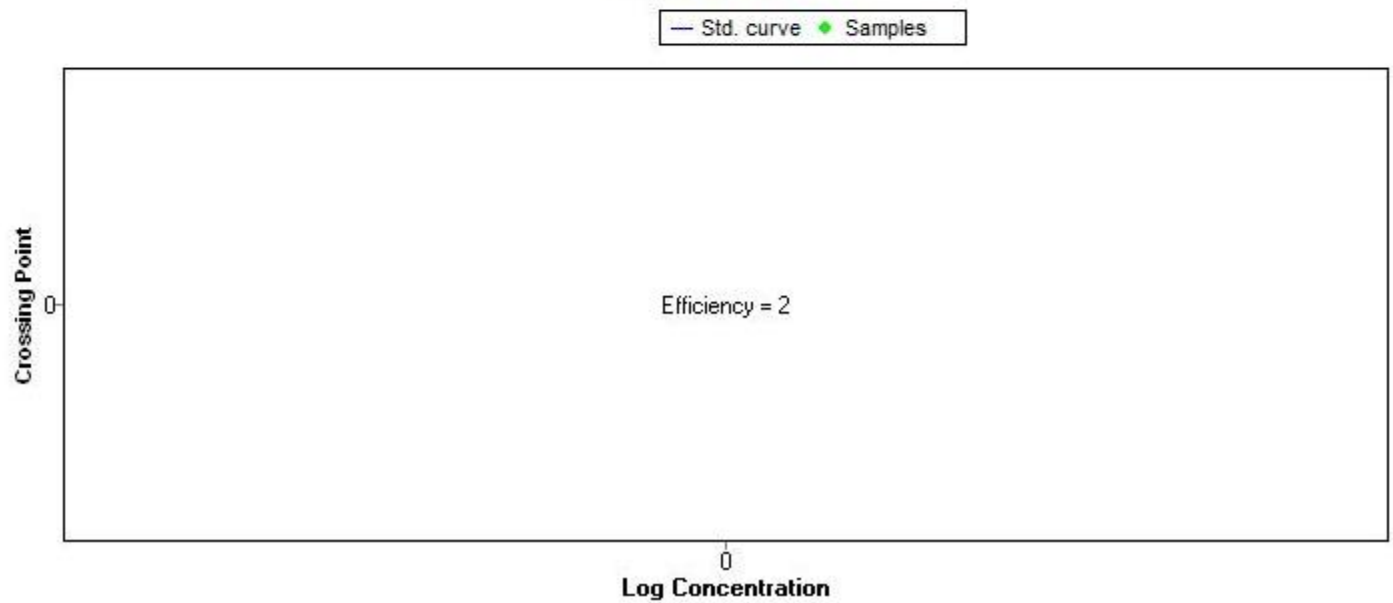

### Analysis Notes

### Melting Curves

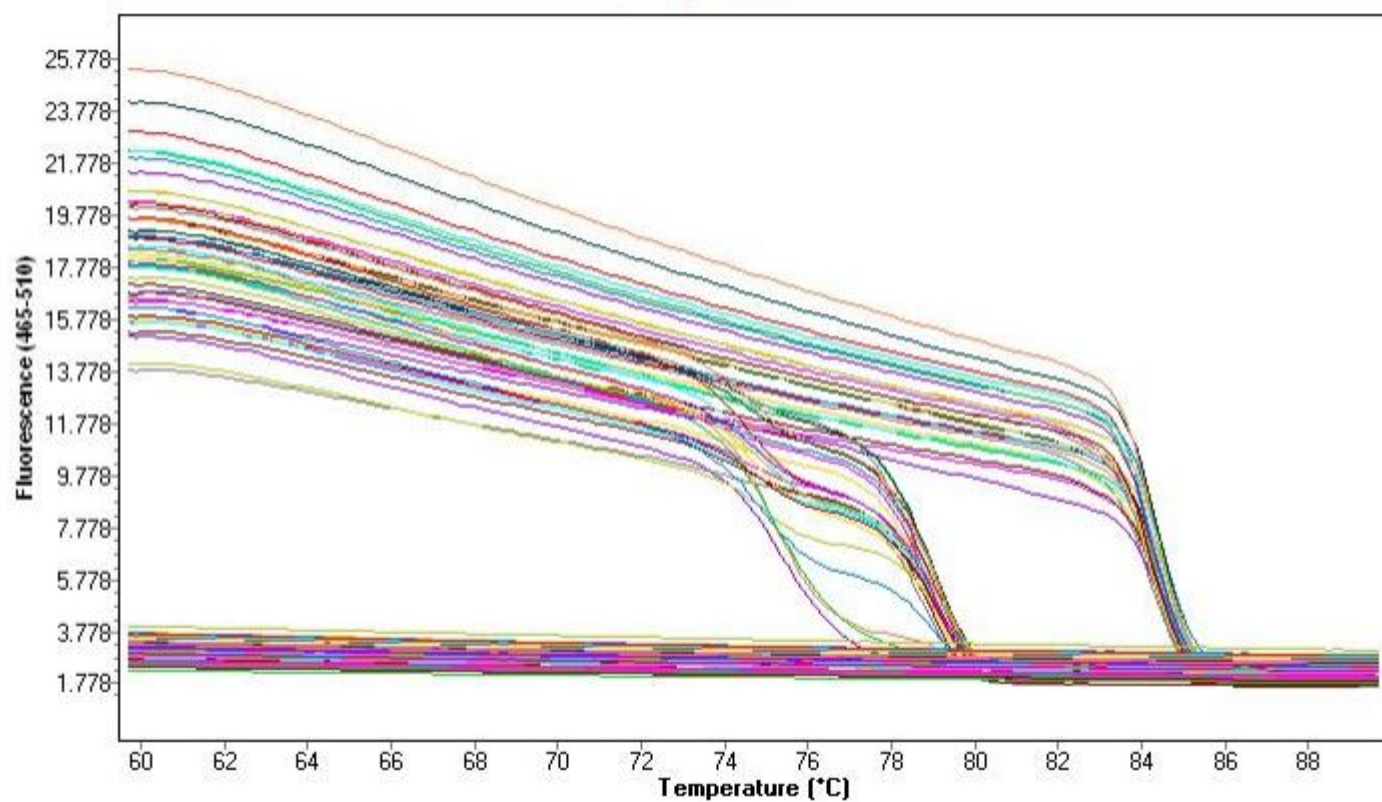

### Normalized Melting Curves

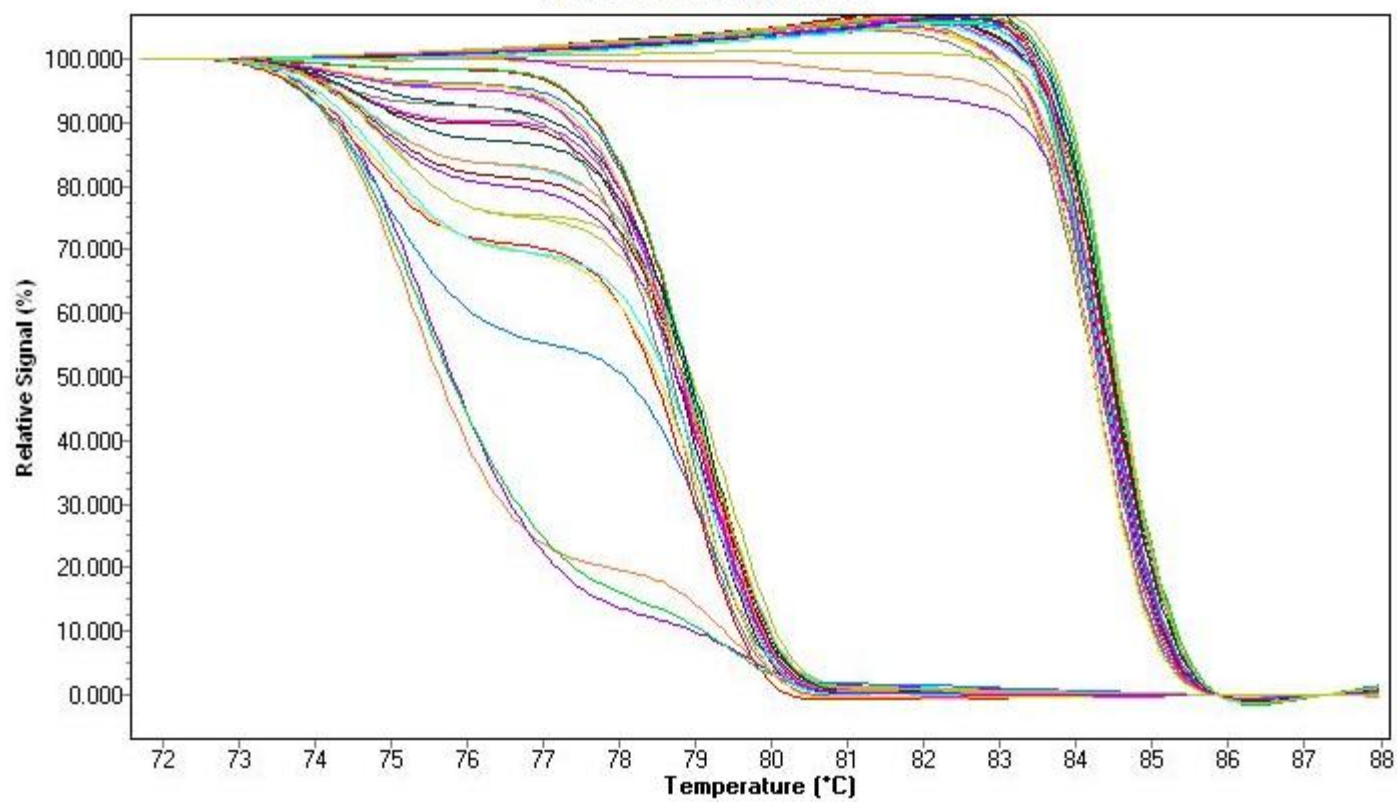



**Normalized and Shifted Melting Curves**

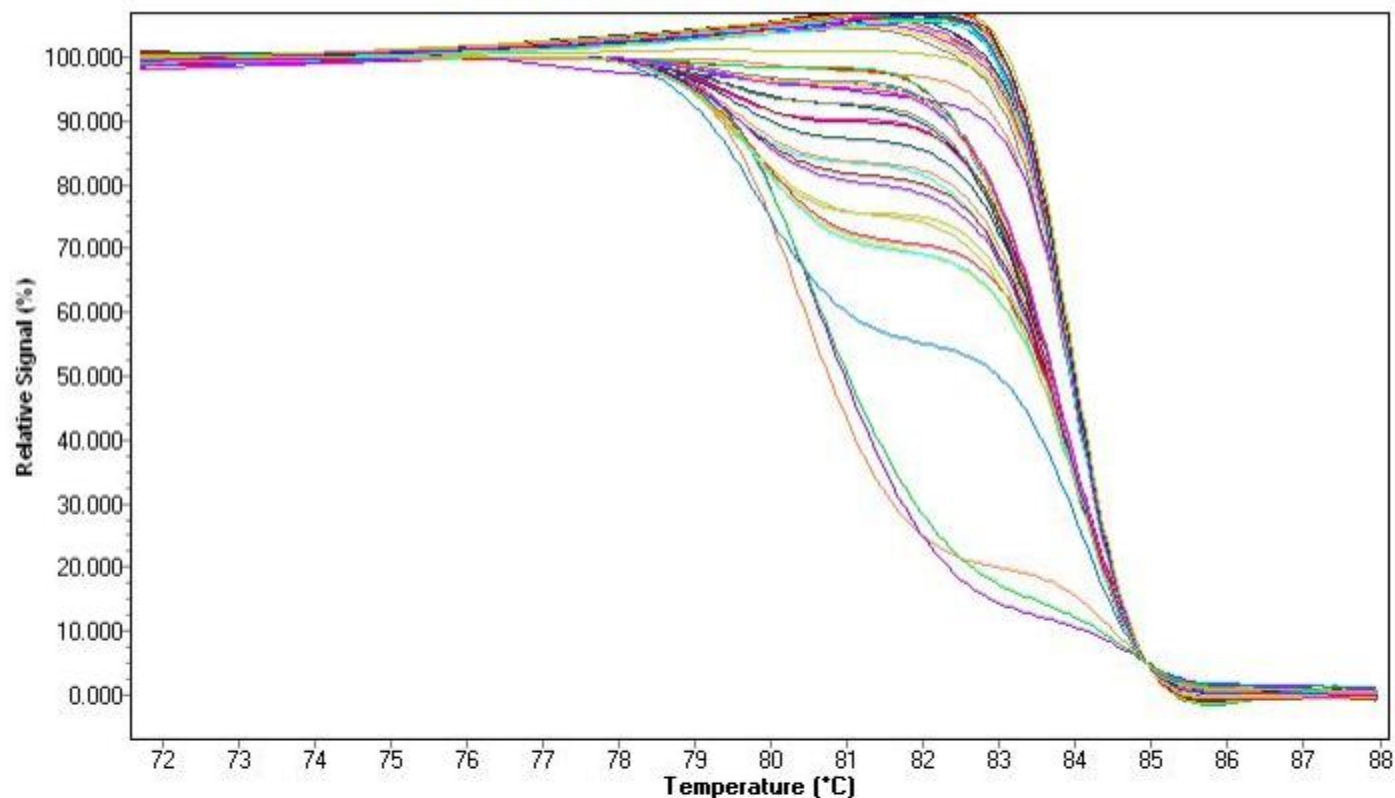

**Normalized and Temp-Shifted Difference Plot**

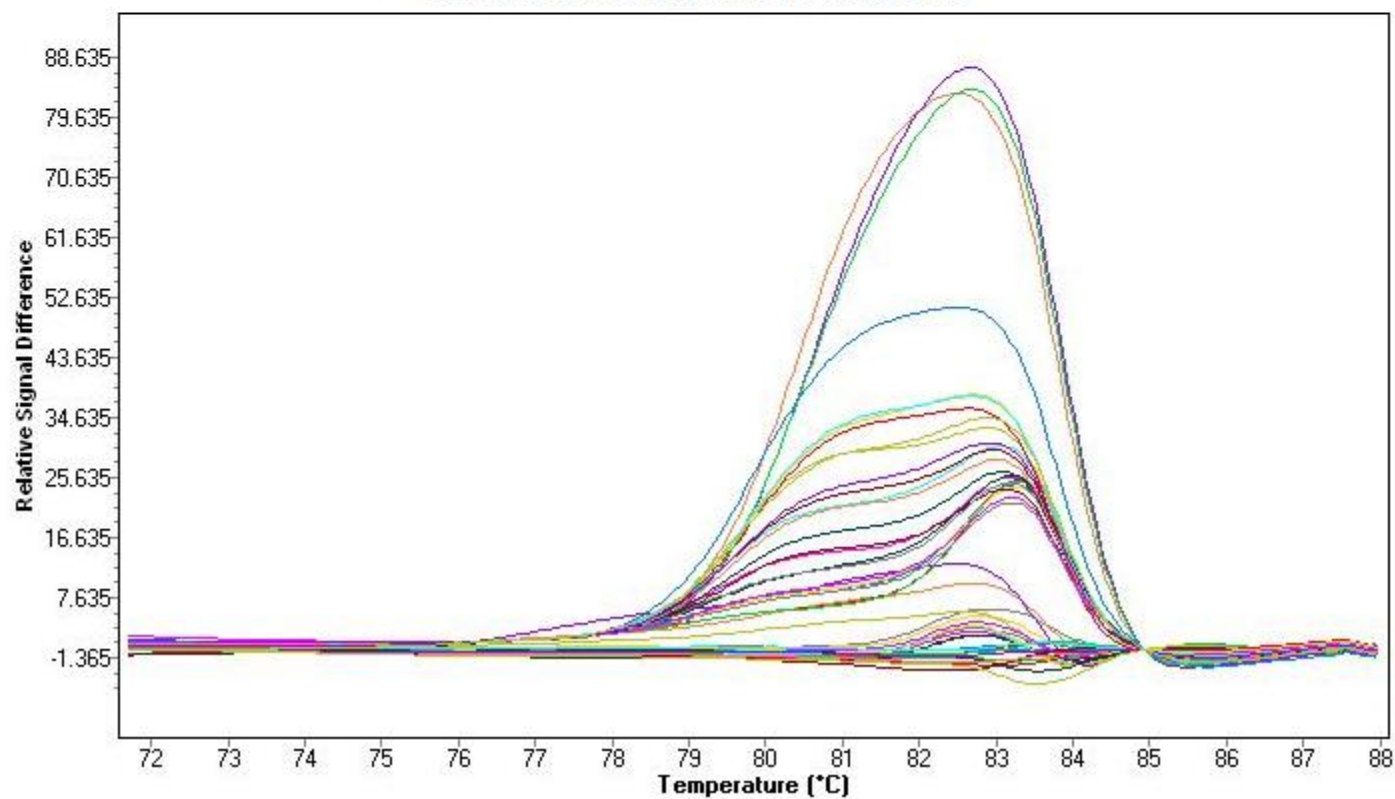

**Analysis Notes**

## Melt Curve Genotyping for All Samples (Melt Curve Genotyping)

|                |            |                    |       |
|----------------|------------|--------------------|-------|
| Channel        | 465-510    | Color Compensation | Off   |
| Program Name   | Program    |                    |       |
| Std's Settings | Auto-Group |                    |       |
| Sensitivity    | Normal     | Temp Range         | 63-85 |
| Score          | 0.7        | Res                | 0.1   |

|             |             |
|-------------|-------------|
| Subset Name | All Samples |
|-------------|-------------|

### Results

| Inc                                 | Pos. | Sample Name | Sample Type | Group | Score | Resolution | Status |
|-------------------------------------|------|-------------|-------------|-------|-------|------------|--------|
| <input checked="" type="checkbox"/> | A1   | GAPDH 102   | Unknown     | 1     | 0.99  | 0.91       |        |
| <input checked="" type="checkbox"/> | A2   | GAPDH 102   | Unknown     | 1     | 0.99  | 0.91       |        |
| <input checked="" type="checkbox"/> | A3   | GAPDH 102   | Unknown     | 1     | 0.99  | 0.91       |        |
| <input checked="" type="checkbox"/> | A4   | GAPDH 107   | Unknown     | 1     | 0.99  | 0.91       |        |
| <input checked="" type="checkbox"/> | A5   | GAPDH 107   | Unknown     | 1     | 0.99  | 0.93       |        |
| <input checked="" type="checkbox"/> | A6   | GAPDH 107   | Unknown     | 1     | 0.99  | 0.92       |        |
| <input checked="" type="checkbox"/> | A7   | GAPDH 110   | Unknown     | 1     | 0.99  | 0.92       |        |
| <input checked="" type="checkbox"/> | A8   | GAPDH 110   | Unknown     | 1     | 0.99  | 0.91       |        |
| <input checked="" type="checkbox"/> | A9   | GAPDH 110   | Unknown     | 1     | 0.99  | 0.90       |        |
| <input checked="" type="checkbox"/> | A10  | GAPDH 113   | Unknown     | 1     | 0.97  | 0.88       |        |
| <input checked="" type="checkbox"/> | A11  | GAPDH 113   | Unknown     | 1     | 0.95  | 0.84       |        |
| <input checked="" type="checkbox"/> | A12  | GAPDH 113   | Unknown     | 1     | 0.99  | 0.92       |        |
| <input checked="" type="checkbox"/> | B1   | FCER1A 102  | Unknown     | 2     | 0.89  | 0.34       |        |
| <input checked="" type="checkbox"/> | B2   | FCER1A 102  | Unknown     | 2     | 0.82  | 0.33       |        |
| <input checked="" type="checkbox"/> | B3   | FCER1A 102  | Unknown     | 2     | 0.83  | 0.33       |        |
| <input checked="" type="checkbox"/> | B4   | FCER1A 107  | Unknown     | 2     | 0.98  | 0.30       |        |
| <input checked="" type="checkbox"/> | B5   | FCER1A 107  | Unknown     | 2     | 0.85  | 0.23       |        |
| <input checked="" type="checkbox"/> | B6   | FCER1A 107  | Unknown     | 2     | 0.88  | 0.30       |        |
| <input checked="" type="checkbox"/> | B7   | FCER1A 110  | Unknown     | 2     | 0.97  | 0.27       |        |
| <input checked="" type="checkbox"/> | B8   | FCER1A 110  | Unknown     | 2     | 0.98  | 0.29       |        |
| <input checked="" type="checkbox"/> | B9   | FCER1A 110  | Unknown     | 2     | 0.93  | 0.33       |        |
| <input checked="" type="checkbox"/> | B10  | FCER1A 113  | Unknown     | 3     | 0.98  | 0.40       |        |
| <input checked="" type="checkbox"/> | B11  | FCER1A 113  | Unknown     | 3     | 0.99  | 0.30       |        |
| <input checked="" type="checkbox"/> | B12  | FCER1A 113  | Unknown     | 2     | 0.88  | 0.25       |        |
| <input checked="" type="checkbox"/> | C1   | GAPDH 115   | Unknown     | 1     | 0.99  | 0.92       |        |
| <input checked="" type="checkbox"/> | C2   | GAPDH 115   | Unknown     | 1     | 0.99  | 0.93       |        |
| <input checked="" type="checkbox"/> | C3   | GAPDH 115   | Unknown     | 1     | 0.99  | 0.93       |        |
| <input checked="" type="checkbox"/> | C4   | GAPDH 117   | Unknown     | 1     | 0.99  | 0.93       |        |
| <input checked="" type="checkbox"/> | C5   | GAPDH 117   | Unknown     | 1     | 0.99  | 0.93       |        |
| <input checked="" type="checkbox"/> | C6   | GAPDH 117   | Unknown     | 1     | 0.99  | 0.92       |        |
| <input checked="" type="checkbox"/> | C7   | GAPDH 119   | Unknown     | 1     | 0.99  | 0.93       |        |



## Results

| Inc                                 | Pos. | Sample Name | Sample Type | Group    | Score | Resolution | Status |
|-------------------------------------|------|-------------|-------------|----------|-------|------------|--------|
| <input checked="" type="checkbox"/> | C8   | GAPDH 119   | Unknown     | 1        | 0.99  | 0.93       |        |
| <input checked="" type="checkbox"/> | C9   | GAPDH 119   | Unknown     | 1        | 0.99  | 0.91       |        |
| <input checked="" type="checkbox"/> | C10  | GAPDH 120   | Unknown     | 1        | 0.99  | 0.92       |        |
| <input checked="" type="checkbox"/> | C11  | GAPDH 120   | Unknown     | 1        | 0.99  | 0.92       |        |
| <input checked="" type="checkbox"/> | C12  | GAPDH 120   | Unknown     | 1        | 1.00  | 0.91       |        |
| <input checked="" type="checkbox"/> | D1   | FCER1A 115  | Unknown     | Unknown  | 0.67  | 0.10       |        |
| <input checked="" type="checkbox"/> | D2   | FCER1A 115  | Unknown     | 2        | 0.81  | 0.18       |        |
| <input checked="" type="checkbox"/> | D3   | FCER1A 115  | Unknown     | 3        | 1.00  | 0.33       |        |
| <input checked="" type="checkbox"/> | D4   | FCER1A 117  | Unknown     | 2        | 0.88  | 0.30       |        |
| <input checked="" type="checkbox"/> | D5   | FCER1A 117  | Unknown     | 2        | 0.93  | 0.20       |        |
| <input checked="" type="checkbox"/> | D6   | FCER1A 117  | Unknown     | 2        | 0.79  | 0.16       |        |
| <input checked="" type="checkbox"/> | D7   | FCER1A 119  | Unknown     | 2        | 0.96  | 0.27       |        |
| <input checked="" type="checkbox"/> | D8   | FCER1A 119  | Unknown     | 2        | 0.80  | 0.17       |        |
| <input checked="" type="checkbox"/> | D9   | FCER1A 119  | Unknown     | 2        | 1.00  | 0.33       |        |
| <input checked="" type="checkbox"/> | D10  | FCER1A 120  | Unknown     | 2        | 0.98  | 0.27       |        |
| <input checked="" type="checkbox"/> | D11  | FCER1A 120  | Unknown     | 2        | 0.94  | 0.22       |        |
| <input checked="" type="checkbox"/> | D12  | FCER1A 120  | Unknown     | 2        | 0.89  | 0.22       |        |
| <input checked="" type="checkbox"/> | E1   |             | Unknown     | Negative | 1.00  | 1.00       |        |
| <input checked="" type="checkbox"/> | E2   |             | Unknown     | Negative | 1.00  | 1.00       |        |
| <input checked="" type="checkbox"/> | E3   |             | Unknown     | Negative | 1.00  | 1.00       |        |
| <input checked="" type="checkbox"/> | E4   |             | Unknown     | Negative | 1.00  | 1.00       |        |
| <input checked="" type="checkbox"/> | E5   |             | Unknown     | Negative | 1.00  | 1.00       |        |
| <input checked="" type="checkbox"/> | E6   |             | Unknown     | Negative | 1.00  | 1.00       |        |
| <input checked="" type="checkbox"/> | E7   |             | Unknown     | Negative | 1.00  | 1.00       |        |
| <input checked="" type="checkbox"/> | E8   |             | Unknown     | Negative | 1.00  | 1.00       |        |
| <input checked="" type="checkbox"/> | E9   |             | Unknown     | Negative | 1.00  | 1.00       |        |
| <input checked="" type="checkbox"/> | E10  |             | Unknown     | Negative | 1.00  | 1.00       |        |
| <input checked="" type="checkbox"/> | E11  |             | Unknown     | Negative | 1.00  | 1.00       |        |
| <input checked="" type="checkbox"/> | E12  |             | Unknown     | Negative | 1.00  | 1.00       |        |
| <input checked="" type="checkbox"/> | F1   |             | Unknown     | Negative | 1.00  | 1.00       |        |
| <input checked="" type="checkbox"/> | F2   |             | Unknown     | Negative | 1.00  | 1.00       |        |
| <input checked="" type="checkbox"/> | F3   |             | Unknown     | Negative | 1.00  | 1.00       |        |
| <input checked="" type="checkbox"/> | F4   |             | Unknown     | Negative | 1.00  | 1.00       |        |
| <input checked="" type="checkbox"/> | F5   |             | Unknown     | Negative | 1.00  | 1.00       |        |
| <input checked="" type="checkbox"/> | F6   |             | Unknown     | Negative | 1.00  | 1.00       |        |
| <input checked="" type="checkbox"/> | F7   |             | Unknown     | Negative | 1.00  | 1.00       |        |
| <input checked="" type="checkbox"/> | F8   |             | Unknown     | Negative | 1.00  | 1.00       |        |
| <input checked="" type="checkbox"/> | F9   |             | Unknown     | Negative | 1.00  | 1.00       |        |

## Results

| Inc                                 | Pos. | Sample Name | Sample Type | Group    | Score | Resolution | Status |
|-------------------------------------|------|-------------|-------------|----------|-------|------------|--------|
| <input checked="" type="checkbox"/> | F10  |             | Unknown     | Negative | 1.00  | 1.00       |        |
| <input checked="" type="checkbox"/> | F11  |             | Unknown     | Negative | 1.00  | 1.00       |        |
| <input checked="" type="checkbox"/> | F12  |             | Unknown     | Negative | 1.00  | 1.00       |        |
| <input checked="" type="checkbox"/> | G1   |             | Unknown     | Negative | 1.00  | 1.00       |        |
| <input checked="" type="checkbox"/> | G2   |             | Unknown     | Negative | 1.00  | 1.00       |        |
| <input checked="" type="checkbox"/> | G3   |             | Unknown     | Negative | 1.00  | 1.00       |        |
| <input checked="" type="checkbox"/> | G4   |             | Unknown     | Negative | 1.00  | 1.00       |        |
| <input checked="" type="checkbox"/> | G5   |             | Unknown     | Negative | 1.00  | 1.00       |        |
| <input checked="" type="checkbox"/> | G6   |             | Unknown     | Negative | 1.00  | 1.00       |        |
| <input checked="" type="checkbox"/> | G7   |             | Unknown     | Negative | 1.00  | 1.00       |        |
| <input checked="" type="checkbox"/> | G8   |             | Unknown     | Negative | 1.00  | 1.00       |        |
| <input checked="" type="checkbox"/> | G9   |             | Unknown     | Negative | 1.00  | 1.00       |        |
| <input checked="" type="checkbox"/> | G10  |             | Unknown     | Negative | 1.00  | 1.00       |        |
| <input checked="" type="checkbox"/> | G11  |             | Unknown     | Negative | 1.00  | 1.00       |        |
| <input checked="" type="checkbox"/> | G12  |             | Unknown     | Negative | 1.00  | 1.00       |        |
| <input checked="" type="checkbox"/> | H1   |             | Unknown     | Negative | 1.00  | 1.00       |        |
| <input checked="" type="checkbox"/> | H2   |             | Unknown     | Negative | 1.00  | 1.00       |        |
| <input checked="" type="checkbox"/> | H3   |             | Unknown     | Negative | 1.00  | 1.00       |        |
| <input checked="" type="checkbox"/> | H4   |             | Unknown     | Negative | 1.00  | 1.00       |        |
| <input checked="" type="checkbox"/> | H5   |             | Unknown     | Negative | 1.00  | 1.00       |        |
| <input checked="" type="checkbox"/> | H6   |             | Unknown     | Negative | 1.00  | 1.00       |        |
| <input checked="" type="checkbox"/> | H7   |             | Unknown     | Negative | 1.00  | 1.00       |        |
| <input checked="" type="checkbox"/> | H8   |             | Unknown     | Negative | 1.00  | 1.00       |        |
| <input checked="" type="checkbox"/> | H9   |             | Unknown     | Negative | 1.00  | 1.00       |        |
| <input checked="" type="checkbox"/> | H10  |             | Unknown     | Negative | 1.00  | 1.00       |        |
| <input checked="" type="checkbox"/> | H11  |             | Unknown     | Negative | 1.00  | 1.00       |        |
| <input checked="" type="checkbox"/> | H12  |             | Unknown     | Negative | 1.00  | 1.00       |        |

## Group 1

| Inc                                 | Pos | Sample Name | Sample Type | Score | Resolution | Status |
|-------------------------------------|-----|-------------|-------------|-------|------------|--------|
| <input checked="" type="checkbox"/> | A1  | GAPDH 102   | Unknown     | 0.99  | 0.91       |        |
| <input checked="" type="checkbox"/> | A2  | GAPDH 102   | Unknown     | 0.99  | 0.91       |        |
| <input checked="" type="checkbox"/> | A3  | GAPDH 102   | Unknown     | 0.99  | 0.91       |        |
| <input checked="" type="checkbox"/> | A4  | GAPDH 107   | Unknown     | 0.99  | 0.91       |        |
| <input checked="" type="checkbox"/> | A5  | GAPDH 107   | Unknown     | 0.99  | 0.93       |        |
| <input checked="" type="checkbox"/> | A6  | GAPDH 107   | Unknown     | 0.99  | 0.92       |        |
| <input checked="" type="checkbox"/> | A7  | GAPDH 110   | Unknown     | 0.99  | 0.92       |        |
| <input checked="" type="checkbox"/> | A8  | GAPDH 110   | Unknown     | 0.99  | 0.91       |        |

| Group 1                             |     |             |             |       |            |        |
|-------------------------------------|-----|-------------|-------------|-------|------------|--------|
| Inc                                 | Pos | Sample Name | Sample Type | Score | Resolution | Status |
| <input checked="" type="checkbox"/> | A9  | GAPDH 110   | Unknown     | 0.99  | 0.90       |        |
| <input checked="" type="checkbox"/> | A10 | GAPDH 113   | Unknown     | 0.97  | 0.88       |        |
| <input checked="" type="checkbox"/> | A11 | GAPDH 113   | Unknown     | 0.95  | 0.84       |        |
| <input checked="" type="checkbox"/> | A12 | GAPDH 113   | Unknown     | 0.99  | 0.92       |        |
| <input checked="" type="checkbox"/> | C1  | GAPDH 115   | Unknown     | 0.99  | 0.92       |        |
| <input checked="" type="checkbox"/> | C2  | GAPDH 115   | Unknown     | 0.99  | 0.93       |        |
| <input checked="" type="checkbox"/> | C3  | GAPDH 115   | Unknown     | 0.99  | 0.93       |        |
| <input checked="" type="checkbox"/> | C4  | GAPDH 117   | Unknown     | 0.99  | 0.93       |        |
| <input checked="" type="checkbox"/> | C5  | GAPDH 117   | Unknown     | 0.99  | 0.93       |        |
| <input checked="" type="checkbox"/> | C6  | GAPDH 117   | Unknown     | 0.99  | 0.92       |        |
| <input checked="" type="checkbox"/> | C7  | GAPDH 119   | Unknown     | 0.99  | 0.93       |        |
| <input checked="" type="checkbox"/> | C8  | GAPDH 119   | Unknown     | 0.99  | 0.93       |        |
| <input checked="" type="checkbox"/> | C9  | GAPDH 119   | Unknown     | 0.99  | 0.91       |        |
| <input checked="" type="checkbox"/> | C10 | GAPDH 120   | Unknown     | 0.99  | 0.92       |        |
| <input checked="" type="checkbox"/> | C11 | GAPDH 120   | Unknown     | 0.99  | 0.92       |        |
| <input checked="" type="checkbox"/> | C12 | GAPDH 120   | Unknown     | 1.00  | 0.91       |        |

| Group 2                             |     |             |             |       |            |        |
|-------------------------------------|-----|-------------|-------------|-------|------------|--------|
| Inc                                 | Pos | Sample Name | Sample Type | Score | Resolution | Status |
| <input checked="" type="checkbox"/> | B1  | FCER1A 102  | Unknown     | 0.89  | 0.34       |        |
| <input checked="" type="checkbox"/> | B2  | FCER1A 102  | Unknown     | 0.82  | 0.33       |        |
| <input checked="" type="checkbox"/> | B3  | FCER1A 102  | Unknown     | 0.83  | 0.33       |        |
| <input checked="" type="checkbox"/> | B4  | FCER1A 107  | Unknown     | 0.98  | 0.30       |        |
| <input checked="" type="checkbox"/> | B5  | FCER1A 107  | Unknown     | 0.85  | 0.23       |        |
| <input checked="" type="checkbox"/> | B6  | FCER1A 107  | Unknown     | 0.88  | 0.30       |        |
| <input checked="" type="checkbox"/> | B7  | FCER1A 110  | Unknown     | 0.97  | 0.27       |        |
| <input checked="" type="checkbox"/> | B8  | FCER1A 110  | Unknown     | 0.98  | 0.29       |        |
| <input checked="" type="checkbox"/> | B9  | FCER1A 110  | Unknown     | 0.93  | 0.33       |        |
| <input checked="" type="checkbox"/> | B12 | FCER1A 113  | Unknown     | 0.88  | 0.25       |        |
| <input checked="" type="checkbox"/> | D2  | FCER1A 115  | Unknown     | 0.81  | 0.18       |        |
| <input checked="" type="checkbox"/> | D4  | FCER1A 117  | Unknown     | 0.88  | 0.30       |        |
| <input checked="" type="checkbox"/> | D5  | FCER1A 117  | Unknown     | 0.93  | 0.20       |        |
| <input checked="" type="checkbox"/> | D6  | FCER1A 117  | Unknown     | 0.79  | 0.16       |        |
| <input checked="" type="checkbox"/> | D7  | FCER1A 119  | Unknown     | 0.96  | 0.27       |        |
| <input checked="" type="checkbox"/> | D8  | FCER1A 119  | Unknown     | 0.80  | 0.17       |        |
| <input checked="" type="checkbox"/> | D9  | FCER1A 119  | Unknown     | 1.00  | 0.33       |        |
| <input checked="" type="checkbox"/> | D10 | FCER1A 120  | Unknown     | 0.98  | 0.27       |        |
| <input checked="" type="checkbox"/> | D11 | FCER1A 120  | Unknown     | 0.94  | 0.22       |        |

| <b>Group</b> 2                      |     |             |             |       |            |        |
|-------------------------------------|-----|-------------|-------------|-------|------------|--------|
| Inc                                 | Pos | Sample Name | Sample Type | Score | Resolution | Status |
| <input checked="" type="checkbox"/> | D12 | FCER1A 120  | Unknown     | 0.89  | 0.22       |        |
| <b>Group</b> 3                      |     |             |             |       |            |        |
| Inc                                 | Pos | Sample Name | Sample Type | Score | Resolution | Status |
| <input checked="" type="checkbox"/> | B10 | FCER1A 113  | Unknown     | 0.98  | 0.40       |        |
| <input checked="" type="checkbox"/> | B11 | FCER1A 113  | Unknown     | 0.99  | 0.30       |        |
| <input checked="" type="checkbox"/> | D3  | FCER1A 115  | Unknown     | 1.00  | 0.33       |        |
| <b>Group</b> Negative               |     |             |             |       |            |        |
| Inc                                 | Pos | Sample Name | Sample Type | Score | Resolution | Status |
| <input checked="" type="checkbox"/> | E1  |             | Unknown     | 1.00  | 1.00       |        |
| <input checked="" type="checkbox"/> | E2  |             | Unknown     | 1.00  | 1.00       |        |
| <input checked="" type="checkbox"/> | E3  |             | Unknown     | 1.00  | 1.00       |        |
| <input checked="" type="checkbox"/> | E4  |             | Unknown     | 1.00  | 1.00       |        |
| <input checked="" type="checkbox"/> | E5  |             | Unknown     | 1.00  | 1.00       |        |
| <input checked="" type="checkbox"/> | E6  |             | Unknown     | 1.00  | 1.00       |        |
| <input checked="" type="checkbox"/> | E7  |             | Unknown     | 1.00  | 1.00       |        |
| <input checked="" type="checkbox"/> | E8  |             | Unknown     | 1.00  | 1.00       |        |
| <input checked="" type="checkbox"/> | E9  |             | Unknown     | 1.00  | 1.00       |        |
| <input checked="" type="checkbox"/> | E10 |             | Unknown     | 1.00  | 1.00       |        |
| <input checked="" type="checkbox"/> | E11 |             | Unknown     | 1.00  | 1.00       |        |
| <input checked="" type="checkbox"/> | E12 |             | Unknown     | 1.00  | 1.00       |        |
| <input checked="" type="checkbox"/> | F1  |             | Unknown     | 1.00  | 1.00       |        |
| <input checked="" type="checkbox"/> | F2  |             | Unknown     | 1.00  | 1.00       |        |
| <input checked="" type="checkbox"/> | F3  |             | Unknown     | 1.00  | 1.00       |        |
| <input checked="" type="checkbox"/> | F4  |             | Unknown     | 1.00  | 1.00       |        |
| <input checked="" type="checkbox"/> | F5  |             | Unknown     | 1.00  | 1.00       |        |
| <input checked="" type="checkbox"/> | F6  |             | Unknown     | 1.00  | 1.00       |        |
| <input checked="" type="checkbox"/> | F7  |             | Unknown     | 1.00  | 1.00       |        |
| <input checked="" type="checkbox"/> | F8  |             | Unknown     | 1.00  | 1.00       |        |
| <input checked="" type="checkbox"/> | F9  |             | Unknown     | 1.00  | 1.00       |        |
| <input checked="" type="checkbox"/> | F10 |             | Unknown     | 1.00  | 1.00       |        |
| <input checked="" type="checkbox"/> | F11 |             | Unknown     | 1.00  | 1.00       |        |
| <input checked="" type="checkbox"/> | F12 |             | Unknown     | 1.00  | 1.00       |        |
| <input checked="" type="checkbox"/> | G1  |             | Unknown     | 1.00  | 1.00       |        |
| <input checked="" type="checkbox"/> | G2  |             | Unknown     | 1.00  | 1.00       |        |
| <input checked="" type="checkbox"/> | G3  |             | Unknown     | 1.00  | 1.00       |        |
| <input checked="" type="checkbox"/> | G4  |             | Unknown     | 1.00  | 1.00       |        |

| Group                               |     | Negative    |             |       |            |        |
|-------------------------------------|-----|-------------|-------------|-------|------------|--------|
| Inc                                 | Pos | Sample Name | Sample Type | Score | Resolution | Status |
| <input checked="" type="checkbox"/> | G5  |             | Unknown     | 1.00  | 1.00       |        |
| <input checked="" type="checkbox"/> | G6  |             | Unknown     | 1.00  | 1.00       |        |
| <input checked="" type="checkbox"/> | G7  |             | Unknown     | 1.00  | 1.00       |        |
| <input checked="" type="checkbox"/> | G8  |             | Unknown     | 1.00  | 1.00       |        |
| <input checked="" type="checkbox"/> | G9  |             | Unknown     | 1.00  | 1.00       |        |
| <input checked="" type="checkbox"/> | G10 |             | Unknown     | 1.00  | 1.00       |        |
| <input checked="" type="checkbox"/> | G11 |             | Unknown     | 1.00  | 1.00       |        |
| <input checked="" type="checkbox"/> | G12 |             | Unknown     | 1.00  | 1.00       |        |
| <input checked="" type="checkbox"/> | H1  |             | Unknown     | 1.00  | 1.00       |        |
| <input checked="" type="checkbox"/> | H2  |             | Unknown     | 1.00  | 1.00       |        |
| <input checked="" type="checkbox"/> | H3  |             | Unknown     | 1.00  | 1.00       |        |
| <input checked="" type="checkbox"/> | H4  |             | Unknown     | 1.00  | 1.00       |        |
| <input checked="" type="checkbox"/> | H5  |             | Unknown     | 1.00  | 1.00       |        |
| <input checked="" type="checkbox"/> | H6  |             | Unknown     | 1.00  | 1.00       |        |
| <input checked="" type="checkbox"/> | H7  |             | Unknown     | 1.00  | 1.00       |        |
| <input checked="" type="checkbox"/> | H8  |             | Unknown     | 1.00  | 1.00       |        |
| <input checked="" type="checkbox"/> | H9  |             | Unknown     | 1.00  | 1.00       |        |
| <input checked="" type="checkbox"/> | H10 |             | Unknown     | 1.00  | 1.00       |        |
| <input checked="" type="checkbox"/> | H11 |             | Unknown     | 1.00  | 1.00       |        |
| <input checked="" type="checkbox"/> | H12 |             | Unknown     | 1.00  | 1.00       |        |

| Group                               |     | Unknown     |             |       |            |        |
|-------------------------------------|-----|-------------|-------------|-------|------------|--------|
| Inc                                 | Pos | Sample Name | Sample Type | Score | Resolution | Status |
| <input checked="" type="checkbox"/> | D1  | FCER1A 115  | Unknown     | 0.67  | 0.10       |        |

### Melting Curves

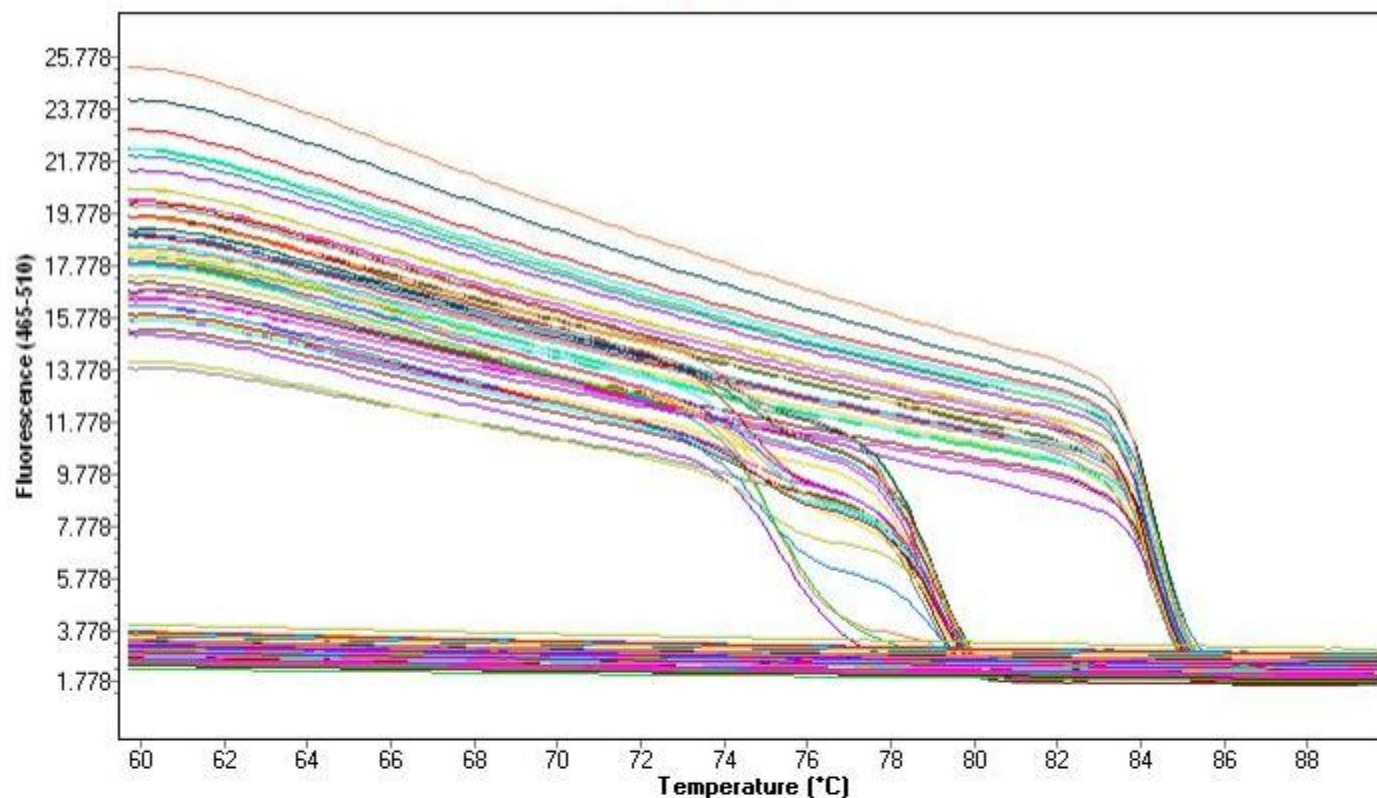

### Melting Peaks

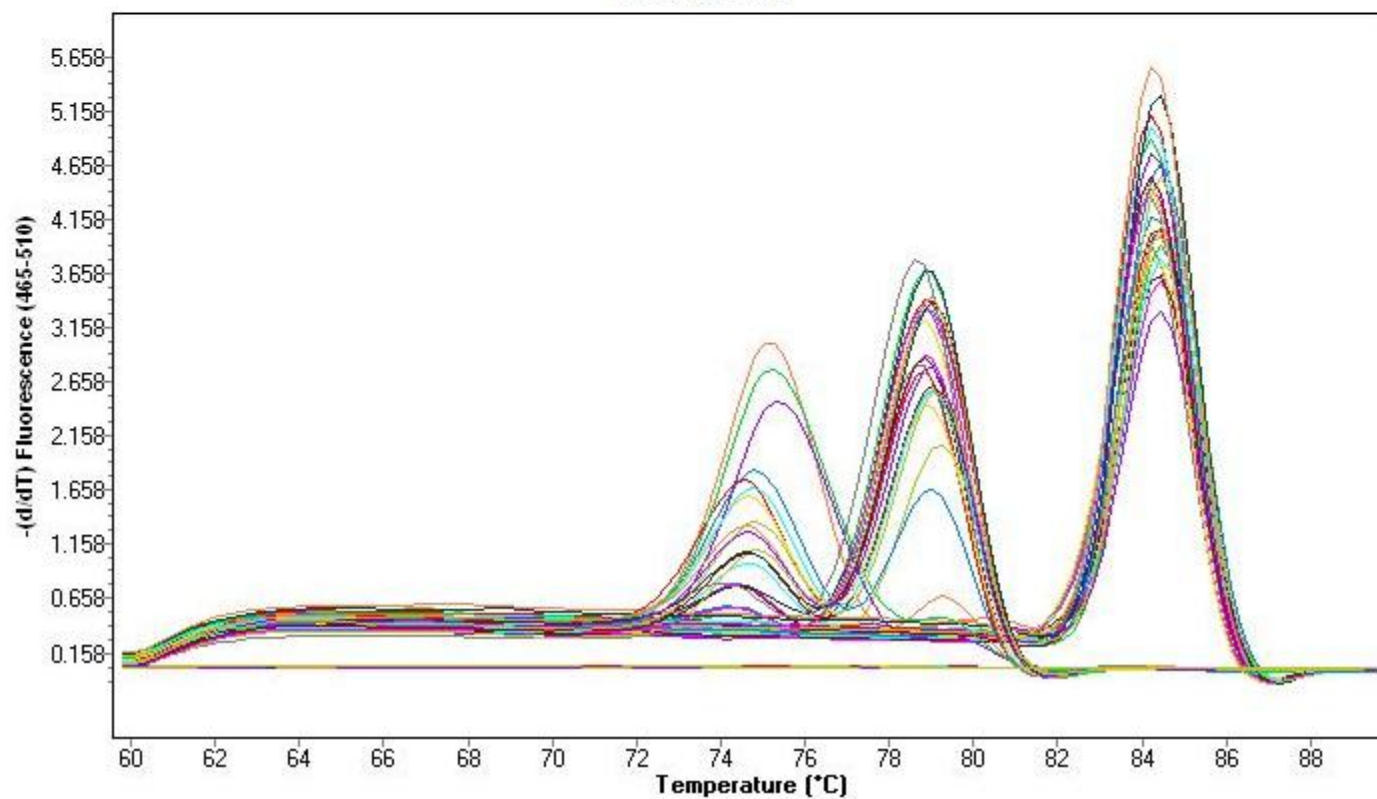

### Analysis Notes

## Tm Calling for All Samples (Tm Calling)

### Settings

|                |             |                    |          |
|----------------|-------------|--------------------|----------|
| Channel        | 465-510     | Color Compensation | Off      |
| Program        | Program     |                    |          |
| Show Shoulders | False       | Chemistry          | HybProbe |
|                |             | Max Peaks          | 2        |
| Subset Name    | All Samples |                    |          |

### Results

| Inc                                 | Pos | Sample Name | Peak 1 |       |       |        | Peak 2 |      |       |        | Status |
|-------------------------------------|-----|-------------|--------|-------|-------|--------|--------|------|-------|--------|--------|
|                                     |     |             | Tm     | Area  | Width | Height | Tm     | Area | Width | Height |        |
| <input checked="" type="checkbox"/> | A1  | GAPDH 102   | 84.55  | 11.02 | 2.27  | 4.86   |        |      |       |        |        |
| <input checked="" type="checkbox"/> | A2  | GAPDH 102   | 84.45  | 9.44  | 2.19  | 4.30   |        |      |       |        |        |
| <input checked="" type="checkbox"/> | A3  | GAPDH 102   | 84.53  | 8.80  | 2.18  | 4.04   |        |      |       |        |        |
| <input checked="" type="checkbox"/> | A4  | GAPDH 107   | 84.51  | 8.59  | 2.29  | 3.75   |        |      |       |        |        |
| <input checked="" type="checkbox"/> | A5  | GAPDH 107   | 84.25  | 8.70  | 2.13  | 4.08   |        |      |       |        |        |
| <input checked="" type="checkbox"/> | A6  | GAPDH 107   | 84.38  | 9.14  | 2.26  | 3.94   |        |      |       |        |        |
| <input checked="" type="checkbox"/> | A7  | GAPDH 110   | 84.46  | 8.76  | 2.29  | 3.82   |        |      |       |        |        |
| <input checked="" type="checkbox"/> | A8  | GAPDH 110   | 84.53  | 9.09  | 2.31  | 3.94   |        |      |       |        |        |
| <input checked="" type="checkbox"/> | A9  | GAPDH 110   | 84.53  | 8.94  | 2.13  | 4.20   |        |      |       |        |        |
| <input checked="" type="checkbox"/> | A10 | GAPDH 113   | 84.48  | 8.88  | 2.11  | 4.20   |        |      |       |        |        |
| <input checked="" type="checkbox"/> | A11 | GAPDH 113   | 84.51  | 7.29  | 2.09  | 3.49   |        |      |       |        |        |
| <input checked="" type="checkbox"/> | A12 | GAPDH 113   | 84.59  | 8.69  | 2.06  | 4.21   |        |      |       |        |        |
| <input checked="" type="checkbox"/> | B1  | FCER1A 102  | 78.97  | 8.70  | 2.50  | 3.48   |        |      |       |        |        |
| <input checked="" type="checkbox"/> | B2  | FCER1A 102  | 78.94  | 8.80  | 2.47  | 3.56   |        |      |       |        |        |
| <input checked="" type="checkbox"/> | B3  | FCER1A 102  | 78.94  | 9.61  | 2.50  | 3.85   |        |      |       |        |        |
| <input checked="" type="checkbox"/> | B4  | FCER1A 107  | 74.26  | 0.99  | 1.94  | 0.51   | 78.91  | 7.35 | 2.44  | 3.01   |        |
| <input checked="" type="checkbox"/> | B5  | FCER1A 107  | 78.74  | 7.22  | 2.46  | 2.93   |        |      |       |        |        |
| <input checked="" type="checkbox"/> | B6  | FCER1A 107  | 78.86  | 8.08  | 2.42  | 3.34   |        |      |       |        |        |
| <input checked="" type="checkbox"/> | B7  | FCER1A 110  | 74.26  | 0.94  | 1.91  | 0.49   | 78.86  | 7.16 | 2.40  | 2.98   |        |
| <input checked="" type="checkbox"/> | B8  | FCER1A 110  | 74.61  | 1.41  | 1.97  | 0.72   | 79.09  | 6.49 | 2.44  | 2.66   |        |
| <input checked="" type="checkbox"/> | B9  | FCER1A 110  | 78.96  | 9.49  | 2.49  | 3.82   |        |      |       |        |        |
| <input checked="" type="checkbox"/> | B10 | FCER1A 113  | 75.30  | 8.23  | 2.69  | 3.06   | 79.43  | 1.58 | 2.25  | 0.70   |        |
| <input checked="" type="checkbox"/> | B11 | FCER1A 113  | 75.58  | 7.50  | 3.00  | 2.50   | 79.63  | 0.72 | 2.28  | 0.26   |        |
| <input checked="" type="checkbox"/> | B12 | FCER1A 113  | 74.85  | 1.75  | 1.94  | 0.90   | 79.27  | 5.06 | 2.36  | 2.15   |        |
| <input checked="" type="checkbox"/> | C1  | GAPDH 115   | 84.40  | 9.47  | 2.17  | 4.36   |        |      |       |        |        |
| <input checked="" type="checkbox"/> | C2  | GAPDH 115   | 84.31  | 11.56 | 2.17  | 5.33   |        |      |       |        |        |
| <input checked="" type="checkbox"/> | C3  | GAPDH 115   | 84.30  | 11.10 | 2.16  | 5.13   |        |      |       |        |        |
| <input checked="" type="checkbox"/> | C4  | GAPDH 117   | 84.30  | 10.51 | 2.26  | 4.64   |        |      |       |        |        |
| <input checked="" type="checkbox"/> | C5  | GAPDH 117   | 84.23  | 10.31 | 2.25  | 4.59   |        |      |       |        |        |

## Results

| Inc                                 | Pos | Sample Name | Peak 1 |       |       |        | Peak 2 |      |       |        | Status |
|-------------------------------------|-----|-------------|--------|-------|-------|--------|--------|------|-------|--------|--------|
|                                     |     |             | Tm     | Area  | Width | Height | Tm     | Area | Width | Height |        |
| <input checked="" type="checkbox"/> | C6  | GAPDH 117   | 84.20  | 10.45 | 2.25  | 4.64   |        |      |       |        |        |
| <input checked="" type="checkbox"/> | C7  | GAPDH 119   | 84.30  | 10.29 | 2.18  | 4.72   |        |      |       |        |        |
| <input checked="" type="checkbox"/> | C8  | GAPDH 119   | 84.35  | 11.26 | 2.20  | 5.15   |        |      |       |        |        |
| <input checked="" type="checkbox"/> | C9  | GAPDH 119   | 84.46  | 11.74 | 2.15  | 5.47   |        |      |       |        |        |
| <input checked="" type="checkbox"/> | C10 | GAPDH 120   | 84.37  | 12.68 | 2.18  | 5.82   |        |      |       |        |        |
| <input checked="" type="checkbox"/> | C11 | GAPDH 120   | 84.35  | 10.94 | 2.21  | 4.95   |        |      |       |        |        |
| <input checked="" type="checkbox"/> | C12 | GAPDH 120   | 84.53  | 10.23 | 2.16  | 4.73   |        |      |       |        |        |
| <input checked="" type="checkbox"/> | D1  | FCER1A 115  | 74.88  | 4.55  | 2.51  | 1.82   | 79.05  | 4.50 | 2.40  | 1.87   |        |
| <input checked="" type="checkbox"/> | D2  | FCER1A 115  | 74.55  | 3.35  | 2.27  | 1.47   | 78.85  | 6.80 | 2.38  | 2.85   |        |
| <input checked="" type="checkbox"/> | D3  | FCER1A 115  | 75.46  | 8.63  | 3.09  | 2.80   | 79.30  | 1.22 | 2.57  | 0.47   |        |
| <input checked="" type="checkbox"/> | D4  | FCER1A 117  | 78.87  | 8.56  | 2.46  | 3.49   |        |      |       |        |        |
| <input checked="" type="checkbox"/> | D5  | FCER1A 117  | 73.93  | 0.83  | 1.81  | 0.45   | 78.67  | 9.61 | 2.46  | 3.91   |        |
| <input checked="" type="checkbox"/> | D6  | FCER1A 117  | 74.70  | 2.95  | 2.20  | 1.34   | 78.97  | 6.20 | 2.46  | 2.52   |        |
| <input checked="" type="checkbox"/> | D7  | FCER1A 119  | 74.62  | 1.66  | 2.04  | 0.81   | 79.07  | 6.55 | 2.42  | 2.71   |        |
| <input checked="" type="checkbox"/> | D8  | FCER1A 119  | 74.79  | 3.22  | 2.26  | 1.42   | 79.06  | 6.36 | 2.39  | 2.67   |        |
| <input checked="" type="checkbox"/> | D9  | FCER1A 119  | 74.55  | 1.56  | 2.12  | 0.74   | 79.06  | 8.54 | 2.43  | 3.51   |        |
| <input checked="" type="checkbox"/> | D10 | FCER1A 120  | 74.55  | 2.07  | 2.10  | 0.98   | 79.02  | 8.61 | 2.44  | 3.54   |        |
| <input checked="" type="checkbox"/> | D11 | FCER1A 120  | 74.64  | 2.09  | 2.14  | 0.98   | 79.01  | 7.05 | 2.46  | 2.87   |        |
| <input checked="" type="checkbox"/> | D12 | FCER1A 120  | 74.83  | 2.31  | 2.07  | 1.11   | 79.17  | 6.46 | 2.43  | 2.66   |        |
| <input checked="" type="checkbox"/> | E1  |             |        |       |       |        |        |      |       |        |        |
| <input checked="" type="checkbox"/> | E2  |             |        |       |       |        |        |      |       |        |        |
| <input checked="" type="checkbox"/> | E3  |             |        |       |       |        |        |      |       |        |        |
| <input checked="" type="checkbox"/> | E4  |             |        |       |       |        |        |      |       |        |        |
| <input checked="" type="checkbox"/> | E5  |             |        |       |       |        |        |      |       |        |        |
| <input checked="" type="checkbox"/> | E6  |             |        |       |       |        |        |      |       |        |        |
| <input checked="" type="checkbox"/> | E7  |             |        |       |       |        |        |      |       |        |        |
| <input checked="" type="checkbox"/> | E8  |             |        |       |       |        |        |      |       |        |        |
| <input checked="" type="checkbox"/> | E9  |             |        |       |       |        |        |      |       |        |        |
| <input checked="" type="checkbox"/> | E10 |             |        |       |       |        |        |      |       |        |        |
| <input checked="" type="checkbox"/> | E11 |             |        |       |       |        |        |      |       |        |        |
| <input checked="" type="checkbox"/> | E12 |             |        |       |       |        |        |      |       |        |        |
| <input checked="" type="checkbox"/> | F1  |             |        |       |       |        |        |      |       |        |        |
| <input checked="" type="checkbox"/> | F2  |             |        |       |       |        |        |      |       |        |        |
| <input checked="" type="checkbox"/> | F3  |             |        |       |       |        |        |      |       |        |        |
| <input checked="" type="checkbox"/> | F4  |             |        |       |       |        |        |      |       |        |        |
| <input checked="" type="checkbox"/> | F5  |             |        |       |       |        |        |      |       |        |        |



---

**Results**

| Inc                                 | Pos | Sample Name | Peak 1 |      |       |        | Peak 2 |      |       |        | Status |
|-------------------------------------|-----|-------------|--------|------|-------|--------|--------|------|-------|--------|--------|
|                                     |     |             | Tm     | Area | Width | Height | Tm     | Area | Width | Height |        |
| <input checked="" type="checkbox"/> | F6  |             |        |      |       |        |        |      |       |        |        |
| <input checked="" type="checkbox"/> | F7  |             |        |      |       |        |        |      |       |        |        |
| <input checked="" type="checkbox"/> | F8  |             |        |      |       |        |        |      |       |        |        |
| <input checked="" type="checkbox"/> | F9  |             |        |      |       |        |        |      |       |        |        |
| <input checked="" type="checkbox"/> | F10 |             |        |      |       |        |        |      |       |        |        |
| <input checked="" type="checkbox"/> | F11 |             |        |      |       |        |        |      |       |        |        |
| <input checked="" type="checkbox"/> | F12 |             |        |      |       |        |        |      |       |        |        |
| <input checked="" type="checkbox"/> | G1  |             |        |      |       |        |        |      |       |        |        |
| <input checked="" type="checkbox"/> | G2  |             |        |      |       |        |        |      |       |        |        |
| <input checked="" type="checkbox"/> | G3  |             |        |      |       |        |        |      |       |        |        |
| <input checked="" type="checkbox"/> | G4  |             |        |      |       |        |        |      |       |        |        |
| <input checked="" type="checkbox"/> | G5  |             |        |      |       |        |        |      |       |        |        |
| <input checked="" type="checkbox"/> | G6  |             |        |      |       |        |        |      |       |        |        |
| <input checked="" type="checkbox"/> | G7  |             |        |      |       |        |        |      |       |        |        |
| <input checked="" type="checkbox"/> | G8  |             |        |      |       |        |        |      |       |        |        |
| <input checked="" type="checkbox"/> | G9  |             |        |      |       |        |        |      |       |        |        |
| <input checked="" type="checkbox"/> | G10 |             |        |      |       |        |        |      |       |        |        |
| <input checked="" type="checkbox"/> | G11 |             |        |      |       |        |        |      |       |        |        |
| <input checked="" type="checkbox"/> | G12 |             |        |      |       |        |        |      |       |        |        |
| <input checked="" type="checkbox"/> | H1  |             |        |      |       |        |        |      |       |        |        |
| <input checked="" type="checkbox"/> | H2  |             |        |      |       |        |        |      |       |        |        |
| <input checked="" type="checkbox"/> | H3  |             |        |      |       |        |        |      |       |        |        |
| <input checked="" type="checkbox"/> | H4  |             |        |      |       |        |        |      |       |        |        |
| <input checked="" type="checkbox"/> | H5  |             |        |      |       |        |        |      |       |        |        |
| <input checked="" type="checkbox"/> | H6  |             |        |      |       |        |        |      |       |        |        |
| <input checked="" type="checkbox"/> | H7  |             |        |      |       |        |        |      |       |        |        |
| <input checked="" type="checkbox"/> | H8  |             |        |      |       |        |        |      |       |        |        |
| <input checked="" type="checkbox"/> | H9  |             |        |      |       |        |        |      |       |        |        |
| <input checked="" type="checkbox"/> | H10 |             |        |      |       |        |        |      |       |        |        |
| <input checked="" type="checkbox"/> | H11 |             |        |      |       |        |        |      |       |        |        |
| <input checked="" type="checkbox"/> | H12 |             |        |      |       |        |        |      |       |        |        |

### Melting Curves

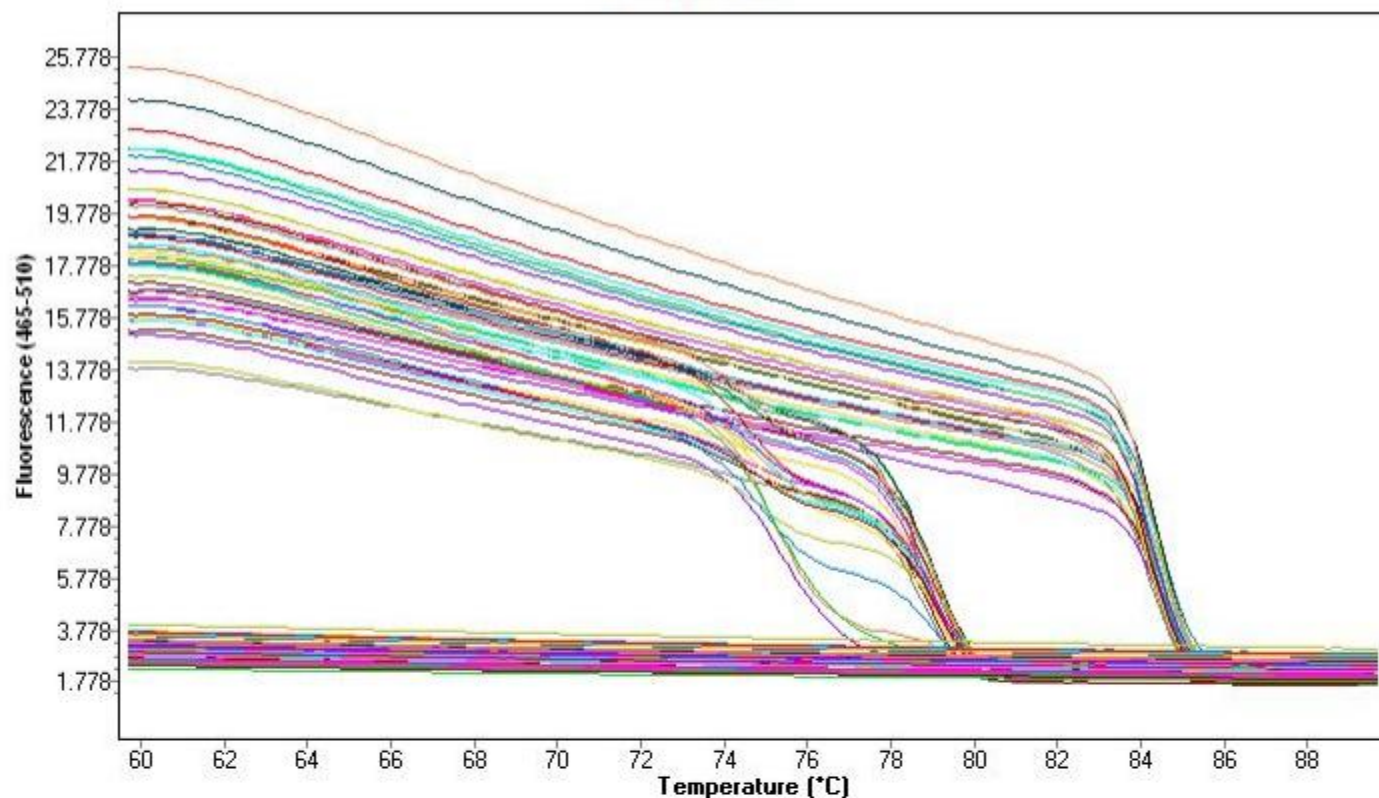

### Melting Peaks

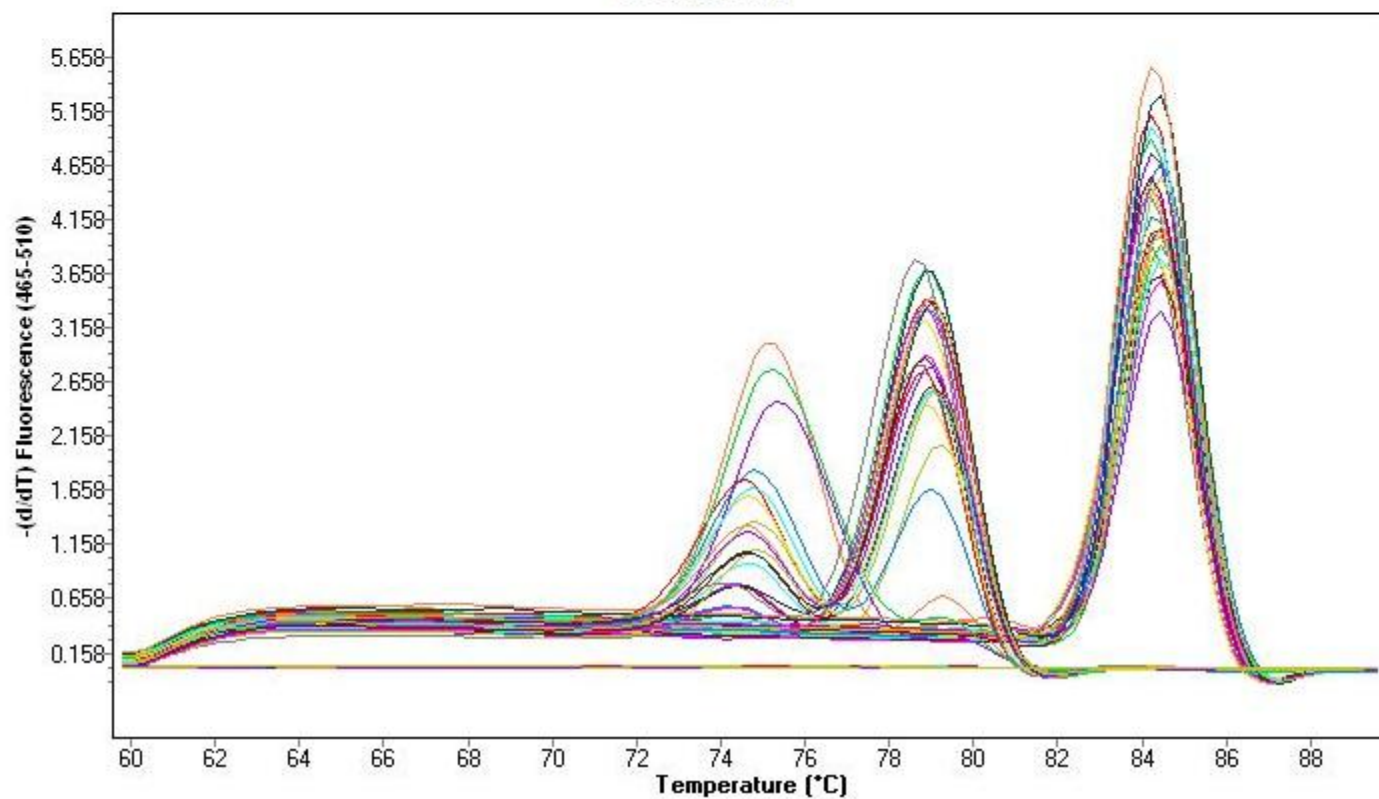

### Analysis Notes
