# Supplementary material for: Exploring differential gene expression and biomarker potential in systemic lupus erythematosus: a retrospective study
Source: PeerJ journal article supplement (doi:10.7717/peerj.19891), 2025-09-08
Supplement: qPCR.zip [file qPCR.zip]

# cobas® 4800 User Defined Workflow (UDF)

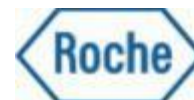

## 20241212xj plate3

### Experiment

|               |                       |                    |                                    |
|---------------|-----------------------|--------------------|------------------------------------|
| Creation Date | 12/12/2024 9:42:35 PM | Last Modified Date | 12/12/2024 10:45:43 PM             |
| Operator      | System Admin          | Owner              | System Admin                       |
| Start Time    | 12/12/2024 9:43:39 PM | End Time           | 12/12/2024 10:42:17 PM             |
| Run State     | Completed             | Software Version   | LCS480 1.5.1.62 SP3 - UDF 2.1.0.26 |
| Macro         |                       | Macro Owner        |                                    |
| Macro Status  |                       |                    |                                    |
| Templates     | gongying              | Plate ID           |                                    |
| Test ID       |                       | Lot ID             |                                    |
| Color Comp ID |                       |                    |                                    |
| Run Notes     |                       |                    |                                    |

### Programs

|              |         |               |      |
|--------------|---------|---------------|------|
| Program Name | Program |               |      |
| Cycles       | 1       | Analysis Mode | None |

| Target (°C) | Acquisition Mode | Hold (hh:mm:ss) | Ramp Rate (°C/s) | Acquisitions (per °C) | Sec Target (°C) | Step size (°C) | Step Delay (cycles) |
|-------------|------------------|-----------------|------------------|-----------------------|-----------------|----------------|---------------------|
| 95          | None             | 00:00:30        | 4.40             |                       | 0               | 0              | 0                   |

|              |         |               |                |
|--------------|---------|---------------|----------------|
| Program Name | Program |               |                |
| Cycles       | 40      | Analysis Mode | Quantification |

| Target (°C) | Acquisition Mode | Hold (hh:mm:ss) | Ramp Rate (°C/s) | Acquisitions (per °C) | Sec Target (°C) | Step size (°C) | Step Delay (cycles) |
|-------------|------------------|-----------------|------------------|-----------------------|-----------------|----------------|---------------------|
| 95          | None             | 00:00:15        | 4.40             |                       | 0               | 0              | 0                   |
| 60          | Single           | 00:00:30        | 2.20             |                       | 0               | 0              | 0                   |

|              |         |               |                |
|--------------|---------|---------------|----------------|
| Program Name | Program |               |                |
| Cycles       | 1       | Analysis Mode | Melting Curves |

| Target (°C) | Acquisition Mode | Hold (hh:mm:ss) | Ramp Rate (°C/s) | Acquisitions (per °C) | Sec Target (°C) | Step size (°C) | Step Delay (cycles) |
|-------------|------------------|-----------------|------------------|-----------------------|-----------------|----------------|---------------------|
| 95          | None             | 00:01:00        | 4.40             |                       | 0               | 0              | 0                   |
| 60          | None             | 00:00:30        | 2.20             |                       | 0               | 0              | 0                   |
| 90          | Continuous       |                 | 0.11             | 5                     | 0               | 0              | 0                   |

|              |         |               |      |
|--------------|---------|---------------|------|
| Program Name | Program |               |      |
| Cycles       | 1       | Analysis Mode | None |

| Target (°C) | Acquisition Mode | Hold (hh:mm:ss) | Ramp Rate (°C/s) | Acquisitions (per °C) | Sec Target (°C) | Step size (°C) | Step Delay (cycles) |
|-------------|------------------|-----------------|------------------|-----------------------|-----------------|----------------|---------------------|
|-------------|------------------|-----------------|------------------|-----------------------|-----------------|----------------|---------------------|

| Target (°C) | Acquisition Mode | Hold (hh:mm:ss) | Ramp Rate (°C/s) | Acquisitions (per °C) | Sec Target (°C) | Step size (°C) | Step Delay (cycles) |
|-------------|------------------|-----------------|------------------|-----------------------|-----------------|----------------|---------------------|
| 40          | None             | 00:00:30        | 2.20             |                       | 0               | 0              | 0                   |

## Samples

| Sample Count |            | 96          |          |              |  |  |  |
|--------------|------------|-------------|----------|--------------|--|--|--|
| Subset       |            | All Samples |          |              |  |  |  |
| Pos          | Name       | ID          | Repl. Of | Sample Notes |  |  |  |
| A1           | GAPDH 102  |             |          |              |  |  |  |
| A2           | GAPDH 102  |             |          |              |  |  |  |
| A3           | GAPDH 102  |             |          |              |  |  |  |
| A4           | GAPDH 107  |             |          |              |  |  |  |
| A5           | GAPDH 107  |             |          |              |  |  |  |
| A6           | GAPDH 107  |             |          |              |  |  |  |
| A7           | GAPDH 110  |             |          |              |  |  |  |
| A8           | GAPDH 110  |             |          |              |  |  |  |
| A9           | GAPDH 110  |             |          |              |  |  |  |
| A10          | GAPDH 113  |             |          |              |  |  |  |
| A11          | GAPDH 113  |             |          |              |  |  |  |
| A12          | GAPDH 113  |             |          |              |  |  |  |
| B1           | FCER1A 102 |             |          |              |  |  |  |
| B2           | FCER1A 102 |             |          |              |  |  |  |
| B3           | FCER1A 102 |             |          |              |  |  |  |
| B4           | FCER1A 107 |             |          |              |  |  |  |
| B5           | FCER1A 107 |             |          |              |  |  |  |
| B6           | FCER1A 107 |             |          |              |  |  |  |
| B7           | FCER1A 110 |             |          |              |  |  |  |
| B8           | FCER1A 110 |             |          |              |  |  |  |
| B9           | FCER1A 110 |             |          |              |  |  |  |
| B10          | FCER1A 113 |             |          |              |  |  |  |
| B11          | FCER1A 113 |             |          |              |  |  |  |
| B12          | FCER1A 113 |             |          |              |  |  |  |
| C1           | RGS1 102   |             |          |              |  |  |  |
| C2           | RGS1 102   |             |          |              |  |  |  |
| C3           | RGS1 102   |             |          |              |  |  |  |
| C4           | RGS1 107   |             |          |              |  |  |  |
| C5           | RGS1 107   |             |          |              |  |  |  |
| C6           | RGS1 107   |             |          |              |  |  |  |
| C7           | RGS1 110   |             |          |              |  |  |  |
| C8           | RGS1 110   |             |          |              |  |  |  |
| C9           | RGS1 110   |             |          |              |  |  |  |
| C10          | RGS1 113   |             |          |              |  |  |  |
| C11          | RGS1 113   |             |          |              |  |  |  |
| C12          | RGS1 113   |             |          |              |  |  |  |

## Samples

| Sample Count | 96          |    |          |              |
|--------------|-------------|----|----------|--------------|
| Subset       | All Samples |    |          |              |
| Pos          | Name        | ID | Repl. Of | Sample Notes |
| D1           | GAPDH 115   |    |          |              |
| D2           | GAPDH 115   |    |          |              |
| D3           | GAPDH 115   |    |          |              |
| D4           | GAPDH 117   |    |          |              |
| D5           | GAPDH 117   |    |          |              |
| D6           | GAPDH 117   |    |          |              |
| D7           | GAPDH 119   |    |          |              |
| D8           | GAPDH 119   |    |          |              |
| D9           | GAPDH 119   |    |          |              |
| D10          | GAPDH 120   |    |          |              |
| D11          | GAPDH 120   |    |          |              |
| D12          | GAPDH 120   |    |          |              |
| E1           | FCER1A 115  |    |          |              |
| E2           | FCER1A 115  |    |          |              |
| E3           | FCER1A 115  |    |          |              |
| E4           | FCER1A 117  |    |          |              |
| E5           | FCER1A 117  |    |          |              |
| E6           | FCER1A 117  |    |          |              |
| E7           | FCER1A 119  |    |          |              |
| E8           | FCER1A 119  |    |          |              |
| E9           | FCER1A 119  |    |          |              |
| E10          | FCER1A 120  |    |          |              |
| E11          | FCER1A 120  |    |          |              |
| E12          | FCER1A 120  |    |          |              |
| F1           | RGS1 102    |    |          |              |
| F2           | RGS1 102    |    |          |              |
| F3           | RGS1 102    |    |          |              |
| F4           | RGS1 107    |    |          |              |
| F5           | RGS1 107    |    |          |              |
| F6           | RGS1 107    |    |          |              |
| F7           | RGS1 110    |    |          |              |
| F8           | RGS1 110    |    |          |              |
| F9           | RGS1 110    |    |          |              |
| F10          | RGS1 113    |    |          |              |
| F11          | RGS1 113    |    |          |              |
| F12          | RGS1 113    |    |          |              |
| G1           |             |    |          |              |
| G2           |             |    |          |              |
| G3           |             |    |          |              |

Samples

|              |             |    |          |              |  |
|--------------|-------------|----|----------|--------------|--|
| Sample Count | 96          |    |          |              |  |
| Subset       | All Samples |    |          |              |  |
| Pos          | Name        | ID | Repl. Of | Sample Notes |  |
| G4           |             |    |          |              |  |
| G5           |             |    |          |              |  |
| G6           |             |    |          |              |  |
| G7           |             |    |          |              |  |
| G8           |             |    |          |              |  |
| G9           |             |    |          |              |  |
| G10          |             |    |          |              |  |
| G11          |             |    |          |              |  |
| G12          |             |    |          |              |  |
| H1           |             |    |          |              |  |
| H2           |             |    |          |              |  |
| H3           |             |    |          |              |  |
| H4           |             |    |          |              |  |
| H5           |             |    |          |              |  |
| H6           |             |    |          |              |  |
| H7           |             |    |          |              |  |
| H8           |             |    |          |              |  |
| H9           |             |    |          |              |  |
| H10          |             |    |          |              |  |
| H11          |             |    |          |              |  |
| H12          |             |    |          |              |  |

Instrument

|      |      |               |       |
|------|------|---------------|-------|
| Name | Z480 | Serial Number | 56319 |
|------|------|---------------|-------|

Revision History

|          |      |      |        |
|----------|------|------|--------|
| Revision | Date | User | Reason |
|          |      |      |        |

Abs Quant/2nd Derivative Max for All Samples (Abs Quant/2nd Derivative Max)

Settings

|                    |                 |  |       |  |
|--------------------|-----------------|--|-------|--|
| Channel            | 465-510         |  |       |  |
| Color Compensation | Off             |  |       |  |
| Program            | Program         |  | Units |  |
| Mode               | High Confidence |  |       |  |

|             |             |
|-------------|-------------|
| Subset Name | All Samples |
|-------------|-------------|

Results

|                                                            |      |    |               |          |        |
|------------------------------------------------------------|------|----|---------------|----------|--------|
| > -Note CP posal N(lasmtive cycles) has higher uncertainty | Type | CP | Concentration | Standard | Status |
|------------------------------------------------------------|------|----|---------------|----------|--------|

## Results

| Inc                                 | Pos | Name       | Type    | CP    | Concentration | Standard | Status |
|-------------------------------------|-----|------------|---------|-------|---------------|----------|--------|
| <input checked="" type="checkbox"/> | A1  | GAPDH 102  | Unknown | 35.00 |               |          | >      |
| <input checked="" type="checkbox"/> | A2  | GAPDH 102  | Unknown | 35.00 |               |          | >      |
| <input checked="" type="checkbox"/> | A3  | GAPDH 102  | Unknown | 35.00 |               |          | >      |
| <input checked="" type="checkbox"/> | A4  | GAPDH 107  | Unknown | 22.72 |               |          |        |
| <input checked="" type="checkbox"/> | A5  | GAPDH 107  | Unknown | 22.64 |               |          |        |
| <input checked="" type="checkbox"/> | A6  | GAPDH 107  | Unknown | 22.78 |               |          |        |
| <input checked="" type="checkbox"/> | A7  | GAPDH 110  | Unknown | 21.66 |               |          |        |
| <input checked="" type="checkbox"/> | A8  | GAPDH 110  | Unknown | 21.67 |               |          |        |
| <input checked="" type="checkbox"/> | A9  | GAPDH 110  | Unknown | 21.74 |               |          |        |
| <input checked="" type="checkbox"/> | A10 | GAPDH 113  | Unknown | 26.50 |               |          |        |
| <input checked="" type="checkbox"/> | A11 | GAPDH 113  | Unknown | 26.70 |               |          |        |
| <input checked="" type="checkbox"/> | A12 | GAPDH 113  | Unknown | 26.75 |               |          |        |
| <input checked="" type="checkbox"/> | B1  | FCER1A 102 | Unknown |       |               |          |        |
| <input checked="" type="checkbox"/> | B2  | FCER1A 102 | Unknown |       |               |          |        |
| <input checked="" type="checkbox"/> | B3  | FCER1A 102 | Unknown |       |               |          |        |
| <input checked="" type="checkbox"/> | B4  | FCER1A 107 | Unknown | 29.61 |               |          |        |
| <input checked="" type="checkbox"/> | B5  | FCER1A 107 | Unknown | 31.26 |               |          |        |
| <input checked="" type="checkbox"/> | B6  | FCER1A 107 | Unknown | 35.00 |               |          | >      |
| <input checked="" type="checkbox"/> | B7  | FCER1A 110 | Unknown | 32.68 |               |          |        |
| <input checked="" type="checkbox"/> | B8  | FCER1A 110 | Unknown | 32.25 |               |          |        |
| <input checked="" type="checkbox"/> | B9  | FCER1A 110 | Unknown | 29.76 |               |          |        |
| <input checked="" type="checkbox"/> | B10 | FCER1A 113 | Unknown | 28.76 |               |          |        |
| <input checked="" type="checkbox"/> | B11 | FCER1A 113 | Unknown | 34.20 |               |          |        |
| <input checked="" type="checkbox"/> | B12 | FCER1A 113 | Unknown | 35.00 |               |          | >      |
| <input checked="" type="checkbox"/> | C1  | RGS1 102   | Unknown |       |               |          |        |
| <input checked="" type="checkbox"/> | C2  | RGS1 102   | Unknown |       |               |          |        |
| <input checked="" type="checkbox"/> | C3  | RGS1 102   | Unknown | 35.00 |               |          | >      |
| <input checked="" type="checkbox"/> | C4  | RGS1 107   | Unknown | 32.27 |               |          |        |
| <input checked="" type="checkbox"/> | C5  | RGS1 107   | Unknown | 31.94 |               |          |        |
| <input checked="" type="checkbox"/> | C6  | RGS1 107   | Unknown | 32.92 |               |          |        |
| <input checked="" type="checkbox"/> | C7  | RGS1 110   | Unknown | 31.90 |               |          |        |
| <input checked="" type="checkbox"/> | C8  | RGS1 110   | Unknown | 32.08 |               |          |        |
| <input checked="" type="checkbox"/> | C9  | RGS1 110   | Unknown | 32.79 |               |          |        |
| <input checked="" type="checkbox"/> | C10 | RGS1 113   | Unknown | 35.00 |               |          | >      |
| <input checked="" type="checkbox"/> | C11 | RGS1 113   | Unknown | 35.00 |               |          | >      |
| <input checked="" type="checkbox"/> | C12 | RGS1 113   | Unknown | 35.00 |               |          | >      |
| <input checked="" type="checkbox"/> | D1  | GAPDH 115  | Unknown | 21.75 |               |          |        |

> - Late Cp call (last five cycles) has higher uncertainty

## Results

| Inc                                 | Pos | Name       | Type    | CP    | Concentration | Standard | Status |
|-------------------------------------|-----|------------|---------|-------|---------------|----------|--------|
| <input checked="" type="checkbox"/> | D2  | GAPDH 115  | Unknown | 21.90 |               |          |        |
| <input checked="" type="checkbox"/> | D3  | GAPDH 115  | Unknown | 21.87 |               |          |        |
| <input checked="" type="checkbox"/> | D4  | GAPDH 117  | Unknown | 22.14 |               |          |        |
| <input checked="" type="checkbox"/> | D5  | GAPDH 117  | Unknown | 22.10 |               |          |        |
| <input checked="" type="checkbox"/> | D6  | GAPDH 117  | Unknown | 22.14 |               |          |        |
| <input checked="" type="checkbox"/> | D7  | GAPDH 119  | Unknown | 22.29 |               |          |        |
| <input checked="" type="checkbox"/> | D8  | GAPDH 119  | Unknown | 22.34 |               |          |        |
| <input checked="" type="checkbox"/> | D9  | GAPDH 119  | Unknown | 22.30 |               |          |        |
| <input checked="" type="checkbox"/> | D10 | GAPDH 120  | Unknown | 23.22 |               |          |        |
| <input checked="" type="checkbox"/> | D11 | GAPDH 120  | Unknown | 23.18 |               |          |        |
| <input checked="" type="checkbox"/> | D12 | GAPDH 120  | Unknown | 23.27 |               |          |        |
| <input checked="" type="checkbox"/> | E1  | FCER1A 115 | Unknown | 29.54 |               |          |        |
| <input checked="" type="checkbox"/> | E2  | FCER1A 115 | Unknown | 29.79 |               |          |        |
| <input checked="" type="checkbox"/> | E3  | FCER1A 115 | Unknown | 29.17 |               |          |        |
| <input checked="" type="checkbox"/> | E4  | FCER1A 117 | Unknown | 28.82 |               |          |        |
| <input checked="" type="checkbox"/> | E5  | FCER1A 117 | Unknown | 29.01 |               |          |        |
| <input checked="" type="checkbox"/> | E6  | FCER1A 117 | Unknown | 29.05 |               |          |        |
| <input checked="" type="checkbox"/> | E7  | FCER1A 119 | Unknown | 28.88 |               |          |        |
| <input checked="" type="checkbox"/> | E8  | FCER1A 119 | Unknown | 28.85 |               |          |        |
| <input checked="" type="checkbox"/> | E9  | FCER1A 119 | Unknown | 28.74 |               |          |        |
| <input checked="" type="checkbox"/> | E10 | FCER1A 120 | Unknown | 29.98 |               |          |        |
| <input checked="" type="checkbox"/> | E11 | FCER1A 120 | Unknown | 29.58 |               |          |        |
| <input checked="" type="checkbox"/> | E12 | FCER1A 120 | Unknown | 29.60 |               |          |        |
| <input checked="" type="checkbox"/> | F1  | RGS1 102   | Unknown | 30.86 |               |          |        |
| <input checked="" type="checkbox"/> | F2  | RGS1 102   | Unknown | 31.61 |               |          |        |
| <input checked="" type="checkbox"/> | F3  | RGS1 102   | Unknown | 29.98 |               |          |        |
| <input checked="" type="checkbox"/> | F4  | RGS1 107   | Unknown | 32.01 |               |          |        |
| <input checked="" type="checkbox"/> | F5  | RGS1 107   | Unknown | 31.96 |               |          |        |
| <input checked="" type="checkbox"/> | F6  | RGS1 107   | Unknown | 31.95 |               |          |        |
| <input checked="" type="checkbox"/> | F7  | RGS1 110   | Unknown | 31.95 |               |          |        |
| <input checked="" type="checkbox"/> | F8  | RGS1 110   | Unknown | 31.39 |               |          |        |
| <input checked="" type="checkbox"/> | F9  | RGS1 110   | Unknown | 31.38 |               |          |        |
| <input checked="" type="checkbox"/> | F10 | RGS1 113   | Unknown | 31.95 |               |          |        |
| <input checked="" type="checkbox"/> | F11 | RGS1 113   | Unknown | 31.48 |               |          |        |
| <input checked="" type="checkbox"/> | F12 | RGS1 113   | Unknown | 31.47 |               |          |        |
| <input checked="" type="checkbox"/> | G1  |            | Unknown |       |               |          |        |
| <input checked="" type="checkbox"/> | G2  |            | Unknown |       |               |          |        |

> - Late Cp call (last five cycles) has higher uncertainty

---

**Results**

| Inc                                 | Pos | Name | Type    | CP | Concentration | Standard | Status |
|-------------------------------------|-----|------|---------|----|---------------|----------|--------|
| <input checked="" type="checkbox"/> | G3  |      | Unknown |    |               |          |        |
| <input checked="" type="checkbox"/> | G4  |      | Unknown |    |               |          |        |
| <input checked="" type="checkbox"/> | G5  |      | Unknown |    |               |          |        |
| <input checked="" type="checkbox"/> | G6  |      | Unknown |    |               |          |        |
| <input checked="" type="checkbox"/> | G7  |      | Unknown |    |               |          |        |
| <input checked="" type="checkbox"/> | G8  |      | Unknown |    |               |          |        |
| <input checked="" type="checkbox"/> | G9  |      | Unknown |    |               |          |        |
| <input checked="" type="checkbox"/> | G10 |      | Unknown |    |               |          |        |
| <input checked="" type="checkbox"/> | G11 |      | Unknown |    |               |          |        |
| <input checked="" type="checkbox"/> | G12 |      | Unknown |    |               |          |        |
| <input checked="" type="checkbox"/> | H1  |      | Unknown |    |               |          |        |
| <input checked="" type="checkbox"/> | H2  |      | Unknown |    |               |          |        |
| <input checked="" type="checkbox"/> | H3  |      | Unknown |    |               |          |        |
| <input checked="" type="checkbox"/> | H4  |      | Unknown |    |               |          |        |
| <input checked="" type="checkbox"/> | H5  |      | Unknown |    |               |          |        |
| <input checked="" type="checkbox"/> | H6  |      | Unknown |    |               |          |        |
| <input checked="" type="checkbox"/> | H7  |      | Unknown |    |               |          |        |
| <input checked="" type="checkbox"/> | H8  |      | Unknown |    |               |          |        |
| <input checked="" type="checkbox"/> | H9  |      | Unknown |    |               |          |        |
| <input checked="" type="checkbox"/> | H10 |      | Unknown |    |               |          |        |
| <input checked="" type="checkbox"/> | H11 |      | Unknown |    |               |          |        |
| <input checked="" type="checkbox"/> | H12 |      | Unknown |    |               |          |        |

> - Late Cp call (last five cycles) has higher uncertainty

### Amplification Curves

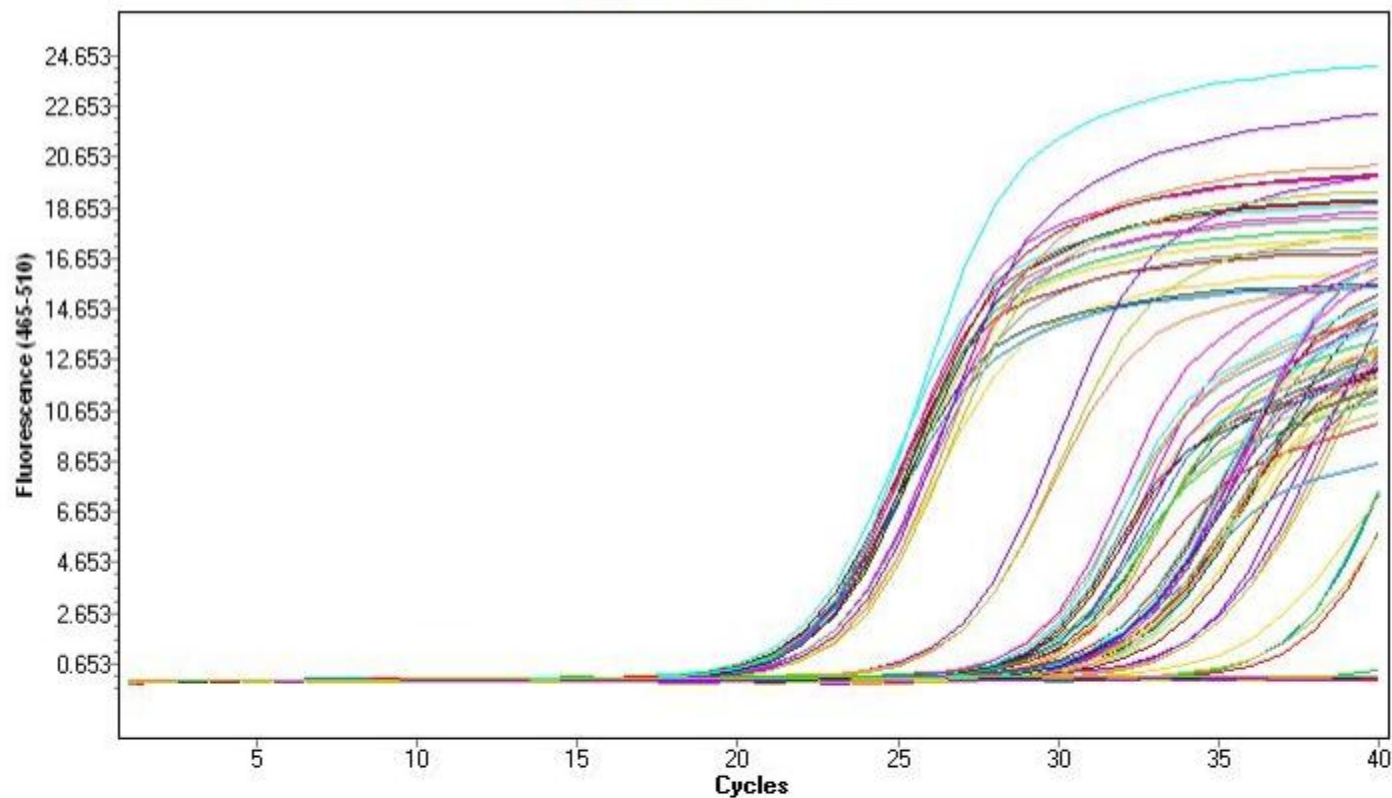

### Standard Curve

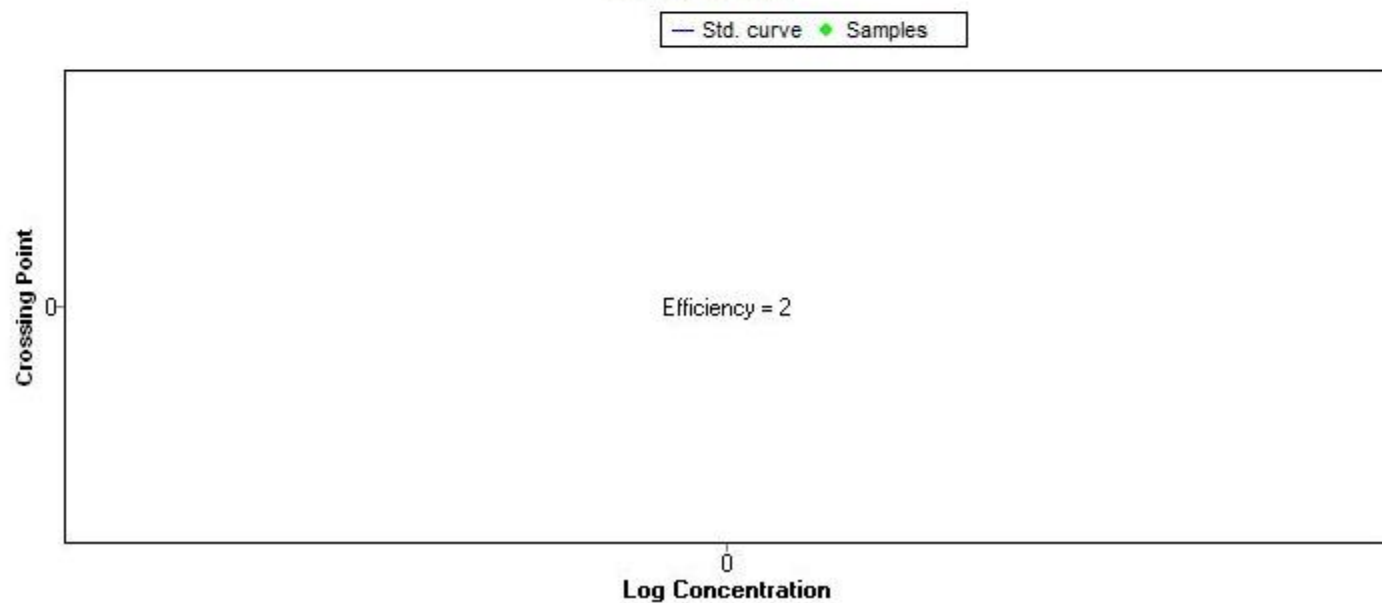

### Analysis Notes

Abs Quant/Fit Points for All Samples (Abs Quant/Fit Points)



## Settings

|                    |                       |                  |        |                    |         |  |
|--------------------|-----------------------|------------------|--------|--------------------|---------|--|
| Channel            | 465-510               |                  |        |                    |         |  |
| Color Compensation | Off                   |                  |        |                    |         |  |
| Standard Curve     | Set Efficiency (2.00) |                  |        |                    |         |  |
| Program            | Program               |                  |        |                    | Units   |  |
| First Cycle        | 1                     | Last Cycle       | 40     | Background         | 2-6     |  |
| Noiseband Method   | Auto                  | Noiseband        | 0.4336 | STD Dev Multiplier | 12.0000 |  |
| # of Fit Points    | 2                     | Threshold Method | Auto   | Threshold          | 0.4336  |  |

|             |             |
|-------------|-------------|
| Subset Name | All Samples |
|-------------|-------------|

## Results

| Inc                                 | Pos | Name       | Type    | CP    | Concentration | Standard | Status |
|-------------------------------------|-----|------------|---------|-------|---------------|----------|--------|
| <input checked="" type="checkbox"/> | A1  | GAPDH 102  | Unknown | 33.00 |               |          |        |
| <input checked="" type="checkbox"/> | A2  | GAPDH 102  | Unknown | 34.34 |               |          |        |
| <input checked="" type="checkbox"/> | A3  | GAPDH 102  | Unknown | 33.84 |               |          |        |
| <input checked="" type="checkbox"/> | A4  | GAPDH 107  | Unknown | 19.29 |               |          |        |
| <input checked="" type="checkbox"/> | A5  | GAPDH 107  | Unknown | 19.11 |               |          |        |
| <input checked="" type="checkbox"/> | A6  | GAPDH 107  | Unknown | 19.59 |               |          |        |
| <input checked="" type="checkbox"/> | A7  | GAPDH 110  | Unknown | 18.42 |               |          |        |
| <input checked="" type="checkbox"/> | A8  | GAPDH 110  | Unknown | 17.61 |               |          |        |
| <input checked="" type="checkbox"/> | A9  | GAPDH 110  | Unknown | 18.65 |               |          |        |
| <input checked="" type="checkbox"/> | A10 | GAPDH 113  | Unknown | 23.34 |               |          |        |
| <input checked="" type="checkbox"/> | A11 | GAPDH 113  | Unknown | 21.56 |               |          |        |
| <input checked="" type="checkbox"/> | A12 | GAPDH 113  | Unknown | 21.63 |               |          |        |
| <input checked="" type="checkbox"/> | B1  | FCER1A 102 | Unknown |       |               |          |        |
| <input checked="" type="checkbox"/> | B2  | FCER1A 102 | Unknown |       |               |          |        |
| <input checked="" type="checkbox"/> | B3  | FCER1A 102 | Unknown |       |               |          |        |
| <input checked="" type="checkbox"/> | B4  | FCER1A 107 | Unknown | 26.12 |               |          |        |
| <input checked="" type="checkbox"/> | B5  | FCER1A 107 | Unknown | 27.67 |               |          |        |
| <input checked="" type="checkbox"/> | B6  | FCER1A 107 | Unknown | 30.97 |               |          |        |
| <input checked="" type="checkbox"/> | B7  | FCER1A 110 | Unknown | 28.77 |               |          |        |
| <input checked="" type="checkbox"/> | B8  | FCER1A 110 | Unknown | 27.88 |               |          |        |
| <input checked="" type="checkbox"/> | B9  | FCER1A 110 | Unknown | 26.67 |               |          |        |
| <input checked="" type="checkbox"/> | B10 | FCER1A 113 | Unknown | 25.29 |               |          |        |
| <input checked="" type="checkbox"/> | B11 | FCER1A 113 | Unknown | 29.37 |               |          |        |
| <input checked="" type="checkbox"/> | B12 | FCER1A 113 | Unknown | 32.81 |               |          |        |
| <input checked="" type="checkbox"/> | C1  | RGS1 102   | Unknown |       |               |          |        |
| <input checked="" type="checkbox"/> | C2  | RGS1 102   | Unknown |       |               |          |        |
| <input checked="" type="checkbox"/> | C3  | RGS1 102   | Unknown |       |               |          |        |

## Results

| Inc                                 | Pos | Name       | Type    | CP    | Concentration | Standard | Status |
|-------------------------------------|-----|------------|---------|-------|---------------|----------|--------|
| <input checked="" type="checkbox"/> | C4  | RGS1 107   | Unknown | 27.95 |               |          |        |
| <input checked="" type="checkbox"/> | C5  | RGS1 107   | Unknown | 27.29 |               |          |        |
| <input checked="" type="checkbox"/> | C6  | RGS1 107   | Unknown | 28.58 |               |          |        |
| <input checked="" type="checkbox"/> | C7  | RGS1 110   | Unknown | 26.91 |               |          |        |
| <input checked="" type="checkbox"/> | C8  | RGS1 110   | Unknown | 27.39 |               |          |        |
| <input checked="" type="checkbox"/> | C9  | RGS1 110   | Unknown | 27.50 |               |          |        |
| <input checked="" type="checkbox"/> | C10 | RGS1 113   | Unknown | 30.43 |               |          |        |
| <input checked="" type="checkbox"/> | C11 | RGS1 113   | Unknown | 28.65 |               |          |        |
| <input checked="" type="checkbox"/> | C12 | RGS1 113   | Unknown | 29.77 |               |          |        |
| <input checked="" type="checkbox"/> | D1  | GAPDH 115  | Unknown | 18.34 |               |          |        |
| <input checked="" type="checkbox"/> | D2  | GAPDH 115  | Unknown | 18.42 |               |          |        |
| <input checked="" type="checkbox"/> | D3  | GAPDH 115  | Unknown | 18.24 |               |          |        |
| <input checked="" type="checkbox"/> | D4  | GAPDH 117  | Unknown | 18.73 |               |          |        |
| <input checked="" type="checkbox"/> | D5  | GAPDH 117  | Unknown | 18.77 |               |          |        |
| <input checked="" type="checkbox"/> | D6  | GAPDH 117  | Unknown | 18.98 |               |          |        |
| <input checked="" type="checkbox"/> | D7  | GAPDH 119  | Unknown | 18.87 |               |          |        |
| <input checked="" type="checkbox"/> | D8  | GAPDH 119  | Unknown | 18.38 |               |          |        |
| <input checked="" type="checkbox"/> | D9  | GAPDH 119  | Unknown | 18.87 |               |          |        |
| <input checked="" type="checkbox"/> | D10 | GAPDH 120  | Unknown | 19.90 |               |          |        |
| <input checked="" type="checkbox"/> | D11 | GAPDH 120  | Unknown | 19.53 |               |          |        |
| <input checked="" type="checkbox"/> | D12 | GAPDH 120  | Unknown | 19.89 |               |          |        |
| <input checked="" type="checkbox"/> | E1  | FCER1A 115 | Unknown | 26.64 |               |          |        |
| <input checked="" type="checkbox"/> | E2  | FCER1A 115 | Unknown | 25.56 |               |          |        |
| <input checked="" type="checkbox"/> | E3  | FCER1A 115 | Unknown | 23.34 |               |          |        |
| <input checked="" type="checkbox"/> | E4  | FCER1A 117 | Unknown | 25.65 |               |          |        |
| <input checked="" type="checkbox"/> | E5  | FCER1A 117 | Unknown | 26.41 |               |          |        |
| <input checked="" type="checkbox"/> | E6  | FCER1A 117 | Unknown | 26.51 |               |          |        |
| <input checked="" type="checkbox"/> | E7  | FCER1A 119 | Unknown | 26.88 |               |          |        |
| <input checked="" type="checkbox"/> | E8  | FCER1A 119 | Unknown | 26.21 |               |          |        |
| <input checked="" type="checkbox"/> | E9  | FCER1A 119 | Unknown | 26.33 |               |          |        |
| <input checked="" type="checkbox"/> | E10 | FCER1A 120 | Unknown | 27.62 |               |          |        |
| <input checked="" type="checkbox"/> | E11 | FCER1A 120 | Unknown | 26.64 |               |          |        |
| <input checked="" type="checkbox"/> | E12 | FCER1A 120 | Unknown | 27.38 |               |          |        |
| <input checked="" type="checkbox"/> | F1  | RGS1 102   | Unknown | 27.36 |               |          |        |
| <input checked="" type="checkbox"/> | F2  | RGS1 102   | Unknown | 26.27 |               |          |        |
| <input checked="" type="checkbox"/> | F3  | RGS1 102   | Unknown | 26.67 |               |          |        |
| <input checked="" type="checkbox"/> | F4  | RGS1 107   | Unknown | 28.31 |               |          |        |

## Results

| Inc                                 | Pos | Name     | Type    | CP    | Concentration | Standard | Status |
|-------------------------------------|-----|----------|---------|-------|---------------|----------|--------|
| <input checked="" type="checkbox"/> | F5  | RGS1 107 | Unknown | 28.62 |               |          |        |
| <input checked="" type="checkbox"/> | F6  | RGS1 107 | Unknown | 28.78 |               |          |        |
| <input checked="" type="checkbox"/> | F7  | RGS1 110 | Unknown | 28.90 |               |          |        |
| <input checked="" type="checkbox"/> | F8  | RGS1 110 | Unknown | 28.47 |               |          |        |
| <input checked="" type="checkbox"/> | F9  | RGS1 110 | Unknown | 28.42 |               |          |        |
| <input checked="" type="checkbox"/> | F10 | RGS1 113 | Unknown | 29.67 |               |          |        |
| <input checked="" type="checkbox"/> | F11 | RGS1 113 | Unknown | 28.97 |               |          |        |
| <input checked="" type="checkbox"/> | F12 | RGS1 113 | Unknown | 29.19 |               |          |        |
| <input checked="" type="checkbox"/> | G1  |          | Unknown |       |               |          |        |
| <input checked="" type="checkbox"/> | G2  |          | Unknown |       |               |          |        |
| <input checked="" type="checkbox"/> | G3  |          | Unknown |       |               |          |        |
| <input checked="" type="checkbox"/> | G4  |          | Unknown |       |               |          |        |
| <input checked="" type="checkbox"/> | G5  |          | Unknown |       |               |          |        |
| <input checked="" type="checkbox"/> | G6  |          | Unknown |       |               |          |        |
| <input checked="" type="checkbox"/> | G7  |          | Unknown |       |               |          |        |
| <input checked="" type="checkbox"/> | G8  |          | Unknown |       |               |          |        |
| <input checked="" type="checkbox"/> | G9  |          | Unknown |       |               |          |        |
| <input checked="" type="checkbox"/> | G10 |          | Unknown |       |               |          |        |
| <input checked="" type="checkbox"/> | G11 |          | Unknown |       |               |          |        |
| <input checked="" type="checkbox"/> | G12 |          | Unknown |       |               |          |        |
| <input checked="" type="checkbox"/> | H1  |          | Unknown | 34.15 |               |          |        |
| <input checked="" type="checkbox"/> | H2  |          | Unknown |       |               |          |        |
| <input checked="" type="checkbox"/> | H3  |          | Unknown |       |               |          |        |
| <input checked="" type="checkbox"/> | H4  |          | Unknown |       |               |          |        |
| <input checked="" type="checkbox"/> | H5  |          | Unknown |       |               |          |        |
| <input checked="" type="checkbox"/> | H6  |          | Unknown |       |               |          |        |
| <input checked="" type="checkbox"/> | H7  |          | Unknown |       |               |          |        |
| <input checked="" type="checkbox"/> | H8  |          | Unknown |       |               |          |        |
| <input checked="" type="checkbox"/> | H9  |          | Unknown |       |               |          |        |
| <input checked="" type="checkbox"/> | H10 |          | Unknown |       |               |          |        |
| <input checked="" type="checkbox"/> | H11 |          | Unknown |       |               |          |        |
| <input checked="" type="checkbox"/> | H12 |          | Unknown |       |               |          |        |

**Amplification Curves**

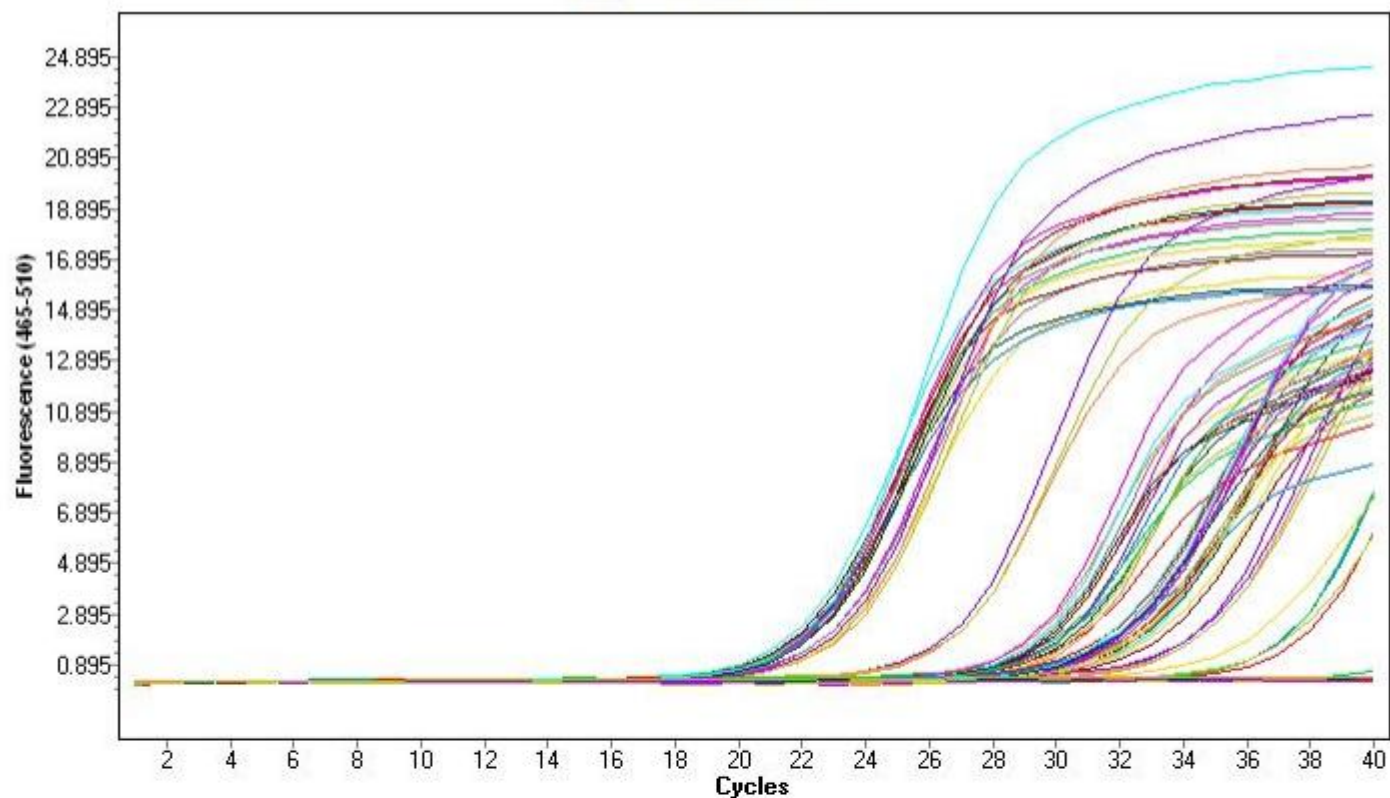

**Amplification Curves**

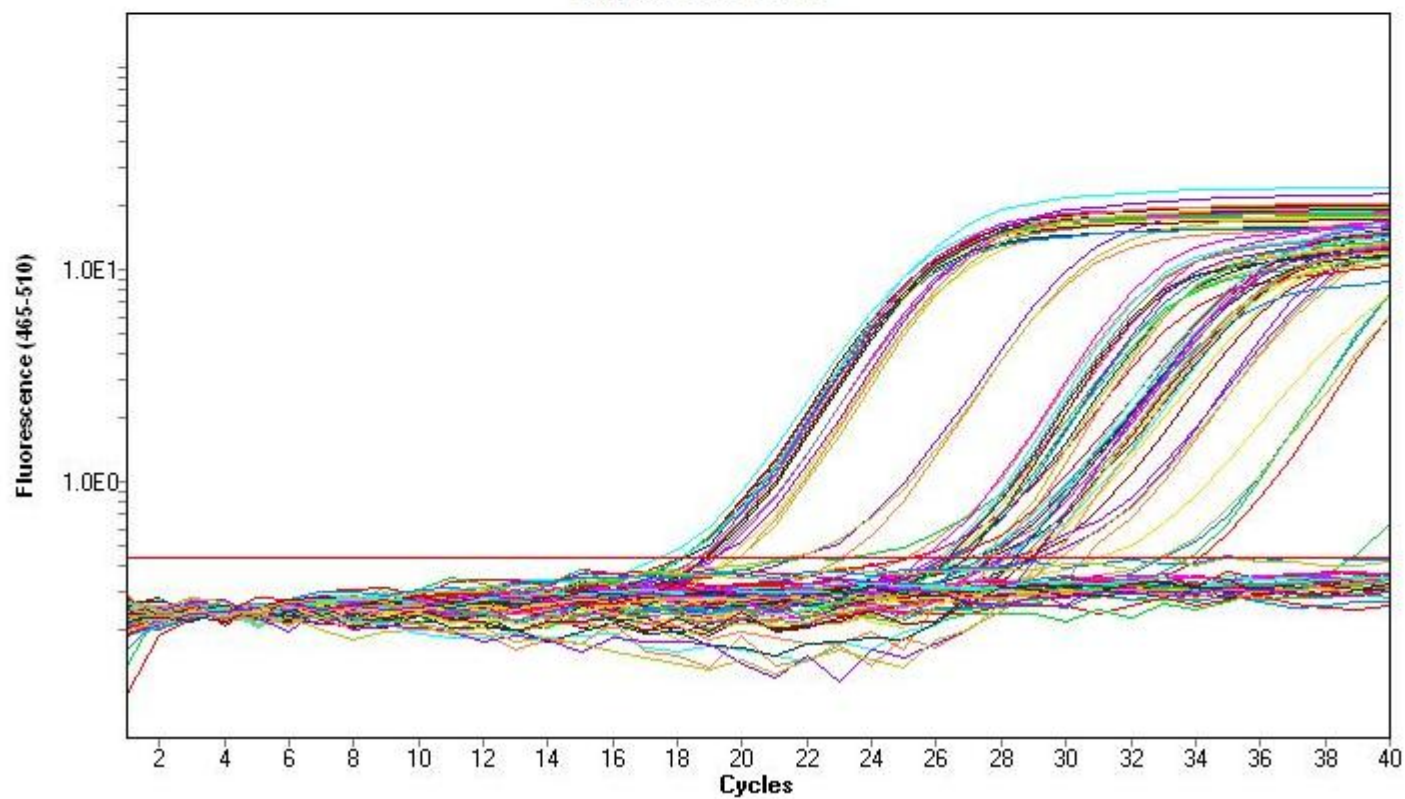

### Amplification Curves

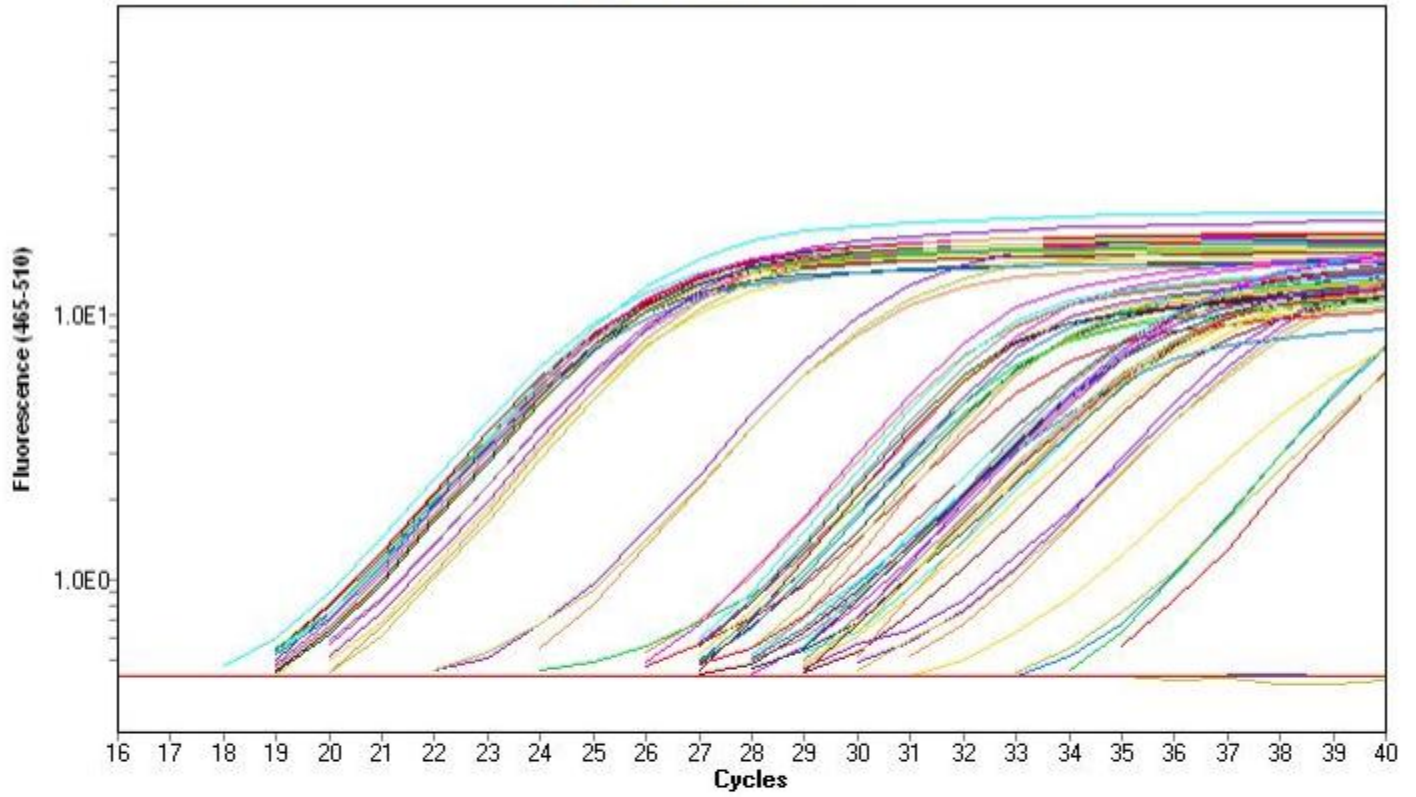

### Standard Curve

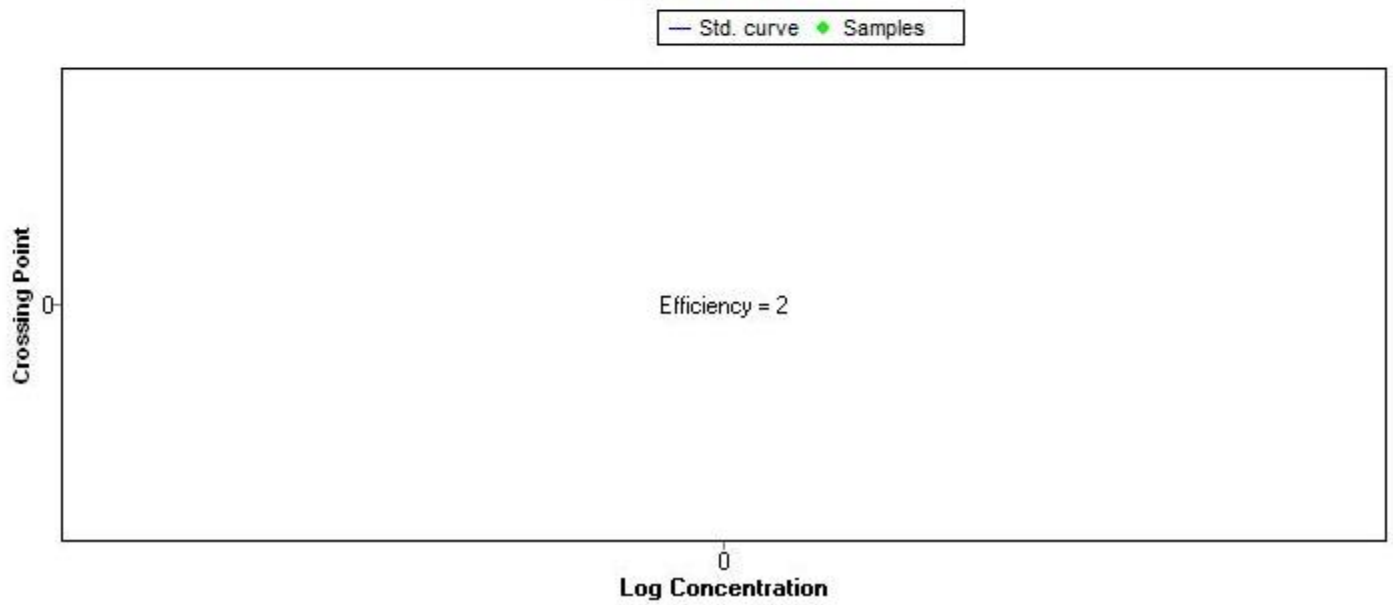

### Analysis Notes

### Melting Curves

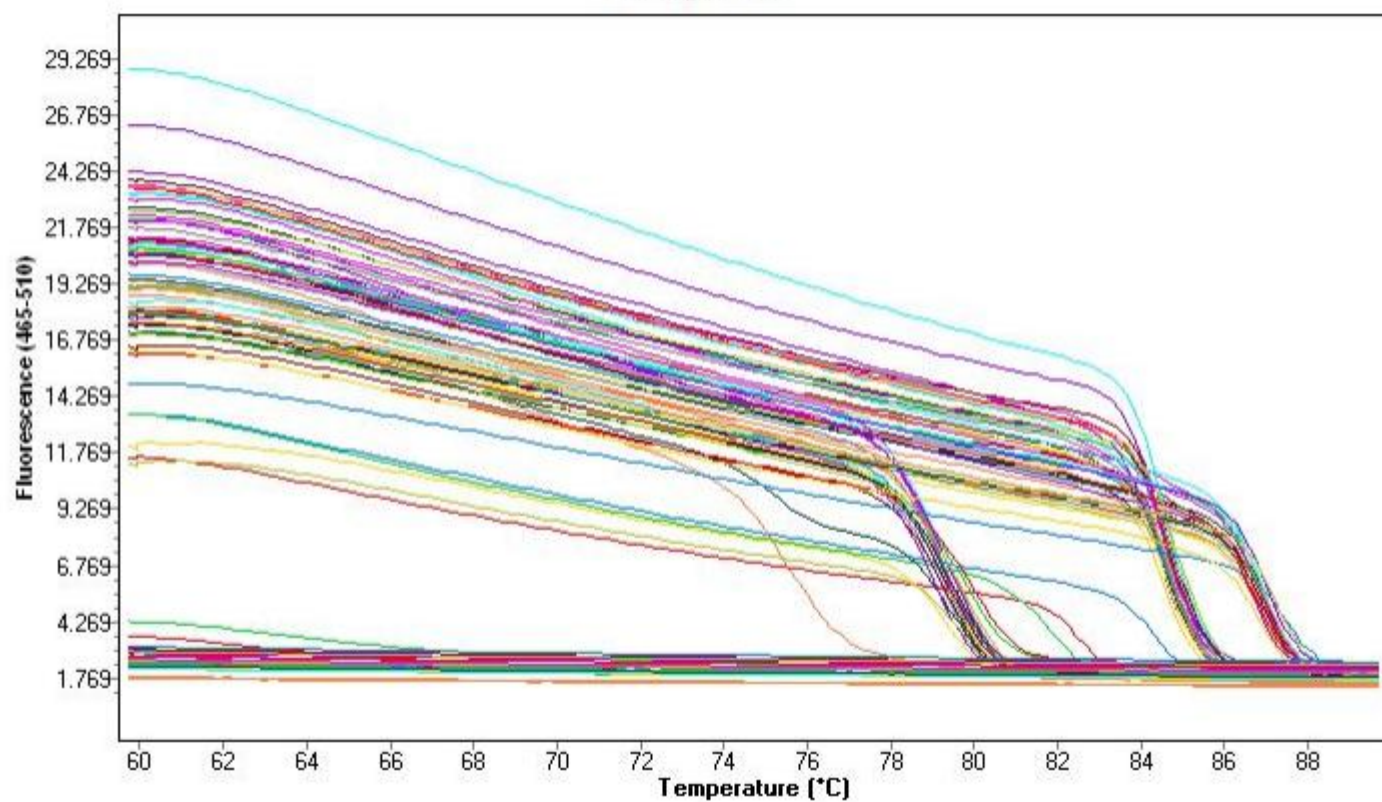

### Normalized Melting Curves

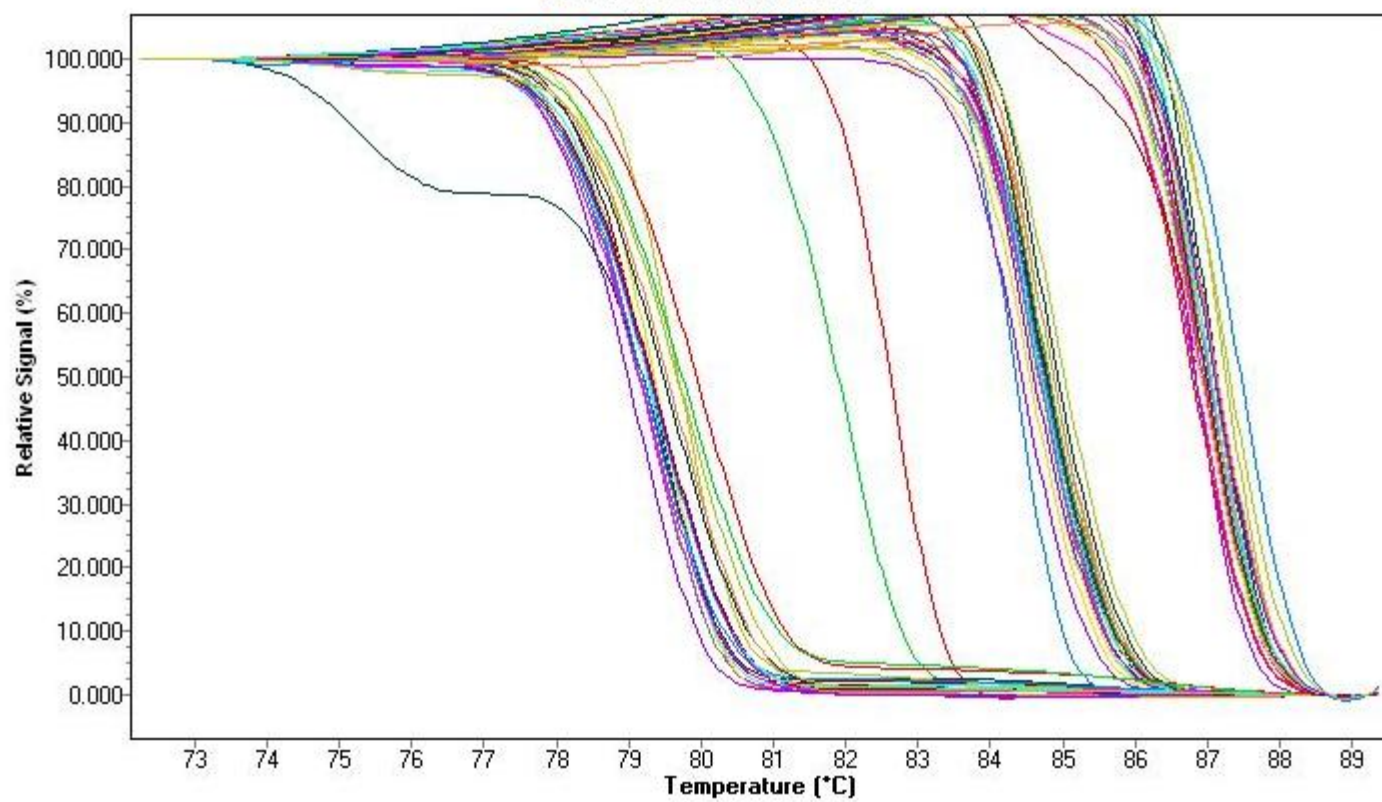



**Normalized and Shifted Melting Curves**

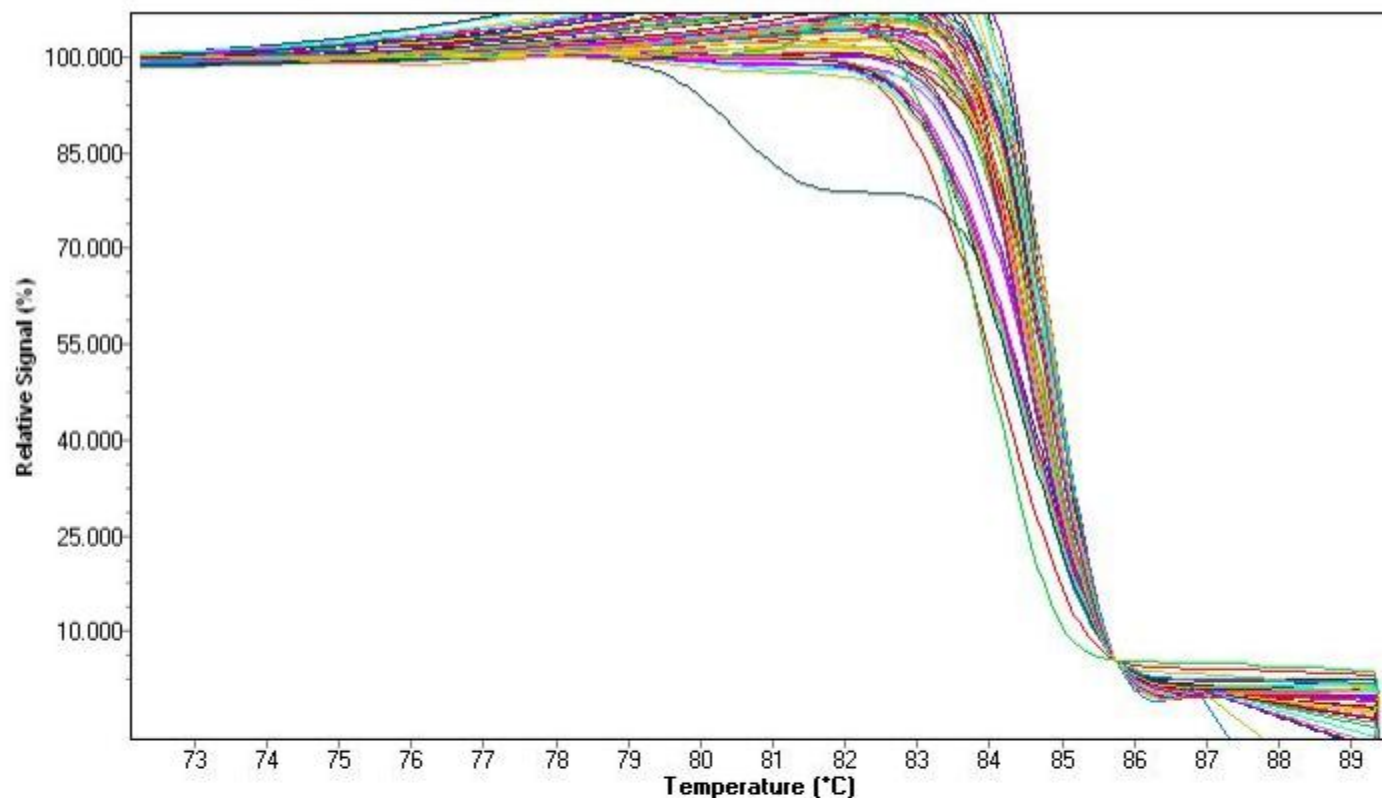

**Normalized and Temp-Shifted Difference Plot**

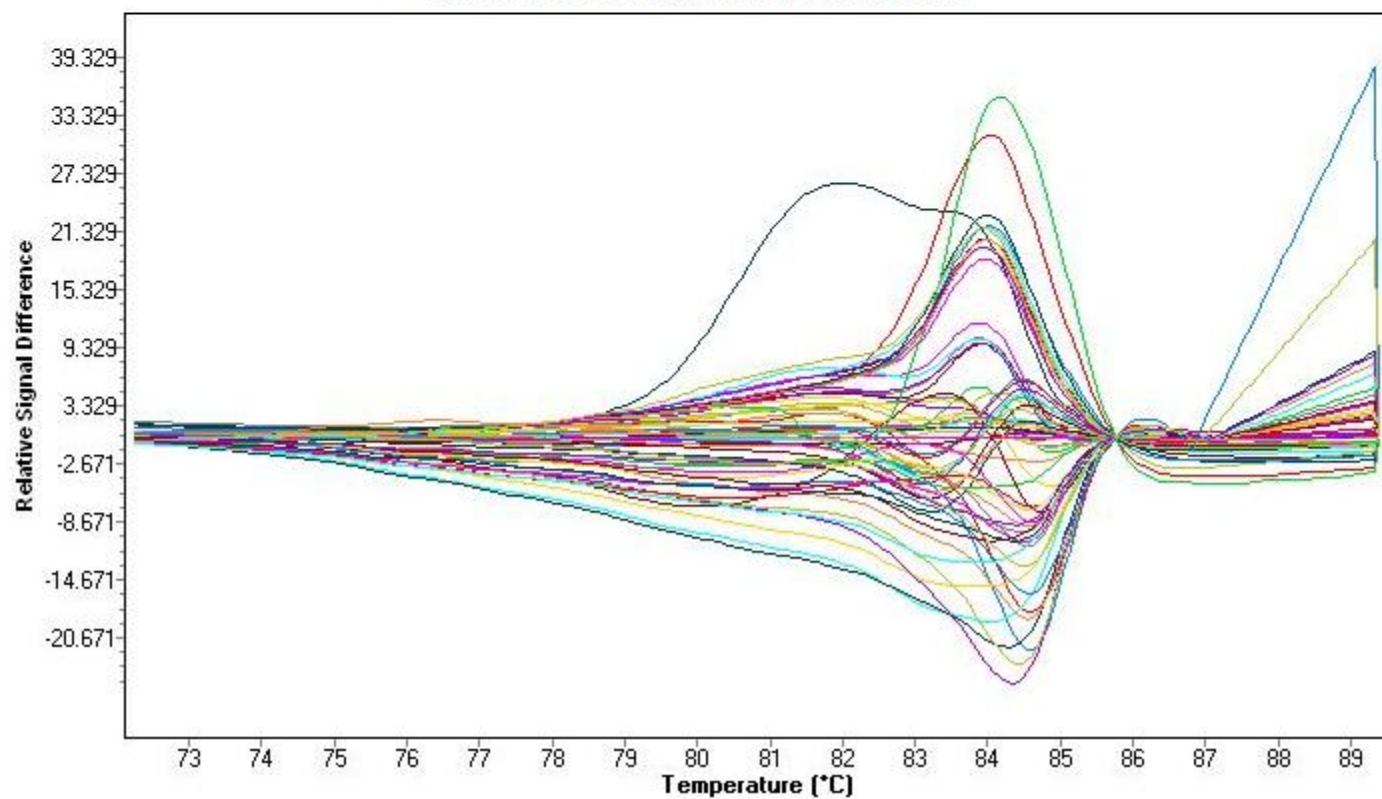

**Analysis Notes**

## Melt Curve Genotyping for All Samples (Melt Curve Genotyping)

|                |            |                    |       |
|----------------|------------|--------------------|-------|
| Channel        | 465-510    | Color Compensation | Off   |
| Program Name   | Program    |                    |       |
| Std's Settings | Auto-Group |                    |       |
| Sensitivity    | Normal     | Temp Range         | 63-86 |
|                |            | Score              | 0.7   |
|                |            | Res                | 0.1   |

|             |             |
|-------------|-------------|
| Subset Name | All Samples |
|-------------|-------------|

### Results

| Inc                                 | Pos. | Sample Name | Sample Type | Group   | Score | Resolution | Status |
|-------------------------------------|------|-------------|-------------|---------|-------|------------|--------|
| <input checked="" type="checkbox"/> | A1   | GAPDH 102   | Unknown     | 4       | 0.99  | 0.28       |        |
| <input checked="" type="checkbox"/> | A2   | GAPDH 102   | Unknown     | 4       | 1.00  | 0.56       |        |
| <input checked="" type="checkbox"/> | A3   | GAPDH 102   | Unknown     | 4       | 0.98  | 0.42       |        |
| <input checked="" type="checkbox"/> | A4   | GAPDH 107   | Unknown     | 1       | 0.93  | 0.47       |        |
| <input checked="" type="checkbox"/> | A5   | GAPDH 107   | Unknown     | 1       | 0.93  | 0.47       |        |
| <input checked="" type="checkbox"/> | A6   | GAPDH 107   | Unknown     | 1       | 0.93  | 0.47       |        |
| <input checked="" type="checkbox"/> | A7   | GAPDH 110   | Unknown     | 1       | 0.94  | 0.46       |        |
| <input checked="" type="checkbox"/> | A8   | GAPDH 110   | Unknown     | 1       | 0.95  | 0.45       |        |
| <input checked="" type="checkbox"/> | A9   | GAPDH 110   | Unknown     | 1       | 0.96  | 0.45       |        |
| <input checked="" type="checkbox"/> | A10  | GAPDH 113   | Unknown     | 1       | 0.95  | 0.44       |        |
| <input checked="" type="checkbox"/> | A11  | GAPDH 113   | Unknown     | 1       | 0.95  | 0.44       |        |
| <input checked="" type="checkbox"/> | A12  | GAPDH 113   | Unknown     | 1       | 0.95  | 0.44       |        |
| <input checked="" type="checkbox"/> | B1   | FCER1A 102  | Unknown     | 3       | 0.98  | 0.87       |        |
| <input checked="" type="checkbox"/> | B2   | FCER1A 102  | Unknown     | 3       | 0.99  | 0.89       |        |
| <input checked="" type="checkbox"/> | B3   | FCER1A 102  | Unknown     | 3       | 1.00  | 0.89       |        |
| <input checked="" type="checkbox"/> | B4   | FCER1A 107  | Unknown     | 2       | 0.99  | 0.41       |        |
| <input checked="" type="checkbox"/> | B5   | FCER1A 107  | Unknown     | 2       | 0.99  | 0.42       |        |
| <input checked="" type="checkbox"/> | B6   | FCER1A 107  | Unknown     | 2       | 0.82  | 0.15       |        |
| <input checked="" type="checkbox"/> | B7   | FCER1A 110  | Unknown     | 2       | 0.96  | 0.40       |        |
| <input checked="" type="checkbox"/> | B8   | FCER1A 110  | Unknown     | 2       | 0.95  | 0.32       |        |
| <input checked="" type="checkbox"/> | B9   | FCER1A 110  | Unknown     | 5       | 0.81  | 0.19       |        |
| <input checked="" type="checkbox"/> | B10  | FCER1A 113  | Unknown     | 5       | 1.00  | 0.55       |        |
| <input checked="" type="checkbox"/> | B11  | FCER1A 113  | Unknown     | 2       | 0.98  | 0.30       |        |
| <input checked="" type="checkbox"/> | B12  | FCER1A 113  | Unknown     | Unknown | 0.80  | 0.07       |        |
| <input checked="" type="checkbox"/> | C1   | RGS1 102    | Unknown     | 3       | 0.89  | 0.73       |        |
| <input checked="" type="checkbox"/> | C2   | RGS1 102    | Unknown     | 3       | 0.89  | 0.75       |        |
| <input checked="" type="checkbox"/> | C3   | RGS1 102    | Unknown     | 6       | 1.00  | 0.80       |        |
| <input checked="" type="checkbox"/> | C4   | RGS1 107    | Unknown     | 1       | 0.99  | 0.55       |        |
| <input checked="" type="checkbox"/> | C5   | RGS1 107    | Unknown     | 1       | 0.99  | 0.59       |        |
| <input checked="" type="checkbox"/> | C6   | RGS1 107    | Unknown     | 1       | 0.99  | 0.61       |        |
| <input checked="" type="checkbox"/> | C7   | RGS1 110    | Unknown     | 1       | 0.96  | 0.55       |        |



## Results

| Inc                                 | Pos. | Sample Name | Sample Type | Group | Score | Resolution | Status |
|-------------------------------------|------|-------------|-------------|-------|-------|------------|--------|
| <input checked="" type="checkbox"/> | C8   | RGS1 110    | Unknown     | 1     | 0.99  | 0.60       |        |
| <input checked="" type="checkbox"/> | C9   | RGS1 110    | Unknown     | 1     | 0.98  | 0.62       |        |
| <input checked="" type="checkbox"/> | C10  | RGS1 113    | Unknown     | 1     | 0.98  | 0.52       |        |
| <input checked="" type="checkbox"/> | C11  | RGS1 113    | Unknown     | 1     | 0.99  | 0.41       |        |
| <input checked="" type="checkbox"/> | C12  | RGS1 113    | Unknown     | 1     | 0.98  | 0.60       |        |
| <input checked="" type="checkbox"/> | D1   | GAPDH 115   | Unknown     | 1     | 0.94  | 0.47       |        |
| <input checked="" type="checkbox"/> | D2   | GAPDH 115   | Unknown     | 1     | 0.93  | 0.48       |        |
| <input checked="" type="checkbox"/> | D3   | GAPDH 115   | Unknown     | 1     | 0.93  | 0.48       |        |
| <input checked="" type="checkbox"/> | D4   | GAPDH 117   | Unknown     | 1     | 0.91  | 0.49       |        |
| <input checked="" type="checkbox"/> | D5   | GAPDH 117   | Unknown     | 1     | 0.93  | 0.46       |        |
| <input checked="" type="checkbox"/> | D6   | GAPDH 117   | Unknown     | 1     | 0.92  | 0.47       |        |
| <input checked="" type="checkbox"/> | D7   | GAPDH 119   | Unknown     | 1     | 0.91  | 0.49       |        |
| <input checked="" type="checkbox"/> | D8   | GAPDH 119   | Unknown     | 1     | 0.94  | 0.46       |        |
| <input checked="" type="checkbox"/> | D9   | GAPDH 119   | Unknown     | 1     | 0.93  | 0.47       |        |
| <input checked="" type="checkbox"/> | D10  | GAPDH 120   | Unknown     | 1     | 0.94  | 0.46       |        |
| <input checked="" type="checkbox"/> | D11  | GAPDH 120   | Unknown     | 1     | 0.92  | 0.47       |        |
| <input checked="" type="checkbox"/> | D12  | GAPDH 120   | Unknown     | 1     | 0.93  | 0.48       |        |
| <input checked="" type="checkbox"/> | E1   | FCER1A 115  | Unknown     | 2     | 0.99  | 0.48       |        |
| <input checked="" type="checkbox"/> | E2   | FCER1A 115  | Unknown     | 2     | 0.97  | 0.42       |        |
| <input checked="" type="checkbox"/> | E3   | FCER1A 115  | Unknown     | 2     | 0.97  | 0.46       |        |
| <input checked="" type="checkbox"/> | E4   | FCER1A 117  | Unknown     | 2     | 0.99  | 0.47       |        |
| <input checked="" type="checkbox"/> | E5   | FCER1A 117  | Unknown     | 2     | 0.99  | 0.53       |        |
| <input checked="" type="checkbox"/> | E6   | FCER1A 117  | Unknown     | 2     | 1.00  | 0.55       |        |
| <input checked="" type="checkbox"/> | E7   | FCER1A 119  | Unknown     | 2     | 0.99  | 0.52       |        |
| <input checked="" type="checkbox"/> | E8   | FCER1A 119  | Unknown     | 2     | 0.99  | 0.52       |        |
| <input checked="" type="checkbox"/> | E9   | FCER1A 119  | Unknown     | 2     | 0.99  | 0.57       |        |
| <input checked="" type="checkbox"/> | E10  | FCER1A 120  | Unknown     | 2     | 0.99  | 0.58       |        |
| <input checked="" type="checkbox"/> | E11  | FCER1A 120  | Unknown     | 2     | 0.99  | 0.53       |        |
| <input checked="" type="checkbox"/> | E12  | FCER1A 120  | Unknown     | 2     | 0.99  | 0.53       |        |
| <input checked="" type="checkbox"/> | F1   | RGS1 115    | Unknown     | 1     | 0.99  | 0.62       |        |
| <input checked="" type="checkbox"/> | F2   | RGS1 115    | Unknown     | 1     | 0.99  | 0.52       |        |
| <input checked="" type="checkbox"/> | F3   | RGS1 115    | Unknown     | 1     | 0.99  | 0.65       |        |
| <input checked="" type="checkbox"/> | F4   | RGS1 117    | Unknown     | 1     | 0.99  | 0.58       |        |
| <input checked="" type="checkbox"/> | F5   | RGS1 117    | Unknown     | 1     | 0.99  | 0.65       |        |
| <input checked="" type="checkbox"/> | F6   | RGS1 117    | Unknown     | 1     | 0.99  | 0.62       |        |
| <input checked="" type="checkbox"/> | F7   | RGS1 119    | Unknown     | 1     | 0.99  | 0.70       |        |
| <input checked="" type="checkbox"/> | F8   | RGS1 119    | Unknown     | 1     | 0.99  | 0.66       |        |
| <input checked="" type="checkbox"/> | F9   | RGS1 119    | Unknown     | 1     | 1.00  | 0.66       |        |

**Results**

| Inc                                 | Pos. | Sample Name | Sample Type | Group    | Score | Resolution | Status |
|-------------------------------------|------|-------------|-------------|----------|-------|------------|--------|
| <input checked="" type="checkbox"/> | F10  | RGS1 120    | Unknown     | 1        | 0.99  | 0.61       |        |
| <input checked="" type="checkbox"/> | F11  | RGS1 120    | Unknown     | 1        | 0.99  | 0.64       |        |
| <input checked="" type="checkbox"/> | F12  | RGS1 120    | Unknown     | 1        | 0.99  | 0.63       |        |
| <input checked="" type="checkbox"/> | G1   |             | Unknown     | Negative | 1.00  | 1.00       |        |
| <input checked="" type="checkbox"/> | G2   |             | Unknown     | Negative | 1.00  | 1.00       |        |
| <input checked="" type="checkbox"/> | G3   |             | Unknown     | Negative | 1.00  | 1.00       |        |
| <input checked="" type="checkbox"/> | G4   |             | Unknown     | Negative | 1.00  | 1.00       |        |
| <input checked="" type="checkbox"/> | G5   |             | Unknown     | Negative | 1.00  | 1.00       |        |
| <input checked="" type="checkbox"/> | G6   |             | Unknown     | Negative | 1.00  | 1.00       |        |
| <input checked="" type="checkbox"/> | G7   |             | Unknown     | Negative | 1.00  | 1.00       |        |
| <input checked="" type="checkbox"/> | G8   |             | Unknown     | Negative | 1.00  | 1.00       |        |
| <input checked="" type="checkbox"/> | G9   |             | Unknown     | Negative | 1.00  | 1.00       |        |
| <input checked="" type="checkbox"/> | G10  |             | Unknown     | Negative | 1.00  | 1.00       |        |
| <input checked="" type="checkbox"/> | G11  |             | Unknown     | Negative | 1.00  | 1.00       |        |
| <input checked="" type="checkbox"/> | G12  |             | Unknown     | Negative | 1.00  | 1.00       |        |
| <input checked="" type="checkbox"/> | H1   |             | Unknown     | Negative | 1.00  | 1.00       |        |
| <input checked="" type="checkbox"/> | H2   |             | Unknown     | Negative | 1.00  | 1.00       |        |
| <input checked="" type="checkbox"/> | H3   |             | Unknown     | Negative | 1.00  | 1.00       |        |
| <input checked="" type="checkbox"/> | H4   |             | Unknown     | Negative | 1.00  | 1.00       |        |
| <input checked="" type="checkbox"/> | H5   |             | Unknown     | Negative | 1.00  | 1.00       |        |
| <input checked="" type="checkbox"/> | H6   |             | Unknown     | Negative | 1.00  | 1.00       |        |
| <input checked="" type="checkbox"/> | H7   |             | Unknown     | Negative | 1.00  | 1.00       |        |
| <input checked="" type="checkbox"/> | H8   |             | Unknown     | Negative | 1.00  | 1.00       |        |
| <input checked="" type="checkbox"/> | H9   |             | Unknown     | Negative | 1.00  | 1.00       |        |
| <input checked="" type="checkbox"/> | H10  |             | Unknown     | Negative | 1.00  | 1.00       |        |
| <input checked="" type="checkbox"/> | H11  |             | Unknown     | Negative | 1.00  | 1.00       |        |
| <input checked="" type="checkbox"/> | H12  |             | Unknown     | Negative | 1.00  | 1.00       |        |

### Melting Curves

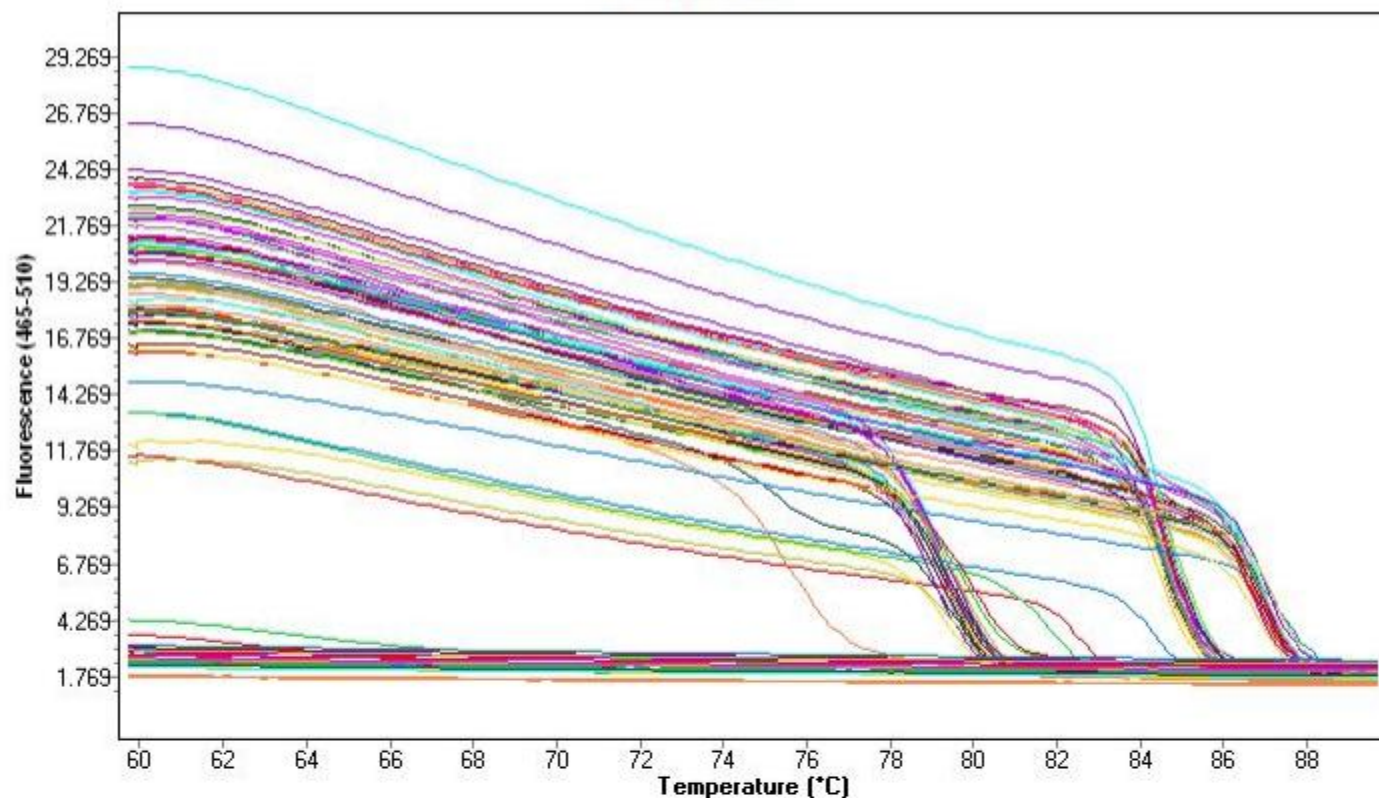

### Melting Peaks

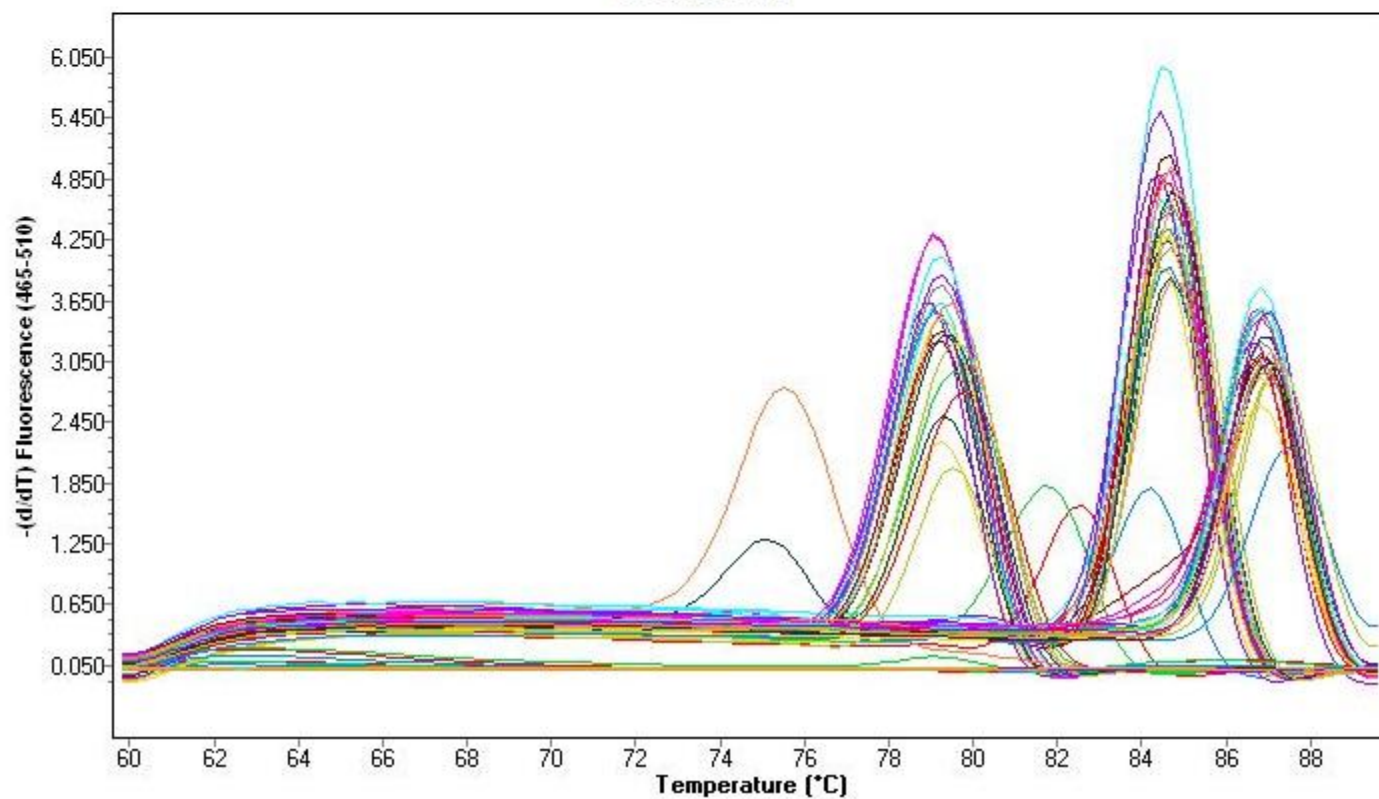

### Analysis Notes

## Tm Calling for All Samples (Tm Calling)

### Settings

|                |             |                    |          |
|----------------|-------------|--------------------|----------|
| Channel        | 465-510     | Color Compensation | Off      |
| Program        | Program     |                    |          |
| Show Shoulders | False       | Chemistry          | HybProbe |
|                |             | Max Peaks          | 2        |
| Subset Name    | All Samples |                    |          |

### Results

| Inc                                 | Pos | Sample Name | Peak 1 |       |       |        | Peak 2 |      |       |        | Status |
|-------------------------------------|-----|-------------|--------|-------|-------|--------|--------|------|-------|--------|--------|
|                                     |     |             | Tm     | Area  | Width | Height | Tm     | Area | Width | Height |        |
| <input checked="" type="checkbox"/> | A1  | GAPDH 102   | 84.31  | 4.40  | 2.52  | 1.75   |        |      |       |        |        |
| <input checked="" type="checkbox"/> | A2  | GAPDH 102   | 82.60  | 4.01  | 2.45  | 1.64   |        |      |       |        |        |
| <input checked="" type="checkbox"/> | A3  | GAPDH 102   | 81.80  | 5.11  | 2.71  | 1.89   |        |      |       |        |        |
| <input checked="" type="checkbox"/> | A4  | GAPDH 107   | 84.68  | 11.30 | 2.39  | 4.72   |        |      |       |        |        |
| <input checked="" type="checkbox"/> | A5  | GAPDH 107   | 84.76  | 9.61  | 2.22  | 4.33   |        |      |       |        |        |
| <input checked="" type="checkbox"/> | A6  | GAPDH 107   | 84.57  | 9.80  | 2.35  | 4.17   |        |      |       |        |        |
| <input checked="" type="checkbox"/> | A7  | GAPDH 110   | 84.67  | 10.47 | 2.38  | 4.40   |        |      |       |        |        |
| <input checked="" type="checkbox"/> | A8  | GAPDH 110   | 84.60  | 11.70 | 2.43  | 4.81   |        |      |       |        |        |
| <input checked="" type="checkbox"/> | A9  | GAPDH 110   | 84.75  | 9.62  | 2.39  | 4.03   |        |      |       |        |        |
| <input checked="" type="checkbox"/> | A10 | GAPDH 113   | 84.86  | 9.22  | 2.32  | 3.98   |        |      |       |        |        |
| <input checked="" type="checkbox"/> | A11 | GAPDH 113   | 84.47  | 10.94 | 2.14  | 5.11   |        |      |       |        |        |
| <input checked="" type="checkbox"/> | A12 | GAPDH 113   | 84.83  | 9.61  | 2.15  | 4.46   |        |      |       |        |        |
| <input checked="" type="checkbox"/> | B1  | FCER1A 102  | 71.97  | 0.17  | 8.89  | 0.02   |        |      |       |        |        |
| <input checked="" type="checkbox"/> | B2  | FCER1A 102  | 70.47  | 0.23  | 8.27  | 0.03   |        |      |       |        |        |
| <input checked="" type="checkbox"/> | B3  | FCER1A 102  | 69.22  | 0.26  | 6.65  | 0.04   |        |      |       |        |        |
| <input checked="" type="checkbox"/> | B4  | FCER1A 107  | 79.15  | 10.72 | 2.40  | 4.46   |        |      |       |        |        |
| <input checked="" type="checkbox"/> | B5  | FCER1A 107  | 79.14  | 8.97  | 2.43  | 3.70   |        |      |       |        |        |
| <input checked="" type="checkbox"/> | B6  | FCER1A 107  | 79.26  | 5.58  | 2.36  | 2.36   |        |      |       |        |        |
| <input checked="" type="checkbox"/> | B7  | FCER1A 110  | 79.25  | 7.75  | 2.32  | 3.34   |        |      |       |        |        |
| <input checked="" type="checkbox"/> | B8  | FCER1A 110  | 79.19  | 9.17  | 2.49  | 3.68   |        |      |       |        |        |
| <input checked="" type="checkbox"/> | B9  | FCER1A 110  | 75.05  | 2.21  | 2.25  | 0.98   | 79.40  | 6.02 | 2.35  | 2.56   |        |
| <input checked="" type="checkbox"/> | B10 | FCER1A 113  | 75.58  | 8.91  | 3.24  | 2.75   |        |      |       |        |        |
| <input checked="" type="checkbox"/> | B11 | FCER1A 113  | 78.92  | 9.65  | 2.56  | 3.77   |        |      |       |        |        |
| <input checked="" type="checkbox"/> | B12 | FCER1A 113  | 79.65  | 4.29  | 2.09  | 2.05   |        |      |       |        |        |
| <input checked="" type="checkbox"/> | C1  | RGS1 102    | 66.10  | 0.45  | 5.08  | 0.09   |        |      |       |        |        |
| <input checked="" type="checkbox"/> | C2  | RGS1 102    | 66.07  | 0.67  | 5.33  | 0.13   |        |      |       |        |        |
| <input checked="" type="checkbox"/> | C3  | RGS1 102    |        |       |       |        |        |      |       |        |        |
| <input checked="" type="checkbox"/> | C4  | RGS1 107    |        |       |       |        |        |      |       |        |        |
| <input checked="" type="checkbox"/> | C5  | RGS1 107    |        |       |       |        |        |      |       |        |        |

## Results

| Inc                                 | Pos | Sample Name | Peak 1 |       |       |        | Peak 2 |      |       |        | Status |
|-------------------------------------|-----|-------------|--------|-------|-------|--------|--------|------|-------|--------|--------|
|                                     |     |             | Tm     | Area  | Width | Height | Tm     | Area | Width | Height |        |
| <input checked="" type="checkbox"/> | C6  | RGS1 107    |        |       |       |        |        |      |       |        |        |
| <input checked="" type="checkbox"/> | C7  | RGS1 110    |        |       |       |        |        |      |       |        |        |
| <input checked="" type="checkbox"/> | C8  | RGS1 110    |        |       |       |        |        |      |       |        |        |
| <input checked="" type="checkbox"/> | C9  | RGS1 110    |        |       |       |        |        |      |       |        |        |
| <input checked="" type="checkbox"/> | C10 | RGS1 113    |        |       |       |        |        |      |       |        |        |
| <input checked="" type="checkbox"/> | C11 | RGS1 113    |        |       |       |        |        |      |       |        |        |
| <input checked="" type="checkbox"/> | C12 | RGS1 113    |        |       |       |        |        |      |       |        |        |
| <input checked="" type="checkbox"/> | D1  | GAPDH 115   | 84.73  | 9.47  | 2.32  | 4.08   |        |      |       |        |        |
| <input checked="" type="checkbox"/> | D2  | GAPDH 115   | 84.66  | 11.41 | 2.26  | 5.04   |        |      |       |        |        |
| <input checked="" type="checkbox"/> | D3  | GAPDH 115   | 84.78  | 10.95 | 2.29  | 4.78   |        |      |       |        |        |
| <input checked="" type="checkbox"/> | D4  | GAPDH 117   | 84.68  | 12.38 | 2.43  | 5.10   |        |      |       |        |        |
| <input checked="" type="checkbox"/> | D5  | GAPDH 117   | 84.67  | 10.94 | 2.41  | 4.53   |        |      |       |        |        |
| <input checked="" type="checkbox"/> | D6  | GAPDH 117   | 84.61  | 10.70 | 2.42  | 4.43   |        |      |       |        |        |
| <input checked="" type="checkbox"/> | D7  | GAPDH 119   | 84.71  | 11.97 | 2.24  | 5.36   |        |      |       |        |        |
| <input checked="" type="checkbox"/> | D8  | GAPDH 119   | 84.67  | 14.30 | 2.32  | 6.17   |        |      |       |        |        |
| <input checked="" type="checkbox"/> | D9  | GAPDH 119   | 84.87  | 11.37 | 2.32  | 4.91   |        |      |       |        |        |
| <input checked="" type="checkbox"/> | D10 | GAPDH 120   | 84.84  | 12.00 | 2.33  | 5.15   |        |      |       |        |        |
| <input checked="" type="checkbox"/> | D11 | GAPDH 120   | 84.55  | 13.28 | 2.36  | 5.64   |        |      |       |        |        |
| <input checked="" type="checkbox"/> | D12 | GAPDH 120   | 85.00  | 11.37 | 2.32  | 4.90   |        |      |       |        |        |
| <input checked="" type="checkbox"/> | E1  | FCER1A 115  | 79.16  | 9.24  | 2.54  | 3.63   |        |      |       |        |        |
| <input checked="" type="checkbox"/> | E2  | FCER1A 115  | 79.90  | 7.56  | 2.67  | 2.83   |        |      |       |        |        |
| <input checked="" type="checkbox"/> | E3  | FCER1A 115  | 79.69  | 8.30  | 2.72  | 3.05   |        |      |       |        |        |
| <input checked="" type="checkbox"/> | E4  | FCER1A 117  | 79.15  | 11.31 | 2.55  | 4.44   |        |      |       |        |        |
| <input checked="" type="checkbox"/> | E5  | FCER1A 117  | 79.29  | 10.31 | 2.62  | 3.94   |        |      |       |        |        |
| <input checked="" type="checkbox"/> | E6  | FCER1A 117  | 79.34  | 9.34  | 2.58  | 3.62   |        |      |       |        |        |
| <input checked="" type="checkbox"/> | E7  | FCER1A 119  | 79.32  | 9.00  | 2.59  | 3.47   |        |      |       |        |        |
| <input checked="" type="checkbox"/> | E8  | FCER1A 119  | 79.27  | 11.01 | 2.61  | 4.21   |        |      |       |        |        |
| <input checked="" type="checkbox"/> | E9  | FCER1A 119  | 79.47  | 9.15  | 2.66  | 3.44   |        |      |       |        |        |
| <input checked="" type="checkbox"/> | E10 | FCER1A 120  | 79.53  | 9.99  | 2.66  | 3.76   |        |      |       |        |        |
| <input checked="" type="checkbox"/> | E11 | FCER1A 120  | 79.31  | 10.71 | 2.63  | 4.07   |        |      |       |        |        |
| <input checked="" type="checkbox"/> | E12 | FCER1A 120  | 79.69  | 8.97  | 2.66  | 3.37   |        |      |       |        |        |
| <input checked="" type="checkbox"/> | F1  | RGS1 115    |        |       |       |        |        |      |       |        |        |
| <input checked="" type="checkbox"/> | F2  | RGS1 115    |        |       |       |        |        |      |       |        |        |
| <input checked="" type="checkbox"/> | F3  | RGS1 115    |        |       |       |        |        |      |       |        |        |
| <input checked="" type="checkbox"/> | F4  | RGS1 117    |        |       |       |        |        |      |       |        |        |
| <input checked="" type="checkbox"/> | F5  | RGS1 117    |        |       |       |        |        |      |       |        |        |

## Results

| Inc                                 | Pos | Sample Name | Peak 1 |      |       |        | Peak 2 |      |       |        | Status |
|-------------------------------------|-----|-------------|--------|------|-------|--------|--------|------|-------|--------|--------|
|                                     |     |             | Tm     | Area | Width | Height | Tm     | Area | Width | Height |        |
| <input checked="" type="checkbox"/> | F6  | RGS1 117    |        |      |       |        |        |      |       |        |        |
| <input checked="" type="checkbox"/> | F7  | RGS1 119    |        |      |       |        |        |      |       |        |        |
| <input checked="" type="checkbox"/> | F8  | RGS1 119    |        |      |       |        |        |      |       |        |        |
| <input checked="" type="checkbox"/> | F9  | RGS1 119    |        |      |       |        |        |      |       |        |        |
| <input checked="" type="checkbox"/> | F10 | RGS1 120    |        |      |       |        |        |      |       |        |        |
| <input checked="" type="checkbox"/> | F11 | RGS1 120    |        |      |       |        |        |      |       |        |        |
| <input checked="" type="checkbox"/> | F12 | RGS1 120    |        |      |       |        |        |      |       |        |        |
| <input checked="" type="checkbox"/> | G1  |             |        |      |       |        |        |      |       |        |        |
| <input checked="" type="checkbox"/> | G2  |             |        |      |       |        |        |      |       |        |        |
| <input checked="" type="checkbox"/> | G3  |             |        |      |       |        |        |      |       |        |        |
| <input checked="" type="checkbox"/> | G4  |             |        |      |       |        |        |      |       |        |        |
| <input checked="" type="checkbox"/> | G5  |             |        |      |       |        |        |      |       |        |        |
| <input checked="" type="checkbox"/> | G6  |             |        |      |       |        |        |      |       |        |        |
| <input checked="" type="checkbox"/> | G7  |             |        |      |       |        |        |      |       |        |        |
| <input checked="" type="checkbox"/> | G8  |             |        |      |       |        |        |      |       |        |        |
| <input checked="" type="checkbox"/> | G9  |             |        |      |       |        |        |      |       |        |        |
| <input checked="" type="checkbox"/> | G10 |             |        |      |       |        |        |      |       |        |        |
| <input checked="" type="checkbox"/> | G11 |             |        |      |       |        |        |      |       |        |        |
| <input checked="" type="checkbox"/> | G12 |             |        |      |       |        |        |      |       |        |        |
| <input checked="" type="checkbox"/> | H1  |             |        |      |       |        |        |      |       |        |        |
| <input checked="" type="checkbox"/> | H2  |             |        |      |       |        |        |      |       |        |        |
| <input checked="" type="checkbox"/> | H3  |             |        |      |       |        |        |      |       |        |        |
| <input checked="" type="checkbox"/> | H4  |             |        |      |       |        |        |      |       |        |        |
| <input checked="" type="checkbox"/> | H5  |             |        |      |       |        |        |      |       |        |        |
| <input checked="" type="checkbox"/> | H6  |             |        |      |       |        |        |      |       |        |        |
| <input checked="" type="checkbox"/> | H7  |             |        |      |       |        |        |      |       |        |        |
| <input checked="" type="checkbox"/> | H8  |             |        |      |       |        |        |      |       |        |        |
| <input checked="" type="checkbox"/> | H9  |             |        |      |       |        |        |      |       |        |        |
| <input checked="" type="checkbox"/> | H10 |             |        |      |       |        |        |      |       |        |        |
| <input checked="" type="checkbox"/> | H11 |             |        |      |       |        |        |      |       |        |        |
| <input checked="" type="checkbox"/> | H12 |             |        |      |       |        |        |      |       |        |        |

### Melting Curves

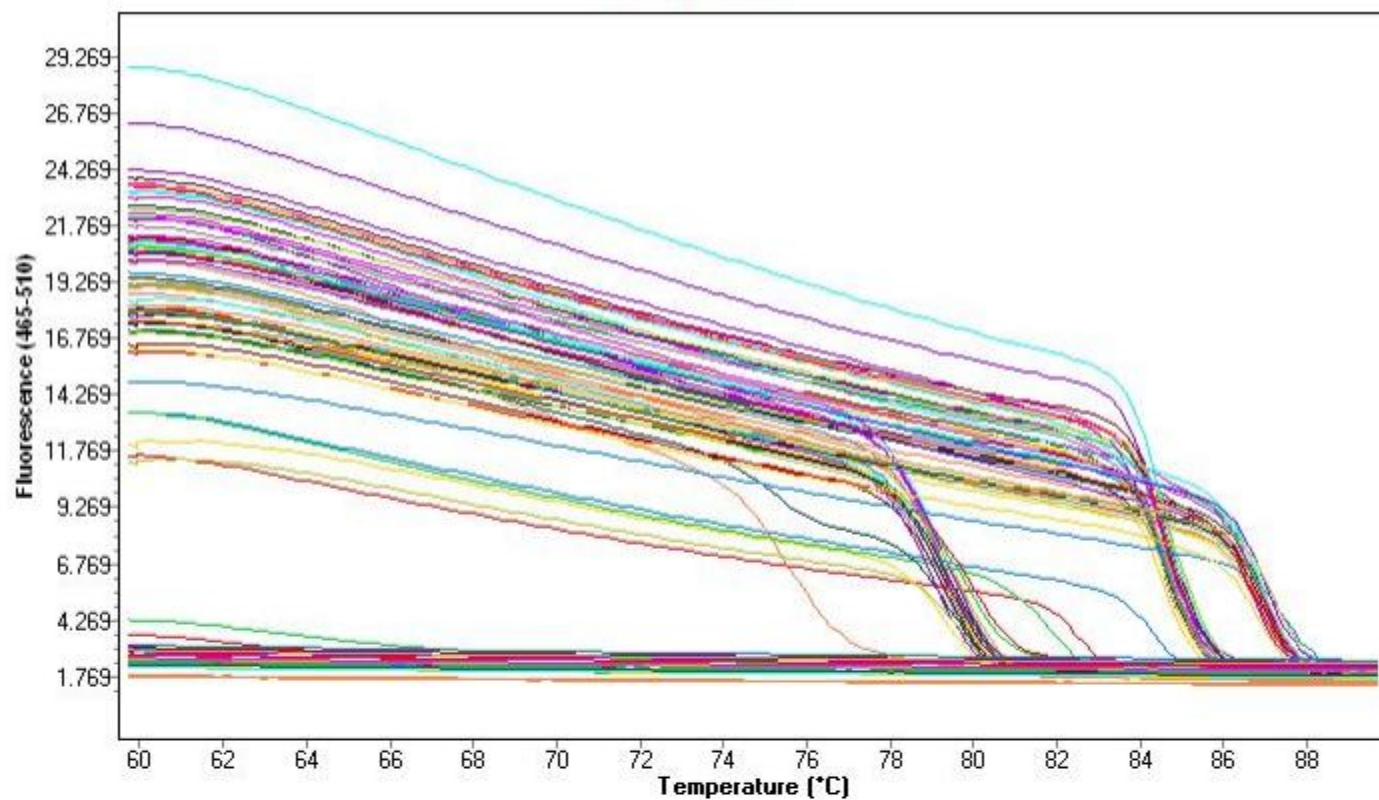

### Melting Peaks



### Analysis Notes
