# Supplementary material for: Exploring differential gene expression and biomarker potential in systemic lupus erythematosus: a retrospective study
Source: PeerJ journal article supplement (doi:10.7717/peerj.19891), 2025-09-08
Supplement: qPCR.zip [file qPCR.zip]

# cobas® 4800 User Defined Workflow (UDF)

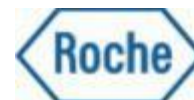

## 20241222xj plate1

### Experiment

|               |                       |                    |                                    |
|---------------|-----------------------|--------------------|------------------------------------|
| Creation Date | 12/22/2024 4:13:15 PM | Last Modified Date | 12/22/2024 5:24:59 PM              |
| Operator      | System Admin          | Owner              | System Admin                       |
| Start Time    | 12/22/2024 4:21:50 PM | End Time           | 12/22/2024 5:20:24 PM              |
| Run State     | Completed             | Software Version   | LCS480 1.5.1.62 SP3 - UDF 2.1.0.26 |
| Macro         |                       | Macro Owner        |                                    |
| Macro Status  |                       |                    |                                    |
| Templates     | gongying              | Plate ID           |                                    |
| Test ID       |                       | Lot ID             |                                    |
| Color Comp ID |                       |                    |                                    |
| Run Notes     |                       |                    |                                    |

### Programs

|              |         |               |      |
|--------------|---------|---------------|------|
| Program Name | Program |               |      |
| Cycles       | 1       | Analysis Mode | None |

| Target (°C) | Acquisition Mode | Hold (hh:mm:ss) | Ramp Rate (°C/s) | Acquisitions (per °C) | Sec Target (°C) | Step size (°C) | Step Delay (cycles) |
|-------------|------------------|-----------------|------------------|-----------------------|-----------------|----------------|---------------------|
| 95          | None             | 00:00:30        | 4.40             |                       | 0               | 0              | 0                   |

|              |         |               |                |
|--------------|---------|---------------|----------------|
| Program Name | Program |               |                |
| Cycles       | 40      | Analysis Mode | Quantification |

| Target (°C) | Acquisition Mode | Hold (hh:mm:ss) | Ramp Rate (°C/s) | Acquisitions (per °C) | Sec Target (°C) | Step size (°C) | Step Delay (cycles) |
|-------------|------------------|-----------------|------------------|-----------------------|-----------------|----------------|---------------------|
| 95          | None             | 00:00:15        | 4.40             |                       | 0               | 0              | 0                   |
| 60          | Single           | 00:00:30        | 2.20             |                       | 0               | 0              | 0                   |

|              |         |               |                |
|--------------|---------|---------------|----------------|
| Program Name | Program |               |                |
| Cycles       | 1       | Analysis Mode | Melting Curves |

| Target (°C) | Acquisition Mode | Hold (hh:mm:ss) | Ramp Rate (°C/s) | Acquisitions (per °C) | Sec Target (°C) | Step size (°C) | Step Delay (cycles) |
|-------------|------------------|-----------------|------------------|-----------------------|-----------------|----------------|---------------------|
| 95          | None             | 00:01:00        | 4.40             |                       | 0               | 0              | 0                   |
| 60          | None             | 00:00:30        | 2.20             |                       | 0               | 0              | 0                   |
| 90          | Continuous       |                 | 0.11             | 5                     | 0               | 0              | 0                   |

|              |         |               |      |
|--------------|---------|---------------|------|
| Program Name | Program |               |      |
| Cycles       | 1       | Analysis Mode | None |

| Target (°C) | Acquisition Mode | Hold (hh:mm:ss) | Ramp Rate (°C/s) | Acquisitions (per °C) | Sec Target (°C) | Step size (°C) | Step Delay (cycles) |
|-------------|------------------|-----------------|------------------|-----------------------|-----------------|----------------|---------------------|
|-------------|------------------|-----------------|------------------|-----------------------|-----------------|----------------|---------------------|

| Target (°C) | Acquisition Mode | Hold (hh:mm:ss) | Ramp Rate (°C/s) | Acquisitions (per °C) | Sec Target (°C) | Step size (°C) | Step Delay (cycles) |
|-------------|------------------|-----------------|------------------|-----------------------|-----------------|----------------|---------------------|
| 40          | None             | 00:00:30        | 2.20             |                       | 0               | 0              | 0                   |

## Samples

| Sample Count |          | 96          |          |              |  |  |  |
|--------------|----------|-------------|----------|--------------|--|--|--|
| Subset       |          | All Samples |          |              |  |  |  |
| Pos          | Name     | ID          | Repl. Of | Sample Notes |  |  |  |
| A1           | GAPDH 1  |             |          |              |  |  |  |
| A2           | GAPDH 1  |             |          |              |  |  |  |
| A3           | GAPDH 1  |             |          |              |  |  |  |
| A4           | GAPDH 2  |             |          |              |  |  |  |
| A5           | GAPDH 2  |             |          |              |  |  |  |
| A6           | GAPDH 2  |             |          |              |  |  |  |
| A7           | GAPDH 3  |             |          |              |  |  |  |
| A8           | GAPDH 3  |             |          |              |  |  |  |
| A9           | GAPDH 3  |             |          |              |  |  |  |
| A10          | GAPDH 4  |             |          |              |  |  |  |
| A11          | GAPDH 4  |             |          |              |  |  |  |
| A12          | GAPDH 4  |             |          |              |  |  |  |
| B1           | FCER1A 1 |             |          |              |  |  |  |
| B2           | FCER1A 1 |             |          |              |  |  |  |
| B3           | FCER1A 1 |             |          |              |  |  |  |
| B4           | FCER1A 2 |             |          |              |  |  |  |
| B5           | FCER1A 2 |             |          |              |  |  |  |
| B6           | FCER1A 2 |             |          |              |  |  |  |
| B7           | FCER1A 3 |             |          |              |  |  |  |
| B8           | FCER1A 3 |             |          |              |  |  |  |
| B9           | FCER1A 3 |             |          |              |  |  |  |
| B10          | FCER1A 4 |             |          |              |  |  |  |
| B11          | FCER1A 4 |             |          |              |  |  |  |
| B12          | FCER1A 4 |             |          |              |  |  |  |
| C1           | GAPDH 5  |             |          |              |  |  |  |
| C2           | GAPDH 5  |             |          |              |  |  |  |
| C3           | GAPDH 5  |             |          |              |  |  |  |
| C4           | GAPDH 7  |             |          |              |  |  |  |
| C5           | GAPDH 7  |             |          |              |  |  |  |
| C6           | GAPDH 7  |             |          |              |  |  |  |
| C7           | GAPDH 11 |             |          |              |  |  |  |
| C8           | GAPDH 11 |             |          |              |  |  |  |
| C9           | GAPDH 11 |             |          |              |  |  |  |
| C10          | GAPDH 14 |             |          |              |  |  |  |
| C11          | GAPDH 14 |             |          |              |  |  |  |
| C12          | GAPDH 14 |             |          |              |  |  |  |

## Samples

| Sample Count |           | 96          |          |              |
|--------------|-----------|-------------|----------|--------------|
| Subset       |           | All Samples |          |              |
| Pos          | Name      | ID          | Repl. Of | Sample Notes |
| D1           | FCER1A 5  |             |          |              |
| D2           | FCER1A 5  |             |          |              |
| D3           | FCER1A 5  |             |          |              |
| D4           | FCER1A 7  |             |          |              |
| D5           | FCER1A 7  |             |          |              |
| D6           | FCER1A 7  |             |          |              |
| D7           | FCER1A 11 |             |          |              |
| D8           | FCER1A 11 |             |          |              |
| D9           | FCER1A 11 |             |          |              |
| D10          | FCER1A 14 |             |          |              |
| D11          | FCER1A 14 |             |          |              |
| D12          | FCER1A 14 |             |          |              |
| E1           | GAPDH 15  |             |          |              |
| E2           | GAPDH 15  |             |          |              |
| E3           | GAPDH 15  |             |          |              |
| E4           | GAPDH 18  |             |          |              |
| E5           | GAPDH 18  |             |          |              |
| E6           | GAPDH 18  |             |          |              |
| E7           | GAPDH 19  |             |          |              |
| E8           | GAPDH 19  |             |          |              |
| E9           | GAPDH 19  |             |          |              |
| E10          | GAPDH 20  |             |          |              |
| E11          | GAPDH 20  |             |          |              |
| E12          | GAPDH 20  |             |          |              |
| F1           | FCER1A 15 |             |          |              |
| F2           | FCER1A 15 |             |          |              |
| F3           | FCER1A 15 |             |          |              |
| F4           | FCER1A 18 |             |          |              |
| F5           | FCER1A 18 |             |          |              |
| F6           | FCER1A 18 |             |          |              |
| F7           | FCER1A 19 |             |          |              |
| F8           | FCER1A 19 |             |          |              |
| F9           | FCER1A 19 |             |          |              |
| F10          | FCER1A 20 |             |          |              |
| F11          | FCER1A 20 |             |          |              |
| F12          | FCER1A 20 |             |          |              |
| G1           | GAPDH 24  |             |          |              |
| G2           | GAPDH 24  |             |          |              |
| G3           | GAPDH 24  |             |          |              |

Samples

|              |             |    |          |              |
|--------------|-------------|----|----------|--------------|
| Sample Count | 96          |    |          |              |
| Subset       | All Samples |    |          |              |
| Pos          | Name        | ID | Repl. Of | Sample Notes |
| G4           | GAPDH 26    |    |          |              |
| G5           | GAPDH 26    |    |          |              |
| G6           | GAPDH 26    |    |          |              |
| G7           |             |    |          |              |
| G8           |             |    |          |              |
| G9           |             |    |          |              |
| G10          |             |    |          |              |
| G11          |             |    |          |              |
| G12          |             |    |          |              |
| H1           | FCER1A 24   |    |          |              |
| H2           | FCER1A 24   |    |          |              |
| H3           | FCER1A 24   |    |          |              |
| H4           | FCER1A 26   |    |          |              |
| H5           | FCER1A 26   |    |          |              |
| H6           | FCER1A 26   |    |          |              |
| H7           |             |    |          |              |
| H8           |             |    |          |              |
| H9           |             |    |          |              |
| H10          |             |    |          |              |
| H11          |             |    |          |              |
| H12          |             |    |          |              |

Instrument

|      |      |               |       |
|------|------|---------------|-------|
| Name | Z480 | Serial Number | 56319 |
|------|------|---------------|-------|

Revision History

|          |      |      |        |
|----------|------|------|--------|
| Revision | Date | User | Reason |
|          |      |      |        |

Abs Quant/2nd Derivative Max for All Samples (Abs Quant/2nd Derivative Max)

Settings

|                    |                 |       |  |
|--------------------|-----------------|-------|--|
| Channel            | 465-510         |       |  |
| Color Compensation | Off             |       |  |
| Program            | Program         | Units |  |
| Mode               | High Confidence |       |  |

|             |             |
|-------------|-------------|
| Subset Name | All Samples |
|-------------|-------------|

Results

|         |    |     |         |                                     |      |    |               |          |        |
|---------|----|-----|---------|-------------------------------------|------|----|---------------|----------|--------|
| > -1.0e | CP | pos | N(lasmt | 5ive cycles) has higher uncertainty | Type | CP | Concentration | Standard | Status |
|---------|----|-----|---------|-------------------------------------|------|----|---------------|----------|--------|

## Results

| Inc                                 | Pos | Name     | Type    | CP    | Concentration | Standard | Status |
|-------------------------------------|-----|----------|---------|-------|---------------|----------|--------|
| <input checked="" type="checkbox"/> | A1  | GAPDH 1  | Unknown | 26.99 |               |          |        |
| <input checked="" type="checkbox"/> | A2  | GAPDH 1  | Unknown | 27.00 |               |          |        |
| <input checked="" type="checkbox"/> | A3  | GAPDH 1  | Unknown | 26.92 |               |          |        |
| <input checked="" type="checkbox"/> | A4  | GAPDH 2  | Unknown | 30.88 |               |          |        |
| <input checked="" type="checkbox"/> | A5  | GAPDH 2  | Unknown | 28.54 |               |          |        |
| <input checked="" type="checkbox"/> | A6  | GAPDH 2  | Unknown | 31.58 |               |          |        |
| <input checked="" type="checkbox"/> | A7  | GAPDH 3  | Unknown | 21.53 |               |          |        |
| <input checked="" type="checkbox"/> | A8  | GAPDH 3  | Unknown | 21.33 |               |          |        |
| <input checked="" type="checkbox"/> | A9  | GAPDH 3  | Unknown | 21.59 |               |          |        |
| <input checked="" type="checkbox"/> | A10 | GAPDH 4  | Unknown | 31.85 |               |          |        |
| <input checked="" type="checkbox"/> | A11 | GAPDH 4  | Unknown | 32.06 |               |          |        |
| <input checked="" type="checkbox"/> | A12 | GAPDH 4  | Unknown | 24.61 |               |          |        |
| <input checked="" type="checkbox"/> | B1  | FCER1A 1 | Unknown | 33.73 |               |          |        |
| <input checked="" type="checkbox"/> | B2  | FCER1A 1 | Unknown |       |               |          |        |
| <input checked="" type="checkbox"/> | B3  | FCER1A 1 | Unknown |       |               |          |        |
| <input checked="" type="checkbox"/> | B4  | FCER1A 2 | Unknown |       |               |          |        |
| <input checked="" type="checkbox"/> | B5  | FCER1A 2 | Unknown | 31.89 |               |          |        |
| <input checked="" type="checkbox"/> | B6  | FCER1A 2 | Unknown | 33.00 |               |          |        |
| <input checked="" type="checkbox"/> | B7  | FCER1A 3 | Unknown | 28.30 |               |          |        |
| <input checked="" type="checkbox"/> | B8  | FCER1A 3 | Unknown | 28.24 |               |          |        |
| <input checked="" type="checkbox"/> | B9  | FCER1A 3 | Unknown | 28.11 |               |          |        |
| <input checked="" type="checkbox"/> | B10 | FCER1A 4 | Unknown | 32.36 |               |          |        |
| <input checked="" type="checkbox"/> | B11 | FCER1A 4 | Unknown | 31.51 |               |          |        |
| <input checked="" type="checkbox"/> | B12 | FCER1A 4 | Unknown | 31.62 |               |          |        |
| <input checked="" type="checkbox"/> | C1  | GAPDH 5  | Unknown | 26.27 |               |          |        |
| <input checked="" type="checkbox"/> | C2  | GAPDH 5  | Unknown | 25.29 |               |          |        |
| <input checked="" type="checkbox"/> | C3  | GAPDH 5  | Unknown | 26.26 |               |          |        |
| <input checked="" type="checkbox"/> | C4  | GAPDH 7  | Unknown | 23.09 |               |          |        |
| <input checked="" type="checkbox"/> | C5  | GAPDH 7  | Unknown | 23.88 |               |          |        |
| <input checked="" type="checkbox"/> | C6  | GAPDH 7  | Unknown | 23.99 |               |          |        |
| <input checked="" type="checkbox"/> | C7  | GAPDH 11 | Unknown | 31.24 |               |          |        |
| <input checked="" type="checkbox"/> | C8  | GAPDH 11 | Unknown | 31.46 |               |          |        |
| <input checked="" type="checkbox"/> | C9  | GAPDH 11 | Unknown | 31.24 |               |          |        |
| <input checked="" type="checkbox"/> | C10 | GAPDH 14 | Unknown | 23.89 |               |          |        |
| <input checked="" type="checkbox"/> | C11 | GAPDH 14 | Unknown | 23.51 |               |          |        |
| <input checked="" type="checkbox"/> | C12 | GAPDH 14 | Unknown | 24.00 |               |          |        |
| <input checked="" type="checkbox"/> | D1  | FCER1A 5 | Unknown | 32.99 |               |          |        |

> - Late Cp call (last five cycles) has higher uncertainty

## Results

| Inc                                 | Pos | Name      | Type    | CP    | Concentration | Standard | Status |
|-------------------------------------|-----|-----------|---------|-------|---------------|----------|--------|
| <input checked="" type="checkbox"/> | D2  | FCER1A 5  | Unknown | 31.88 |               |          |        |
| <input checked="" type="checkbox"/> | D3  | FCER1A 5  | Unknown | 32.41 |               |          |        |
| <input checked="" type="checkbox"/> | D4  | FCER1A 7  | Unknown | 31.12 |               |          |        |
| <input checked="" type="checkbox"/> | D5  | FCER1A 7  | Unknown | 31.92 |               |          |        |
| <input checked="" type="checkbox"/> | D6  | FCER1A 7  | Unknown | 31.28 |               |          |        |
| <input checked="" type="checkbox"/> | D7  | FCER1A 11 | Unknown | 31.55 |               |          |        |
| <input checked="" type="checkbox"/> | D8  | FCER1A 11 | Unknown | 35.00 |               |          | >      |
| <input checked="" type="checkbox"/> | D9  | FCER1A 11 | Unknown | 33.80 |               |          |        |
| <input checked="" type="checkbox"/> | D10 | FCER1A 14 | Unknown | 32.30 |               |          |        |
| <input checked="" type="checkbox"/> | D11 | FCER1A 14 | Unknown | 31.67 |               |          |        |
| <input checked="" type="checkbox"/> | D12 | FCER1A 14 | Unknown | 31.21 |               |          |        |
| <input checked="" type="checkbox"/> | E1  | GAPDH 15  | Unknown | 22.94 |               |          |        |
| <input checked="" type="checkbox"/> | E2  | GAPDH 15  | Unknown | 22.68 |               |          |        |
| <input checked="" type="checkbox"/> | E3  | GAPDH 15  | Unknown | 22.51 |               |          |        |
| <input checked="" type="checkbox"/> | E4  | GAPDH 18  | Unknown | 23.62 |               |          |        |
| <input checked="" type="checkbox"/> | E5  | GAPDH 18  | Unknown | 23.66 |               |          |        |
| <input checked="" type="checkbox"/> | E6  | GAPDH 18  | Unknown | 23.62 |               |          |        |
| <input checked="" type="checkbox"/> | E7  | GAPDH 19  | Unknown | 22.90 |               |          |        |
| <input checked="" type="checkbox"/> | E8  | GAPDH 19  | Unknown | 23.00 |               |          |        |
| <input checked="" type="checkbox"/> | E9  | GAPDH 19  | Unknown | 24.31 |               |          |        |
| <input checked="" type="checkbox"/> | E10 | GAPDH 20  | Unknown | 22.95 |               |          |        |
| <input checked="" type="checkbox"/> | E11 | GAPDH 20  | Unknown | 22.85 |               |          |        |
| <input checked="" type="checkbox"/> | E12 | GAPDH 20  | Unknown | 22.86 |               |          |        |
| <input checked="" type="checkbox"/> | F1  | FCER1A 15 | Unknown | 32.29 |               |          |        |
| <input checked="" type="checkbox"/> | F2  | FCER1A 15 | Unknown | 31.06 |               |          |        |
| <input checked="" type="checkbox"/> | F3  | FCER1A 15 | Unknown | 31.63 |               |          |        |
| <input checked="" type="checkbox"/> | F4  | FCER1A 18 | Unknown | 29.90 |               |          |        |
| <input checked="" type="checkbox"/> | F5  | FCER1A 18 | Unknown | 30.62 |               |          |        |
| <input checked="" type="checkbox"/> | F6  | FCER1A 18 | Unknown | 31.15 |               |          |        |
| <input checked="" type="checkbox"/> | F7  | FCER1A 19 | Unknown | 29.75 |               |          |        |
| <input checked="" type="checkbox"/> | F8  | FCER1A 19 | Unknown | 29.98 |               |          |        |
| <input checked="" type="checkbox"/> | F9  | FCER1A 19 | Unknown | 30.63 |               |          |        |
| <input checked="" type="checkbox"/> | F10 | FCER1A 20 | Unknown | 30.12 |               |          |        |
| <input checked="" type="checkbox"/> | F11 | FCER1A 20 | Unknown | 31.40 |               |          |        |
| <input checked="" type="checkbox"/> | F12 | FCER1A 20 | Unknown | 30.90 |               |          |        |
| <input checked="" type="checkbox"/> | G1  | GAPDH 24  | Unknown | 21.98 |               |          |        |
| <input checked="" type="checkbox"/> | G2  | GAPDH 24  | Unknown | 21.79 |               |          |        |

> - Late Cp call (last five cycles) has higher uncertainty

## Results

| Inc                                 | Pos | Name      | Type    | CP    | Concentration | Standard | Status |
|-------------------------------------|-----|-----------|---------|-------|---------------|----------|--------|
| <input checked="" type="checkbox"/> | G3  | GAPDH 24  | Unknown | 21.94 |               |          |        |
| <input checked="" type="checkbox"/> | G4  | GAPDH 26  | Unknown | 23.57 |               |          |        |
| <input checked="" type="checkbox"/> | G5  | GAPDH 26  | Unknown | 23.78 |               |          |        |
| <input checked="" type="checkbox"/> | G6  | GAPDH 26  | Unknown | 23.78 |               |          |        |
| <input checked="" type="checkbox"/> | G7  |           | Unknown |       |               |          |        |
| <input checked="" type="checkbox"/> | G8  |           | Unknown |       |               |          |        |
| <input checked="" type="checkbox"/> | G9  |           | Unknown |       |               |          |        |
| <input checked="" type="checkbox"/> | G10 |           | Unknown |       |               |          |        |
| <input checked="" type="checkbox"/> | G11 |           | Unknown |       |               |          |        |
| <input checked="" type="checkbox"/> | G12 |           | Unknown |       |               |          |        |
| <input checked="" type="checkbox"/> | H1  | FCER1A 24 | Unknown | 31.74 |               |          |        |
| <input checked="" type="checkbox"/> | H2  | FCER1A 24 | Unknown | 31.81 |               |          |        |
| <input checked="" type="checkbox"/> | H3  | FCER1A 24 | Unknown | 28.46 |               |          |        |
| <input checked="" type="checkbox"/> | H4  | FCER1A 26 | Unknown | 32.63 |               |          |        |
| <input checked="" type="checkbox"/> | H5  | FCER1A 26 | Unknown | 32.42 |               |          |        |
| <input checked="" type="checkbox"/> | H6  | FCER1A 26 | Unknown | 32.34 |               |          |        |
| <input checked="" type="checkbox"/> | H7  |           | Unknown |       |               |          |        |
| <input checked="" type="checkbox"/> | H8  |           | Unknown |       |               |          |        |
| <input checked="" type="checkbox"/> | H9  |           | Unknown |       |               |          |        |
| <input checked="" type="checkbox"/> | H10 |           | Unknown |       |               |          |        |
| <input checked="" type="checkbox"/> | H11 |           | Unknown |       |               |          |        |
| <input checked="" type="checkbox"/> | H12 |           | Unknown |       |               |          |        |

> - Late Cp call (last five cycles) has higher uncertainty

### Amplification Curves

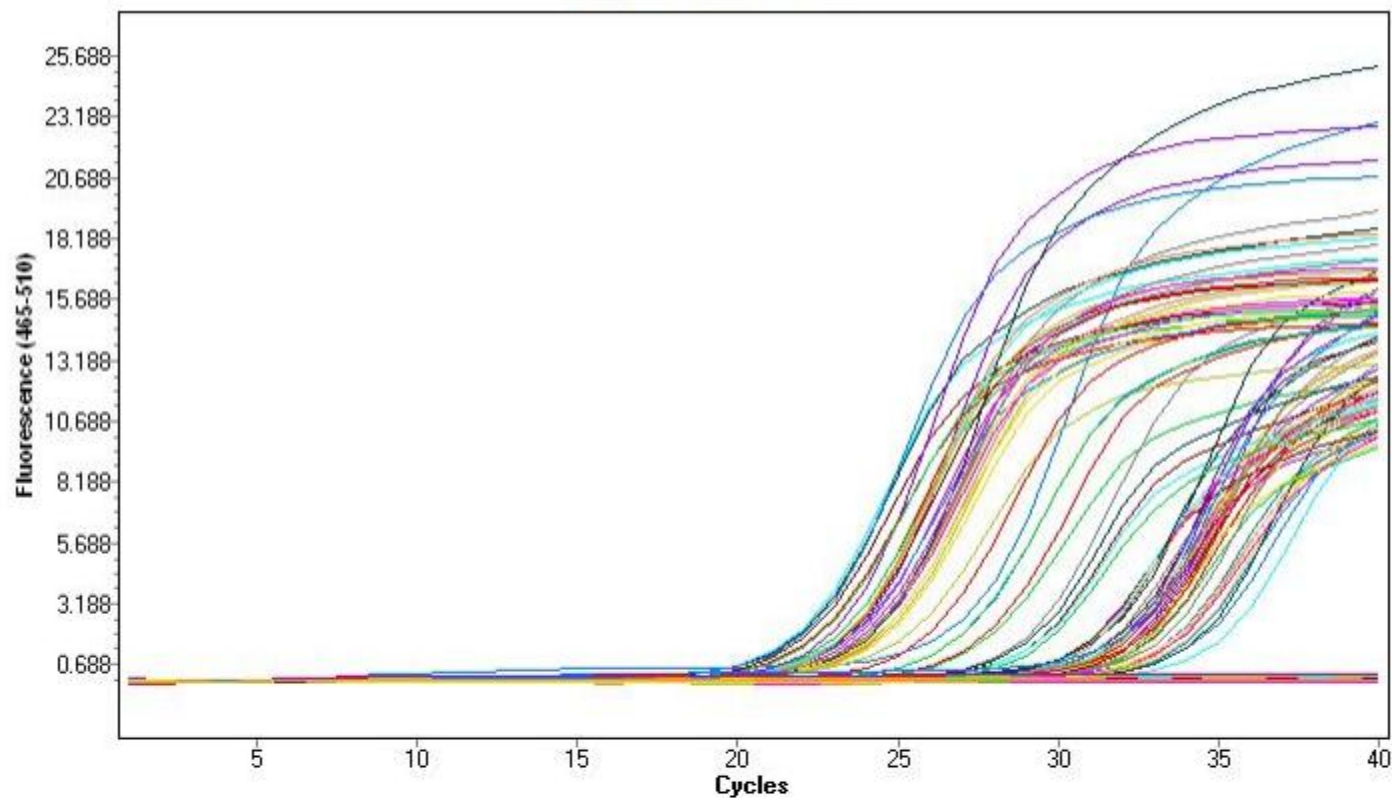

### Standard Curve

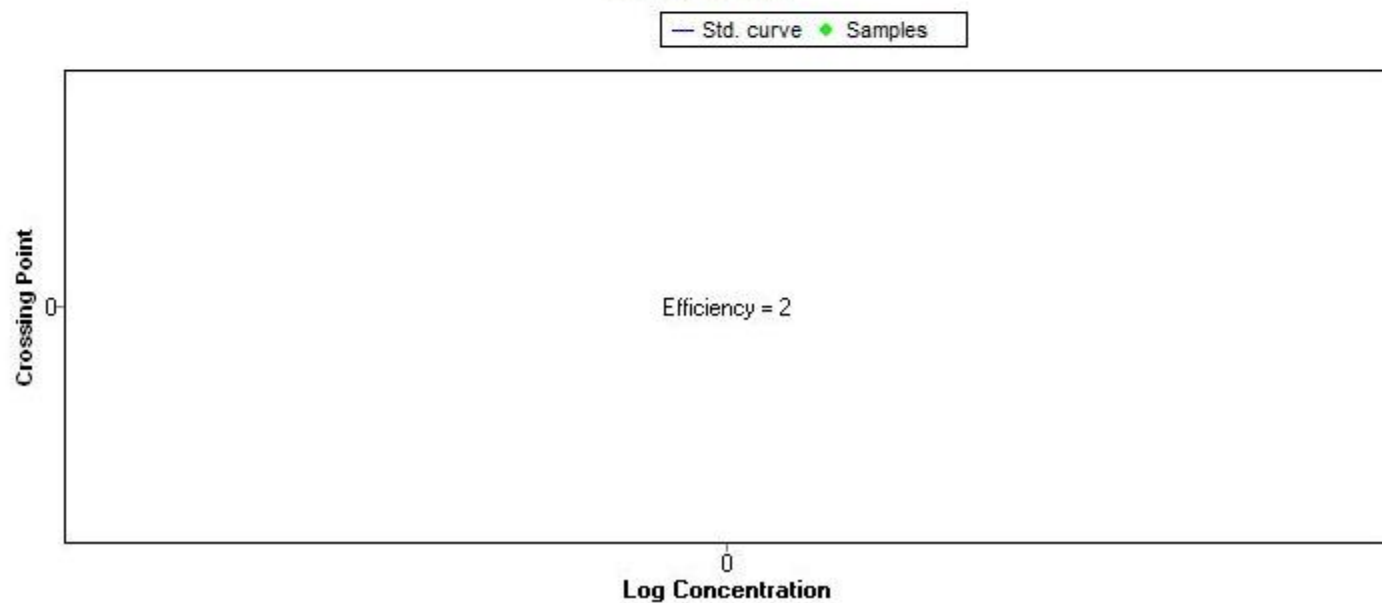

### Analysis Notes

**Abs Quant/2nd Derivative Max for All Samples (1) (Abs Quant/2nd Derivative Max)**



## Settings

|                    |                 |       |  |
|--------------------|-----------------|-------|--|
| Channel            | 465-510         |       |  |
| Color Compensation | Off             |       |  |
| Program            | Program         | Units |  |
| Mode               | High Confidence |       |  |

|             |             |
|-------------|-------------|
| Subset Name | All Samples |
|-------------|-------------|

## Results

| Inc                                 | Pos | Name     | Type    | CP | Concentration | Standard | Status |
|-------------------------------------|-----|----------|---------|----|---------------|----------|--------|
| <input checked="" type="checkbox"/> | A1  | GAPDH 1  | Unknown |    |               |          |        |
| <input checked="" type="checkbox"/> | A2  | GAPDH 1  | Unknown |    |               |          |        |
| <input checked="" type="checkbox"/> | A3  | GAPDH 1  | Unknown |    |               |          |        |
| <input checked="" type="checkbox"/> | A4  | GAPDH 2  | Unknown |    |               |          |        |
| <input checked="" type="checkbox"/> | A5  | GAPDH 2  | Unknown |    |               |          |        |
| <input checked="" type="checkbox"/> | A6  | GAPDH 2  | Unknown |    |               |          |        |
| <input checked="" type="checkbox"/> | A7  | GAPDH 3  | Unknown |    |               |          |        |
| <input checked="" type="checkbox"/> | A8  | GAPDH 3  | Unknown |    |               |          |        |
| <input checked="" type="checkbox"/> | A9  | GAPDH 3  | Unknown |    |               |          |        |
| <input checked="" type="checkbox"/> | A10 | GAPDH 4  | Unknown |    |               |          |        |
| <input checked="" type="checkbox"/> | A11 | GAPDH 4  | Unknown |    |               |          |        |
| <input checked="" type="checkbox"/> | A12 | GAPDH 4  | Unknown |    |               |          |        |
| <input checked="" type="checkbox"/> | B1  | FCER1A 1 | Unknown |    |               |          |        |
| <input checked="" type="checkbox"/> | B2  | FCER1A 1 | Unknown |    |               |          |        |
| <input checked="" type="checkbox"/> | B3  | FCER1A 1 | Unknown |    |               |          |        |
| <input checked="" type="checkbox"/> | B4  | FCER1A 2 | Unknown |    |               |          |        |
| <input checked="" type="checkbox"/> | B5  | FCER1A 2 | Unknown |    |               |          |        |
| <input checked="" type="checkbox"/> | B6  | FCER1A 2 | Unknown |    |               |          |        |
| <input checked="" type="checkbox"/> | B7  | FCER1A 3 | Unknown |    |               |          |        |
| <input checked="" type="checkbox"/> | B8  | FCER1A 3 | Unknown |    |               |          |        |
| <input checked="" type="checkbox"/> | B9  | FCER1A 3 | Unknown |    |               |          |        |
| <input checked="" type="checkbox"/> | B10 | FCER1A 4 | Unknown |    |               |          |        |
| <input checked="" type="checkbox"/> | B11 | FCER1A 4 | Unknown |    |               |          |        |
| <input checked="" type="checkbox"/> | B12 | FCER1A 4 | Unknown |    |               |          |        |
| <input checked="" type="checkbox"/> | C1  | GAPDH 5  | Unknown |    |               |          |        |
| <input checked="" type="checkbox"/> | C2  | GAPDH 5  | Unknown |    |               |          |        |
| <input checked="" type="checkbox"/> | C3  | GAPDH 5  | Unknown |    |               |          |        |
| <input checked="" type="checkbox"/> | C4  | GAPDH 7  | Unknown |    |               |          |        |
| <input checked="" type="checkbox"/> | C5  | GAPDH 7  | Unknown |    |               |          |        |
| <input checked="" type="checkbox"/> | C6  | GAPDH 7  | Unknown |    |               |          |        |

## Results

| Inc                                 | Pos | Name      | Type    | CP | Concentration | Standard | Status |
|-------------------------------------|-----|-----------|---------|----|---------------|----------|--------|
| <input checked="" type="checkbox"/> | C7  | GAPDH 11  | Unknown |    |               |          |        |
| <input checked="" type="checkbox"/> | C8  | GAPDH 11  | Unknown |    |               |          |        |
| <input checked="" type="checkbox"/> | C9  | GAPDH 11  | Unknown |    |               |          |        |
| <input checked="" type="checkbox"/> | C10 | GAPDH 14  | Unknown |    |               |          |        |
| <input checked="" type="checkbox"/> | C11 | GAPDH 14  | Unknown |    |               |          |        |
| <input checked="" type="checkbox"/> | C12 | GAPDH 14  | Unknown |    |               |          |        |
| <input checked="" type="checkbox"/> | D1  | FCER1A 5  | Unknown |    |               |          |        |
| <input checked="" type="checkbox"/> | D2  | FCER1A 5  | Unknown |    |               |          |        |
| <input checked="" type="checkbox"/> | D3  | FCER1A 5  | Unknown |    |               |          |        |
| <input checked="" type="checkbox"/> | D4  | FCER1A 7  | Unknown |    |               |          |        |
| <input checked="" type="checkbox"/> | D5  | FCER1A 7  | Unknown |    |               |          |        |
| <input checked="" type="checkbox"/> | D6  | FCER1A 7  | Unknown |    |               |          |        |
| <input checked="" type="checkbox"/> | D7  | FCER1A 11 | Unknown |    |               |          |        |
| <input checked="" type="checkbox"/> | D8  | FCER1A 11 | Unknown |    |               |          |        |
| <input checked="" type="checkbox"/> | D9  | FCER1A 11 | Unknown |    |               |          |        |
| <input checked="" type="checkbox"/> | D10 | FCER1A 14 | Unknown |    |               |          |        |
| <input checked="" type="checkbox"/> | D11 | FCER1A 14 | Unknown |    |               |          |        |
| <input checked="" type="checkbox"/> | D12 | FCER1A 14 | Unknown |    |               |          |        |
| <input checked="" type="checkbox"/> | E1  | GAPDH 15  | Unknown |    |               |          |        |
| <input checked="" type="checkbox"/> | E2  | GAPDH 15  | Unknown |    |               |          |        |
| <input checked="" type="checkbox"/> | E3  | GAPDH 15  | Unknown |    |               |          |        |
| <input checked="" type="checkbox"/> | E4  | GAPDH 18  | Unknown |    |               |          |        |
| <input checked="" type="checkbox"/> | E5  | GAPDH 18  | Unknown |    |               |          |        |
| <input checked="" type="checkbox"/> | E6  | GAPDH 18  | Unknown |    |               |          |        |
| <input checked="" type="checkbox"/> | E7  | GAPDH 19  | Unknown |    |               |          |        |
| <input checked="" type="checkbox"/> | E8  | GAPDH 19  | Unknown |    |               |          |        |
| <input checked="" type="checkbox"/> | E9  | GAPDH 19  | Unknown |    |               |          |        |
| <input checked="" type="checkbox"/> | E10 | GAPDH 20  | Unknown |    |               |          |        |
| <input checked="" type="checkbox"/> | E11 | GAPDH 20  | Unknown |    |               |          |        |
| <input checked="" type="checkbox"/> | E12 | GAPDH 20  | Unknown |    |               |          |        |
| <input checked="" type="checkbox"/> | F1  | FCER1A 15 | Unknown |    |               |          |        |
| <input checked="" type="checkbox"/> | F2  | FCER1A 15 | Unknown |    |               |          |        |
| <input checked="" type="checkbox"/> | F3  | FCER1A 15 | Unknown |    |               |          |        |
| <input checked="" type="checkbox"/> | F4  | FCER1A 18 | Unknown |    |               |          |        |
| <input checked="" type="checkbox"/> | F5  | FCER1A 18 | Unknown |    |               |          |        |
| <input checked="" type="checkbox"/> | F6  | FCER1A 18 | Unknown |    |               |          |        |
| <input checked="" type="checkbox"/> | F7  | FCER1A 19 | Unknown |    |               |          |        |

---

**Results**

| Inc                                 | Pos | Name      | Type    | CP | Concentration | Standard | Status |
|-------------------------------------|-----|-----------|---------|----|---------------|----------|--------|
| <input checked="" type="checkbox"/> | F8  | FCER1A 19 | Unknown |    |               |          |        |
| <input checked="" type="checkbox"/> | F9  | FCER1A 19 | Unknown |    |               |          |        |
| <input checked="" type="checkbox"/> | F10 | FCER1A 20 | Unknown |    |               |          |        |
| <input checked="" type="checkbox"/> | F11 | FCER1A 20 | Unknown |    |               |          |        |
| <input checked="" type="checkbox"/> | F12 | FCER1A 20 | Unknown |    |               |          |        |
| <input checked="" type="checkbox"/> | G1  | GAPDH 24  | Unknown |    |               |          |        |
| <input checked="" type="checkbox"/> | G2  | GAPDH 24  | Unknown |    |               |          |        |
| <input checked="" type="checkbox"/> | G3  | GAPDH 24  | Unknown |    |               |          |        |
| <input checked="" type="checkbox"/> | G4  | GAPDH 26  | Unknown |    |               |          |        |
| <input checked="" type="checkbox"/> | G5  | GAPDH 26  | Unknown |    |               |          |        |
| <input checked="" type="checkbox"/> | G6  | GAPDH 26  | Unknown |    |               |          |        |
| <input checked="" type="checkbox"/> | G7  |           | Unknown |    |               |          |        |
| <input checked="" type="checkbox"/> | G8  |           | Unknown |    |               |          |        |
| <input checked="" type="checkbox"/> | G9  |           | Unknown |    |               |          |        |
| <input checked="" type="checkbox"/> | G10 |           | Unknown |    |               |          |        |
| <input checked="" type="checkbox"/> | G11 |           | Unknown |    |               |          |        |
| <input checked="" type="checkbox"/> | G12 |           | Unknown |    |               |          |        |
| <input checked="" type="checkbox"/> | H1  | FCER1A 24 | Unknown |    |               |          |        |
| <input checked="" type="checkbox"/> | H2  | FCER1A 24 | Unknown |    |               |          |        |
| <input checked="" type="checkbox"/> | H3  | FCER1A 24 | Unknown |    |               |          |        |
| <input checked="" type="checkbox"/> | H4  | FCER1A 26 | Unknown |    |               |          |        |
| <input checked="" type="checkbox"/> | H5  | FCER1A 26 | Unknown |    |               |          |        |
| <input checked="" type="checkbox"/> | H6  | FCER1A 26 | Unknown |    |               |          |        |
| <input checked="" type="checkbox"/> | H7  |           | Unknown |    |               |          |        |
| <input checked="" type="checkbox"/> | H8  |           | Unknown |    |               |          |        |
| <input checked="" type="checkbox"/> | H9  |           | Unknown |    |               |          |        |
| <input checked="" type="checkbox"/> | H10 |           | Unknown |    |               |          |        |
| <input checked="" type="checkbox"/> | H11 |           | Unknown |    |               |          |        |
| <input checked="" type="checkbox"/> | H12 |           | Unknown |    |               |          |        |

### Amplification Curves



### Standard Curve

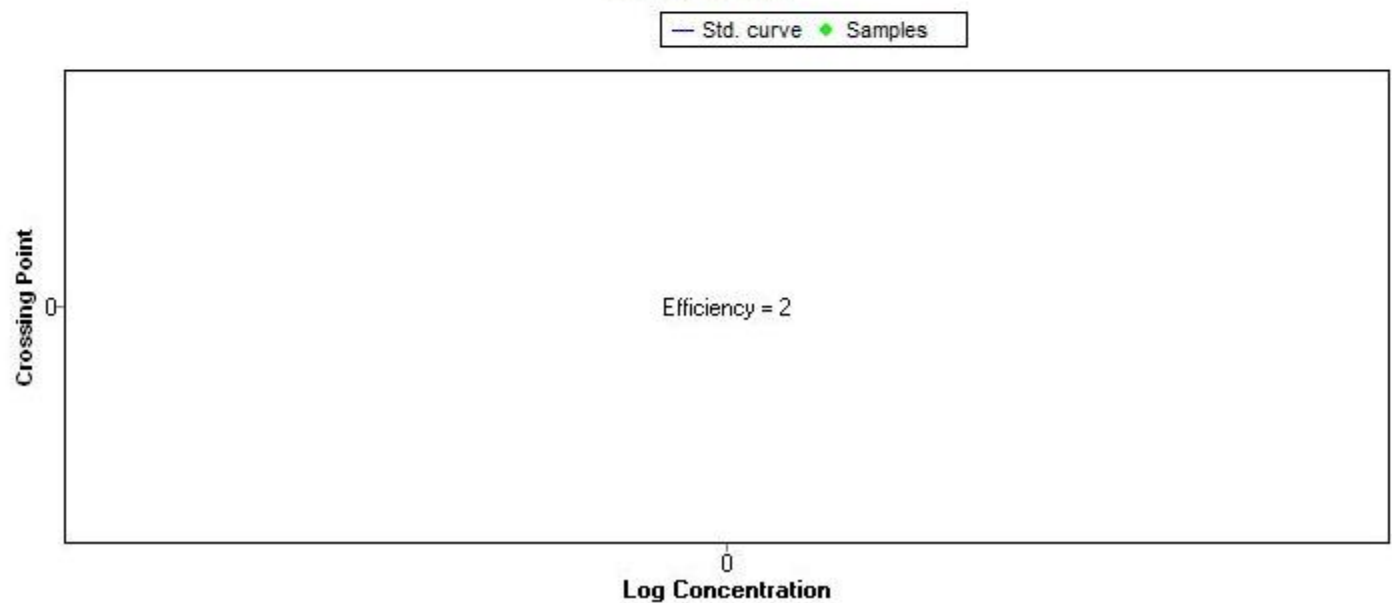

### Analysis Notes

Abs Quant/2nd Derivative Max for All Samples (2) (Abs Quant/2nd Derivative Max)

## Settings

|                    |                 |       |  |
|--------------------|-----------------|-------|--|
| Channel            | 465-510         |       |  |
| Color Compensation | Off             |       |  |
| Program            | Program         | Units |  |
| Mode               | High Confidence |       |  |

|             |             |
|-------------|-------------|
| Subset Name | All Samples |
|-------------|-------------|

## Results

| Inc                                 | Pos | Name     | Type    | CP    | Concentration | Standard | Status |
|-------------------------------------|-----|----------|---------|-------|---------------|----------|--------|
| <input checked="" type="checkbox"/> | A1  | GAPDH 1  | Unknown | 26.99 |               |          |        |
| <input checked="" type="checkbox"/> | A2  | GAPDH 1  | Unknown | 27.00 |               |          |        |
| <input checked="" type="checkbox"/> | A3  | GAPDH 1  | Unknown | 26.92 |               |          |        |
| <input checked="" type="checkbox"/> | A4  | GAPDH 2  | Unknown | 30.88 |               |          |        |
| <input checked="" type="checkbox"/> | A5  | GAPDH 2  | Unknown | 28.54 |               |          |        |
| <input checked="" type="checkbox"/> | A6  | GAPDH 2  | Unknown | 31.58 |               |          |        |
| <input checked="" type="checkbox"/> | A7  | GAPDH 3  | Unknown | 21.53 |               |          |        |
| <input checked="" type="checkbox"/> | A8  | GAPDH 3  | Unknown | 21.33 |               |          |        |
| <input checked="" type="checkbox"/> | A9  | GAPDH 3  | Unknown | 21.59 |               |          |        |
| <input checked="" type="checkbox"/> | A10 | GAPDH 4  | Unknown | 31.85 |               |          |        |
| <input checked="" type="checkbox"/> | A11 | GAPDH 4  | Unknown | 32.06 |               |          |        |
| <input checked="" type="checkbox"/> | A12 | GAPDH 4  | Unknown | 24.61 |               |          |        |
| <input checked="" type="checkbox"/> | B1  | FCER1A 1 | Unknown | 33.73 |               |          |        |
| <input checked="" type="checkbox"/> | B2  | FCER1A 1 | Unknown |       |               |          |        |
| <input checked="" type="checkbox"/> | B3  | FCER1A 1 | Unknown |       |               |          |        |
| <input checked="" type="checkbox"/> | B4  | FCER1A 2 | Unknown |       |               |          |        |
| <input checked="" type="checkbox"/> | B5  | FCER1A 2 | Unknown | 31.89 |               |          |        |
| <input checked="" type="checkbox"/> | B6  | FCER1A 2 | Unknown | 33.00 |               |          |        |
| <input checked="" type="checkbox"/> | B7  | FCER1A 3 | Unknown | 28.30 |               |          |        |
| <input checked="" type="checkbox"/> | B8  | FCER1A 3 | Unknown | 28.24 |               |          |        |
| <input checked="" type="checkbox"/> | B9  | FCER1A 3 | Unknown | 28.11 |               |          |        |
| <input checked="" type="checkbox"/> | B10 | FCER1A 4 | Unknown | 32.36 |               |          |        |
| <input checked="" type="checkbox"/> | B11 | FCER1A 4 | Unknown | 31.51 |               |          |        |
| <input checked="" type="checkbox"/> | B12 | FCER1A 4 | Unknown | 31.62 |               |          |        |
| <input checked="" type="checkbox"/> | C1  | GAPDH 5  | Unknown | 26.27 |               |          |        |
| <input checked="" type="checkbox"/> | C2  | GAPDH 5  | Unknown | 25.29 |               |          |        |
| <input checked="" type="checkbox"/> | C3  | GAPDH 5  | Unknown | 26.26 |               |          |        |
| <input checked="" type="checkbox"/> | C4  | GAPDH 7  | Unknown | 23.09 |               |          |        |
| <input checked="" type="checkbox"/> | C5  | GAPDH 7  | Unknown | 23.88 |               |          |        |
| <input checked="" type="checkbox"/> | C6  | GAPDH 7  | Unknown | 23.99 |               |          |        |

> - Late Cp call (last five cycles) has higher uncertainty

## Results

| Inc                                 | Pos | Name      | Type    | CP    | Concentration | Standard | Status |
|-------------------------------------|-----|-----------|---------|-------|---------------|----------|--------|
| <input checked="" type="checkbox"/> | C7  | GAPDH 11  | Unknown | 31.24 |               |          |        |
| <input checked="" type="checkbox"/> | C8  | GAPDH 11  | Unknown | 31.46 |               |          |        |
| <input checked="" type="checkbox"/> | C9  | GAPDH 11  | Unknown | 31.24 |               |          |        |
| <input checked="" type="checkbox"/> | C10 | GAPDH 14  | Unknown | 23.89 |               |          |        |
| <input checked="" type="checkbox"/> | C11 | GAPDH 14  | Unknown | 23.51 |               |          |        |
| <input checked="" type="checkbox"/> | C12 | GAPDH 14  | Unknown | 24.00 |               |          |        |
| <input checked="" type="checkbox"/> | D1  | FCER1A 5  | Unknown | 32.99 |               |          |        |
| <input checked="" type="checkbox"/> | D2  | FCER1A 5  | Unknown | 31.88 |               |          |        |
| <input checked="" type="checkbox"/> | D3  | FCER1A 5  | Unknown | 32.41 |               |          |        |
| <input checked="" type="checkbox"/> | D4  | FCER1A 7  | Unknown | 31.12 |               |          |        |
| <input checked="" type="checkbox"/> | D5  | FCER1A 7  | Unknown | 31.92 |               |          |        |
| <input checked="" type="checkbox"/> | D6  | FCER1A 7  | Unknown | 31.28 |               |          |        |
| <input checked="" type="checkbox"/> | D7  | FCER1A 11 | Unknown | 31.55 |               |          |        |
| <input checked="" type="checkbox"/> | D8  | FCER1A 11 | Unknown | 35.00 |               |          | >      |
| <input checked="" type="checkbox"/> | D9  | FCER1A 11 | Unknown | 33.80 |               |          |        |
| <input checked="" type="checkbox"/> | D10 | FCER1A 14 | Unknown | 32.30 |               |          |        |
| <input checked="" type="checkbox"/> | D11 | FCER1A 14 | Unknown | 31.67 |               |          |        |
| <input checked="" type="checkbox"/> | D12 | FCER1A 14 | Unknown | 31.21 |               |          |        |
| <input checked="" type="checkbox"/> | E1  | GAPDH 15  | Unknown | 22.94 |               |          |        |
| <input checked="" type="checkbox"/> | E2  | GAPDH 15  | Unknown | 22.68 |               |          |        |
| <input checked="" type="checkbox"/> | E3  | GAPDH 15  | Unknown | 22.51 |               |          |        |
| <input checked="" type="checkbox"/> | E4  | GAPDH 18  | Unknown | 23.62 |               |          |        |
| <input checked="" type="checkbox"/> | E5  | GAPDH 18  | Unknown | 23.66 |               |          |        |
| <input checked="" type="checkbox"/> | E6  | GAPDH 18  | Unknown | 23.62 |               |          |        |
| <input checked="" type="checkbox"/> | E7  | GAPDH 19  | Unknown | 22.90 |               |          |        |
| <input checked="" type="checkbox"/> | E8  | GAPDH 19  | Unknown | 23.00 |               |          |        |
| <input checked="" type="checkbox"/> | E9  | GAPDH 19  | Unknown | 24.31 |               |          |        |
| <input checked="" type="checkbox"/> | E10 | GAPDH 20  | Unknown | 22.95 |               |          |        |
| <input checked="" type="checkbox"/> | E11 | GAPDH 20  | Unknown | 22.85 |               |          |        |
| <input checked="" type="checkbox"/> | E12 | GAPDH 20  | Unknown | 22.86 |               |          |        |
| <input checked="" type="checkbox"/> | F1  | FCER1A 15 | Unknown | 32.29 |               |          |        |
| <input checked="" type="checkbox"/> | F2  | FCER1A 15 | Unknown | 31.06 |               |          |        |
| <input checked="" type="checkbox"/> | F3  | FCER1A 15 | Unknown | 31.63 |               |          |        |
| <input checked="" type="checkbox"/> | F4  | FCER1A 18 | Unknown | 29.90 |               |          |        |
| <input checked="" type="checkbox"/> | F5  | FCER1A 18 | Unknown | 30.62 |               |          |        |
| <input checked="" type="checkbox"/> | F6  | FCER1A 18 | Unknown | 31.15 |               |          |        |
| <input checked="" type="checkbox"/> | F7  | FCER1A 19 | Unknown | 29.75 |               |          |        |

> - Late Cp call (last five cycles) has higher uncertainty

## Results

| Inc                                 | Pos | Name      | Type    | CP    | Concentration | Standard | Status |
|-------------------------------------|-----|-----------|---------|-------|---------------|----------|--------|
| <input checked="" type="checkbox"/> | F8  | FCER1A 19 | Unknown | 29.98 |               |          |        |
| <input checked="" type="checkbox"/> | F9  | FCER1A 19 | Unknown | 30.63 |               |          |        |
| <input checked="" type="checkbox"/> | F10 | FCER1A 20 | Unknown | 30.12 |               |          |        |
| <input checked="" type="checkbox"/> | F11 | FCER1A 20 | Unknown | 31.40 |               |          |        |
| <input checked="" type="checkbox"/> | F12 | FCER1A 20 | Unknown | 30.90 |               |          |        |
| <input checked="" type="checkbox"/> | G1  | GAPDH 24  | Unknown | 21.98 |               |          |        |
| <input checked="" type="checkbox"/> | G2  | GAPDH 24  | Unknown | 21.79 |               |          |        |
| <input checked="" type="checkbox"/> | G3  | GAPDH 24  | Unknown | 21.94 |               |          |        |
| <input checked="" type="checkbox"/> | G4  | GAPDH 26  | Unknown | 23.57 |               |          |        |
| <input checked="" type="checkbox"/> | G5  | GAPDH 26  | Unknown | 23.78 |               |          |        |
| <input checked="" type="checkbox"/> | G6  | GAPDH 26  | Unknown | 23.78 |               |          |        |
| <input checked="" type="checkbox"/> | G7  |           | Unknown |       |               |          |        |
| <input checked="" type="checkbox"/> | G8  |           | Unknown |       |               |          |        |
| <input checked="" type="checkbox"/> | G9  |           | Unknown |       |               |          |        |
| <input checked="" type="checkbox"/> | G10 |           | Unknown |       |               |          |        |
| <input checked="" type="checkbox"/> | G11 |           | Unknown |       |               |          |        |
| <input checked="" type="checkbox"/> | G12 |           | Unknown |       |               |          |        |
| <input checked="" type="checkbox"/> | H1  | FCER1A 24 | Unknown | 31.74 |               |          |        |
| <input checked="" type="checkbox"/> | H2  | FCER1A 24 | Unknown | 31.81 |               |          |        |
| <input checked="" type="checkbox"/> | H3  | FCER1A 24 | Unknown | 28.46 |               |          |        |
| <input checked="" type="checkbox"/> | H4  | FCER1A 26 | Unknown | 32.63 |               |          |        |
| <input checked="" type="checkbox"/> | H5  | FCER1A 26 | Unknown | 32.42 |               |          |        |
| <input checked="" type="checkbox"/> | H6  | FCER1A 26 | Unknown | 32.34 |               |          |        |
| <input checked="" type="checkbox"/> | H7  |           | Unknown |       |               |          |        |
| <input checked="" type="checkbox"/> | H8  |           | Unknown |       |               |          |        |
| <input checked="" type="checkbox"/> | H9  |           | Unknown |       |               |          |        |
| <input checked="" type="checkbox"/> | H10 |           | Unknown |       |               |          |        |
| <input checked="" type="checkbox"/> | H11 |           | Unknown |       |               |          |        |
| <input checked="" type="checkbox"/> | H12 |           | Unknown |       |               |          |        |

> - Late Cp call (last five cycles) has higher uncertainty

### Amplification Curves

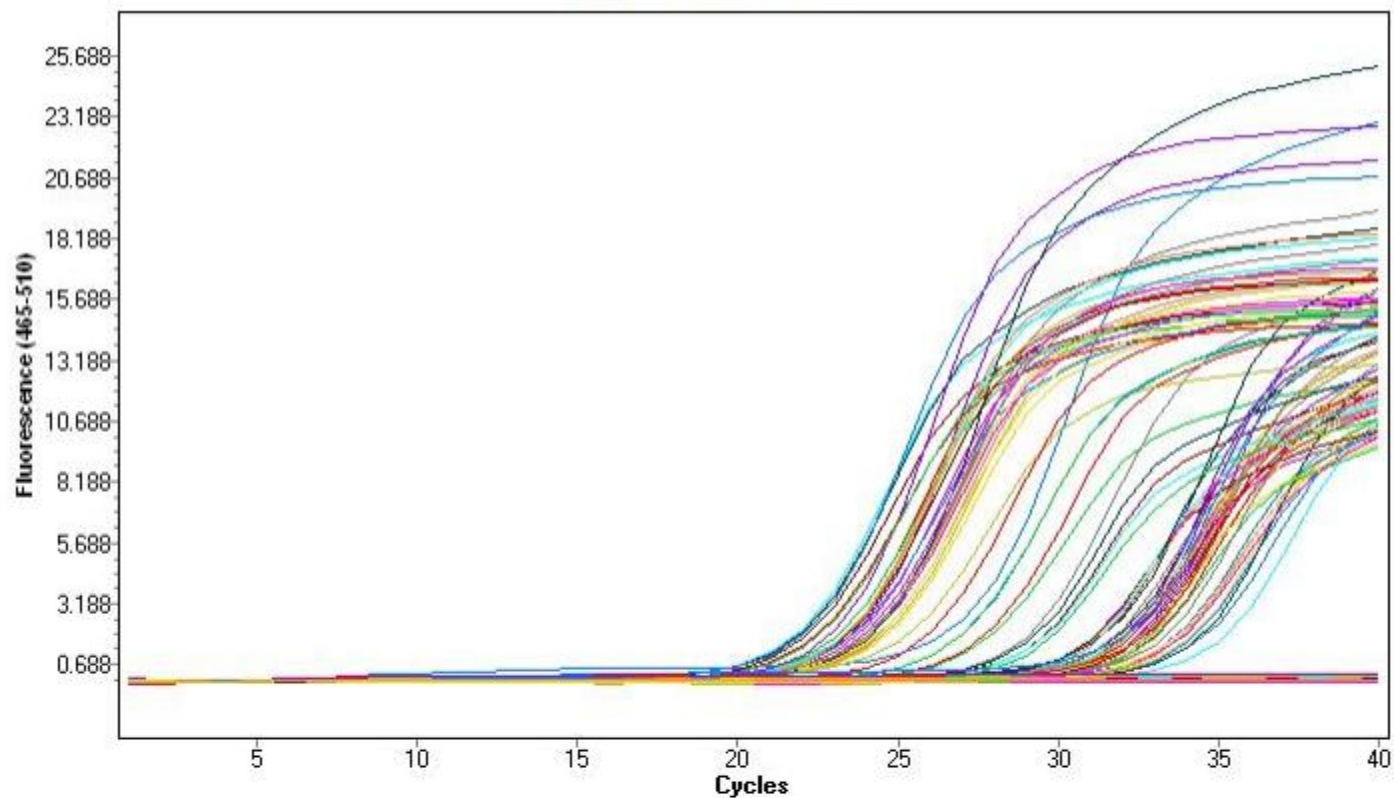

### Standard Curve



### Analysis Notes

Abs Quant/Fit Points for All Samples (Abs Quant/Fit Points)



## Settings

|                    |                       |                  |        |                    |         |  |
|--------------------|-----------------------|------------------|--------|--------------------|---------|--|
| Channel            | 465-510               |                  |        |                    |         |  |
| Color Compensation | Off                   |                  |        |                    |         |  |
| Standard Curve     | Set Efficiency (2.00) |                  |        |                    |         |  |
| Program            | Program               |                  |        |                    | Units   |  |
| First Cycle        | 1                     | Last Cycle       | 40     | Background         | 2-6     |  |
| Noiseband Method   | Auto                  | Noiseband        | 0.5193 | STD Dev Multiplier | 12.0000 |  |
| # of Fit Points    | 2                     | Threshold Method | Auto   | Threshold          | 0.5193  |  |

|             |             |
|-------------|-------------|
| Subset Name | All Samples |
|-------------|-------------|

## Results

| Inc                                 | Pos | Name     | Type    | CP    | Concentration | Standard | Status |
|-------------------------------------|-----|----------|---------|-------|---------------|----------|--------|
| <input checked="" type="checkbox"/> | A1  | GAPDH 1  | Unknown | 9.86  |               |          |        |
| <input checked="" type="checkbox"/> | A2  | GAPDH 1  | Unknown | 25.08 |               |          |        |
| <input checked="" type="checkbox"/> | A3  | GAPDH 1  | Unknown | 24.98 |               |          |        |
| <input checked="" type="checkbox"/> | A4  | GAPDH 2  | Unknown | 29.63 |               |          |        |
| <input checked="" type="checkbox"/> | A5  | GAPDH 2  | Unknown | 26.46 |               |          |        |
| <input checked="" type="checkbox"/> | A6  | GAPDH 2  | Unknown | 29.61 |               |          |        |
| <input checked="" type="checkbox"/> | A7  | GAPDH 3  | Unknown | 19.44 |               |          |        |
| <input checked="" type="checkbox"/> | A8  | GAPDH 3  | Unknown | 18.81 |               |          |        |
| <input checked="" type="checkbox"/> | A9  | GAPDH 3  | Unknown | 18.79 |               |          |        |
| <input checked="" type="checkbox"/> | A10 | GAPDH 4  | Unknown | 30.00 |               |          |        |
| <input checked="" type="checkbox"/> | A11 | GAPDH 4  | Unknown | 29.96 |               |          |        |
| <input checked="" type="checkbox"/> | A12 | GAPDH 4  | Unknown | 19.05 |               |          |        |
| <input checked="" type="checkbox"/> | B1  | FCER1A 1 | Unknown | 31.68 |               |          |        |
| <input checked="" type="checkbox"/> | B2  | FCER1A 1 | Unknown |       |               |          |        |
| <input checked="" type="checkbox"/> | B3  | FCER1A 1 | Unknown |       |               |          |        |
| <input checked="" type="checkbox"/> | B4  | FCER1A 2 | Unknown |       |               |          |        |
| <input checked="" type="checkbox"/> | B5  | FCER1A 2 | Unknown | 30.31 |               |          |        |
| <input checked="" type="checkbox"/> | B6  | FCER1A 2 | Unknown | 31.50 |               |          |        |
| <input checked="" type="checkbox"/> | B7  | FCER1A 3 | Unknown | 26.83 |               |          |        |
| <input checked="" type="checkbox"/> | B8  | FCER1A 3 | Unknown | 26.94 |               |          |        |
| <input checked="" type="checkbox"/> | B9  | FCER1A 3 | Unknown | 26.54 |               |          |        |
| <input checked="" type="checkbox"/> | B10 | FCER1A 4 | Unknown | 31.36 |               |          |        |
| <input checked="" type="checkbox"/> | B11 | FCER1A 4 | Unknown | 30.21 |               |          |        |
| <input checked="" type="checkbox"/> | B12 | FCER1A 4 | Unknown | 30.41 |               |          |        |
| <input checked="" type="checkbox"/> | C1  | GAPDH 5  | Unknown | 24.39 |               |          |        |
| <input checked="" type="checkbox"/> | C2  | GAPDH 5  | Unknown | 23.27 |               |          |        |
| <input checked="" type="checkbox"/> | C3  | GAPDH 5  | Unknown | 24.24 |               |          |        |

## Results

| Inc                                 | Pos | Name      | Type    | CP    | Concentration | Standard | Status |
|-------------------------------------|-----|-----------|---------|-------|---------------|----------|--------|
| <input checked="" type="checkbox"/> | C4  | GAPDH 7   | Unknown | 21.00 |               |          |        |
| <input checked="" type="checkbox"/> | C5  | GAPDH 7   | Unknown | 20.65 |               |          |        |
| <input checked="" type="checkbox"/> | C6  | GAPDH 7   | Unknown | 21.58 |               |          |        |
| <input checked="" type="checkbox"/> | C7  | GAPDH 11  | Unknown | 28.87 |               |          |        |
| <input checked="" type="checkbox"/> | C8  | GAPDH 11  | Unknown | 29.28 |               |          |        |
| <input checked="" type="checkbox"/> | C9  | GAPDH 11  | Unknown | 27.40 |               |          |        |
| <input checked="" type="checkbox"/> | C10 | GAPDH 14  | Unknown | 21.58 |               |          |        |
| <input checked="" type="checkbox"/> | C11 | GAPDH 14  | Unknown | 20.69 |               |          |        |
| <input checked="" type="checkbox"/> | C12 | GAPDH 14  | Unknown | 21.76 |               |          |        |
| <input checked="" type="checkbox"/> | D1  | FCER1A 5  | Unknown | 31.65 |               |          |        |
| <input checked="" type="checkbox"/> | D2  | FCER1A 5  | Unknown | 30.57 |               |          |        |
| <input checked="" type="checkbox"/> | D3  | FCER1A 5  | Unknown | 31.27 |               |          |        |
| <input checked="" type="checkbox"/> | D4  | FCER1A 7  | Unknown | 29.38 |               |          |        |
| <input checked="" type="checkbox"/> | D5  | FCER1A 7  | Unknown | 29.48 |               |          |        |
| <input checked="" type="checkbox"/> | D6  | FCER1A 7  | Unknown | 29.28 |               |          |        |
| <input checked="" type="checkbox"/> | D7  | FCER1A 11 | Unknown | 29.95 |               |          |        |
| <input checked="" type="checkbox"/> | D8  | FCER1A 11 | Unknown | 32.44 |               |          |        |
| <input checked="" type="checkbox"/> | D9  | FCER1A 11 | Unknown | 31.83 |               |          |        |
| <input checked="" type="checkbox"/> | D10 | FCER1A 14 | Unknown | 30.52 |               |          |        |
| <input checked="" type="checkbox"/> | D11 | FCER1A 14 | Unknown | 29.64 |               |          |        |
| <input checked="" type="checkbox"/> | D12 | FCER1A 14 | Unknown | 29.58 |               |          |        |
| <input checked="" type="checkbox"/> | E1  | GAPDH 15  | Unknown | 20.53 |               |          |        |
| <input checked="" type="checkbox"/> | E2  | GAPDH 15  | Unknown | 20.09 |               |          |        |
| <input checked="" type="checkbox"/> | E3  | GAPDH 15  | Unknown | 20.32 |               |          |        |
| <input checked="" type="checkbox"/> | E4  | GAPDH 18  | Unknown | 21.37 |               |          |        |
| <input checked="" type="checkbox"/> | E5  | GAPDH 18  | Unknown | 20.84 |               |          |        |
| <input checked="" type="checkbox"/> | E6  | GAPDH 18  | Unknown | 21.16 |               |          |        |
| <input checked="" type="checkbox"/> | E7  | GAPDH 19  | Unknown | 20.63 |               |          |        |
| <input checked="" type="checkbox"/> | E8  | GAPDH 19  | Unknown | 20.41 |               |          |        |
| <input checked="" type="checkbox"/> | E9  | GAPDH 19  | Unknown | 21.43 |               |          |        |
| <input checked="" type="checkbox"/> | E10 | GAPDH 20  | Unknown | 20.68 |               |          |        |
| <input checked="" type="checkbox"/> | E11 | GAPDH 20  | Unknown | 20.40 |               |          |        |
| <input checked="" type="checkbox"/> | E12 | GAPDH 20  | Unknown | 20.56 |               |          |        |
| <input checked="" type="checkbox"/> | F1  | FCER1A 15 | Unknown | 31.13 |               |          |        |
| <input checked="" type="checkbox"/> | F2  | FCER1A 15 | Unknown | 29.76 |               |          |        |
| <input checked="" type="checkbox"/> | F3  | FCER1A 15 | Unknown | 30.48 |               |          |        |
| <input checked="" type="checkbox"/> | F4  | FCER1A 18 | Unknown | 28.50 |               |          |        |

## Results

| Inc                                 | Pos | Name      | Type    | CP    | Concentration | Standard | Status |
|-------------------------------------|-----|-----------|---------|-------|---------------|----------|--------|
| <input checked="" type="checkbox"/> | F5  | FCER1A 18 | Unknown | 28.89 |               |          |        |
| <input checked="" type="checkbox"/> | F6  | FCER1A 18 | Unknown | 29.81 |               |          |        |
| <input checked="" type="checkbox"/> | F7  | FCER1A 19 | Unknown | 28.49 |               |          |        |
| <input checked="" type="checkbox"/> | F8  | FCER1A 19 | Unknown | 28.61 |               |          |        |
| <input checked="" type="checkbox"/> | F9  | FCER1A 19 | Unknown | 27.97 |               |          |        |
| <input checked="" type="checkbox"/> | F10 | FCER1A 20 | Unknown | 28.84 |               |          |        |
| <input checked="" type="checkbox"/> | F11 | FCER1A 20 | Unknown | 29.55 |               |          |        |
| <input checked="" type="checkbox"/> | F12 | FCER1A 20 | Unknown | 29.63 |               |          |        |
| <input checked="" type="checkbox"/> | G1  | GAPDH 24  | Unknown | 18.70 |               |          |        |
| <input checked="" type="checkbox"/> | G2  | GAPDH 24  | Unknown | 19.58 |               |          |        |
| <input checked="" type="checkbox"/> | G3  | GAPDH 24  | Unknown | 19.57 |               |          |        |
| <input checked="" type="checkbox"/> | G4  | GAPDH 26  | Unknown | 20.99 |               |          |        |
| <input checked="" type="checkbox"/> | G5  | GAPDH 26  | Unknown | 20.84 |               |          |        |
| <input checked="" type="checkbox"/> | G6  | GAPDH 26  | Unknown | 21.33 |               |          |        |
| <input checked="" type="checkbox"/> | G7  |           | Unknown |       |               |          |        |
| <input checked="" type="checkbox"/> | G8  |           | Unknown |       |               |          |        |
| <input checked="" type="checkbox"/> | G9  |           | Unknown |       |               |          |        |
| <input checked="" type="checkbox"/> | G10 |           | Unknown |       |               |          |        |
| <input checked="" type="checkbox"/> | G11 |           | Unknown |       |               |          |        |
| <input checked="" type="checkbox"/> | G12 |           | Unknown |       |               |          |        |
| <input checked="" type="checkbox"/> | H1  | FCER1A 24 | Unknown | 16.54 |               |          |        |
| <input checked="" type="checkbox"/> | H2  | FCER1A 24 | Unknown | 28.81 |               |          |        |
| <input checked="" type="checkbox"/> | H3  | FCER1A 24 | Unknown | 27.34 |               |          |        |
| <input checked="" type="checkbox"/> | H4  | FCER1A 26 | Unknown | 30.78 |               |          |        |
| <input checked="" type="checkbox"/> | H5  | FCER1A 26 | Unknown | 30.54 |               |          |        |
| <input checked="" type="checkbox"/> | H6  | FCER1A 26 | Unknown | 31.00 |               |          |        |
| <input checked="" type="checkbox"/> | H7  |           | Unknown |       |               |          |        |
| <input checked="" type="checkbox"/> | H8  |           | Unknown |       |               |          |        |
| <input checked="" type="checkbox"/> | H9  |           | Unknown |       |               |          |        |
| <input checked="" type="checkbox"/> | H10 |           | Unknown |       |               |          |        |
| <input checked="" type="checkbox"/> | H11 |           | Unknown | 36.28 |               |          |        |
| <input checked="" type="checkbox"/> | H12 |           | Unknown |       |               |          |        |

**Amplification Curves**

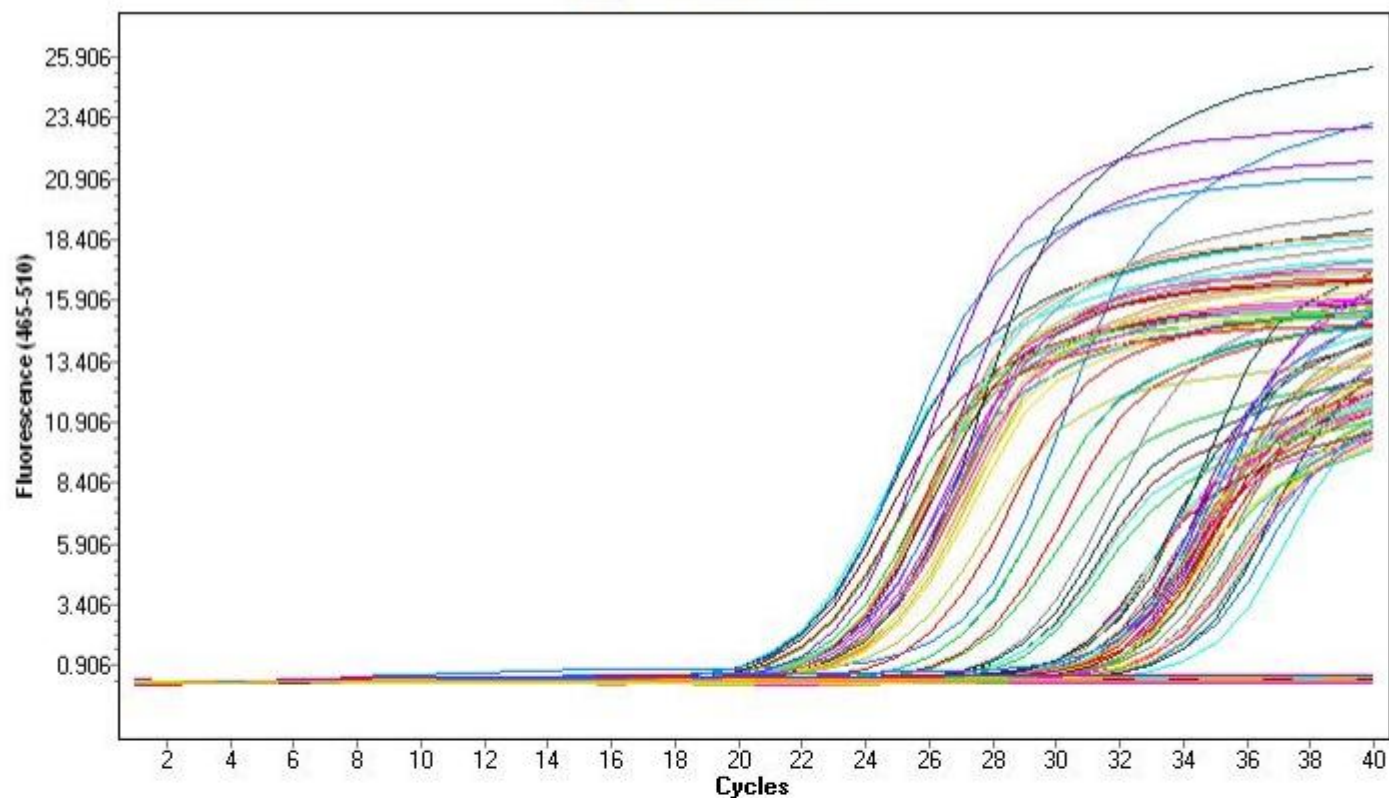

**Amplification Curves**

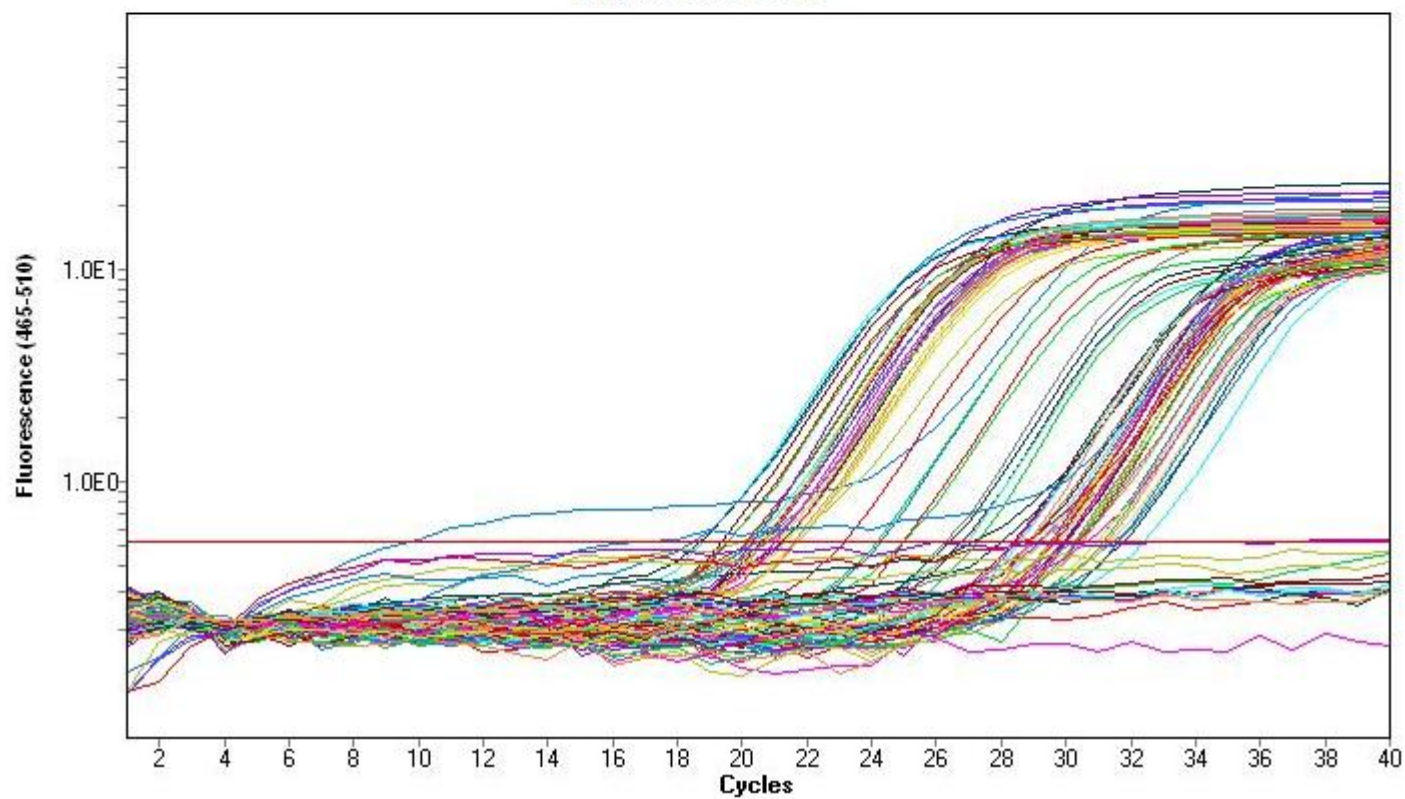

### Amplification Curves

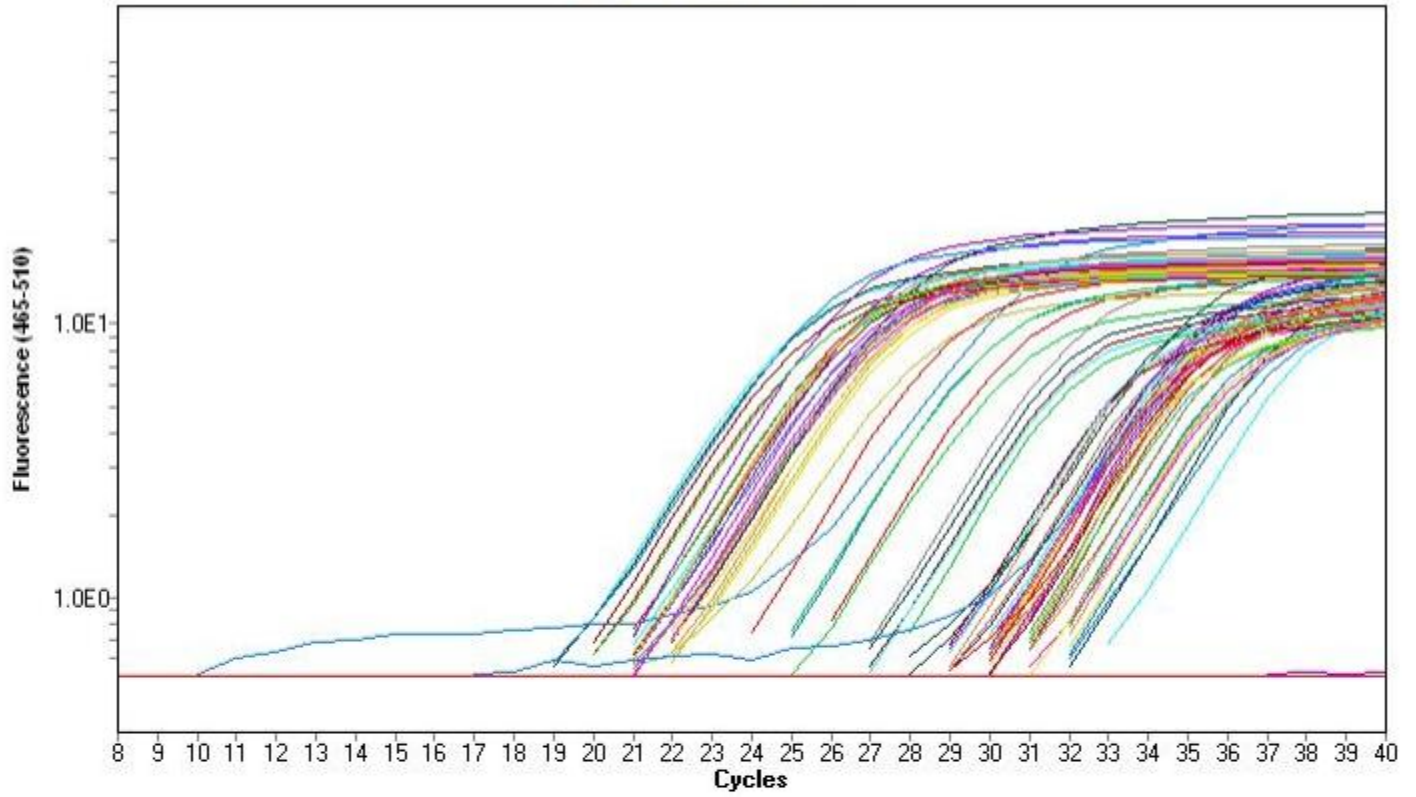

### Standard Curve

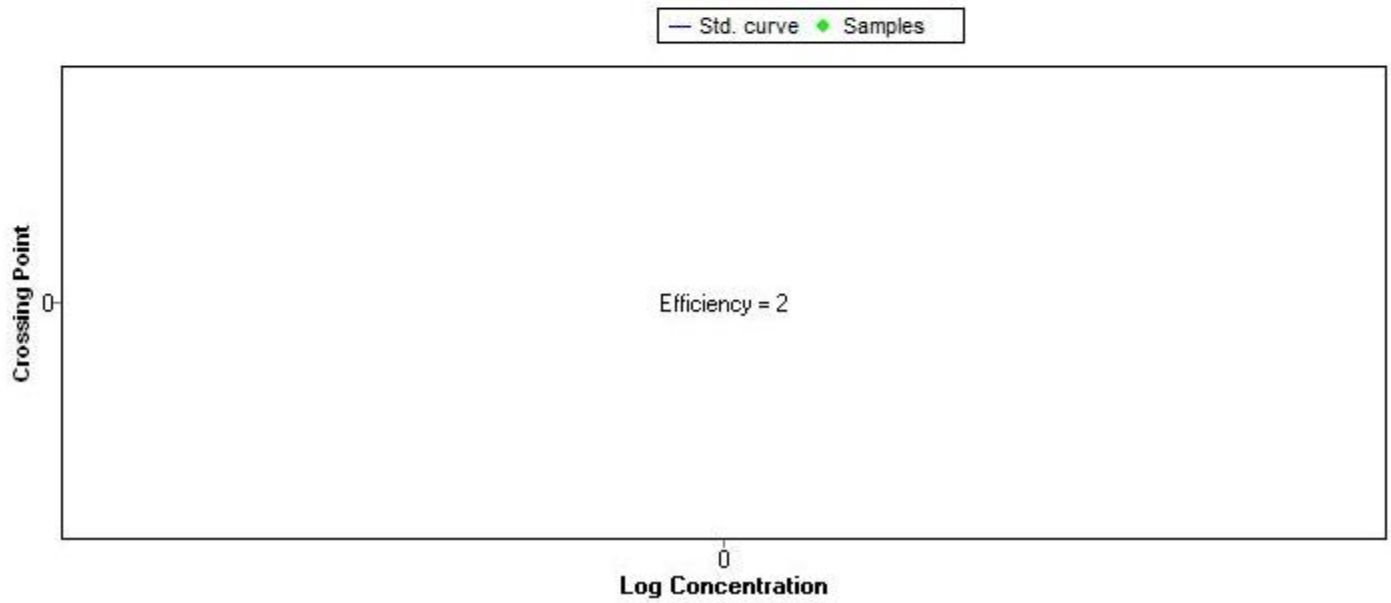

### Analysis Notes



### Melting Curves

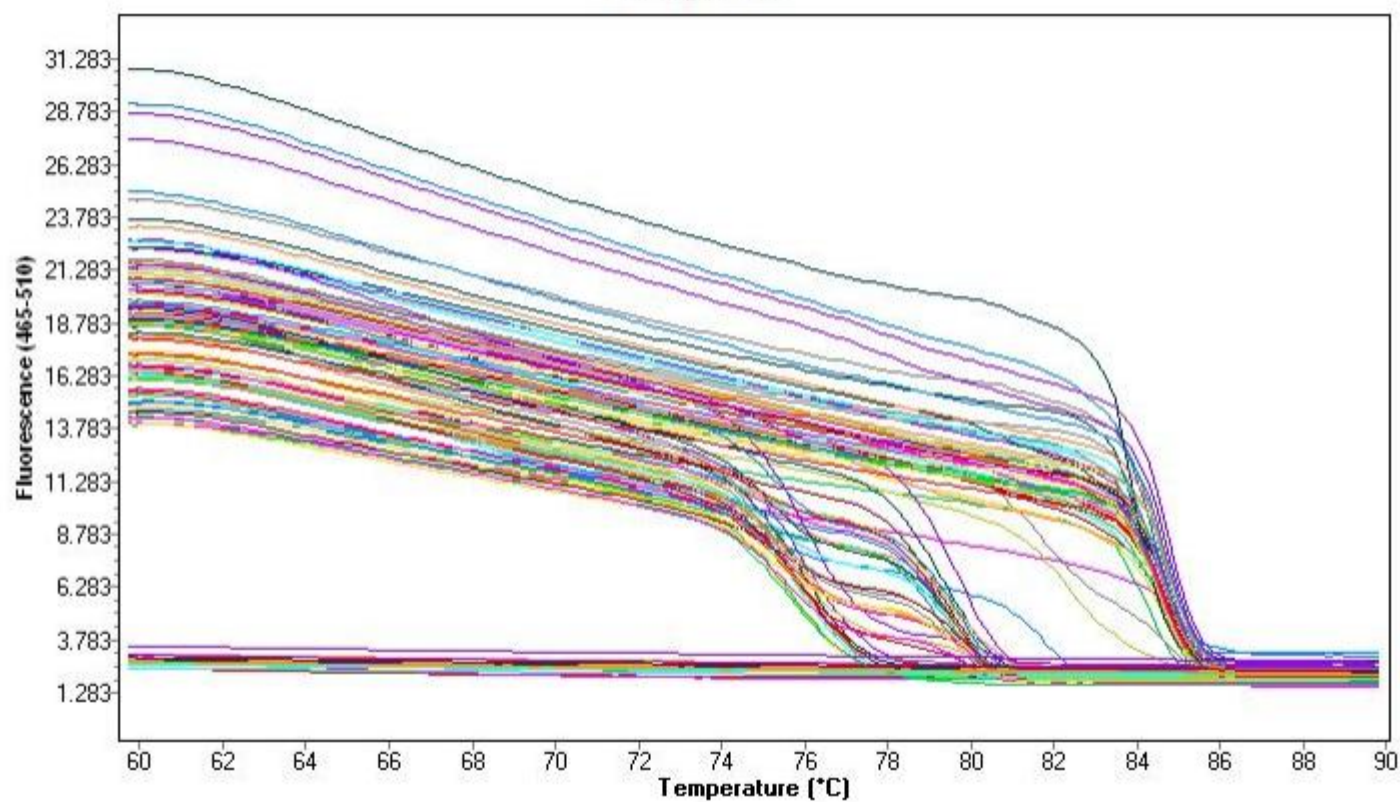

### Normalized Melting Curves

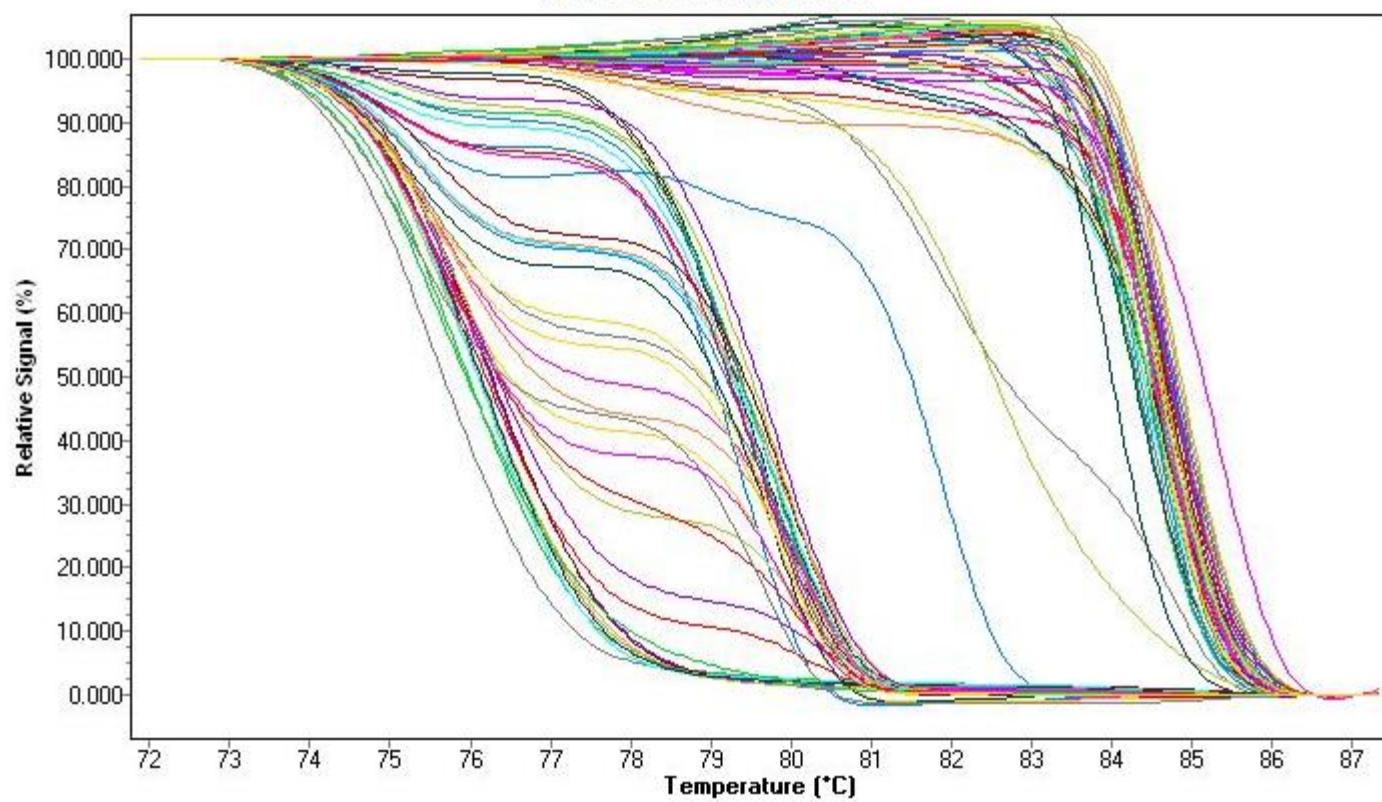

**Normalized and Shifted Melting Curves**

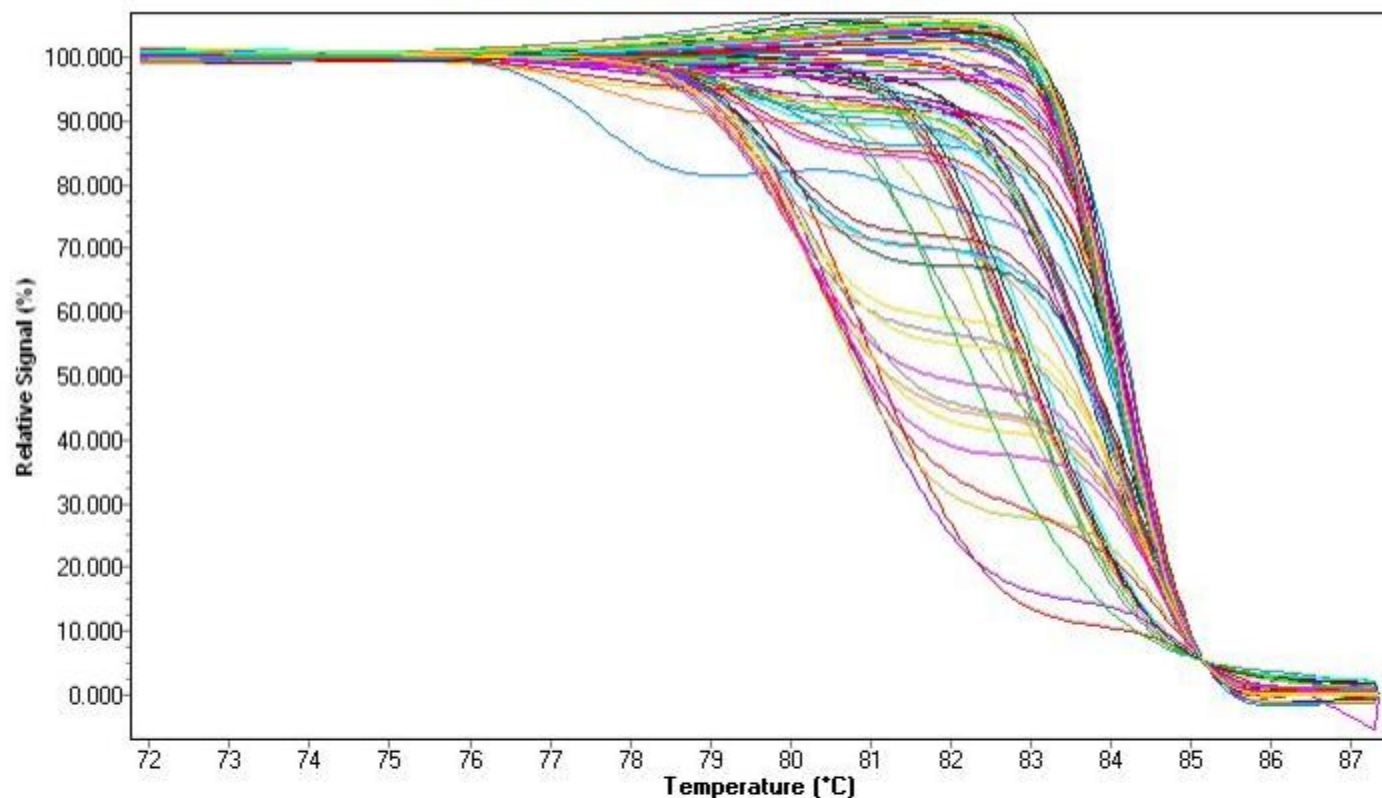

**Normalized and Temp-Shifted Difference Plot**

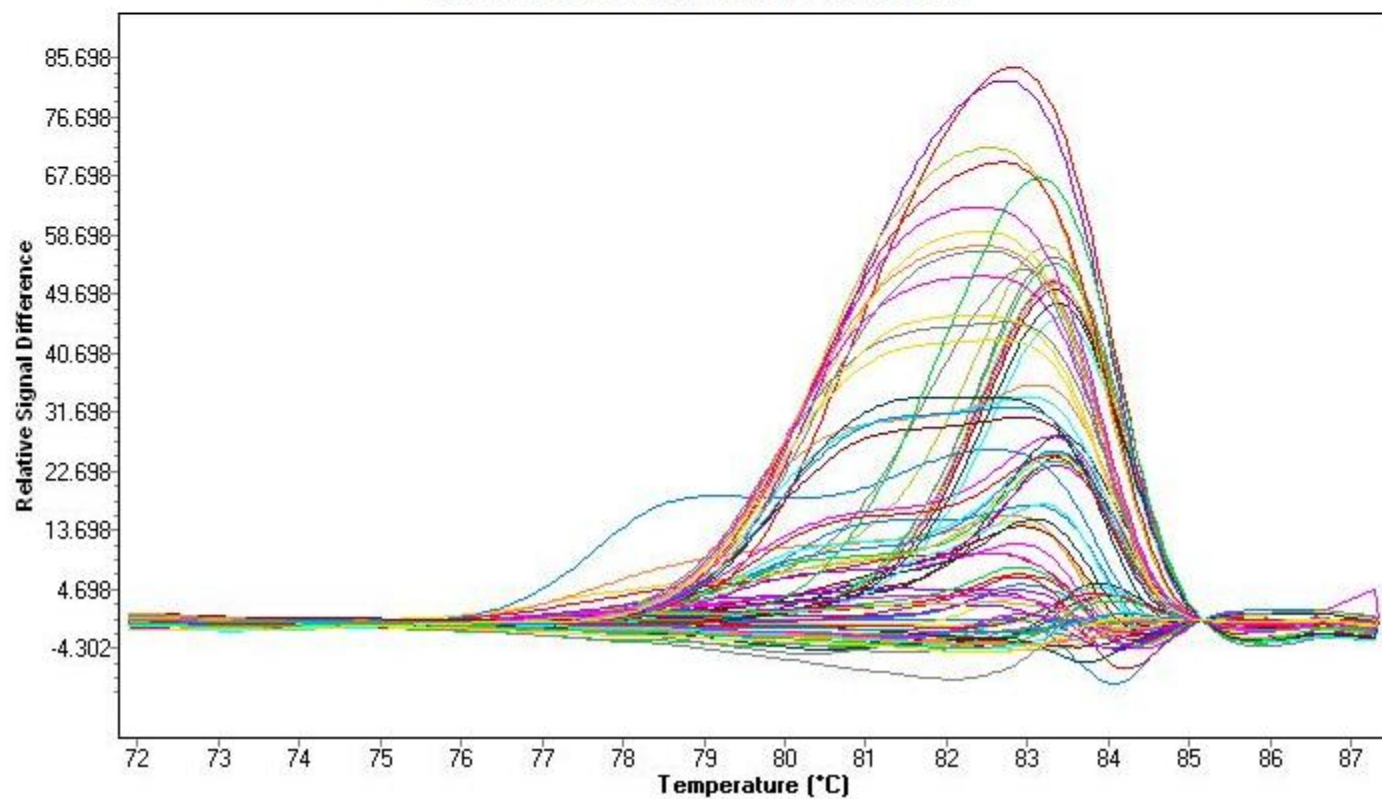

**Analysis Notes**

### Melting Curves

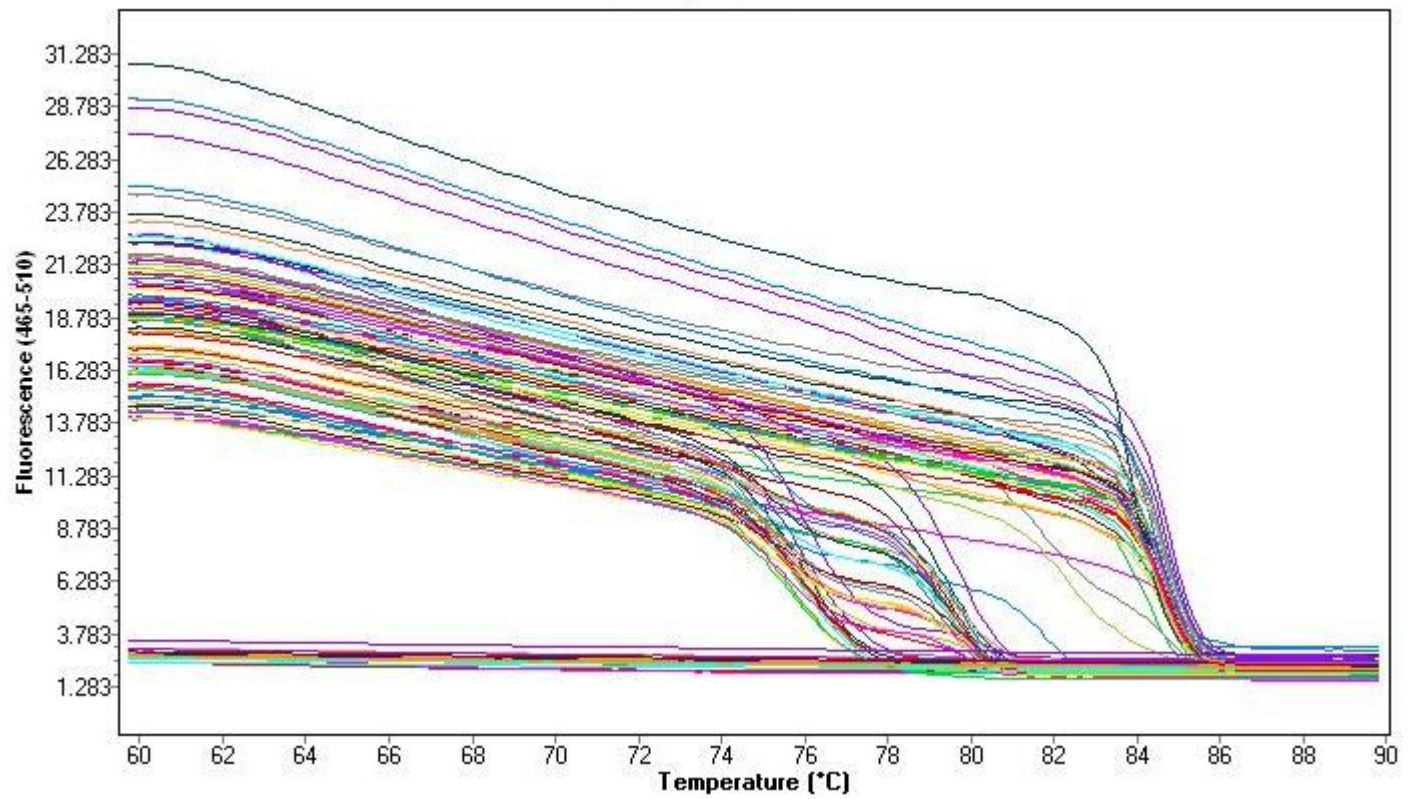



### Melting Peaks

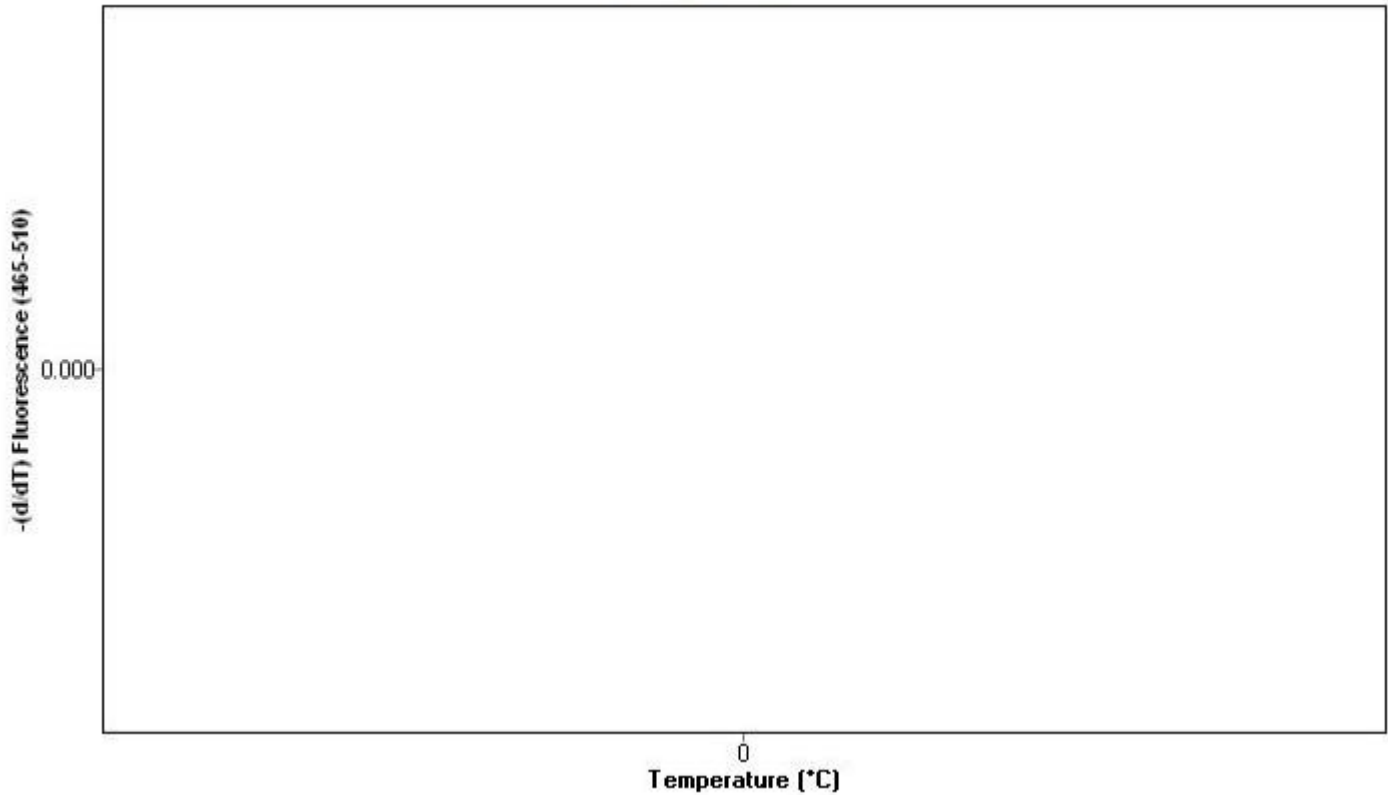

### Analysis Notes

### Melt Curve Genotyping for All Samples (1) (Melt Curve Genotyping)

|               |            |                    |       |
|---------------|------------|--------------------|-------|
| Channel       | 465-510    | Color Compensation | Off   |
| Program Name  | Program    |                    |       |
| Stds Settings | Auto-Group |                    |       |
| Sensitivity   | Normal     | Temp Range         | 62-85 |
| Score         | 0.7        | Res                | 0.1   |

|             |             |
|-------------|-------------|
| Subset Name | All Samples |
|-------------|-------------|

### Results

| Inc                                 | Pos. | Sample Name | Sample Type | Group | Score | Resolution | Status |
|-------------------------------------|------|-------------|-------------|-------|-------|------------|--------|
| <input checked="" type="checkbox"/> | A1   | GAPDH 1     | Unknown     | 1     | 0.99  | 0.58       |        |
| <input checked="" type="checkbox"/> | A2   | GAPDH 1     | Unknown     | 1     | 0.98  | 0.48       |        |
| <input checked="" type="checkbox"/> | A3   | GAPDH 1     | Unknown     | 1     | 0.97  | 0.64       |        |
| <input checked="" type="checkbox"/> | A4   | GAPDH 2     | Unknown     | 1     | 0.94  | 0.34       |        |
| <input checked="" type="checkbox"/> | A5   | GAPDH 2     | Unknown     | 1     | 0.71  | 0.15       |        |
| <input checked="" type="checkbox"/> | A6   | GAPDH 2     | Unknown     | 1     | 0.93  | 0.31       |        |
| <input checked="" type="checkbox"/> | A7   | GAPDH 3     | Unknown     | 1     | 0.98  | 0.64       |        |
| <input checked="" type="checkbox"/> | A8   | GAPDH 3     | Unknown     | 1     | 0.99  | 0.65       |        |
| <input checked="" type="checkbox"/> | A9   | GAPDH 3     | Unknown     | 1     | 0.92  | 0.70       |        |
| <input checked="" type="checkbox"/> | A10  | GAPDH 4     | Unknown     | 1     | 0.88  | 0.15       |        |

## Results

| Inc                                 | Pos. | Sample Name | Sample Type | Group    | Score | Resolution | Status |
|-------------------------------------|------|-------------|-------------|----------|-------|------------|--------|
| <input checked="" type="checkbox"/> | A11  | GAPDH 4     | Unknown     | 1        | 0.99  | 0.52       |        |
| <input checked="" type="checkbox"/> | A12  | GAPDH 4     | Unknown     | 1        | 0.85  | 0.31       |        |
| <input checked="" type="checkbox"/> | B1   | FCER1A 1    | Unknown     | 4        | 0.96  | 0.41       |        |
| <input checked="" type="checkbox"/> | B2   | FCER1A 1    | Unknown     | Negative | 1.00  | 1.00       |        |
| <input checked="" type="checkbox"/> | B3   | FCER1A 1    | Unknown     | 5        | 1.00  | 0.99       |        |
| <input checked="" type="checkbox"/> | B4   | FCER1A 2    | Unknown     | 5        | 0.74  | 0.74       |        |
| <input checked="" type="checkbox"/> | B5   | FCER1A 2    | Unknown     | 2        | 0.99  | 0.36       |        |
| <input checked="" type="checkbox"/> | B6   | FCER1A 2    | Unknown     | 2        | 0.99  | 0.36       |        |
| <input checked="" type="checkbox"/> | B7   | FCER1A 3    | Unknown     | 4        | 0.95  | 0.55       |        |
| <input checked="" type="checkbox"/> | B8   | FCER1A 3    | Unknown     | 4        | 0.98  | 0.43       |        |
| <input checked="" type="checkbox"/> | B9   | FCER1A 3    | Unknown     | 4        | 0.93  | 0.53       |        |
| <input checked="" type="checkbox"/> | B10  | FCER1A 4    | Unknown     | 2        | 0.98  | 0.36       |        |
| <input checked="" type="checkbox"/> | B11  | FCER1A 4    | Unknown     | 2        | 0.99  | 0.36       |        |
| <input checked="" type="checkbox"/> | B12  | FCER1A 4    | Unknown     | 2        | 0.99  | 0.49       |        |
| <input checked="" type="checkbox"/> | C1   | GAPDH 5     | Unknown     | 1        | 0.99  | 0.60       |        |
| <input checked="" type="checkbox"/> | C2   | GAPDH 5     | Unknown     | 1        | 0.95  | 0.31       |        |
| <input checked="" type="checkbox"/> | C3   | GAPDH 5     | Unknown     | 1        | 0.98  | 0.60       |        |
| <input checked="" type="checkbox"/> | C4   | GAPDH 7     | Unknown     | 1        | 0.96  | 0.36       |        |
| <input checked="" type="checkbox"/> | C5   | GAPDH 7     | Unknown     | 1        | 0.94  | 0.67       |        |
| <input checked="" type="checkbox"/> | C6   | GAPDH 7     | Unknown     | 1        | 0.99  | 0.56       |        |
| <input checked="" type="checkbox"/> | C7   | GAPDH 11    | Unknown     | 1        | 0.93  | 0.35       |        |
| <input checked="" type="checkbox"/> | C8   | GAPDH 11    | Unknown     | 1        | 0.93  | 0.40       |        |
| <input checked="" type="checkbox"/> | C9   | GAPDH 11    | Unknown     | 1        | 0.95  | 0.44       |        |
| <input checked="" type="checkbox"/> | C10  | GAPDH 14    | Unknown     | 1        | 0.99  | 0.64       |        |
| <input checked="" type="checkbox"/> | C11  | GAPDH 14    | Unknown     | 1        | 0.98  | 0.44       |        |
| <input checked="" type="checkbox"/> | C12  | GAPDH 14    | Unknown     | 1        | 0.98  | 0.62       |        |
| <input checked="" type="checkbox"/> | D1   | FCER1A 5    | Unknown     | 6        | 1.00  | 0.31       |        |
| <input checked="" type="checkbox"/> | D2   | FCER1A 5    | Unknown     | 2        | 0.98  | 0.39       |        |
| <input checked="" type="checkbox"/> | D3   | FCER1A 5    | Unknown     | 2        | 0.99  | 0.50       |        |
| <input checked="" type="checkbox"/> | D4   | FCER1A 7    | Unknown     | 4        | 0.94  | 0.32       |        |
| <input checked="" type="checkbox"/> | D5   | FCER1A 7    | Unknown     | 2        | 1.00  | 0.48       |        |
| <input checked="" type="checkbox"/> | D6   | FCER1A 7    | Unknown     | 3        | 0.91  | 0.23       |        |
| <input checked="" type="checkbox"/> | D7   | FCER1A 11   | Unknown     | 2        | 0.99  | 0.46       |        |
| <input checked="" type="checkbox"/> | D8   | FCER1A 11   | Unknown     | 2        | 0.98  | 0.49       |        |
| <input checked="" type="checkbox"/> | D9   | FCER1A 11   | Unknown     | 2        | 0.99  | 0.50       |        |
| <input checked="" type="checkbox"/> | D10  | FCER1A 14   | Unknown     | Unknown  | 0.89  | 0.08       |        |
| <input checked="" type="checkbox"/> | D11  | FCER1A 14   | Unknown     | 2        | 0.95  | 0.31       |        |
| <input checked="" type="checkbox"/> | D12  | FCER1A 14   | Unknown     | 2        | 0.87  | 0.11       |        |

## Results

| Inc                                 | Pos. | Sample Name | Sample Type | Group    | Score | Resolution | Status |
|-------------------------------------|------|-------------|-------------|----------|-------|------------|--------|
| <input checked="" type="checkbox"/> | E1   | GAPDH 15    | Unknown     | 1        | 0.99  | 0.62       |        |
| <input checked="" type="checkbox"/> | E2   | GAPDH 15    | Unknown     | 1        | 0.98  | 0.48       |        |
| <input checked="" type="checkbox"/> | E3   | GAPDH 15    | Unknown     | 1        | 0.99  | 0.51       |        |
| <input checked="" type="checkbox"/> | E4   | GAPDH 18    | Unknown     | 1        | 0.99  | 0.61       |        |
| <input checked="" type="checkbox"/> | E5   | GAPDH 18    | Unknown     | 1        | 0.95  | 0.69       |        |
| <input checked="" type="checkbox"/> | E6   | GAPDH 18    | Unknown     | 1        | 0.99  | 0.60       |        |
| <input checked="" type="checkbox"/> | E7   | GAPDH 19    | Unknown     | 1        | 0.99  | 0.59       |        |
| <input checked="" type="checkbox"/> | E8   | GAPDH 19    | Unknown     | 1        | 0.98  | 0.62       |        |
| <input checked="" type="checkbox"/> | E9   | GAPDH 19    | Unknown     | 1        | 0.90  | 0.71       |        |
| <input checked="" type="checkbox"/> | E10  | GAPDH 20    | Unknown     | 1        | 0.99  | 0.62       |        |
| <input checked="" type="checkbox"/> | E11  | GAPDH 20    | Unknown     | 1        | 0.99  | 0.52       |        |
| <input checked="" type="checkbox"/> | E12  | GAPDH 20    | Unknown     | 1        | 1.00  | 0.55       |        |
| <input checked="" type="checkbox"/> | F1   | FCER1A 15   | Unknown     | 4        | 0.99  | 0.50       |        |
| <input checked="" type="checkbox"/> | F2   | FCER1A 15   | Unknown     | Unknown  | 0.84  | 0.04       |        |
| <input checked="" type="checkbox"/> | F3   | FCER1A 15   | Unknown     | 4        | 1.00  | 0.51       |        |
| <input checked="" type="checkbox"/> | F4   | FCER1A 18   | Unknown     | 3        | 0.97  | 0.38       |        |
| <input checked="" type="checkbox"/> | F5   | FCER1A 18   | Unknown     | 3        | 0.99  | 0.30       |        |
| <input checked="" type="checkbox"/> | F6   | FCER1A 18   | Unknown     | 3        | 0.98  | 0.27       |        |
| <input checked="" type="checkbox"/> | F7   | FCER1A 19   | Unknown     | Unknown  | 0.91  | 0.09       |        |
| <input checked="" type="checkbox"/> | F8   | FCER1A 19   | Unknown     | 3        | 0.88  | 0.11       |        |
| <input checked="" type="checkbox"/> | F9   | FCER1A 19   | Unknown     | 3        | 0.95  | 0.16       |        |
| <input checked="" type="checkbox"/> | F10  | FCER1A 20   | Unknown     | 3        | 0.94  | 0.31       |        |
| <input checked="" type="checkbox"/> | F11  | FCER1A 20   | Unknown     | 4        | 0.99  | 0.53       |        |
| <input checked="" type="checkbox"/> | F12  | FCER1A 20   | Unknown     | 4        | 0.99  | 0.50       |        |
| <input checked="" type="checkbox"/> | G1   | GAPDH 24    | Unknown     | 1        | 0.98  | 0.65       |        |
| <input checked="" type="checkbox"/> | G2   | GAPDH 24    | Unknown     | 1        | 0.99  | 0.60       |        |
| <input checked="" type="checkbox"/> | G3   | GAPDH 24    | Unknown     | 1        | 0.97  | 0.66       |        |
| <input checked="" type="checkbox"/> | G4   | GAPDH 26    | Unknown     | 1        | 0.99  | 0.49       |        |
| <input checked="" type="checkbox"/> | G5   | GAPDH 26    | Unknown     | 1        | 0.89  | 0.72       |        |
| <input checked="" type="checkbox"/> | G6   | GAPDH 26    | Unknown     | 1        | 0.99  | 0.62       |        |
| <input checked="" type="checkbox"/> | G7   |             | Unknown     | Negative | 1.00  | 1.00       |        |
| <input checked="" type="checkbox"/> | G8   |             | Unknown     | Negative | 1.00  | 1.00       |        |
| <input checked="" type="checkbox"/> | G9   |             | Unknown     | Negative | 1.00  | 1.00       |        |
| <input checked="" type="checkbox"/> | G10  |             | Unknown     | Negative | 1.00  | 1.00       |        |
| <input checked="" type="checkbox"/> | G11  |             | Unknown     | Negative | 1.00  | 1.00       |        |
| <input checked="" type="checkbox"/> | G12  |             | Unknown     | Negative | 1.00  | 1.00       |        |
| <input checked="" type="checkbox"/> | H1   | FCER1A 24   | Unknown     | 3        | 0.88  | 0.12       |        |
| <input checked="" type="checkbox"/> | H2   | FCER1A 24   | Unknown     | 4        | 0.96  | 0.37       |        |

## Results

| Inc                                 | Pos. | Sample Name | Sample Type | Group    | Score | Resolution | Status |
|-------------------------------------|------|-------------|-------------|----------|-------|------------|--------|
| <input checked="" type="checkbox"/> | H3   | FCER1A 24   | Unknown     | 2        | 0.98  | 0.45       |        |
| <input checked="" type="checkbox"/> | H4   | FCER1A 26   | Unknown     | 3        | 0.87  | 0.13       |        |
| <input checked="" type="checkbox"/> | H5   | FCER1A 26   | Unknown     | 3        | 0.95  | 0.32       |        |
| <input checked="" type="checkbox"/> | H6   | FCER1A 26   | Unknown     | 3        | 1.00  | 0.31       |        |
| <input checked="" type="checkbox"/> | H7   |             | Unknown     | Negative | 1.00  | 1.00       |        |
| <input checked="" type="checkbox"/> | H8   |             | Unknown     | Negative | 1.00  | 1.00       |        |
| <input checked="" type="checkbox"/> | H9   |             | Unknown     | Negative | 1.00  | 1.00       |        |
| <input checked="" type="checkbox"/> | H10  |             | Unknown     | Negative | 1.00  | 1.00       |        |
| <input checked="" type="checkbox"/> | H11  |             | Unknown     | Negative | 1.00  | 1.00       |        |
| <input checked="" type="checkbox"/> | H12  |             | Unknown     | Negative | 1.00  | 1.00       |        |

## Group 1

| Inc                                 | Pos | Sample Name | Sample Type | Score | Resolution | Status |
|-------------------------------------|-----|-------------|-------------|-------|------------|--------|
| <input checked="" type="checkbox"/> | A1  | GAPDH 1     | Unknown     | 0.99  | 0.58       |        |
| <input checked="" type="checkbox"/> | A2  | GAPDH 1     | Unknown     | 0.98  | 0.48       |        |
| <input checked="" type="checkbox"/> | A3  | GAPDH 1     | Unknown     | 0.97  | 0.64       |        |
| <input checked="" type="checkbox"/> | A4  | GAPDH 2     | Unknown     | 0.94  | 0.34       |        |
| <input checked="" type="checkbox"/> | A5  | GAPDH 2     | Unknown     | 0.71  | 0.15       |        |
| <input checked="" type="checkbox"/> | A6  | GAPDH 2     | Unknown     | 0.93  | 0.31       |        |
| <input checked="" type="checkbox"/> | A7  | GAPDH 3     | Unknown     | 0.98  | 0.64       |        |
| <input checked="" type="checkbox"/> | A8  | GAPDH 3     | Unknown     | 0.99  | 0.65       |        |
| <input checked="" type="checkbox"/> | A9  | GAPDH 3     | Unknown     | 0.92  | 0.70       |        |
| <input checked="" type="checkbox"/> | A10 | GAPDH 4     | Unknown     | 0.88  | 0.15       |        |
| <input checked="" type="checkbox"/> | A11 | GAPDH 4     | Unknown     | 0.99  | 0.52       |        |
| <input checked="" type="checkbox"/> | A12 | GAPDH 4     | Unknown     | 0.85  | 0.31       |        |
| <input checked="" type="checkbox"/> | C1  | GAPDH 5     | Unknown     | 0.99  | 0.60       |        |
| <input checked="" type="checkbox"/> | C2  | GAPDH 5     | Unknown     | 0.95  | 0.31       |        |
| <input checked="" type="checkbox"/> | C3  | GAPDH 5     | Unknown     | 0.98  | 0.60       |        |
| <input checked="" type="checkbox"/> | C4  | GAPDH 7     | Unknown     | 0.96  | 0.36       |        |
| <input checked="" type="checkbox"/> | C5  | GAPDH 7     | Unknown     | 0.94  | 0.67       |        |
| <input checked="" type="checkbox"/> | C6  | GAPDH 7     | Unknown     | 0.99  | 0.56       |        |
| <input checked="" type="checkbox"/> | C7  | GAPDH 11    | Unknown     | 0.93  | 0.35       |        |
| <input checked="" type="checkbox"/> | C8  | GAPDH 11    | Unknown     | 0.93  | 0.40       |        |
| <input checked="" type="checkbox"/> | C9  | GAPDH 11    | Unknown     | 0.95  | 0.44       |        |
| <input checked="" type="checkbox"/> | C10 | GAPDH 14    | Unknown     | 0.99  | 0.64       |        |
| <input checked="" type="checkbox"/> | C11 | GAPDH 14    | Unknown     | 0.98  | 0.44       |        |
| <input checked="" type="checkbox"/> | C12 | GAPDH 14    | Unknown     | 0.98  | 0.62       |        |
| <input checked="" type="checkbox"/> | E1  | GAPDH 15    | Unknown     | 0.99  | 0.62       |        |

| Group 1                             |     |             |             |       |            |        |
|-------------------------------------|-----|-------------|-------------|-------|------------|--------|
| Inc                                 | Pos | Sample Name | Sample Type | Score | Resolution | Status |
| <input checked="" type="checkbox"/> | E2  | GAPDH 15    | Unknown     | 0.98  | 0.48       |        |
| <input checked="" type="checkbox"/> | E3  | GAPDH 15    | Unknown     | 0.99  | 0.51       |        |
| <input checked="" type="checkbox"/> | E4  | GAPDH 18    | Unknown     | 0.99  | 0.61       |        |
| <input checked="" type="checkbox"/> | E5  | GAPDH 18    | Unknown     | 0.95  | 0.69       |        |
| <input checked="" type="checkbox"/> | E6  | GAPDH 18    | Unknown     | 0.99  | 0.60       |        |
| <input checked="" type="checkbox"/> | E7  | GAPDH 19    | Unknown     | 0.99  | 0.59       |        |
| <input checked="" type="checkbox"/> | E8  | GAPDH 19    | Unknown     | 0.98  | 0.62       |        |
| <input checked="" type="checkbox"/> | E9  | GAPDH 19    | Unknown     | 0.90  | 0.71       |        |
| <input checked="" type="checkbox"/> | E10 | GAPDH 20    | Unknown     | 0.99  | 0.62       |        |
| <input checked="" type="checkbox"/> | E11 | GAPDH 20    | Unknown     | 0.99  | 0.52       |        |
| <input checked="" type="checkbox"/> | E12 | GAPDH 20    | Unknown     | 1.00  | 0.55       |        |
| <input checked="" type="checkbox"/> | G1  | GAPDH 24    | Unknown     | 0.98  | 0.65       |        |
| <input checked="" type="checkbox"/> | G2  | GAPDH 24    | Unknown     | 0.99  | 0.60       |        |
| <input checked="" type="checkbox"/> | G3  | GAPDH 24    | Unknown     | 0.97  | 0.66       |        |
| <input checked="" type="checkbox"/> | G4  | GAPDH 26    | Unknown     | 0.99  | 0.49       |        |
| <input checked="" type="checkbox"/> | G5  | GAPDH 26    | Unknown     | 0.89  | 0.72       |        |
| <input checked="" type="checkbox"/> | G6  | GAPDH 26    | Unknown     | 0.99  | 0.62       |        |

| Group 2                             |     |             |             |       |            |        |
|-------------------------------------|-----|-------------|-------------|-------|------------|--------|
| Inc                                 | Pos | Sample Name | Sample Type | Score | Resolution | Status |
| <input checked="" type="checkbox"/> | B5  | FCER1A 2    | Unknown     | 0.99  | 0.36       |        |
| <input checked="" type="checkbox"/> | B6  | FCER1A 2    | Unknown     | 0.99  | 0.36       |        |
| <input checked="" type="checkbox"/> | B10 | FCER1A 4    | Unknown     | 0.98  | 0.36       |        |
| <input checked="" type="checkbox"/> | B11 | FCER1A 4    | Unknown     | 0.99  | 0.36       |        |
| <input checked="" type="checkbox"/> | B12 | FCER1A 4    | Unknown     | 0.99  | 0.49       |        |
| <input checked="" type="checkbox"/> | D2  | FCER1A 5    | Unknown     | 0.98  | 0.39       |        |
| <input checked="" type="checkbox"/> | D3  | FCER1A 5    | Unknown     | 0.99  | 0.50       |        |
| <input checked="" type="checkbox"/> | D5  | FCER1A 7    | Unknown     | 1.00  | 0.48       |        |
| <input checked="" type="checkbox"/> | D7  | FCER1A 11   | Unknown     | 0.99  | 0.46       |        |
| <input checked="" type="checkbox"/> | D8  | FCER1A 11   | Unknown     | 0.98  | 0.49       |        |
| <input checked="" type="checkbox"/> | D9  | FCER1A 11   | Unknown     | 0.99  | 0.50       |        |
| <input checked="" type="checkbox"/> | D11 | FCER1A 14   | Unknown     | 0.95  | 0.31       |        |
| <input checked="" type="checkbox"/> | D12 | FCER1A 14   | Unknown     | 0.87  | 0.11       |        |
| <input checked="" type="checkbox"/> | H3  | FCER1A 24   | Unknown     | 0.98  | 0.45       |        |

| Group 3                             |     |             |             |       |            |        |
|-------------------------------------|-----|-------------|-------------|-------|------------|--------|
| Inc                                 | Pos | Sample Name | Sample Type | Score | Resolution | Status |
| <input checked="" type="checkbox"/> | D6  | FCER1A 7    | Unknown     | 0.91  | 0.23       |        |

| Group                               |     | 3           |             |       |            |        |
|-------------------------------------|-----|-------------|-------------|-------|------------|--------|
| Inc                                 | Pos | Sample Name | Sample Type | Score | Resolution | Status |
| <input checked="" type="checkbox"/> | F4  | FCER1A 18   | Unknown     | 0.97  | 0.38       |        |
| <input checked="" type="checkbox"/> | F5  | FCER1A 18   | Unknown     | 0.99  | 0.30       |        |
| <input checked="" type="checkbox"/> | F6  | FCER1A 18   | Unknown     | 0.98  | 0.27       |        |
| <input checked="" type="checkbox"/> | F8  | FCER1A 19   | Unknown     | 0.88  | 0.11       |        |
| <input checked="" type="checkbox"/> | F9  | FCER1A 19   | Unknown     | 0.95  | 0.16       |        |
| <input checked="" type="checkbox"/> | F10 | FCER1A 20   | Unknown     | 0.94  | 0.31       |        |
| <input checked="" type="checkbox"/> | H1  | FCER1A 24   | Unknown     | 0.88  | 0.12       |        |
| <input checked="" type="checkbox"/> | H4  | FCER1A 26   | Unknown     | 0.87  | 0.13       |        |
| <input checked="" type="checkbox"/> | H5  | FCER1A 26   | Unknown     | 0.95  | 0.32       |        |
| <input checked="" type="checkbox"/> | H6  | FCER1A 26   | Unknown     | 1.00  | 0.31       |        |

| Group                               |     | 4           |             |       |            |        |
|-------------------------------------|-----|-------------|-------------|-------|------------|--------|
| Inc                                 | Pos | Sample Name | Sample Type | Score | Resolution | Status |
| <input checked="" type="checkbox"/> | B1  | FCER1A 1    | Unknown     | 0.96  | 0.41       |        |
| <input checked="" type="checkbox"/> | B7  | FCER1A 3    | Unknown     | 0.95  | 0.55       |        |
| <input checked="" type="checkbox"/> | B8  | FCER1A 3    | Unknown     | 0.98  | 0.43       |        |
| <input checked="" type="checkbox"/> | B9  | FCER1A 3    | Unknown     | 0.93  | 0.53       |        |
| <input checked="" type="checkbox"/> | D4  | FCER1A 7    | Unknown     | 0.94  | 0.32       |        |
| <input checked="" type="checkbox"/> | F1  | FCER1A 15   | Unknown     | 0.99  | 0.50       |        |
| <input checked="" type="checkbox"/> | F3  | FCER1A 15   | Unknown     | 1.00  | 0.51       |        |
| <input checked="" type="checkbox"/> | F11 | FCER1A 20   | Unknown     | 0.99  | 0.53       |        |
| <input checked="" type="checkbox"/> | F12 | FCER1A 20   | Unknown     | 0.99  | 0.50       |        |
| <input checked="" type="checkbox"/> | H2  | FCER1A 24   | Unknown     | 0.96  | 0.37       |        |

| Group                               |     | 5           |             |       |            |        |
|-------------------------------------|-----|-------------|-------------|-------|------------|--------|
| Inc                                 | Pos | Sample Name | Sample Type | Score | Resolution | Status |
| <input checked="" type="checkbox"/> | B3  | FCER1A 1    | Unknown     | 1.00  | 0.99       |        |
| <input checked="" type="checkbox"/> | B4  | FCER1A 2    | Unknown     | 0.74  | 0.74       |        |

| Group                               |     | 6           |             |       |            |        |
|-------------------------------------|-----|-------------|-------------|-------|------------|--------|
| Inc                                 | Pos | Sample Name | Sample Type | Score | Resolution | Status |
| <input checked="" type="checkbox"/> | D1  | FCER1A 5    | Unknown     | 1.00  | 0.31       |        |

| Group                               |     | Negative    |             |       |            |        |
|-------------------------------------|-----|-------------|-------------|-------|------------|--------|
| Inc                                 | Pos | Sample Name | Sample Type | Score | Resolution | Status |
| <input checked="" type="checkbox"/> | B2  | FCER1A 1    | Unknown     | 1.00  | 1.00       |        |
| <input checked="" type="checkbox"/> | G7  |             | Unknown     | 1.00  | 1.00       |        |

| Group Negative                      |     |             |             |       |            |        |
|-------------------------------------|-----|-------------|-------------|-------|------------|--------|
| Inc                                 | Pos | Sample Name | Sample Type | Score | Resolution | Status |
| <input checked="" type="checkbox"/> | G8  |             | Unknown     | 1.00  | 1.00       |        |
| <input checked="" type="checkbox"/> | G9  |             | Unknown     | 1.00  | 1.00       |        |
| <input checked="" type="checkbox"/> | G10 |             | Unknown     | 1.00  | 1.00       |        |
| <input checked="" type="checkbox"/> | G11 |             | Unknown     | 1.00  | 1.00       |        |
| <input checked="" type="checkbox"/> | G12 |             | Unknown     | 1.00  | 1.00       |        |
| <input checked="" type="checkbox"/> | H7  |             | Unknown     | 1.00  | 1.00       |        |
| <input checked="" type="checkbox"/> | H8  |             | Unknown     | 1.00  | 1.00       |        |
| <input checked="" type="checkbox"/> | H9  |             | Unknown     | 1.00  | 1.00       |        |
| <input checked="" type="checkbox"/> | H10 |             | Unknown     | 1.00  | 1.00       |        |
| <input checked="" type="checkbox"/> | H11 |             | Unknown     | 1.00  | 1.00       |        |
| <input checked="" type="checkbox"/> | H12 |             | Unknown     | 1.00  | 1.00       |        |

| Group Unknown                       |     |             |             |       |            |        |
|-------------------------------------|-----|-------------|-------------|-------|------------|--------|
| Inc                                 | Pos | Sample Name | Sample Type | Score | Resolution | Status |
| <input checked="" type="checkbox"/> | D10 | FCER1A 14   | Unknown     | 0.89  | 0.08       |        |
| <input checked="" type="checkbox"/> | F2  | FCER1A 15   | Unknown     | 0.84  | 0.04       |        |
| <input checked="" type="checkbox"/> | F7  | FCER1A 19   | Unknown     | 0.91  | 0.09       |        |

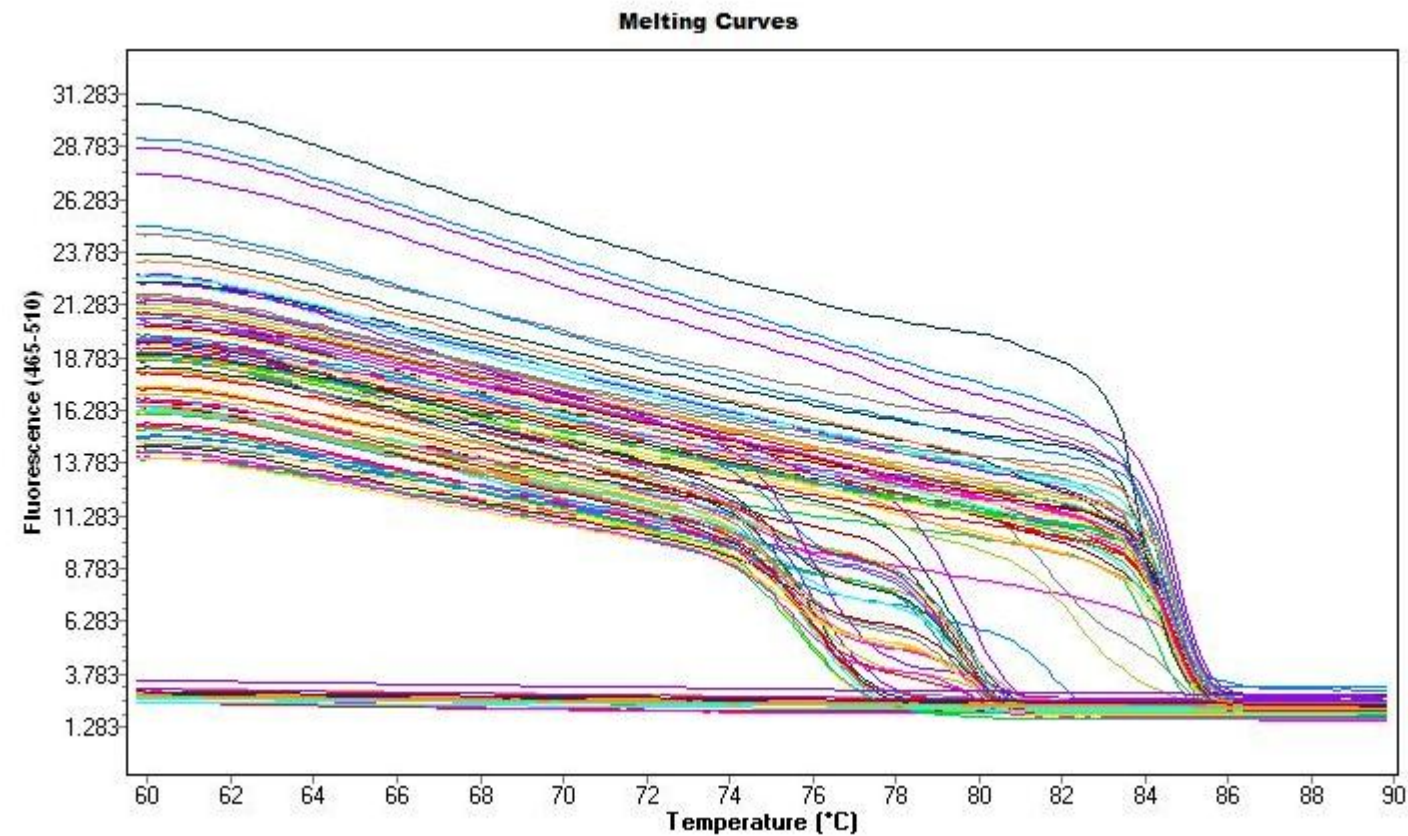

### Melting Peaks

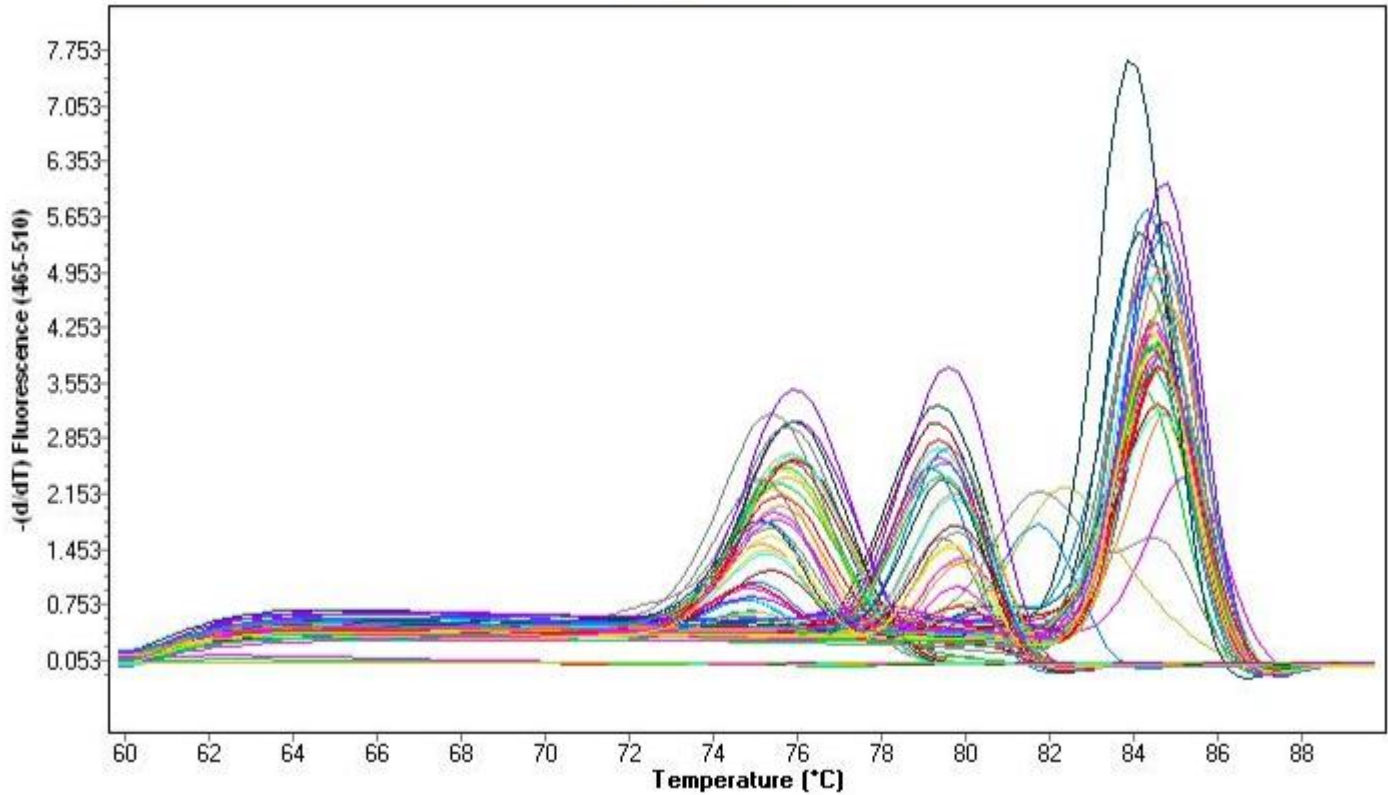

### Analysis Notes

### Tm Calling for All Samples (Tm Calling)

#### Settings

|                |             |                    |          |
|----------------|-------------|--------------------|----------|
| Channel        | 465-510     | Color Compensation | Off      |
| Program        | Program     |                    |          |
| Show Shoulders | False       | Chemistry          | HybProbe |
|                |             | Max Peaks          | 2        |
| Subset Name    | All Samples |                    |          |

#### Results

| Inc                                 | Pos | Sample Name | Peak 1 |       |       |        | Peak 2 |      |       |        | Status |
|-------------------------------------|-----|-------------|--------|-------|-------|--------|--------|------|-------|--------|--------|
|                                     |     |             | Tm     | Area  | Width | Height | Tm     | Area | Width | Height |        |
| <input checked="" type="checkbox"/> | A1  | GAPDH 1     | 84.36  | 13.00 | 2.21  | 5.89   |        |      |       |        |        |
| <input checked="" type="checkbox"/> | A2  | GAPDH 1     | 84.61  | 8.97  | 2.26  | 3.97   |        |      |       |        |        |
| <input checked="" type="checkbox"/> | A3  | GAPDH 1     | 84.26  | 8.48  | 2.34  | 3.62   |        |      |       |        |        |
| <input checked="" type="checkbox"/> | A4  | GAPDH 2     | 85.30  | 6.15  | 2.41  | 2.56   |        |      |       |        |        |
| <input checked="" type="checkbox"/> | A5  | GAPDH 2     | 83.06  | 11.43 | 5.44  | 2.10   |        |      |       |        |        |
| <input checked="" type="checkbox"/> | A6  | GAPDH 2     | 84.58  | 8.01  | 2.32  | 3.45   |        |      |       |        |        |
| <input checked="" type="checkbox"/> | A7  | GAPDH 3     | 84.57  | 10.14 | 2.23  | 4.54   |        |      |       |        |        |
| <input checked="" type="checkbox"/> | A8  | GAPDH 3     | 84.39  | 11.36 | 2.27  | 5.00   |        |      |       |        |        |
| <input checked="" type="checkbox"/> | A9  | GAPDH 3     | 84.27  | 12.98 | 2.30  | 5.65   |        |      |       |        |        |



## Results

| Inc                                 | Pos | Sample Name | Peak 1 |       |       |        | Peak 2 |      |       |        | Status |
|-------------------------------------|-----|-------------|--------|-------|-------|--------|--------|------|-------|--------|--------|
|                                     |     |             | Tm     | Area  | Width | Height | Tm     | Area | Width | Height |        |
| <input checked="" type="checkbox"/> | A10 | GAPDH 4     | 78.27  | 1.03  | 2.53  | 0.41   | 84.84  | 7.90 | 2.34  | 3.37   |        |
| <input checked="" type="checkbox"/> | A11 | GAPDH 4     | 84.68  | 10.23 | 2.19  | 4.66   |        |      |       |        |        |
| <input checked="" type="checkbox"/> | A12 | GAPDH 4     | 82.65  | 8.00  | 3.63  | 2.20   |        |      |       |        |        |
| <input checked="" type="checkbox"/> | B1  | FCER1A 1    | 74.61  | 1.26  | 2.25  | 0.56   | 79.20  | 6.23 | 2.39  | 2.61   |        |
| <input checked="" type="checkbox"/> | B2  | FCER1A 1    |        |       |       |        |        |      |       |        |        |
| <input checked="" type="checkbox"/> | B3  | FCER1A 1    | 66.28  | 0.41  | 8.02  | 0.05   |        |      |       |        |        |
| <input checked="" type="checkbox"/> | B4  | FCER1A 2    |        |       |       |        |        |      |       |        |        |
| <input checked="" type="checkbox"/> | B5  | FCER1A 2    | 75.89  | 9.71  | 3.19  | 3.04   |        |      |       |        |        |
| <input checked="" type="checkbox"/> | B6  | FCER1A 2    | 75.81  | 7.78  | 3.12  | 2.49   |        |      |       |        |        |
| <input checked="" type="checkbox"/> | B7  | FCER1A 3    | 79.35  | 8.56  | 2.69  | 3.18   |        |      |       |        |        |
| <input checked="" type="checkbox"/> | B8  | FCER1A 3    | 74.61  | 1.06  | 2.03  | 0.52   | 79.40  | 7.56 | 2.65  | 2.86   |        |
| <input checked="" type="checkbox"/> | B9  | FCER1A 3    | 79.39  | 9.45  | 2.77  | 3.41   |        |      |       |        |        |
| <input checked="" type="checkbox"/> | B10 | FCER1A 4    | 76.10  | 7.97  | 3.01  | 2.65   |        |      |       |        |        |
| <input checked="" type="checkbox"/> | B11 | FCER1A 4    | 76.17  | 10.02 | 3.20  | 3.13   |        |      |       |        |        |
| <input checked="" type="checkbox"/> | B12 | FCER1A 4    | 76.01  | 8.75  | 3.24  | 2.70   |        |      |       |        |        |
| <input checked="" type="checkbox"/> | C1  | GAPDH 5     | 84.81  | 9.17  | 2.19  | 4.18   |        |      |       |        |        |
| <input checked="" type="checkbox"/> | C2  | GAPDH 5     | 84.72  | 8.58  | 2.18  | 3.93   |        |      |       |        |        |
| <input checked="" type="checkbox"/> | C3  | GAPDH 5     | 84.62  | 9.53  | 2.26  | 4.22   |        |      |       |        |        |
| <input checked="" type="checkbox"/> | C4  | GAPDH 7     | 84.66  | 8.80  | 2.14  | 4.10   |        |      |       |        |        |
| <input checked="" type="checkbox"/> | C5  | GAPDH 7     | 84.54  | 13.61 | 2.29  | 5.95   |        |      |       |        |        |
| <input checked="" type="checkbox"/> | C6  | GAPDH 7     | 84.60  | 9.01  | 2.09  | 4.31   |        |      |       |        |        |
| <input checked="" type="checkbox"/> | C7  | GAPDH 11    | 84.58  | 8.79  | 2.49  | 3.52   |        |      |       |        |        |
| <input checked="" type="checkbox"/> | C8  | GAPDH 11    | 84.66  | 10.21 | 3.10  | 3.29   |        |      |       |        |        |
| <input checked="" type="checkbox"/> | C9  | GAPDH 11    | 84.57  | 11.36 | 2.67  | 4.25   |        |      |       |        |        |
| <input checked="" type="checkbox"/> | C10 | GAPDH 14    | 84.80  | 10.53 | 2.23  | 4.73   |        |      |       |        |        |
| <input checked="" type="checkbox"/> | C11 | GAPDH 14    | 84.78  | 11.80 | 2.02  | 5.83   |        |      |       |        |        |
| <input checked="" type="checkbox"/> | C12 | GAPDH 14    | 84.85  | 10.43 | 2.18  | 4.78   |        |      |       |        |        |
| <input checked="" type="checkbox"/> | D1  | FCER1A 5    | 75.06  | 1.71  | 2.21  | 0.77   | 81.70  | 5.12 | 2.83  | 1.81   |        |
| <input checked="" type="checkbox"/> | D2  | FCER1A 5    | 75.99  | 8.46  | 3.33  | 2.54   |        |      |       |        |        |
| <input checked="" type="checkbox"/> | D3  | FCER1A 5    | 75.85  | 8.16  | 3.20  | 2.55   |        |      |       |        |        |
| <input checked="" type="checkbox"/> | D4  | FCER1A 7    | 74.80  | 1.40  | 2.08  | 0.68   | 79.43  | 7.10 | 2.61  | 2.72   |        |
| <input checked="" type="checkbox"/> | D5  | FCER1A 7    | 75.54  | 10.20 | 3.17  | 3.21   |        |      |       |        |        |
| <input checked="" type="checkbox"/> | D6  | FCER1A 7    | 75.50  | 5.84  | 2.59  | 2.25   | 79.83  | 3.46 | 2.37  | 1.46   |        |
| <input checked="" type="checkbox"/> | D7  | FCER1A 11   | 76.14  | 8.45  | 3.22  | 2.62   |        |      |       |        |        |
| <input checked="" type="checkbox"/> | D8  | FCER1A 11   | 76.05  | 8.11  | 2.97  | 2.73   |        |      |       |        |        |
| <input checked="" type="checkbox"/> | D9  | FCER1A 11   | 76.06  | 9.50  | 3.03  | 3.14   |        |      |       |        |        |

## Results

| Inc                                 | Pos | Sample Name | Peak 1 |       |       |        | Peak 2 |      |       |        | Status |
|-------------------------------------|-----|-------------|--------|-------|-------|--------|--------|------|-------|--------|--------|
|                                     |     |             | Tm     | Area  | Width | Height | Tm     | Area | Width | Height |        |
| <input checked="" type="checkbox"/> | D10 | FCER1A 14   | 75.19  | 2.52  | 1.99  | 1.27   | 79.84  | 5.98 | 2.68  | 2.23   |        |
| <input checked="" type="checkbox"/> | D11 | FCER1A 14   | 75.99  | 11.84 | 3.49  | 3.39   |        |      |       |        |        |
| <input checked="" type="checkbox"/> | D12 | FCER1A 14   | 75.83  | 6.96  | 2.90  | 2.40   | 80.17  | 1.96 | 2.26  | 0.87   |        |
| <input checked="" type="checkbox"/> | E1  | GAPDH 15    | 84.45  | 8.67  | 2.08  | 4.16   |        |      |       |        |        |
| <input checked="" type="checkbox"/> | E2  | GAPDH 15    | 84.57  | 9.39  | 2.26  | 4.16   |        |      |       |        |        |
| <input checked="" type="checkbox"/> | E3  | GAPDH 15    | 84.50  | 8.81  | 2.26  | 3.89   |        |      |       |        |        |
| <input checked="" type="checkbox"/> | E4  | GAPDH 18    | 84.56  | 10.07 | 2.28  | 4.41   |        |      |       |        |        |
| <input checked="" type="checkbox"/> | E5  | GAPDH 18    | 84.30  | 11.72 | 2.35  | 4.99   |        |      |       |        |        |
| <input checked="" type="checkbox"/> | E6  | GAPDH 18    | 84.49  | 9.51  | 2.17  | 4.38   |        |      |       |        |        |
| <input checked="" type="checkbox"/> | E7  | GAPDH 19    | 84.66  | 10.08 | 2.18  | 4.62   |        |      |       |        |        |
| <input checked="" type="checkbox"/> | E8  | GAPDH 19    | 84.55  | 11.31 | 2.27  | 4.99   |        |      |       |        |        |
| <input checked="" type="checkbox"/> | E9  | GAPDH 19    | 83.98  | 17.44 | 2.21  | 7.90   |        |      |       |        |        |
| <input checked="" type="checkbox"/> | E10 | GAPDH 20    | 84.76  | 11.44 | 2.18  | 5.25   |        |      |       |        |        |
| <input checked="" type="checkbox"/> | E11 | GAPDH 20    | 84.81  | 12.68 | 2.01  | 6.32   |        |      |       |        |        |
| <input checked="" type="checkbox"/> | E12 | GAPDH 20    | 84.69  | 9.60  | 2.08  | 4.61   |        |      |       |        |        |
| <input checked="" type="checkbox"/> | F1  | FCER1A 15   | 74.66  | 0.89  | 2.26  | 0.39   | 79.49  | 7.13 | 2.69  | 2.65   |        |
| <input checked="" type="checkbox"/> | F2  | FCER1A 15   | 75.73  | 6.26  | 2.90  | 2.16   | 79.93  | 2.14 | 2.66  | 0.80   |        |
| <input checked="" type="checkbox"/> | F3  | FCER1A 15   | 74.53  | 0.71  | 2.01  | 0.35   | 79.36  | 6.58 | 2.65  | 2.48   |        |
| <input checked="" type="checkbox"/> | F4  | FCER1A 18   | 75.55  | 4.84  | 2.59  | 1.87   | 79.96  | 3.85 | 2.46  | 1.56   |        |
| <input checked="" type="checkbox"/> | F5  | FCER1A 18   | 75.41  | 3.77  | 2.35  | 1.61   | 79.86  | 4.50 | 2.52  | 1.79   |        |
| <input checked="" type="checkbox"/> | F6  | FCER1A 18   | 75.28  | 3.09  | 2.38  | 1.30   | 79.75  | 3.88 | 2.53  | 1.53   |        |
| <input checked="" type="checkbox"/> | F7  | FCER1A 19   | 75.34  | 2.32  | 2.44  | 0.95   | 79.82  | 4.64 | 2.53  | 1.83   |        |
| <input checked="" type="checkbox"/> | F8  | FCER1A 19   | 75.25  | 2.59  | 2.20  | 1.18   | 79.77  | 5.62 | 2.56  | 2.20   |        |
| <input checked="" type="checkbox"/> | F9  | FCER1A 19   | 75.10  | 3.57  | 2.30  | 1.55   | 79.55  | 5.95 | 2.45  | 2.43   |        |
| <input checked="" type="checkbox"/> | F10 | FCER1A 20   | 75.67  | 5.23  | 2.55  | 2.05   | 80.04  | 3.60 | 2.43  | 1.48   |        |
| <input checked="" type="checkbox"/> | F11 | FCER1A 20   | 79.64  | 10.37 | 2.65  | 3.91   |        |      |       |        |        |
| <input checked="" type="checkbox"/> | F12 | FCER1A 20   | 74.82  | 0.59  | 1.73  | 0.34   | 79.60  | 7.60 | 2.68  | 2.83   |        |
| <input checked="" type="checkbox"/> | G1  | GAPDH 24    | 84.74  | 12.37 | 2.22  | 5.57   |        |      |       |        |        |
| <input checked="" type="checkbox"/> | G2  | GAPDH 24    | 84.74  | 8.01  | 2.10  | 3.81   |        |      |       |        |        |
| <input checked="" type="checkbox"/> | G3  | GAPDH 24    | 84.58  | 9.63  | 2.27  | 4.24   |        |      |       |        |        |
| <input checked="" type="checkbox"/> | G4  | GAPDH 26    | 84.58  | 9.26  | 2.06  | 4.51   |        |      |       |        |        |
| <input checked="" type="checkbox"/> | G5  | GAPDH 26    | 84.45  | 12.08 | 2.27  | 5.33   |        |      |       |        |        |
| <input checked="" type="checkbox"/> | G6  | GAPDH 26    | 84.57  | 9.25  | 2.22  | 4.17   |        |      |       |        |        |
| <input checked="" type="checkbox"/> | G7  |             |        |       |       |        |        |      |       |        |        |
| <input checked="" type="checkbox"/> | G8  |             |        |       |       |        |        |      |       |        |        |
| <input checked="" type="checkbox"/> | G9  |             |        |       |       |        |        |      |       |        |        |

Results

| Inc                                 | Pos | Sample Name | Peak 1 |      |       |        | Peak 2 |      |       |        | Status |
|-------------------------------------|-----|-------------|--------|------|-------|--------|--------|------|-------|--------|--------|
|                                     |     |             | Tm     | Area | Width | Height | Tm     | Area | Width | Height |        |
| <input checked="" type="checkbox"/> | G10 |             |        |      |       |        |        |      |       |        |        |
| <input checked="" type="checkbox"/> | G11 |             |        |      |       |        |        |      |       |        |        |
| <input checked="" type="checkbox"/> | G12 |             |        |      |       |        |        |      |       |        |        |
| <input checked="" type="checkbox"/> | H1  | FCER1A 24   | 75.18  | 3.30 | 2.18  | 1.51   | 79.64  | 6.98 | 2.44  | 2.86   |        |
| <input checked="" type="checkbox"/> | H2  | FCER1A 24   | 74.79  | 1.42 | 2.02  | 0.70   | 79.41  | 7.53 | 2.55  | 2.95   |        |
| <input checked="" type="checkbox"/> | H3  | FCER1A 24   | 75.84  | 7.85 | 3.42  | 2.29   |        |      |       |        |        |
| <input checked="" type="checkbox"/> | H4  | FCER1A 26   | 75.55  | 5.21 | 2.67  | 1.95   | 79.89  | 2.36 | 2.25  | 1.10   |        |
| <input checked="" type="checkbox"/> | H5  | FCER1A 26   | 75.23  | 6.06 | 2.52  | 2.40   | 79.51  | 4.36 | 2.40  | 1.82   |        |
| <input checked="" type="checkbox"/> | H6  | FCER1A 26   | 75.36  | 3.57 | 2.29  | 1.56   | 79.74  | 4.05 | 2.44  | 1.66   |        |
| <input checked="" type="checkbox"/> | H7  |             |        |      |       |        |        |      |       |        |        |
| <input checked="" type="checkbox"/> | H8  |             |        |      |       |        |        |      |       |        |        |
| <input checked="" type="checkbox"/> | H9  |             |        |      |       |        |        |      |       |        |        |
| <input checked="" type="checkbox"/> | H10 |             |        |      |       |        |        |      |       |        |        |
| <input checked="" type="checkbox"/> | H11 |             |        |      |       |        |        |      |       |        |        |
| <input checked="" type="checkbox"/> | H12 |             |        |      |       |        |        |      |       |        |        |

Melting Curves

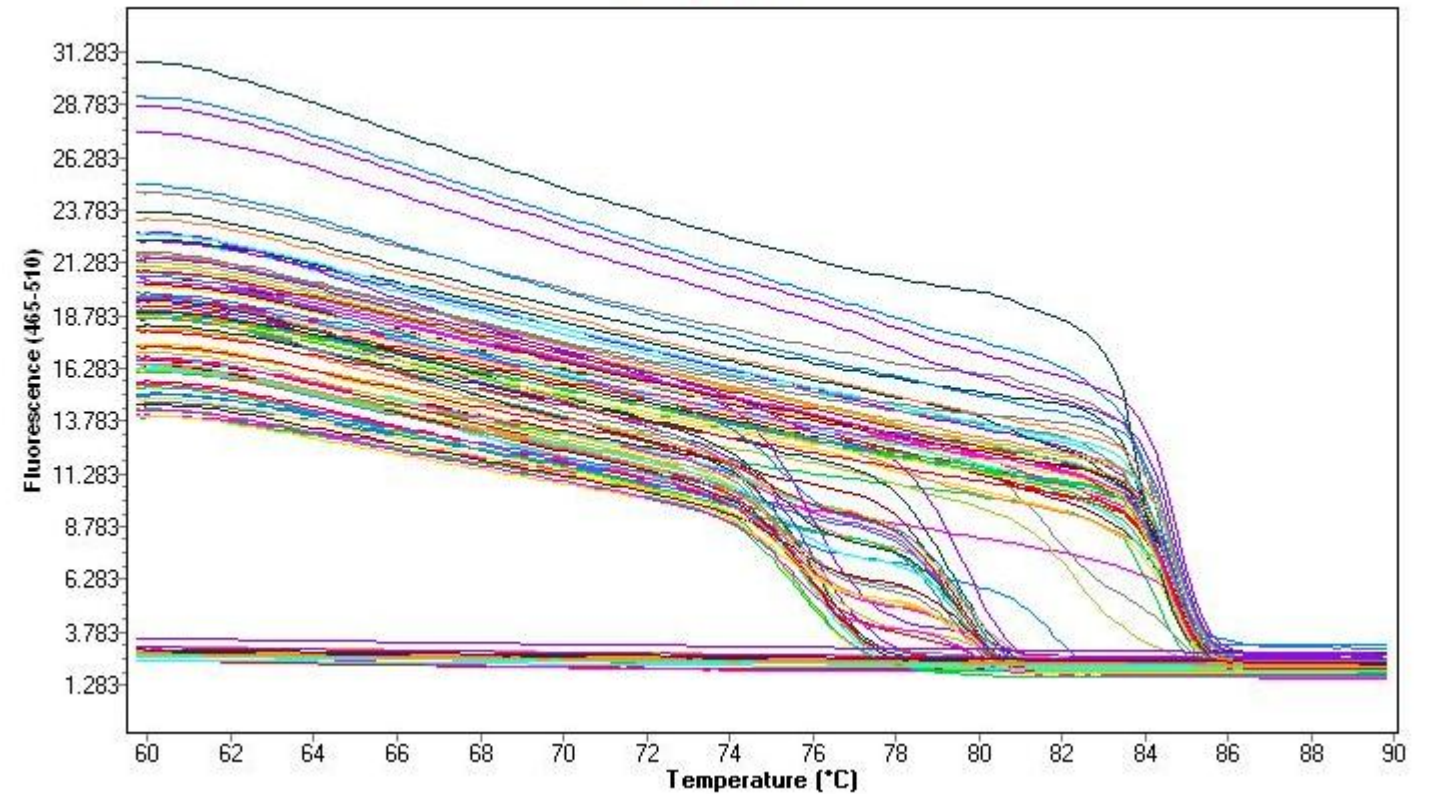

### Melting Peaks

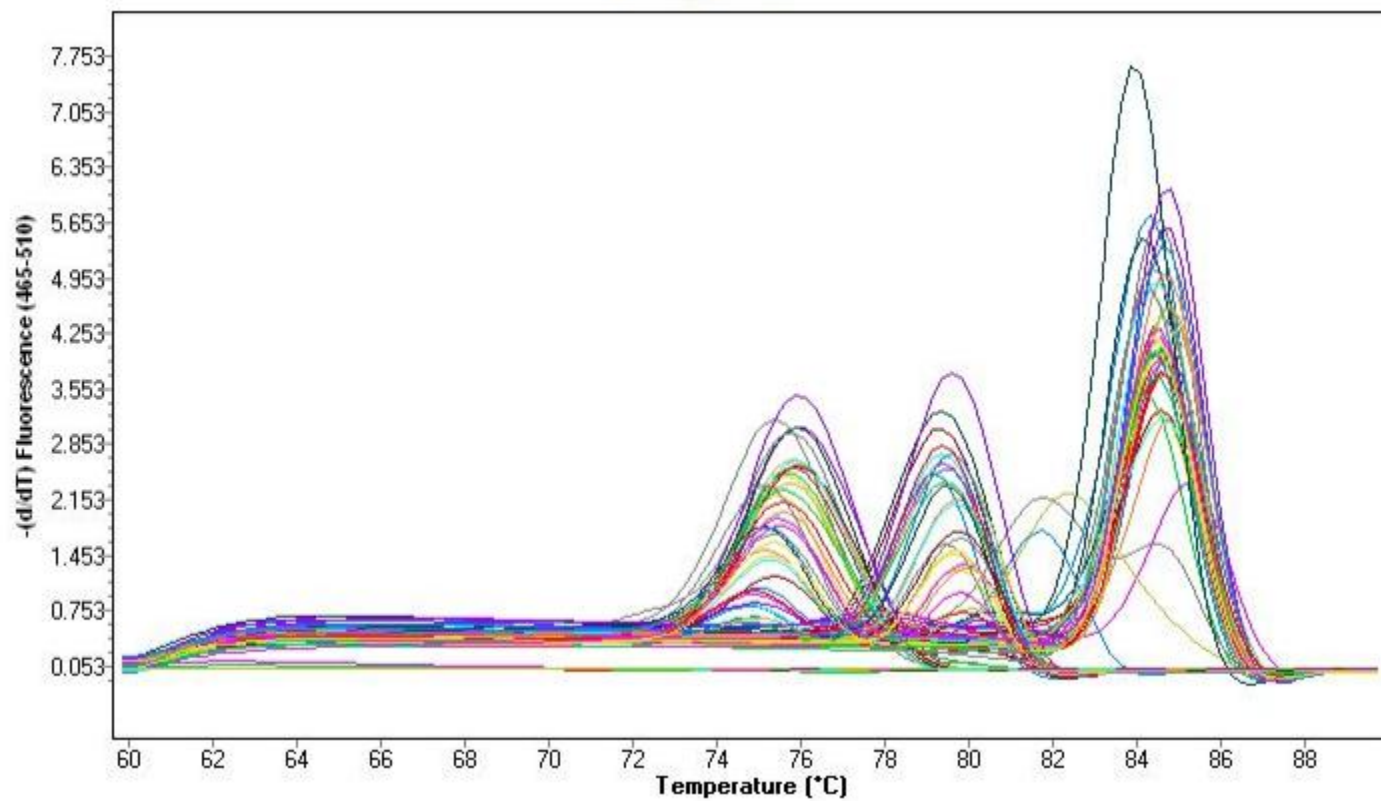

Analysis Notes
