# Supplementary material for: Exploring differential gene expression and biomarker potential in systemic lupus erythematosus: a retrospective study
Source: PeerJ journal article supplement (doi:10.7717/peerj.19891), 2025-09-08
Supplement: qPCR.zip [file qPCR.zip]

## Sheet: Sheet1
group	sample	gene	1	2	3	AVG
SLE	1	GAPDH	27.49	27.18	27.32	27.33	27.33
SLE	2	GAPDH	28.26	28.78	28.44	28.4933	28.49
SLE	3	GAPDH	21.25	21.23	21.12	21.2	21.2
SLE	4	GAPDH	31.94	32.34	32.15	32.1433	32.14
SLE	1	FCER1A	30.09	31.17	31.67	30.9767	30.98
SLE	2	FCER2A	32.38	33.16	31.99	32.51	32.51
SLE	3	FCER3A	25.45	25.54	25.32	25.4367	25.44
SLE	4	FCER4A	29.86	31.96	30.85	30.355	30.36
SLE	1	RGS1	35	34.28	35	34.76	34.76
SLE	2	RGS2	35	35	35	35	35
SLE	3	RGS3	26.45	26.48	27.27	26.7333	26.73
SLE	4	RGS4	35	35	35	35	35
SLE	5	GAPDH	24.44	24.5	24.51	24.4833	24.48
SLE	7	GAPDH	22.87	22.83	22.79	22.83	22.83
SLE	11	GAPDH	29.43	29.73	29.22	29.46	29.46
SLE	14	GAPDH	20.68	20.64	20.67	20.6633	20.66
SLE	5	FCER1A	29.94	29.68	29.28	29.6333	29.63
SLE	7	FCER1A	28.35	27.9	28.04	28.0967	28.1
SLE	11	FCER1A	31.14	30.93	30.88	30.9833	30.98
SLE	14	FCER1A	28.65	28.78	28.62	28.6833	28.68
SLE	5	RGS1	30.73	30.63	30.44	30.6	30.6
SLE	7	RGS1	28.91	28.53	28.72	28.72	28.72
SLE	11	RGS1	35	35	35	35	35
SLE	14	RGS1	29.01	28.68	28.9	28.8633	28.86
SLE	15	GAPDH	21.29	21.25	21.45	21.33	21.33
SLE	18	GAPDH	21.8	21.64	21.88	21.7733	21.77
SLE	19	GAPDH	21.57	21.51	21.51	21.53	21.53
SLE	20	GAPDH	21.88	21.81	21.81	21.8333	21.83
SLE	15	FCER1A	28.17	27.16	28.2	28.185	28.19
SLE	18	FCER1A	27.05	26.71	26.94	26.9	26.9
SLE	19	FCER1A	26.7	26.74	26.89	26.7767	26.78
SLE	20	FCER1A	27.15	27.65	27.23	27.3433	27.34
SLE	15	RGS1	30.04	28.89	27.88	28.385	28.39
SLE	18	RGS1	29.96	29.19	29.97	29.7067	29.71
SLE	19	RGS1	29.85	35	29.18	29.515	29.52
SLE	20	RGS1	30.74	30.46	30.89	30.6967	30.7
SLE	24	GAPDH	22.46	22.3	21.8	22.1867	22.19
SLE	26	GAPDH	21.97	22.05	22.02	22.0133	22.01
SLE	24	FCER1A	30.16	30.15	31.59	30.155	30.16
SLE	26	FCER1A	31.08	30.78	30.94	30.9333	30.93
SLE	24	RGS1	28.3	28.63	28.54	28.49	28.49
SLE	26	RGS1	27.61	27.44	27.53	27.5267	27.53
control	102	GAPDH	35	35	35	35	35
control	107	GAPDH	22.72	22.64	22.78	22.7133	22.71
control	110	GAPDH	21.66	21.67	21.74	21.69	21.69
control	113	GAPDH	26.5	26.7	26.75	26.65	26.65
control	102	FCER1A
control	107	FCER1A	29.61	31.26	35	31.26	31.26
control	110	FCER1A	32.68	32.25	29.76	32.465	32.47
control	113	FCER1A	28.76	34.2	35	34.6	34.6
control	102	RGS1			35		35
control	107	RGS1	32.27	31.94	32.92	32.3767	32.38
control	110	RGS1	31.9	32.08	32.79	32.2567	32.26
control	113	RGS1	35	35	35	35	35
control	115	GAPDH	21.75	21.9	21.87	21.84	21.84
control	117	GAPDH	22.14	22.1	22.14	22.1267	22.13
control	119	GAPDH	22.29	22.34	22.3	22.31	22.31
control	120	GAPDH	23.22	23.18	23.27	23.2233	23.22
control	115	FCER1A	29.54	29.79	29.17	29.5	29.5
control	117	FCER1A	28.82	29.01	29.05	28.96	28.96
control	119	FCER1A	28.88	28.85	28.74	28.8233	28.82
control	120	FCER1A	29.98	29.58	29.6	29.72	29.72
control	115	RGS1	30.86	31.61	29.98	30.8167	30.82
control	117	RGS1	32.01	31.96	31.95	31.9733	31.97
control	119	RGS1	31.95	31.39	31.38	31.5733	31.57
control	120	RGS1	31.95	31.48	31.47	31.6333	31.63

## Sheet: Sheet2
group	sample	gene	1	2	3	AVG	ΔCT	ΔΔCT
SLE	1	GAPDH	27.49	27.18	27.32	27.33
SLE	1	FCER1A	30.09	31.17	31.67	30.98	3.65	-4.14	17.63
SLE	1	RGS1	35	34.28	35	34.76	7.43	-1.88	3.68
SLE	2	GAPDH	28.26	28.78	28.44	28.49
SLE	2	FCER1A	32.38	33.16	31.99	32.51	4.02	-3.77	13.64
SLE	2	RGS1	35	35	35	35	6.51	-2.8	6.96
SLE	3	GAPDH	21.25	21.23	21.12	21.2
SLE	3	FCER1A	25.45	25.54	25.32	25.44	4.24	-3.55	11.71
SLE	3	RGS1	26.45	26.48	27.27	26.73	5.53	-3.78	13.74
SLE	4	GAPDH	31.94	32.34	32.15	32.14
SLE	4	FCER1A	29.86	31.96	30.85	30.36	-1.78	-9.57	760.08
SLE	4	RGS1	35	35	35	35	2.86	-6.45	87.43
SLE	5	GAPDH	24.44	24.5	24.51	24.48
SLE	5	FCER1A	29.94	29.68	29.28	29.63	5.15	-2.64	6.23
SLE	5	RGS1	30.73	30.63	30.44	30.6	6.12	-3.19	9.13
SLE	7	GAPDH	22.87	22.83	22.79	22.83
SLE	7	FCER1A	28.35	27.9	28.04	28.1	5.27	-2.52	5.74
SLE	7	RGS1	28.91	28.53	28.72	28.72	5.89	-3.42	10.7
SLE	11	GAPDH	29.43	29.73	29.22	29.46
SLE	11	FCER1A	31.14	30.93	30.88	30.98	1.52	-6.27	77.17
SLE	11	RGS1	35	35	35	35	5.54	-3.77	13.64
SLE	14	GAPDH	20.68	20.64	20.67	20.66
SLE	14	FCER1A	28.65	28.78	28.62	28.68	8.02	0.23	0.85
SLE	14	RGS1	29.01	28.68	28.9	28.86	8.2	-1.11	2.16
SLE	15	GAPDH	21.29	21.25	21.45	21.33
SLE	15	FCER1A	28.17	27.16	28.2	28.19	6.86	-0.93	1.91
SLE	15	RGS1	30.04	28.89	27.88	28.39	7.06	-2.25	4.76
SLE	18	GAPDH	21.8	21.64	21.88	21.77
SLE	18	FCER1A	27.05	26.71	26.94	26.9	5.13	-2.66	6.32
SLE	18	RGS1	29.96	29.19	29.97	29.71	7.94	-1.4	2.64
SLE	19	GAPDH	21.57	21.51	21.51	21.53
SLE	19	FCER1A	26.7	26.74	26.89	26.78	5.25	-2.54	5.82
SLE	19	RGS1	29.85	35	29.18	29.52	7.99	-1.32	2.5
SLE	20	GAPDH	21.88	21.81	21.81	21.83
SLE	20	FCER1A	27.15	27.65	27.23	27.34	5.51	-2.28	4.86
SLE	20	RGS1	30.74	30.46	30.89	30.7	8.87	-0.44	1.36
SLE	24	GAPDH	22.46	22.3	21.8	22.19
SLE	24	FCER1A	30.16	30.15	31.59	30.16	7.97	0.18	0.88
SLE	24	RGS1	28.3	28.63	28.54	28.49	6.3	-3.01	8.06
SLE	26	GAPDH	21.97	22.05	22.02	22.01
SLE	26	FCER1A	31.08	30.78	30.94	30.93	8.92	1.13	0.46
SLE	26	RGS1	27.61	27.44	27.53	27.53	5.52	-3.79	13.83
control	102	GADPH	21.27	21.27	21.24	21.26
control	102	FCER1A	28.99	28.65	28.83	28.82	7.56	-0.23	1.17
control	102	RGS1	30.65	29.67	30.72	30.69	9.43	0.12	0.92
control	107	GAPDH	22.72	22.64	22.78	22.71
control	107	FCER1A	29.61	31.26	35	31.26	8.55	0.76	0.59
control	107	RGS1	32.27	31.94	32.92	32.38	9.67	0.36	0.78
control	110	GAPDH	21.66	21.67	21.74	21.69
control	110	FCER1A	32.68	32.25	29.76	32.47	10.78	2.99	0.13
control	110	RGS1	31.9	32.08	32.79	32.26	10.57	1.26	0.42
control	113	GAPDH	26.5	26.7	26.75	26.65
control	113	FCER1A	28.76	34.2	35	34.6	7.95	0.16	0.9
control	113	RGS1	35	35	35	35	8.35	-0.96	1.95
control	115	GAPDH	21.75	21.9	21.87	21.84
control	115	FCER1A	29.54	29.79	29.17	29.5	7.66	-0.13	1.09
control	115	RGS1	30.86	31.61	29.98	30.82	8.98	-0.33	1.26
control	117	GAPDH	22.14	22.1	22.14	22.13
control	117	FCER1A	28.82	29.01	29.05	28.96	6.83	-0.96	1.95
control	117	RGS1	32.01	31.96	31.95	31.97	9.84	0.53	0.69
control	119	GAPDH	22.29	22.34	22.3	22.31
control	119	FCER1A	28.88	28.85	28.74	28.82	6.51	-1.28	2.43
control	119	RGS1	31.95	31.39	31.38	31.57	9.26	-0.05	1.04
control	120	GAPDH	23.22	23.18	23.27	23.22
control	120	FCER1A	29.98	29.58	29.6	29.72	6.5	-1.29	2.45
control	120	RGS1	31.95	31.48	31.47	31.63	8.41	-0.9	1.87

## Sheet: Sheet3
FCER1A ΔCT AVG	RGS1 ΔCT AVG	control
7.79	9.31

## Sheet: Sheet4
group	sample	gene	1	2	3	AVG	ΔCT	ΔΔCT
SLE	1	FCER1A	30.09	31.17	31.67	30.98	3.65	-4.14	17.63
SLE	2	FCER1A	32.38	33.16	31.99	32.51	4.02	-3.77	13.64
SLE	3	FCER1A	25.45	25.54	25.32	25.44	4.24	-3.55	11.71
SLE	4	FCER1A	29.86	31.96	30.85	30.36	-1.78	-9.57	760.08
SLE	5	FCER1A	29.94	29.68	29.28	29.63	5.15	-2.64	6.23
SLE	7	FCER1A	28.35	27.9	28.04	28.1	5.27	-2.52	5.74
SLE	11	FCER1A	31.14	30.93	30.88	30.98	1.52	-6.27	77.17
SLE	14	FCER1A	28.65	28.78	28.62	28.68	8.02	0.23	0.85
SLE	15	FCER1A	28.17	27.16	28.2	28.19	6.86	-0.93	1.91
SLE	18	FCER1A	27.05	26.71	26.94	26.9	5.13	-2.66	6.32
SLE	19	FCER1A	26.7	26.74	26.89	26.78	5.25	-2.54	5.82
SLE	20	FCER1A	27.15	27.65	27.23	27.34	5.51	-2.28	4.86
SLE	24	FCER1A	30.16	30.15	31.59	30.16	7.97	0.18	0.88
SLE	26	FCER1A	31.08	30.78	30.94	30.93	8.92	1.13	0.46
control	102	FCER1A	28.99	28.65	28.83	28.82	7.56	-0.23	1.17
control	107	FCER1A	29.61	31.26	35	31.26	8.55	0.76	0.59
control	110	FCER1A	32.68	32.25	29.76	32.47	10.78	2.99	0.13
control	113	FCER1A	28.76	34.2	35	34.6	7.95	0.16	0.9
control	115	FCER1A	29.54	29.79	29.17	29.5	7.66	-0.13	1.09
control	117	FCER1A	28.82	29.01	29.05	28.96	6.83	-0.96	1.95
control	119	FCER1A	28.88	28.85	28.74	28.82	6.51	-1.28	2.43
control	120	FCER1A	29.98	29.58	29.6	29.72	6.5	-1.29	2.45
SLE	1	RGS1	35	34.28	35	34.76	7.43	-1.88	3.68
SLE	2	RGS1	35	35	35	35	6.51	-2.8	6.96
SLE	3	RGS1	26.45	26.48	27.27	26.73	5.53	-3.78	13.74
SLE	4	RGS1	35	35	35	35	2.86	-6.45	87.43
SLE	5	RGS1	30.73	30.63	30.44	30.6	6.12	-3.19	9.13
SLE	7	RGS1	28.91	28.53	28.72	28.72	5.89	-3.42	10.7
SLE	11	RGS1	35	35	35	35	5.54	-3.77	13.64
SLE	14	RGS1	29.01	28.68	28.9	28.86	8.2	-1.11	2.16
SLE	15	RGS1	30.04	28.89	27.88	28.39	7.06	-2.25	4.76
SLE	18	RGS1	29.96	29.19	29.97	29.71	7.94	-1.4	2.64
SLE	19	RGS1	29.85	35	29.18	29.52	7.99	-1.32	2.5
SLE	20	RGS1	30.74	30.46	30.89	30.7	8.87	-0.44	1.36
SLE	24	RGS1	28.3	28.63	28.54	28.49	6.3	-3.01	8.06
SLE	26	RGS1	27.61	27.44	27.53	27.53	5.52	-3.79	13.83
control	102	RGS1	30.65	29.67	30.72	30.69	9.43	0.12	0.92
control	107	RGS1	32.27	31.94	32.92	32.38	9.67	0.36	0.78
control	110	RGS1	31.9	32.08	32.79	32.26	10.57	1.26	0.42
control	113	RGS1	35	35	35	35	8.35	-0.96	1.95
control	115	RGS1	30.86	31.61	29.98	30.82	8.98	-0.33	1.26
control	117	RGS1	32.01	31.96	31.95	31.97	9.84	0.53	0.69
control	119	RGS1	31.95	31.39	31.38	31.57	9.26	-0.05	1.04
control	120	RGS1	31.95	31.48	31.47	31.63	8.41	-0.9	1.87

## Sheet: 1220 拆分
group	sample	gene	1	ΔCT	ΔΔCT	c
SLE	1	GAPDH	27.33		9.31
SLE	1	RGS1	35	7.67	-1.64	3.12
SLE	1	RGS1	34.28	6.95	-2.36	5.13
SLE	1	RGS1	35	7.67	-1.64	3.12
SLE	2	GAPDH	28.49
SLE	2	RGS1	35	6.51	-2.8	6.96
SLE	2	RGS1	35	6.51	-2.8	6.96
SLE	2	RGS1	35	6.51	-2.8	6.96
SLE	3	GAPDH	21.2
SLE	3	RGS1	26.45	5.25	-4.06	16.68
SLE	3	RGS1	26.48	5.28	-4.03	16.34
SLE	3	RGS1	27.27	6.07	-3.24	9.45
SLE	4	GAPDH	32.14
SLE	4	RGS1	35	2.86	-6.45	87.43
SLE	4	RGS1	35	2.86	-6.45	87.43
SLE	4	RGS1	35	2.86	-6.45	87.43
SLE	5	GAPDH	24.48
SLE	5	RGS1	30.73	6.25	-3.06	8.34
SLE	5	RGS1	30.63	6.15	-3.16	8.94
SLE	5	RGS1	30.44	5.96	-3.35	10.2
SLE	7	GAPDH	22.83
SLE	7	RGS1	28.91	6.08	-3.23	9.38
SLE	7	RGS1	28.53	5.7	-3.61	12.21
SLE	7	RGS1	28.72	5.89	-3.42	10.7
SLE	11	GAPDH	29.46
SLE	11	RGS1	35	5.54	-3.77	13.64
SLE	11	RGS1	35	5.54	-3.77	13.64
SLE	11	RGS1	35	5.54	-3.77	13.64
SLE	14	GAPDH	20.66
SLE	14	RGS1	29.01	8.35	-0.96	1.95
SLE	14	RGS1	28.68	8.02	-1.29	2.45
SLE	14	RGS1	28.9	8.24	-1.07	2.1
SLE	15	GAPDH	21.33
SLE	15	RGS1	30.04	8.71	-0.6	1.52
SLE	15	RGS1	28.89	7.56	-1.75	3.36
SLE	15	RGS1	27.88	6.55	-2.76	6.77
SLE	18	GAPDH	21.77
SLE	18	RGS1	29.96	8.19	-1.12	2.17
SLE	18	RGS1	29.19	7.42	-1.89	3.71
SLE	18	RGS1	29.97	8.2	-1.11	2.16
SLE	19	GAPDH	21.53
SLE	19	RGS1	29.85	8.32	-0.99	1.99
SLE	19	RGS1	35	13.47	4.16	0.06
SLE	19	RGS1	29.18	7.65	-1.66	3.16
SLE	20	GAPDH	21.83
SLE	20	RGS1	30.74	8.91	-0.4	1.32
SLE	20	RGS1	30.46	8.63	-0.68	1.6
SLE	20	RGS1	30.89	9.06	-0.25	1.19
SLE	24	GAPDH	22.19
SLE	24	RGS1	28.3	6.11	-3.2	9.19
SLE	24	RGS1	28.63	6.44	-2.87	7.31
SLE	24	RGS1	28.54	6.35	-2.96	7.78
SLE	26	GAPDH	22.01
SLE	26	RGS1	27.61	5.6	-3.71	13.09
SLE	26	RGS1	27.44	5.43	-3.88	14.72
SLE	26	RGS1	27.53	5.52	-3.79	13.83
control	102	GADPH	21.26
control	102	RGS1	30.72	9.46	0.15	0.9
control	102	RGS1	29.67	8.41	-0.9	1.87
control	102	RGS1	30.65	9.39	0.08	0.95
control	107	GAPDH	22.71
control	107	RGS1	31.94	9.23	-0.08	1.06
control	107	RGS1	32.27	9.56	0.25	0.84
control	107	RGS1	32.92	10.21	0.9	0.54
control	110	GAPDH	21.69
control	110	RGS1	32.08	10.39	1.08	0.47
control	110	RGS1	31.9	10.21	0.9	0.54
control	110	RGS1	32.79	11.1	1.79	0.29
control	113	GAPDH	26.65
control	113	RGS1	35	8.35	-0.96	1.95
control	113	RGS1	35	8.35	-0.96	1.95
control	113	RGS1	35	8.35	-0.96	1.95
control	115	GAPDH	21.84
control	115	RGS1	31.61	9.77	0.46	0.73
control	115	RGS1	30.86	9.02	-0.29	1.22
control	117	RGS1	29.98	8.14	-1.17	2.25
control	117	GAPDH	22.13
control	117	RGS1	31.96	9.83	0.52	0.7
control	117	RGS1	32.01	9.88	0.57	0.67
control	117	RGS1	31.95	9.82	0.51	0.7
control	119	GAPDH	22.31
control	119	RGS1	31.39	9.08	-0.23	1.17
control	119	RGS1	31.95	9.64	0.33	0.8
control	119	RGS1	31.38	9.07	-0.24	1.18
control	120	GAPDH	23.22
control	120	RGS1	31.48	8.26	-1.05	2.07
control	120	RGS1	31.95	8.73	-0.58	1.49
control	120	RGS1	31.47	8.25	-1.06	2.08

## Sheet: Sheet6
group	sample	gene
SLE	1	RGS1	3.12
SLE	1	RGS1	5.13
SLE	1	RGS1	3.12
SLE	2	RGS1	6.96
SLE	2	RGS1	6.96
SLE	2	RGS1	6.96
SLE	3	RGS1	16.68
SLE	3	RGS1	16.34
SLE	3	RGS1	9.45
SLE	4	RGS1	87.43
SLE	4	RGS1	87.43
SLE	4	RGS1	87.43
SLE	5	RGS1	8.34
SLE	5	RGS1	8.94
SLE	5	RGS1	10.2
SLE	7	RGS1	9.38
SLE	7	RGS1	12.21
SLE	7	RGS1	10.7
SLE	11	RGS1	13.64
SLE	11	RGS1	13.64
SLE	11	RGS1	13.64
SLE	14	RGS1	1.95
SLE	14	RGS1	2.45
SLE	14	RGS1	2.1
SLE	15	RGS1	1.52
SLE	15	RGS1	3.36
SLE	15	RGS1	6.77
SLE	18	RGS1	2.17
SLE	18	RGS1	3.71
SLE	18	RGS1	2.16
SLE	19	RGS1	1.99
SLE	19	RGS1	0.06
SLE	19	RGS1	3.16
SLE	20	RGS1	1.32
SLE	20	RGS1	1.6
SLE	20	RGS1	1.19
SLE	24	RGS1	9.19
SLE	24	RGS1	7.31
SLE	24	RGS1	7.78
SLE	26	RGS1	13.09
SLE	26	RGS1	14.72
SLE	26	RGS1	13.83
control	102	RGS1	0.9
control	102	RGS1	1.87
control	102	RGS1	0.95
control	107	RGS1	1.06
control	107	RGS1	0.84
control	107	RGS1	0.54
control	110	RGS1	0.47
control	110	RGS1	0.54
control	110	RGS1	0.29
control	113	RGS1	1.95
control	113	RGS1	1.95
control	113	RGS1	1.95
control	115	RGS1	0.73
control	115	RGS1	1.22
control	117	RGS1	2.25
control	117	RGS1	0.7
control	117	RGS1	0.67
control	117	RGS1	0.7
control	119	RGS1	1.17
control	119	RGS1	0.8
control	119	RGS1	1.18
control	120	RGS1	2.07
control	120	RGS1	1.49
control	120	RGS1	2.08
