# Supplementary material for: Exploring differential gene expression and biomarker potential in systemic lupus erythematosus: a retrospective study
Source: PeerJ journal article supplement (doi:10.7717/peerj.19891), 2025-09-08
Supplement: qPCR.zip [file qPCR.zip]

# cobas® 4800 User Defined Workflow (UDF)

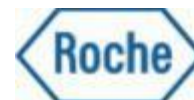

## 20241213xj plate2

### Experiment

|               |                       |                    |                                    |
|---------------|-----------------------|--------------------|------------------------------------|
| Creation Date | 12/13/2024 9:04:56 AM | Last Modified Date | 12/13/2024 10:12:02 AM             |
| Operator      | System Admin          | Owner              | System Admin                       |
| Start Time    | 12/13/2024 9:10:30 AM | End Time           | 12/13/2024 10:09:29 AM             |
| Run State     | Completed             | Software Version   | LCS480 1.5.1.62 SP3 - UDF 2.1.0.26 |
| Macro         |                       | Macro Owner        |                                    |
| Macro Status  |                       |                    |                                    |
| Templates     | gongying              | Plate ID           |                                    |
| Test ID       |                       | Lot ID             |                                    |
| Color Comp ID |                       |                    |                                    |
| Run Notes     |                       |                    |                                    |

### Programs

|              |         |               |      |
|--------------|---------|---------------|------|
| Program Name | Program |               |      |
| Cycles       | 1       | Analysis Mode | None |

| Target (°C) | Acquisition Mode | Hold (hh:mm:ss) | Ramp Rate (°C/s) | Acquisitions (per °C) | Sec Target (°C) | Step size (°C) | Step Delay (cycles) |
|-------------|------------------|-----------------|------------------|-----------------------|-----------------|----------------|---------------------|
| 95          | None             | 00:00:30        | 4.40             |                       | 0               | 0              | 0                   |

|              |         |               |                |
|--------------|---------|---------------|----------------|
| Program Name | Program |               |                |
| Cycles       | 40      | Analysis Mode | Quantification |

| Target (°C) | Acquisition Mode | Hold (hh:mm:ss) | Ramp Rate (°C/s) | Acquisitions (per °C) | Sec Target (°C) | Step size (°C) | Step Delay (cycles) |
|-------------|------------------|-----------------|------------------|-----------------------|-----------------|----------------|---------------------|
| 95          | None             | 00:00:15        | 4.40             |                       | 0               | 0              | 0                   |
| 60          | Single           | 00:00:30        | 2.20             |                       | 0               | 0              | 0                   |

|              |         |               |                |
|--------------|---------|---------------|----------------|
| Program Name | Program |               |                |
| Cycles       | 1       | Analysis Mode | Melting Curves |

| Target (°C) | Acquisition Mode | Hold (hh:mm:ss) | Ramp Rate (°C/s) | Acquisitions (per °C) | Sec Target (°C) | Step size (°C) | Step Delay (cycles) |
|-------------|------------------|-----------------|------------------|-----------------------|-----------------|----------------|---------------------|
| 95          | None             | 00:01:00        | 4.40             |                       | 0               | 0              | 0                   |
| 60          | None             | 00:00:30        | 2.20             |                       | 0               | 0              | 0                   |
| 90          | Continuous       |                 | 0.11             | 5                     | 0               | 0              | 0                   |

|              |         |               |      |
|--------------|---------|---------------|------|
| Program Name | Program |               |      |
| Cycles       | 1       | Analysis Mode | None |

| Target (°C) | Acquisition Mode | Hold (hh:mm:ss) | Ramp Rate (°C/s) | Acquisitions (per °C) | Sec Target (°C) | Step size (°C) | Step Delay (cycles) |
|-------------|------------------|-----------------|------------------|-----------------------|-----------------|----------------|---------------------|
|-------------|------------------|-----------------|------------------|-----------------------|-----------------|----------------|---------------------|

| Target (°C) | Acquisition Mode | Hold (hh:mm:ss) | Ramp Rate (°C/s) | Acquisitions (per °C) | Sec Target (°C) | Step size (°C) | Step Delay (cycles) |
|-------------|------------------|-----------------|------------------|-----------------------|-----------------|----------------|---------------------|
| 40          | None             | 00:00:30        | 2.20             |                       | 0               | 0              | 0                   |

## Samples

|              |     |             |    |          |              |
|--------------|-----|-------------|----|----------|--------------|
| Sample Count |     | 96          |    |          |              |
| Subset       |     | All Samples |    |          |              |
|              | Pos | Name        | ID | Repl. Of | Sample Notes |
|              | A1  | GAPDH 15    |    |          |              |
|              | A2  | GAPDH 15    |    |          |              |
|              | A3  | GAPDH 15    |    |          |              |
|              | A4  | GAPDH 18    |    |          |              |
|              | A5  | GAPDH 18    |    |          |              |
|              | A6  | GAPDH 18    |    |          |              |
|              | A7  | GAPDH 19    |    |          |              |
|              | A8  | GAPDH 19    |    |          |              |
|              | A9  | GAPDH 19    |    |          |              |
|              | A10 | GAPDH 20    |    |          |              |
|              | A11 | GAPDH 20    |    |          |              |
|              | A12 | GAPDH 20    |    |          |              |
|              | B1  | FCER1A 15   |    |          |              |
|              | B2  | FCER1A 15   |    |          |              |
|              | B3  | FCER1A 15   |    |          |              |
|              | B4  | FCER1A 18   |    |          |              |
|              | B5  | FCER1A 18   |    |          |              |
|              | B6  | FCER1A 18   |    |          |              |
|              | B7  | FCER1A 19   |    |          |              |
|              | B8  | FCER1A 19   |    |          |              |
|              | B9  | FCER1A 19   |    |          |              |
|              | B10 | FCER1A 20   |    |          |              |
|              | B11 | FCER1A 20   |    |          |              |
|              | B12 | FCER1A 20   |    |          |              |
|              | C1  | RGS1 15     |    |          |              |
|              | C2  | RGS1 15     |    |          |              |
|              | C3  | RGS1 15     |    |          |              |
|              | C4  | RGS1 18     |    |          |              |
|              | C5  | RGS1 18     |    |          |              |
|              | C6  | RGS1 18     |    |          |              |
|              | C7  | RGS1 19     |    |          |              |
|              | C8  | RGS1 19     |    |          |              |
|              | C9  | RGS1 19     |    |          |              |
|              | C10 | RGS1 20     |    |          |              |
|              | C11 | RGS1 20     |    |          |              |
|              | C12 | RGS1 20     |    |          |              |

## Samples

| Sample Count |           | 96          |          |              |
|--------------|-----------|-------------|----------|--------------|
| Subset       |           | All Samples |          |              |
| Pos          | Name      | ID          | Repl. Of | Sample Notes |
| D1           | GAPDH 24  |             |          |              |
| D2           | GAPDH 24  |             |          |              |
| D3           | GAPDH 24  |             |          |              |
| D4           | GAPDH 26  |             |          |              |
| D5           | GAPDH 26  |             |          |              |
| D6           | GAPDH 26  |             |          |              |
| D7           |           |             |          |              |
| D8           |           |             |          |              |
| D9           |           |             |          |              |
| D10          |           |             |          |              |
| D11          |           |             |          |              |
| D12          |           |             |          |              |
| E1           | FCER1A 24 |             |          |              |
| E2           | FCER1A 24 |             |          |              |
| E3           | FCER1A 24 |             |          |              |
| E4           | FCER1A 26 |             |          |              |
| E5           | FCER1A 26 |             |          |              |
| E6           | FCER1A 26 |             |          |              |
| E7           |           |             |          |              |
| E8           |           |             |          |              |
| E9           |           |             |          |              |
| E10          |           |             |          |              |
| E11          |           |             |          |              |
| E12          |           |             |          |              |
| F1           | RGS1 24   |             |          |              |
| F2           | RGS1 24   |             |          |              |
| F3           | RGS1 24   |             |          |              |
| F4           | RGS1 26   |             |          |              |
| F5           | RGS1 26   |             |          |              |
| F6           | RGS1 26   |             |          |              |
| F7           |           |             |          |              |
| F8           |           |             |          |              |
| F9           |           |             |          |              |
| F10          |           |             |          |              |
| F11          |           |             |          |              |
| F12          |           |             |          |              |
| G1           |           |             |          |              |
| G2           |           |             |          |              |
| G3           |           |             |          |              |

Samples

|              |             |    |          |              |  |
|--------------|-------------|----|----------|--------------|--|
| Sample Count | 96          |    |          |              |  |
| Subset       | All Samples |    |          |              |  |
| Pos          | Name        | ID | Repl. Of | Sample Notes |  |
| G4           |             |    |          |              |  |
| G5           |             |    |          |              |  |
| G6           |             |    |          |              |  |
| G7           |             |    |          |              |  |
| G8           |             |    |          |              |  |
| G9           |             |    |          |              |  |
| G10          |             |    |          |              |  |
| G11          |             |    |          |              |  |
| G12          |             |    |          |              |  |
| H1           |             |    |          |              |  |
| H2           |             |    |          |              |  |
| H3           |             |    |          |              |  |
| H4           |             |    |          |              |  |
| H5           |             |    |          |              |  |
| H6           |             |    |          |              |  |
| H7           |             |    |          |              |  |
| H8           |             |    |          |              |  |
| H9           |             |    |          |              |  |
| H10          |             |    |          |              |  |
| H11          |             |    |          |              |  |
| H12          |             |    |          |              |  |

Instrument

|      |      |               |       |
|------|------|---------------|-------|
| Name | Z480 | Serial Number | 56319 |
|------|------|---------------|-------|

Revision History

|          |      |      |        |
|----------|------|------|--------|
| Revision | Date | User | Reason |
|          |      |      |        |

Abs Quant/2nd Derivative Max for All Samples (Abs Quant/2nd Derivative Max)

Settings

|                    |                 |  |       |  |
|--------------------|-----------------|--|-------|--|
| Channel            | 465-510         |  |       |  |
| Color Compensation | Off             |  |       |  |
| Program            | Program         |  | Units |  |
| Mode               | High Confidence |  |       |  |

|             |             |
|-------------|-------------|
| Subset Name | All Samples |
|-------------|-------------|

Results

|                            |                                    |      |    |               |          |        |
|----------------------------|------------------------------------|------|----|---------------|----------|--------|
| > - Note CP pos. N (as mte | ive cycles) has higher uncertainty | Type | CP | Concentration | Standard | Status |
|----------------------------|------------------------------------|------|----|---------------|----------|--------|

## Results

| Inc                                 | Pos | Name      | Type    | CP    | Concentration | Standard | Status |
|-------------------------------------|-----|-----------|---------|-------|---------------|----------|--------|
| <input checked="" type="checkbox"/> | A1  | GAPDH 15  | Unknown |       |               |          |        |
| <input checked="" type="checkbox"/> | A2  | GAPDH 15  | Unknown |       |               |          |        |
| <input checked="" type="checkbox"/> | A3  | GAPDH 15  | Unknown |       |               |          |        |
| <input checked="" type="checkbox"/> | A4  | GAPDH 18  | Unknown |       |               |          |        |
| <input checked="" type="checkbox"/> | A5  | GAPDH 18  | Unknown |       |               |          |        |
| <input checked="" type="checkbox"/> | A6  | GAPDH 18  | Unknown |       |               |          |        |
| <input checked="" type="checkbox"/> | A7  | GAPDH 19  | Unknown |       |               |          |        |
| <input checked="" type="checkbox"/> | A8  | GAPDH 19  | Unknown |       |               |          |        |
| <input checked="" type="checkbox"/> | A9  | GAPDH 19  | Unknown |       |               |          |        |
| <input checked="" type="checkbox"/> | A10 | GAPDH 20  | Unknown |       |               |          |        |
| <input checked="" type="checkbox"/> | A11 | GAPDH 20  | Unknown |       |               |          |        |
| <input checked="" type="checkbox"/> | A12 | GAPDH 20  | Unknown |       |               |          |        |
| <input checked="" type="checkbox"/> | B1  | FCER1A 15 | Unknown |       |               |          |        |
| <input checked="" type="checkbox"/> | B2  | FCER1A 15 | Unknown |       |               |          |        |
| <input checked="" type="checkbox"/> | B3  | FCER1A 15 | Unknown |       |               |          |        |
| <input checked="" type="checkbox"/> | B4  | FCER1A 18 | Unknown |       |               |          |        |
| <input checked="" type="checkbox"/> | B5  | FCER1A 18 | Unknown |       |               |          |        |
| <input checked="" type="checkbox"/> | B6  | FCER1A 18 | Unknown |       |               |          |        |
| <input checked="" type="checkbox"/> | B7  | FCER1A 19 | Unknown |       |               |          |        |
| <input checked="" type="checkbox"/> | B8  | FCER1A 19 | Unknown |       |               |          |        |
| <input checked="" type="checkbox"/> | B9  | FCER1A 19 | Unknown |       |               |          |        |
| <input checked="" type="checkbox"/> | B10 | FCER1A 20 | Unknown |       |               |          |        |
| <input checked="" type="checkbox"/> | B11 | FCER1A 20 | Unknown |       |               |          |        |
| <input checked="" type="checkbox"/> | B12 | FCER1A 20 | Unknown |       |               |          |        |
| <input checked="" type="checkbox"/> | C1  | RGS1 15   | Unknown | 30.04 |               |          |        |
| <input checked="" type="checkbox"/> | C2  | RGS1 15   | Unknown | 28.89 |               |          |        |
| <input checked="" type="checkbox"/> | C3  | RGS1 15   | Unknown | 27.88 |               |          |        |
| <input checked="" type="checkbox"/> | C4  | RGS1 18   | Unknown | 29.96 |               |          |        |
| <input checked="" type="checkbox"/> | C5  | RGS1 18   | Unknown | 29.19 |               |          |        |
| <input checked="" type="checkbox"/> | C6  | RGS1 18   | Unknown | 29.97 |               |          |        |
| <input checked="" type="checkbox"/> | C7  | RGS1 19   | Unknown | 29.85 |               |          |        |
| <input checked="" type="checkbox"/> | C8  | RGS1 19   | Unknown | 35.00 |               |          | >      |
| <input checked="" type="checkbox"/> | C9  | RGS1 19   | Unknown | 29.18 |               |          |        |
| <input checked="" type="checkbox"/> | C10 | RGS1 20   | Unknown | 30.74 |               |          |        |
| <input checked="" type="checkbox"/> | C11 | RGS1 20   | Unknown | 30.46 |               |          |        |
| <input checked="" type="checkbox"/> | C12 | RGS1 20   | Unknown | 30.89 |               |          |        |
| <input checked="" type="checkbox"/> | D1  | GAPDH 24  | Unknown | 30.16 |               |          |        |

> - Late Cp call (last five cycles) has higher uncertainty

## Results

| Inc                                 | Pos | Name      | Type    | CP    | Concentration | Standard | Status |
|-------------------------------------|-----|-----------|---------|-------|---------------|----------|--------|
| <input checked="" type="checkbox"/> | D2  | GAPDH 24  | Unknown | 30.15 |               |          |        |
| <input checked="" type="checkbox"/> | D3  | GAPDH 24  | Unknown | 31.59 |               |          |        |
| <input checked="" type="checkbox"/> | D4  | GAPDH 26  | Unknown | 31.08 |               |          |        |
| <input checked="" type="checkbox"/> | D5  | GAPDH 26  | Unknown | 30.78 |               |          |        |
| <input checked="" type="checkbox"/> | D6  | GAPDH 26  | Unknown | 30.94 |               |          |        |
| <input checked="" type="checkbox"/> | D7  |           | Unknown |       |               |          |        |
| <input checked="" type="checkbox"/> | D8  |           | Unknown | 35.00 |               |          | >      |
| <input checked="" type="checkbox"/> | D9  |           | Unknown | 35.00 |               |          | >      |
| <input checked="" type="checkbox"/> | D10 |           | Unknown | 35.00 |               |          | >      |
| <input checked="" type="checkbox"/> | D11 |           | Unknown |       |               |          |        |
| <input checked="" type="checkbox"/> | D12 |           | Unknown |       |               |          |        |
| <input checked="" type="checkbox"/> | E1  | FCER1A 24 | Unknown | 22.46 |               |          |        |
| <input checked="" type="checkbox"/> | E2  | FCER1A 24 | Unknown | 22.30 |               |          |        |
| <input checked="" type="checkbox"/> | E3  | FCER1A 24 | Unknown | 21.80 |               |          |        |
| <input checked="" type="checkbox"/> | E4  | FCER1A 26 | Unknown | 21.97 |               |          |        |
| <input checked="" type="checkbox"/> | E5  | FCER1A 26 | Unknown | 22.05 |               |          |        |
| <input checked="" type="checkbox"/> | E6  | FCER1A 26 | Unknown | 22.02 |               |          |        |
| <input checked="" type="checkbox"/> | E7  |           | Unknown | 35.00 |               |          | >      |
| <input checked="" type="checkbox"/> | E8  |           | Unknown |       |               |          |        |
| <input checked="" type="checkbox"/> | E9  |           | Unknown | 35.00 |               |          | >      |
| <input checked="" type="checkbox"/> | E10 |           | Unknown |       |               |          |        |
| <input checked="" type="checkbox"/> | E11 |           | Unknown |       |               |          |        |
| <input checked="" type="checkbox"/> | E12 |           | Unknown | 35.00 |               |          | >      |
| <input checked="" type="checkbox"/> | F1  | RGS1 24   | Unknown | 28.30 |               |          |        |
| <input checked="" type="checkbox"/> | F2  | RGS1 24   | Unknown | 28.63 |               |          |        |
| <input checked="" type="checkbox"/> | F3  | RGS1 24   | Unknown | 28.54 |               |          |        |
| <input checked="" type="checkbox"/> | F4  | RGS1 26   | Unknown | 27.61 |               |          |        |
| <input checked="" type="checkbox"/> | F5  | RGS1 26   | Unknown | 27.44 |               |          |        |
| <input checked="" type="checkbox"/> | F6  | RGS1 26   | Unknown | 27.53 |               |          |        |
| <input checked="" type="checkbox"/> | F7  |           | Unknown | 35.00 |               |          | >      |
| <input checked="" type="checkbox"/> | F8  |           | Unknown |       |               |          |        |
| <input checked="" type="checkbox"/> | F9  |           | Unknown | 35.00 |               |          | >      |
| <input checked="" type="checkbox"/> | F10 |           | Unknown | 35.00 |               |          | >      |
| <input checked="" type="checkbox"/> | F11 |           | Unknown | 35.00 |               |          | >      |
| <input checked="" type="checkbox"/> | F12 |           | Unknown | 35.00 |               |          | >      |
| <input checked="" type="checkbox"/> | G1  |           | Unknown | 28.17 |               |          |        |
| <input checked="" type="checkbox"/> | G2  |           | Unknown | 27.16 |               |          |        |

> - Late Cp call (last five cycles) has higher uncertainty

## Results

| Inc                                 | Pos | Name | Type    | CP    | Concentration | Standard | Status |
|-------------------------------------|-----|------|---------|-------|---------------|----------|--------|
| <input checked="" type="checkbox"/> | G3  |      | Unknown | 28.20 |               |          |        |
| <input checked="" type="checkbox"/> | G4  |      | Unknown | 27.05 |               |          |        |
| <input checked="" type="checkbox"/> | G5  |      | Unknown | 26.71 |               |          |        |
| <input checked="" type="checkbox"/> | G6  |      | Unknown | 26.94 |               |          |        |
| <input checked="" type="checkbox"/> | G7  |      | Unknown | 26.70 |               |          |        |
| <input checked="" type="checkbox"/> | G8  |      | Unknown | 26.74 |               |          |        |
| <input checked="" type="checkbox"/> | G9  |      | Unknown | 26.89 |               |          |        |
| <input checked="" type="checkbox"/> | G10 |      | Unknown | 27.15 |               |          |        |
| <input checked="" type="checkbox"/> | G11 |      | Unknown | 27.65 |               |          |        |
| <input checked="" type="checkbox"/> | G12 |      | Unknown | 27.23 |               |          |        |
| <input checked="" type="checkbox"/> | H1  |      | Unknown | 21.29 |               |          |        |
| <input checked="" type="checkbox"/> | H2  |      | Unknown | 21.25 |               |          |        |
| <input checked="" type="checkbox"/> | H3  |      | Unknown | 21.45 |               |          |        |
| <input checked="" type="checkbox"/> | H4  |      | Unknown | 21.80 |               |          |        |
| <input checked="" type="checkbox"/> | H5  |      | Unknown | 21.64 |               |          |        |
| <input checked="" type="checkbox"/> | H6  |      | Unknown | 21.88 |               |          |        |
| <input checked="" type="checkbox"/> | H7  |      | Unknown | 21.57 |               |          |        |
| <input checked="" type="checkbox"/> | H8  |      | Unknown | 21.51 |               |          |        |
| <input checked="" type="checkbox"/> | H9  |      | Unknown | 21.51 |               |          |        |
| <input checked="" type="checkbox"/> | H10 |      | Unknown | 21.88 |               |          |        |
| <input checked="" type="checkbox"/> | H11 |      | Unknown | 21.81 |               |          |        |
| <input checked="" type="checkbox"/> | H12 |      | Unknown | 21.81 |               |          |        |

> - Late Cp call (last five cycles) has higher uncertainty

### Amplification Curves

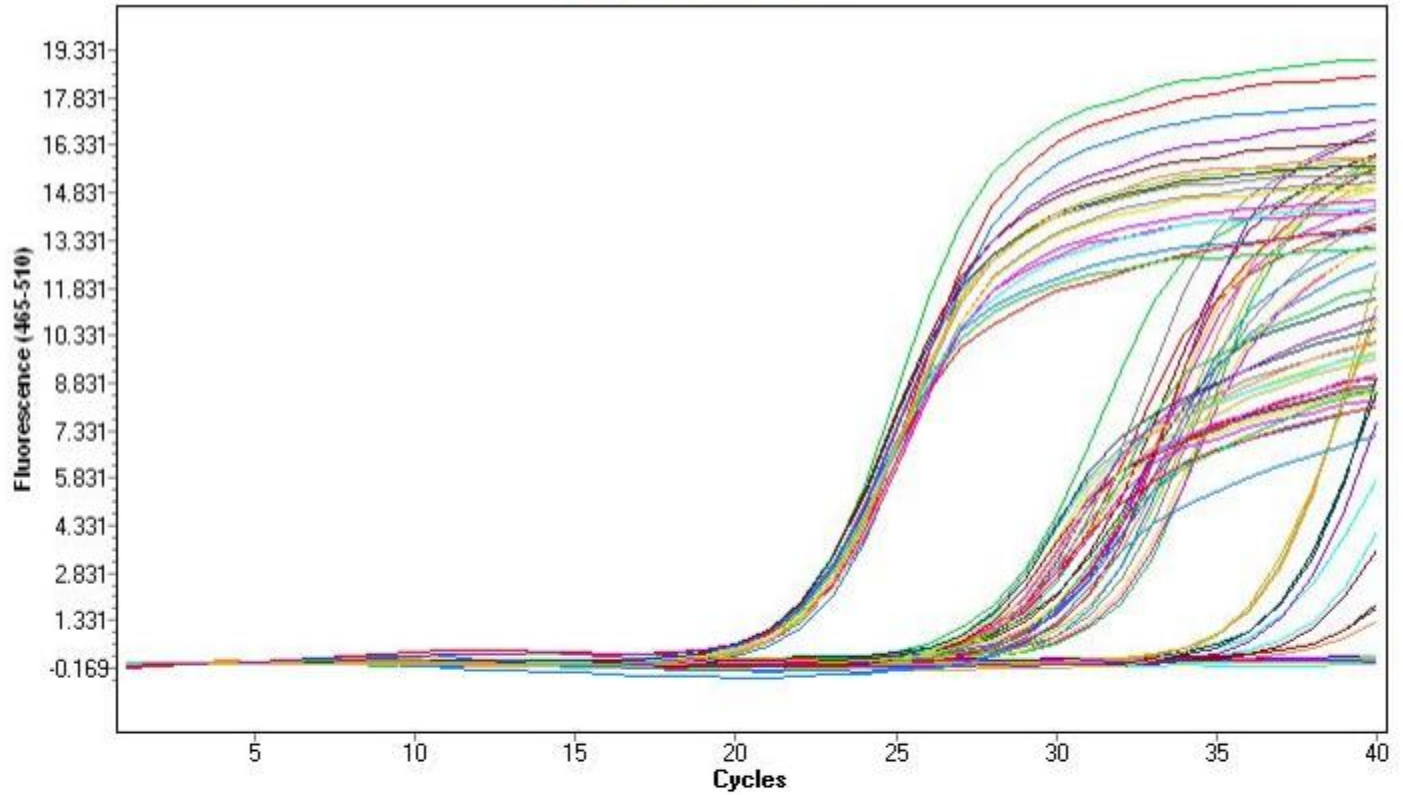

### Standard Curve

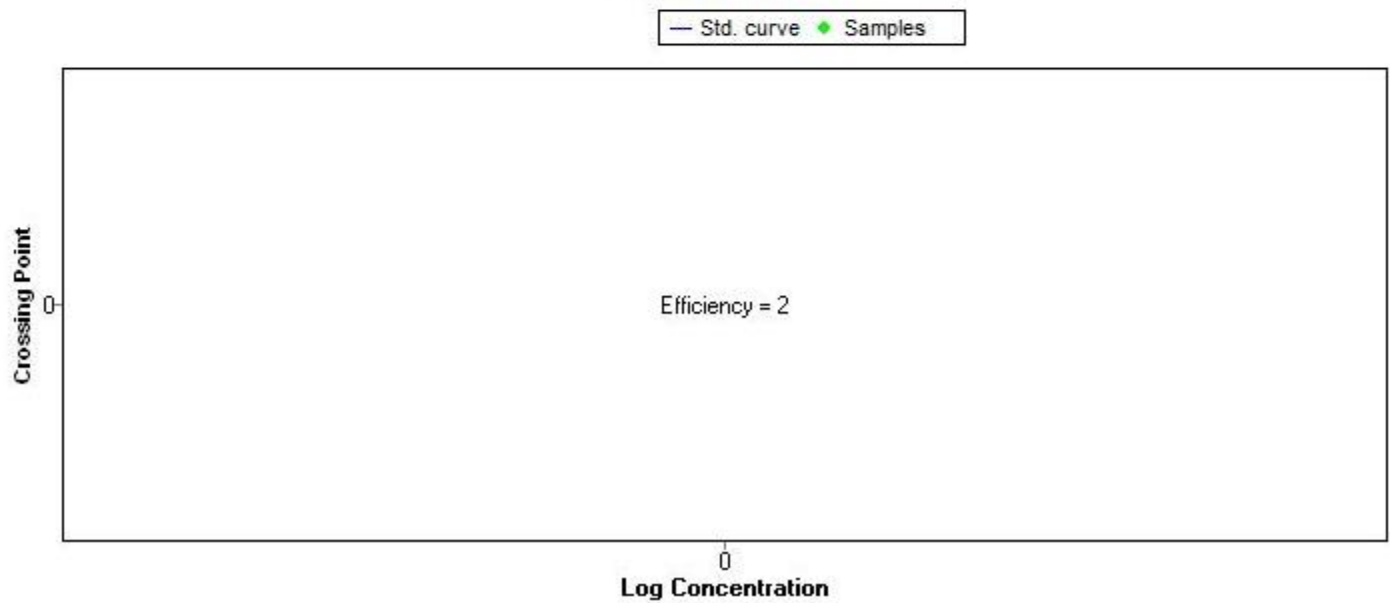

### Analysis Notes

**Abs Quant/Fit Points for All Samples (Abs Quant/Fit Points)**



## Settings

|                    |                       |                  |        |                    |         |  |
|--------------------|-----------------------|------------------|--------|--------------------|---------|--|
| Channel            | 465-510               |                  |        |                    |         |  |
| Color Compensation | Off                   |                  |        |                    |         |  |
| Standard Curve     | Set Efficiency (2.00) |                  |        |                    |         |  |
| Program            | Program               |                  |        |                    | Units   |  |
| First Cycle        | 1                     | Last Cycle       | 40     | Background         | 2-6     |  |
| Noiseband Method   | Auto                  | Noiseband        | 0.8427 | STD Dev Multiplier | 12.0000 |  |
| # of Fit Points    | 2                     | Threshold Method | Auto   | Threshold          | 0.8427  |  |

|             |             |
|-------------|-------------|
| Subset Name | All Samples |
|-------------|-------------|

## Results

| Inc                                 | Pos | Name      | Type    | CP    | Concentration | Standard | Status |
|-------------------------------------|-----|-----------|---------|-------|---------------|----------|--------|
| <input checked="" type="checkbox"/> | A1  | GAPDH 15  | Unknown |       |               |          |        |
| <input checked="" type="checkbox"/> | A2  | GAPDH 15  | Unknown |       |               |          |        |
| <input checked="" type="checkbox"/> | A3  | GAPDH 15  | Unknown |       |               |          |        |
| <input checked="" type="checkbox"/> | A4  | GAPDH 18  | Unknown |       |               |          |        |
| <input checked="" type="checkbox"/> | A5  | GAPDH 18  | Unknown |       |               |          |        |
| <input checked="" type="checkbox"/> | A6  | GAPDH 18  | Unknown |       |               |          |        |
| <input checked="" type="checkbox"/> | A7  | GAPDH 19  | Unknown |       |               |          |        |
| <input checked="" type="checkbox"/> | A8  | GAPDH 19  | Unknown |       |               |          |        |
| <input checked="" type="checkbox"/> | A9  | GAPDH 19  | Unknown |       |               |          |        |
| <input checked="" type="checkbox"/> | A10 | GAPDH 20  | Unknown |       |               |          |        |
| <input checked="" type="checkbox"/> | A11 | GAPDH 20  | Unknown |       |               |          |        |
| <input checked="" type="checkbox"/> | A12 | GAPDH 20  | Unknown |       |               |          |        |
| <input checked="" type="checkbox"/> | B1  | FCER1A 15 | Unknown |       |               |          |        |
| <input checked="" type="checkbox"/> | B2  | FCER1A 15 | Unknown |       |               |          |        |
| <input checked="" type="checkbox"/> | B3  | FCER1A 15 | Unknown |       |               |          |        |
| <input checked="" type="checkbox"/> | B4  | FCER1A 18 | Unknown |       |               |          |        |
| <input checked="" type="checkbox"/> | B5  | FCER1A 18 | Unknown |       |               |          |        |
| <input checked="" type="checkbox"/> | B6  | FCER1A 18 | Unknown |       |               |          |        |
| <input checked="" type="checkbox"/> | B7  | FCER1A 19 | Unknown |       |               |          |        |
| <input checked="" type="checkbox"/> | B8  | FCER1A 19 | Unknown |       |               |          |        |
| <input checked="" type="checkbox"/> | B9  | FCER1A 19 | Unknown |       |               |          |        |
| <input checked="" type="checkbox"/> | B10 | FCER1A 20 | Unknown |       |               |          |        |
| <input checked="" type="checkbox"/> | B11 | FCER1A 20 | Unknown |       |               |          |        |
| <input checked="" type="checkbox"/> | B12 | FCER1A 20 | Unknown |       |               |          |        |
| <input checked="" type="checkbox"/> | C1  | RGS1 15   | Unknown | 26.86 |               |          |        |
| <input checked="" type="checkbox"/> | C2  | RGS1 15   | Unknown | 24.87 |               |          |        |
| <input checked="" type="checkbox"/> | C3  | RGS1 15   | Unknown | 24.67 |               |          |        |

## Results

| Inc                                 | Pos | Name      | Type    | CP    | Concentration | Standard | Status |
|-------------------------------------|-----|-----------|---------|-------|---------------|----------|--------|
| <input checked="" type="checkbox"/> | C4  | RGS1 18   | Unknown | 26.12 |               |          |        |
| <input checked="" type="checkbox"/> | C5  | RGS1 18   | Unknown | 25.25 |               |          |        |
| <input checked="" type="checkbox"/> | C6  | RGS1 18   | Unknown | 26.15 |               |          |        |
| <input checked="" type="checkbox"/> | C7  | RGS1 19   | Unknown | 25.61 |               |          |        |
| <input checked="" type="checkbox"/> | C8  | RGS1 19   | Unknown | 35.51 |               |          |        |
| <input checked="" type="checkbox"/> | C9  | RGS1 19   | Unknown | 24.32 |               |          |        |
| <input checked="" type="checkbox"/> | C10 | RGS1 20   | Unknown | 26.97 |               |          |        |
| <input checked="" type="checkbox"/> | C11 | RGS1 20   | Unknown | 26.79 |               |          |        |
| <input checked="" type="checkbox"/> | C12 | RGS1 20   | Unknown | 27.90 |               |          |        |
| <input checked="" type="checkbox"/> | D1  | GAPDH 24  | Unknown | 28.57 |               |          |        |
| <input checked="" type="checkbox"/> | D2  | GAPDH 24  | Unknown | 27.64 |               |          |        |
| <input checked="" type="checkbox"/> | D3  | GAPDH 24  | Unknown | 28.72 |               |          |        |
| <input checked="" type="checkbox"/> | D4  | GAPDH 26  | Unknown | 28.51 |               |          |        |
| <input checked="" type="checkbox"/> | D5  | GAPDH 26  | Unknown | 27.49 |               |          |        |
| <input checked="" type="checkbox"/> | D6  | GAPDH 26  | Unknown | 28.33 |               |          |        |
| <input checked="" type="checkbox"/> | D7  |           | Unknown |       |               |          |        |
| <input checked="" type="checkbox"/> | D8  |           | Unknown | 33.84 |               |          |        |
| <input checked="" type="checkbox"/> | D9  |           | Unknown | 35.93 |               |          |        |
| <input checked="" type="checkbox"/> | D10 |           | Unknown | 36.99 |               |          |        |
| <input checked="" type="checkbox"/> | D11 |           | Unknown |       |               |          |        |
| <input checked="" type="checkbox"/> | D12 |           | Unknown |       |               |          |        |
| <input checked="" type="checkbox"/> | E1  | FCER1A 24 | Unknown | 20.26 |               |          |        |
| <input checked="" type="checkbox"/> | E2  | FCER1A 24 | Unknown | 19.68 |               |          |        |
| <input checked="" type="checkbox"/> | E3  | FCER1A 24 | Unknown | 18.85 |               |          |        |
| <input checked="" type="checkbox"/> | E4  | FCER1A 26 | Unknown | 19.48 |               |          |        |
| <input checked="" type="checkbox"/> | E5  | FCER1A 26 | Unknown | 19.33 |               |          |        |
| <input checked="" type="checkbox"/> | E6  | FCER1A 26 | Unknown | 19.35 |               |          |        |
| <input checked="" type="checkbox"/> | E7  |           | Unknown | 36.10 |               |          |        |
| <input checked="" type="checkbox"/> | E8  |           | Unknown |       |               |          |        |
| <input checked="" type="checkbox"/> | E9  |           | Unknown | 33.50 |               |          |        |
| <input checked="" type="checkbox"/> | E10 |           | Unknown |       |               |          |        |
| <input checked="" type="checkbox"/> | E11 |           | Unknown |       |               |          |        |
| <input checked="" type="checkbox"/> | E12 |           | Unknown | 32.99 |               |          |        |
| <input checked="" type="checkbox"/> | F1  | RGS1 24   | Unknown | 27.89 |               |          |        |
| <input checked="" type="checkbox"/> | F2  | RGS1 24   | Unknown | 27.47 |               |          |        |
| <input checked="" type="checkbox"/> | F3  | RGS1 24   | Unknown | 26.29 |               |          |        |
| <input checked="" type="checkbox"/> | F4  | RGS1 26   | Unknown | 25.97 |               |          |        |

---

**Results**

| Inc                                 | Pos | Name    | Type    | CP    | Concentration | Standard | Status |
|-------------------------------------|-----|---------|---------|-------|---------------|----------|--------|
| <input checked="" type="checkbox"/> | F5  | RGS1 26 | Unknown | 25.96 |               |          |        |
| <input checked="" type="checkbox"/> | F6  | RGS1 26 | Unknown | 25.94 |               |          |        |
| <input checked="" type="checkbox"/> | F7  |         | Unknown | 36.31 |               |          |        |
| <input checked="" type="checkbox"/> | F8  |         | Unknown |       |               |          |        |
| <input checked="" type="checkbox"/> | F9  |         | Unknown | 34.40 |               |          |        |
| <input checked="" type="checkbox"/> | F10 |         | Unknown | 33.30 |               |          |        |
| <input checked="" type="checkbox"/> | F11 |         | Unknown | 34.86 |               |          |        |
| <input checked="" type="checkbox"/> | F12 |         | Unknown | 33.82 |               |          |        |
| <input checked="" type="checkbox"/> | G1  |         | Unknown | 28.35 |               |          |        |
| <input checked="" type="checkbox"/> | G2  |         | Unknown | 25.96 |               |          |        |
| <input checked="" type="checkbox"/> | G3  |         | Unknown | 26.65 |               |          |        |
| <input checked="" type="checkbox"/> | G4  |         | Unknown | 25.80 |               |          |        |
| <input checked="" type="checkbox"/> | G5  |         | Unknown | 24.91 |               |          |        |
| <input checked="" type="checkbox"/> | G6  |         | Unknown | 25.72 |               |          |        |
| <input checked="" type="checkbox"/> | G7  |         | Unknown | 25.92 |               |          |        |
| <input checked="" type="checkbox"/> | G8  |         | Unknown | 25.61 |               |          |        |
| <input checked="" type="checkbox"/> | G9  |         | Unknown | 25.36 |               |          |        |
| <input checked="" type="checkbox"/> | G10 |         | Unknown | 25.81 |               |          |        |
| <input checked="" type="checkbox"/> | G11 |         | Unknown | 26.27 |               |          |        |
| <input checked="" type="checkbox"/> | G12 |         | Unknown | 26.28 |               |          |        |
| <input checked="" type="checkbox"/> | H1  |         | Unknown | 19.18 |               |          |        |
| <input checked="" type="checkbox"/> | H2  |         | Unknown | 8.60  |               |          |        |
| <input checked="" type="checkbox"/> | H3  |         | Unknown | 19.60 |               |          |        |
| <input checked="" type="checkbox"/> | H4  |         | Unknown | 19.72 |               |          |        |
| <input checked="" type="checkbox"/> | H5  |         | Unknown | 18.91 |               |          |        |
| <input checked="" type="checkbox"/> | H6  |         | Unknown | 19.44 |               |          |        |
| <input checked="" type="checkbox"/> | H7  |         | Unknown | 18.70 |               |          |        |
| <input checked="" type="checkbox"/> | H8  |         | Unknown | 18.96 |               |          |        |
| <input checked="" type="checkbox"/> | H9  |         | Unknown | 18.89 |               |          |        |
| <input checked="" type="checkbox"/> | H10 |         | Unknown | 19.60 |               |          |        |
| <input checked="" type="checkbox"/> | H11 |         | Unknown | 16.52 |               |          |        |
| <input checked="" type="checkbox"/> | H12 |         | Unknown | 20.23 |               |          |        |

**Amplification Curves**

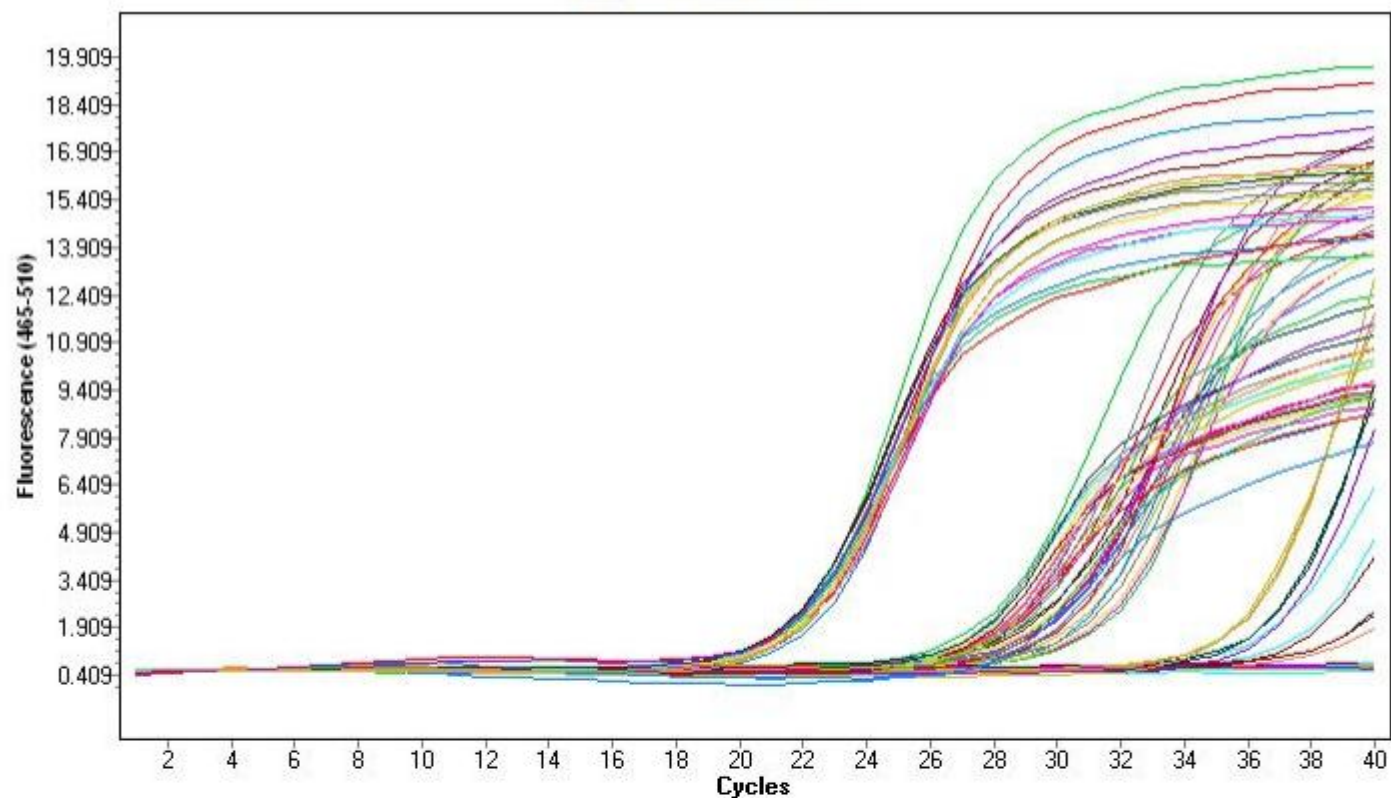

**Amplification Curves**

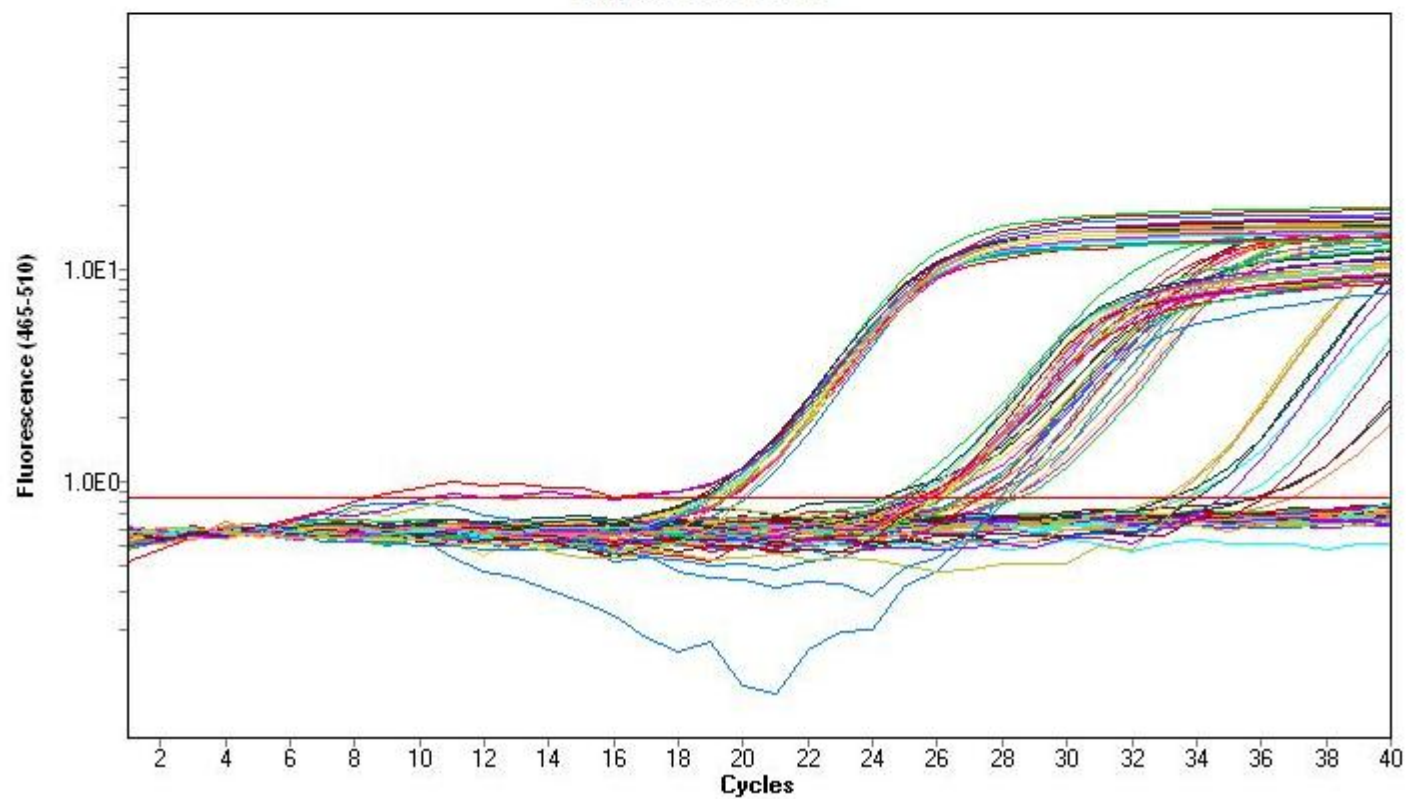

### Amplification Curves

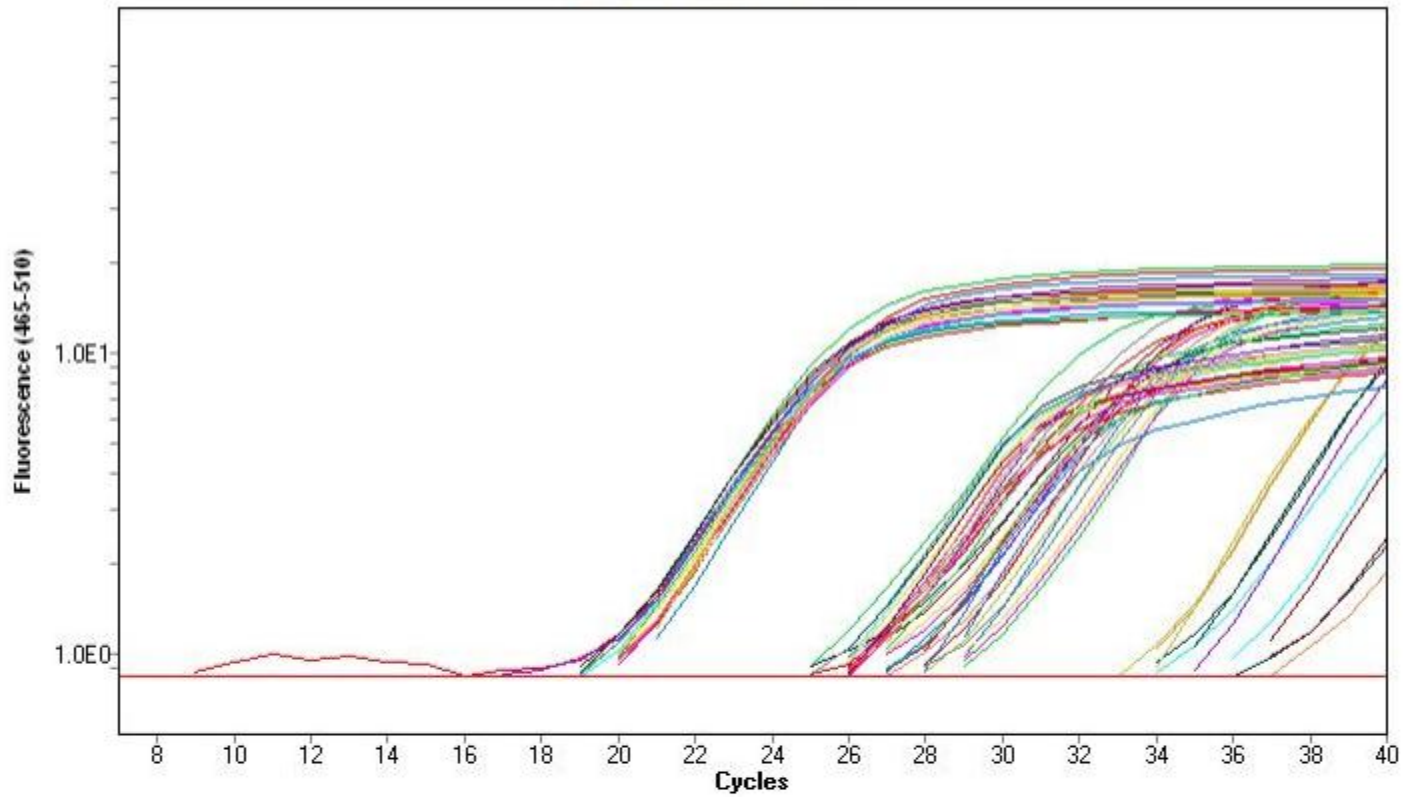

### Standard Curve



### Analysis Notes

### Gene Scanning for All Samples (Gene Scanning)

|               |             |                     |             |
|---------------|-------------|---------------------|-------------|
| Channel       | 465-510     | Color Compensation  | Off         |
| Program Name  | Program     |                     |             |
| Stds Settings | Auto-Group  |                     |             |
| Sensitivity   | 0.30        | Threshold (TmShift) | 5.000       |
| Pre-melt      | 69.75-70.74 | Post-melt Temp      | 88.22-89.21 |

|             |             |
|-------------|-------------|
| Subset Name | All Samples |
|-------------|-------------|

## Results

| Inc                                 | Pos. | Sample Name | Sample Type | Group    | Status |
|-------------------------------------|------|-------------|-------------|----------|--------|
| <input checked="" type="checkbox"/> | A1   | GAPDH 15    | Unknown     | Negative |        |
| <input checked="" type="checkbox"/> | A2   | GAPDH 15    | Unknown     | Negative |        |
| <input checked="" type="checkbox"/> | A3   | GAPDH 15    | Unknown     | Negative |        |
| <input checked="" type="checkbox"/> | A4   | GAPDH 18    | Unknown     | Negative |        |
| <input checked="" type="checkbox"/> | A5   | GAPDH 18    | Unknown     | Negative |        |
| <input checked="" type="checkbox"/> | A6   | GAPDH 18    | Unknown     | Negative |        |
| <input checked="" type="checkbox"/> | A7   | GAPDH 19    | Unknown     | Negative |        |
| <input checked="" type="checkbox"/> | A8   | GAPDH 19    | Unknown     | Negative |        |
| <input checked="" type="checkbox"/> | A9   | GAPDH 19    | Unknown     | Negative |        |
| <input checked="" type="checkbox"/> | A10  | GAPDH 20    | Unknown     | Negative |        |
| <input checked="" type="checkbox"/> | A11  | GAPDH 20    | Unknown     | Negative |        |
| <input checked="" type="checkbox"/> | A12  | GAPDH 20    | Unknown     | Negative |        |
| <input checked="" type="checkbox"/> | B1   | FCER1A 15   | Unknown     | Negative |        |
| <input checked="" type="checkbox"/> | B2   | FCER1A 15   | Unknown     | Negative |        |
| <input checked="" type="checkbox"/> | B3   | FCER1A 15   | Unknown     | Negative |        |
| <input checked="" type="checkbox"/> | B4   | FCER1A 18   | Unknown     | Negative |        |
| <input checked="" type="checkbox"/> | B5   | FCER1A 18   | Unknown     | Negative |        |
| <input checked="" type="checkbox"/> | B6   | FCER1A 18   | Unknown     | Negative |        |
| <input checked="" type="checkbox"/> | B7   | FCER1A 19   | Unknown     | Negative |        |
| <input checked="" type="checkbox"/> | B8   | FCER1A 19   | Unknown     | Negative |        |
| <input checked="" type="checkbox"/> | B9   | FCER1A 19   | Unknown     | Negative |        |
| <input checked="" type="checkbox"/> | B10  | FCER1A 20   | Unknown     | Negative |        |
| <input checked="" type="checkbox"/> | B11  | FCER1A 20   | Unknown     | Negative |        |
| <input checked="" type="checkbox"/> | B12  | FCER1A 20   | Unknown     | Negative |        |
| <input checked="" type="checkbox"/> | C1   | RGS1 15     | Unknown     | 1        |        |
| <input checked="" type="checkbox"/> | C2   | RGS1 15     | Unknown     | Unknown  |        |
| <input checked="" type="checkbox"/> | C3   | RGS1 15     | Unknown     | 1        |        |
| <input checked="" type="checkbox"/> | C4   | RGS1 18     | Unknown     | 1        |        |
| <input checked="" type="checkbox"/> | C5   | RGS1 18     | Unknown     | Unknown  |        |
| <input checked="" type="checkbox"/> | C6   | RGS1 18     | Unknown     | 4        |        |
| <input checked="" type="checkbox"/> | C7   | RGS1 19     | Unknown     | 1        |        |

**Results**

| Inc                                 | Pos. | Sample Name | Sample Type | Group    | Status |
|-------------------------------------|------|-------------|-------------|----------|--------|
| <input checked="" type="checkbox"/> | C8   | RGS1 19     | Unknown     | Unknown  |        |
| <input checked="" type="checkbox"/> | C9   | RGS1 19     | Unknown     | 4        |        |
| <input checked="" type="checkbox"/> | C10  | RGS1 20     | Unknown     | 4        |        |
| <input checked="" type="checkbox"/> | C11  | RGS1 20     | Unknown     | Unknown  |        |
| <input checked="" type="checkbox"/> | C12  | RGS1 20     | Unknown     | 1        |        |
| <input checked="" type="checkbox"/> | D1   | GAPDH 24    | Unknown     | 3        |        |
| <input checked="" type="checkbox"/> | D2   | GAPDH 24    | Unknown     | 3        |        |
| <input checked="" type="checkbox"/> | D3   | GAPDH 24    | Unknown     | 3        |        |
| <input checked="" type="checkbox"/> | D4   | GAPDH 26    | Unknown     | 3        |        |
| <input checked="" type="checkbox"/> | D5   | GAPDH 26    | Unknown     | 3        |        |
| <input checked="" type="checkbox"/> | D6   | GAPDH 26    | Unknown     | 3        |        |
| <input checked="" type="checkbox"/> | D7   |             | Unknown     | Negative |        |
| <input checked="" type="checkbox"/> | D8   |             | Unknown     | Unknown  |        |
| <input checked="" type="checkbox"/> | D9   |             | Unknown     | Negative |        |
| <input checked="" type="checkbox"/> | D10  |             | Unknown     | Negative |        |
| <input checked="" type="checkbox"/> | D11  |             | Unknown     | Negative |        |
| <input checked="" type="checkbox"/> | D12  |             | Unknown     | Negative |        |
| <input checked="" type="checkbox"/> | E1   | FCER1A 24   | Unknown     | 1        |        |
| <input checked="" type="checkbox"/> | E2   | FCER1A 24   | Unknown     | 1        |        |
| <input checked="" type="checkbox"/> | E3   | FCER1A 24   | Unknown     | 1        |        |
| <input checked="" type="checkbox"/> | E4   | FCER1A 26   | Unknown     | 1        |        |
| <input checked="" type="checkbox"/> | E5   | FCER1A 26   | Unknown     | 1        |        |
| <input checked="" type="checkbox"/> | E6   | FCER1A 26   | Unknown     | 1        |        |
| <input checked="" type="checkbox"/> | E7   |             | Unknown     | Negative |        |
| <input checked="" type="checkbox"/> | E8   |             | Unknown     | Negative |        |
| <input checked="" type="checkbox"/> | E9   |             | Unknown     | Unknown  |        |
| <input checked="" type="checkbox"/> | E10  |             | Unknown     | Negative |        |
| <input checked="" type="checkbox"/> | E11  |             | Unknown     | Negative |        |
| <input checked="" type="checkbox"/> | E12  |             | Unknown     | Unknown  |        |
| <input checked="" type="checkbox"/> | F1   | RGS1 24     | Unknown     | 1        |        |
| <input checked="" type="checkbox"/> | F2   | RGS1 24     | Unknown     | 1        |        |
| <input checked="" type="checkbox"/> | F3   | RGS1 24     | Unknown     | 1        |        |
| <input checked="" type="checkbox"/> | F4   | RGS1 26     | Unknown     | 1        |        |
| <input checked="" type="checkbox"/> | F5   | RGS1 26     | Unknown     | 4        |        |
| <input checked="" type="checkbox"/> | F6   | RGS1 26     | Unknown     | 4        |        |
| <input checked="" type="checkbox"/> | F7   |             | Unknown     | 2        |        |
| <input checked="" type="checkbox"/> | F8   |             | Unknown     | Negative |        |
| <input checked="" type="checkbox"/> | F9   |             | Unknown     | 2        |        |



**Melting Curves**

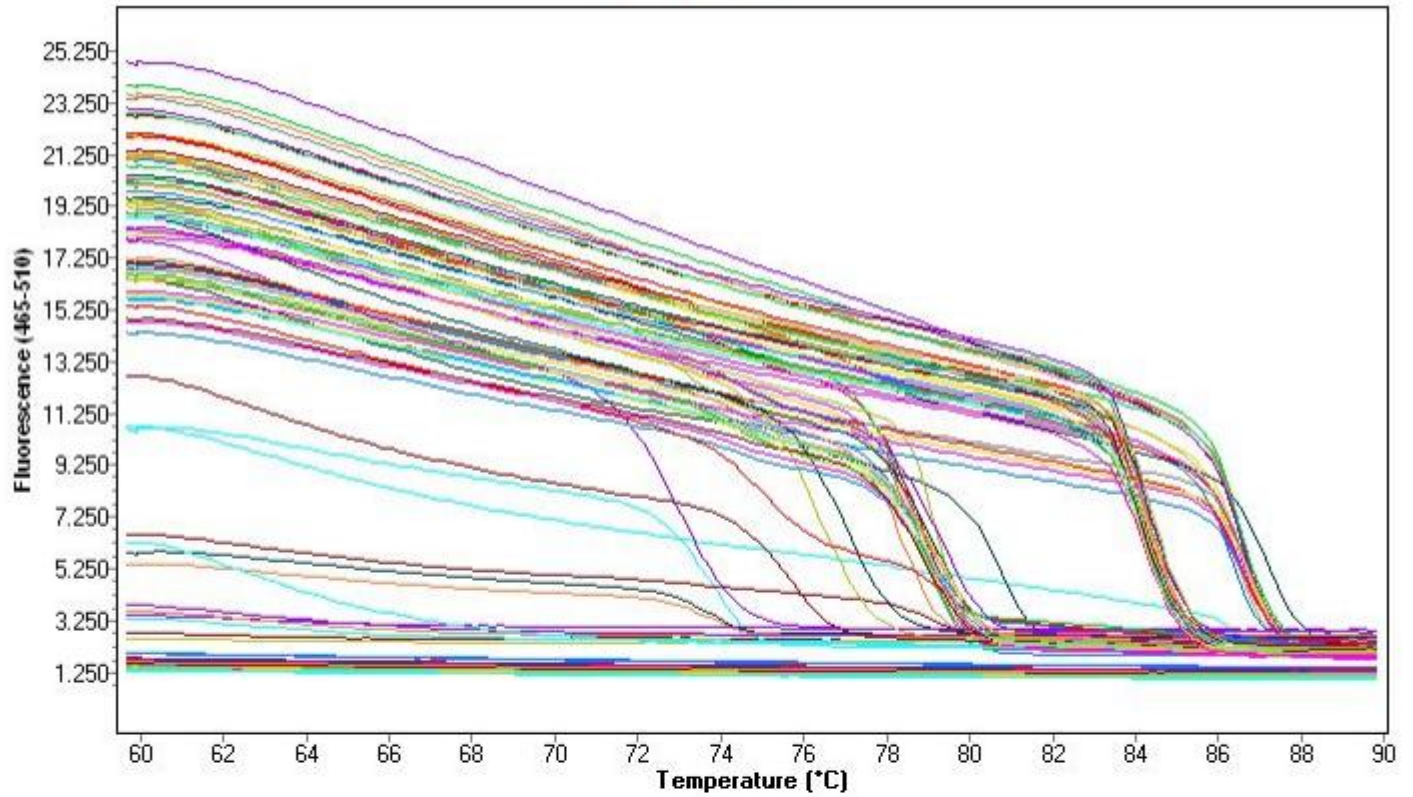

**Normalized Melting Curves**

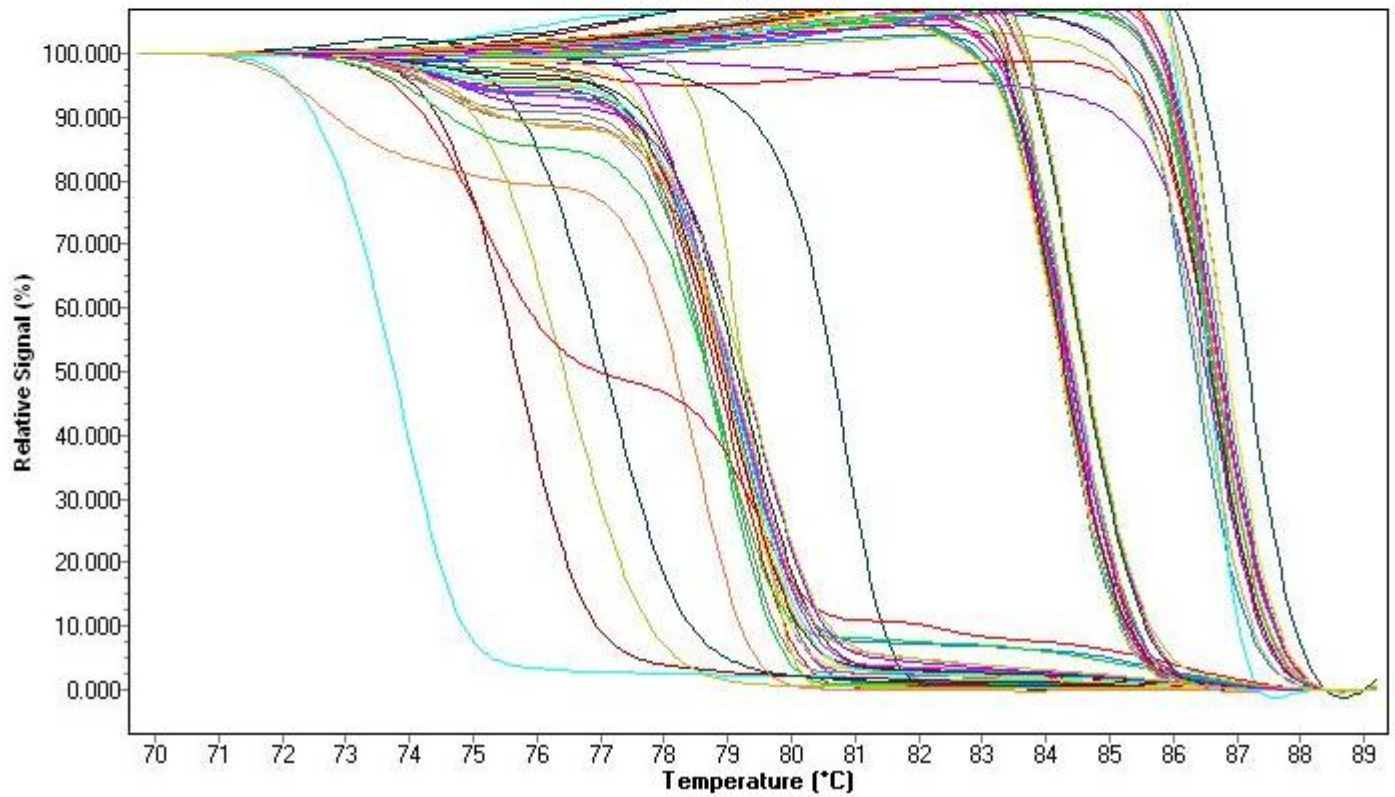



**Normalized and Shifted Melting Curves**

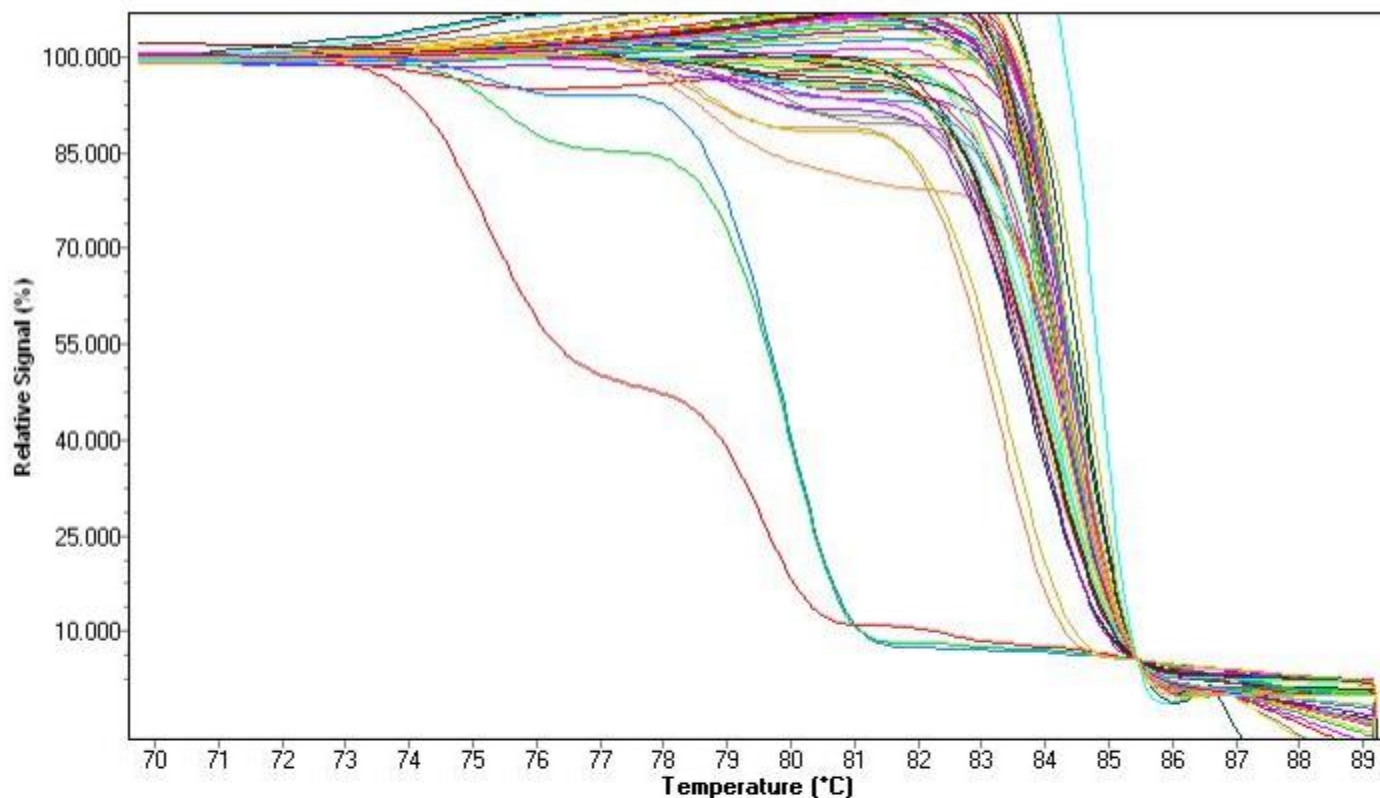

**Normalized and Temp-Shifted Difference Plot**

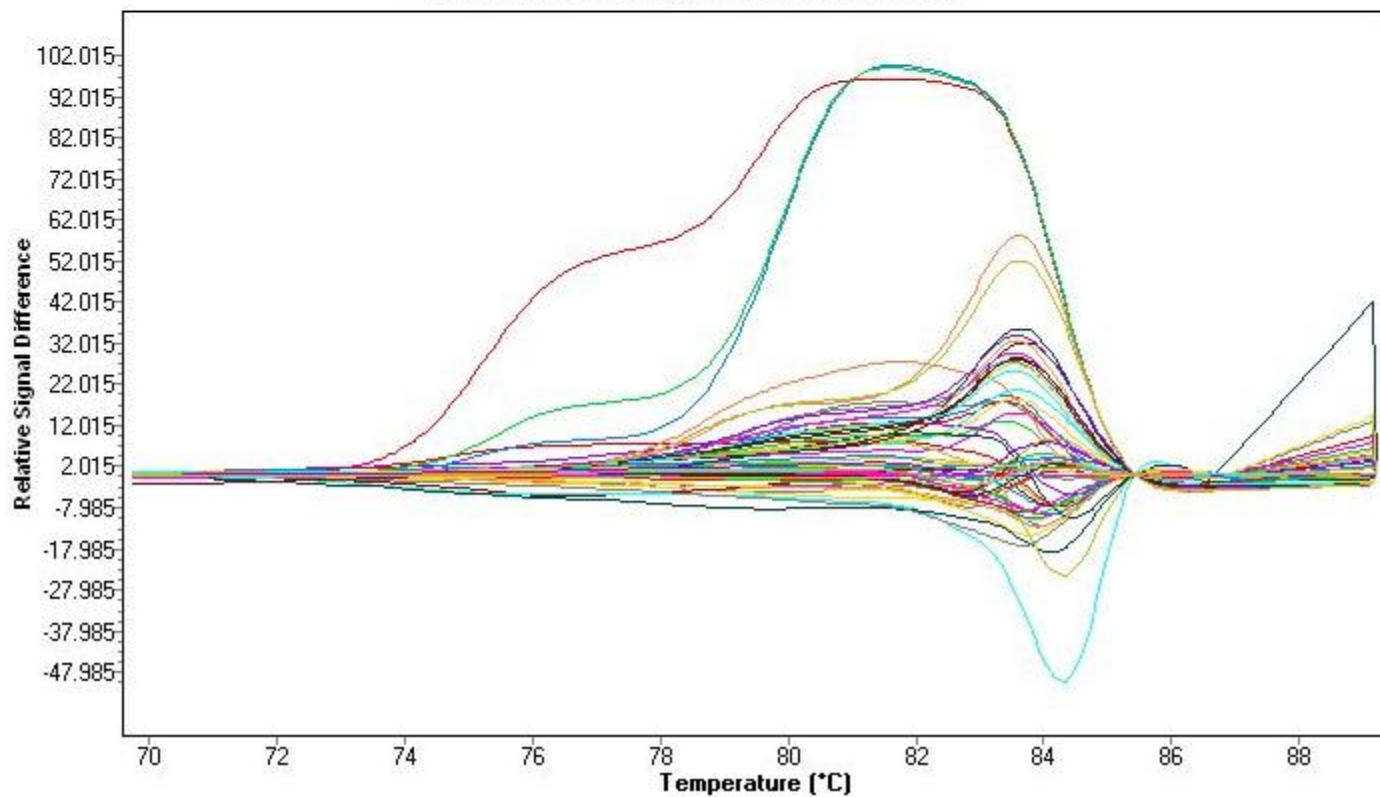

**Analysis Notes**

## Melt Curve Genotyping for All Samples (Melt Curve Genotyping)

|                |            |                    |       |
|----------------|------------|--------------------|-------|
| Channel        | 465-510    | Color Compensation | Off   |
| Program Name   | Program    |                    |       |
| Std's Settings | Auto-Group |                    |       |
| Sensitivity    | Normal     | Temp Range         | 61-86 |
| Score          | 0.7        | Res                | 0.1   |

|             |             |
|-------------|-------------|
| Subset Name | All Samples |
|-------------|-------------|

### Results

| Inc                                 | Pos. | Sample Name | Sample Type | Group    | Score | Resolution | Status |
|-------------------------------------|------|-------------|-------------|----------|-------|------------|--------|
| <input checked="" type="checkbox"/> | A1   | GAPDH 15    | Unknown     | Negative | 1.00  | 1.00       |        |
| <input checked="" type="checkbox"/> | A2   | GAPDH 15    | Unknown     | Negative | 1.00  | 1.00       |        |
| <input checked="" type="checkbox"/> | A3   | GAPDH 15    | Unknown     | Negative | 1.00  | 1.00       |        |
| <input checked="" type="checkbox"/> | A4   | GAPDH 18    | Unknown     | Negative | 1.00  | 1.00       |        |
| <input checked="" type="checkbox"/> | A5   | GAPDH 18    | Unknown     | Negative | 1.00  | 1.00       |        |
| <input checked="" type="checkbox"/> | A6   | GAPDH 18    | Unknown     | Negative | 1.00  | 1.00       |        |
| <input checked="" type="checkbox"/> | A7   | GAPDH 19    | Unknown     | Negative | 1.00  | 1.00       |        |
| <input checked="" type="checkbox"/> | A8   | GAPDH 19    | Unknown     | Negative | 1.00  | 1.00       |        |
| <input checked="" type="checkbox"/> | A9   | GAPDH 19    | Unknown     | Negative | 1.00  | 1.00       |        |
| <input checked="" type="checkbox"/> | A10  | GAPDH 20    | Unknown     | Negative | 1.00  | 1.00       |        |
| <input checked="" type="checkbox"/> | A11  | GAPDH 20    | Unknown     | Negative | 1.00  | 1.00       |        |
| <input checked="" type="checkbox"/> | A12  | GAPDH 20    | Unknown     | Negative | 1.00  | 1.00       |        |
| <input checked="" type="checkbox"/> | B1   | FCER1A 15   | Unknown     | Negative | 1.00  | 1.00       |        |
| <input checked="" type="checkbox"/> | B2   | FCER1A 15   | Unknown     | Negative | 1.00  | 1.00       |        |
| <input checked="" type="checkbox"/> | B3   | FCER1A 15   | Unknown     | Negative | 1.00  | 1.00       |        |
| <input checked="" type="checkbox"/> | B4   | FCER1A 18   | Unknown     | Negative | 1.00  | 1.00       |        |
| <input checked="" type="checkbox"/> | B5   | FCER1A 18   | Unknown     | Negative | 1.00  | 1.00       |        |
| <input checked="" type="checkbox"/> | B6   | FCER1A 18   | Unknown     | Negative | 1.00  | 1.00       |        |
| <input checked="" type="checkbox"/> | B7   | FCER1A 19   | Unknown     | Negative | 1.00  | 1.00       |        |
| <input checked="" type="checkbox"/> | B8   | FCER1A 19   | Unknown     | Negative | 1.00  | 1.00       |        |
| <input checked="" type="checkbox"/> | B9   | FCER1A 19   | Unknown     | Negative | 1.00  | 1.00       |        |
| <input checked="" type="checkbox"/> | B10  | FCER1A 20   | Unknown     | Negative | 1.00  | 1.00       |        |
| <input checked="" type="checkbox"/> | B11  | FCER1A 20   | Unknown     | Negative | 1.00  | 1.00       |        |
| <input checked="" type="checkbox"/> | B12  | FCER1A 20   | Unknown     | Negative | 1.00  | 1.00       |        |
| <input checked="" type="checkbox"/> | C1   | RGS1 15     | Unknown     | 1        | 1.00  | 0.69       |        |
| <input checked="" type="checkbox"/> | C2   | RGS1 15     | Unknown     | 1        | 0.98  | 0.49       |        |
| <input checked="" type="checkbox"/> | C3   | RGS1 15     | Unknown     | 1        | 0.99  | 0.63       |        |
| <input checked="" type="checkbox"/> | C4   | RGS1 18     | Unknown     | 1        | 0.99  | 0.66       |        |
| <input checked="" type="checkbox"/> | C5   | RGS1 18     | Unknown     | 1        | 0.99  | 0.67       |        |
| <input checked="" type="checkbox"/> | C6   | RGS1 18     | Unknown     | 1        | 0.99  | 0.63       |        |
| <input checked="" type="checkbox"/> | C7   | RGS1 19     | Unknown     | 1        | 0.98  | 0.77       |        |

## Results

| Inc                                 | Pos. | Sample Name | Sample Type | Group    | Score | Resolution | Status |
|-------------------------------------|------|-------------|-------------|----------|-------|------------|--------|
| <input checked="" type="checkbox"/> | C8   | RGS1 19     | Unknown     | 1        | 0.72  | 0.52       |        |
| <input checked="" type="checkbox"/> | C9   | RGS1 19     | Unknown     | 1        | 0.99  | 0.54       |        |
| <input checked="" type="checkbox"/> | C10  | RGS1 20     | Unknown     | 1        | 0.98  | 0.62       |        |
| <input checked="" type="checkbox"/> | C11  | RGS1 20     | Unknown     | 1        | 0.98  | 0.61       |        |
| <input checked="" type="checkbox"/> | C12  | RGS1 20     | Unknown     | 1        | 0.99  | 0.64       |        |
| <input checked="" type="checkbox"/> | D1   | GAPDH 24    | Unknown     | 2        | 0.98  | 0.60       |        |
| <input checked="" type="checkbox"/> | D2   | GAPDH 24    | Unknown     | 2        | 0.96  | 0.60       |        |
| <input checked="" type="checkbox"/> | D3   | GAPDH 24    | Unknown     | 2        | 0.93  | 0.61       |        |
| <input checked="" type="checkbox"/> | D4   | GAPDH 26    | Unknown     | 2        | 0.92  | 0.64       |        |
| <input checked="" type="checkbox"/> | D5   | GAPDH 26    | Unknown     | 2        | 0.99  | 0.51       |        |
| <input checked="" type="checkbox"/> | D6   | GAPDH 26    | Unknown     | 2        | 0.96  | 0.61       |        |
| <input checked="" type="checkbox"/> | D7   |             | Unknown     | Unknown  | 0.24  | 0.10       |        |
| <input checked="" type="checkbox"/> | D8   |             | Unknown     | 3        | 0.83  | 0.66       |        |
| <input checked="" type="checkbox"/> | D9   |             | Unknown     | 3        | 1.00  | 0.79       |        |
| <input checked="" type="checkbox"/> | D10  |             | Unknown     | 3        | 0.99  | 0.78       |        |
| <input checked="" type="checkbox"/> | D11  |             | Unknown     | 6        | 1.00  | 0.42       |        |
| <input checked="" type="checkbox"/> | D12  |             | Unknown     | Negative | 1.00  | 1.00       |        |
| <input checked="" type="checkbox"/> | E1   | FCER1A 24   | Unknown     | 1        | 0.72  | 0.71       |        |
| <input checked="" type="checkbox"/> | E2   | FCER1A 24   | Unknown     | 1        | 0.76  | 0.76       |        |
| <input checked="" type="checkbox"/> | E3   | FCER1A 24   | Unknown     | 1        | 0.78  | 0.77       |        |
| <input checked="" type="checkbox"/> | E4   | FCER1A 26   | Unknown     | 1        | 0.83  | 0.82       |        |
| <input checked="" type="checkbox"/> | E5   | FCER1A 26   | Unknown     | 1        | 0.82  | 0.81       |        |
| <input checked="" type="checkbox"/> | E6   | FCER1A 26   | Unknown     | 1        | 0.83  | 0.82       |        |
| <input checked="" type="checkbox"/> | E7   |             | Unknown     | Unknown  | 0.60  | 0.01       |        |
| <input checked="" type="checkbox"/> | E8   |             | Unknown     | Unknown  | 0.68  | 0.45       |        |
| <input checked="" type="checkbox"/> | E9   |             | Unknown     | 2        | 0.86  | 0.60       |        |
| <input checked="" type="checkbox"/> | E10  |             | Unknown     | 4        | 0.88  | 0.15       |        |
| <input checked="" type="checkbox"/> | E11  |             | Unknown     | 4        | 0.98  | 0.45       |        |
| <input checked="" type="checkbox"/> | E12  |             | Unknown     | 2        | 0.91  | 0.64       |        |
| <input checked="" type="checkbox"/> | F1   | RGS1 24     | Unknown     | 1        | 0.98  | 0.55       |        |
| <input checked="" type="checkbox"/> | F2   | RGS1 24     | Unknown     | 1        | 0.99  | 0.61       |        |
| <input checked="" type="checkbox"/> | F3   | RGS1 24     | Unknown     | 1        | 0.97  | 0.63       |        |
| <input checked="" type="checkbox"/> | F4   | RGS1 26     | Unknown     | 1        | 0.98  | 0.59       |        |
| <input checked="" type="checkbox"/> | F5   | RGS1 26     | Unknown     | 1        | 0.97  | 0.60       |        |
| <input checked="" type="checkbox"/> | F6   | RGS1 26     | Unknown     | 1        | 0.98  | 0.58       |        |
| <input checked="" type="checkbox"/> | F7   |             | Unknown     | Unknown  | 0.66  | 0.14       |        |
| <input checked="" type="checkbox"/> | F8   |             | Unknown     | 4        | 1.00  | 0.42       |        |
| <input checked="" type="checkbox"/> | F9   |             | Unknown     | 2        | 0.73  | 0.16       |        |

## Results

| Inc                                 | Pos. | Sample Name | Sample Type | Group   | Score | Resolution | Status |
|-------------------------------------|------|-------------|-------------|---------|-------|------------|--------|
| <input checked="" type="checkbox"/> | F10  |             | Unknown     | 2       | 0.77  | 0.12       |        |
| <input checked="" type="checkbox"/> | F11  |             | Unknown     | 3       | 0.92  | 0.82       |        |
| <input checked="" type="checkbox"/> | F12  |             | Unknown     | Unknown | 0.51  | 0.10       |        |
| <input checked="" type="checkbox"/> | G1   |             | Unknown     | 2       | 0.98  | 0.47       |        |
| <input checked="" type="checkbox"/> | G2   |             | Unknown     | 5       | 1.00  | 0.52       |        |
| <input checked="" type="checkbox"/> | G3   |             | Unknown     | 2       | 0.94  | 0.27       |        |
| <input checked="" type="checkbox"/> | G4   |             | Unknown     | 2       | 0.98  | 0.59       |        |
| <input checked="" type="checkbox"/> | G5   |             | Unknown     | 2       | 1.00  | 0.52       |        |
| <input checked="" type="checkbox"/> | G6   |             | Unknown     | 2       | 0.98  | 0.58       |        |
| <input checked="" type="checkbox"/> | G7   |             | Unknown     | 2       | 0.96  | 0.61       |        |
| <input checked="" type="checkbox"/> | G8   |             | Unknown     | 2       | 0.97  | 0.60       |        |
| <input checked="" type="checkbox"/> | G9   |             | Unknown     | 2       | 0.98  | 0.62       |        |
| <input checked="" type="checkbox"/> | G10  |             | Unknown     | 2       | 0.98  | 0.43       |        |
| <input checked="" type="checkbox"/> | G11  |             | Unknown     | 2       | 0.99  | 0.56       |        |
| <input checked="" type="checkbox"/> | G12  |             | Unknown     | 2       | 0.97  | 0.42       |        |
| <input checked="" type="checkbox"/> | H1   |             | Unknown     | 1       | 0.74  | 0.73       |        |
| <input checked="" type="checkbox"/> | H2   |             | Unknown     | 1       | 0.72  | 0.71       |        |
| <input checked="" type="checkbox"/> | H3   |             | Unknown     | 1       | 0.71  | 0.71       |        |
| <input checked="" type="checkbox"/> | H4   |             | Unknown     | 1       | 0.71  | 0.71       |        |
| <input checked="" type="checkbox"/> | H5   |             | Unknown     | Unknown | 0.64  | 0.64       |        |
| <input checked="" type="checkbox"/> | H6   |             | Unknown     | 1       | 0.71  | 0.71       |        |
| <input checked="" type="checkbox"/> | H7   |             | Unknown     | 1       | 0.74  | 0.73       |        |
| <input checked="" type="checkbox"/> | H8   |             | Unknown     | 1       | 0.74  | 0.74       |        |
| <input checked="" type="checkbox"/> | H9   |             | Unknown     | 1       | 0.81  | 0.81       |        |
| <input checked="" type="checkbox"/> | H10  |             | Unknown     | 1       | 0.73  | 0.73       |        |
| <input checked="" type="checkbox"/> | H11  |             | Unknown     | 1       | 0.73  | 0.73       |        |
| <input checked="" type="checkbox"/> | H12  |             | Unknown     | 1       | 0.82  | 0.81       |        |

## Group 1

| Inc                                 | Pos | Sample Name | Sample Type | Score | Resolution | Status |
|-------------------------------------|-----|-------------|-------------|-------|------------|--------|
| <input checked="" type="checkbox"/> | C1  | RGS1 15     | Unknown     | 1.00  | 0.69       |        |
| <input checked="" type="checkbox"/> | C2  | RGS1 15     | Unknown     | 0.98  | 0.49       |        |
| <input checked="" type="checkbox"/> | C3  | RGS1 15     | Unknown     | 0.99  | 0.63       |        |
| <input checked="" type="checkbox"/> | C4  | RGS1 18     | Unknown     | 0.99  | 0.66       |        |
| <input checked="" type="checkbox"/> | C5  | RGS1 18     | Unknown     | 0.99  | 0.67       |        |
| <input checked="" type="checkbox"/> | C6  | RGS1 18     | Unknown     | 0.99  | 0.63       |        |
| <input checked="" type="checkbox"/> | C7  | RGS1 19     | Unknown     | 0.98  | 0.77       |        |
| <input checked="" type="checkbox"/> | C8  | RGS1 19     | Unknown     | 0.72  | 0.52       |        |

| Group 1                             |     |             |             |       |            |        |
|-------------------------------------|-----|-------------|-------------|-------|------------|--------|
| Inc                                 | Pos | Sample Name | Sample Type | Score | Resolution | Status |
| <input checked="" type="checkbox"/> | C9  | RGS1 19     | Unknown     | 0.99  | 0.54       |        |
| <input checked="" type="checkbox"/> | C10 | RGS1 20     | Unknown     | 0.98  | 0.62       |        |
| <input checked="" type="checkbox"/> | C11 | RGS1 20     | Unknown     | 0.98  | 0.61       |        |
| <input checked="" type="checkbox"/> | C12 | RGS1 20     | Unknown     | 0.99  | 0.64       |        |
| <input checked="" type="checkbox"/> | E1  | FCER1A 24   | Unknown     | 0.72  | 0.71       |        |
| <input checked="" type="checkbox"/> | E2  | FCER1A 24   | Unknown     | 0.76  | 0.76       |        |
| <input checked="" type="checkbox"/> | E3  | FCER1A 24   | Unknown     | 0.78  | 0.77       |        |
| <input checked="" type="checkbox"/> | E4  | FCER1A 26   | Unknown     | 0.83  | 0.82       |        |
| <input checked="" type="checkbox"/> | E5  | FCER1A 26   | Unknown     | 0.82  | 0.81       |        |
| <input checked="" type="checkbox"/> | E6  | FCER1A 26   | Unknown     | 0.83  | 0.82       |        |
| <input checked="" type="checkbox"/> | F1  | RGS1 24     | Unknown     | 0.98  | 0.55       |        |
| <input checked="" type="checkbox"/> | F2  | RGS1 24     | Unknown     | 0.99  | 0.61       |        |
| <input checked="" type="checkbox"/> | F3  | RGS1 24     | Unknown     | 0.97  | 0.63       |        |
| <input checked="" type="checkbox"/> | F4  | RGS1 26     | Unknown     | 0.98  | 0.59       |        |
| <input checked="" type="checkbox"/> | F5  | RGS1 26     | Unknown     | 0.97  | 0.60       |        |
| <input checked="" type="checkbox"/> | F6  | RGS1 26     | Unknown     | 0.98  | 0.58       |        |
| <input checked="" type="checkbox"/> | H1  |             | Unknown     | 0.74  | 0.73       |        |
| <input checked="" type="checkbox"/> | H2  |             | Unknown     | 0.72  | 0.71       |        |
| <input checked="" type="checkbox"/> | H3  |             | Unknown     | 0.71  | 0.71       |        |
| <input checked="" type="checkbox"/> | H4  |             | Unknown     | 0.71  | 0.71       |        |
| <input checked="" type="checkbox"/> | H6  |             | Unknown     | 0.71  | 0.71       |        |
| <input checked="" type="checkbox"/> | H7  |             | Unknown     | 0.74  | 0.73       |        |
| <input checked="" type="checkbox"/> | H8  |             | Unknown     | 0.74  | 0.74       |        |
| <input checked="" type="checkbox"/> | H9  |             | Unknown     | 0.81  | 0.81       |        |
| <input checked="" type="checkbox"/> | H10 |             | Unknown     | 0.73  | 0.73       |        |
| <input checked="" type="checkbox"/> | H11 |             | Unknown     | 0.73  | 0.73       |        |
| <input checked="" type="checkbox"/> | H12 |             | Unknown     | 0.82  | 0.81       |        |

| Group 2                             |     |             |             |       |            |        |
|-------------------------------------|-----|-------------|-------------|-------|------------|--------|
| Inc                                 | Pos | Sample Name | Sample Type | Score | Resolution | Status |
| <input checked="" type="checkbox"/> | D1  | GAPDH 24    | Unknown     | 0.98  | 0.60       |        |
| <input checked="" type="checkbox"/> | D2  | GAPDH 24    | Unknown     | 0.96  | 0.60       |        |
| <input checked="" type="checkbox"/> | D3  | GAPDH 24    | Unknown     | 0.93  | 0.61       |        |
| <input checked="" type="checkbox"/> | D4  | GAPDH 26    | Unknown     | 0.92  | 0.64       |        |
| <input checked="" type="checkbox"/> | D5  | GAPDH 26    | Unknown     | 0.99  | 0.51       |        |
| <input checked="" type="checkbox"/> | D6  | GAPDH 26    | Unknown     | 0.96  | 0.61       |        |
| <input checked="" type="checkbox"/> | E9  |             | Unknown     | 0.86  | 0.60       |        |
| <input checked="" type="checkbox"/> | E12 |             | Unknown     | 0.91  | 0.64       |        |

| Group 2                             |     |             |             |       |            |        |
|-------------------------------------|-----|-------------|-------------|-------|------------|--------|
| Inc                                 | Pos | Sample Name | Sample Type | Score | Resolution | Status |
| <input checked="" type="checkbox"/> | F9  |             | Unknown     | 0.73  | 0.16       |        |
| <input checked="" type="checkbox"/> | F10 |             | Unknown     | 0.77  | 0.12       |        |
| <input checked="" type="checkbox"/> | G1  |             | Unknown     | 0.98  | 0.47       |        |
| <input checked="" type="checkbox"/> | G3  |             | Unknown     | 0.94  | 0.27       |        |
| <input checked="" type="checkbox"/> | G4  |             | Unknown     | 0.98  | 0.59       |        |
| <input checked="" type="checkbox"/> | G5  |             | Unknown     | 1.00  | 0.52       |        |
| <input checked="" type="checkbox"/> | G6  |             | Unknown     | 0.98  | 0.58       |        |
| <input checked="" type="checkbox"/> | G7  |             | Unknown     | 0.96  | 0.61       |        |
| <input checked="" type="checkbox"/> | G8  |             | Unknown     | 0.97  | 0.60       |        |
| <input checked="" type="checkbox"/> | G9  |             | Unknown     | 0.98  | 0.62       |        |
| <input checked="" type="checkbox"/> | G10 |             | Unknown     | 0.98  | 0.43       |        |
| <input checked="" type="checkbox"/> | G11 |             | Unknown     | 0.99  | 0.56       |        |
| <input checked="" type="checkbox"/> | G12 |             | Unknown     | 0.97  | 0.42       |        |

| Group 3                             |     |             |             |       |            |        |
|-------------------------------------|-----|-------------|-------------|-------|------------|--------|
| Inc                                 | Pos | Sample Name | Sample Type | Score | Resolution | Status |
| <input checked="" type="checkbox"/> | D8  |             | Unknown     | 0.83  | 0.66       |        |
| <input checked="" type="checkbox"/> | D9  |             | Unknown     | 1.00  | 0.79       |        |
| <input checked="" type="checkbox"/> | D10 |             | Unknown     | 0.99  | 0.78       |        |
| <input checked="" type="checkbox"/> | F11 |             | Unknown     | 0.92  | 0.82       |        |

| Group 4                             |     |             |             |       |            |        |
|-------------------------------------|-----|-------------|-------------|-------|------------|--------|
| Inc                                 | Pos | Sample Name | Sample Type | Score | Resolution | Status |
| <input checked="" type="checkbox"/> | E10 |             | Unknown     | 0.88  | 0.15       |        |
| <input checked="" type="checkbox"/> | E11 |             | Unknown     | 0.98  | 0.45       |        |
| <input checked="" type="checkbox"/> | F8  |             | Unknown     | 1.00  | 0.42       |        |

| Group 5                             |     |             |             |       |            |        |
|-------------------------------------|-----|-------------|-------------|-------|------------|--------|
| Inc                                 | Pos | Sample Name | Sample Type | Score | Resolution | Status |
| <input checked="" type="checkbox"/> | G2  |             | Unknown     | 1.00  | 0.52       |        |

| Group 6                             |     |             |             |       |            |        |
|-------------------------------------|-----|-------------|-------------|-------|------------|--------|
| Inc                                 | Pos | Sample Name | Sample Type | Score | Resolution | Status |
| <input checked="" type="checkbox"/> | D11 |             | Unknown     | 1.00  | 0.42       |        |

| Group Negative |     |             |             |       |            |        |
|----------------|-----|-------------|-------------|-------|------------|--------|
| Inc            | Pos | Sample Name | Sample Type | Score | Resolution | Status |

| Group Negative                      |     |             |             |       |            |        |
|-------------------------------------|-----|-------------|-------------|-------|------------|--------|
| Inc                                 | Pos | Sample Name | Sample Type | Score | Resolution | Status |
| <input checked="" type="checkbox"/> | A1  | GAPDH 15    | Unknown     | 1.00  | 1.00       |        |
| <input checked="" type="checkbox"/> | A2  | GAPDH 15    | Unknown     | 1.00  | 1.00       |        |
| <input checked="" type="checkbox"/> | A3  | GAPDH 15    | Unknown     | 1.00  | 1.00       |        |
| <input checked="" type="checkbox"/> | A4  | GAPDH 18    | Unknown     | 1.00  | 1.00       |        |
| <input checked="" type="checkbox"/> | A5  | GAPDH 18    | Unknown     | 1.00  | 1.00       |        |
| <input checked="" type="checkbox"/> | A6  | GAPDH 18    | Unknown     | 1.00  | 1.00       |        |
| <input checked="" type="checkbox"/> | A7  | GAPDH 19    | Unknown     | 1.00  | 1.00       |        |
| <input checked="" type="checkbox"/> | A8  | GAPDH 19    | Unknown     | 1.00  | 1.00       |        |
| <input checked="" type="checkbox"/> | A9  | GAPDH 19    | Unknown     | 1.00  | 1.00       |        |
| <input checked="" type="checkbox"/> | A10 | GAPDH 20    | Unknown     | 1.00  | 1.00       |        |
| <input checked="" type="checkbox"/> | A11 | GAPDH 20    | Unknown     | 1.00  | 1.00       |        |
| <input checked="" type="checkbox"/> | A12 | GAPDH 20    | Unknown     | 1.00  | 1.00       |        |
| <input checked="" type="checkbox"/> | B1  | FCER1A 15   | Unknown     | 1.00  | 1.00       |        |
| <input checked="" type="checkbox"/> | B2  | FCER1A 15   | Unknown     | 1.00  | 1.00       |        |
| <input checked="" type="checkbox"/> | B3  | FCER1A 15   | Unknown     | 1.00  | 1.00       |        |
| <input checked="" type="checkbox"/> | B4  | FCER1A 18   | Unknown     | 1.00  | 1.00       |        |
| <input checked="" type="checkbox"/> | B5  | FCER1A 18   | Unknown     | 1.00  | 1.00       |        |
| <input checked="" type="checkbox"/> | B6  | FCER1A 18   | Unknown     | 1.00  | 1.00       |        |
| <input checked="" type="checkbox"/> | B7  | FCER1A 19   | Unknown     | 1.00  | 1.00       |        |
| <input checked="" type="checkbox"/> | B8  | FCER1A 19   | Unknown     | 1.00  | 1.00       |        |
| <input checked="" type="checkbox"/> | B9  | FCER1A 19   | Unknown     | 1.00  | 1.00       |        |
| <input checked="" type="checkbox"/> | B10 | FCER1A 20   | Unknown     | 1.00  | 1.00       |        |
| <input checked="" type="checkbox"/> | B11 | FCER1A 20   | Unknown     | 1.00  | 1.00       |        |
| <input checked="" type="checkbox"/> | B12 | FCER1A 20   | Unknown     | 1.00  | 1.00       |        |
| <input checked="" type="checkbox"/> | D12 |             | Unknown     | 1.00  | 1.00       |        |

| Group Unknown                       |     |             |             |       |            |        |
|-------------------------------------|-----|-------------|-------------|-------|------------|--------|
| Inc                                 | Pos | Sample Name | Sample Type | Score | Resolution | Status |
| <input checked="" type="checkbox"/> | D7  |             | Unknown     | 0.24  | 0.10       |        |
| <input checked="" type="checkbox"/> | E7  |             | Unknown     | 0.60  | 0.01       |        |
| <input checked="" type="checkbox"/> | E8  |             | Unknown     | 0.68  | 0.45       |        |
| <input checked="" type="checkbox"/> | F7  |             | Unknown     | 0.66  | 0.14       |        |
| <input checked="" type="checkbox"/> | F12 |             | Unknown     | 0.51  | 0.10       |        |
| <input checked="" type="checkbox"/> | H5  |             | Unknown     | 0.64  | 0.64       |        |

### Melting Curves

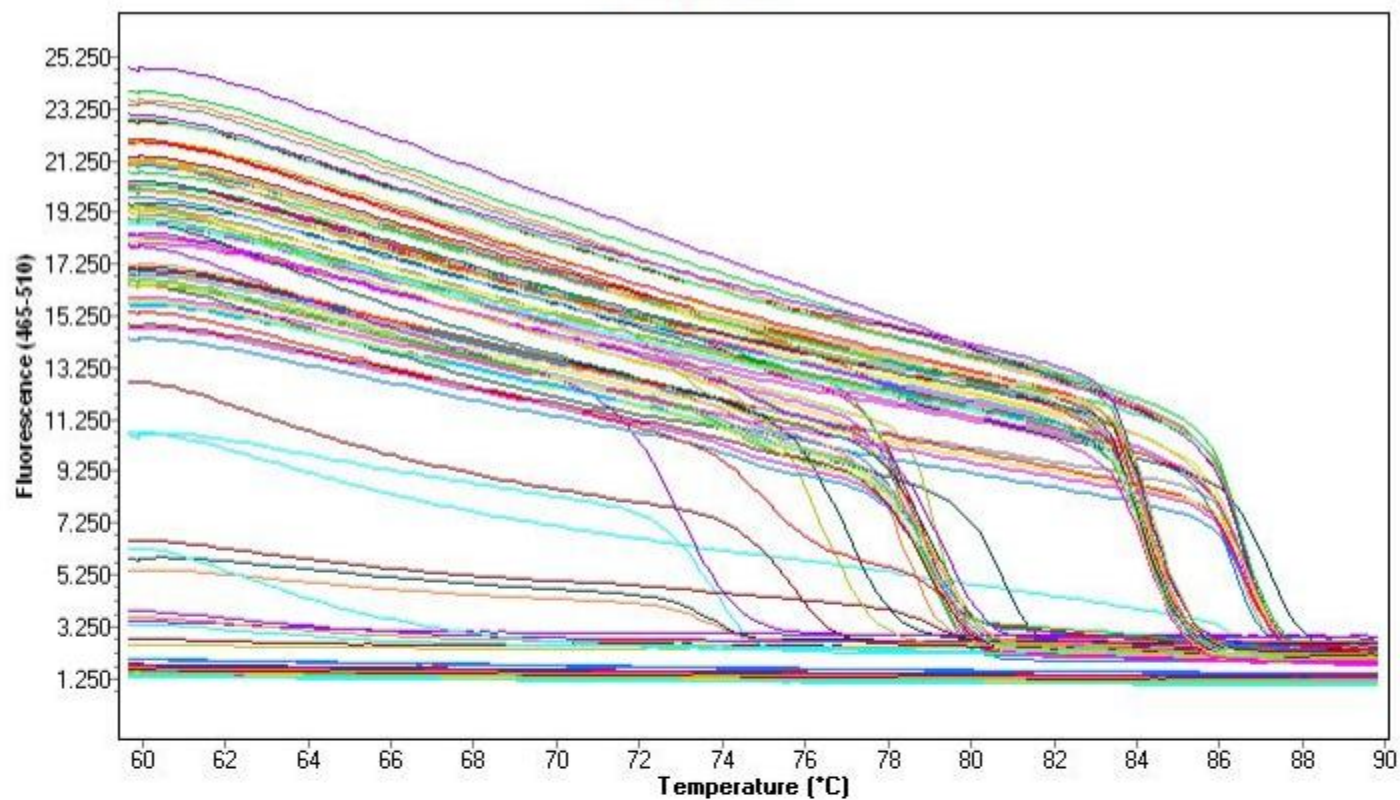

### Melting Peaks

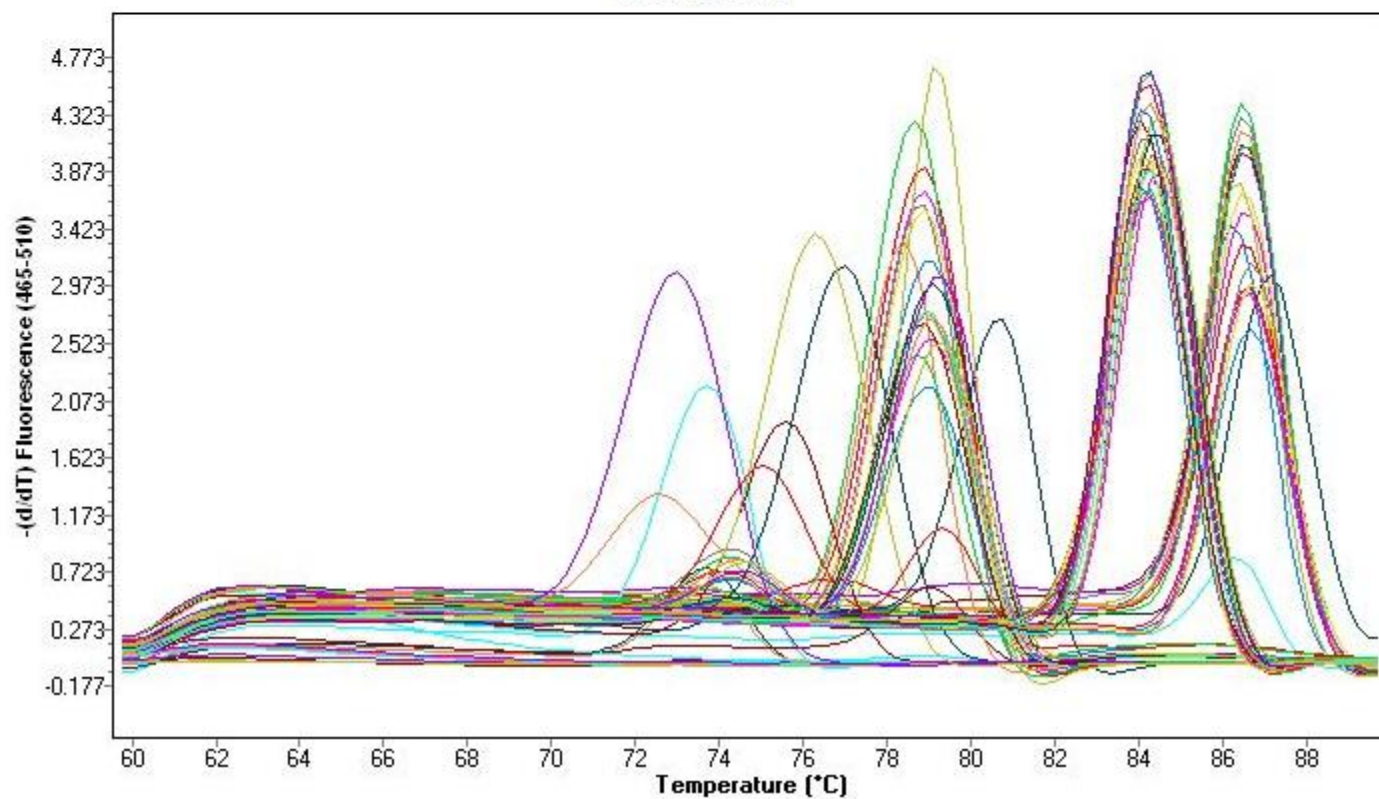

### Analysis Notes



Tm Calling for All Samples (Tm Calling)

Settings

|                |             |                    |          |
|----------------|-------------|--------------------|----------|
| Channel        | 465-510     | Color Compensation | Off      |
| Program        | Program     |                    |          |
| Show Shoulders | False       | Chemistry          | HybProbe |
|                |             | Max Peaks          | 2        |
| Subset Name    | All Samples |                    |          |

Results

| Inc                                 | Pos | Sample Name | Peak 1 |       |       |        | Peak 2 |      |       |        | Status |
|-------------------------------------|-----|-------------|--------|-------|-------|--------|--------|------|-------|--------|--------|
|                                     |     |             | Tm     | Area  | Width | Height | Tm     | Area | Width | Height |        |
| <input checked="" type="checkbox"/> | A1  | GAPDH 15    |        |       |       |        |        |      |       |        |        |
| <input checked="" type="checkbox"/> | A2  | GAPDH 15    |        |       |       |        |        |      |       |        |        |
| <input checked="" type="checkbox"/> | A3  | GAPDH 15    |        |       |       |        |        |      |       |        |        |
| <input checked="" type="checkbox"/> | A4  | GAPDH 18    |        |       |       |        |        |      |       |        |        |
| <input checked="" type="checkbox"/> | A5  | GAPDH 18    |        |       |       |        |        |      |       |        |        |
| <input checked="" type="checkbox"/> | A6  | GAPDH 18    |        |       |       |        |        |      |       |        |        |
| <input checked="" type="checkbox"/> | A7  | GAPDH 19    |        |       |       |        |        |      |       |        |        |
| <input checked="" type="checkbox"/> | A8  | GAPDH 19    |        |       |       |        |        |      |       |        |        |
| <input checked="" type="checkbox"/> | A9  | GAPDH 19    |        |       |       |        |        |      |       |        |        |
| <input checked="" type="checkbox"/> | A10 | GAPDH 20    |        |       |       |        |        |      |       |        |        |
| <input checked="" type="checkbox"/> | A11 | GAPDH 20    |        |       |       |        |        |      |       |        |        |
| <input checked="" type="checkbox"/> | A12 | GAPDH 20    |        |       |       |        |        |      |       |        |        |
| <input checked="" type="checkbox"/> | B1  | FCER1A 15   |        |       |       |        |        |      |       |        |        |
| <input checked="" type="checkbox"/> | B2  | FCER1A 15   |        |       |       |        |        |      |       |        |        |
| <input checked="" type="checkbox"/> | B3  | FCER1A 15   |        |       |       |        |        |      |       |        |        |
| <input checked="" type="checkbox"/> | B4  | FCER1A 18   |        |       |       |        |        |      |       |        |        |
| <input checked="" type="checkbox"/> | B5  | FCER1A 18   |        |       |       |        |        |      |       |        |        |
| <input checked="" type="checkbox"/> | B6  | FCER1A 18   |        |       |       |        |        |      |       |        |        |
| <input checked="" type="checkbox"/> | B7  | FCER1A 19   |        |       |       |        |        |      |       |        |        |
| <input checked="" type="checkbox"/> | B8  | FCER1A 19   |        |       |       |        |        |      |       |        |        |
| <input checked="" type="checkbox"/> | B9  | FCER1A 19   |        |       |       |        |        |      |       |        |        |
| <input checked="" type="checkbox"/> | B10 | FCER1A 20   |        |       |       |        |        |      |       |        |        |
| <input checked="" type="checkbox"/> | B11 | FCER1A 20   |        |       |       |        |        |      |       |        |        |
| <input checked="" type="checkbox"/> | B12 | FCER1A 20   |        |       |       |        |        |      |       |        |        |
| <input checked="" type="checkbox"/> | C1  | RGS1 15     | 86.38  | 7.75  | 2.20  | 3.52   |        |      |       |        |        |
| <input checked="" type="checkbox"/> | C2  | RGS1 15     | 86.65  | 8.02  | 2.38  | 3.37   |        |      |       |        |        |
| <input checked="" type="checkbox"/> | C3  | RGS1 15     | 86.60  | 10.30 | 2.28  | 4.52   |        |      |       |        |        |
| <input checked="" type="checkbox"/> | C4  | RGS1 18     | 86.66  | 9.22  | 2.49  | 3.70   |        |      |       |        |        |
| <input checked="" type="checkbox"/> | C5  | RGS1 18     | 86.60  | 10.98 | 2.49  | 4.41   |        |      |       |        |        |

## Results

| Inc                                 | Pos | Sample Name | Peak 1 |       |       |        | Peak 2 |       |       |        | Status |
|-------------------------------------|-----|-------------|--------|-------|-------|--------|--------|-------|-------|--------|--------|
|                                     |     |             | Tm     | Area  | Width | Height | Tm     | Area  | Width | Height |        |
| <input checked="" type="checkbox"/> | C6  | RGS1 18     | 86.64  | 9.54  | 2.52  | 3.79   |        |       |       |        |        |
| <input checked="" type="checkbox"/> | C7  | RGS1 19     | 86.63  | 11.15 | 2.58  | 4.32   |        |       |       |        |        |
| <input checked="" type="checkbox"/> | C8  | RGS1 19     | 86.19  | 1.82  | 3.76  | 0.48   |        |       |       |        |        |
| <input checked="" type="checkbox"/> | C9  | RGS1 19     |        |       |       |        |        |       |       |        |        |
| <input checked="" type="checkbox"/> | C10 | RGS1 20     | 86.64  | 10.43 | 2.42  | 4.31   |        |       |       |        |        |
| <input checked="" type="checkbox"/> | C11 | RGS1 20     | 86.67  | 9.44  | 2.25  | 4.19   |        |       |       |        |        |
| <input checked="" type="checkbox"/> | C12 | RGS1 20     | 86.48  | 8.60  | 2.19  | 3.92   |        |       |       |        |        |
| <input checked="" type="checkbox"/> | D1  | GAPDH 24    | 74.03  | 0.58  | 1.73  | 0.33   | 79.04  | 8.37  | 2.53  | 3.31   |        |
| <input checked="" type="checkbox"/> | D2  | GAPDH 24    | 73.82  | 0.55  | 1.72  | 0.32   | 78.89  | 10.31 | 2.53  | 4.07   |        |
| <input checked="" type="checkbox"/> | D3  | GAPDH 24    | 78.67  | 11.05 | 2.49  | 4.44   |        |       |       |        |        |
| <input checked="" type="checkbox"/> | D4  | GAPDH 26    | 78.90  | 9.25  | 2.41  | 3.84   |        |       |       |        |        |
| <input checked="" type="checkbox"/> | D5  | GAPDH 26    | 74.10  | 0.95  | 1.77  | 0.53   | 78.82  | 8.59  | 2.33  | 3.69   |        |
| <input checked="" type="checkbox"/> | D6  | GAPDH 26    | 78.92  | 9.09  | 2.45  | 3.70   |        |       |       |        |        |
| <input checked="" type="checkbox"/> | D7  |             |        |       |       |        |        |       |       |        |        |
| <input checked="" type="checkbox"/> | D8  |             | 73.73  | 5.52  | 2.44  | 2.26   |        |       |       |        |        |
| <input checked="" type="checkbox"/> | D9  |             | 73.64  | 1.87  | 2.44  | 0.77   |        |       |       |        |        |
| <input checked="" type="checkbox"/> | D10 |             | 73.62  | 1.57  | 2.48  | 0.63   |        |       |       |        |        |
| <input checked="" type="checkbox"/> | D11 |             |        |       |       |        |        |       |       |        |        |
| <input checked="" type="checkbox"/> | D12 |             |        |       |       |        |        |       |       |        |        |
| <input checked="" type="checkbox"/> | E1  | FCER1A 24   | 84.24  | 10.36 | 2.31  | 4.49   |        |       |       |        |        |
| <input checked="" type="checkbox"/> | E2  | FCER1A 24   | 84.34  | 10.81 | 2.23  | 4.85   |        |       |       |        |        |
| <input checked="" type="checkbox"/> | E3  | FCER1A 24   | 84.38  | 11.42 | 2.38  | 4.80   |        |       |       |        |        |
| <input checked="" type="checkbox"/> | E4  | FCER1A 26   | 84.58  | 9.13  | 2.30  | 3.97   |        |       |       |        |        |
| <input checked="" type="checkbox"/> | E5  | FCER1A 26   | 84.52  | 9.49  | 2.27  | 4.18   |        |       |       |        |        |
| <input checked="" type="checkbox"/> | E6  | FCER1A 26   | 84.51  | 9.50  | 2.34  | 4.07   |        |       |       |        |        |
| <input checked="" type="checkbox"/> | E7  |             | 79.17  | 1.27  | 2.07  | 0.61   |        |       |       |        |        |
| <input checked="" type="checkbox"/> | E8  |             | 78.58  | 0.29  | 4.58  | 0.06   |        |       |       |        |        |
| <input checked="" type="checkbox"/> | E9  |             | 80.70  | 6.54  | 2.32  | 2.81   |        |       |       |        |        |
| <input checked="" type="checkbox"/> | E10 |             | 66.66  | 0.16  | 2.55  | 0.06   |        |       |       |        |        |
| <input checked="" type="checkbox"/> | E11 |             | 65.41  | 0.94  | 7.70  | 0.12   |        |       |       |        |        |
| <input checked="" type="checkbox"/> | E12 |             | 79.25  | 8.86  | 1.85  | 4.80   |        |       |       |        |        |
| <input checked="" type="checkbox"/> | F1  | RGS1 24     |        |       |       |        |        |       |       |        |        |
| <input checked="" type="checkbox"/> | F2  | RGS1 24     | 86.72  | 6.97  | 2.29  | 3.04   |        |       |       |        |        |
| <input checked="" type="checkbox"/> | F3  | RGS1 24     | 86.68  | 10.04 | 2.38  | 4.22   |        |       |       |        |        |
| <input checked="" type="checkbox"/> | F4  | RGS1 26     | 86.73  | 6.82  | 2.31  | 2.95   |        |       |       |        |        |
| <input checked="" type="checkbox"/> | F5  | RGS1 26     |        |       |       |        |        |       |       |        |        |

## Results

| Inc                                 | Pos | Sample Name | Peak 1 |       |       |        | Peak 2 |      |       |        | Status |
|-------------------------------------|-----|-------------|--------|-------|-------|--------|--------|------|-------|--------|--------|
|                                     |     |             | Tm     | Area  | Width | Height | Tm     | Area | Width | Height |        |
| <input checked="" type="checkbox"/> | F6  | RGS1 26     |        |       |       |        |        |      |       |        |        |
| <input checked="" type="checkbox"/> | F7  |             | 75.65  | 5.45  | 2.79  | 1.95   |        |      |       |        |        |
| <input checked="" type="checkbox"/> | F8  |             |        |       |       |        |        |      |       |        |        |
| <input checked="" type="checkbox"/> | F9  |             | 77.03  | 9.22  | 2.88  | 3.20   |        |      |       |        |        |
| <input checked="" type="checkbox"/> | F10 |             | 72.79  | 2.22  | 2.36  | 0.94   | 78.43  | 8.06 | 2.37  | 3.40   |        |
| <input checked="" type="checkbox"/> | F11 |             | 73.11  | 9.20  | 2.93  | 3.14   |        |      |       |        |        |
| <input checked="" type="checkbox"/> | F12 |             | 76.41  | 10.38 | 2.99  | 3.47   |        |      |       |        |        |
| <input checked="" type="checkbox"/> | G1  |             | 79.00  | 5.28  | 2.46  | 2.15   |        |      |       |        |        |
| <input checked="" type="checkbox"/> | G2  |             | 75.11  | 3.70  | 2.55  | 1.45   | 79.40  | 2.47 | 2.37  | 1.04   |        |
| <input checked="" type="checkbox"/> | G3  |             | 74.18  | 0.97  | 1.85  | 0.53   | 78.76  | 5.74 | 2.40  | 2.40   |        |
| <input checked="" type="checkbox"/> | G4  |             | 79.10  | 6.84  | 2.61  | 2.62   |        |      |       |        |        |
| <input checked="" type="checkbox"/> | G5  |             | 74.11  | 0.57  | 1.52  | 0.37   | 79.03  | 7.33 | 2.58  | 2.84   |        |
| <input checked="" type="checkbox"/> | G6  |             | 78.97  | 7.44  | 2.61  | 2.85   |        |      |       |        |        |
| <input checked="" type="checkbox"/> | G7  |             | 78.92  | 7.09  | 2.56  | 2.77   |        |      |       |        |        |
| <input checked="" type="checkbox"/> | G8  |             | 79.05  | 7.46  | 2.60  | 2.87   |        |      |       |        |        |
| <input checked="" type="checkbox"/> | G9  |             | 79.16  | 7.94  | 2.61  | 3.04   |        |      |       |        |        |
| <input checked="" type="checkbox"/> | G10 |             | 74.35  | 0.87  | 1.78  | 0.49   | 79.15  | 7.17 | 2.58  | 2.78   |        |
| <input checked="" type="checkbox"/> | G11 |             | 74.36  | 0.63  | 1.72  | 0.37   | 79.30  | 8.10 | 2.60  | 3.11   |        |
| <input checked="" type="checkbox"/> | G12 |             | 74.56  | 0.86  | 1.75  | 0.49   | 79.34  | 6.65 | 2.60  | 2.56   |        |
| <input checked="" type="checkbox"/> | H1  |             | 84.19  | 9.14  | 2.40  | 3.80   |        |      |       |        |        |
| <input checked="" type="checkbox"/> | H2  |             | 84.27  | 9.58  | 2.41  | 3.97   |        |      |       |        |        |
| <input checked="" type="checkbox"/> | H3  |             | 84.29  | 9.07  | 2.37  | 3.82   |        |      |       |        |        |
| <input checked="" type="checkbox"/> | H4  |             | 84.30  | 9.17  | 2.41  | 3.80   |        |      |       |        |        |
| <input checked="" type="checkbox"/> | H5  |             | 84.24  | 10.41 | 2.45  | 4.25   |        |      |       |        |        |
| <input checked="" type="checkbox"/> | H6  |             | 84.23  | 10.09 | 2.42  | 4.16   |        |      |       |        |        |
| <input checked="" type="checkbox"/> | H7  |             | 84.21  | 10.26 | 2.35  | 4.36   |        |      |       |        |        |
| <input checked="" type="checkbox"/> | H8  |             | 84.38  | 9.24  | 2.32  | 3.98   |        |      |       |        |        |
| <input checked="" type="checkbox"/> | H9  |             | 84.54  | 9.98  | 2.30  | 4.33   |        |      |       |        |        |
| <input checked="" type="checkbox"/> | H10 |             | 84.39  | 10.65 | 2.35  | 4.54   |        |      |       |        |        |
| <input checked="" type="checkbox"/> | H11 |             | 84.36  | 11.25 | 2.32  | 4.85   |        |      |       |        |        |
| <input checked="" type="checkbox"/> | H12 |             | 84.57  | 10.13 | 2.28  | 4.44   |        |      |       |        |        |

### Melting Curves



### Melting Peaks

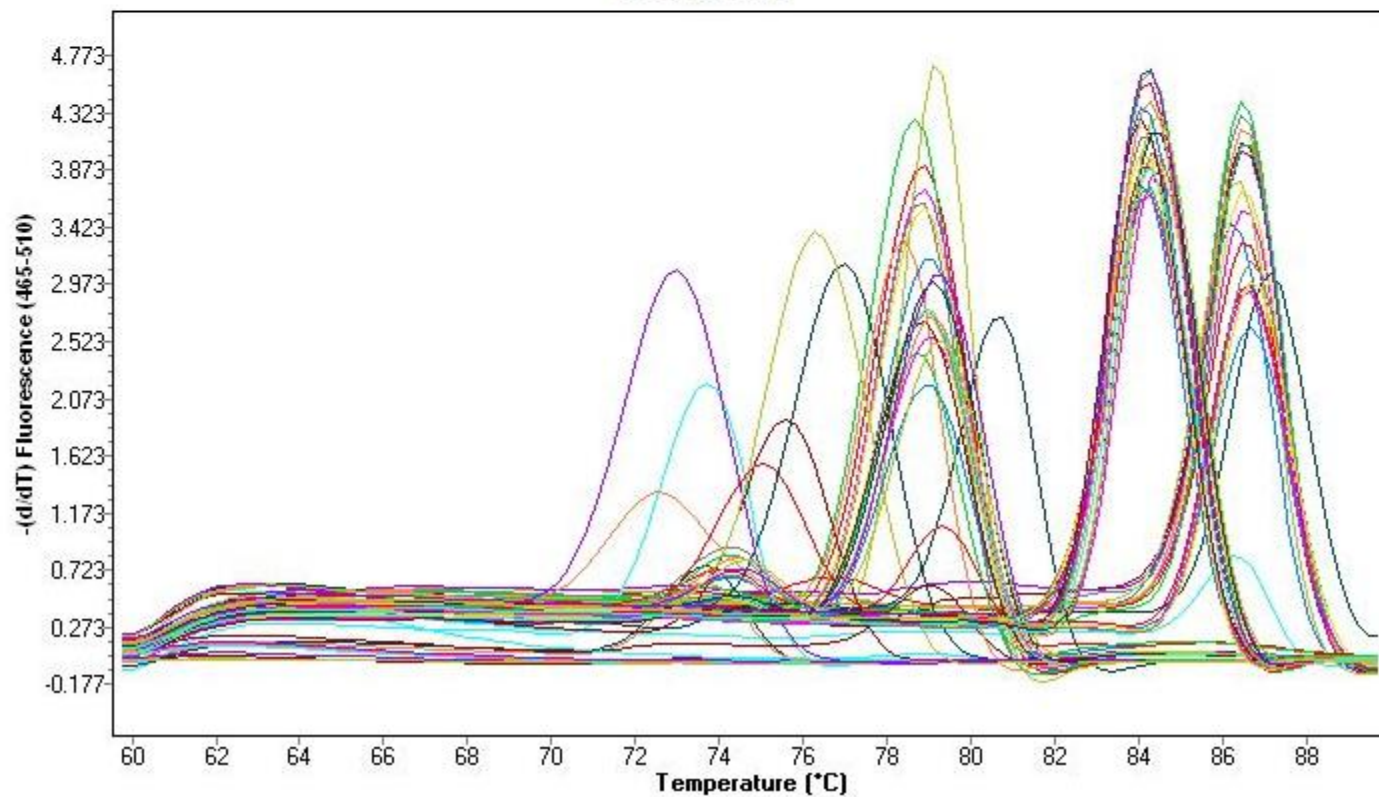

### Analysis Notes
