# Supplementary material for: Exploring differential gene expression and biomarker potential in systemic lupus erythematosus: a retrospective study
Source: PeerJ journal article supplement (doi:10.7717/peerj.19891), 2025-09-08
Supplement: qPCR_RAW_data.zip [file qPCR_RAW_data.zip]

# cobas® 4800 User Defined Workflow (UDF)

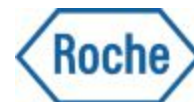

**xj20250528 HC1**

## Experiment

|               |                       |                    |                                    |
|---------------|-----------------------|--------------------|------------------------------------|
| Creation Date | 5/28/2025 11:55:14 AM | Last Modified Date | 6/2/2025 2:28:29 AM                |
| Operator      | System Admin          | Owner              | System Admin                       |
| Start Time    | 5/28/2025 11:56:28 AM | End Time           | 5/28/2025 12:56:05 PM              |
| Run State     | Completed             | Software Version   | LCS480 1.5.1.62 SP3 - UDF 2.1.0.26 |
| Macro         |                       | Macro Owner        |                                    |
| Macro Status  |                       |                    |                                    |
| Templates     | gongying              | Plate ID           |                                    |
| Test ID       |                       | Lot ID             |                                    |
| Color Comp ID |                       |                    |                                    |
| Run Notes     |                       |                    |                                    |

## Programs

|              |         |               |      |
|--------------|---------|---------------|------|
| Program Name | Program |               |      |
| Cycles       | 1       | Analysis Mode | None |

| Target (°C) | Acquisition Mode | Hold (hh:mm:ss) | Ramp Rate (°C/s) | Acquisitions (per °C) | Sec Target (°C) | Step size (°C) | Step Delay (cycles) |
|-------------|------------------|-----------------|------------------|-----------------------|-----------------|----------------|---------------------|
| 95          | None             | 00:00:30        | 4.40             |                       | 0               | 0              | 0                   |

|              |         |               |                |
|--------------|---------|---------------|----------------|
| Program Name | Program |               |                |
| Cycles       | 40      | Analysis Mode | Quantification |

| Target (°C) | Acquisition Mode | Hold (hh:mm:ss) | Ramp Rate (°C/s) | Acquisitions (per °C) | Sec Target (°C) | Step size (°C) | Step Delay (cycles) |
|-------------|------------------|-----------------|------------------|-----------------------|-----------------|----------------|---------------------|
| 95          | None             | 00:00:15        | 4.40             |                       | 0               | 0              | 0                   |
| 60          | Single           | 00:00:30        | 2.20             |                       | 0               | 0              | 0                   |

|              |         |               |                |
|--------------|---------|---------------|----------------|
| Program Name | Program |               |                |
| Cycles       | 1       | Analysis Mode | Melting Curves |

| Target (°C) | Acquisition Mode | Hold (hh:mm:ss) | Ramp Rate (°C/s) | Acquisitions (per °C) | Sec Target (°C) | Step size (°C) | Step Delay (cycles) |
|-------------|------------------|-----------------|------------------|-----------------------|-----------------|----------------|---------------------|
| 95          | None             | 00:01:00        | 4.40             |                       | 0               | 0              | 0                   |
| 60          | None             | 00:00:30        | 2.20             |                       | 0               | 0              | 0                   |
| 90          | Continuous       |                 | 0.11             | 5                     | 0               | 0              | 0                   |

|              |         |               |      |
|--------------|---------|---------------|------|
| Program Name | Program |               |      |
| Cycles       | 1       | Analysis Mode | None |

| Target (°C) | Acquisition Mode | Hold (hh:mm:ss) | Ramp Rate (°C/s) | Acquisitions (per °C) | Sec Target (°C) | Step size (°C) | Step Delay (cycles) |
|-------------|------------------|-----------------|------------------|-----------------------|-----------------|----------------|---------------------|
|-------------|------------------|-----------------|------------------|-----------------------|-----------------|----------------|---------------------|

| Target (°C) | Acquisition Mode | Hold (hh:mm:ss) | Ramp Rate (°C/s) | Acquisitions (per °C) | Sec Target (°C) | Step size (°C) | Step Delay (cycles) |
|-------------|------------------|-----------------|------------------|-----------------------|-----------------|----------------|---------------------|
| 40          | None             | 00:00:30        | 2.20             |                       | 0               | 0              | 0                   |

## Samples

| Sample Count |          | 96          |          |              |  |
|--------------|----------|-------------|----------|--------------|--|
| Subset       |          | All Samples |          |              |  |
| Pos          | Name     | ID          | Repl. Of | Sample Notes |  |
| A1           | GAPDH 1  |             |          |              |  |
| A2           | GAPDH 1  |             |          |              |  |
| A3           | GAPDH 1  |             |          |              |  |
| A4           | GAPDH 2  |             |          |              |  |
| A5           | GAPDH 2  |             |          |              |  |
| A6           | GAPDH 2  |             |          |              |  |
| A7           | GAPDH 3  |             |          |              |  |
| A8           | GAPDH 3  |             |          |              |  |
| A9           | GAPDH 3  |             |          |              |  |
| A10          | GAPDH 4  |             |          |              |  |
| A11          | GAPDH 4  |             |          |              |  |
| A12          | GAPDH 4  |             |          |              |  |
| B1           | FCER1A 1 |             |          |              |  |
| B2           | FCER1A 1 |             |          |              |  |
| B3           | FCER1A 1 |             |          |              |  |
| B4           | FCER1A 2 |             |          |              |  |
| B5           | FCER1A 2 |             |          |              |  |
| B6           | FCER1A 2 |             |          |              |  |
| B7           | FCER1A 3 |             |          |              |  |
| B8           | FCER1A 3 |             |          |              |  |
| B9           | FCER1A 3 |             |          |              |  |
| B10          | FCER1A 4 |             |          |              |  |
| B11          | FCER1A 4 |             |          |              |  |
| B12          | FCER1A 4 |             |          |              |  |
| C1           | RGS1 1   |             |          |              |  |
| C2           | RGS1 1   |             |          |              |  |
| C3           | RGS1 1   |             |          |              |  |
| C4           | RGS1 2   |             |          |              |  |
| C5           | RGS1 2   |             |          |              |  |
| C6           | RGS1 2   |             |          |              |  |
| C7           | RGS1 3   |             |          |              |  |
| C8           | RGS1 3   |             |          |              |  |
| C9           | RGS1 3   |             |          |              |  |
| C10          | RGS1 4   |             |          |              |  |
| C11          | RGS1 4   |             |          |              |  |
| C12          | RGS1 4   |             |          |              |  |

## Samples

| Sample Count |          | 96          |          |              |
|--------------|----------|-------------|----------|--------------|
| Subset       |          | All Samples |          |              |
| Pos          | Name     | ID          | Repl. Of | Sample Notes |
| D1           | GAPDH 4  |             |          |              |
| D2           | GAPDH 4  |             |          |              |
| D3           | GAPDH 4  |             |          |              |
| D4           | GAPDH 5  |             |          |              |
| D5           | GAPDH 5  |             |          |              |
| D6           | GAPDH 5  |             |          |              |
| D7           | GAPDH 6  |             |          |              |
| D8           | GAPDH 6  |             |          |              |
| D9           | GAPDH 6  |             |          |              |
| D10          | GAPDH 8  |             |          |              |
| D11          | GAPDH 8  |             |          |              |
| D12          | GAPDH 8  |             |          |              |
| E1           | FCER1A 5 |             |          |              |
| E2           | FCER1A 5 |             |          |              |
| E3           | FCER1A 5 |             |          |              |
| E4           | FCER1A 6 |             |          |              |
| E5           | FCER1A 6 |             |          |              |
| E6           | FCER1A 6 |             |          |              |
| E7           | FCER1A 7 |             |          |              |
| E8           | FCER1A 7 |             |          |              |
| E9           | FCER1A 7 |             |          |              |
| E10          | FCER1A 8 |             |          |              |
| E11          | FCER1A 8 |             |          |              |
| E12          | FCER1A 8 |             |          |              |
| F1           | RGS1 5   |             |          |              |
| F2           | RGS1 5   |             |          |              |
| F3           | RGS1 5   |             |          |              |
| F4           | RGS1 6   |             |          |              |
| F5           | RGS1 6   |             |          |              |
| F6           | RGS1 6   |             |          |              |
| F7           | RGS1 7   |             |          |              |
| F8           | RGS1 7   |             |          |              |
| F9           | RGS1 7   |             |          |              |
| F10          | RGS1 8   |             |          |              |
| F11          | RGS1 8   |             |          |              |
| F12          | RGS1 8   |             |          |              |
| G1           | blank    |             |          |              |
| G2           | blank    |             |          |              |
| G3           | blank    |             |          |              |

## Samples

| Sample Count | 96          |    |          |              |
|--------------|-------------|----|----------|--------------|
| Subset       | All Samples |    |          |              |
| Pos          | Name        | ID | Repl. Of | Sample Notes |
| G4           | blank       |    |          |              |
| G5           | blank       |    |          |              |
| G6           | blank       |    |          |              |
| G7           | blank       |    |          |              |
| G8           | blank       |    |          |              |
| G9           | blank       |    |          |              |
| G10          | blank       |    |          |              |
| G11          | blank       |    |          |              |
| G12          | blank       |    |          |              |
| H1           | blank       |    |          |              |
| H2           | blank       |    |          |              |
| H3           | blank       |    |          |              |
| H4           | blank       |    |          |              |
| H5           | blank       |    |          |              |
| H6           | blank       |    |          |              |
| H7           | blank       |    |          |              |
| H8           | blank       |    |          |              |
| H9           | blank       |    |          |              |
| H10          | blank       |    |          |              |
| H11          | blank       |    |          |              |
| H12          | blank       |    |          |              |

## Instrument

|      |      |               |       |
|------|------|---------------|-------|
| Name | Z480 | Serial Number | 56319 |
|------|------|---------------|-------|

## Revision History

| Revision | Date | User | Reason |
|----------|------|------|--------|
|          |      |      |        |

## Abs Quant/2nd Derivative Max for All Samples (Abs Quant/2nd Derivative Max)

### Settings

|                    |                 |       |  |
|--------------------|-----------------|-------|--|
| Channel            | 465-510         |       |  |
| Color Compensation | Off             |       |  |
| Program            | Program         | Units |  |
| Mode               | High Confidence |       |  |

|             |             |
|-------------|-------------|
| Subset Name | All Samples |
|-------------|-------------|

> - Late Cp call (last five cycles) has higher uncertainty

## Results

| Inc                                 | Pos | Name     | Type    | CP    | Concentration | Standard | Status |
|-------------------------------------|-----|----------|---------|-------|---------------|----------|--------|
| <input checked="" type="checkbox"/> | A1  | GAPDH 1  | Unknown | 29.00 |               |          |        |
| <input checked="" type="checkbox"/> | A2  | GAPDH 1  | Unknown | 32.60 |               |          |        |
| <input checked="" type="checkbox"/> | A3  | GAPDH 1  | Unknown | 31.98 |               |          |        |
| <input checked="" type="checkbox"/> | A4  | GAPDH 2  | Unknown | 28.33 |               |          |        |
| <input checked="" type="checkbox"/> | A5  | GAPDH 2  | Unknown | 22.67 |               |          |        |
| <input checked="" type="checkbox"/> | A6  | GAPDH 2  | Unknown | 31.98 |               |          |        |
| <input checked="" type="checkbox"/> | A7  | GAPDH 3  | Unknown | 29.70 |               |          |        |
| <input checked="" type="checkbox"/> | A8  | GAPDH 3  | Unknown | 33.53 |               |          |        |
| <input checked="" type="checkbox"/> | A9  | GAPDH 3  | Unknown | 29.47 |               |          |        |
| <input checked="" type="checkbox"/> | A10 | GAPDH 4  | Unknown | 31.81 |               |          |        |
| <input checked="" type="checkbox"/> | A11 | GAPDH 4  | Unknown | 31.68 |               |          |        |
| <input checked="" type="checkbox"/> | A12 | GAPDH 4  | Unknown | 30.11 |               |          |        |
| <input checked="" type="checkbox"/> | B1  | FCER1A 1 | Unknown | 29.70 |               |          |        |
| <input checked="" type="checkbox"/> | B2  | FCER1A 1 | Unknown | 31.65 |               |          |        |
| <input checked="" type="checkbox"/> | B3  | FCER1A 1 | Unknown | 29.72 |               |          |        |
| <input checked="" type="checkbox"/> | B4  | FCER1A 2 | Unknown | 26.96 |               |          |        |
| <input checked="" type="checkbox"/> | B5  | FCER1A 2 | Unknown | 28.05 |               |          |        |
| <input checked="" type="checkbox"/> | B6  | FCER1A 2 | Unknown | 28.47 |               |          |        |
| <input checked="" type="checkbox"/> | B7  | FCER1A 3 | Unknown | 29.94 |               |          |        |
| <input checked="" type="checkbox"/> | B8  | FCER1A 3 | Unknown | 29.19 |               |          |        |
| <input checked="" type="checkbox"/> | B9  | FCER1A 3 | Unknown | 29.44 |               |          |        |
| <input checked="" type="checkbox"/> | B10 | FCER1A 4 | Unknown | 29.82 |               |          |        |
| <input checked="" type="checkbox"/> | B11 | FCER1A 4 | Unknown | 29.78 |               |          |        |
| <input checked="" type="checkbox"/> | B12 | FCER1A 4 | Unknown | 28.59 |               |          |        |
| <input checked="" type="checkbox"/> | C1  | RGS1 1   | Unknown | 34.30 |               |          |        |
| <input checked="" type="checkbox"/> | C2  | RGS1 1   | Unknown | 35.00 |               |          | >      |
| <input checked="" type="checkbox"/> | C3  | RGS1 1   | Unknown | 33.15 |               |          |        |
| <input checked="" type="checkbox"/> | C4  | RGS1 2   | Unknown | 32.22 |               |          |        |
| <input checked="" type="checkbox"/> | C5  | RGS1 2   | Unknown | 31.22 |               |          |        |
| <input checked="" type="checkbox"/> | C6  | RGS1 2   | Unknown | 31.82 |               |          |        |
| <input checked="" type="checkbox"/> | C7  | RGS1 3   | Unknown | 34.04 |               |          |        |
| <input checked="" type="checkbox"/> | C8  | RGS1 3   | Unknown | 32.78 |               |          |        |
| <input checked="" type="checkbox"/> | C9  | RGS1 3   | Unknown | 31.24 |               |          |        |
| <input checked="" type="checkbox"/> | C10 | RGS1 4   | Unknown | 35.00 |               |          | >      |
| <input checked="" type="checkbox"/> | C11 | RGS1 4   | Unknown | 35.00 |               |          | >      |
| <input checked="" type="checkbox"/> | C12 | RGS1 4   | Unknown | 35.00 |               |          | >      |
| <input checked="" type="checkbox"/> | D1  | GAPDH 4  | Unknown | 30.94 |               |          |        |

> - Late Cp call (last five cycles) has higher uncertainty

## Results

| Inc                                 | Pos | Name     | Type    | CP    | Concentration | Standard | Status |
|-------------------------------------|-----|----------|---------|-------|---------------|----------|--------|
| <input checked="" type="checkbox"/> | D2  | GAPDH 4  | Unknown | 27.83 |               |          |        |
| <input checked="" type="checkbox"/> | D3  | GAPDH 4  | Unknown | 31.28 |               |          |        |
| <input checked="" type="checkbox"/> | D4  | GAPDH 5  | Unknown | 29.66 |               |          |        |
| <input checked="" type="checkbox"/> | D5  | GAPDH 5  | Unknown | 31.45 |               |          |        |
| <input checked="" type="checkbox"/> | D6  | GAPDH 5  | Unknown | 33.32 |               |          |        |
| <input checked="" type="checkbox"/> | D7  | GAPDH 6  | Unknown | 32.09 |               |          |        |
| <input checked="" type="checkbox"/> | D8  | GAPDH 6  | Unknown | 31.18 |               |          |        |
| <input checked="" type="checkbox"/> | D9  | GAPDH 6  | Unknown | 31.62 |               |          |        |
| <input checked="" type="checkbox"/> | D10 | GAPDH 8  | Unknown | 31.21 |               |          |        |
| <input checked="" type="checkbox"/> | D11 | GAPDH 8  | Unknown | 32.42 |               |          |        |
| <input checked="" type="checkbox"/> | D12 | GAPDH 8  | Unknown | 29.89 |               |          |        |
| <input checked="" type="checkbox"/> | E1  | FCER1A 5 | Unknown | 31.07 |               |          |        |
| <input checked="" type="checkbox"/> | E2  | FCER1A 5 | Unknown | 28.89 |               |          |        |
| <input checked="" type="checkbox"/> | E3  | FCER1A 5 | Unknown | 29.85 |               |          |        |
| <input checked="" type="checkbox"/> | E4  | FCER1A 6 | Unknown | 28.83 |               |          |        |
| <input checked="" type="checkbox"/> | E5  | FCER1A 6 | Unknown | 25.93 |               |          |        |
| <input checked="" type="checkbox"/> | E6  | FCER1A 6 | Unknown | 29.63 |               |          |        |
| <input checked="" type="checkbox"/> | E7  | FCER1A 7 | Unknown | 29.62 |               |          |        |
| <input checked="" type="checkbox"/> | E8  | FCER1A 7 | Unknown | 29.69 |               |          |        |
| <input checked="" type="checkbox"/> | E9  | FCER1A 7 | Unknown | 28.91 |               |          |        |
| <input checked="" type="checkbox"/> | E10 | FCER1A 8 | Unknown | 29.31 |               |          |        |
| <input checked="" type="checkbox"/> | E11 | FCER1A 8 | Unknown | 28.79 |               |          |        |
| <input checked="" type="checkbox"/> | E12 | FCER1A 8 | Unknown | 29.56 |               |          |        |
| <input checked="" type="checkbox"/> | F1  | RGS1 5   | Unknown | 33.32 |               |          |        |
| <input checked="" type="checkbox"/> | F2  | RGS1 5   | Unknown | 33.86 |               |          |        |
| <input checked="" type="checkbox"/> | F3  | RGS1 5   | Unknown | 35.00 |               |          | >      |
| <input checked="" type="checkbox"/> | F4  | RGS1 6   | Unknown | 32.99 |               |          |        |
| <input checked="" type="checkbox"/> | F5  | RGS1 6   | Unknown | 33.67 |               |          |        |
| <input checked="" type="checkbox"/> | F6  | RGS1 6   | Unknown | 33.88 |               |          |        |
| <input checked="" type="checkbox"/> | F7  | RGS1 7   | Unknown | 32.47 |               |          |        |
| <input checked="" type="checkbox"/> | F8  | RGS1 7   | Unknown | 32.62 |               |          |        |
| <input checked="" type="checkbox"/> | F9  | RGS1 7   | Unknown | 31.90 |               |          |        |
| <input checked="" type="checkbox"/> | F10 | RGS1 8   | Unknown | 31.77 |               |          |        |
| <input checked="" type="checkbox"/> | F11 | RGS1 8   | Unknown | 32.39 |               |          |        |
| <input checked="" type="checkbox"/> | F12 | RGS1 8   | Unknown | 31.83 |               |          |        |
| <input checked="" type="checkbox"/> | G1  | blank    | Unknown |       |               |          |        |
| <input checked="" type="checkbox"/> | G2  | blank    | Unknown |       |               |          |        |

> - Late Cp call (last five cycles) has higher uncertainty

---

**Results**

| Inc                                 | Pos | Name  | Type    | CP | Concentration | Standard | Status |
|-------------------------------------|-----|-------|---------|----|---------------|----------|--------|
| <input checked="" type="checkbox"/> | G3  | blank | Unknown |    |               |          |        |
| <input checked="" type="checkbox"/> | G4  | blank | Unknown |    |               |          |        |
| <input checked="" type="checkbox"/> | G5  | blank | Unknown |    |               |          |        |
| <input checked="" type="checkbox"/> | G6  | blank | Unknown |    |               |          |        |
| <input checked="" type="checkbox"/> | G7  | blank | Unknown |    |               |          |        |
| <input checked="" type="checkbox"/> | G8  | blank | Unknown |    |               |          |        |
| <input checked="" type="checkbox"/> | G9  | blank | Unknown |    |               |          |        |
| <input checked="" type="checkbox"/> | G10 | blank | Unknown |    |               |          |        |
| <input checked="" type="checkbox"/> | G11 | blank | Unknown |    |               |          |        |
| <input checked="" type="checkbox"/> | G12 | blank | Unknown |    |               |          |        |
| <input checked="" type="checkbox"/> | H1  | blank | Unknown |    |               |          |        |
| <input checked="" type="checkbox"/> | H2  | blank | Unknown |    |               |          |        |
| <input checked="" type="checkbox"/> | H3  | blank | Unknown |    |               |          |        |
| <input checked="" type="checkbox"/> | H4  | blank | Unknown |    |               |          |        |
| <input checked="" type="checkbox"/> | H5  | blank | Unknown |    |               |          |        |
| <input checked="" type="checkbox"/> | H6  | blank | Unknown |    |               |          |        |
| <input checked="" type="checkbox"/> | H7  | blank | Unknown |    |               |          |        |
| <input checked="" type="checkbox"/> | H8  | blank | Unknown |    |               |          |        |
| <input checked="" type="checkbox"/> | H9  | blank | Unknown |    |               |          |        |
| <input checked="" type="checkbox"/> | H10 | blank | Unknown |    |               |          |        |
| <input checked="" type="checkbox"/> | H11 | blank | Unknown |    |               |          |        |
| <input checked="" type="checkbox"/> | H12 | blank | Unknown |    |               |          |        |

> - Late Cp call (last five cycles) has higher uncertainty

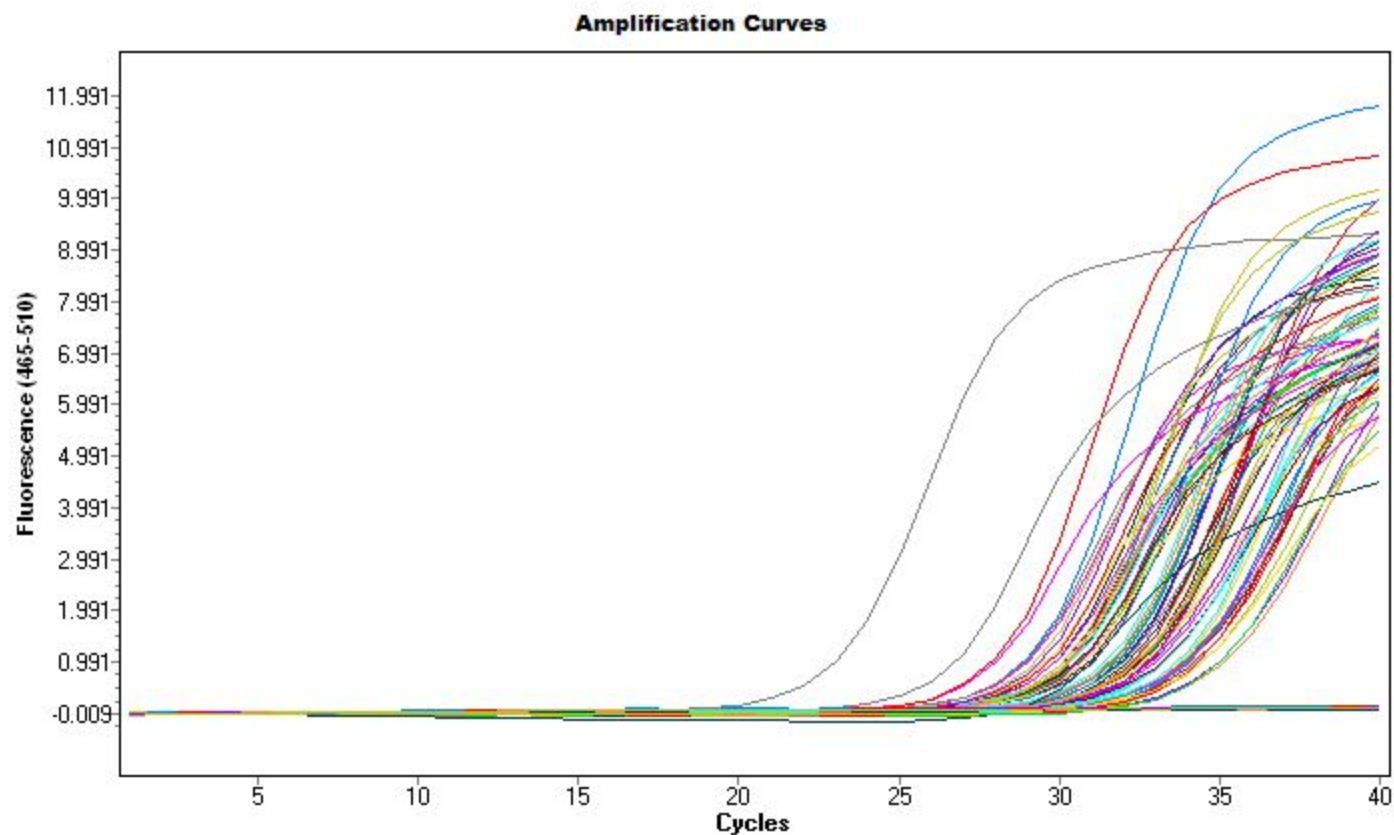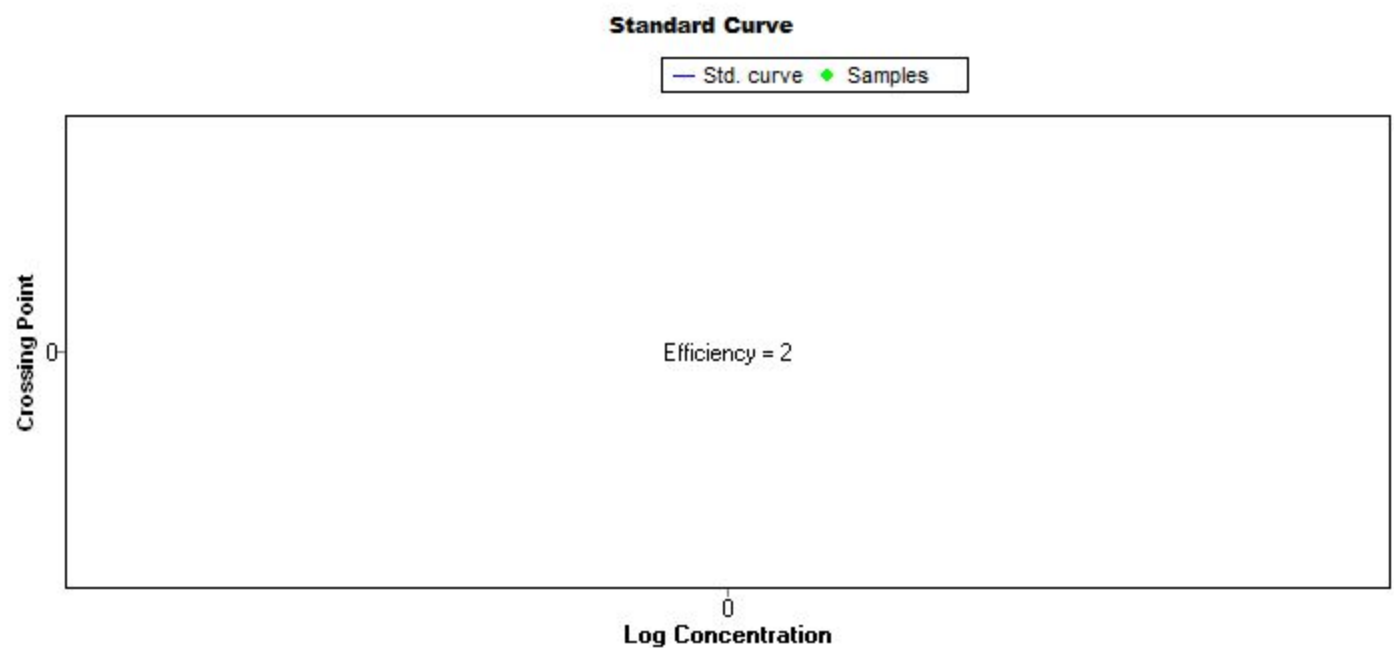

**Analysis Notes**

**Abs Quant/2nd Derivative Max for All Samples (1) (Abs Quant/2nd Derivative Max)**



## Settings

|                    |                 |       |  |
|--------------------|-----------------|-------|--|
| Channel            | 465-510         |       |  |
| Color Compensation | Off             |       |  |
| Program            | Program         | Units |  |
| Mode               | High Confidence |       |  |

|             |             |
|-------------|-------------|
| Subset Name | All Samples |
|-------------|-------------|

## Results

| Inc                                 | Pos | Name     | Type    | CP    | Concentration | Standard | Status |
|-------------------------------------|-----|----------|---------|-------|---------------|----------|--------|
| <input checked="" type="checkbox"/> | A1  | GAPDH 1  | Unknown | 29.00 |               |          |        |
| <input checked="" type="checkbox"/> | A2  | GAPDH 1  | Unknown | 32.60 |               |          |        |
| <input checked="" type="checkbox"/> | A3  | GAPDH 1  | Unknown | 31.98 |               |          |        |
| <input checked="" type="checkbox"/> | A4  | GAPDH 2  | Unknown | 28.33 |               |          |        |
| <input checked="" type="checkbox"/> | A5  | GAPDH 2  | Unknown | 22.67 |               |          |        |
| <input checked="" type="checkbox"/> | A6  | GAPDH 2  | Unknown | 31.98 |               |          |        |
| <input checked="" type="checkbox"/> | A7  | GAPDH 3  | Unknown | 29.70 |               |          |        |
| <input checked="" type="checkbox"/> | A8  | GAPDH 3  | Unknown | 33.53 |               |          |        |
| <input checked="" type="checkbox"/> | A9  | GAPDH 3  | Unknown | 29.47 |               |          |        |
| <input checked="" type="checkbox"/> | A10 | GAPDH 4  | Unknown | 31.81 |               |          |        |
| <input checked="" type="checkbox"/> | A11 | GAPDH 4  | Unknown | 31.68 |               |          |        |
| <input checked="" type="checkbox"/> | A12 | GAPDH 4  | Unknown | 30.11 |               |          |        |
| <input checked="" type="checkbox"/> | B1  | FCER1A 1 | Unknown | 29.70 |               |          |        |
| <input checked="" type="checkbox"/> | B2  | FCER1A 1 | Unknown | 31.65 |               |          |        |
| <input checked="" type="checkbox"/> | B3  | FCER1A 1 | Unknown | 29.72 |               |          |        |
| <input checked="" type="checkbox"/> | B4  | FCER1A 2 | Unknown | 26.96 |               |          |        |
| <input checked="" type="checkbox"/> | B5  | FCER1A 2 | Unknown | 28.05 |               |          |        |
| <input checked="" type="checkbox"/> | B6  | FCER1A 2 | Unknown | 28.47 |               |          |        |
| <input checked="" type="checkbox"/> | B7  | FCER1A 3 | Unknown | 29.94 |               |          |        |
| <input checked="" type="checkbox"/> | B8  | FCER1A 3 | Unknown | 29.19 |               |          |        |
| <input checked="" type="checkbox"/> | B9  | FCER1A 3 | Unknown | 29.44 |               |          |        |
| <input checked="" type="checkbox"/> | B10 | FCER1A 4 | Unknown | 29.82 |               |          |        |
| <input checked="" type="checkbox"/> | B11 | FCER1A 4 | Unknown | 29.78 |               |          |        |
| <input checked="" type="checkbox"/> | B12 | FCER1A 4 | Unknown | 28.59 |               |          |        |
| <input checked="" type="checkbox"/> | C1  | RGS1 1   | Unknown | 34.30 |               |          |        |
| <input checked="" type="checkbox"/> | C2  | RGS1 1   | Unknown | 35.00 |               |          | >      |
| <input checked="" type="checkbox"/> | C3  | RGS1 1   | Unknown | 33.15 |               |          |        |
| <input checked="" type="checkbox"/> | C4  | RGS1 2   | Unknown | 32.22 |               |          |        |
| <input checked="" type="checkbox"/> | C5  | RGS1 2   | Unknown | 31.22 |               |          |        |
| <input checked="" type="checkbox"/> | C6  | RGS1 2   | Unknown | 31.82 |               |          |        |

> - Late Cp call (last five cycles) has higher uncertainty

## Results

| Inc                                 | Pos | Name     | Type    | CP    | Concentration | Standard | Status |
|-------------------------------------|-----|----------|---------|-------|---------------|----------|--------|
| <input checked="" type="checkbox"/> | C7  | RGS1 3   | Unknown | 34.04 |               |          |        |
| <input checked="" type="checkbox"/> | C8  | RGS1 3   | Unknown | 32.78 |               |          |        |
| <input checked="" type="checkbox"/> | C9  | RGS1 3   | Unknown | 31.24 |               |          |        |
| <input checked="" type="checkbox"/> | C10 | RGS1 4   | Unknown | 35.00 |               |          | >      |
| <input checked="" type="checkbox"/> | C11 | RGS1 4   | Unknown | 35.00 |               |          | >      |
| <input checked="" type="checkbox"/> | C12 | RGS1 4   | Unknown | 35.00 |               |          | >      |
| <input checked="" type="checkbox"/> | D1  | GAPDH 4  | Unknown | 30.94 |               |          |        |
| <input checked="" type="checkbox"/> | D2  | GAPDH 4  | Unknown | 27.83 |               |          |        |
| <input checked="" type="checkbox"/> | D3  | GAPDH 4  | Unknown | 31.28 |               |          |        |
| <input checked="" type="checkbox"/> | D4  | GAPDH 5  | Unknown | 29.66 |               |          |        |
| <input checked="" type="checkbox"/> | D5  | GAPDH 5  | Unknown | 31.45 |               |          |        |
| <input checked="" type="checkbox"/> | D6  | GAPDH 5  | Unknown | 33.32 |               |          |        |
| <input checked="" type="checkbox"/> | D7  | GAPDH 6  | Unknown | 32.09 |               |          |        |
| <input checked="" type="checkbox"/> | D8  | GAPDH 6  | Unknown | 31.18 |               |          |        |
| <input checked="" type="checkbox"/> | D9  | GAPDH 6  | Unknown | 31.62 |               |          |        |
| <input checked="" type="checkbox"/> | D10 | GAPDH 8  | Unknown | 31.21 |               |          |        |
| <input checked="" type="checkbox"/> | D11 | GAPDH 8  | Unknown | 32.42 |               |          |        |
| <input checked="" type="checkbox"/> | D12 | GAPDH 8  | Unknown | 29.89 |               |          |        |
| <input checked="" type="checkbox"/> | E1  | FCER1A 5 | Unknown | 31.07 |               |          |        |
| <input checked="" type="checkbox"/> | E2  | FCER1A 5 | Unknown | 28.89 |               |          |        |
| <input checked="" type="checkbox"/> | E3  | FCER1A 5 | Unknown | 29.85 |               |          |        |
| <input checked="" type="checkbox"/> | E4  | FCER1A 6 | Unknown | 28.83 |               |          |        |
| <input checked="" type="checkbox"/> | E5  | FCER1A 6 | Unknown | 25.93 |               |          |        |
| <input checked="" type="checkbox"/> | E6  | FCER1A 6 | Unknown | 29.63 |               |          |        |
| <input checked="" type="checkbox"/> | E7  | FCER1A 7 | Unknown | 29.62 |               |          |        |
| <input checked="" type="checkbox"/> | E8  | FCER1A 7 | Unknown | 29.69 |               |          |        |
| <input checked="" type="checkbox"/> | E9  | FCER1A 7 | Unknown | 28.91 |               |          |        |
| <input checked="" type="checkbox"/> | E10 | FCER1A 8 | Unknown | 29.31 |               |          |        |
| <input checked="" type="checkbox"/> | E11 | FCER1A 8 | Unknown | 28.79 |               |          |        |
| <input checked="" type="checkbox"/> | E12 | FCER1A 8 | Unknown | 29.56 |               |          |        |
| <input checked="" type="checkbox"/> | F1  | RGS1 5   | Unknown | 33.32 |               |          |        |
| <input checked="" type="checkbox"/> | F2  | RGS1 5   | Unknown | 33.86 |               |          |        |
| <input checked="" type="checkbox"/> | F3  | RGS1 5   | Unknown | 35.00 |               |          | >      |
| <input checked="" type="checkbox"/> | F4  | RGS1 6   | Unknown | 32.99 |               |          |        |
| <input checked="" type="checkbox"/> | F5  | RGS1 6   | Unknown | 33.67 |               |          |        |
| <input checked="" type="checkbox"/> | F6  | RGS1 6   | Unknown | 33.88 |               |          |        |
| <input checked="" type="checkbox"/> | F7  | RGS1 7   | Unknown | 32.47 |               |          |        |

> - Late Cp call (last five cycles) has higher uncertainty

## Results

| Inc                                 | Pos | Name   | Type    | CP    | Concentration | Standard | Status |
|-------------------------------------|-----|--------|---------|-------|---------------|----------|--------|
| <input checked="" type="checkbox"/> | F8  | RGS1 7 | Unknown | 32.62 |               |          |        |
| <input checked="" type="checkbox"/> | F9  | RGS1 7 | Unknown | 31.90 |               |          |        |
| <input checked="" type="checkbox"/> | F10 | RGS1 8 | Unknown | 31.77 |               |          |        |
| <input checked="" type="checkbox"/> | F11 | RGS1 8 | Unknown | 32.39 |               |          |        |
| <input checked="" type="checkbox"/> | F12 | RGS1 8 | Unknown | 31.83 |               |          |        |
| <input checked="" type="checkbox"/> | G1  | blank  | Unknown |       |               |          |        |
| <input checked="" type="checkbox"/> | G2  | blank  | Unknown |       |               |          |        |
| <input checked="" type="checkbox"/> | G3  | blank  | Unknown |       |               |          |        |
| <input checked="" type="checkbox"/> | G4  | blank  | Unknown |       |               |          |        |
| <input checked="" type="checkbox"/> | G5  | blank  | Unknown |       |               |          |        |
| <input checked="" type="checkbox"/> | G6  | blank  | Unknown |       |               |          |        |
| <input checked="" type="checkbox"/> | G7  | blank  | Unknown |       |               |          |        |
| <input checked="" type="checkbox"/> | G8  | blank  | Unknown |       |               |          |        |
| <input checked="" type="checkbox"/> | G9  | blank  | Unknown |       |               |          |        |
| <input checked="" type="checkbox"/> | G10 | blank  | Unknown |       |               |          |        |
| <input checked="" type="checkbox"/> | G11 | blank  | Unknown |       |               |          |        |
| <input checked="" type="checkbox"/> | G12 | blank  | Unknown |       |               |          |        |
| <input checked="" type="checkbox"/> | H1  | blank  | Unknown |       |               |          |        |
| <input checked="" type="checkbox"/> | H2  | blank  | Unknown |       |               |          |        |
| <input checked="" type="checkbox"/> | H3  | blank  | Unknown |       |               |          |        |
| <input checked="" type="checkbox"/> | H4  | blank  | Unknown |       |               |          |        |
| <input checked="" type="checkbox"/> | H5  | blank  | Unknown |       |               |          |        |
| <input checked="" type="checkbox"/> | H6  | blank  | Unknown |       |               |          |        |
| <input checked="" type="checkbox"/> | H7  | blank  | Unknown |       |               |          |        |
| <input checked="" type="checkbox"/> | H8  | blank  | Unknown |       |               |          |        |
| <input checked="" type="checkbox"/> | H9  | blank  | Unknown |       |               |          |        |
| <input checked="" type="checkbox"/> | H10 | blank  | Unknown |       |               |          |        |
| <input checked="" type="checkbox"/> | H11 | blank  | Unknown |       |               |          |        |
| <input checked="" type="checkbox"/> | H12 | blank  | Unknown |       |               |          |        |

> - Late Cp call (last five cycles) has higher uncertainty

### Amplification Curves

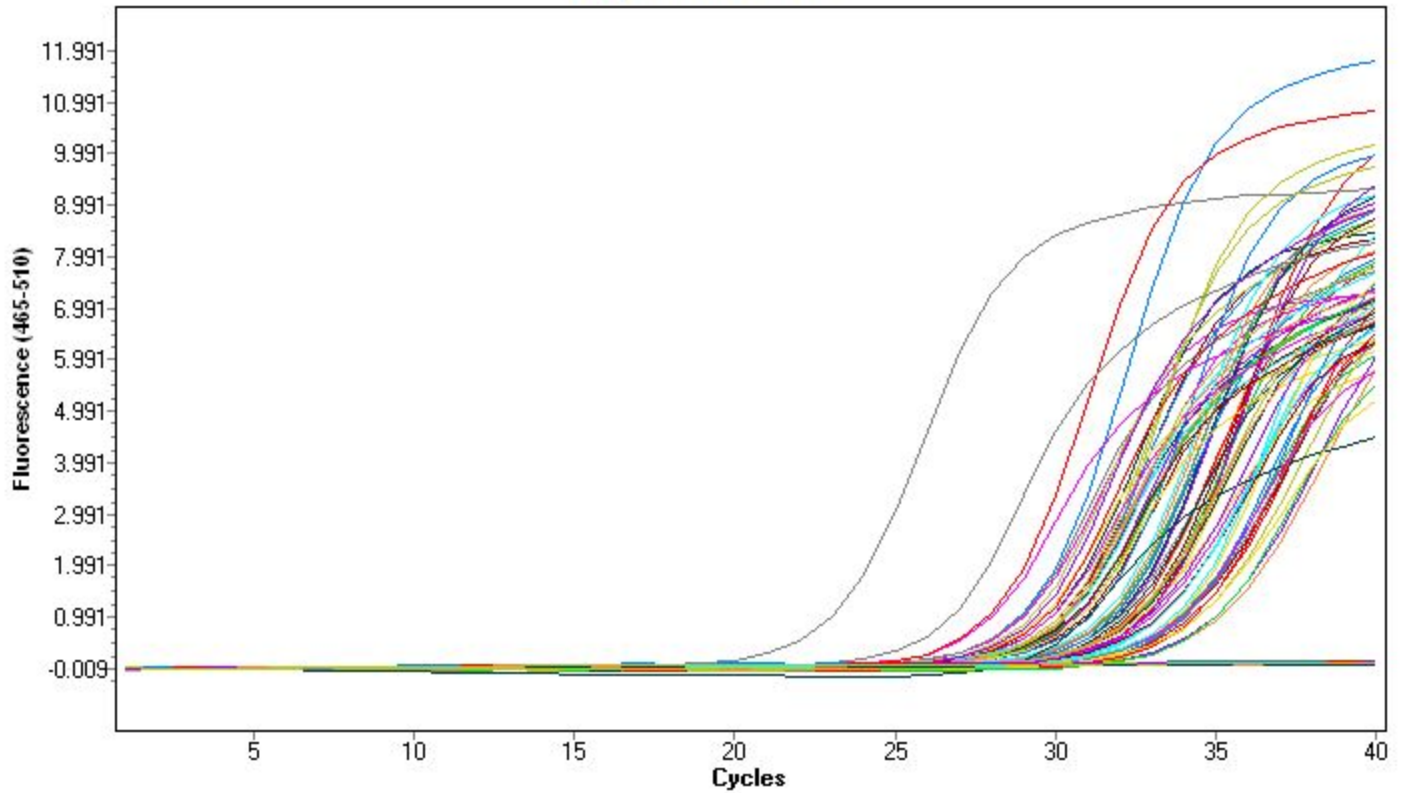

### Standard Curve

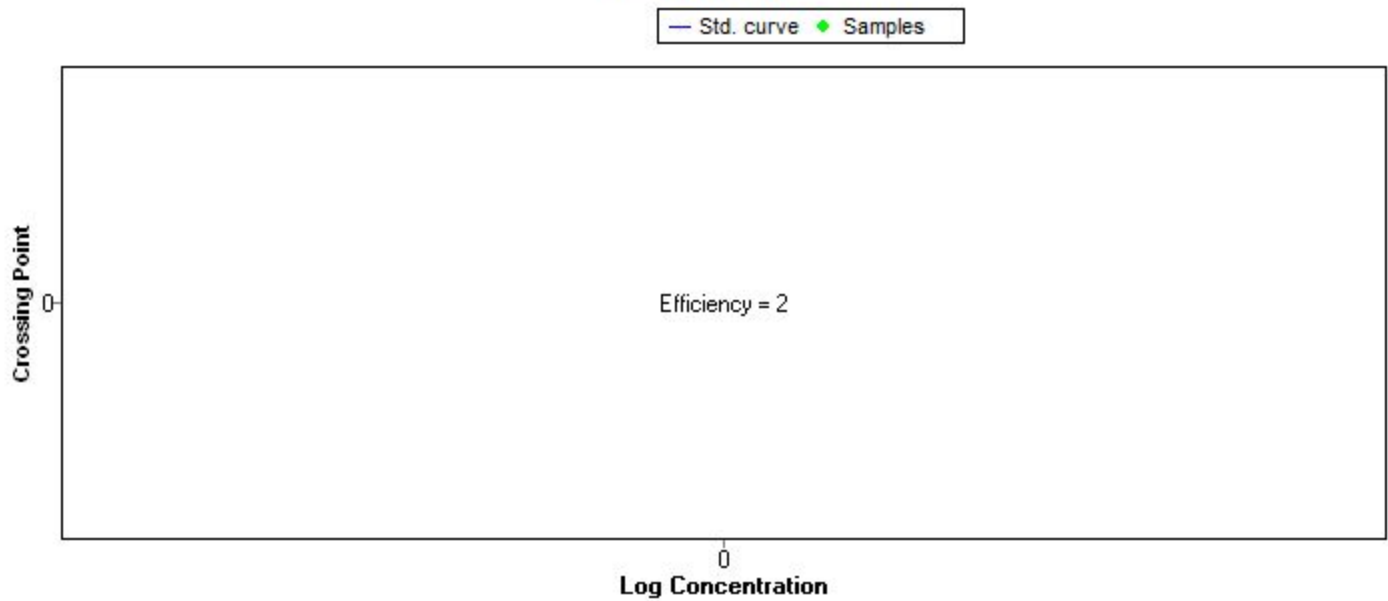

### Analysis Notes

Abs Quant/Fit Points for All Samples (Abs Quant/Fit Points)

## Settings

|                    |                       |                  |        |                    |         |  |
|--------------------|-----------------------|------------------|--------|--------------------|---------|--|
| Channel            | 465-510               |                  |        |                    |         |  |
| Color Compensation | Off                   |                  |        |                    |         |  |
| Standard Curve     | Set Efficiency (2.00) |                  |        |                    |         |  |
| Program            | Program               |                  |        |                    | Units   |  |
| First Cycle        | 1                     | Last Cycle       | 40     | Background         | 2-6     |  |
| Noiseband Method   | Auto                  | Noiseband        | 0.3649 | STD Dev Multiplier | 12.0000 |  |
| # of Fit Points    | 2                     | Threshold Method | Auto   | Threshold          | 0.3649  |  |

|             |             |
|-------------|-------------|
| Subset Name | All Samples |
|-------------|-------------|

## Results

| Inc                                 | Pos | Name     | Type    | CP    | Concentration | Standard | Status |
|-------------------------------------|-----|----------|---------|-------|---------------|----------|--------|
| <input checked="" type="checkbox"/> | A1  | GAPDH 1  | Unknown | 24.67 |               |          |        |
| <input checked="" type="checkbox"/> | A2  | GAPDH 1  | Unknown | 28.88 |               |          |        |
| <input checked="" type="checkbox"/> | A3  | GAPDH 1  | Unknown | 28.56 |               |          |        |
| <input checked="" type="checkbox"/> | A4  | GAPDH 2  | Unknown | 25.47 |               |          |        |
| <input checked="" type="checkbox"/> | A5  | GAPDH 2  | Unknown | 19.45 |               |          |        |
| <input checked="" type="checkbox"/> | A6  | GAPDH 2  | Unknown | 28.88 |               |          |        |
| <input checked="" type="checkbox"/> | A7  | GAPDH 3  | Unknown | 26.41 |               |          |        |
| <input checked="" type="checkbox"/> | A8  | GAPDH 3  | Unknown | 29.60 |               |          |        |
| <input checked="" type="checkbox"/> | A9  | GAPDH 3  | Unknown | 26.45 |               |          |        |
| <input checked="" type="checkbox"/> | A10 | GAPDH 4  | Unknown | 28.65 |               |          |        |
| <input checked="" type="checkbox"/> | A11 | GAPDH 4  | Unknown | 27.95 |               |          |        |
| <input checked="" type="checkbox"/> | A12 | GAPDH 4  | Unknown | 26.70 |               |          |        |
| <input checked="" type="checkbox"/> | B1  | FCER1A 1 | Unknown | 26.66 |               |          |        |
| <input checked="" type="checkbox"/> | B2  | FCER1A 1 | Unknown | 28.52 |               |          |        |
| <input checked="" type="checkbox"/> | B3  | FCER1A 1 | Unknown | 26.75 |               |          |        |
| <input checked="" type="checkbox"/> | B4  | FCER1A 2 | Unknown | 24.46 |               |          |        |
| <input checked="" type="checkbox"/> | B5  | FCER1A 2 | Unknown | 24.97 |               |          |        |
| <input checked="" type="checkbox"/> | B6  | FCER1A 2 | Unknown | 25.80 |               |          |        |
| <input checked="" type="checkbox"/> | B7  | FCER1A 3 | Unknown | 26.90 |               |          |        |
| <input checked="" type="checkbox"/> | B8  | FCER1A 3 | Unknown | 26.79 |               |          |        |
| <input checked="" type="checkbox"/> | B9  | FCER1A 3 | Unknown | 26.99 |               |          |        |
| <input checked="" type="checkbox"/> | B10 | FCER1A 4 | Unknown | 27.33 |               |          |        |
| <input checked="" type="checkbox"/> | B11 | FCER1A 4 | Unknown | 26.98 |               |          |        |
| <input checked="" type="checkbox"/> | B12 | FCER1A 4 | Unknown | 25.66 |               |          |        |
| <input checked="" type="checkbox"/> | C1  | RGS1 1   | Unknown | 30.33 |               |          |        |
| <input checked="" type="checkbox"/> | C2  | RGS1 1   | Unknown | 30.54 |               |          |        |
| <input checked="" type="checkbox"/> | C3  | RGS1 1   | Unknown | 29.76 |               |          |        |

## Results

| Inc                                 | Pos | Name     | Type    | CP    | Concentration | Standard | Status |
|-------------------------------------|-----|----------|---------|-------|---------------|----------|--------|
| <input checked="" type="checkbox"/> | C4  | RGS1 2   | Unknown | 28.99 |               |          |        |
| <input checked="" type="checkbox"/> | C5  | RGS1 2   | Unknown | 28.84 |               |          |        |
| <input checked="" type="checkbox"/> | C6  | RGS1 2   | Unknown | 28.67 |               |          |        |
| <input checked="" type="checkbox"/> | C7  | RGS1 3   | Unknown | 29.80 |               |          |        |
| <input checked="" type="checkbox"/> | C8  | RGS1 3   | Unknown | 29.67 |               |          |        |
| <input checked="" type="checkbox"/> | C9  | RGS1 3   | Unknown | 28.95 |               |          |        |
| <input checked="" type="checkbox"/> | C10 | RGS1 4   | Unknown | 31.55 |               |          |        |
| <input checked="" type="checkbox"/> | C11 | RGS1 4   | Unknown | 31.67 |               |          |        |
| <input checked="" type="checkbox"/> | C12 | RGS1 4   | Unknown | 31.38 |               |          |        |
| <input checked="" type="checkbox"/> | D1  | GAPDH 4  | Unknown | 26.52 |               |          |        |
| <input checked="" type="checkbox"/> | D2  | GAPDH 4  | Unknown | 24.43 |               |          |        |
| <input checked="" type="checkbox"/> | D3  | GAPDH 4  | Unknown | 27.83 |               |          |        |
| <input checked="" type="checkbox"/> | D4  | GAPDH 5  | Unknown | 26.58 |               |          |        |
| <input checked="" type="checkbox"/> | D5  | GAPDH 5  | Unknown | 27.78 |               |          |        |
| <input checked="" type="checkbox"/> | D6  | GAPDH 5  | Unknown | 30.44 |               |          |        |
| <input checked="" type="checkbox"/> | D7  | GAPDH 6  | Unknown | 28.47 |               |          |        |
| <input checked="" type="checkbox"/> | D8  | GAPDH 6  | Unknown | 27.58 |               |          |        |
| <input checked="" type="checkbox"/> | D9  | GAPDH 6  | Unknown | 28.52 |               |          |        |
| <input checked="" type="checkbox"/> | D10 | GAPDH 8  | Unknown | 27.62 |               |          |        |
| <input checked="" type="checkbox"/> | D11 | GAPDH 8  | Unknown | 29.47 |               |          |        |
| <input checked="" type="checkbox"/> | D12 | GAPDH 8  | Unknown | 26.48 |               |          |        |
| <input checked="" type="checkbox"/> | E1  | FCER1A 5 | Unknown | 28.46 |               |          |        |
| <input checked="" type="checkbox"/> | E2  | FCER1A 5 | Unknown | 26.42 |               |          |        |
| <input checked="" type="checkbox"/> | E3  | FCER1A 5 | Unknown | 26.80 |               |          |        |
| <input checked="" type="checkbox"/> | E4  | FCER1A 6 | Unknown | 26.61 |               |          |        |
| <input checked="" type="checkbox"/> | E5  | FCER1A 6 | Unknown | 22.90 |               |          |        |
| <input checked="" type="checkbox"/> | E6  | FCER1A 6 | Unknown | 27.35 |               |          |        |
| <input checked="" type="checkbox"/> | E7  | FCER1A 7 | Unknown | 25.72 |               |          |        |
| <input checked="" type="checkbox"/> | E8  | FCER1A 7 | Unknown | 24.44 |               |          |        |
| <input checked="" type="checkbox"/> | E9  | FCER1A 7 | Unknown | 28.70 |               |          |        |
| <input checked="" type="checkbox"/> | E10 | FCER1A 8 | Unknown | 26.61 |               |          |        |
| <input checked="" type="checkbox"/> | E11 | FCER1A 8 | Unknown | 25.90 |               |          |        |
| <input checked="" type="checkbox"/> | E12 | FCER1A 8 | Unknown | 26.73 |               |          |        |
| <input checked="" type="checkbox"/> | F1  | RGS1 5   | Unknown | 30.79 |               |          |        |
| <input checked="" type="checkbox"/> | F2  | RGS1 5   | Unknown | 31.22 |               |          |        |
| <input checked="" type="checkbox"/> | F3  | RGS1 5   | Unknown | 31.73 |               |          |        |
| <input checked="" type="checkbox"/> | F4  | RGS1 6   | Unknown | 30.33 |               |          |        |

## Results

| Inc                                 | Pos | Name   | Type    | CP    | Concentration | Standard | Status |
|-------------------------------------|-----|--------|---------|-------|---------------|----------|--------|
| <input checked="" type="checkbox"/> | F5  | RGS1 6 | Unknown | 30.36 |               |          |        |
| <input checked="" type="checkbox"/> | F6  | RGS1 6 | Unknown | 30.59 |               |          |        |
| <input checked="" type="checkbox"/> | F7  | RGS1 7 | Unknown | 29.33 |               |          |        |
| <input checked="" type="checkbox"/> | F8  | RGS1 7 | Unknown | 29.64 |               |          |        |
| <input checked="" type="checkbox"/> | F9  | RGS1 7 | Unknown | 28.93 |               |          |        |
| <input checked="" type="checkbox"/> | F10 | RGS1 8 | Unknown | 28.65 |               |          |        |
| <input checked="" type="checkbox"/> | F11 | RGS1 8 | Unknown | 28.93 |               |          |        |
| <input checked="" type="checkbox"/> | F12 | RGS1 8 | Unknown | 28.88 |               |          |        |
| <input checked="" type="checkbox"/> | G1  | blank  | Unknown | 35.70 |               |          |        |
| <input checked="" type="checkbox"/> | G2  | blank  | Unknown |       |               |          |        |
| <input checked="" type="checkbox"/> | G3  | blank  | Unknown |       |               |          |        |
| <input checked="" type="checkbox"/> | G4  | blank  | Unknown |       |               |          |        |
| <input checked="" type="checkbox"/> | G5  | blank  | Unknown |       |               |          |        |
| <input checked="" type="checkbox"/> | G6  | blank  | Unknown |       |               |          |        |
| <input checked="" type="checkbox"/> | G7  | blank  | Unknown |       |               |          |        |
| <input checked="" type="checkbox"/> | G8  | blank  | Unknown |       |               |          |        |
| <input checked="" type="checkbox"/> | G9  | blank  | Unknown |       |               |          |        |
| <input checked="" type="checkbox"/> | G10 | blank  | Unknown |       |               |          |        |
| <input checked="" type="checkbox"/> | G11 | blank  | Unknown |       |               |          |        |
| <input checked="" type="checkbox"/> | G12 | blank  | Unknown | 37.88 |               |          |        |
| <input checked="" type="checkbox"/> | H1  | blank  | Unknown |       |               |          |        |
| <input checked="" type="checkbox"/> | H2  | blank  | Unknown |       |               |          |        |
| <input checked="" type="checkbox"/> | H3  | blank  | Unknown |       |               |          |        |
| <input checked="" type="checkbox"/> | H4  | blank  | Unknown |       |               |          |        |
| <input checked="" type="checkbox"/> | H5  | blank  | Unknown |       |               |          |        |
| <input checked="" type="checkbox"/> | H6  | blank  | Unknown |       |               |          |        |
| <input checked="" type="checkbox"/> | H7  | blank  | Unknown | 33.44 |               |          |        |
| <input checked="" type="checkbox"/> | H8  | blank  | Unknown |       |               |          |        |
| <input checked="" type="checkbox"/> | H9  | blank  | Unknown |       |               |          |        |
| <input checked="" type="checkbox"/> | H10 | blank  | Unknown |       |               |          |        |
| <input checked="" type="checkbox"/> | H11 | blank  | Unknown |       |               |          |        |
| <input checked="" type="checkbox"/> | H12 | blank  | Unknown |       |               |          |        |

**Amplification Curves**

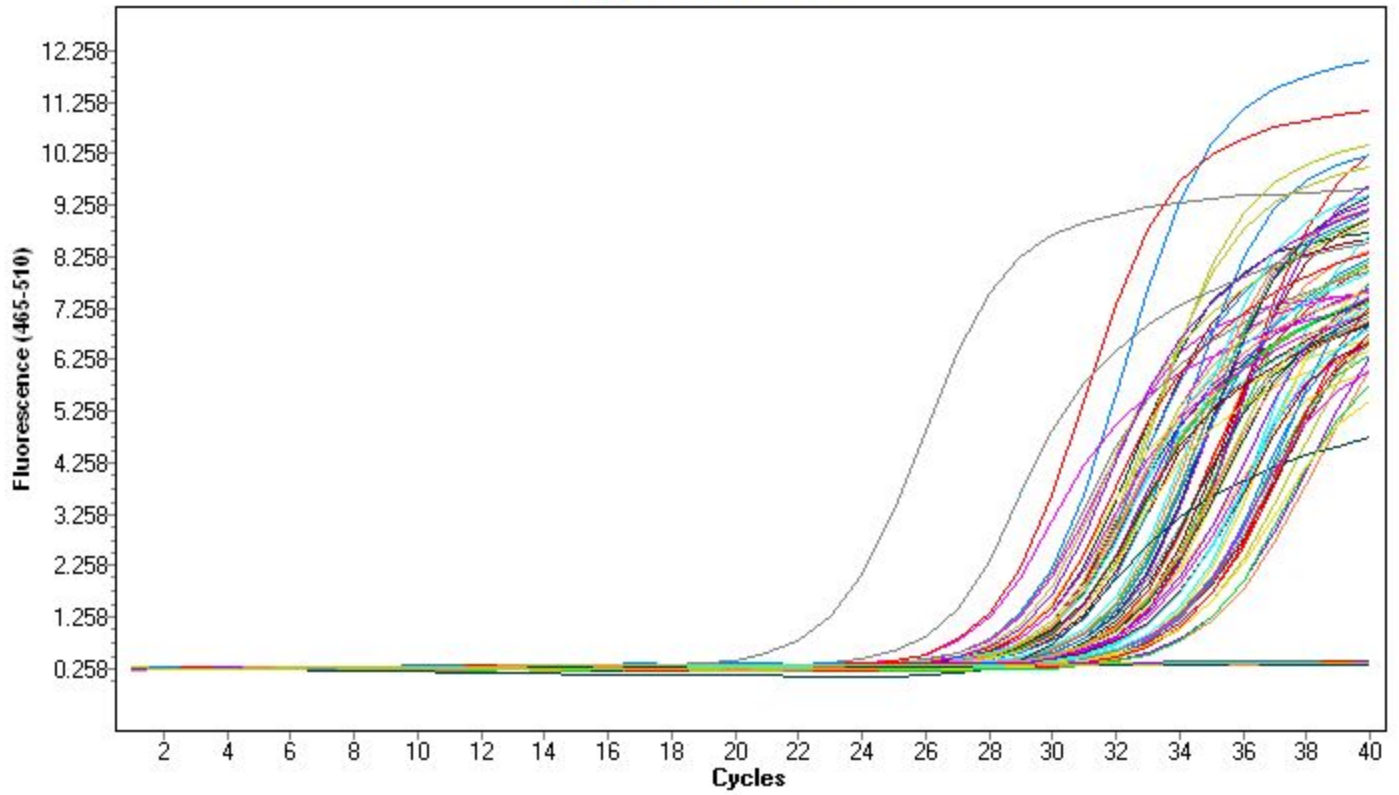

**Amplification Curves**

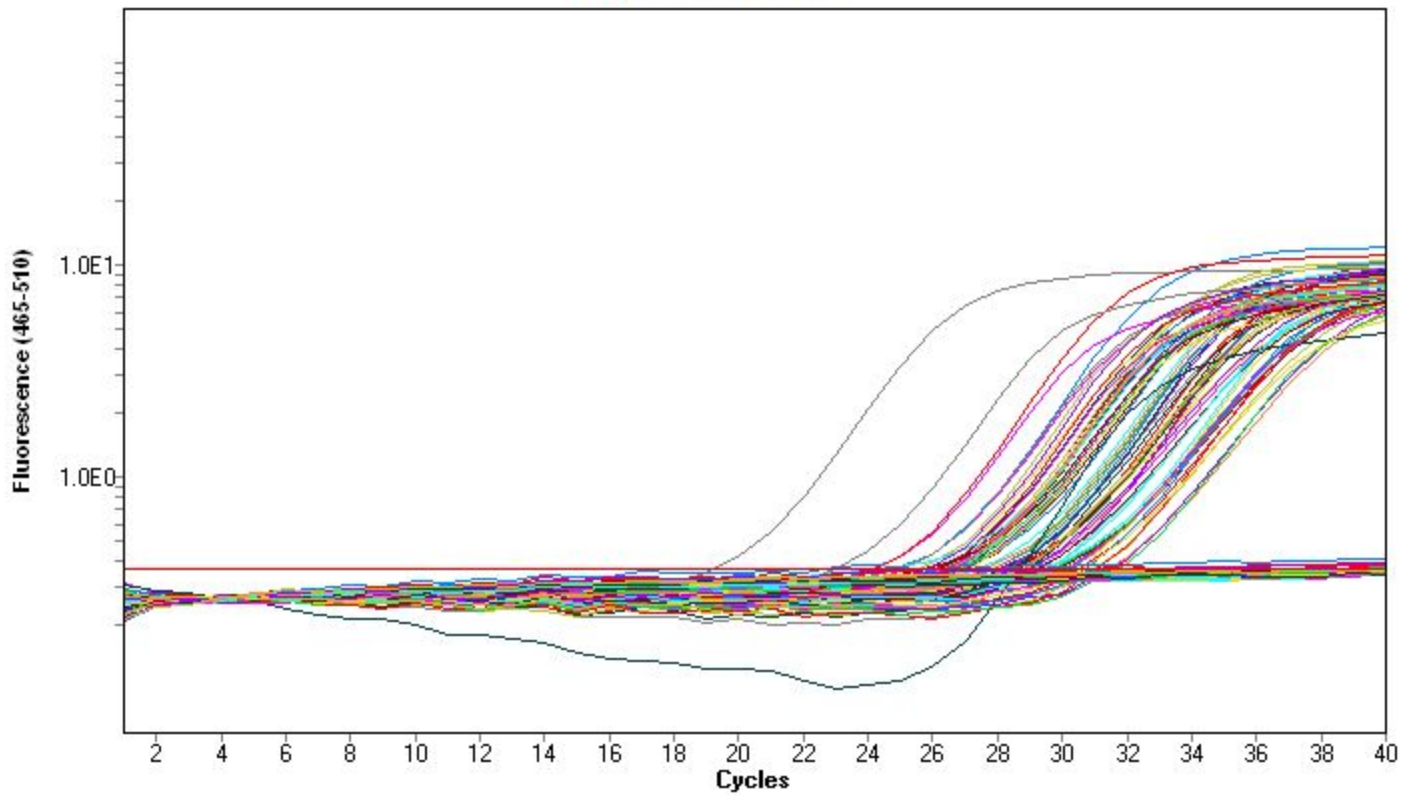



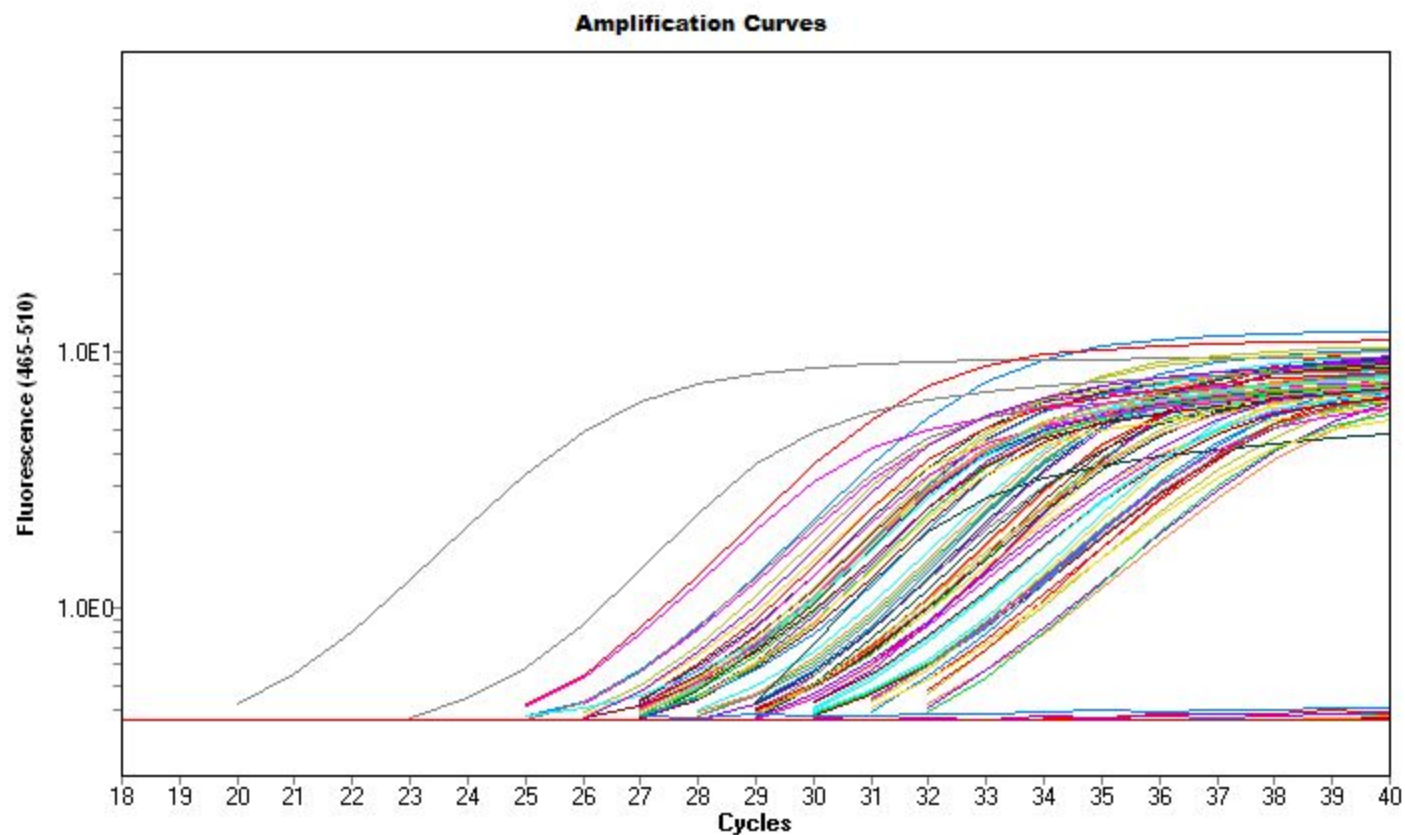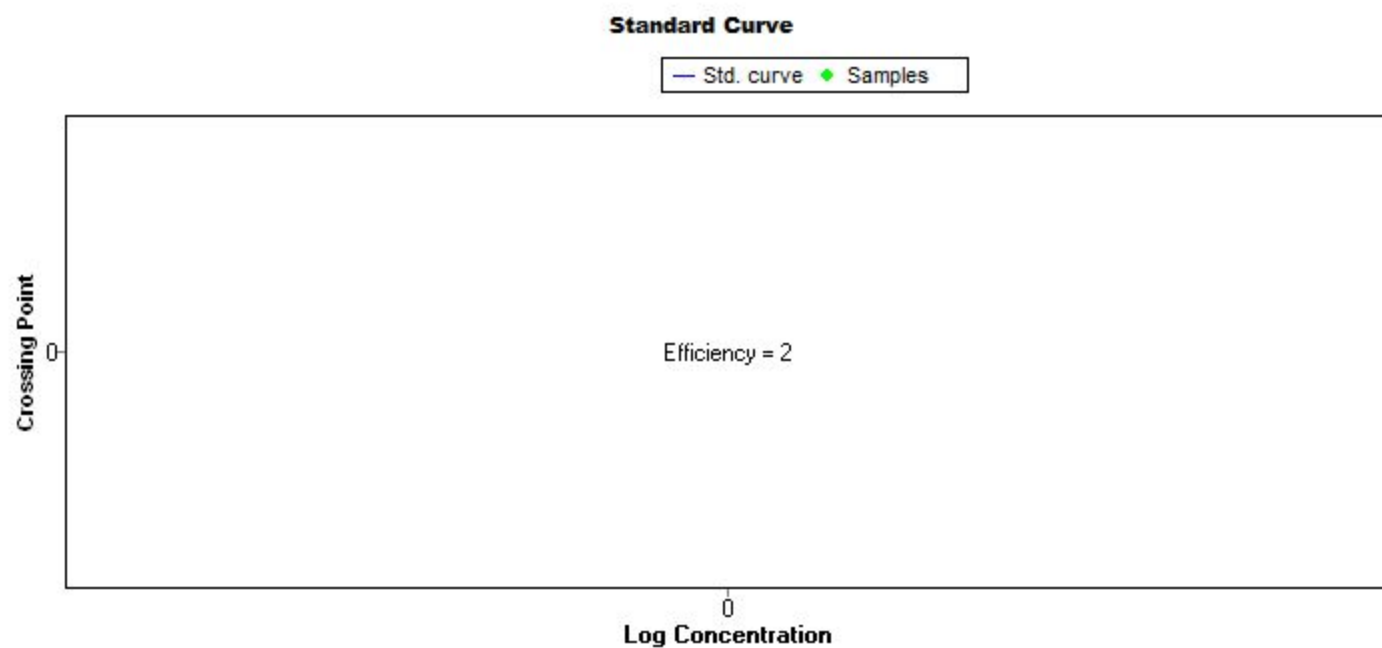

#### Analysis Notes

#### Gene Scanning for All Samples (Gene Scanning)

|                |             |                     |             |
|----------------|-------------|---------------------|-------------|
| Channel        | 465-510     | Color Compensation  | Off         |
| Program Name   | Program     |                     |             |
| Std's Settings | Auto-Group  |                     |             |
| Sensitivity    | 0.30        | Threshold (TmShift) | 5.000       |
| Pre-melt       | 70.43-71.43 | Post-melt Temp      | 88.04-89.04 |

|             |             |
|-------------|-------------|
| Subset Name | All Samples |
|-------------|-------------|

## Results

| Inc                                 | Pos. | Sample Name | Sample Type | Group   | Status |
|-------------------------------------|------|-------------|-------------|---------|--------|
| <input checked="" type="checkbox"/> | A1   | GAPDH 1     | Unknown     | 3       |        |
| <input checked="" type="checkbox"/> | A2   | GAPDH 1     | Unknown     | 2       |        |
| <input checked="" type="checkbox"/> | A3   | GAPDH 1     | Unknown     | Unknown |        |
| <input checked="" type="checkbox"/> | A4   | GAPDH 2     | Unknown     | Unknown |        |
| <input checked="" type="checkbox"/> | A5   | GAPDH 2     | Unknown     | Unknown |        |
| <input checked="" type="checkbox"/> | A6   | GAPDH 2     | Unknown     | 2       |        |
| <input checked="" type="checkbox"/> | A7   | GAPDH 3     | Unknown     | Unknown |        |
| <input checked="" type="checkbox"/> | A8   | GAPDH 3     | Unknown     | Unknown |        |
| <input checked="" type="checkbox"/> | A9   | GAPDH 3     | Unknown     | Unknown |        |
| <input checked="" type="checkbox"/> | A10  | GAPDH 4     | Unknown     | 2       |        |
| <input checked="" type="checkbox"/> | A11  | GAPDH 4     | Unknown     | 2       |        |
| <input checked="" type="checkbox"/> | A12  | GAPDH 4     | Unknown     | 2       |        |
| <input checked="" type="checkbox"/> | B1   | FCER1A 1    | Unknown     | 3       |        |
| <input checked="" type="checkbox"/> | B2   | FCER1A 1    | Unknown     | 4       |        |
| <input checked="" type="checkbox"/> | B3   | FCER1A 1    | Unknown     | 3       |        |
| <input checked="" type="checkbox"/> | B4   | FCER1A 2    | Unknown     | 3       |        |
| <input checked="" type="checkbox"/> | B5   | FCER1A 2    | Unknown     | 4       |        |
| <input checked="" type="checkbox"/> | B6   | FCER1A 2    | Unknown     | Unknown |        |
| <input checked="" type="checkbox"/> | B7   | FCER1A 3    | Unknown     | 4       |        |
| <input checked="" type="checkbox"/> | B8   | FCER1A 3    | Unknown     | 6       |        |
| <input checked="" type="checkbox"/> | B9   | FCER1A 3    | Unknown     | Unknown |        |
| <input checked="" type="checkbox"/> | B10  | FCER1A 4    | Unknown     | 4       |        |
| <input checked="" type="checkbox"/> | B11  | FCER1A 4    | Unknown     | Unknown |        |
| <input checked="" type="checkbox"/> | B12  | FCER1A 4    | Unknown     | 3       |        |
| <input checked="" type="checkbox"/> | C1   | RGS1 1      | Unknown     | Unknown |        |
| <input checked="" type="checkbox"/> | C2   | RGS1 1      | Unknown     | 1       |        |
| <input checked="" type="checkbox"/> | C3   | RGS1 1      | Unknown     | Unknown |        |
| <input checked="" type="checkbox"/> | C4   | RGS1 2      | Unknown     | 1       |        |
| <input checked="" type="checkbox"/> | C5   | RGS1 2      | Unknown     | 1       |        |
| <input checked="" type="checkbox"/> | C6   | RGS1 2      | Unknown     | Unknown |        |
| <input checked="" type="checkbox"/> | C7   | RGS1 3      | Unknown     | 1       |        |

## Results

| Inc                                 | Pos. | Sample Name | Sample Type | Group   | Status |
|-------------------------------------|------|-------------|-------------|---------|--------|
| <input checked="" type="checkbox"/> | C8   | RGS1 3      | Unknown     | 1       |        |
| <input checked="" type="checkbox"/> | C9   | RGS1 3      | Unknown     | 5       |        |
| <input checked="" type="checkbox"/> | C10  | RGS1 4      | Unknown     | 1       |        |
| <input checked="" type="checkbox"/> | C11  | RGS1 4      | Unknown     | 1       |        |
| <input checked="" type="checkbox"/> | C12  | RGS1 4      | Unknown     | 1       |        |
| <input checked="" type="checkbox"/> | D1   | GAPDH 4     | Unknown     | 2       |        |
| <input checked="" type="checkbox"/> | D2   | GAPDH 4     | Unknown     | Unknown |        |
| <input checked="" type="checkbox"/> | D3   | GAPDH 4     | Unknown     | 2       |        |
| <input checked="" type="checkbox"/> | D4   | GAPDH 5     | Unknown     | 2       |        |
| <input checked="" type="checkbox"/> | D5   | GAPDH 5     | Unknown     | 2       |        |
| <input checked="" type="checkbox"/> | D6   | GAPDH 5     | Unknown     | 2       |        |
| <input checked="" type="checkbox"/> | D7   | GAPDH 6     | Unknown     | 2       |        |
| <input checked="" type="checkbox"/> | D8   | GAPDH 6     | Unknown     | 2       |        |
| <input checked="" type="checkbox"/> | D9   | GAPDH 6     | Unknown     | Unknown |        |
| <input checked="" type="checkbox"/> | D10  | GAPDH 8     | Unknown     | Unknown |        |
| <input checked="" type="checkbox"/> | D11  | GAPDH 8     | Unknown     | Unknown |        |
| <input checked="" type="checkbox"/> | D12  | GAPDH 8     | Unknown     | Unknown |        |
| <input checked="" type="checkbox"/> | E1   | FCER1A 5    | Unknown     | 3       |        |
| <input checked="" type="checkbox"/> | E2   | FCER1A 5    | Unknown     | 3       |        |
| <input checked="" type="checkbox"/> | E3   | FCER1A 5    | Unknown     | 3       |        |
| <input checked="" type="checkbox"/> | E4   | FCER1A 6    | Unknown     | 6       |        |
| <input checked="" type="checkbox"/> | E5   | FCER1A 6    | Unknown     | Unknown |        |
| <input checked="" type="checkbox"/> | E6   | FCER1A 6    | Unknown     | 4       |        |
| <input checked="" type="checkbox"/> | E7   | FCER1A 7    | Unknown     | 4       |        |
| <input checked="" type="checkbox"/> | E8   | FCER1A 7    | Unknown     | 4       |        |
| <input checked="" type="checkbox"/> | E9   | FCER1A 7    | Unknown     | Unknown |        |
| <input checked="" type="checkbox"/> | E10  | FCER1A 8    | Unknown     | 3       |        |
| <input checked="" type="checkbox"/> | E11  | FCER1A 8    | Unknown     | 3       |        |
| <input checked="" type="checkbox"/> | E12  | FCER1A 8    | Unknown     | 3       |        |
| <input checked="" type="checkbox"/> | F1   | RGS1 5      | Unknown     | 5       |        |
| <input checked="" type="checkbox"/> | F2   | RGS1 5      | Unknown     | 5       |        |
| <input checked="" type="checkbox"/> | F3   | RGS1 5      | Unknown     | 5       |        |
| <input checked="" type="checkbox"/> | F4   | RGS1 6      | Unknown     | 1       |        |
| <input checked="" type="checkbox"/> | F5   | RGS1 6      | Unknown     | 1       |        |
| <input checked="" type="checkbox"/> | F6   | RGS1 6      | Unknown     | 1       |        |
| <input checked="" type="checkbox"/> | F7   | RGS1 7      | Unknown     | 1       |        |
| <input checked="" type="checkbox"/> | F8   | RGS1 7      | Unknown     | 1       |        |
| <input checked="" type="checkbox"/> | F9   | RGS1 7      | Unknown     | 1       |        |

## Results

| Inc                                 | Pos. | Sample Name | Sample Type | Group    | Status |
|-------------------------------------|------|-------------|-------------|----------|--------|
| <input checked="" type="checkbox"/> | F10  | RGS1 8      | Unknown     | Unknown  |        |
| <input checked="" type="checkbox"/> | F11  | RGS1 8      | Unknown     | Unknown  |        |
| <input checked="" type="checkbox"/> | F12  | RGS1 8      | Unknown     | 1        |        |
| <input checked="" type="checkbox"/> | G1   | blank       | Unknown     | Negative |        |
| <input checked="" type="checkbox"/> | G2   | blank       | Unknown     | Negative |        |
| <input checked="" type="checkbox"/> | G3   | blank       | Unknown     | Negative |        |
| <input checked="" type="checkbox"/> | G4   | blank       | Unknown     | Negative |        |
| <input checked="" type="checkbox"/> | G5   | blank       | Unknown     | Negative |        |
| <input checked="" type="checkbox"/> | G6   | blank       | Unknown     | Negative |        |
| <input checked="" type="checkbox"/> | G7   | blank       | Unknown     | Negative |        |
| <input checked="" type="checkbox"/> | G8   | blank       | Unknown     | Negative |        |
| <input checked="" type="checkbox"/> | G9   | blank       | Unknown     | Negative |        |
| <input checked="" type="checkbox"/> | G10  | blank       | Unknown     | Negative |        |
| <input checked="" type="checkbox"/> | G11  | blank       | Unknown     | Negative |        |
| <input checked="" type="checkbox"/> | G12  | blank       | Unknown     | Negative |        |
| <input checked="" type="checkbox"/> | H1   | blank       | Unknown     | Negative |        |
| <input checked="" type="checkbox"/> | H2   | blank       | Unknown     | Negative |        |
| <input checked="" type="checkbox"/> | H3   | blank       | Unknown     | Negative |        |
| <input checked="" type="checkbox"/> | H4   | blank       | Unknown     | Negative |        |
| <input checked="" type="checkbox"/> | H5   | blank       | Unknown     | Negative |        |
| <input checked="" type="checkbox"/> | H6   | blank       | Unknown     | Negative |        |
| <input checked="" type="checkbox"/> | H7   | blank       | Unknown     | Negative |        |
| <input checked="" type="checkbox"/> | H8   | blank       | Unknown     | Negative |        |
| <input checked="" type="checkbox"/> | H9   | blank       | Unknown     | Negative |        |
| <input checked="" type="checkbox"/> | H10  | blank       | Unknown     | Negative |        |
| <input checked="" type="checkbox"/> | H11  | blank       | Unknown     | Negative |        |
| <input checked="" type="checkbox"/> | H12  | blank       | Unknown     | Negative |        |

## Group 1

| Inc                                 | Pos | Sample Name | Sample Type |
|-------------------------------------|-----|-------------|-------------|
| <input checked="" type="checkbox"/> | C2  | RGS1 1      | Unknown     |
| <input checked="" type="checkbox"/> | C4  | RGS1 2      | Unknown     |
| <input checked="" type="checkbox"/> | C5  | RGS1 2      | Unknown     |
| <input checked="" type="checkbox"/> | C7  | RGS1 3      | Unknown     |
| <input checked="" type="checkbox"/> | C8  | RGS1 3      | Unknown     |
| <input checked="" type="checkbox"/> | C10 | RGS1 4      | Unknown     |
| <input checked="" type="checkbox"/> | C11 | RGS1 4      | Unknown     |
| <input checked="" type="checkbox"/> | C12 | RGS1 4      | Unknown     |
| <input checked="" type="checkbox"/> | F4  | RGS1 6      | Unknown     |

| <b>Group 1</b>                      |     |             |             |
|-------------------------------------|-----|-------------|-------------|
| Inc                                 | Pos | Sample Name | Sample Type |
| <input checked="" type="checkbox"/> | F5  | RGS1 6      | Unknown     |
| <input checked="" type="checkbox"/> | F6  | RGS1 6      | Unknown     |
| <input checked="" type="checkbox"/> | F7  | RGS1 7      | Unknown     |
| <input checked="" type="checkbox"/> | F8  | RGS1 7      | Unknown     |
| <input checked="" type="checkbox"/> | F9  | RGS1 7      | Unknown     |
| <input checked="" type="checkbox"/> | F12 | RGS1 8      | Unknown     |
| <b>Group 2</b>                      |     |             |             |
| Inc                                 | Pos | Sample Name | Sample Type |
| <input checked="" type="checkbox"/> | A2  | GAPDH 1     | Unknown     |
| <input checked="" type="checkbox"/> | A6  | GAPDH 2     | Unknown     |
| <input checked="" type="checkbox"/> | A10 | GAPDH 4     | Unknown     |
| <input checked="" type="checkbox"/> | A11 | GAPDH 4     | Unknown     |
| <input checked="" type="checkbox"/> | A12 | GAPDH 4     | Unknown     |
| <input checked="" type="checkbox"/> | D1  | GAPDH 4     | Unknown     |
| <input checked="" type="checkbox"/> | D3  | GAPDH 4     | Unknown     |
| <input checked="" type="checkbox"/> | D4  | GAPDH 5     | Unknown     |
| <input checked="" type="checkbox"/> | D5  | GAPDH 5     | Unknown     |
| <input checked="" type="checkbox"/> | D6  | GAPDH 5     | Unknown     |
| <input checked="" type="checkbox"/> | D7  | GAPDH 6     | Unknown     |
| <input checked="" type="checkbox"/> | D8  | GAPDH 6     | Unknown     |
| <b>Group 3</b>                      |     |             |             |
| Inc                                 | Pos | Sample Name | Sample Type |
| <input checked="" type="checkbox"/> | A1  | GAPDH 1     | Unknown     |
| <input checked="" type="checkbox"/> | B1  | FCER1A 1    | Unknown     |
| <input checked="" type="checkbox"/> | B3  | FCER1A 1    | Unknown     |
| <input checked="" type="checkbox"/> | B4  | FCER1A 2    | Unknown     |
| <input checked="" type="checkbox"/> | B12 | FCER1A 4    | Unknown     |
| <input checked="" type="checkbox"/> | E1  | FCER1A 5    | Unknown     |
| <input checked="" type="checkbox"/> | E2  | FCER1A 5    | Unknown     |
| <input checked="" type="checkbox"/> | E3  | FCER1A 5    | Unknown     |
| <input checked="" type="checkbox"/> | E10 | FCER1A 8    | Unknown     |
| <input checked="" type="checkbox"/> | E11 | FCER1A 8    | Unknown     |
| <input checked="" type="checkbox"/> | E12 | FCER1A 8    | Unknown     |
| <b>Group 4</b>                      |     |             |             |
| Inc                                 | Pos | Sample Name | Sample Type |
| <input checked="" type="checkbox"/> | B2  | FCER1A 1    | Unknown     |
| <input checked="" type="checkbox"/> | B5  | FCER1A 2    | Unknown     |

| <b>Group</b> 4                      |     |             |             |
|-------------------------------------|-----|-------------|-------------|
| Inc                                 | Pos | Sample Name | Sample Type |
| <input checked="" type="checkbox"/> | B7  | FCER1A 3    | Unknown     |
| <input checked="" type="checkbox"/> | B10 | FCER1A 4    | Unknown     |
| <input checked="" type="checkbox"/> | E6  | FCER1A 6    | Unknown     |
| <input checked="" type="checkbox"/> | E7  | FCER1A 7    | Unknown     |
| <input checked="" type="checkbox"/> | E8  | FCER1A 7    | Unknown     |
| <b>Group</b> 5                      |     |             |             |
| Inc                                 | Pos | Sample Name | Sample Type |
| <input checked="" type="checkbox"/> | C9  | RGS1 3      | Unknown     |
| <input checked="" type="checkbox"/> | F1  | RGS1 5      | Unknown     |
| <input checked="" type="checkbox"/> | F2  | RGS1 5      | Unknown     |
| <input checked="" type="checkbox"/> | F3  | RGS1 5      | Unknown     |
| <b>Group</b> 6                      |     |             |             |
| Inc                                 | Pos | Sample Name | Sample Type |
| <input checked="" type="checkbox"/> | B8  | FCER1A 3    | Unknown     |
| <input checked="" type="checkbox"/> | E4  | FCER1A 6    | Unknown     |
| <b>Group</b> Negative               |     |             |             |
| Inc                                 | Pos | Sample Name | Sample Type |
| <input checked="" type="checkbox"/> | G1  | blank       | Unknown     |
| <input checked="" type="checkbox"/> | G2  | blank       | Unknown     |
| <input checked="" type="checkbox"/> | G3  | blank       | Unknown     |
| <input checked="" type="checkbox"/> | G4  | blank       | Unknown     |
| <input checked="" type="checkbox"/> | G5  | blank       | Unknown     |
| <input checked="" type="checkbox"/> | G6  | blank       | Unknown     |
| <input checked="" type="checkbox"/> | G7  | blank       | Unknown     |
| <input checked="" type="checkbox"/> | G8  | blank       | Unknown     |
| <input checked="" type="checkbox"/> | G9  | blank       | Unknown     |
| <input checked="" type="checkbox"/> | G10 | blank       | Unknown     |
| <input checked="" type="checkbox"/> | G11 | blank       | Unknown     |
| <input checked="" type="checkbox"/> | G12 | blank       | Unknown     |
| <input checked="" type="checkbox"/> | H1  | blank       | Unknown     |
| <input checked="" type="checkbox"/> | H2  | blank       | Unknown     |
| <input checked="" type="checkbox"/> | H3  | blank       | Unknown     |
| <input checked="" type="checkbox"/> | H4  | blank       | Unknown     |
| <input checked="" type="checkbox"/> | H5  | blank       | Unknown     |
| <input checked="" type="checkbox"/> | H6  | blank       | Unknown     |
| <input checked="" type="checkbox"/> | H7  | blank       | Unknown     |
| <input checked="" type="checkbox"/> | H8  | blank       | Unknown     |

| Group Negative                      |     |             |             |
|-------------------------------------|-----|-------------|-------------|
| Inc                                 | Pos | Sample Name | Sample Type |
| <input checked="" type="checkbox"/> | H9  | blank       | Unknown     |
| <input checked="" type="checkbox"/> | H10 | blank       | Unknown     |
| <input checked="" type="checkbox"/> | H11 | blank       | Unknown     |
| <input checked="" type="checkbox"/> | H12 | blank       | Unknown     |

  

| Group Unknown                       |     |             |             |
|-------------------------------------|-----|-------------|-------------|
| Inc                                 | Pos | Sample Name | Sample Type |
| <input checked="" type="checkbox"/> | A3  | GAPDH 1     | Unknown     |
| <input checked="" type="checkbox"/> | A4  | GAPDH 2     | Unknown     |
| <input checked="" type="checkbox"/> | A5  | GAPDH 2     | Unknown     |
| <input checked="" type="checkbox"/> | A7  | GAPDH 3     | Unknown     |
| <input checked="" type="checkbox"/> | A8  | GAPDH 3     | Unknown     |
| <input checked="" type="checkbox"/> | A9  | GAPDH 3     | Unknown     |
| <input checked="" type="checkbox"/> | B6  | FCER1A 2    | Unknown     |
| <input checked="" type="checkbox"/> | B9  | FCER1A 3    | Unknown     |
| <input checked="" type="checkbox"/> | B11 | FCER1A 4    | Unknown     |
| <input checked="" type="checkbox"/> | C1  | RGS1 1      | Unknown     |
| <input checked="" type="checkbox"/> | C3  | RGS1 1      | Unknown     |
| <input checked="" type="checkbox"/> | C6  | RGS1 2      | Unknown     |
| <input checked="" type="checkbox"/> | D2  | GAPDH 4     | Unknown     |
| <input checked="" type="checkbox"/> | D9  | GAPDH 6     | Unknown     |
| <input checked="" type="checkbox"/> | D10 | GAPDH 8     | Unknown     |
| <input checked="" type="checkbox"/> | D11 | GAPDH 8     | Unknown     |
| <input checked="" type="checkbox"/> | D12 | GAPDH 8     | Unknown     |
| <input checked="" type="checkbox"/> | E5  | FCER1A 6    | Unknown     |
| <input checked="" type="checkbox"/> | E9  | FCER1A 7    | Unknown     |
| <input checked="" type="checkbox"/> | F10 | RGS1 8      | Unknown     |
| <input checked="" type="checkbox"/> | F11 | RGS1 8      | Unknown     |

**Melting Curves**

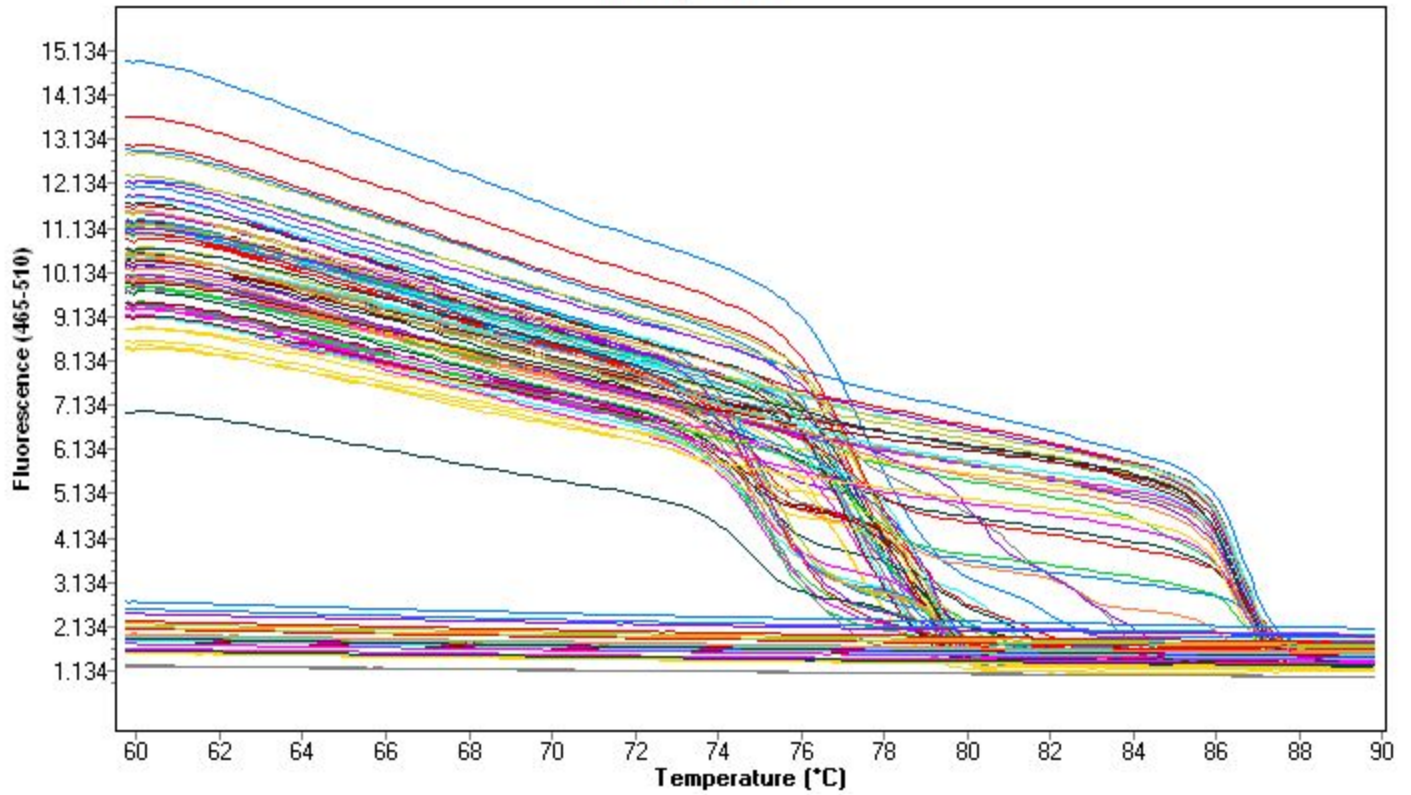

**Normalized Melting Curves**

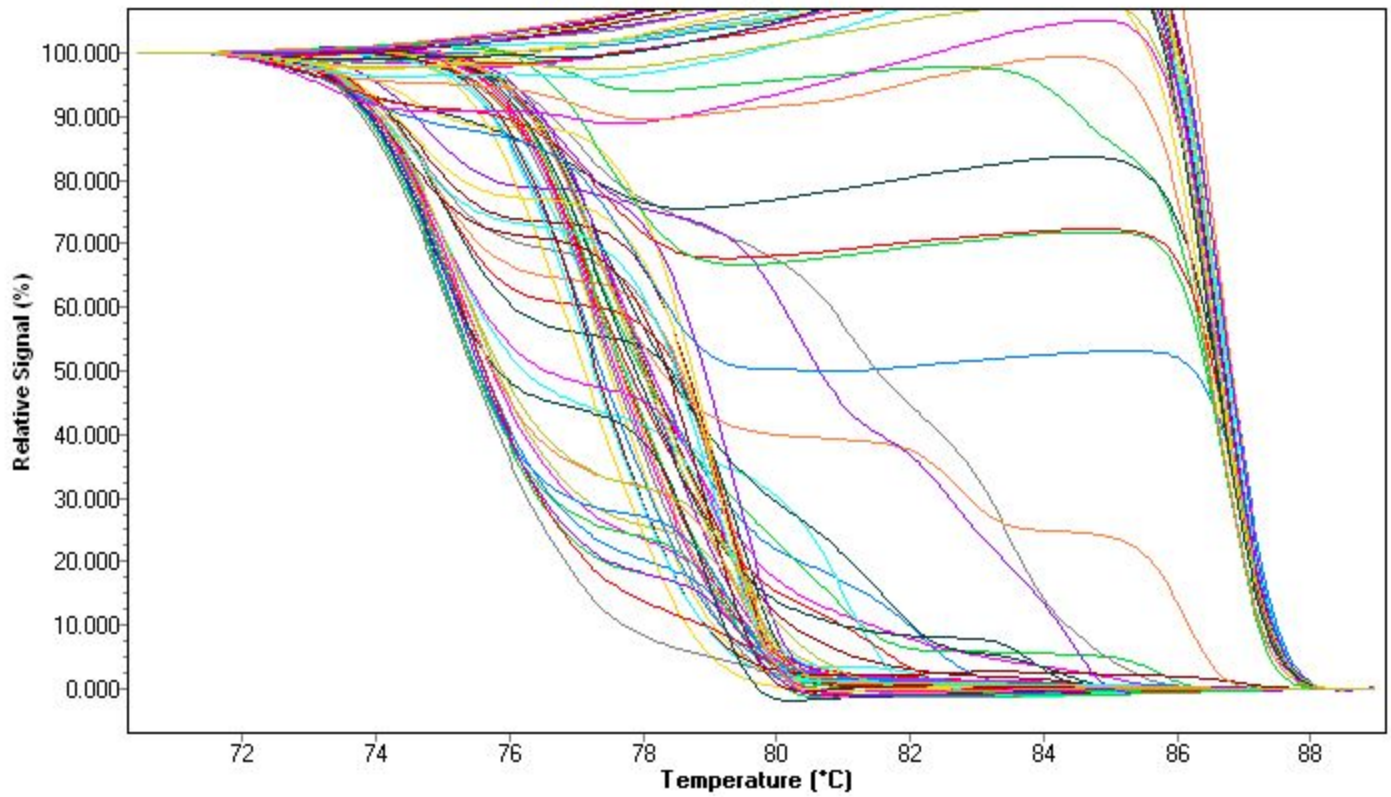



**Normalized and Shifted Melting Curves**

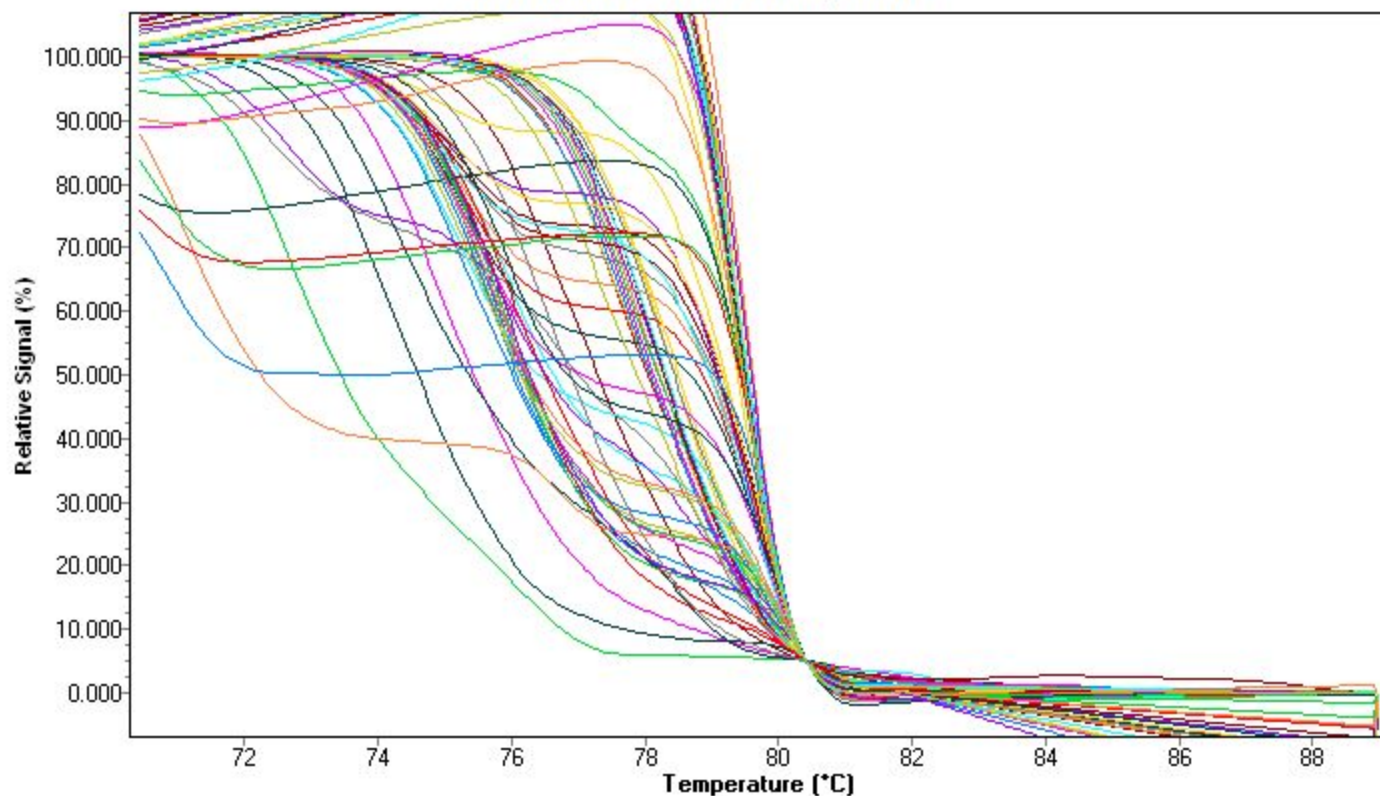

**Normalized and Temp-Shifted Difference Plot**

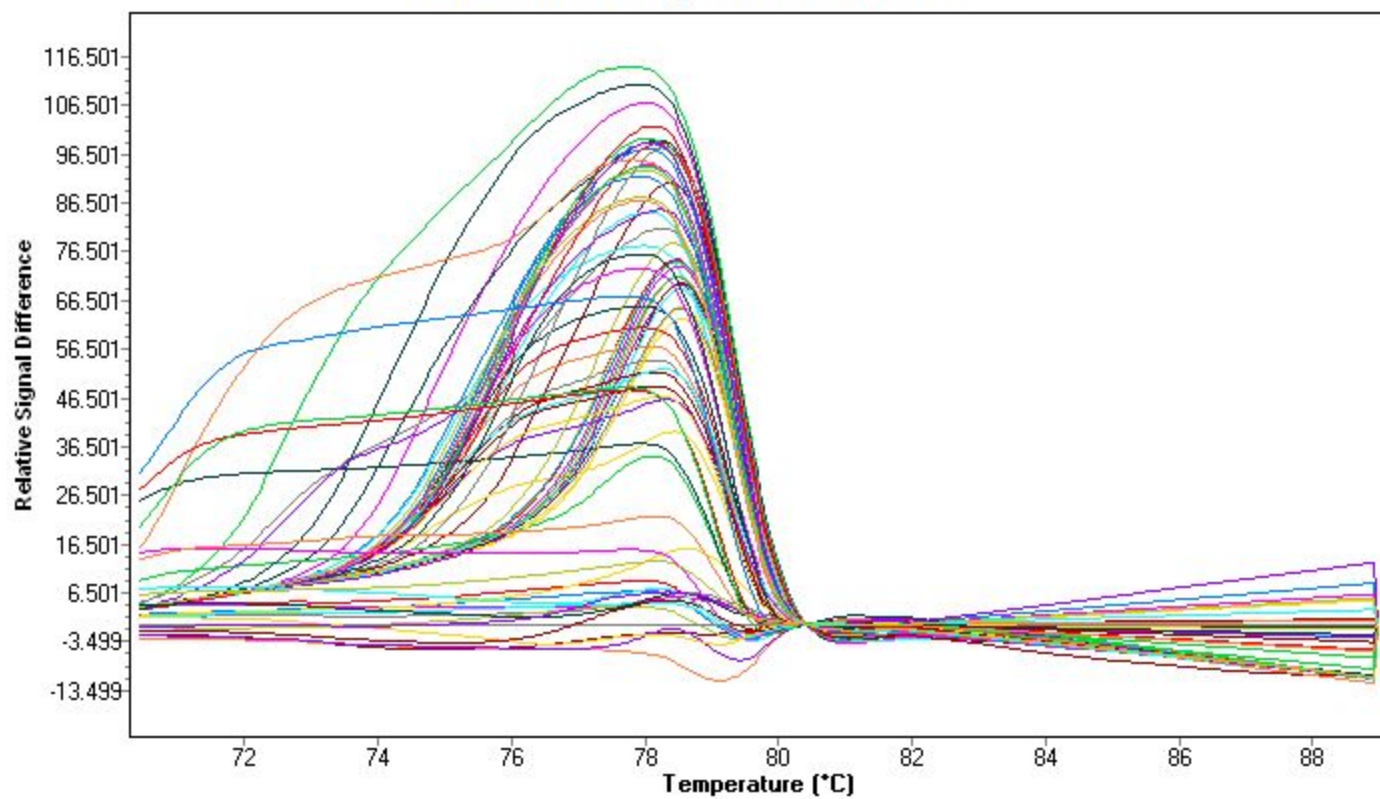

**Analysis Notes**

## Melt Curve Genotyping for All Samples (Melt Curve Genotyping)

|                |            |                    |       |
|----------------|------------|--------------------|-------|
| Channel        | 465-510    | Color Compensation | Off   |
| Program Name   | Program    |                    |       |
| Std's Settings | Auto-Group |                    |       |
| Sensitivity    | Normal     | Temp Range         | 62-86 |
| Score          | 0.7        | Res                | 0.1   |

|             |             |
|-------------|-------------|
| Subset Name | All Samples |
|-------------|-------------|

### Results

| Inc                                 | Pos. | Sample Name | Sample Type | Group   | Score | Resolution | Status |
|-------------------------------------|------|-------------|-------------|---------|-------|------------|--------|
| <input checked="" type="checkbox"/> | A1   | GAPDH 1     | Unknown     | 1       | 0.98  | 0.39       |        |
| <input checked="" type="checkbox"/> | A2   | GAPDH 1     | Unknown     | 1       | 0.95  | 0.62       |        |
| <input checked="" type="checkbox"/> | A3   | GAPDH 1     | Unknown     | 1       | 0.98  | 0.41       |        |
| <input checked="" type="checkbox"/> | A4   | GAPDH 2     | Unknown     | 1       | 0.98  | 0.50       |        |
| <input checked="" type="checkbox"/> | A5   | GAPDH 2     | Unknown     | 3       | 1.00  | 0.51       |        |
| <input checked="" type="checkbox"/> | A6   | GAPDH 2     | Unknown     | 1       | 0.93  | 0.66       |        |
| <input checked="" type="checkbox"/> | A7   | GAPDH 3     | Unknown     | 1       | 0.98  | 0.53       |        |
| <input checked="" type="checkbox"/> | A8   | GAPDH 3     | Unknown     | 1       | 0.91  | 0.22       |        |
| <input checked="" type="checkbox"/> | A9   | GAPDH 3     | Unknown     | 1       | 0.96  | 0.28       |        |
| <input checked="" type="checkbox"/> | A10  | GAPDH 4     | Unknown     | 1       | 0.93  | 0.63       |        |
| <input checked="" type="checkbox"/> | A11  | GAPDH 4     | Unknown     | 1       | 0.94  | 0.58       |        |
| <input checked="" type="checkbox"/> | A12  | GAPDH 4     | Unknown     | 1       | 0.96  | 0.57       |        |
| <input checked="" type="checkbox"/> | B1   | FCER1A 1    | Unknown     | 1       | 0.98  | 0.82       |        |
| <input checked="" type="checkbox"/> | B2   | FCER1A 1    | Unknown     | Unknown | 0.63  | 0.07       |        |
| <input checked="" type="checkbox"/> | B3   | FCER1A 1    | Unknown     | 1       | 0.96  | 0.82       |        |
| <input checked="" type="checkbox"/> | B4   | FCER1A 2    | Unknown     | 1       | 0.96  | 0.77       |        |
| <input checked="" type="checkbox"/> | B5   | FCER1A 2    | Unknown     | Unknown | 0.67  | 0.05       |        |
| <input checked="" type="checkbox"/> | B6   | FCER1A 2    | Unknown     | 1       | 0.83  | 0.36       |        |
| <input checked="" type="checkbox"/> | B7   | FCER1A 3    | Unknown     | Unknown | 0.67  | 0.05       |        |
| <input checked="" type="checkbox"/> | B8   | FCER1A 3    | Unknown     | 1       | 0.79  | 0.38       |        |
| <input checked="" type="checkbox"/> | B9   | FCER1A 3    | Unknown     | Unknown | 0.65  | 0.09       |        |
| <input checked="" type="checkbox"/> | B10  | FCER1A 4    | Unknown     | Unknown | 0.62  |            |        |
| <input checked="" type="checkbox"/> | B11  | FCER1A 4    | Unknown     | Unknown | 0.73  | 0.08       |        |
| <input checked="" type="checkbox"/> | B12  | FCER1A 4    | Unknown     | 1       | 0.95  | 0.75       |        |
| <input checked="" type="checkbox"/> | C1   | RGS1 1      | Unknown     | 2       | 0.99  | 0.72       |        |
| <input checked="" type="checkbox"/> | C2   | RGS1 1      | Unknown     | 2       | 1.00  | 0.77       |        |
| <input checked="" type="checkbox"/> | C3   | RGS1 1      | Unknown     | 2       | 0.89  | 0.42       |        |
| <input checked="" type="checkbox"/> | C4   | RGS1 2      | Unknown     | 2       | 0.99  | 0.75       |        |
| <input checked="" type="checkbox"/> | C5   | RGS1 2      | Unknown     | 2       | 0.99  | 0.74       |        |
| <input checked="" type="checkbox"/> | C6   | RGS1 2      | Unknown     | 2       | 0.98  | 0.78       |        |
| <input checked="" type="checkbox"/> | C7   | RGS1 3      | Unknown     | 2       | 0.97  | 0.84       |        |

## Results

| Inc                                 | Pos. | Sample Name | Sample Type | Group   | Score | Resolution | Status |
|-------------------------------------|------|-------------|-------------|---------|-------|------------|--------|
| <input checked="" type="checkbox"/> | C8   | RGS1 3      | Unknown     | 2       | 0.99  | 0.77       |        |
| <input checked="" type="checkbox"/> | C9   | RGS1 3      | Unknown     | 2       | 0.88  | 0.49       |        |
| <input checked="" type="checkbox"/> | C10  | RGS1 4      | Unknown     | 2       | 0.97  | 0.82       |        |
| <input checked="" type="checkbox"/> | C11  | RGS1 4      | Unknown     | 2       | 0.97  | 0.80       |        |
| <input checked="" type="checkbox"/> | C12  | RGS1 4      | Unknown     | 2       | 0.98  | 0.80       |        |
| <input checked="" type="checkbox"/> | D1   | GAPDH 4     | Unknown     | 1       | 0.95  | 0.67       |        |
| <input checked="" type="checkbox"/> | D2   | GAPDH 4     | Unknown     | 1       | 1.00  | 0.51       |        |
| <input checked="" type="checkbox"/> | D3   | GAPDH 4     | Unknown     | 1       | 0.96  | 0.61       |        |
| <input checked="" type="checkbox"/> | D4   | GAPDH 5     | Unknown     | 1       | 0.94  | 0.63       |        |
| <input checked="" type="checkbox"/> | D5   | GAPDH 5     | Unknown     | 1       | 0.94  | 0.65       |        |
| <input checked="" type="checkbox"/> | D6   | GAPDH 5     | Unknown     | 1       | 0.93  | 0.72       |        |
| <input checked="" type="checkbox"/> | D7   | GAPDH 6     | Unknown     | 1       | 0.93  | 0.69       |        |
| <input checked="" type="checkbox"/> | D8   | GAPDH 6     | Unknown     | 1       | 0.94  | 0.69       |        |
| <input checked="" type="checkbox"/> | D9   | GAPDH 6     | Unknown     | 1       | 0.98  | 0.52       |        |
| <input checked="" type="checkbox"/> | D10  | GAPDH 8     | Unknown     | 1       | 0.81  | 0.18       |        |
| <input checked="" type="checkbox"/> | D11  | GAPDH 8     | Unknown     | 3       | 0.98  | 0.34       |        |
| <input checked="" type="checkbox"/> | D12  | GAPDH 8     | Unknown     | 1       | 0.97  | 0.56       |        |
| <input checked="" type="checkbox"/> | E1   | FCER1A 5    | Unknown     | 1       | 0.91  | 0.70       |        |
| <input checked="" type="checkbox"/> | E2   | FCER1A 5    | Unknown     | 1       | 0.98  | 0.84       |        |
| <input checked="" type="checkbox"/> | E3   | FCER1A 5    | Unknown     | 1       | 0.94  | 0.76       |        |
| <input checked="" type="checkbox"/> | E4   | FCER1A 6    | Unknown     | 1       | 0.73  | 0.30       |        |
| <input checked="" type="checkbox"/> | E5   | FCER1A 6    | Unknown     | 1       | 0.95  | 0.86       |        |
| <input checked="" type="checkbox"/> | E6   | FCER1A 6    | Unknown     | 1       | 0.73  | 0.15       |        |
| <input checked="" type="checkbox"/> | E7   | FCER1A 7    | Unknown     | 1       | 0.70  | 0.15       |        |
| <input checked="" type="checkbox"/> | E8   | FCER1A 7    | Unknown     | 1       | 0.75  | 0.19       |        |
| <input checked="" type="checkbox"/> | E9   | FCER1A 7    | Unknown     | 1       | 0.80  | 0.53       |        |
| <input checked="" type="checkbox"/> | E10  | FCER1A 8    | Unknown     | 1       | 0.88  | 0.61       |        |
| <input checked="" type="checkbox"/> | E11  | FCER1A 8    | Unknown     | 1       | 0.97  | 0.81       |        |
| <input checked="" type="checkbox"/> | E12  | FCER1A 8    | Unknown     | 1       | 0.90  | 0.65       |        |
| <input checked="" type="checkbox"/> | F1   | RGS1 5      | Unknown     | Unknown | 0.58  | 0.05       |        |
| <input checked="" type="checkbox"/> | F2   | RGS1 5      | Unknown     | 2       | 0.78  | 0.33       |        |
| <input checked="" type="checkbox"/> | F3   | RGS1 5      | Unknown     | Unknown | 0.66  | 0.09       |        |
| <input checked="" type="checkbox"/> | F4   | RGS1 6      | Unknown     | 2       | 0.94  | 0.72       |        |
| <input checked="" type="checkbox"/> | F5   | RGS1 6      | Unknown     | 2       | 0.99  | 0.78       |        |
| <input checked="" type="checkbox"/> | F6   | RGS1 6      | Unknown     | 2       | 0.98  | 0.81       |        |
| <input checked="" type="checkbox"/> | F7   | RGS1 7      | Unknown     | 2       | 0.98  | 0.83       |        |
| <input checked="" type="checkbox"/> | F8   | RGS1 7      | Unknown     | 2       | 0.97  | 0.75       |        |
| <input checked="" type="checkbox"/> | F9   | RGS1 7      | Unknown     | 2       | 0.99  | 0.76       |        |

## Results

| Inc                                 | Pos. | Sample Name | Sample Type | Group    | Score | Resolution | Status |
|-------------------------------------|------|-------------|-------------|----------|-------|------------|--------|
| <input checked="" type="checkbox"/> | F10  | RGS1 8      | Unknown     | 2        | 0.95  | 0.62       |        |
| <input checked="" type="checkbox"/> | F11  | RGS1 8      | Unknown     | 2        | 0.99  | 0.76       |        |
| <input checked="" type="checkbox"/> | F12  | RGS1 8      | Unknown     | 2        | 0.99  | 0.73       |        |
| <input checked="" type="checkbox"/> | G1   | blank       | Unknown     | Negative | 1.00  | 1.00       |        |
| <input checked="" type="checkbox"/> | G2   | blank       | Unknown     | Negative | 1.00  | 1.00       |        |
| <input checked="" type="checkbox"/> | G3   | blank       | Unknown     | Negative | 1.00  | 1.00       |        |
| <input checked="" type="checkbox"/> | G4   | blank       | Unknown     | Negative | 1.00  | 1.00       |        |
| <input checked="" type="checkbox"/> | G5   | blank       | Unknown     | Negative | 1.00  | 1.00       |        |
| <input checked="" type="checkbox"/> | G6   | blank       | Unknown     | Negative | 1.00  | 1.00       |        |
| <input checked="" type="checkbox"/> | G7   | blank       | Unknown     | Negative | 1.00  | 1.00       |        |
| <input checked="" type="checkbox"/> | G8   | blank       | Unknown     | Negative | 1.00  | 1.00       |        |
| <input checked="" type="checkbox"/> | G9   | blank       | Unknown     | Negative | 1.00  | 1.00       |        |
| <input checked="" type="checkbox"/> | G10  | blank       | Unknown     | Negative | 1.00  | 1.00       |        |
| <input checked="" type="checkbox"/> | G11  | blank       | Unknown     | Negative | 1.00  | 1.00       |        |
| <input checked="" type="checkbox"/> | G12  | blank       | Unknown     | Negative | 1.00  | 1.00       |        |
| <input checked="" type="checkbox"/> | H1   | blank       | Unknown     | Negative | 1.00  | 1.00       |        |
| <input checked="" type="checkbox"/> | H2   | blank       | Unknown     | Negative | 1.00  | 1.00       |        |
| <input checked="" type="checkbox"/> | H3   | blank       | Unknown     | Negative | 1.00  | 1.00       |        |
| <input checked="" type="checkbox"/> | H4   | blank       | Unknown     | Negative | 1.00  | 1.00       |        |
| <input checked="" type="checkbox"/> | H5   | blank       | Unknown     | Negative | 1.00  | 1.00       |        |
| <input checked="" type="checkbox"/> | H6   | blank       | Unknown     | Negative | 1.00  | 1.00       |        |
| <input checked="" type="checkbox"/> | H7   | blank       | Unknown     | Negative | 1.00  | 1.00       |        |
| <input checked="" type="checkbox"/> | H8   | blank       | Unknown     | Negative | 1.00  | 1.00       |        |
| <input checked="" type="checkbox"/> | H9   | blank       | Unknown     | Negative | 1.00  | 1.00       |        |
| <input checked="" type="checkbox"/> | H10  | blank       | Unknown     | Negative | 1.00  | 1.00       |        |
| <input checked="" type="checkbox"/> | H11  | blank       | Unknown     | Negative | 1.00  | 1.00       |        |
| <input checked="" type="checkbox"/> | H12  | blank       | Unknown     | Negative | 1.00  | 1.00       |        |

## Group 1

| Inc                                 | Pos | Sample Name | Sample Type | Score | Resolution | Status |
|-------------------------------------|-----|-------------|-------------|-------|------------|--------|
| <input checked="" type="checkbox"/> | A1  | GAPDH 1     | Unknown     | 0.98  | 0.39       |        |
| <input checked="" type="checkbox"/> | A2  | GAPDH 1     | Unknown     | 0.95  | 0.62       |        |
| <input checked="" type="checkbox"/> | A3  | GAPDH 1     | Unknown     | 0.98  | 0.41       |        |
| <input checked="" type="checkbox"/> | A4  | GAPDH 2     | Unknown     | 0.98  | 0.50       |        |
| <input checked="" type="checkbox"/> | A6  | GAPDH 2     | Unknown     | 0.93  | 0.66       |        |
| <input checked="" type="checkbox"/> | A7  | GAPDH 3     | Unknown     | 0.98  | 0.53       |        |
| <input checked="" type="checkbox"/> | A8  | GAPDH 3     | Unknown     | 0.91  | 0.22       |        |
| <input checked="" type="checkbox"/> | A9  | GAPDH 3     | Unknown     | 0.96  | 0.28       |        |

**Group 1**

| Inc                                 | Pos | Sample Name | Sample Type | Score | Resolution | Status |
|-------------------------------------|-----|-------------|-------------|-------|------------|--------|
| <input checked="" type="checkbox"/> | A10 | GAPDH 4     | Unknown     | 0.93  | 0.63       |        |
| <input checked="" type="checkbox"/> | A11 | GAPDH 4     | Unknown     | 0.94  | 0.58       |        |
| <input checked="" type="checkbox"/> | A12 | GAPDH 4     | Unknown     | 0.96  | 0.57       |        |
| <input checked="" type="checkbox"/> | B1  | FCER1A 1    | Unknown     | 0.98  | 0.82       |        |
| <input checked="" type="checkbox"/> | B3  | FCER1A 1    | Unknown     | 0.96  | 0.82       |        |
| <input checked="" type="checkbox"/> | B4  | FCER1A 2    | Unknown     | 0.96  | 0.77       |        |
| <input checked="" type="checkbox"/> | B6  | FCER1A 2    | Unknown     | 0.83  | 0.36       |        |
| <input checked="" type="checkbox"/> | B8  | FCER1A 3    | Unknown     | 0.79  | 0.38       |        |
| <input checked="" type="checkbox"/> | B12 | FCER1A 4    | Unknown     | 0.95  | 0.75       |        |
| <input checked="" type="checkbox"/> | D1  | GAPDH 4     | Unknown     | 0.95  | 0.67       |        |
| <input checked="" type="checkbox"/> | D2  | GAPDH 4     | Unknown     | 1.00  | 0.51       |        |
| <input checked="" type="checkbox"/> | D3  | GAPDH 4     | Unknown     | 0.96  | 0.61       |        |
| <input checked="" type="checkbox"/> | D4  | GAPDH 5     | Unknown     | 0.94  | 0.63       |        |
| <input checked="" type="checkbox"/> | D5  | GAPDH 5     | Unknown     | 0.94  | 0.65       |        |
| <input checked="" type="checkbox"/> | D6  | GAPDH 5     | Unknown     | 0.93  | 0.72       |        |
| <input checked="" type="checkbox"/> | D7  | GAPDH 6     | Unknown     | 0.93  | 0.69       |        |
| <input checked="" type="checkbox"/> | D8  | GAPDH 6     | Unknown     | 0.94  | 0.69       |        |
| <input checked="" type="checkbox"/> | D9  | GAPDH 6     | Unknown     | 0.98  | 0.52       |        |
| <input checked="" type="checkbox"/> | D10 | GAPDH 8     | Unknown     | 0.81  | 0.18       |        |
| <input checked="" type="checkbox"/> | D12 | GAPDH 8     | Unknown     | 0.97  | 0.56       |        |
| <input checked="" type="checkbox"/> | E1  | FCER1A 5    | Unknown     | 0.91  | 0.70       |        |
| <input checked="" type="checkbox"/> | E2  | FCER1A 5    | Unknown     | 0.98  | 0.84       |        |
| <input checked="" type="checkbox"/> | E3  | FCER1A 5    | Unknown     | 0.94  | 0.76       |        |
| <input checked="" type="checkbox"/> | E4  | FCER1A 6    | Unknown     | 0.73  | 0.30       |        |
| <input checked="" type="checkbox"/> | E5  | FCER1A 6    | Unknown     | 0.95  | 0.86       |        |
| <input checked="" type="checkbox"/> | E6  | FCER1A 6    | Unknown     | 0.73  | 0.15       |        |
| <input checked="" type="checkbox"/> | E7  | FCER1A 7    | Unknown     | 0.70  | 0.15       |        |
| <input checked="" type="checkbox"/> | E8  | FCER1A 7    | Unknown     | 0.75  | 0.19       |        |
| <input checked="" type="checkbox"/> | E9  | FCER1A 7    | Unknown     | 0.80  | 0.53       |        |
| <input checked="" type="checkbox"/> | E10 | FCER1A 8    | Unknown     | 0.88  | 0.61       |        |
| <input checked="" type="checkbox"/> | E11 | FCER1A 8    | Unknown     | 0.97  | 0.81       |        |
| <input checked="" type="checkbox"/> | E12 | FCER1A 8    | Unknown     | 0.90  | 0.65       |        |

**Group 2**

| Inc                                 | Pos | Sample Name | Sample Type | Score | Resolution | Status |
|-------------------------------------|-----|-------------|-------------|-------|------------|--------|
| <input checked="" type="checkbox"/> | C1  | RGS1 1      | Unknown     | 0.99  | 0.72       |        |
| <input checked="" type="checkbox"/> | C2  | RGS1 1      | Unknown     | 1.00  | 0.77       |        |
| <input checked="" type="checkbox"/> | C3  | RGS1 1      | Unknown     | 0.89  | 0.42       |        |

**Group 2**

| Inc                                 | Pos | Sample Name | Sample Type | Score | Resolution | Status |
|-------------------------------------|-----|-------------|-------------|-------|------------|--------|
| <input checked="" type="checkbox"/> | C4  | RGS1 2      | Unknown     | 0.99  | 0.75       |        |
| <input checked="" type="checkbox"/> | C5  | RGS1 2      | Unknown     | 0.99  | 0.74       |        |
| <input checked="" type="checkbox"/> | C6  | RGS1 2      | Unknown     | 0.98  | 0.78       |        |
| <input checked="" type="checkbox"/> | C7  | RGS1 3      | Unknown     | 0.97  | 0.84       |        |
| <input checked="" type="checkbox"/> | C8  | RGS1 3      | Unknown     | 0.99  | 0.77       |        |
| <input checked="" type="checkbox"/> | C9  | RGS1 3      | Unknown     | 0.88  | 0.49       |        |
| <input checked="" type="checkbox"/> | C10 | RGS1 4      | Unknown     | 0.97  | 0.82       |        |
| <input checked="" type="checkbox"/> | C11 | RGS1 4      | Unknown     | 0.97  | 0.80       |        |
| <input checked="" type="checkbox"/> | C12 | RGS1 4      | Unknown     | 0.98  | 0.80       |        |
| <input checked="" type="checkbox"/> | F2  | RGS1 5      | Unknown     | 0.78  | 0.33       |        |
| <input checked="" type="checkbox"/> | F4  | RGS1 6      | Unknown     | 0.94  | 0.72       |        |
| <input checked="" type="checkbox"/> | F5  | RGS1 6      | Unknown     | 0.99  | 0.78       |        |
| <input checked="" type="checkbox"/> | F6  | RGS1 6      | Unknown     | 0.98  | 0.81       |        |
| <input checked="" type="checkbox"/> | F7  | RGS1 7      | Unknown     | 0.98  | 0.83       |        |
| <input checked="" type="checkbox"/> | F8  | RGS1 7      | Unknown     | 0.97  | 0.75       |        |
| <input checked="" type="checkbox"/> | F9  | RGS1 7      | Unknown     | 0.99  | 0.76       |        |
| <input checked="" type="checkbox"/> | F10 | RGS1 8      | Unknown     | 0.95  | 0.62       |        |
| <input checked="" type="checkbox"/> | F11 | RGS1 8      | Unknown     | 0.99  | 0.76       |        |
| <input checked="" type="checkbox"/> | F12 | RGS1 8      | Unknown     | 0.99  | 0.73       |        |

**Group 3**

| Inc                                 | Pos | Sample Name | Sample Type | Score | Resolution | Status |
|-------------------------------------|-----|-------------|-------------|-------|------------|--------|
| <input checked="" type="checkbox"/> | A5  | GAPDH 2     | Unknown     | 1.00  | 0.51       |        |
| <input checked="" type="checkbox"/> | D11 | GAPDH 8     | Unknown     | 0.98  | 0.34       |        |

**Group Negative**

| Inc                                 | Pos | Sample Name | Sample Type | Score | Resolution | Status |
|-------------------------------------|-----|-------------|-------------|-------|------------|--------|
| <input checked="" type="checkbox"/> | G1  | blank       | Unknown     | 1.00  | 1.00       |        |
| <input checked="" type="checkbox"/> | G2  | blank       | Unknown     | 1.00  | 1.00       |        |
| <input checked="" type="checkbox"/> | G3  | blank       | Unknown     | 1.00  | 1.00       |        |
| <input checked="" type="checkbox"/> | G4  | blank       | Unknown     | 1.00  | 1.00       |        |
| <input checked="" type="checkbox"/> | G5  | blank       | Unknown     | 1.00  | 1.00       |        |
| <input checked="" type="checkbox"/> | G6  | blank       | Unknown     | 1.00  | 1.00       |        |
| <input checked="" type="checkbox"/> | G7  | blank       | Unknown     | 1.00  | 1.00       |        |
| <input checked="" type="checkbox"/> | G8  | blank       | Unknown     | 1.00  | 1.00       |        |
| <input checked="" type="checkbox"/> | G9  | blank       | Unknown     | 1.00  | 1.00       |        |
| <input checked="" type="checkbox"/> | G10 | blank       | Unknown     | 1.00  | 1.00       |        |
| <input checked="" type="checkbox"/> | G11 | blank       | Unknown     | 1.00  | 1.00       |        |

| Group                               |     | Negative    |             |       |            |        |
|-------------------------------------|-----|-------------|-------------|-------|------------|--------|
| Inc                                 | Pos | Sample Name | Sample Type | Score | Resolution | Status |
| <input checked="" type="checkbox"/> | G12 | blank       | Unknown     | 1.00  | 1.00       |        |
| <input checked="" type="checkbox"/> | H1  | blank       | Unknown     | 1.00  | 1.00       |        |
| <input checked="" type="checkbox"/> | H2  | blank       | Unknown     | 1.00  | 1.00       |        |
| <input checked="" type="checkbox"/> | H3  | blank       | Unknown     | 1.00  | 1.00       |        |
| <input checked="" type="checkbox"/> | H4  | blank       | Unknown     | 1.00  | 1.00       |        |
| <input checked="" type="checkbox"/> | H5  | blank       | Unknown     | 1.00  | 1.00       |        |
| <input checked="" type="checkbox"/> | H6  | blank       | Unknown     | 1.00  | 1.00       |        |
| <input checked="" type="checkbox"/> | H7  | blank       | Unknown     | 1.00  | 1.00       |        |
| <input checked="" type="checkbox"/> | H8  | blank       | Unknown     | 1.00  | 1.00       |        |
| <input checked="" type="checkbox"/> | H9  | blank       | Unknown     | 1.00  | 1.00       |        |
| <input checked="" type="checkbox"/> | H10 | blank       | Unknown     | 1.00  | 1.00       |        |
| <input checked="" type="checkbox"/> | H11 | blank       | Unknown     | 1.00  | 1.00       |        |
| <input checked="" type="checkbox"/> | H12 | blank       | Unknown     | 1.00  | 1.00       |        |

| Group                               |     | Unknown     |             |       |            |        |
|-------------------------------------|-----|-------------|-------------|-------|------------|--------|
| Inc                                 | Pos | Sample Name | Sample Type | Score | Resolution | Status |
| <input checked="" type="checkbox"/> | B2  | FCER1A 1    | Unknown     | 0.63  | 0.07       |        |
| <input checked="" type="checkbox"/> | B5  | FCER1A 2    | Unknown     | 0.67  | 0.05       |        |
| <input checked="" type="checkbox"/> | B7  | FCER1A 3    | Unknown     | 0.67  | 0.05       |        |
| <input checked="" type="checkbox"/> | B9  | FCER1A 3    | Unknown     | 0.65  | 0.09       |        |
| <input checked="" type="checkbox"/> | B10 | FCER1A 4    | Unknown     | 0.62  |            |        |
| <input checked="" type="checkbox"/> | B11 | FCER1A 4    | Unknown     | 0.73  | 0.08       |        |
| <input checked="" type="checkbox"/> | F1  | RGS1 5      | Unknown     | 0.58  | 0.05       |        |
| <input checked="" type="checkbox"/> | F3  | RGS1 5      | Unknown     | 0.66  | 0.09       |        |

### Melting Curves

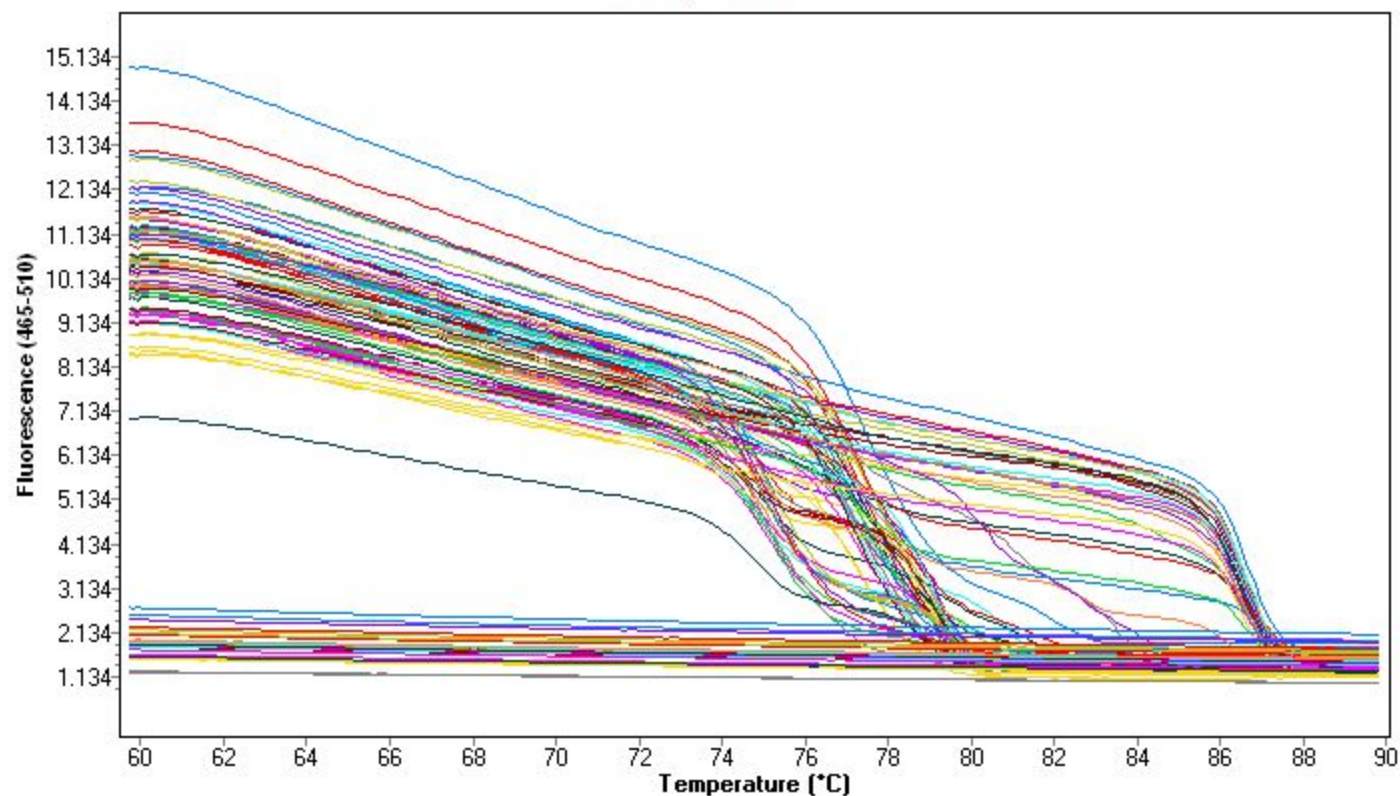

### Melting Peaks

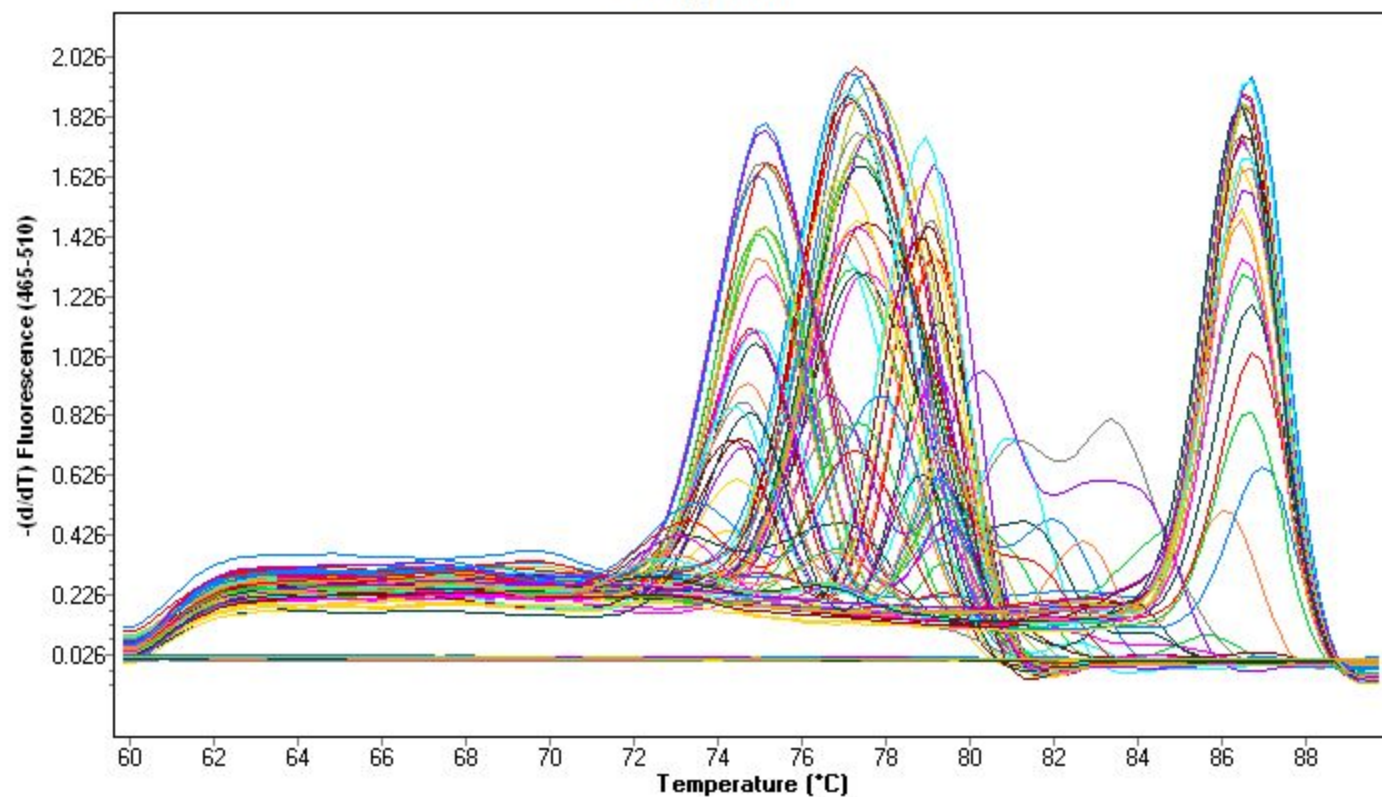

### Analysis Notes



## Tm Calling for All Samples (Tm Calling)

### Settings

|                |             |                    |          |
|----------------|-------------|--------------------|----------|
| Channel        | 465-510     | Color Compensation | Off      |
| Program        | Program     |                    |          |
| Show Shoulders | False       | Chemistry          | HybProbe |
|                |             | Max Peaks          | 2        |
| Subset Name    | All Samples |                    |          |

### Results

| Inc                                 | Pos | Sample Name | Peak 1 |      |       |        | Peak 2 |      |       |        | Status |
|-------------------------------------|-----|-------------|--------|------|-------|--------|--------|------|-------|--------|--------|
|                                     |     |             | Tm     | Area | Width | Height | Tm     | Area | Width | Height |        |
| <input checked="" type="checkbox"/> | A1  | GAPDH 1     | 77.73  | 6.39 | 3.19  | 2.00   | 82.00  | 1.42 | 2.85  | 0.50   |        |
| <input checked="" type="checkbox"/> | A2  | GAPDH 1     | 77.66  | 6.91 | 3.37  | 2.05   |        |      |       |        |        |
| <input checked="" type="checkbox"/> | A3  | GAPDH 1     | 77.31  | 3.77 | 2.83  | 1.33   |        |      |       |        |        |
| <input checked="" type="checkbox"/> | A4  | GAPDH 2     | 77.83  | 4.09 | 3.30  | 1.24   |        |      |       |        |        |
| <input checked="" type="checkbox"/> | A5  | GAPDH 2     | 76.92  | 1.27 | 1.81  | 0.70   | 82.86  | 5.02 | 5.79  | 0.87   |        |
| <input checked="" type="checkbox"/> | A6  | GAPDH 2     | 77.48  | 4.78 | 3.15  | 1.51   |        |      |       |        |        |
| <input checked="" type="checkbox"/> | A7  | GAPDH 3     | 77.97  | 5.32 | 3.58  | 1.49   |        |      |       |        |        |
| <input checked="" type="checkbox"/> | A8  | GAPDH 3     | 76.99  | 4.02 | 2.86  | 1.40   | 80.99  | 2.05 | 2.41  | 0.85   |        |
| <input checked="" type="checkbox"/> | A9  | GAPDH 3     | 77.55  | 3.73 | 2.93  | 1.27   | 81.10  | 1.32 | 3.14  | 0.42   |        |
| <input checked="" type="checkbox"/> | A10 | GAPDH 4     | 77.66  | 5.60 | 3.23  | 1.74   |        |      |       |        |        |
| <input checked="" type="checkbox"/> | A11 | GAPDH 4     | 77.97  | 6.07 | 3.29  | 1.84   |        |      |       |        |        |
| <input checked="" type="checkbox"/> | A12 | GAPDH 4     | 77.97  | 6.90 | 3.49  | 1.98   |        |      |       |        |        |
| <input checked="" type="checkbox"/> | B1  | FCER1A 1    | 75.22  | 6.43 | 3.84  | 1.67   |        |      |       |        |        |
| <input checked="" type="checkbox"/> | B2  | FCER1A 1    | 74.78  | 2.15 | 2.18  | 0.99   | 79.19  | 3.19 | 2.24  | 1.42   |        |
| <input checked="" type="checkbox"/> | B3  | FCER1A 1    | 75.22  | 4.96 | 3.59  | 1.38   |        |      |       |        |        |
| <input checked="" type="checkbox"/> | B4  | FCER1A 2    | 75.29  | 3.82 | 2.91  | 1.31   | 79.44  | 1.11 | 2.52  | 0.44   |        |
| <input checked="" type="checkbox"/> | B5  | FCER1A 2    | 74.58  | 1.66 | 2.27  | 0.73   | 79.07  | 3.73 | 2.42  | 1.54   |        |
| <input checked="" type="checkbox"/> | B6  | FCER1A 2    | 74.12  | 0.56 | 1.89  | 0.30   | 78.89  | 4.03 | 2.41  | 1.67   |        |
| <input checked="" type="checkbox"/> | B7  | FCER1A 3    | 74.49  | 1.23 | 2.00  | 0.62   | 79.05  | 3.56 | 2.34  | 1.52   |        |
| <input checked="" type="checkbox"/> | B8  | FCER1A 3    | 74.98  | 2.91 | 2.58  | 1.13   | 79.30  | 2.04 | 2.41  | 0.85   |        |
| <input checked="" type="checkbox"/> | B9  | FCER1A 3    | 74.92  | 2.14 | 2.22  | 0.96   | 79.35  | 2.69 | 2.28  | 1.18   |        |
| <input checked="" type="checkbox"/> | B10 | FCER1A 4    | 74.69  | 1.69 | 2.06  | 0.82   | 79.19  | 3.29 | 2.31  | 1.43   |        |
| <input checked="" type="checkbox"/> | B11 | FCER1A 4    | 74.59  | 1.05 | 1.85  | 0.56   | 79.20  | 4.05 | 2.34  | 1.73   |        |
| <input checked="" type="checkbox"/> | B12 | FCER1A 4    | 75.33  | 4.79 | 2.83  | 1.69   | 79.62  | 1.52 | 2.24  | 0.68   |        |
| <input checked="" type="checkbox"/> | C1  | RGS1 1      |        |      |       |        |        |      |       |        |        |
| <input checked="" type="checkbox"/> | C2  | RGS1 1      | 86.60  | 4.63 | 2.31  | 2.01   |        |      |       |        |        |
| <input checked="" type="checkbox"/> | C3  | RGS1 1      | 76.71  | 0.23 | 1.04  | 0.22   | 86.64  | 3.90 | 2.79  | 1.40   |        |
| <input checked="" type="checkbox"/> | C4  | RGS1 2      | 86.55  | 4.37 | 2.39  | 1.83   |        |      |       |        |        |
| <input checked="" type="checkbox"/> | C5  | RGS1 2      | 86.51  | 4.73 | 2.41  | 1.96   |        |      |       |        |        |

## Results

| Inc                                 | Pos | Sample Name | Peak 1 |      |       |        | Peak 2 |      |       |        | Status |
|-------------------------------------|-----|-------------|--------|------|-------|--------|--------|------|-------|--------|--------|
|                                     |     |             | Tm     | Area | Width | Height | Tm     | Area | Width | Height |        |
| <input checked="" type="checkbox"/> | C6  | RGS1 2      | 86.51  | 4.40 | 2.55  | 1.73   |        |      |       |        |        |
| <input checked="" type="checkbox"/> | C7  | RGS1 3      | 86.56  | 4.78 | 2.41  | 1.98   |        |      |       |        |        |
| <input checked="" type="checkbox"/> | C8  | RGS1 3      | 86.70  | 4.88 | 2.32  | 2.10   |        |      |       |        |        |
| <input checked="" type="checkbox"/> | C9  | RGS1 3      | 75.35  | 1.44 | 4.99  | 0.29   |        |      |       |        |        |
| <input checked="" type="checkbox"/> | C10 | RGS1 4      | 86.67  | 4.16 | 2.38  | 1.75   |        |      |       |        |        |
| <input checked="" type="checkbox"/> | C11 | RGS1 4      | 86.65  | 4.47 | 2.62  | 1.71   |        |      |       |        |        |
| <input checked="" type="checkbox"/> | C12 | RGS1 4      | 86.66  | 4.59 | 2.33  | 1.97   |        |      |       |        |        |
| <input checked="" type="checkbox"/> | D1  | GAPDH 4     | 77.36  | 6.83 | 3.38  | 2.02   |        |      |       |        |        |
| <input checked="" type="checkbox"/> | D2  | GAPDH 4     | 77.57  | 6.49 | 3.69  | 1.76   |        |      |       |        |        |
| <input checked="" type="checkbox"/> | D3  | GAPDH 4     | 77.73  | 5.99 | 3.48  | 1.72   |        |      |       |        |        |
| <input checked="" type="checkbox"/> | D4  | GAPDH 5     | 77.59  | 4.85 | 3.26  | 1.49   |        |      |       |        |        |
| <input checked="" type="checkbox"/> | D5  | GAPDH 5     | 77.59  | 6.10 | 3.35  | 1.82   |        |      |       |        |        |
| <input checked="" type="checkbox"/> | D6  | GAPDH 5     | 77.13  | 5.48 | 3.25  | 1.68   |        |      |       |        |        |
| <input checked="" type="checkbox"/> | D7  | GAPDH 6     | 77.30  | 5.98 | 3.09  | 1.94   |        |      |       |        |        |
| <input checked="" type="checkbox"/> | D8  | GAPDH 6     | 77.28  | 6.25 | 3.21  | 1.95   |        |      |       |        |        |
| <input checked="" type="checkbox"/> | D9  | GAPDH 6     | 77.68  | 5.56 | 3.38  | 1.65   |        |      |       |        |        |
| <input checked="" type="checkbox"/> | D10 | GAPDH 8     | 77.27  | 2.63 | 1.70  | 1.55   | 86.62  | 4.88 | 10.47 | 0.47   |        |
| <input checked="" type="checkbox"/> | D11 | GAPDH 8     | 76.49  | 1.04 | 1.08  | 0.96   | 81.92  | 7.05 | 7.36  | 0.96   |        |
| <input checked="" type="checkbox"/> | D12 | GAPDH 8     | 78.03  | 6.61 | 3.67  | 1.80   |        |      |       |        |        |
| <input checked="" type="checkbox"/> | E1  | FCER1A 5    | 75.04  | 4.30 | 2.58  | 1.67   | 79.34  | 1.51 | 2.22  | 0.68   |        |
| <input checked="" type="checkbox"/> | E2  | FCER1A 5    | 75.35  | 5.91 | 3.67  | 1.61   |        |      |       |        |        |
| <input checked="" type="checkbox"/> | E3  | FCER1A 5    | 75.08  | 3.99 | 2.72  | 1.47   | 79.37  | 1.33 | 2.21  | 0.60   |        |
| <input checked="" type="checkbox"/> | E4  | FCER1A 6    | 74.89  | 2.75 | 2.42  | 1.13   | 79.27  | 2.53 | 2.29  | 1.10   |        |
| <input checked="" type="checkbox"/> | E5  | FCER1A 6    | 75.37  | 5.91 | 3.55  | 1.67   |        |      |       |        |        |
| <input checked="" type="checkbox"/> | E6  | FCER1A 6    | 74.39  | 0.93 | 1.91  | 0.49   | 78.97  | 3.39 | 2.32  | 1.46   |        |
| <input checked="" type="checkbox"/> | E7  | FCER1A 7    | 74.29  | 1.30 | 2.07  | 0.63   | 78.80  | 3.41 | 2.31  | 1.47   |        |
| <input checked="" type="checkbox"/> | E8  | FCER1A 7    | 74.36  | 1.46 | 1.99  | 0.73   | 78.90  | 4.29 | 2.36  | 1.82   |        |
| <input checked="" type="checkbox"/> | E9  | FCER1A 7    | 74.77  | 1.98 | 2.31  | 0.86   | 78.86  | 1.58 | 2.19  | 0.72   |        |
| <input checked="" type="checkbox"/> | E10 | FCER1A 8    | 75.11  | 3.53 | 2.56  | 1.38   | 79.44  | 1.78 | 2.25  | 0.79   |        |
| <input checked="" type="checkbox"/> | E11 | FCER1A 8    | 75.28  | 5.35 | 2.95  | 1.81   | 79.53  | 1.14 | 2.21  | 0.52   |        |
| <input checked="" type="checkbox"/> | E12 | FCER1A 8    | 75.22  | 4.00 | 2.68  | 1.49   | 79.56  | 1.78 | 2.29  | 0.78   |        |
| <input checked="" type="checkbox"/> | F1  | RGS1 5      | 73.53  | 0.68 | 2.60  | 0.26   | 77.76  | 1.49 | 2.16  | 0.69   |        |
| <input checked="" type="checkbox"/> | F2  | RGS1 5      | 76.53  | 1.43 | 3.85  | 0.37   |        |      |       |        |        |
| <input checked="" type="checkbox"/> | F3  | RGS1 5      | 77.39  | 1.10 | 1.53  | 0.72   |        |      |       |        |        |
| <input checked="" type="checkbox"/> | F4  | RGS1 6      | 86.61  | 3.73 | 2.60  | 1.44   |        |      |       |        |        |
| <input checked="" type="checkbox"/> | F5  | RGS1 6      | 86.51  | 4.22 | 2.28  | 1.85   |        |      |       |        |        |

## Results

| Inc                                 | Pos | Sample Name | Peak 1 |      |       |        | Peak 2 |      |       |        | Status |
|-------------------------------------|-----|-------------|--------|------|-------|--------|--------|------|-------|--------|--------|
|                                     |     |             | Tm     | Area | Width | Height | Tm     | Area | Width | Height |        |
| <input checked="" type="checkbox"/> | F6  | RGS1 6      | 86.50  | 4.02 | 2.49  | 1.62   |        |      |       |        |        |
| <input checked="" type="checkbox"/> | F7  | RGS1 7      | 86.61  | 4.96 | 2.62  | 1.89   |        |      |       |        |        |
| <input checked="" type="checkbox"/> | F8  | RGS1 7      | 86.62  | 4.48 | 2.49  | 1.80   |        |      |       |        |        |
| <input checked="" type="checkbox"/> | F9  | RGS1 7      | 86.49  | 4.91 | 2.47  | 1.98   |        |      |       |        |        |
| <input checked="" type="checkbox"/> | F10 | RGS1 8      | 86.56  | 4.27 | 2.66  | 1.61   |        |      |       |        |        |
| <input checked="" type="checkbox"/> | F11 | RGS1 8      | 86.62  | 4.95 | 2.48  | 1.99   |        |      |       |        |        |
| <input checked="" type="checkbox"/> | F12 | RGS1 8      | 86.63  | 4.79 | 2.43  | 1.97   |        |      |       |        |        |
| <input checked="" type="checkbox"/> | G1  | blank       |        |      |       |        |        |      |       |        |        |
| <input checked="" type="checkbox"/> | G2  | blank       |        |      |       |        |        |      |       |        |        |
| <input checked="" type="checkbox"/> | G3  | blank       |        |      |       |        |        |      |       |        |        |
| <input checked="" type="checkbox"/> | G4  | blank       |        |      |       |        |        |      |       |        |        |
| <input checked="" type="checkbox"/> | G5  | blank       |        |      |       |        |        |      |       |        |        |
| <input checked="" type="checkbox"/> | G6  | blank       |        |      |       |        |        |      |       |        |        |
| <input checked="" type="checkbox"/> | G7  | blank       |        |      |       |        |        |      |       |        |        |
| <input checked="" type="checkbox"/> | G8  | blank       |        |      |       |        |        |      |       |        |        |
| <input checked="" type="checkbox"/> | G9  | blank       |        |      |       |        |        |      |       |        |        |
| <input checked="" type="checkbox"/> | G10 | blank       |        |      |       |        |        |      |       |        |        |
| <input checked="" type="checkbox"/> | G11 | blank       |        |      |       |        |        |      |       |        |        |
| <input checked="" type="checkbox"/> | G12 | blank       |        |      |       |        |        |      |       |        |        |
| <input checked="" type="checkbox"/> | H1  | blank       |        |      |       |        |        |      |       |        |        |
| <input checked="" type="checkbox"/> | H2  | blank       |        |      |       |        |        |      |       |        |        |
| <input checked="" type="checkbox"/> | H3  | blank       |        |      |       |        |        |      |       |        |        |
| <input checked="" type="checkbox"/> | H4  | blank       |        |      |       |        |        |      |       |        |        |
| <input checked="" type="checkbox"/> | H5  | blank       |        |      |       |        |        |      |       |        |        |
| <input checked="" type="checkbox"/> | H6  | blank       |        |      |       |        |        |      |       |        |        |
| <input checked="" type="checkbox"/> | H7  | blank       |        |      |       |        |        |      |       |        |        |
| <input checked="" type="checkbox"/> | H8  | blank       |        |      |       |        |        |      |       |        |        |
| <input checked="" type="checkbox"/> | H9  | blank       |        |      |       |        |        |      |       |        |        |
| <input checked="" type="checkbox"/> | H10 | blank       |        |      |       |        |        |      |       |        |        |
| <input checked="" type="checkbox"/> | H11 | blank       |        |      |       |        |        |      |       |        |        |
| <input checked="" type="checkbox"/> | H12 | blank       |        |      |       |        |        |      |       |        |        |

### Melting Curves

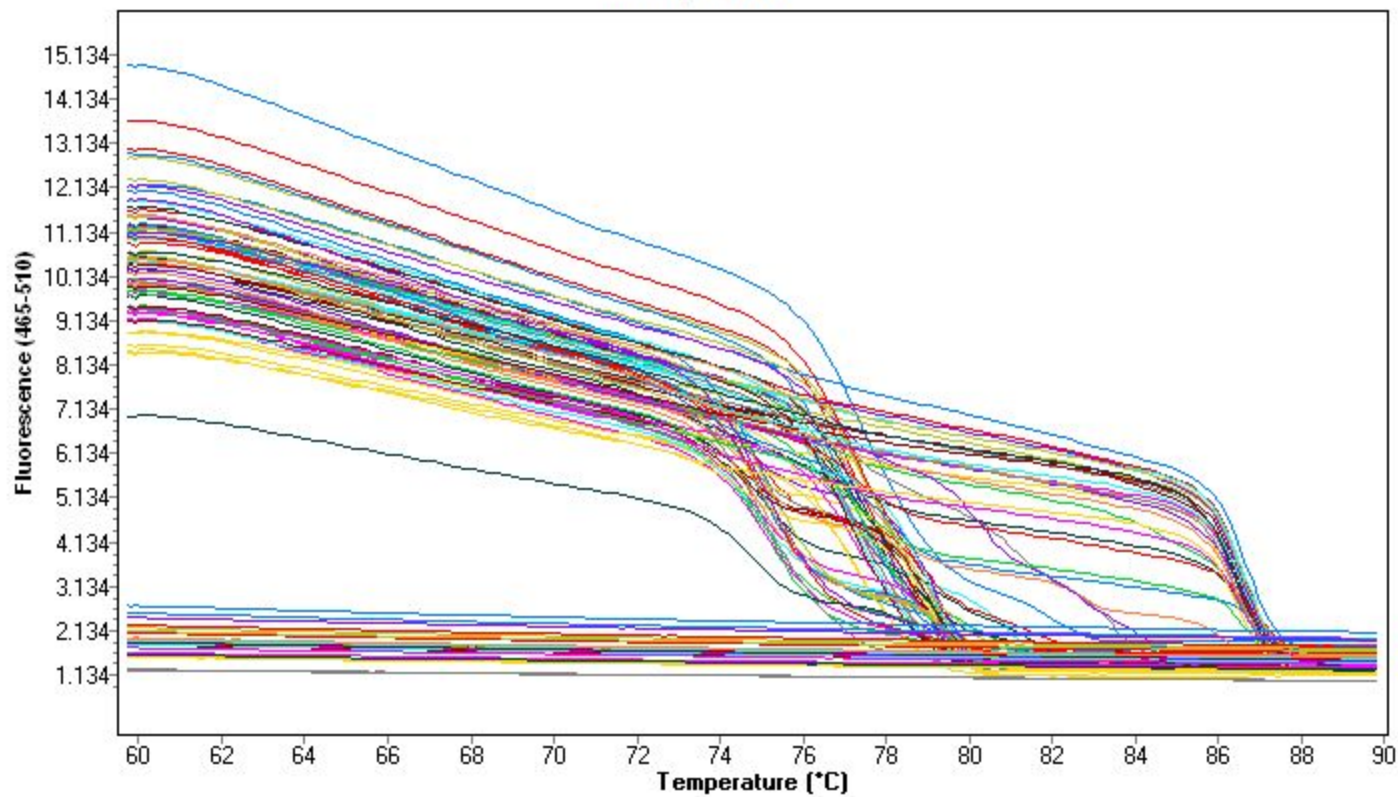

### Melting Peaks

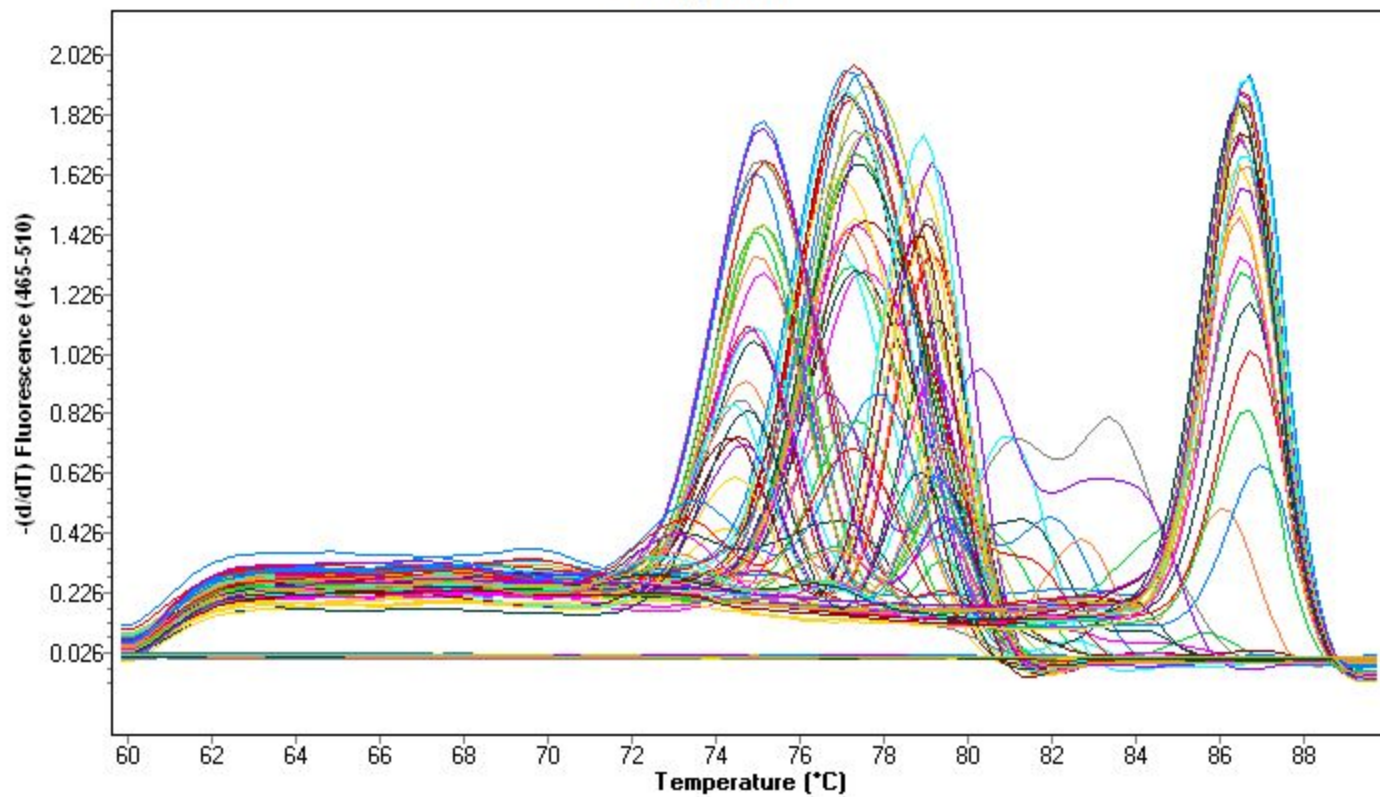

### Analysis Notes

## Abs Quant/2nd Derivative Max for All Samples (2) (Abs Quant/2nd Derivative Max)

### Settings

|                    |                 |       |  |
|--------------------|-----------------|-------|--|
| Channel            | 465-510         |       |  |
| Color Compensation | Off             |       |  |
| Program            | Program         | Units |  |
| Mode               | High Confidence |       |  |

|             |             |
|-------------|-------------|
| Subset Name | All Samples |
|-------------|-------------|

### Results

| Inc                                 | Pos | Name     | Type    | CP    | Concentration | Standard | Status |
|-------------------------------------|-----|----------|---------|-------|---------------|----------|--------|
| <input checked="" type="checkbox"/> | A1  | GAPDH 1  | Unknown | 29.00 |               |          |        |
| <input checked="" type="checkbox"/> | A2  | GAPDH 1  | Unknown | 32.60 |               |          |        |
| <input checked="" type="checkbox"/> | A3  | GAPDH 1  | Unknown | 31.98 |               |          |        |
| <input checked="" type="checkbox"/> | A4  | GAPDH 2  | Unknown | 28.33 |               |          |        |
| <input checked="" type="checkbox"/> | A5  | GAPDH 2  | Unknown | 22.67 |               |          |        |
| <input checked="" type="checkbox"/> | A6  | GAPDH 2  | Unknown | 31.98 |               |          |        |
| <input checked="" type="checkbox"/> | A7  | GAPDH 3  | Unknown | 29.70 |               |          |        |
| <input checked="" type="checkbox"/> | A8  | GAPDH 3  | Unknown | 33.53 |               |          |        |
| <input checked="" type="checkbox"/> | A9  | GAPDH 3  | Unknown | 29.47 |               |          |        |
| <input checked="" type="checkbox"/> | A10 | GAPDH 4  | Unknown | 31.81 |               |          |        |
| <input checked="" type="checkbox"/> | A11 | GAPDH 4  | Unknown | 31.68 |               |          |        |
| <input checked="" type="checkbox"/> | A12 | GAPDH 4  | Unknown | 30.11 |               |          |        |
| <input checked="" type="checkbox"/> | B1  | FCER1A 1 | Unknown | 29.70 |               |          |        |
| <input checked="" type="checkbox"/> | B2  | FCER1A 1 | Unknown | 31.65 |               |          |        |
| <input checked="" type="checkbox"/> | B3  | FCER1A 1 | Unknown | 29.72 |               |          |        |
| <input checked="" type="checkbox"/> | B4  | FCER1A 2 | Unknown | 26.96 |               |          |        |
| <input checked="" type="checkbox"/> | B5  | FCER1A 2 | Unknown | 28.05 |               |          |        |
| <input checked="" type="checkbox"/> | B6  | FCER1A 2 | Unknown | 28.47 |               |          |        |
| <input checked="" type="checkbox"/> | B7  | FCER1A 3 | Unknown | 29.94 |               |          |        |
| <input checked="" type="checkbox"/> | B8  | FCER1A 3 | Unknown | 29.19 |               |          |        |
| <input checked="" type="checkbox"/> | B9  | FCER1A 3 | Unknown | 29.44 |               |          |        |
| <input checked="" type="checkbox"/> | B10 | FCER1A 4 | Unknown | 29.82 |               |          |        |
| <input checked="" type="checkbox"/> | B11 | FCER1A 4 | Unknown | 29.78 |               |          |        |
| <input checked="" type="checkbox"/> | B12 | FCER1A 4 | Unknown | 28.59 |               |          |        |
| <input checked="" type="checkbox"/> | C1  | RGS1 1   | Unknown | 34.30 |               |          |        |
| <input checked="" type="checkbox"/> | C2  | RGS1 1   | Unknown | 35.00 |               |          | >      |
| <input checked="" type="checkbox"/> | C3  | RGS1 1   | Unknown | 33.15 |               |          |        |
| <input checked="" type="checkbox"/> | C4  | RGS1 2   | Unknown | 32.22 |               |          |        |

> - Late Cp call (last five cycles) has higher uncertainty

## Results

| Inc                                 | Pos | Name     | Type    | CP    | Concentration | Standard | Status |
|-------------------------------------|-----|----------|---------|-------|---------------|----------|--------|
| <input checked="" type="checkbox"/> | C5  | RGS1 2   | Unknown | 31.22 |               |          |        |
| <input checked="" type="checkbox"/> | C6  | RGS1 2   | Unknown | 31.82 |               |          |        |
| <input checked="" type="checkbox"/> | C7  | RGS1 3   | Unknown | 34.04 |               |          |        |
| <input checked="" type="checkbox"/> | C8  | RGS1 3   | Unknown | 32.78 |               |          |        |
| <input checked="" type="checkbox"/> | C9  | RGS1 3   | Unknown | 31.24 |               |          |        |
| <input checked="" type="checkbox"/> | C10 | RGS1 4   | Unknown | 35.00 |               |          | >      |
| <input checked="" type="checkbox"/> | C11 | RGS1 4   | Unknown | 35.00 |               |          | >      |
| <input checked="" type="checkbox"/> | C12 | RGS1 4   | Unknown | 35.00 |               |          | >      |
| <input checked="" type="checkbox"/> | D1  | GAPDH 4  | Unknown | 30.94 |               |          |        |
| <input checked="" type="checkbox"/> | D2  | GAPDH 4  | Unknown | 27.83 |               |          |        |
| <input checked="" type="checkbox"/> | D3  | GAPDH 4  | Unknown | 31.28 |               |          |        |
| <input checked="" type="checkbox"/> | D4  | GAPDH 5  | Unknown | 29.66 |               |          |        |
| <input checked="" type="checkbox"/> | D5  | GAPDH 5  | Unknown | 31.45 |               |          |        |
| <input checked="" type="checkbox"/> | D6  | GAPDH 5  | Unknown | 33.32 |               |          |        |
| <input checked="" type="checkbox"/> | D7  | GAPDH 6  | Unknown | 32.09 |               |          |        |
| <input checked="" type="checkbox"/> | D8  | GAPDH 6  | Unknown | 31.18 |               |          |        |
| <input checked="" type="checkbox"/> | D9  | GAPDH 6  | Unknown | 31.62 |               |          |        |
| <input checked="" type="checkbox"/> | D10 | GAPDH 8  | Unknown | 31.21 |               |          |        |
| <input checked="" type="checkbox"/> | D11 | GAPDH 8  | Unknown | 32.42 |               |          |        |
| <input checked="" type="checkbox"/> | D12 | GAPDH 8  | Unknown | 29.89 |               |          |        |
| <input checked="" type="checkbox"/> | E1  | FCER1A 5 | Unknown | 31.07 |               |          |        |
| <input checked="" type="checkbox"/> | E2  | FCER1A 5 | Unknown | 28.89 |               |          |        |
| <input checked="" type="checkbox"/> | E3  | FCER1A 5 | Unknown | 29.85 |               |          |        |
| <input checked="" type="checkbox"/> | E4  | FCER1A 6 | Unknown | 28.83 |               |          |        |
| <input checked="" type="checkbox"/> | E5  | FCER1A 6 | Unknown | 25.93 |               |          |        |
| <input checked="" type="checkbox"/> | E6  | FCER1A 6 | Unknown | 29.63 |               |          |        |
| <input checked="" type="checkbox"/> | E7  | FCER1A 7 | Unknown | 29.62 |               |          |        |
| <input checked="" type="checkbox"/> | E8  | FCER1A 7 | Unknown | 29.69 |               |          |        |
| <input checked="" type="checkbox"/> | E9  | FCER1A 7 | Unknown | 28.91 |               |          |        |
| <input checked="" type="checkbox"/> | E10 | FCER1A 8 | Unknown | 29.31 |               |          |        |
| <input checked="" type="checkbox"/> | E11 | FCER1A 8 | Unknown | 28.79 |               |          |        |
| <input checked="" type="checkbox"/> | E12 | FCER1A 8 | Unknown | 29.56 |               |          |        |
| <input checked="" type="checkbox"/> | F1  | RGS1 5   | Unknown | 33.32 |               |          |        |
| <input checked="" type="checkbox"/> | F2  | RGS1 5   | Unknown | 33.86 |               |          |        |
| <input checked="" type="checkbox"/> | F3  | RGS1 5   | Unknown | 35.00 |               |          | >      |
| <input checked="" type="checkbox"/> | F4  | RGS1 6   | Unknown | 32.99 |               |          |        |
| <input checked="" type="checkbox"/> | F5  | RGS1 6   | Unknown | 33.67 |               |          |        |

> - Late Cp call (last five cycles) has higher uncertainty

## Results

| Inc                                 | Pos | Name   | Type    | CP    | Concentration | Standard | Status |
|-------------------------------------|-----|--------|---------|-------|---------------|----------|--------|
| <input checked="" type="checkbox"/> | F6  | RGS1 6 | Unknown | 33.88 |               |          |        |
| <input checked="" type="checkbox"/> | F7  | RGS1 7 | Unknown | 32.47 |               |          |        |
| <input checked="" type="checkbox"/> | F8  | RGS1 7 | Unknown | 32.62 |               |          |        |
| <input checked="" type="checkbox"/> | F9  | RGS1 7 | Unknown | 31.90 |               |          |        |
| <input checked="" type="checkbox"/> | F10 | RGS1 8 | Unknown | 31.77 |               |          |        |
| <input checked="" type="checkbox"/> | F11 | RGS1 8 | Unknown | 32.39 |               |          |        |
| <input checked="" type="checkbox"/> | F12 | RGS1 8 | Unknown | 31.83 |               |          |        |
| <input checked="" type="checkbox"/> | G1  | blank  | Unknown |       |               |          |        |
| <input checked="" type="checkbox"/> | G2  | blank  | Unknown |       |               |          |        |
| <input checked="" type="checkbox"/> | G3  | blank  | Unknown |       |               |          |        |
| <input checked="" type="checkbox"/> | G4  | blank  | Unknown |       |               |          |        |
| <input checked="" type="checkbox"/> | G5  | blank  | Unknown |       |               |          |        |
| <input checked="" type="checkbox"/> | G6  | blank  | Unknown |       |               |          |        |
| <input checked="" type="checkbox"/> | G7  | blank  | Unknown |       |               |          |        |
| <input checked="" type="checkbox"/> | G8  | blank  | Unknown |       |               |          |        |
| <input checked="" type="checkbox"/> | G9  | blank  | Unknown |       |               |          |        |
| <input checked="" type="checkbox"/> | G10 | blank  | Unknown |       |               |          |        |
| <input checked="" type="checkbox"/> | G11 | blank  | Unknown |       |               |          |        |
| <input checked="" type="checkbox"/> | G12 | blank  | Unknown |       |               |          |        |
| <input checked="" type="checkbox"/> | H1  | blank  | Unknown |       |               |          |        |
| <input checked="" type="checkbox"/> | H2  | blank  | Unknown |       |               |          |        |
| <input checked="" type="checkbox"/> | H3  | blank  | Unknown |       |               |          |        |
| <input checked="" type="checkbox"/> | H4  | blank  | Unknown |       |               |          |        |
| <input checked="" type="checkbox"/> | H5  | blank  | Unknown |       |               |          |        |
| <input checked="" type="checkbox"/> | H6  | blank  | Unknown |       |               |          |        |
| <input checked="" type="checkbox"/> | H7  | blank  | Unknown |       |               |          |        |
| <input checked="" type="checkbox"/> | H8  | blank  | Unknown |       |               |          |        |
| <input checked="" type="checkbox"/> | H9  | blank  | Unknown |       |               |          |        |
| <input checked="" type="checkbox"/> | H10 | blank  | Unknown |       |               |          |        |
| <input checked="" type="checkbox"/> | H11 | blank  | Unknown |       |               |          |        |
| <input checked="" type="checkbox"/> | H12 | blank  | Unknown |       |               |          |        |

> - Late Cp call (last five cycles) has higher uncertainty

### Amplification Curves



### Standard Curve



### Analysis Notes

Abs Quant/Fit Points for All Samples (1) (Abs Quant/Fit Points)



## Settings

|                    |                       |                  |        |                    |         |  |
|--------------------|-----------------------|------------------|--------|--------------------|---------|--|
| Channel            | 465-510               |                  |        |                    |         |  |
| Color Compensation | Off                   |                  |        |                    |         |  |
| Standard Curve     | Set Efficiency (2.00) |                  |        |                    |         |  |
| Program            | Program               |                  |        |                    | Units   |  |
| First Cycle        | 1                     | Last Cycle       | 40     | Background         | 2-6     |  |
| Noiseband Method   | Auto                  | Noiseband        | 0.3649 | STD Dev Multiplier | 12.0000 |  |
| # of Fit Points    | 2                     | Threshold Method | Auto   | Threshold          | 0.3649  |  |

|             |             |
|-------------|-------------|
| Subset Name | All Samples |
|-------------|-------------|

## Results

| Inc                                 | Pos | Name     | Type    | CP    | Concentration | Standard | Status |
|-------------------------------------|-----|----------|---------|-------|---------------|----------|--------|
| <input checked="" type="checkbox"/> | A1  | GAPDH 1  | Unknown | 24.67 |               |          |        |
| <input checked="" type="checkbox"/> | A2  | GAPDH 1  | Unknown | 28.88 |               |          |        |
| <input checked="" type="checkbox"/> | A3  | GAPDH 1  | Unknown | 28.56 |               |          |        |
| <input checked="" type="checkbox"/> | A4  | GAPDH 2  | Unknown | 25.47 |               |          |        |
| <input checked="" type="checkbox"/> | A5  | GAPDH 2  | Unknown | 19.45 |               |          |        |
| <input checked="" type="checkbox"/> | A6  | GAPDH 2  | Unknown | 28.88 |               |          |        |
| <input checked="" type="checkbox"/> | A7  | GAPDH 3  | Unknown | 26.41 |               |          |        |
| <input checked="" type="checkbox"/> | A8  | GAPDH 3  | Unknown | 29.60 |               |          |        |
| <input checked="" type="checkbox"/> | A9  | GAPDH 3  | Unknown | 26.45 |               |          |        |
| <input checked="" type="checkbox"/> | A10 | GAPDH 4  | Unknown | 28.65 |               |          |        |
| <input checked="" type="checkbox"/> | A11 | GAPDH 4  | Unknown | 27.95 |               |          |        |
| <input checked="" type="checkbox"/> | A12 | GAPDH 4  | Unknown | 26.70 |               |          |        |
| <input checked="" type="checkbox"/> | B1  | FCER1A 1 | Unknown | 26.66 |               |          |        |
| <input checked="" type="checkbox"/> | B2  | FCER1A 1 | Unknown | 28.52 |               |          |        |
| <input checked="" type="checkbox"/> | B3  | FCER1A 1 | Unknown | 26.75 |               |          |        |
| <input checked="" type="checkbox"/> | B4  | FCER1A 2 | Unknown | 24.46 |               |          |        |
| <input checked="" type="checkbox"/> | B5  | FCER1A 2 | Unknown | 24.97 |               |          |        |
| <input checked="" type="checkbox"/> | B6  | FCER1A 2 | Unknown | 25.80 |               |          |        |
| <input checked="" type="checkbox"/> | B7  | FCER1A 3 | Unknown | 26.90 |               |          |        |
| <input checked="" type="checkbox"/> | B8  | FCER1A 3 | Unknown | 26.79 |               |          |        |
| <input checked="" type="checkbox"/> | B9  | FCER1A 3 | Unknown | 26.99 |               |          |        |
| <input checked="" type="checkbox"/> | B10 | FCER1A 4 | Unknown | 27.33 |               |          |        |
| <input checked="" type="checkbox"/> | B11 | FCER1A 4 | Unknown | 26.98 |               |          |        |
| <input checked="" type="checkbox"/> | B12 | FCER1A 4 | Unknown | 25.66 |               |          |        |
| <input checked="" type="checkbox"/> | C1  | RGS1 1   | Unknown | 30.33 |               |          |        |
| <input checked="" type="checkbox"/> | C2  | RGS1 1   | Unknown | 30.54 |               |          |        |
| <input checked="" type="checkbox"/> | C3  | RGS1 1   | Unknown | 29.76 |               |          |        |

## Results

| Inc                                 | Pos | Name     | Type    | CP    | Concentration | Standard | Status |
|-------------------------------------|-----|----------|---------|-------|---------------|----------|--------|
| <input checked="" type="checkbox"/> | C4  | RGS1 2   | Unknown | 28.99 |               |          |        |
| <input checked="" type="checkbox"/> | C5  | RGS1 2   | Unknown | 28.84 |               |          |        |
| <input checked="" type="checkbox"/> | C6  | RGS1 2   | Unknown | 28.67 |               |          |        |
| <input checked="" type="checkbox"/> | C7  | RGS1 3   | Unknown | 29.80 |               |          |        |
| <input checked="" type="checkbox"/> | C8  | RGS1 3   | Unknown | 29.67 |               |          |        |
| <input checked="" type="checkbox"/> | C9  | RGS1 3   | Unknown | 28.95 |               |          |        |
| <input checked="" type="checkbox"/> | C10 | RGS1 4   | Unknown | 31.55 |               |          |        |
| <input checked="" type="checkbox"/> | C11 | RGS1 4   | Unknown | 31.67 |               |          |        |
| <input checked="" type="checkbox"/> | C12 | RGS1 4   | Unknown | 31.38 |               |          |        |
| <input checked="" type="checkbox"/> | D1  | GAPDH 4  | Unknown | 26.52 |               |          |        |
| <input checked="" type="checkbox"/> | D2  | GAPDH 4  | Unknown | 24.43 |               |          |        |
| <input checked="" type="checkbox"/> | D3  | GAPDH 4  | Unknown | 27.83 |               |          |        |
| <input checked="" type="checkbox"/> | D4  | GAPDH 5  | Unknown | 26.58 |               |          |        |
| <input checked="" type="checkbox"/> | D5  | GAPDH 5  | Unknown | 27.78 |               |          |        |
| <input checked="" type="checkbox"/> | D6  | GAPDH 5  | Unknown | 30.44 |               |          |        |
| <input checked="" type="checkbox"/> | D7  | GAPDH 6  | Unknown | 28.47 |               |          |        |
| <input checked="" type="checkbox"/> | D8  | GAPDH 6  | Unknown | 27.58 |               |          |        |
| <input checked="" type="checkbox"/> | D9  | GAPDH 6  | Unknown | 28.52 |               |          |        |
| <input checked="" type="checkbox"/> | D10 | GAPDH 8  | Unknown | 27.62 |               |          |        |
| <input checked="" type="checkbox"/> | D11 | GAPDH 8  | Unknown | 29.47 |               |          |        |
| <input checked="" type="checkbox"/> | D12 | GAPDH 8  | Unknown | 26.48 |               |          |        |
| <input checked="" type="checkbox"/> | E1  | FCER1A 5 | Unknown | 28.46 |               |          |        |
| <input checked="" type="checkbox"/> | E2  | FCER1A 5 | Unknown | 26.42 |               |          |        |
| <input checked="" type="checkbox"/> | E3  | FCER1A 5 | Unknown | 26.80 |               |          |        |
| <input checked="" type="checkbox"/> | E4  | FCER1A 6 | Unknown | 26.61 |               |          |        |
| <input checked="" type="checkbox"/> | E5  | FCER1A 6 | Unknown | 22.90 |               |          |        |
| <input checked="" type="checkbox"/> | E6  | FCER1A 6 | Unknown | 27.35 |               |          |        |
| <input checked="" type="checkbox"/> | E7  | FCER1A 7 | Unknown | 25.72 |               |          |        |
| <input checked="" type="checkbox"/> | E8  | FCER1A 7 | Unknown | 24.44 |               |          |        |
| <input checked="" type="checkbox"/> | E9  | FCER1A 7 | Unknown | 28.70 |               |          |        |
| <input checked="" type="checkbox"/> | E10 | FCER1A 8 | Unknown | 26.61 |               |          |        |
| <input checked="" type="checkbox"/> | E11 | FCER1A 8 | Unknown | 25.90 |               |          |        |
| <input checked="" type="checkbox"/> | E12 | FCER1A 8 | Unknown | 26.73 |               |          |        |
| <input checked="" type="checkbox"/> | F1  | RGS1 5   | Unknown | 30.79 |               |          |        |
| <input checked="" type="checkbox"/> | F2  | RGS1 5   | Unknown | 31.22 |               |          |        |
| <input checked="" type="checkbox"/> | F3  | RGS1 5   | Unknown | 31.73 |               |          |        |
| <input checked="" type="checkbox"/> | F4  | RGS1 6   | Unknown | 30.33 |               |          |        |

## Results

| Inc                                 | Pos | Name   | Type    | CP    | Concentration | Standard | Status |
|-------------------------------------|-----|--------|---------|-------|---------------|----------|--------|
| <input checked="" type="checkbox"/> | F5  | RGS1 6 | Unknown | 30.36 |               |          |        |
| <input checked="" type="checkbox"/> | F6  | RGS1 6 | Unknown | 30.59 |               |          |        |
| <input checked="" type="checkbox"/> | F7  | RGS1 7 | Unknown | 29.33 |               |          |        |
| <input checked="" type="checkbox"/> | F8  | RGS1 7 | Unknown | 29.64 |               |          |        |
| <input checked="" type="checkbox"/> | F9  | RGS1 7 | Unknown | 28.93 |               |          |        |
| <input checked="" type="checkbox"/> | F10 | RGS1 8 | Unknown | 28.65 |               |          |        |
| <input checked="" type="checkbox"/> | F11 | RGS1 8 | Unknown | 28.93 |               |          |        |
| <input checked="" type="checkbox"/> | F12 | RGS1 8 | Unknown | 28.88 |               |          |        |
| <input checked="" type="checkbox"/> | G1  | blank  | Unknown | 35.70 |               |          |        |
| <input checked="" type="checkbox"/> | G2  | blank  | Unknown |       |               |          |        |
| <input checked="" type="checkbox"/> | G3  | blank  | Unknown |       |               |          |        |
| <input checked="" type="checkbox"/> | G4  | blank  | Unknown |       |               |          |        |
| <input checked="" type="checkbox"/> | G5  | blank  | Unknown |       |               |          |        |
| <input checked="" type="checkbox"/> | G6  | blank  | Unknown |       |               |          |        |
| <input checked="" type="checkbox"/> | G7  | blank  | Unknown |       |               |          |        |
| <input checked="" type="checkbox"/> | G8  | blank  | Unknown |       |               |          |        |
| <input checked="" type="checkbox"/> | G9  | blank  | Unknown |       |               |          |        |
| <input checked="" type="checkbox"/> | G10 | blank  | Unknown |       |               |          |        |
| <input checked="" type="checkbox"/> | G11 | blank  | Unknown |       |               |          |        |
| <input checked="" type="checkbox"/> | G12 | blank  | Unknown | 37.88 |               |          |        |
| <input checked="" type="checkbox"/> | H1  | blank  | Unknown |       |               |          |        |
| <input checked="" type="checkbox"/> | H2  | blank  | Unknown |       |               |          |        |
| <input checked="" type="checkbox"/> | H3  | blank  | Unknown |       |               |          |        |
| <input checked="" type="checkbox"/> | H4  | blank  | Unknown |       |               |          |        |
| <input checked="" type="checkbox"/> | H5  | blank  | Unknown |       |               |          |        |
| <input checked="" type="checkbox"/> | H6  | blank  | Unknown |       |               |          |        |
| <input checked="" type="checkbox"/> | H7  | blank  | Unknown | 33.44 |               |          |        |
| <input checked="" type="checkbox"/> | H8  | blank  | Unknown |       |               |          |        |
| <input checked="" type="checkbox"/> | H9  | blank  | Unknown |       |               |          |        |
| <input checked="" type="checkbox"/> | H10 | blank  | Unknown |       |               |          |        |
| <input checked="" type="checkbox"/> | H11 | blank  | Unknown |       |               |          |        |
| <input checked="" type="checkbox"/> | H12 | blank  | Unknown |       |               |          |        |

**Amplification Curves**

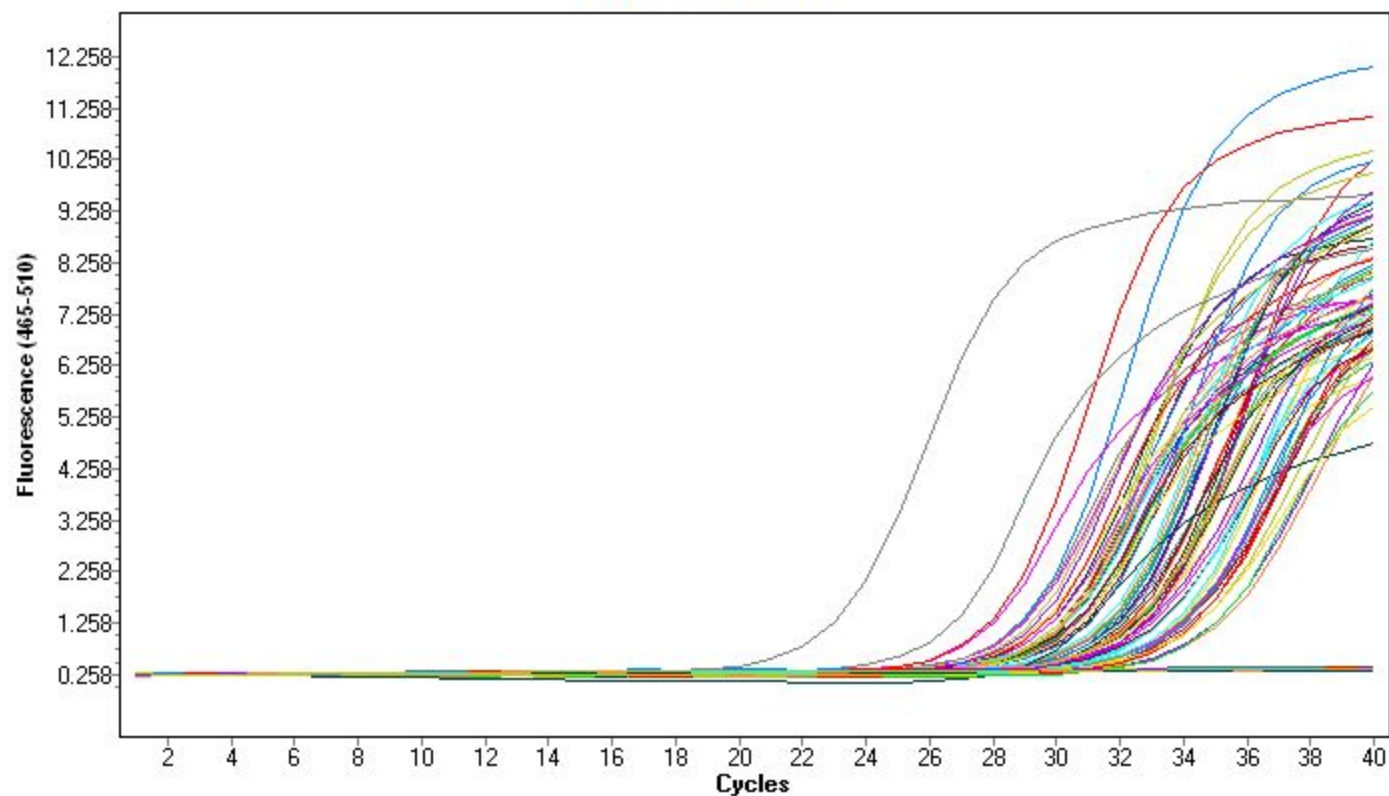

**Amplification Curves**

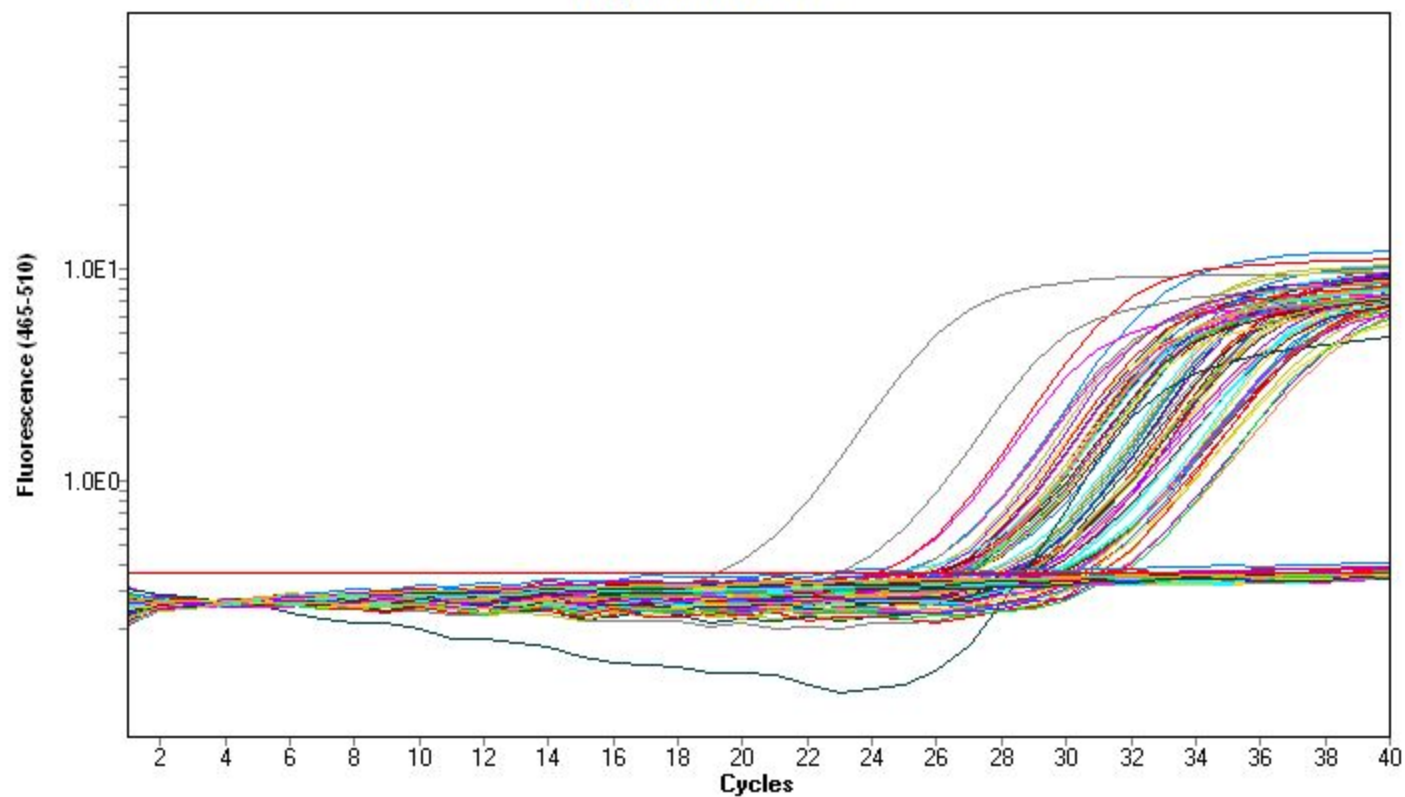



#### Analysis Notes

#### Gene Scanning for All Samples (1) (Gene Scanning)

|                |             |                     |             |
|----------------|-------------|---------------------|-------------|
| Channel        | 465-510     | Color Compensation  | Off         |
| Program Name   | Program     |                     |             |
| Std's Settings | Auto-Group  |                     |             |
| Sensitivity    | 0.30        | Threshold (TmShift) | 5.000       |
| Pre-melt       | 70.43-71.43 | Post-melt Temp      | 88.04-89.04 |

|             |             |
|-------------|-------------|
| Subset Name | All Samples |
|-------------|-------------|

## Results

| Inc                                 | Pos. | Sample Name | Sample Type | Group   | Status |
|-------------------------------------|------|-------------|-------------|---------|--------|
| <input checked="" type="checkbox"/> | A1   | GAPDH 1     | Unknown     | 3       |        |
| <input checked="" type="checkbox"/> | A2   | GAPDH 1     | Unknown     | 2       |        |
| <input checked="" type="checkbox"/> | A3   | GAPDH 1     | Unknown     | Unknown |        |
| <input checked="" type="checkbox"/> | A4   | GAPDH 2     | Unknown     | Unknown |        |
| <input checked="" type="checkbox"/> | A5   | GAPDH 2     | Unknown     | Unknown |        |
| <input checked="" type="checkbox"/> | A6   | GAPDH 2     | Unknown     | 2       |        |
| <input checked="" type="checkbox"/> | A7   | GAPDH 3     | Unknown     | Unknown |        |
| <input checked="" type="checkbox"/> | A8   | GAPDH 3     | Unknown     | Unknown |        |
| <input checked="" type="checkbox"/> | A9   | GAPDH 3     | Unknown     | Unknown |        |
| <input checked="" type="checkbox"/> | A10  | GAPDH 4     | Unknown     | 2       |        |
| <input checked="" type="checkbox"/> | A11  | GAPDH 4     | Unknown     | 2       |        |
| <input checked="" type="checkbox"/> | A12  | GAPDH 4     | Unknown     | 2       |        |
| <input checked="" type="checkbox"/> | B1   | FCER1A 1    | Unknown     | 3       |        |
| <input checked="" type="checkbox"/> | B2   | FCER1A 1    | Unknown     | 4       |        |
| <input checked="" type="checkbox"/> | B3   | FCER1A 1    | Unknown     | 3       |        |
| <input checked="" type="checkbox"/> | B4   | FCER1A 2    | Unknown     | 3       |        |
| <input checked="" type="checkbox"/> | B5   | FCER1A 2    | Unknown     | 4       |        |
| <input checked="" type="checkbox"/> | B6   | FCER1A 2    | Unknown     | Unknown |        |
| <input checked="" type="checkbox"/> | B7   | FCER1A 3    | Unknown     | 4       |        |
| <input checked="" type="checkbox"/> | B8   | FCER1A 3    | Unknown     | 6       |        |
| <input checked="" type="checkbox"/> | B9   | FCER1A 3    | Unknown     | Unknown |        |
| <input checked="" type="checkbox"/> | B10  | FCER1A 4    | Unknown     | 4       |        |
| <input checked="" type="checkbox"/> | B11  | FCER1A 4    | Unknown     | Unknown |        |
| <input checked="" type="checkbox"/> | B12  | FCER1A 4    | Unknown     | 3       |        |
| <input checked="" type="checkbox"/> | C1   | RGS1 1      | Unknown     | Unknown |        |
| <input checked="" type="checkbox"/> | C2   | RGS1 1      | Unknown     | 1       |        |
| <input checked="" type="checkbox"/> | C3   | RGS1 1      | Unknown     | Unknown |        |
| <input checked="" type="checkbox"/> | C4   | RGS1 2      | Unknown     | 1       |        |
| <input checked="" type="checkbox"/> | C5   | RGS1 2      | Unknown     | 1       |        |
| <input checked="" type="checkbox"/> | C6   | RGS1 2      | Unknown     | Unknown |        |
| <input checked="" type="checkbox"/> | C7   | RGS1 3      | Unknown     | 1       |        |

## Results

| Inc                                 | Pos. | Sample Name | Sample Type | Group   | Status |
|-------------------------------------|------|-------------|-------------|---------|--------|
| <input checked="" type="checkbox"/> | C8   | RGS1 3      | Unknown     | 1       |        |
| <input checked="" type="checkbox"/> | C9   | RGS1 3      | Unknown     | 5       |        |
| <input checked="" type="checkbox"/> | C10  | RGS1 4      | Unknown     | 1       |        |
| <input checked="" type="checkbox"/> | C11  | RGS1 4      | Unknown     | 1       |        |
| <input checked="" type="checkbox"/> | C12  | RGS1 4      | Unknown     | 1       |        |
| <input checked="" type="checkbox"/> | D1   | GAPDH 4     | Unknown     | 2       |        |
| <input checked="" type="checkbox"/> | D2   | GAPDH 4     | Unknown     | Unknown |        |
| <input checked="" type="checkbox"/> | D3   | GAPDH 4     | Unknown     | 2       |        |
| <input checked="" type="checkbox"/> | D4   | GAPDH 5     | Unknown     | 2       |        |
| <input checked="" type="checkbox"/> | D5   | GAPDH 5     | Unknown     | 2       |        |
| <input checked="" type="checkbox"/> | D6   | GAPDH 5     | Unknown     | 2       |        |
| <input checked="" type="checkbox"/> | D7   | GAPDH 6     | Unknown     | 2       |        |
| <input checked="" type="checkbox"/> | D8   | GAPDH 6     | Unknown     | 2       |        |
| <input checked="" type="checkbox"/> | D9   | GAPDH 6     | Unknown     | Unknown |        |
| <input checked="" type="checkbox"/> | D10  | GAPDH 8     | Unknown     | Unknown |        |
| <input checked="" type="checkbox"/> | D11  | GAPDH 8     | Unknown     | Unknown |        |
| <input checked="" type="checkbox"/> | D12  | GAPDH 8     | Unknown     | Unknown |        |
| <input checked="" type="checkbox"/> | E1   | FCER1A 5    | Unknown     | 3       |        |
| <input checked="" type="checkbox"/> | E2   | FCER1A 5    | Unknown     | 3       |        |
| <input checked="" type="checkbox"/> | E3   | FCER1A 5    | Unknown     | 3       |        |
| <input checked="" type="checkbox"/> | E4   | FCER1A 6    | Unknown     | 6       |        |
| <input checked="" type="checkbox"/> | E5   | FCER1A 6    | Unknown     | Unknown |        |
| <input checked="" type="checkbox"/> | E6   | FCER1A 6    | Unknown     | 4       |        |
| <input checked="" type="checkbox"/> | E7   | FCER1A 7    | Unknown     | 4       |        |
| <input checked="" type="checkbox"/> | E8   | FCER1A 7    | Unknown     | 4       |        |
| <input checked="" type="checkbox"/> | E9   | FCER1A 7    | Unknown     | Unknown |        |
| <input checked="" type="checkbox"/> | E10  | FCER1A 8    | Unknown     | 3       |        |
| <input checked="" type="checkbox"/> | E11  | FCER1A 8    | Unknown     | 3       |        |
| <input checked="" type="checkbox"/> | E12  | FCER1A 8    | Unknown     | 3       |        |
| <input checked="" type="checkbox"/> | F1   | RGS1 5      | Unknown     | 5       |        |
| <input checked="" type="checkbox"/> | F2   | RGS1 5      | Unknown     | 5       |        |
| <input checked="" type="checkbox"/> | F3   | RGS1 5      | Unknown     | 5       |        |
| <input checked="" type="checkbox"/> | F4   | RGS1 6      | Unknown     | 1       |        |
| <input checked="" type="checkbox"/> | F5   | RGS1 6      | Unknown     | 1       |        |
| <input checked="" type="checkbox"/> | F6   | RGS1 6      | Unknown     | 1       |        |
| <input checked="" type="checkbox"/> | F7   | RGS1 7      | Unknown     | 1       |        |
| <input checked="" type="checkbox"/> | F8   | RGS1 7      | Unknown     | 1       |        |
| <input checked="" type="checkbox"/> | F9   | RGS1 7      | Unknown     | 1       |        |

## Results

| Inc                                 | Pos. | Sample Name | Sample Type | Group    | Status |
|-------------------------------------|------|-------------|-------------|----------|--------|
| <input checked="" type="checkbox"/> | F10  | RGS1 8      | Unknown     | Unknown  |        |
| <input checked="" type="checkbox"/> | F11  | RGS1 8      | Unknown     | Unknown  |        |
| <input checked="" type="checkbox"/> | F12  | RGS1 8      | Unknown     | 1        |        |
| <input checked="" type="checkbox"/> | G1   | blank       | Unknown     | Negative |        |
| <input checked="" type="checkbox"/> | G2   | blank       | Unknown     | Negative |        |
| <input checked="" type="checkbox"/> | G3   | blank       | Unknown     | Negative |        |
| <input checked="" type="checkbox"/> | G4   | blank       | Unknown     | Negative |        |
| <input checked="" type="checkbox"/> | G5   | blank       | Unknown     | Negative |        |
| <input checked="" type="checkbox"/> | G6   | blank       | Unknown     | Negative |        |
| <input checked="" type="checkbox"/> | G7   | blank       | Unknown     | Negative |        |
| <input checked="" type="checkbox"/> | G8   | blank       | Unknown     | Negative |        |
| <input checked="" type="checkbox"/> | G9   | blank       | Unknown     | Negative |        |
| <input checked="" type="checkbox"/> | G10  | blank       | Unknown     | Negative |        |
| <input checked="" type="checkbox"/> | G11  | blank       | Unknown     | Negative |        |
| <input checked="" type="checkbox"/> | G12  | blank       | Unknown     | Negative |        |
| <input checked="" type="checkbox"/> | H1   | blank       | Unknown     | Negative |        |
| <input checked="" type="checkbox"/> | H2   | blank       | Unknown     | Negative |        |
| <input checked="" type="checkbox"/> | H3   | blank       | Unknown     | Negative |        |
| <input checked="" type="checkbox"/> | H4   | blank       | Unknown     | Negative |        |
| <input checked="" type="checkbox"/> | H5   | blank       | Unknown     | Negative |        |
| <input checked="" type="checkbox"/> | H6   | blank       | Unknown     | Negative |        |
| <input checked="" type="checkbox"/> | H7   | blank       | Unknown     | Negative |        |
| <input checked="" type="checkbox"/> | H8   | blank       | Unknown     | Negative |        |
| <input checked="" type="checkbox"/> | H9   | blank       | Unknown     | Negative |        |
| <input checked="" type="checkbox"/> | H10  | blank       | Unknown     | Negative |        |
| <input checked="" type="checkbox"/> | H11  | blank       | Unknown     | Negative |        |
| <input checked="" type="checkbox"/> | H12  | blank       | Unknown     | Negative |        |

## Group 1

| Inc                                 | Pos | Sample Name | Sample Type |
|-------------------------------------|-----|-------------|-------------|
| <input checked="" type="checkbox"/> | C2  | RGS1 1      | Unknown     |
| <input checked="" type="checkbox"/> | C4  | RGS1 2      | Unknown     |
| <input checked="" type="checkbox"/> | C5  | RGS1 2      | Unknown     |
| <input checked="" type="checkbox"/> | C7  | RGS1 3      | Unknown     |
| <input checked="" type="checkbox"/> | C8  | RGS1 3      | Unknown     |
| <input checked="" type="checkbox"/> | C10 | RGS1 4      | Unknown     |
| <input checked="" type="checkbox"/> | C11 | RGS1 4      | Unknown     |
| <input checked="" type="checkbox"/> | C12 | RGS1 4      | Unknown     |
| <input checked="" type="checkbox"/> | F4  | RGS1 6      | Unknown     |



| <b>Group 1</b>                      |     |             |             |
|-------------------------------------|-----|-------------|-------------|
| Inc                                 | Pos | Sample Name | Sample Type |
| <input checked="" type="checkbox"/> | F5  | RGS1 6      | Unknown     |
| <input checked="" type="checkbox"/> | F6  | RGS1 6      | Unknown     |
| <input checked="" type="checkbox"/> | F7  | RGS1 7      | Unknown     |
| <input checked="" type="checkbox"/> | F8  | RGS1 7      | Unknown     |
| <input checked="" type="checkbox"/> | F9  | RGS1 7      | Unknown     |
| <input checked="" type="checkbox"/> | F12 | RGS1 8      | Unknown     |
| <b>Group 2</b>                      |     |             |             |
| Inc                                 | Pos | Sample Name | Sample Type |
| <input checked="" type="checkbox"/> | A2  | GAPDH 1     | Unknown     |
| <input checked="" type="checkbox"/> | A6  | GAPDH 2     | Unknown     |
| <input checked="" type="checkbox"/> | A10 | GAPDH 4     | Unknown     |
| <input checked="" type="checkbox"/> | A11 | GAPDH 4     | Unknown     |
| <input checked="" type="checkbox"/> | A12 | GAPDH 4     | Unknown     |
| <input checked="" type="checkbox"/> | D1  | GAPDH 4     | Unknown     |
| <input checked="" type="checkbox"/> | D3  | GAPDH 4     | Unknown     |
| <input checked="" type="checkbox"/> | D4  | GAPDH 5     | Unknown     |
| <input checked="" type="checkbox"/> | D5  | GAPDH 5     | Unknown     |
| <input checked="" type="checkbox"/> | D6  | GAPDH 5     | Unknown     |
| <input checked="" type="checkbox"/> | D7  | GAPDH 6     | Unknown     |
| <input checked="" type="checkbox"/> | D8  | GAPDH 6     | Unknown     |
| <b>Group 3</b>                      |     |             |             |
| Inc                                 | Pos | Sample Name | Sample Type |
| <input checked="" type="checkbox"/> | A1  | GAPDH 1     | Unknown     |
| <input checked="" type="checkbox"/> | B1  | FCER1A 1    | Unknown     |
| <input checked="" type="checkbox"/> | B3  | FCER1A 1    | Unknown     |
| <input checked="" type="checkbox"/> | B4  | FCER1A 2    | Unknown     |
| <input checked="" type="checkbox"/> | B12 | FCER1A 4    | Unknown     |
| <input checked="" type="checkbox"/> | E1  | FCER1A 5    | Unknown     |
| <input checked="" type="checkbox"/> | E2  | FCER1A 5    | Unknown     |
| <input checked="" type="checkbox"/> | E3  | FCER1A 5    | Unknown     |
| <input checked="" type="checkbox"/> | E10 | FCER1A 8    | Unknown     |
| <input checked="" type="checkbox"/> | E11 | FCER1A 8    | Unknown     |
| <input checked="" type="checkbox"/> | E12 | FCER1A 8    | Unknown     |
| <b>Group 4</b>                      |     |             |             |
| Inc                                 | Pos | Sample Name | Sample Type |
| <input checked="" type="checkbox"/> | B2  | FCER1A 1    | Unknown     |
| <input checked="" type="checkbox"/> | B5  | FCER1A 2    | Unknown     |

| <b>Group</b> 4                      |     |             |             |
|-------------------------------------|-----|-------------|-------------|
| Inc                                 | Pos | Sample Name | Sample Type |
| <input checked="" type="checkbox"/> | B7  | FCER1A 3    | Unknown     |
| <input checked="" type="checkbox"/> | B10 | FCER1A 4    | Unknown     |
| <input checked="" type="checkbox"/> | E6  | FCER1A 6    | Unknown     |
| <input checked="" type="checkbox"/> | E7  | FCER1A 7    | Unknown     |
| <input checked="" type="checkbox"/> | E8  | FCER1A 7    | Unknown     |
| <b>Group</b> 5                      |     |             |             |
| Inc                                 | Pos | Sample Name | Sample Type |
| <input checked="" type="checkbox"/> | C9  | RGS1 3      | Unknown     |
| <input checked="" type="checkbox"/> | F1  | RGS1 5      | Unknown     |
| <input checked="" type="checkbox"/> | F2  | RGS1 5      | Unknown     |
| <input checked="" type="checkbox"/> | F3  | RGS1 5      | Unknown     |
| <b>Group</b> 6                      |     |             |             |
| Inc                                 | Pos | Sample Name | Sample Type |
| <input checked="" type="checkbox"/> | B8  | FCER1A 3    | Unknown     |
| <input checked="" type="checkbox"/> | E4  | FCER1A 6    | Unknown     |
| <b>Group</b> Negative               |     |             |             |
| Inc                                 | Pos | Sample Name | Sample Type |
| <input checked="" type="checkbox"/> | G1  | blank       | Unknown     |
| <input checked="" type="checkbox"/> | G2  | blank       | Unknown     |
| <input checked="" type="checkbox"/> | G3  | blank       | Unknown     |
| <input checked="" type="checkbox"/> | G4  | blank       | Unknown     |
| <input checked="" type="checkbox"/> | G5  | blank       | Unknown     |
| <input checked="" type="checkbox"/> | G6  | blank       | Unknown     |
| <input checked="" type="checkbox"/> | G7  | blank       | Unknown     |
| <input checked="" type="checkbox"/> | G8  | blank       | Unknown     |
| <input checked="" type="checkbox"/> | G9  | blank       | Unknown     |
| <input checked="" type="checkbox"/> | G10 | blank       | Unknown     |
| <input checked="" type="checkbox"/> | G11 | blank       | Unknown     |
| <input checked="" type="checkbox"/> | G12 | blank       | Unknown     |
| <input checked="" type="checkbox"/> | H1  | blank       | Unknown     |
| <input checked="" type="checkbox"/> | H2  | blank       | Unknown     |
| <input checked="" type="checkbox"/> | H3  | blank       | Unknown     |
| <input checked="" type="checkbox"/> | H4  | blank       | Unknown     |
| <input checked="" type="checkbox"/> | H5  | blank       | Unknown     |
| <input checked="" type="checkbox"/> | H6  | blank       | Unknown     |
| <input checked="" type="checkbox"/> | H7  | blank       | Unknown     |
| <input checked="" type="checkbox"/> | H8  | blank       | Unknown     |

| Group Negative                      |     |             |             |
|-------------------------------------|-----|-------------|-------------|
| Inc                                 | Pos | Sample Name | Sample Type |
| <input checked="" type="checkbox"/> | H9  | blank       | Unknown     |
| <input checked="" type="checkbox"/> | H10 | blank       | Unknown     |
| <input checked="" type="checkbox"/> | H11 | blank       | Unknown     |
| <input checked="" type="checkbox"/> | H12 | blank       | Unknown     |

  

| Group Unknown                       |     |             |             |
|-------------------------------------|-----|-------------|-------------|
| Inc                                 | Pos | Sample Name | Sample Type |
| <input checked="" type="checkbox"/> | A3  | GAPDH 1     | Unknown     |
| <input checked="" type="checkbox"/> | A4  | GAPDH 2     | Unknown     |
| <input checked="" type="checkbox"/> | A5  | GAPDH 2     | Unknown     |
| <input checked="" type="checkbox"/> | A7  | GAPDH 3     | Unknown     |
| <input checked="" type="checkbox"/> | A8  | GAPDH 3     | Unknown     |
| <input checked="" type="checkbox"/> | A9  | GAPDH 3     | Unknown     |
| <input checked="" type="checkbox"/> | B6  | FCER1A 2    | Unknown     |
| <input checked="" type="checkbox"/> | B9  | FCER1A 3    | Unknown     |
| <input checked="" type="checkbox"/> | B11 | FCER1A 4    | Unknown     |
| <input checked="" type="checkbox"/> | C1  | RGS1 1      | Unknown     |
| <input checked="" type="checkbox"/> | C3  | RGS1 1      | Unknown     |
| <input checked="" type="checkbox"/> | C6  | RGS1 2      | Unknown     |
| <input checked="" type="checkbox"/> | D2  | GAPDH 4     | Unknown     |
| <input checked="" type="checkbox"/> | D9  | GAPDH 6     | Unknown     |
| <input checked="" type="checkbox"/> | D10 | GAPDH 8     | Unknown     |
| <input checked="" type="checkbox"/> | D11 | GAPDH 8     | Unknown     |
| <input checked="" type="checkbox"/> | D12 | GAPDH 8     | Unknown     |
| <input checked="" type="checkbox"/> | E5  | FCER1A 6    | Unknown     |
| <input checked="" type="checkbox"/> | E9  | FCER1A 7    | Unknown     |
| <input checked="" type="checkbox"/> | F10 | RGS1 8      | Unknown     |
| <input checked="" type="checkbox"/> | F11 | RGS1 8      | Unknown     |

**Melting Curves**



**Normalized Melting Curves**

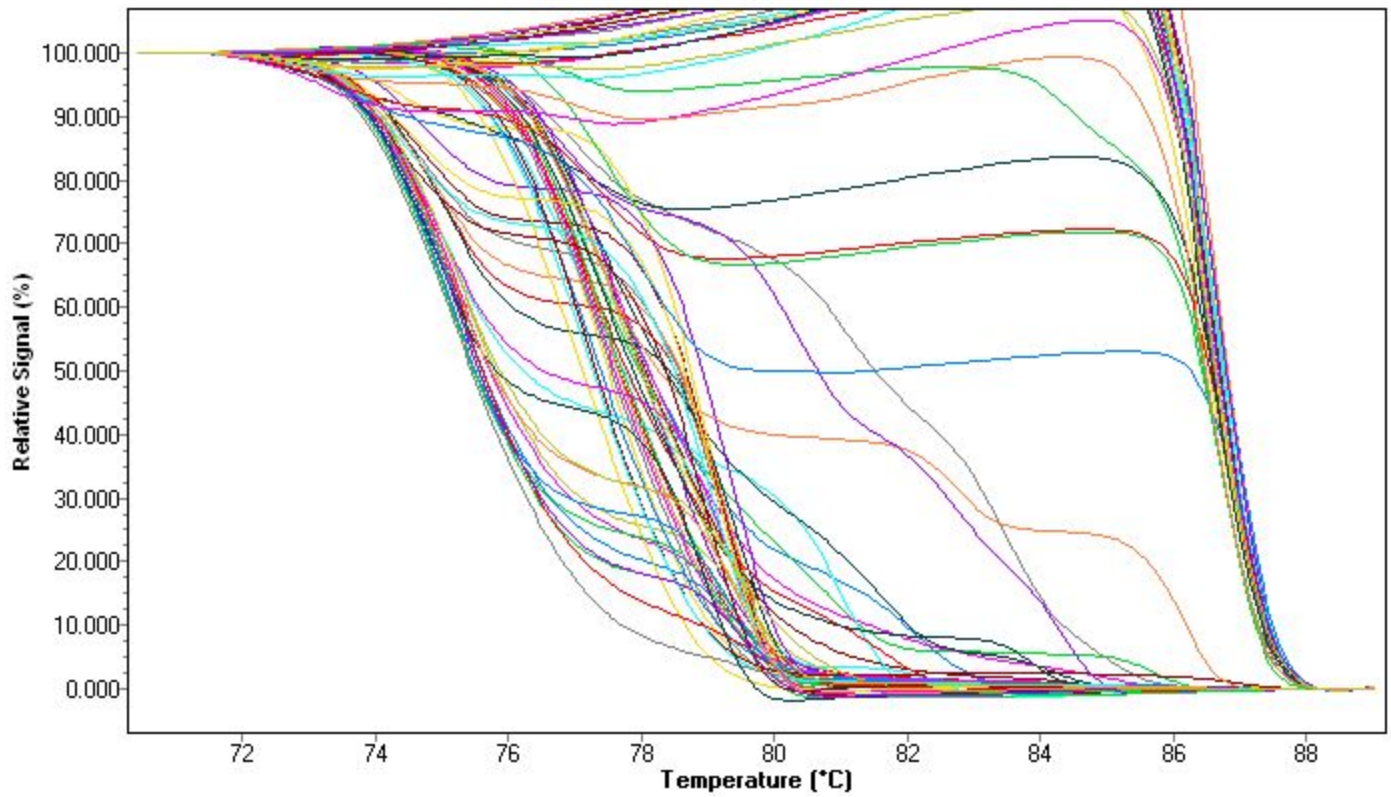

**Normalized and Shifted Melting Curves**

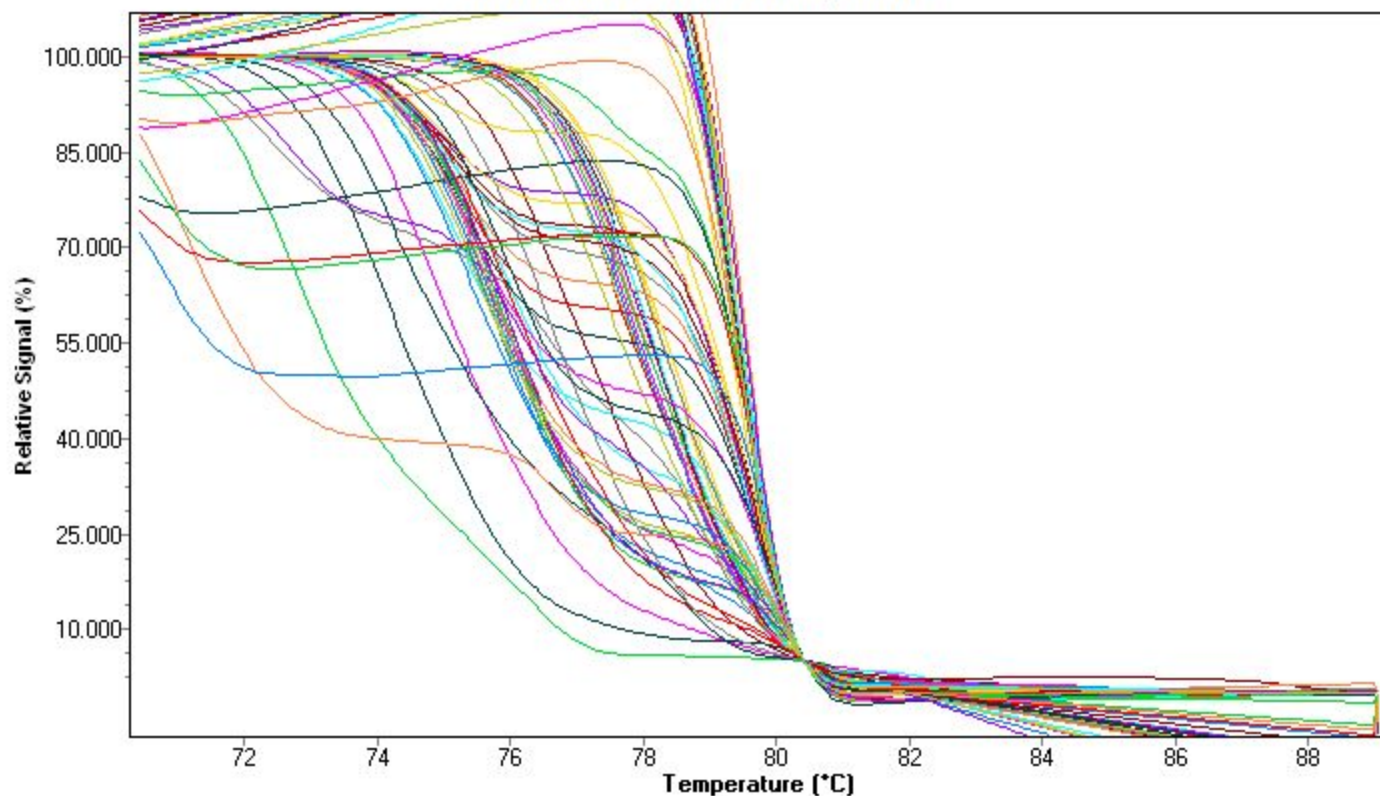

**Normalized and Temp-Shifted Difference Plot**

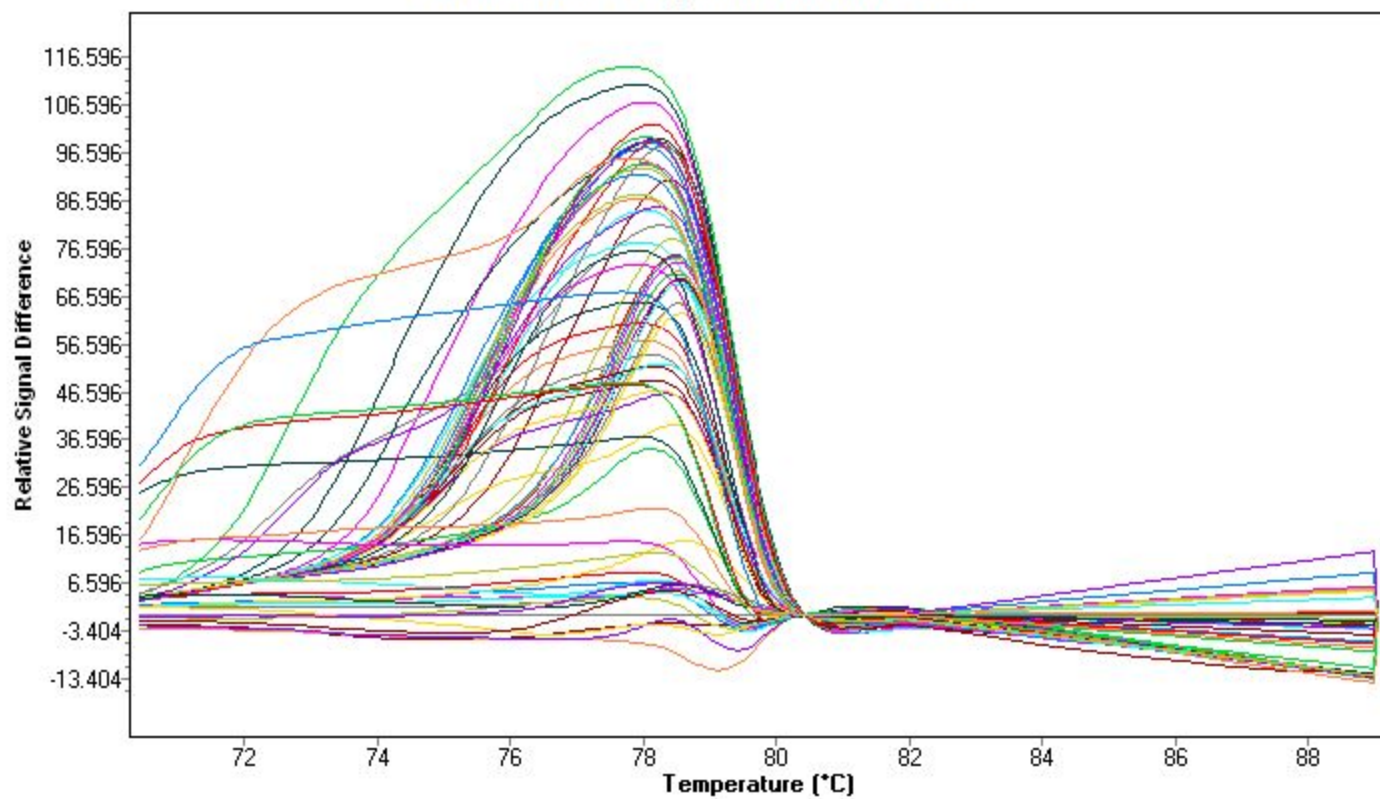

**Analysis Notes**

## Melt Curve Genotyping for All Samples (1) (Melt Curve Genotyping)

|                |            |                    |       |
|----------------|------------|--------------------|-------|
| Channel        | 465-510    | Color Compensation | Off   |
| Program Name   | Program    |                    |       |
| Std's Settings | Auto-Group |                    |       |
| Sensitivity    | Normal     | Temp Range         | 62-86 |
| Score          | 0.7        | Res                | 0.1   |

|             |             |
|-------------|-------------|
| Subset Name | All Samples |
|-------------|-------------|

### Results

| Inc                                 | Pos. | Sample Name | Sample Type | Group   | Score | Resolution | Status |
|-------------------------------------|------|-------------|-------------|---------|-------|------------|--------|
| <input checked="" type="checkbox"/> | A1   | GAPDH 1     | Unknown     | 1       | 0.98  | 0.39       |        |
| <input checked="" type="checkbox"/> | A2   | GAPDH 1     | Unknown     | 1       | 0.95  | 0.62       |        |
| <input checked="" type="checkbox"/> | A3   | GAPDH 1     | Unknown     | 1       | 0.98  | 0.41       |        |
| <input checked="" type="checkbox"/> | A4   | GAPDH 2     | Unknown     | 1       | 0.98  | 0.50       |        |
| <input checked="" type="checkbox"/> | A5   | GAPDH 2     | Unknown     | 3       | 1.00  | 0.51       |        |
| <input checked="" type="checkbox"/> | A6   | GAPDH 2     | Unknown     | 1       | 0.93  | 0.66       |        |
| <input checked="" type="checkbox"/> | A7   | GAPDH 3     | Unknown     | 1       | 0.98  | 0.53       |        |
| <input checked="" type="checkbox"/> | A8   | GAPDH 3     | Unknown     | 1       | 0.91  | 0.22       |        |
| <input checked="" type="checkbox"/> | A9   | GAPDH 3     | Unknown     | 1       | 0.96  | 0.28       |        |
| <input checked="" type="checkbox"/> | A10  | GAPDH 4     | Unknown     | 1       | 0.93  | 0.63       |        |
| <input checked="" type="checkbox"/> | A11  | GAPDH 4     | Unknown     | 1       | 0.94  | 0.58       |        |
| <input checked="" type="checkbox"/> | A12  | GAPDH 4     | Unknown     | 1       | 0.96  | 0.57       |        |
| <input checked="" type="checkbox"/> | B1   | FCER1A 1    | Unknown     | 1       | 0.98  | 0.82       |        |
| <input checked="" type="checkbox"/> | B2   | FCER1A 1    | Unknown     | Unknown | 0.63  | 0.07       |        |
| <input checked="" type="checkbox"/> | B3   | FCER1A 1    | Unknown     | 1       | 0.96  | 0.82       |        |
| <input checked="" type="checkbox"/> | B4   | FCER1A 2    | Unknown     | 1       | 0.96  | 0.77       |        |
| <input checked="" type="checkbox"/> | B5   | FCER1A 2    | Unknown     | Unknown | 0.67  | 0.05       |        |
| <input checked="" type="checkbox"/> | B6   | FCER1A 2    | Unknown     | 1       | 0.83  | 0.36       |        |
| <input checked="" type="checkbox"/> | B7   | FCER1A 3    | Unknown     | Unknown | 0.67  | 0.05       |        |
| <input checked="" type="checkbox"/> | B8   | FCER1A 3    | Unknown     | 1       | 0.79  | 0.38       |        |
| <input checked="" type="checkbox"/> | B9   | FCER1A 3    | Unknown     | Unknown | 0.65  | 0.09       |        |
| <input checked="" type="checkbox"/> | B10  | FCER1A 4    | Unknown     | Unknown | 0.62  |            |        |
| <input checked="" type="checkbox"/> | B11  | FCER1A 4    | Unknown     | Unknown | 0.73  | 0.08       |        |
| <input checked="" type="checkbox"/> | B12  | FCER1A 4    | Unknown     | 1       | 0.95  | 0.75       |        |
| <input checked="" type="checkbox"/> | C1   | RGS1 1      | Unknown     | 2       | 0.99  | 0.72       |        |
| <input checked="" type="checkbox"/> | C2   | RGS1 1      | Unknown     | 2       | 1.00  | 0.77       |        |
| <input checked="" type="checkbox"/> | C3   | RGS1 1      | Unknown     | 2       | 0.89  | 0.42       |        |
| <input checked="" type="checkbox"/> | C4   | RGS1 2      | Unknown     | 2       | 0.99  | 0.75       |        |
| <input checked="" type="checkbox"/> | C5   | RGS1 2      | Unknown     | 2       | 0.99  | 0.74       |        |
| <input checked="" type="checkbox"/> | C6   | RGS1 2      | Unknown     | 2       | 0.98  | 0.78       |        |
| <input checked="" type="checkbox"/> | C7   | RGS1 3      | Unknown     | 2       | 0.97  | 0.84       |        |

## Results

| Inc                                 | Pos. | Sample Name | Sample Type | Group   | Score | Resolution | Status |
|-------------------------------------|------|-------------|-------------|---------|-------|------------|--------|
| <input checked="" type="checkbox"/> | C8   | RGS1 3      | Unknown     | 2       | 0.99  | 0.77       |        |
| <input checked="" type="checkbox"/> | C9   | RGS1 3      | Unknown     | 2       | 0.88  | 0.49       |        |
| <input checked="" type="checkbox"/> | C10  | RGS1 4      | Unknown     | 2       | 0.97  | 0.82       |        |
| <input checked="" type="checkbox"/> | C11  | RGS1 4      | Unknown     | 2       | 0.97  | 0.80       |        |
| <input checked="" type="checkbox"/> | C12  | RGS1 4      | Unknown     | 2       | 0.98  | 0.80       |        |
| <input checked="" type="checkbox"/> | D1   | GAPDH 4     | Unknown     | 1       | 0.95  | 0.67       |        |
| <input checked="" type="checkbox"/> | D2   | GAPDH 4     | Unknown     | 1       | 1.00  | 0.51       |        |
| <input checked="" type="checkbox"/> | D3   | GAPDH 4     | Unknown     | 1       | 0.96  | 0.61       |        |
| <input checked="" type="checkbox"/> | D4   | GAPDH 5     | Unknown     | 1       | 0.94  | 0.63       |        |
| <input checked="" type="checkbox"/> | D5   | GAPDH 5     | Unknown     | 1       | 0.94  | 0.65       |        |
| <input checked="" type="checkbox"/> | D6   | GAPDH 5     | Unknown     | 1       | 0.93  | 0.72       |        |
| <input checked="" type="checkbox"/> | D7   | GAPDH 6     | Unknown     | 1       | 0.93  | 0.69       |        |
| <input checked="" type="checkbox"/> | D8   | GAPDH 6     | Unknown     | 1       | 0.94  | 0.69       |        |
| <input checked="" type="checkbox"/> | D9   | GAPDH 6     | Unknown     | 1       | 0.98  | 0.52       |        |
| <input checked="" type="checkbox"/> | D10  | GAPDH 8     | Unknown     | 1       | 0.81  | 0.18       |        |
| <input checked="" type="checkbox"/> | D11  | GAPDH 8     | Unknown     | 3       | 0.98  | 0.34       |        |
| <input checked="" type="checkbox"/> | D12  | GAPDH 8     | Unknown     | 1       | 0.97  | 0.56       |        |
| <input checked="" type="checkbox"/> | E1   | FCER1A 5    | Unknown     | 1       | 0.91  | 0.70       |        |
| <input checked="" type="checkbox"/> | E2   | FCER1A 5    | Unknown     | 1       | 0.98  | 0.84       |        |
| <input checked="" type="checkbox"/> | E3   | FCER1A 5    | Unknown     | 1       | 0.94  | 0.76       |        |
| <input checked="" type="checkbox"/> | E4   | FCER1A 6    | Unknown     | 1       | 0.73  | 0.30       |        |
| <input checked="" type="checkbox"/> | E5   | FCER1A 6    | Unknown     | 1       | 0.95  | 0.86       |        |
| <input checked="" type="checkbox"/> | E6   | FCER1A 6    | Unknown     | 1       | 0.73  | 0.15       |        |
| <input checked="" type="checkbox"/> | E7   | FCER1A 7    | Unknown     | 1       | 0.70  | 0.15       |        |
| <input checked="" type="checkbox"/> | E8   | FCER1A 7    | Unknown     | 1       | 0.75  | 0.19       |        |
| <input checked="" type="checkbox"/> | E9   | FCER1A 7    | Unknown     | 1       | 0.80  | 0.53       |        |
| <input checked="" type="checkbox"/> | E10  | FCER1A 8    | Unknown     | 1       | 0.88  | 0.61       |        |
| <input checked="" type="checkbox"/> | E11  | FCER1A 8    | Unknown     | 1       | 0.97  | 0.81       |        |
| <input checked="" type="checkbox"/> | E12  | FCER1A 8    | Unknown     | 1       | 0.90  | 0.65       |        |
| <input checked="" type="checkbox"/> | F1   | RGS1 5      | Unknown     | Unknown | 0.58  | 0.05       |        |
| <input checked="" type="checkbox"/> | F2   | RGS1 5      | Unknown     | 2       | 0.78  | 0.33       |        |
| <input checked="" type="checkbox"/> | F3   | RGS1 5      | Unknown     | Unknown | 0.66  | 0.09       |        |
| <input checked="" type="checkbox"/> | F4   | RGS1 6      | Unknown     | 2       | 0.94  | 0.72       |        |
| <input checked="" type="checkbox"/> | F5   | RGS1 6      | Unknown     | 2       | 0.99  | 0.78       |        |
| <input checked="" type="checkbox"/> | F6   | RGS1 6      | Unknown     | 2       | 0.98  | 0.81       |        |
| <input checked="" type="checkbox"/> | F7   | RGS1 7      | Unknown     | 2       | 0.98  | 0.83       |        |
| <input checked="" type="checkbox"/> | F8   | RGS1 7      | Unknown     | 2       | 0.97  | 0.75       |        |
| <input checked="" type="checkbox"/> | F9   | RGS1 7      | Unknown     | 2       | 0.99  | 0.76       |        |

## Results

| Inc                                 | Pos. | Sample Name | Sample Type | Group    | Score | Resolution | Status |
|-------------------------------------|------|-------------|-------------|----------|-------|------------|--------|
| <input checked="" type="checkbox"/> | F10  | RGS1 8      | Unknown     | 2        | 0.95  | 0.62       |        |
| <input checked="" type="checkbox"/> | F11  | RGS1 8      | Unknown     | 2        | 0.99  | 0.76       |        |
| <input checked="" type="checkbox"/> | F12  | RGS1 8      | Unknown     | 2        | 0.99  | 0.73       |        |
| <input checked="" type="checkbox"/> | G1   | blank       | Unknown     | Negative | 1.00  | 1.00       |        |
| <input checked="" type="checkbox"/> | G2   | blank       | Unknown     | Negative | 1.00  | 1.00       |        |
| <input checked="" type="checkbox"/> | G3   | blank       | Unknown     | Negative | 1.00  | 1.00       |        |
| <input checked="" type="checkbox"/> | G4   | blank       | Unknown     | Negative | 1.00  | 1.00       |        |
| <input checked="" type="checkbox"/> | G5   | blank       | Unknown     | Negative | 1.00  | 1.00       |        |
| <input checked="" type="checkbox"/> | G6   | blank       | Unknown     | Negative | 1.00  | 1.00       |        |
| <input checked="" type="checkbox"/> | G7   | blank       | Unknown     | Negative | 1.00  | 1.00       |        |
| <input checked="" type="checkbox"/> | G8   | blank       | Unknown     | Negative | 1.00  | 1.00       |        |
| <input checked="" type="checkbox"/> | G9   | blank       | Unknown     | Negative | 1.00  | 1.00       |        |
| <input checked="" type="checkbox"/> | G10  | blank       | Unknown     | Negative | 1.00  | 1.00       |        |
| <input checked="" type="checkbox"/> | G11  | blank       | Unknown     | Negative | 1.00  | 1.00       |        |
| <input checked="" type="checkbox"/> | G12  | blank       | Unknown     | Negative | 1.00  | 1.00       |        |
| <input checked="" type="checkbox"/> | H1   | blank       | Unknown     | Negative | 1.00  | 1.00       |        |
| <input checked="" type="checkbox"/> | H2   | blank       | Unknown     | Negative | 1.00  | 1.00       |        |
| <input checked="" type="checkbox"/> | H3   | blank       | Unknown     | Negative | 1.00  | 1.00       |        |
| <input checked="" type="checkbox"/> | H4   | blank       | Unknown     | Negative | 1.00  | 1.00       |        |
| <input checked="" type="checkbox"/> | H5   | blank       | Unknown     | Negative | 1.00  | 1.00       |        |
| <input checked="" type="checkbox"/> | H6   | blank       | Unknown     | Negative | 1.00  | 1.00       |        |
| <input checked="" type="checkbox"/> | H7   | blank       | Unknown     | Negative | 1.00  | 1.00       |        |
| <input checked="" type="checkbox"/> | H8   | blank       | Unknown     | Negative | 1.00  | 1.00       |        |
| <input checked="" type="checkbox"/> | H9   | blank       | Unknown     | Negative | 1.00  | 1.00       |        |
| <input checked="" type="checkbox"/> | H10  | blank       | Unknown     | Negative | 1.00  | 1.00       |        |
| <input checked="" type="checkbox"/> | H11  | blank       | Unknown     | Negative | 1.00  | 1.00       |        |
| <input checked="" type="checkbox"/> | H12  | blank       | Unknown     | Negative | 1.00  | 1.00       |        |

## Group 1

| Inc                                 | Pos | Sample Name | Sample Type | Score | Resolution | Status |
|-------------------------------------|-----|-------------|-------------|-------|------------|--------|
| <input checked="" type="checkbox"/> | A1  | GAPDH 1     | Unknown     | 0.98  | 0.39       |        |
| <input checked="" type="checkbox"/> | A2  | GAPDH 1     | Unknown     | 0.95  | 0.62       |        |
| <input checked="" type="checkbox"/> | A3  | GAPDH 1     | Unknown     | 0.98  | 0.41       |        |
| <input checked="" type="checkbox"/> | A4  | GAPDH 2     | Unknown     | 0.98  | 0.50       |        |
| <input checked="" type="checkbox"/> | A6  | GAPDH 2     | Unknown     | 0.93  | 0.66       |        |
| <input checked="" type="checkbox"/> | A7  | GAPDH 3     | Unknown     | 0.98  | 0.53       |        |
| <input checked="" type="checkbox"/> | A8  | GAPDH 3     | Unknown     | 0.91  | 0.22       |        |
| <input checked="" type="checkbox"/> | A9  | GAPDH 3     | Unknown     | 0.96  | 0.28       |        |



**Group 1**

| Inc                                 | Pos | Sample Name | Sample Type | Score | Resolution | Status |
|-------------------------------------|-----|-------------|-------------|-------|------------|--------|
| <input checked="" type="checkbox"/> | A10 | GAPDH 4     | Unknown     | 0.93  | 0.63       |        |
| <input checked="" type="checkbox"/> | A11 | GAPDH 4     | Unknown     | 0.94  | 0.58       |        |
| <input checked="" type="checkbox"/> | A12 | GAPDH 4     | Unknown     | 0.96  | 0.57       |        |
| <input checked="" type="checkbox"/> | B1  | FCER1A 1    | Unknown     | 0.98  | 0.82       |        |
| <input checked="" type="checkbox"/> | B3  | FCER1A 1    | Unknown     | 0.96  | 0.82       |        |
| <input checked="" type="checkbox"/> | B4  | FCER1A 2    | Unknown     | 0.96  | 0.77       |        |
| <input checked="" type="checkbox"/> | B6  | FCER1A 2    | Unknown     | 0.83  | 0.36       |        |
| <input checked="" type="checkbox"/> | B8  | FCER1A 3    | Unknown     | 0.79  | 0.38       |        |
| <input checked="" type="checkbox"/> | B12 | FCER1A 4    | Unknown     | 0.95  | 0.75       |        |
| <input checked="" type="checkbox"/> | D1  | GAPDH 4     | Unknown     | 0.95  | 0.67       |        |
| <input checked="" type="checkbox"/> | D2  | GAPDH 4     | Unknown     | 1.00  | 0.51       |        |
| <input checked="" type="checkbox"/> | D3  | GAPDH 4     | Unknown     | 0.96  | 0.61       |        |
| <input checked="" type="checkbox"/> | D4  | GAPDH 5     | Unknown     | 0.94  | 0.63       |        |
| <input checked="" type="checkbox"/> | D5  | GAPDH 5     | Unknown     | 0.94  | 0.65       |        |
| <input checked="" type="checkbox"/> | D6  | GAPDH 5     | Unknown     | 0.93  | 0.72       |        |
| <input checked="" type="checkbox"/> | D7  | GAPDH 6     | Unknown     | 0.93  | 0.69       |        |
| <input checked="" type="checkbox"/> | D8  | GAPDH 6     | Unknown     | 0.94  | 0.69       |        |
| <input checked="" type="checkbox"/> | D9  | GAPDH 6     | Unknown     | 0.98  | 0.52       |        |
| <input checked="" type="checkbox"/> | D10 | GAPDH 8     | Unknown     | 0.81  | 0.18       |        |
| <input checked="" type="checkbox"/> | D12 | GAPDH 8     | Unknown     | 0.97  | 0.56       |        |
| <input checked="" type="checkbox"/> | E1  | FCER1A 5    | Unknown     | 0.91  | 0.70       |        |
| <input checked="" type="checkbox"/> | E2  | FCER1A 5    | Unknown     | 0.98  | 0.84       |        |
| <input checked="" type="checkbox"/> | E3  | FCER1A 5    | Unknown     | 0.94  | 0.76       |        |
| <input checked="" type="checkbox"/> | E4  | FCER1A 6    | Unknown     | 0.73  | 0.30       |        |
| <input checked="" type="checkbox"/> | E5  | FCER1A 6    | Unknown     | 0.95  | 0.86       |        |
| <input checked="" type="checkbox"/> | E6  | FCER1A 6    | Unknown     | 0.73  | 0.15       |        |
| <input checked="" type="checkbox"/> | E7  | FCER1A 7    | Unknown     | 0.70  | 0.15       |        |
| <input checked="" type="checkbox"/> | E8  | FCER1A 7    | Unknown     | 0.75  | 0.19       |        |
| <input checked="" type="checkbox"/> | E9  | FCER1A 7    | Unknown     | 0.80  | 0.53       |        |
| <input checked="" type="checkbox"/> | E10 | FCER1A 8    | Unknown     | 0.88  | 0.61       |        |
| <input checked="" type="checkbox"/> | E11 | FCER1A 8    | Unknown     | 0.97  | 0.81       |        |
| <input checked="" type="checkbox"/> | E12 | FCER1A 8    | Unknown     | 0.90  | 0.65       |        |

**Group 2**

| Inc                                 | Pos | Sample Name | Sample Type | Score | Resolution | Status |
|-------------------------------------|-----|-------------|-------------|-------|------------|--------|
| <input checked="" type="checkbox"/> | C1  | RGS1 1      | Unknown     | 0.99  | 0.72       |        |
| <input checked="" type="checkbox"/> | C2  | RGS1 1      | Unknown     | 1.00  | 0.77       |        |
| <input checked="" type="checkbox"/> | C3  | RGS1 1      | Unknown     | 0.89  | 0.42       |        |

**Group 2**

| Inc                                 | Pos | Sample Name | Sample Type | Score | Resolution | Status |
|-------------------------------------|-----|-------------|-------------|-------|------------|--------|
| <input checked="" type="checkbox"/> | C4  | RGS1 2      | Unknown     | 0.99  | 0.75       |        |
| <input checked="" type="checkbox"/> | C5  | RGS1 2      | Unknown     | 0.99  | 0.74       |        |
| <input checked="" type="checkbox"/> | C6  | RGS1 2      | Unknown     | 0.98  | 0.78       |        |
| <input checked="" type="checkbox"/> | C7  | RGS1 3      | Unknown     | 0.97  | 0.84       |        |
| <input checked="" type="checkbox"/> | C8  | RGS1 3      | Unknown     | 0.99  | 0.77       |        |
| <input checked="" type="checkbox"/> | C9  | RGS1 3      | Unknown     | 0.88  | 0.49       |        |
| <input checked="" type="checkbox"/> | C10 | RGS1 4      | Unknown     | 0.97  | 0.82       |        |
| <input checked="" type="checkbox"/> | C11 | RGS1 4      | Unknown     | 0.97  | 0.80       |        |
| <input checked="" type="checkbox"/> | C12 | RGS1 4      | Unknown     | 0.98  | 0.80       |        |
| <input checked="" type="checkbox"/> | F2  | RGS1 5      | Unknown     | 0.78  | 0.33       |        |
| <input checked="" type="checkbox"/> | F4  | RGS1 6      | Unknown     | 0.94  | 0.72       |        |
| <input checked="" type="checkbox"/> | F5  | RGS1 6      | Unknown     | 0.99  | 0.78       |        |
| <input checked="" type="checkbox"/> | F6  | RGS1 6      | Unknown     | 0.98  | 0.81       |        |
| <input checked="" type="checkbox"/> | F7  | RGS1 7      | Unknown     | 0.98  | 0.83       |        |
| <input checked="" type="checkbox"/> | F8  | RGS1 7      | Unknown     | 0.97  | 0.75       |        |
| <input checked="" type="checkbox"/> | F9  | RGS1 7      | Unknown     | 0.99  | 0.76       |        |
| <input checked="" type="checkbox"/> | F10 | RGS1 8      | Unknown     | 0.95  | 0.62       |        |
| <input checked="" type="checkbox"/> | F11 | RGS1 8      | Unknown     | 0.99  | 0.76       |        |
| <input checked="" type="checkbox"/> | F12 | RGS1 8      | Unknown     | 0.99  | 0.73       |        |

**Group 3**

| Inc                                 | Pos | Sample Name | Sample Type | Score | Resolution | Status |
|-------------------------------------|-----|-------------|-------------|-------|------------|--------|
| <input checked="" type="checkbox"/> | A5  | GAPDH 2     | Unknown     | 1.00  | 0.51       |        |
| <input checked="" type="checkbox"/> | D11 | GAPDH 8     | Unknown     | 0.98  | 0.34       |        |

**Group Negative**

| Inc                                 | Pos | Sample Name | Sample Type | Score | Resolution | Status |
|-------------------------------------|-----|-------------|-------------|-------|------------|--------|
| <input checked="" type="checkbox"/> | G1  | blank       | Unknown     | 1.00  | 1.00       |        |
| <input checked="" type="checkbox"/> | G2  | blank       | Unknown     | 1.00  | 1.00       |        |
| <input checked="" type="checkbox"/> | G3  | blank       | Unknown     | 1.00  | 1.00       |        |
| <input checked="" type="checkbox"/> | G4  | blank       | Unknown     | 1.00  | 1.00       |        |
| <input checked="" type="checkbox"/> | G5  | blank       | Unknown     | 1.00  | 1.00       |        |
| <input checked="" type="checkbox"/> | G6  | blank       | Unknown     | 1.00  | 1.00       |        |
| <input checked="" type="checkbox"/> | G7  | blank       | Unknown     | 1.00  | 1.00       |        |
| <input checked="" type="checkbox"/> | G8  | blank       | Unknown     | 1.00  | 1.00       |        |
| <input checked="" type="checkbox"/> | G9  | blank       | Unknown     | 1.00  | 1.00       |        |
| <input checked="" type="checkbox"/> | G10 | blank       | Unknown     | 1.00  | 1.00       |        |
| <input checked="" type="checkbox"/> | G11 | blank       | Unknown     | 1.00  | 1.00       |        |

| Group                               |     | Negative    |             |       |            |        |
|-------------------------------------|-----|-------------|-------------|-------|------------|--------|
| Inc                                 | Pos | Sample Name | Sample Type | Score | Resolution | Status |
| <input checked="" type="checkbox"/> | G12 | blank       | Unknown     | 1.00  | 1.00       |        |
| <input checked="" type="checkbox"/> | H1  | blank       | Unknown     | 1.00  | 1.00       |        |
| <input checked="" type="checkbox"/> | H2  | blank       | Unknown     | 1.00  | 1.00       |        |
| <input checked="" type="checkbox"/> | H3  | blank       | Unknown     | 1.00  | 1.00       |        |
| <input checked="" type="checkbox"/> | H4  | blank       | Unknown     | 1.00  | 1.00       |        |
| <input checked="" type="checkbox"/> | H5  | blank       | Unknown     | 1.00  | 1.00       |        |
| <input checked="" type="checkbox"/> | H6  | blank       | Unknown     | 1.00  | 1.00       |        |
| <input checked="" type="checkbox"/> | H7  | blank       | Unknown     | 1.00  | 1.00       |        |
| <input checked="" type="checkbox"/> | H8  | blank       | Unknown     | 1.00  | 1.00       |        |
| <input checked="" type="checkbox"/> | H9  | blank       | Unknown     | 1.00  | 1.00       |        |
| <input checked="" type="checkbox"/> | H10 | blank       | Unknown     | 1.00  | 1.00       |        |
| <input checked="" type="checkbox"/> | H11 | blank       | Unknown     | 1.00  | 1.00       |        |
| <input checked="" type="checkbox"/> | H12 | blank       | Unknown     | 1.00  | 1.00       |        |

| Group                               |     | Unknown     |             |       |            |        |
|-------------------------------------|-----|-------------|-------------|-------|------------|--------|
| Inc                                 | Pos | Sample Name | Sample Type | Score | Resolution | Status |
| <input checked="" type="checkbox"/> | B2  | FCER1A 1    | Unknown     | 0.63  | 0.07       |        |
| <input checked="" type="checkbox"/> | B5  | FCER1A 2    | Unknown     | 0.67  | 0.05       |        |
| <input checked="" type="checkbox"/> | B7  | FCER1A 3    | Unknown     | 0.67  | 0.05       |        |
| <input checked="" type="checkbox"/> | B9  | FCER1A 3    | Unknown     | 0.65  | 0.09       |        |
| <input checked="" type="checkbox"/> | B10 | FCER1A 4    | Unknown     | 0.62  |            |        |
| <input checked="" type="checkbox"/> | B11 | FCER1A 4    | Unknown     | 0.73  | 0.08       |        |
| <input checked="" type="checkbox"/> | F1  | RGS1 5      | Unknown     | 0.58  | 0.05       |        |
| <input checked="" type="checkbox"/> | F3  | RGS1 5      | Unknown     | 0.66  | 0.09       |        |

### Melting Curves



### Melting Peaks

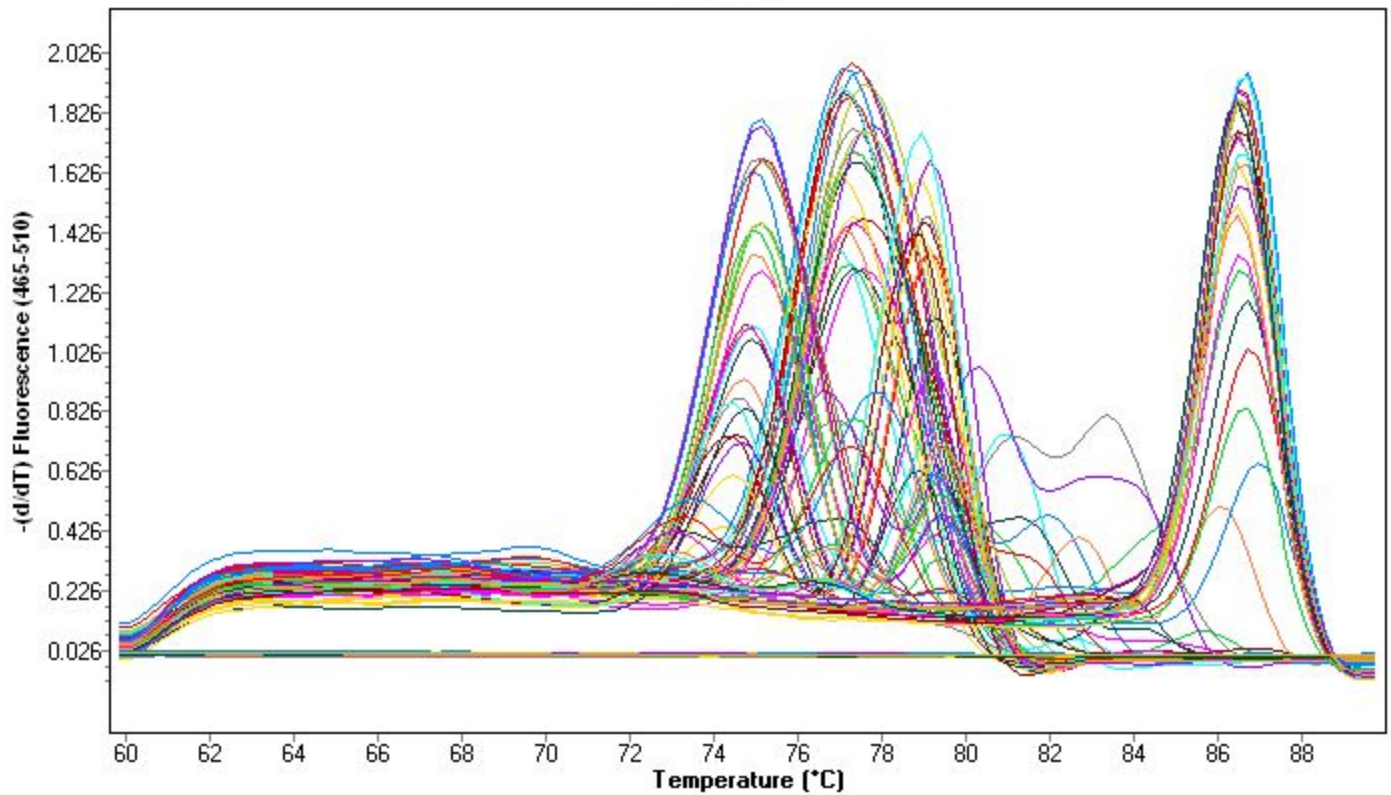

### Analysis Notes

## Tm Calling for All Samples (1) (Tm Calling)

### Settings

|                |             |                    |          |
|----------------|-------------|--------------------|----------|
| Channel        | 465-510     | Color Compensation | Off      |
| Program        | Program     |                    |          |
| Show Shoulders | False       | Chemistry          | HybProbe |
|                |             | Max Peaks          | 2        |
| Subset Name    | All Samples |                    |          |

### Results

| Inc                                 | Pos | Sample Name | Peak 1 |      |       |        | Peak 2 |      |       |        | Status |
|-------------------------------------|-----|-------------|--------|------|-------|--------|--------|------|-------|--------|--------|
|                                     |     |             | Tm     | Area | Width | Height | Tm     | Area | Width | Height |        |
| <input checked="" type="checkbox"/> | A1  | GAPDH 1     | 77.73  | 6.39 | 3.19  | 2.00   | 82.00  | 1.42 | 2.85  | 0.50   |        |
| <input checked="" type="checkbox"/> | A2  | GAPDH 1     | 77.66  | 6.91 | 3.37  | 2.05   |        |      |       |        |        |
| <input checked="" type="checkbox"/> | A3  | GAPDH 1     | 77.31  | 3.77 | 2.83  | 1.33   |        |      |       |        |        |
| <input checked="" type="checkbox"/> | A4  | GAPDH 2     | 77.83  | 4.09 | 3.30  | 1.24   |        |      |       |        |        |
| <input checked="" type="checkbox"/> | A5  | GAPDH 2     | 76.92  | 1.27 | 1.81  | 0.70   | 82.86  | 5.02 | 5.79  | 0.87   |        |
| <input checked="" type="checkbox"/> | A6  | GAPDH 2     | 77.48  | 4.78 | 3.15  | 1.51   |        |      |       |        |        |
| <input checked="" type="checkbox"/> | A7  | GAPDH 3     | 77.97  | 5.32 | 3.58  | 1.49   |        |      |       |        |        |
| <input checked="" type="checkbox"/> | A8  | GAPDH 3     | 76.99  | 4.02 | 2.86  | 1.40   | 80.99  | 2.05 | 2.41  | 0.85   |        |
| <input checked="" type="checkbox"/> | A9  | GAPDH 3     | 77.55  | 3.73 | 2.93  | 1.27   | 81.10  | 1.32 | 3.14  | 0.42   |        |
| <input checked="" type="checkbox"/> | A10 | GAPDH 4     | 77.66  | 5.60 | 3.23  | 1.74   |        |      |       |        |        |
| <input checked="" type="checkbox"/> | A11 | GAPDH 4     | 77.97  | 6.07 | 3.29  | 1.84   |        |      |       |        |        |
| <input checked="" type="checkbox"/> | A12 | GAPDH 4     | 77.97  | 6.90 | 3.49  | 1.98   |        |      |       |        |        |
| <input checked="" type="checkbox"/> | B1  | FCER1A 1    | 75.22  | 6.43 | 3.84  | 1.67   |        |      |       |        |        |
| <input checked="" type="checkbox"/> | B2  | FCER1A 1    | 74.78  | 2.15 | 2.18  | 0.99   | 79.19  | 3.19 | 2.24  | 1.42   |        |
| <input checked="" type="checkbox"/> | B3  | FCER1A 1    | 75.22  | 4.96 | 3.59  | 1.38   |        |      |       |        |        |
| <input checked="" type="checkbox"/> | B4  | FCER1A 2    | 75.29  | 3.82 | 2.91  | 1.31   | 79.44  | 1.11 | 2.52  | 0.44   |        |
| <input checked="" type="checkbox"/> | B5  | FCER1A 2    | 74.58  | 1.66 | 2.27  | 0.73   | 79.07  | 3.73 | 2.42  | 1.54   |        |
| <input checked="" type="checkbox"/> | B6  | FCER1A 2    | 74.12  | 0.56 | 1.89  | 0.30   | 78.89  | 4.03 | 2.41  | 1.67   |        |
| <input checked="" type="checkbox"/> | B7  | FCER1A 3    | 74.49  | 1.23 | 2.00  | 0.62   | 79.05  | 3.56 | 2.34  | 1.52   |        |
| <input checked="" type="checkbox"/> | B8  | FCER1A 3    | 74.98  | 2.91 | 2.58  | 1.13   | 79.30  | 2.04 | 2.41  | 0.85   |        |
| <input checked="" type="checkbox"/> | B9  | FCER1A 3    | 74.92  | 2.14 | 2.22  | 0.96   | 79.35  | 2.69 | 2.28  | 1.18   |        |
| <input checked="" type="checkbox"/> | B10 | FCER1A 4    | 74.69  | 1.69 | 2.06  | 0.82   | 79.19  | 3.29 | 2.31  | 1.43   |        |
| <input checked="" type="checkbox"/> | B11 | FCER1A 4    | 74.59  | 1.05 | 1.85  | 0.56   | 79.20  | 4.05 | 2.34  | 1.73   |        |
| <input checked="" type="checkbox"/> | B12 | FCER1A 4    | 75.33  | 4.79 | 2.83  | 1.69   | 79.62  | 1.52 | 2.24  | 0.68   |        |
| <input checked="" type="checkbox"/> | C1  | RGS1 1      |        |      |       |        |        |      |       |        |        |
| <input checked="" type="checkbox"/> | C2  | RGS1 1      | 86.60  | 4.63 | 2.31  | 2.01   |        |      |       |        |        |
| <input checked="" type="checkbox"/> | C3  | RGS1 1      | 76.71  | 0.23 | 1.04  | 0.22   | 86.64  | 3.90 | 2.79  | 1.40   |        |
| <input checked="" type="checkbox"/> | C4  | RGS1 2      | 86.55  | 4.37 | 2.39  | 1.83   |        |      |       |        |        |
| <input checked="" type="checkbox"/> | C5  | RGS1 2      | 86.51  | 4.73 | 2.41  | 1.96   |        |      |       |        |        |

## Results

| Inc                                 | Pos | Sample Name | Peak 1 |      |       |        | Peak 2 |      |       |        | Status |
|-------------------------------------|-----|-------------|--------|------|-------|--------|--------|------|-------|--------|--------|
|                                     |     |             | Tm     | Area | Width | Height | Tm     | Area | Width | Height |        |
| <input checked="" type="checkbox"/> | C6  | RGS1 2      | 86.51  | 4.40 | 2.55  | 1.73   |        |      |       |        |        |
| <input checked="" type="checkbox"/> | C7  | RGS1 3      | 86.56  | 4.78 | 2.41  | 1.98   |        |      |       |        |        |
| <input checked="" type="checkbox"/> | C8  | RGS1 3      | 86.70  | 4.88 | 2.32  | 2.10   |        |      |       |        |        |
| <input checked="" type="checkbox"/> | C9  | RGS1 3      | 75.35  | 1.44 | 4.99  | 0.29   |        |      |       |        |        |
| <input checked="" type="checkbox"/> | C10 | RGS1 4      | 86.67  | 4.16 | 2.38  | 1.75   |        |      |       |        |        |
| <input checked="" type="checkbox"/> | C11 | RGS1 4      | 86.65  | 4.47 | 2.62  | 1.71   |        |      |       |        |        |
| <input checked="" type="checkbox"/> | C12 | RGS1 4      | 86.66  | 4.59 | 2.33  | 1.97   |        |      |       |        |        |
| <input checked="" type="checkbox"/> | D1  | GAPDH 4     | 77.36  | 6.83 | 3.38  | 2.02   |        |      |       |        |        |
| <input checked="" type="checkbox"/> | D2  | GAPDH 4     | 77.57  | 6.49 | 3.69  | 1.76   |        |      |       |        |        |
| <input checked="" type="checkbox"/> | D3  | GAPDH 4     | 77.73  | 5.99 | 3.48  | 1.72   |        |      |       |        |        |
| <input checked="" type="checkbox"/> | D4  | GAPDH 5     | 77.59  | 4.85 | 3.26  | 1.49   |        |      |       |        |        |
| <input checked="" type="checkbox"/> | D5  | GAPDH 5     | 77.59  | 6.10 | 3.35  | 1.82   |        |      |       |        |        |
| <input checked="" type="checkbox"/> | D6  | GAPDH 5     | 77.13  | 5.48 | 3.25  | 1.68   |        |      |       |        |        |
| <input checked="" type="checkbox"/> | D7  | GAPDH 6     | 77.30  | 5.98 | 3.09  | 1.94   |        |      |       |        |        |
| <input checked="" type="checkbox"/> | D8  | GAPDH 6     | 77.28  | 6.25 | 3.21  | 1.95   |        |      |       |        |        |
| <input checked="" type="checkbox"/> | D9  | GAPDH 6     | 77.68  | 5.56 | 3.38  | 1.65   |        |      |       |        |        |
| <input checked="" type="checkbox"/> | D10 | GAPDH 8     | 77.27  | 2.63 | 1.70  | 1.55   | 86.62  | 4.88 | 10.47 | 0.47   |        |
| <input checked="" type="checkbox"/> | D11 | GAPDH 8     | 76.49  | 1.04 | 1.08  | 0.96   | 81.92  | 7.05 | 7.36  | 0.96   |        |
| <input checked="" type="checkbox"/> | D12 | GAPDH 8     | 78.03  | 6.61 | 3.67  | 1.80   |        |      |       |        |        |
| <input checked="" type="checkbox"/> | E1  | FCER1A 5    | 75.04  | 4.30 | 2.58  | 1.67   | 79.34  | 1.51 | 2.22  | 0.68   |        |
| <input checked="" type="checkbox"/> | E2  | FCER1A 5    | 75.35  | 5.91 | 3.67  | 1.61   |        |      |       |        |        |
| <input checked="" type="checkbox"/> | E3  | FCER1A 5    | 75.08  | 3.99 | 2.72  | 1.47   | 79.37  | 1.33 | 2.21  | 0.60   |        |
| <input checked="" type="checkbox"/> | E4  | FCER1A 6    | 74.89  | 2.75 | 2.42  | 1.13   | 79.27  | 2.53 | 2.29  | 1.10   |        |
| <input checked="" type="checkbox"/> | E5  | FCER1A 6    | 75.37  | 5.91 | 3.55  | 1.67   |        |      |       |        |        |
| <input checked="" type="checkbox"/> | E6  | FCER1A 6    | 74.39  | 0.93 | 1.91  | 0.49   | 78.97  | 3.39 | 2.32  | 1.46   |        |
| <input checked="" type="checkbox"/> | E7  | FCER1A 7    | 74.29  | 1.30 | 2.07  | 0.63   | 78.80  | 3.41 | 2.31  | 1.47   |        |
| <input checked="" type="checkbox"/> | E8  | FCER1A 7    | 74.36  | 1.46 | 1.99  | 0.73   | 78.90  | 4.29 | 2.36  | 1.82   |        |
| <input checked="" type="checkbox"/> | E9  | FCER1A 7    | 74.77  | 1.98 | 2.31  | 0.86   | 78.86  | 1.58 | 2.19  | 0.72   |        |
| <input checked="" type="checkbox"/> | E10 | FCER1A 8    | 75.11  | 3.53 | 2.56  | 1.38   | 79.44  | 1.78 | 2.25  | 0.79   |        |
| <input checked="" type="checkbox"/> | E11 | FCER1A 8    | 75.28  | 5.35 | 2.95  | 1.81   | 79.53  | 1.14 | 2.21  | 0.52   |        |
| <input checked="" type="checkbox"/> | E12 | FCER1A 8    | 75.22  | 4.00 | 2.68  | 1.49   | 79.56  | 1.78 | 2.29  | 0.78   |        |
| <input checked="" type="checkbox"/> | F1  | RGS1 5      | 73.53  | 0.68 | 2.60  | 0.26   | 77.76  | 1.49 | 2.16  | 0.69   |        |
| <input checked="" type="checkbox"/> | F2  | RGS1 5      | 76.53  | 1.43 | 3.85  | 0.37   |        |      |       |        |        |
| <input checked="" type="checkbox"/> | F3  | RGS1 5      | 77.39  | 1.10 | 1.53  | 0.72   |        |      |       |        |        |
| <input checked="" type="checkbox"/> | F4  | RGS1 6      | 86.61  | 3.73 | 2.60  | 1.44   |        |      |       |        |        |
| <input checked="" type="checkbox"/> | F5  | RGS1 6      | 86.51  | 4.22 | 2.28  | 1.85   |        |      |       |        |        |

## Results

| Inc                                 | Pos | Sample Name | Peak 1 |      |       |        | Peak 2 |      |       |        | Status |
|-------------------------------------|-----|-------------|--------|------|-------|--------|--------|------|-------|--------|--------|
|                                     |     |             | Tm     | Area | Width | Height | Tm     | Area | Width | Height |        |
| <input checked="" type="checkbox"/> | F6  | RGS1 6      | 86.50  | 4.02 | 2.49  | 1.62   |        |      |       |        |        |
| <input checked="" type="checkbox"/> | F7  | RGS1 7      | 86.61  | 4.96 | 2.62  | 1.89   |        |      |       |        |        |
| <input checked="" type="checkbox"/> | F8  | RGS1 7      | 86.62  | 4.48 | 2.49  | 1.80   |        |      |       |        |        |
| <input checked="" type="checkbox"/> | F9  | RGS1 7      | 86.49  | 4.91 | 2.47  | 1.98   |        |      |       |        |        |
| <input checked="" type="checkbox"/> | F10 | RGS1 8      | 86.56  | 4.27 | 2.66  | 1.61   |        |      |       |        |        |
| <input checked="" type="checkbox"/> | F11 | RGS1 8      | 86.62  | 4.95 | 2.48  | 1.99   |        |      |       |        |        |
| <input checked="" type="checkbox"/> | F12 | RGS1 8      | 86.63  | 4.79 | 2.43  | 1.97   |        |      |       |        |        |
| <input checked="" type="checkbox"/> | G1  | blank       |        |      |       |        |        |      |       |        |        |
| <input checked="" type="checkbox"/> | G2  | blank       |        |      |       |        |        |      |       |        |        |
| <input checked="" type="checkbox"/> | G3  | blank       |        |      |       |        |        |      |       |        |        |
| <input checked="" type="checkbox"/> | G4  | blank       |        |      |       |        |        |      |       |        |        |
| <input checked="" type="checkbox"/> | G5  | blank       |        |      |       |        |        |      |       |        |        |
| <input checked="" type="checkbox"/> | G6  | blank       |        |      |       |        |        |      |       |        |        |
| <input checked="" type="checkbox"/> | G7  | blank       |        |      |       |        |        |      |       |        |        |
| <input checked="" type="checkbox"/> | G8  | blank       |        |      |       |        |        |      |       |        |        |
| <input checked="" type="checkbox"/> | G9  | blank       |        |      |       |        |        |      |       |        |        |
| <input checked="" type="checkbox"/> | G10 | blank       |        |      |       |        |        |      |       |        |        |
| <input checked="" type="checkbox"/> | G11 | blank       |        |      |       |        |        |      |       |        |        |
| <input checked="" type="checkbox"/> | G12 | blank       |        |      |       |        |        |      |       |        |        |
| <input checked="" type="checkbox"/> | H1  | blank       |        |      |       |        |        |      |       |        |        |
| <input checked="" type="checkbox"/> | H2  | blank       |        |      |       |        |        |      |       |        |        |
| <input checked="" type="checkbox"/> | H3  | blank       |        |      |       |        |        |      |       |        |        |
| <input checked="" type="checkbox"/> | H4  | blank       |        |      |       |        |        |      |       |        |        |
| <input checked="" type="checkbox"/> | H5  | blank       |        |      |       |        |        |      |       |        |        |
| <input checked="" type="checkbox"/> | H6  | blank       |        |      |       |        |        |      |       |        |        |
| <input checked="" type="checkbox"/> | H7  | blank       |        |      |       |        |        |      |       |        |        |
| <input checked="" type="checkbox"/> | H8  | blank       |        |      |       |        |        |      |       |        |        |
| <input checked="" type="checkbox"/> | H9  | blank       |        |      |       |        |        |      |       |        |        |
| <input checked="" type="checkbox"/> | H10 | blank       |        |      |       |        |        |      |       |        |        |
| <input checked="" type="checkbox"/> | H11 | blank       |        |      |       |        |        |      |       |        |        |
| <input checked="" type="checkbox"/> | H12 | blank       |        |      |       |        |        |      |       |        |        |

### Melting Curves



### Melting Peaks



### Analysis Notes



## Tm Calling for All Samples (2) (Tm Calling)

### Settings

|                |             |                    |          |
|----------------|-------------|--------------------|----------|
| Channel        | 465-510     | Color Compensation | Off      |
| Program        | Program     |                    |          |
| Show Shoulders | False       | Chemistry          | HybProbe |
|                |             | Max Peaks          | 2        |
| Subset Name    | All Samples |                    |          |

### Results

| Inc                                 | Pos | Sample Name | Peak 1 |      |       |        | Peak 2 |      |       |        | Status |
|-------------------------------------|-----|-------------|--------|------|-------|--------|--------|------|-------|--------|--------|
|                                     |     |             | Tm     | Area | Width | Height | Tm     | Area | Width | Height |        |
| <input checked="" type="checkbox"/> | A1  | GAPDH 1     | 77.73  | 6.39 | 3.19  | 2.00   | 82.00  | 1.42 | 2.85  | 0.50   |        |
| <input checked="" type="checkbox"/> | A2  | GAPDH 1     | 77.66  | 6.91 | 3.37  | 2.05   |        |      |       |        |        |
| <input checked="" type="checkbox"/> | A3  | GAPDH 1     | 77.31  | 3.77 | 2.83  | 1.33   |        |      |       |        |        |
| <input checked="" type="checkbox"/> | A4  | GAPDH 2     | 77.83  | 4.09 | 3.30  | 1.24   |        |      |       |        |        |
| <input checked="" type="checkbox"/> | A5  | GAPDH 2     | 76.92  | 1.27 | 1.81  | 0.70   | 82.86  | 5.02 | 5.79  | 0.87   |        |
| <input checked="" type="checkbox"/> | A6  | GAPDH 2     | 77.48  | 4.78 | 3.15  | 1.51   |        |      |       |        |        |
| <input checked="" type="checkbox"/> | A7  | GAPDH 3     | 77.97  | 5.32 | 3.58  | 1.49   |        |      |       |        |        |
| <input checked="" type="checkbox"/> | A8  | GAPDH 3     | 76.99  | 4.02 | 2.86  | 1.40   | 80.99  | 2.05 | 2.41  | 0.85   |        |
| <input checked="" type="checkbox"/> | A9  | GAPDH 3     | 77.55  | 3.73 | 2.93  | 1.27   | 81.10  | 1.32 | 3.14  | 0.42   |        |
| <input checked="" type="checkbox"/> | A10 | GAPDH 4     | 77.66  | 5.60 | 3.23  | 1.74   |        |      |       |        |        |
| <input checked="" type="checkbox"/> | A11 | GAPDH 4     | 77.97  | 6.07 | 3.29  | 1.84   |        |      |       |        |        |
| <input checked="" type="checkbox"/> | A12 | GAPDH 4     | 77.97  | 6.90 | 3.49  | 1.98   |        |      |       |        |        |
| <input checked="" type="checkbox"/> | B1  | FCER1A 1    | 75.22  | 6.43 | 3.84  | 1.67   |        |      |       |        |        |
| <input checked="" type="checkbox"/> | B2  | FCER1A 1    | 74.78  | 2.15 | 2.18  | 0.99   | 79.19  | 3.19 | 2.24  | 1.42   |        |
| <input checked="" type="checkbox"/> | B3  | FCER1A 1    | 75.22  | 4.96 | 3.59  | 1.38   |        |      |       |        |        |
| <input checked="" type="checkbox"/> | B4  | FCER1A 2    | 75.29  | 3.82 | 2.91  | 1.31   | 79.44  | 1.11 | 2.52  | 0.44   |        |
| <input checked="" type="checkbox"/> | B5  | FCER1A 2    | 74.58  | 1.66 | 2.27  | 0.73   | 79.07  | 3.73 | 2.42  | 1.54   |        |
| <input checked="" type="checkbox"/> | B6  | FCER1A 2    | 74.12  | 0.56 | 1.89  | 0.30   | 78.89  | 4.03 | 2.41  | 1.67   |        |
| <input checked="" type="checkbox"/> | B7  | FCER1A 3    | 74.49  | 1.23 | 2.00  | 0.62   | 79.05  | 3.56 | 2.34  | 1.52   |        |
| <input checked="" type="checkbox"/> | B8  | FCER1A 3    | 74.98  | 2.91 | 2.58  | 1.13   | 79.30  | 2.04 | 2.41  | 0.85   |        |
| <input checked="" type="checkbox"/> | B9  | FCER1A 3    | 74.92  | 2.14 | 2.22  | 0.96   | 79.35  | 2.69 | 2.28  | 1.18   |        |
| <input checked="" type="checkbox"/> | B10 | FCER1A 4    | 74.69  | 1.69 | 2.06  | 0.82   | 79.19  | 3.29 | 2.31  | 1.43   |        |
| <input checked="" type="checkbox"/> | B11 | FCER1A 4    | 74.59  | 1.05 | 1.85  | 0.56   | 79.20  | 4.05 | 2.34  | 1.73   |        |
| <input checked="" type="checkbox"/> | B12 | FCER1A 4    | 75.33  | 4.79 | 2.83  | 1.69   | 79.62  | 1.52 | 2.24  | 0.68   |        |
| <input checked="" type="checkbox"/> | C1  | RGS1 1      |        |      |       |        |        |      |       |        |        |
| <input checked="" type="checkbox"/> | C2  | RGS1 1      | 86.60  | 4.63 | 2.31  | 2.01   |        |      |       |        |        |
| <input checked="" type="checkbox"/> | C3  | RGS1 1      | 76.71  | 0.23 | 1.04  | 0.22   | 86.64  | 3.90 | 2.79  | 1.40   |        |
| <input checked="" type="checkbox"/> | C4  | RGS1 2      | 86.55  | 4.37 | 2.39  | 1.83   |        |      |       |        |        |
| <input checked="" type="checkbox"/> | C5  | RGS1 2      | 86.51  | 4.73 | 2.41  | 1.96   |        |      |       |        |        |

## Results

| Inc                                 | Pos | Sample Name | Peak 1 |      |       |        | Peak 2 |      |       |        | Status |
|-------------------------------------|-----|-------------|--------|------|-------|--------|--------|------|-------|--------|--------|
|                                     |     |             | Tm     | Area | Width | Height | Tm     | Area | Width | Height |        |
| <input checked="" type="checkbox"/> | C6  | RGS1 2      | 86.51  | 4.40 | 2.55  | 1.73   |        |      |       |        |        |
| <input checked="" type="checkbox"/> | C7  | RGS1 3      | 86.56  | 4.78 | 2.41  | 1.98   |        |      |       |        |        |
| <input checked="" type="checkbox"/> | C8  | RGS1 3      | 86.70  | 4.88 | 2.32  | 2.10   |        |      |       |        |        |
| <input checked="" type="checkbox"/> | C9  | RGS1 3      | 75.35  | 1.44 | 4.99  | 0.29   |        |      |       |        |        |
| <input checked="" type="checkbox"/> | C10 | RGS1 4      | 86.67  | 4.16 | 2.38  | 1.75   |        |      |       |        |        |
| <input checked="" type="checkbox"/> | C11 | RGS1 4      | 86.65  | 4.47 | 2.62  | 1.71   |        |      |       |        |        |
| <input checked="" type="checkbox"/> | C12 | RGS1 4      | 86.66  | 4.59 | 2.33  | 1.97   |        |      |       |        |        |
| <input checked="" type="checkbox"/> | D1  | GAPDH 4     | 77.36  | 6.83 | 3.38  | 2.02   |        |      |       |        |        |
| <input checked="" type="checkbox"/> | D2  | GAPDH 4     | 77.57  | 6.49 | 3.69  | 1.76   |        |      |       |        |        |
| <input checked="" type="checkbox"/> | D3  | GAPDH 4     | 77.73  | 5.99 | 3.48  | 1.72   |        |      |       |        |        |
| <input checked="" type="checkbox"/> | D4  | GAPDH 5     | 77.59  | 4.85 | 3.26  | 1.49   |        |      |       |        |        |
| <input checked="" type="checkbox"/> | D5  | GAPDH 5     | 77.59  | 6.10 | 3.35  | 1.82   |        |      |       |        |        |
| <input checked="" type="checkbox"/> | D6  | GAPDH 5     | 77.13  | 5.48 | 3.25  | 1.68   |        |      |       |        |        |
| <input checked="" type="checkbox"/> | D7  | GAPDH 6     | 77.30  | 5.98 | 3.09  | 1.94   |        |      |       |        |        |
| <input checked="" type="checkbox"/> | D8  | GAPDH 6     | 77.28  | 6.25 | 3.21  | 1.95   |        |      |       |        |        |
| <input checked="" type="checkbox"/> | D9  | GAPDH 6     | 77.68  | 5.56 | 3.38  | 1.65   |        |      |       |        |        |
| <input checked="" type="checkbox"/> | D10 | GAPDH 8     | 77.27  | 2.63 | 1.70  | 1.55   | 86.62  | 4.88 | 10.47 | 0.47   |        |
| <input checked="" type="checkbox"/> | D11 | GAPDH 8     | 76.49  | 1.04 | 1.08  | 0.96   | 81.92  | 7.05 | 7.36  | 0.96   |        |
| <input checked="" type="checkbox"/> | D12 | GAPDH 8     | 78.03  | 6.61 | 3.67  | 1.80   |        |      |       |        |        |
| <input checked="" type="checkbox"/> | E1  | FCER1A 5    | 75.04  | 4.30 | 2.58  | 1.67   | 79.34  | 1.51 | 2.22  | 0.68   |        |
| <input checked="" type="checkbox"/> | E2  | FCER1A 5    | 75.35  | 5.91 | 3.67  | 1.61   |        |      |       |        |        |
| <input checked="" type="checkbox"/> | E3  | FCER1A 5    | 75.08  | 3.99 | 2.72  | 1.47   | 79.37  | 1.33 | 2.21  | 0.60   |        |
| <input checked="" type="checkbox"/> | E4  | FCER1A 6    | 74.89  | 2.75 | 2.42  | 1.13   | 79.27  | 2.53 | 2.29  | 1.10   |        |
| <input checked="" type="checkbox"/> | E5  | FCER1A 6    | 75.37  | 5.91 | 3.55  | 1.67   |        |      |       |        |        |
| <input checked="" type="checkbox"/> | E6  | FCER1A 6    | 74.39  | 0.93 | 1.91  | 0.49   | 78.97  | 3.39 | 2.32  | 1.46   |        |
| <input checked="" type="checkbox"/> | E7  | FCER1A 7    | 74.29  | 1.30 | 2.07  | 0.63   | 78.80  | 3.41 | 2.31  | 1.47   |        |
| <input checked="" type="checkbox"/> | E8  | FCER1A 7    | 74.36  | 1.46 | 1.99  | 0.73   | 78.90  | 4.29 | 2.36  | 1.82   |        |
| <input checked="" type="checkbox"/> | E9  | FCER1A 7    | 74.77  | 1.98 | 2.31  | 0.86   | 78.86  | 1.58 | 2.19  | 0.72   |        |
| <input checked="" type="checkbox"/> | E10 | FCER1A 8    | 75.11  | 3.53 | 2.56  | 1.38   | 79.44  | 1.78 | 2.25  | 0.79   |        |
| <input checked="" type="checkbox"/> | E11 | FCER1A 8    | 75.28  | 5.35 | 2.95  | 1.81   | 79.53  | 1.14 | 2.21  | 0.52   |        |
| <input checked="" type="checkbox"/> | E12 | FCER1A 8    | 75.22  | 4.00 | 2.68  | 1.49   | 79.56  | 1.78 | 2.29  | 0.78   |        |
| <input checked="" type="checkbox"/> | F1  | RGS1 5      | 73.53  | 0.68 | 2.60  | 0.26   | 77.76  | 1.49 | 2.16  | 0.69   |        |
| <input checked="" type="checkbox"/> | F2  | RGS1 5      | 76.53  | 1.43 | 3.85  | 0.37   |        |      |       |        |        |
| <input checked="" type="checkbox"/> | F3  | RGS1 5      | 77.39  | 1.10 | 1.53  | 0.72   |        |      |       |        |        |
| <input checked="" type="checkbox"/> | F4  | RGS1 6      | 86.61  | 3.73 | 2.60  | 1.44   |        |      |       |        |        |
| <input checked="" type="checkbox"/> | F5  | RGS1 6      | 86.51  | 4.22 | 2.28  | 1.85   |        |      |       |        |        |

## Results

| Inc                                 | Pos | Sample Name | Peak 1 |      |       |        | Peak 2 |      |       |        | Status |
|-------------------------------------|-----|-------------|--------|------|-------|--------|--------|------|-------|--------|--------|
|                                     |     |             | Tm     | Area | Width | Height | Tm     | Area | Width | Height |        |
| <input checked="" type="checkbox"/> | F6  | RGS1 6      | 86.50  | 4.02 | 2.49  | 1.62   |        |      |       |        |        |
| <input checked="" type="checkbox"/> | F7  | RGS1 7      | 86.61  | 4.96 | 2.62  | 1.89   |        |      |       |        |        |
| <input checked="" type="checkbox"/> | F8  | RGS1 7      | 86.62  | 4.48 | 2.49  | 1.80   |        |      |       |        |        |
| <input checked="" type="checkbox"/> | F9  | RGS1 7      | 86.49  | 4.91 | 2.47  | 1.98   |        |      |       |        |        |
| <input checked="" type="checkbox"/> | F10 | RGS1 8      | 86.56  | 4.27 | 2.66  | 1.61   |        |      |       |        |        |
| <input checked="" type="checkbox"/> | F11 | RGS1 8      | 86.62  | 4.95 | 2.48  | 1.99   |        |      |       |        |        |
| <input checked="" type="checkbox"/> | F12 | RGS1 8      | 86.63  | 4.79 | 2.43  | 1.97   |        |      |       |        |        |
| <input checked="" type="checkbox"/> | G1  | blank       |        |      |       |        |        |      |       |        |        |
| <input checked="" type="checkbox"/> | G2  | blank       |        |      |       |        |        |      |       |        |        |
| <input checked="" type="checkbox"/> | G3  | blank       |        |      |       |        |        |      |       |        |        |
| <input checked="" type="checkbox"/> | G4  | blank       |        |      |       |        |        |      |       |        |        |
| <input checked="" type="checkbox"/> | G5  | blank       |        |      |       |        |        |      |       |        |        |
| <input checked="" type="checkbox"/> | G6  | blank       |        |      |       |        |        |      |       |        |        |
| <input checked="" type="checkbox"/> | G7  | blank       |        |      |       |        |        |      |       |        |        |
| <input checked="" type="checkbox"/> | G8  | blank       |        |      |       |        |        |      |       |        |        |
| <input checked="" type="checkbox"/> | G9  | blank       |        |      |       |        |        |      |       |        |        |
| <input checked="" type="checkbox"/> | G10 | blank       |        |      |       |        |        |      |       |        |        |
| <input checked="" type="checkbox"/> | G11 | blank       |        |      |       |        |        |      |       |        |        |
| <input checked="" type="checkbox"/> | G12 | blank       |        |      |       |        |        |      |       |        |        |
| <input checked="" type="checkbox"/> | H1  | blank       |        |      |       |        |        |      |       |        |        |
| <input checked="" type="checkbox"/> | H2  | blank       |        |      |       |        |        |      |       |        |        |
| <input checked="" type="checkbox"/> | H3  | blank       |        |      |       |        |        |      |       |        |        |
| <input checked="" type="checkbox"/> | H4  | blank       |        |      |       |        |        |      |       |        |        |
| <input checked="" type="checkbox"/> | H5  | blank       |        |      |       |        |        |      |       |        |        |
| <input checked="" type="checkbox"/> | H6  | blank       |        |      |       |        |        |      |       |        |        |
| <input checked="" type="checkbox"/> | H7  | blank       |        |      |       |        |        |      |       |        |        |
| <input checked="" type="checkbox"/> | H8  | blank       |        |      |       |        |        |      |       |        |        |
| <input checked="" type="checkbox"/> | H9  | blank       |        |      |       |        |        |      |       |        |        |
| <input checked="" type="checkbox"/> | H10 | blank       |        |      |       |        |        |      |       |        |        |
| <input checked="" type="checkbox"/> | H11 | blank       |        |      |       |        |        |      |       |        |        |
| <input checked="" type="checkbox"/> | H12 | blank       |        |      |       |        |        |      |       |        |        |

### Melting Curves



### Melting Peaks



### Analysis Notes
