# Supplementary material for: Exploring differential gene expression and biomarker potential in systemic lupus erythematosus: a retrospective study
Source: PeerJ journal article supplement (doi:10.7717/peerj.19891), 2025-09-08
Supplement: qPCR_RAW_data.zip [file qPCR_RAW_data.zip]

# cobas® 4800 User Defined Workflow (UDF)

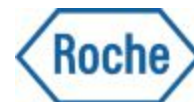

**xj20250528 HC2**

## Experiment

|               |                      |                    |                                    |
|---------------|----------------------|--------------------|------------------------------------|
| Creation Date | 5/28/2025 1:43:02 PM | Last Modified Date | 6/2/2025 2:35:48 AM                |
| Operator      | System Admin         | Owner              | System Admin                       |
| Start Time    | 5/28/2025 1:44:03 PM | End Time           | 5/28/2025 2:43:34 PM               |
| Run State     | Completed            | Software Version   | LCS480 1.5.1.62 SP3 - UDF 2.1.0.26 |
| Macro         |                      | Macro Owner        |                                    |
| Macro Status  |                      |                    |                                    |
| Templates     | gongying             | Plate ID           |                                    |
| Test ID       |                      | Lot ID             |                                    |
| Color Comp ID |                      |                    |                                    |
| Run Notes     |                      |                    |                                    |

## Programs

|              |         |               |      |
|--------------|---------|---------------|------|
| Program Name | Program |               |      |
| Cycles       | 1       | Analysis Mode | None |

| Target (°C) | Acquisition Mode | Hold (hh:mm:ss) | Ramp Rate (°C/s) | Acquisitions (per °C) | Sec Target (°C) | Step size (°C) | Step Delay (cycles) |
|-------------|------------------|-----------------|------------------|-----------------------|-----------------|----------------|---------------------|
| 95          | None             | 00:00:30        | 4.40             |                       | 0               | 0              | 0                   |

|              |         |               |                |
|--------------|---------|---------------|----------------|
| Program Name | Program |               |                |
| Cycles       | 40      | Analysis Mode | Quantification |

| Target (°C) | Acquisition Mode | Hold (hh:mm:ss) | Ramp Rate (°C/s) | Acquisitions (per °C) | Sec Target (°C) | Step size (°C) | Step Delay (cycles) |
|-------------|------------------|-----------------|------------------|-----------------------|-----------------|----------------|---------------------|
| 95          | None             | 00:00:15        | 4.40             |                       | 0               | 0              | 0                   |
| 60          | Single           | 00:00:30        | 2.20             |                       | 0               | 0              | 0                   |

|              |         |               |                |
|--------------|---------|---------------|----------------|
| Program Name | Program |               |                |
| Cycles       | 1       | Analysis Mode | Melting Curves |

| Target (°C) | Acquisition Mode | Hold (hh:mm:ss) | Ramp Rate (°C/s) | Acquisitions (per °C) | Sec Target (°C) | Step size (°C) | Step Delay (cycles) |
|-------------|------------------|-----------------|------------------|-----------------------|-----------------|----------------|---------------------|
| 95          | None             | 00:01:00        | 4.40             |                       | 0               | 0              | 0                   |
| 60          | None             | 00:00:30        | 2.20             |                       | 0               | 0              | 0                   |
| 90          | Continuous       |                 | 0.11             | 5                     | 0               | 0              | 0                   |

|              |         |               |      |
|--------------|---------|---------------|------|
| Program Name | Program |               |      |
| Cycles       | 1       | Analysis Mode | None |

| Target (°C) | Acquisition Mode | Hold (hh:mm:ss) | Ramp Rate (°C/s) | Acquisitions (per °C) | Sec Target (°C) | Step size (°C) | Step Delay (cycles) |
|-------------|------------------|-----------------|------------------|-----------------------|-----------------|----------------|---------------------|
|-------------|------------------|-----------------|------------------|-----------------------|-----------------|----------------|---------------------|

| Target (°C) | Acquisition Mode | Hold (hh:mm:ss) | Ramp Rate (°C/s) | Acquisitions (per °C) | Sec Target (°C) | Step size (°C) | Step Delay (cycles) |
|-------------|------------------|-----------------|------------------|-----------------------|-----------------|----------------|---------------------|
| 40          | None             | 00:00:30        | 2.20             |                       | 0               | 0              | 0                   |

## Samples

|              |           |             |          |              |  |
|--------------|-----------|-------------|----------|--------------|--|
| Sample Count |           | 96          |          |              |  |
| Subset       |           | All Samples |          |              |  |
| Pos          | Name      | ID          | Repl. Of | Sample Notes |  |
| A1           | GAPDH 9   |             |          |              |  |
| A2           | GAPDH 9   |             |          |              |  |
| A3           | GAPDH 9   |             |          |              |  |
| A4           | GAPDH 10  |             |          |              |  |
| A5           | GAPDH 10  |             |          |              |  |
| A6           | GAPDH 10  |             |          |              |  |
| A7           | GAPDH 11  |             |          |              |  |
| A8           | GAPDH 11  |             |          |              |  |
| A9           | GAPDH 11  |             |          |              |  |
| A10          | GAPDH 12  |             |          |              |  |
| A11          | GAPDH 12  |             |          |              |  |
| A12          | GAPDH 12  |             |          |              |  |
| B1           | FCER1A 9  |             |          |              |  |
| B2           | FCER1A 9  |             |          |              |  |
| B3           | FCER1A 9  |             |          |              |  |
| B4           | FCER1A 10 |             |          |              |  |
| B5           | FCER1A 10 |             |          |              |  |
| B6           | FCER1A 10 |             |          |              |  |
| B7           | FCER1A 11 |             |          |              |  |
| B8           | FCER1A 11 |             |          |              |  |
| B9           | FCER1A 11 |             |          |              |  |
| B10          | FCER1A 12 |             |          |              |  |
| B11          | FCER1A 12 |             |          |              |  |
| B12          | FCER1A 12 |             |          |              |  |
| C1           | RGS1 9    |             |          |              |  |
| C2           | RGS1 9    |             |          |              |  |
| C3           | RGS1 9    |             |          |              |  |
| C4           | RGS1 10   |             |          |              |  |
| C5           | RGS1 10   |             |          |              |  |
| C6           | RGS1 10   |             |          |              |  |
| C7           | RGS1 1    |             |          |              |  |
| C8           | RGS1 1    |             |          |              |  |
| C9           | RGS1 1    |             |          |              |  |
| C10          | RGS1 12   |             |          |              |  |
| C11          | RGS1 12   |             |          |              |  |
| C12          | RGS1 12   |             |          |              |  |

## Samples

| Sample Count |           | 96          |          |              |
|--------------|-----------|-------------|----------|--------------|
| Subset       |           | All Samples |          |              |
| Pos          | Name      | ID          | Repl. Of | Sample Notes |
| D1           | GAPDH 13  |             |          |              |
| D2           | GAPDH 13  |             |          |              |
| D3           | GAPDH 13  |             |          |              |
| D4           | GAPDH 14  |             |          |              |
| D5           | GAPDH 14  |             |          |              |
| D6           | GAPDH 14  |             |          |              |
| D7           | GAPDH 15  |             |          |              |
| D8           | GAPDH 15  |             |          |              |
| D9           | GAPDH 15  |             |          |              |
| D10          | GAPDH 16  |             |          |              |
| D11          | GAPDH 16  |             |          |              |
| D12          | GAPDH 16  |             |          |              |
| E1           | FCER1A 13 |             |          |              |
| E2           | FCER1A 13 |             |          |              |
| E3           | FCER1A 13 |             |          |              |
| E4           | FCER1A 14 |             |          |              |
| E5           | FCER1A 14 |             |          |              |
| E6           | FCER1A 14 |             |          |              |
| E7           | FCER1A 15 |             |          |              |
| E8           | FCER1A 15 |             |          |              |
| E9           | FCER1A 15 |             |          |              |
| E10          | FCER1A 16 |             |          |              |
| E11          | FCER1A 16 |             |          |              |
| E12          | FCER1A 16 |             |          |              |
| F1           | RGS1 13   |             |          |              |
| F2           | RGS1 13   |             |          |              |
| F3           | RGS1 13   |             |          |              |
| F4           | RGS1 14   |             |          |              |
| F5           | RGS1 14   |             |          |              |
| F6           | RGS1 14   |             |          |              |
| F7           | RGS1 15   |             |          |              |
| F8           | RGS1 15   |             |          |              |
| F9           | RGS1 15   |             |          |              |
| F10          | RGS1 16   |             |          |              |
| F11          | RGS1 16   |             |          |              |
| F12          | RGS1 16   |             |          |              |
| G1           | blank     |             |          |              |
| G2           | blank     |             |          |              |
| G3           | blank     |             |          |              |

Samples

|              |       |             |          |              |  |
|--------------|-------|-------------|----------|--------------|--|
| Sample Count |       | 96          |          |              |  |
| Subset       |       | All Samples |          |              |  |
| Pos          | Name  | ID          | Repl. Of | Sample Notes |  |
| G4           | blank |             |          |              |  |
| G5           | blank |             |          |              |  |
| G6           | blank |             |          |              |  |
| G7           | blank |             |          |              |  |
| G8           | blank |             |          |              |  |
| G9           | blank |             |          |              |  |
| G10          | blank |             |          |              |  |
| G11          | blank |             |          |              |  |
| G12          | blank |             |          |              |  |
| H1           | blank |             |          |              |  |
| H2           | blank |             |          |              |  |
| H3           | blank |             |          |              |  |
| H4           | blank |             |          |              |  |
| H5           | blank |             |          |              |  |
| H6           | blank |             |          |              |  |
| H7           | blank |             |          |              |  |
| H8           | blank |             |          |              |  |
| H9           | blank |             |          |              |  |
| H10          | blank |             |          |              |  |
| H11          | blank |             |          |              |  |
| H12          | blank |             |          |              |  |

Instrument

|      |      |               |       |
|------|------|---------------|-------|
| Name | Z480 | Serial Number | 56319 |
|------|------|---------------|-------|

Revision History

|          |      |      |        |
|----------|------|------|--------|
| Revision | Date | User | Reason |
|          |      |      |        |

Abs Quant/2nd Derivative Max for All Samples (Abs Quant/2nd Derivative Max)

Settings

|                    |                 |  |       |  |
|--------------------|-----------------|--|-------|--|
| Channel            | 465-510         |  |       |  |
| Color Compensation | Off             |  |       |  |
| Program            | Program         |  | Units |  |
| Mode               | High Confidence |  |       |  |

|             |             |
|-------------|-------------|
| Subset Name | All Samples |
|-------------|-------------|

Results

|                                                   |      |    |               |          |        |
|---------------------------------------------------|------|----|---------------|----------|--------|
| > Late Cycle (Five cycles) has higher uncertainty | Type | CP | Concentration | Standard | Status |
|---------------------------------------------------|------|----|---------------|----------|--------|

## Results

| Inc                                 | Pos | Name      | Type    | CP    | Concentration | Standard | Status |
|-------------------------------------|-----|-----------|---------|-------|---------------|----------|--------|
| <input checked="" type="checkbox"/> | A1  | GAPDH 9   | Unknown | 30.70 |               |          |        |
| <input checked="" type="checkbox"/> | A2  | GAPDH 9   | Unknown | 32.82 |               |          |        |
| <input checked="" type="checkbox"/> | A3  | GAPDH 9   | Unknown | 35.00 |               |          | >      |
| <input checked="" type="checkbox"/> | A4  | GAPDH 10  | Unknown | 32.35 |               |          |        |
| <input checked="" type="checkbox"/> | A5  | GAPDH 10  | Unknown | 29.30 |               |          |        |
| <input checked="" type="checkbox"/> | A6  | GAPDH 10  | Unknown | 35.00 |               |          | >      |
| <input checked="" type="checkbox"/> | A7  | GAPDH 11  | Unknown | 25.51 |               |          |        |
| <input checked="" type="checkbox"/> | A8  | GAPDH 11  | Unknown | 32.47 |               |          |        |
| <input checked="" type="checkbox"/> | A9  | GAPDH 11  | Unknown | 35.00 |               |          | >      |
| <input checked="" type="checkbox"/> | A10 | GAPDH 12  | Unknown | 35.00 |               |          | >      |
| <input checked="" type="checkbox"/> | A11 | GAPDH 12  | Unknown | 28.74 |               |          |        |
| <input checked="" type="checkbox"/> | A12 | GAPDH 12  | Unknown | 35.00 |               |          | >      |
| <input checked="" type="checkbox"/> | B1  | FCER1A 9  | Unknown | 30.00 |               |          |        |
| <input checked="" type="checkbox"/> | B2  | FCER1A 9  | Unknown | 29.91 |               |          |        |
| <input checked="" type="checkbox"/> | B3  | FCER1A 9  | Unknown | 31.11 |               |          |        |
| <input checked="" type="checkbox"/> | B4  | FCER1A 10 | Unknown | 30.02 |               |          |        |
| <input checked="" type="checkbox"/> | B5  | FCER1A 10 | Unknown | 35.00 |               |          | >      |
| <input checked="" type="checkbox"/> | B6  | FCER1A 10 | Unknown | 31.51 |               |          |        |
| <input checked="" type="checkbox"/> | B7  | FCER1A 11 | Unknown | 29.17 |               |          |        |
| <input checked="" type="checkbox"/> | B8  | FCER1A 11 | Unknown | 31.13 |               |          |        |
| <input checked="" type="checkbox"/> | B9  | FCER1A 11 | Unknown | 30.67 |               |          |        |
| <input checked="" type="checkbox"/> | B10 | FCER1A 12 | Unknown | 30.94 |               |          |        |
| <input checked="" type="checkbox"/> | B11 | FCER1A 12 | Unknown | 30.75 |               |          |        |
| <input checked="" type="checkbox"/> | B12 | FCER1A 12 | Unknown | 31.26 |               |          |        |
| <input checked="" type="checkbox"/> | C1  | RGS1 9    | Unknown | 35.00 |               |          | >      |
| <input checked="" type="checkbox"/> | C2  | RGS1 9    | Unknown | 33.00 |               |          |        |
| <input checked="" type="checkbox"/> | C3  | RGS1 9    | Unknown | 35.00 |               |          | >      |
| <input checked="" type="checkbox"/> | C4  | RGS1 10   | Unknown | 35.00 |               |          | >      |
| <input checked="" type="checkbox"/> | C5  | RGS1 10   | Unknown | 35.00 |               |          | >      |
| <input checked="" type="checkbox"/> | C6  | RGS1 10   | Unknown | 35.00 |               |          | >      |
| <input checked="" type="checkbox"/> | C7  | RGS1 1    | Unknown | 34.54 |               |          |        |
| <input checked="" type="checkbox"/> | C8  | RGS1 1    | Unknown | 35.00 |               |          | >      |
| <input checked="" type="checkbox"/> | C9  | RGS1 1    | Unknown | 35.00 |               |          | >      |
| <input checked="" type="checkbox"/> | C10 | RGS1 12   | Unknown | 32.67 |               |          |        |
| <input checked="" type="checkbox"/> | C11 | RGS1 12   | Unknown | 33.81 |               |          |        |
| <input checked="" type="checkbox"/> | C12 | RGS1 12   | Unknown | 33.44 |               |          |        |
| <input checked="" type="checkbox"/> | D1  | GAPDH 13  | Unknown | 32.05 |               |          |        |

> - Late Cp call (last five cycles) has higher uncertainty

## Results

| Inc                                 | Pos | Name      | Type    | CP    | Concentration | Standard | Status |
|-------------------------------------|-----|-----------|---------|-------|---------------|----------|--------|
| <input checked="" type="checkbox"/> | D2  | GAPDH 13  | Unknown | 31.62 |               |          |        |
| <input checked="" type="checkbox"/> | D3  | GAPDH 13  | Unknown | 35.00 |               |          | >      |
| <input checked="" type="checkbox"/> | D4  | GAPDH 14  | Unknown | 32.88 |               |          |        |
| <input checked="" type="checkbox"/> | D5  | GAPDH 14  | Unknown | 31.08 |               |          |        |
| <input checked="" type="checkbox"/> | D6  | GAPDH 14  | Unknown | 35.00 |               |          | >      |
| <input checked="" type="checkbox"/> | D7  | GAPDH 15  | Unknown | 30.57 |               |          |        |
| <input checked="" type="checkbox"/> | D8  | GAPDH 15  | Unknown | 35.00 |               |          | >      |
| <input checked="" type="checkbox"/> | D9  | GAPDH 15  | Unknown | 33.36 |               |          |        |
| <input checked="" type="checkbox"/> | D10 | GAPDH 16  | Unknown | 33.20 |               |          |        |
| <input checked="" type="checkbox"/> | D11 | GAPDH 16  | Unknown | 35.00 |               |          | >      |
| <input checked="" type="checkbox"/> | D12 | GAPDH 16  | Unknown | 33.35 |               |          |        |
| <input checked="" type="checkbox"/> | E1  | FCER1A 13 | Unknown | 29.81 |               |          |        |
| <input checked="" type="checkbox"/> | E2  | FCER1A 13 | Unknown | 29.49 |               |          |        |
| <input checked="" type="checkbox"/> | E3  | FCER1A 13 | Unknown | 31.04 |               |          |        |
| <input checked="" type="checkbox"/> | E4  | FCER1A 14 | Unknown | 29.49 |               |          |        |
| <input checked="" type="checkbox"/> | E5  | FCER1A 14 | Unknown | 28.67 |               |          |        |
| <input checked="" type="checkbox"/> | E6  | FCER1A 14 | Unknown | 28.74 |               |          |        |
| <input checked="" type="checkbox"/> | E7  | FCER1A 15 | Unknown | 29.11 |               |          |        |
| <input checked="" type="checkbox"/> | E8  | FCER1A 15 | Unknown | 32.33 |               |          |        |
| <input checked="" type="checkbox"/> | E9  | FCER1A 15 | Unknown | 30.88 |               |          |        |
| <input checked="" type="checkbox"/> | E10 | FCER1A 16 | Unknown | 29.97 |               |          |        |
| <input checked="" type="checkbox"/> | E11 | FCER1A 16 | Unknown | 30.96 |               |          |        |
| <input checked="" type="checkbox"/> | E12 | FCER1A 16 | Unknown | 30.64 |               |          |        |
| <input checked="" type="checkbox"/> | F1  | RGS1 13   | Unknown | 31.90 |               |          |        |
| <input checked="" type="checkbox"/> | F2  | RGS1 13   | Unknown | 33.90 |               |          |        |
| <input checked="" type="checkbox"/> | F3  | RGS1 13   | Unknown | 35.00 |               |          | >      |
| <input checked="" type="checkbox"/> | F4  | RGS1 14   | Unknown | 32.42 |               |          |        |
| <input checked="" type="checkbox"/> | F5  | RGS1 14   | Unknown | 32.70 |               |          |        |
| <input checked="" type="checkbox"/> | F6  | RGS1 14   | Unknown | 31.23 |               |          |        |
| <input checked="" type="checkbox"/> | F7  | RGS1 15   | Unknown | 35.00 |               |          | >      |
| <input checked="" type="checkbox"/> | F8  | RGS1 15   | Unknown | 35.00 |               |          | >      |
| <input checked="" type="checkbox"/> | F9  | RGS1 15   | Unknown | 33.13 |               |          |        |
| <input checked="" type="checkbox"/> | F10 | RGS1 16   | Unknown | 32.74 |               |          |        |
| <input checked="" type="checkbox"/> | F11 | RGS1 16   | Unknown | 33.21 |               |          |        |
| <input checked="" type="checkbox"/> | F12 | RGS1 16   | Unknown | 35.00 |               |          | >      |
| <input checked="" type="checkbox"/> | G1  | blank     | Unknown |       |               |          |        |
| <input checked="" type="checkbox"/> | G2  | blank     | Unknown |       |               |          |        |

> - Late Cp call (last five cycles) has higher uncertainty

---

**Results**

| Inc                                 | Pos | Name  | Type    | CP | Concentration | Standard | Status |
|-------------------------------------|-----|-------|---------|----|---------------|----------|--------|
| <input checked="" type="checkbox"/> | G3  | blank | Unknown |    |               |          |        |
| <input checked="" type="checkbox"/> | G4  | blank | Unknown |    |               |          |        |
| <input checked="" type="checkbox"/> | G5  | blank | Unknown |    |               |          |        |
| <input checked="" type="checkbox"/> | G6  | blank | Unknown |    |               |          |        |
| <input checked="" type="checkbox"/> | G7  | blank | Unknown |    |               |          |        |
| <input checked="" type="checkbox"/> | G8  | blank | Unknown |    |               |          |        |
| <input checked="" type="checkbox"/> | G9  | blank | Unknown |    |               |          |        |
| <input checked="" type="checkbox"/> | G10 | blank | Unknown |    |               |          |        |
| <input checked="" type="checkbox"/> | G11 | blank | Unknown |    |               |          |        |
| <input checked="" type="checkbox"/> | G12 | blank | Unknown |    |               |          |        |
| <input checked="" type="checkbox"/> | H1  | blank | Unknown |    |               |          |        |
| <input checked="" type="checkbox"/> | H2  | blank | Unknown |    |               |          |        |
| <input checked="" type="checkbox"/> | H3  | blank | Unknown |    |               |          |        |
| <input checked="" type="checkbox"/> | H4  | blank | Unknown |    |               |          |        |
| <input checked="" type="checkbox"/> | H5  | blank | Unknown |    |               |          |        |
| <input checked="" type="checkbox"/> | H6  | blank | Unknown |    |               |          |        |
| <input checked="" type="checkbox"/> | H7  | blank | Unknown |    |               |          |        |
| <input checked="" type="checkbox"/> | H8  | blank | Unknown |    |               |          |        |
| <input checked="" type="checkbox"/> | H9  | blank | Unknown |    |               |          |        |
| <input checked="" type="checkbox"/> | H10 | blank | Unknown |    |               |          |        |
| <input checked="" type="checkbox"/> | H11 | blank | Unknown |    |               |          |        |
| <input checked="" type="checkbox"/> | H12 | blank | Unknown |    |               |          |        |

> - Late Cp call (last five cycles) has higher uncertainty

### Amplification Curves

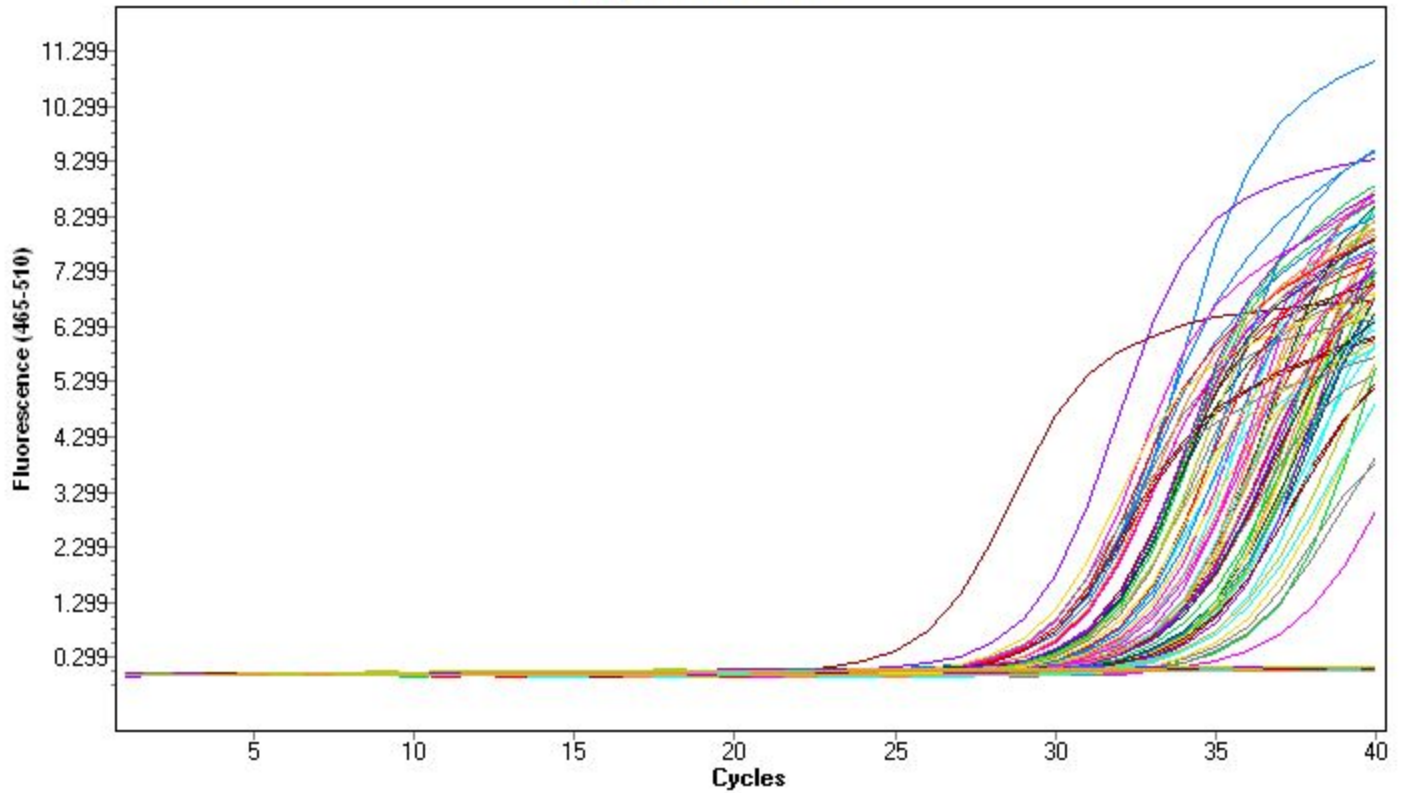

### Standard Curve

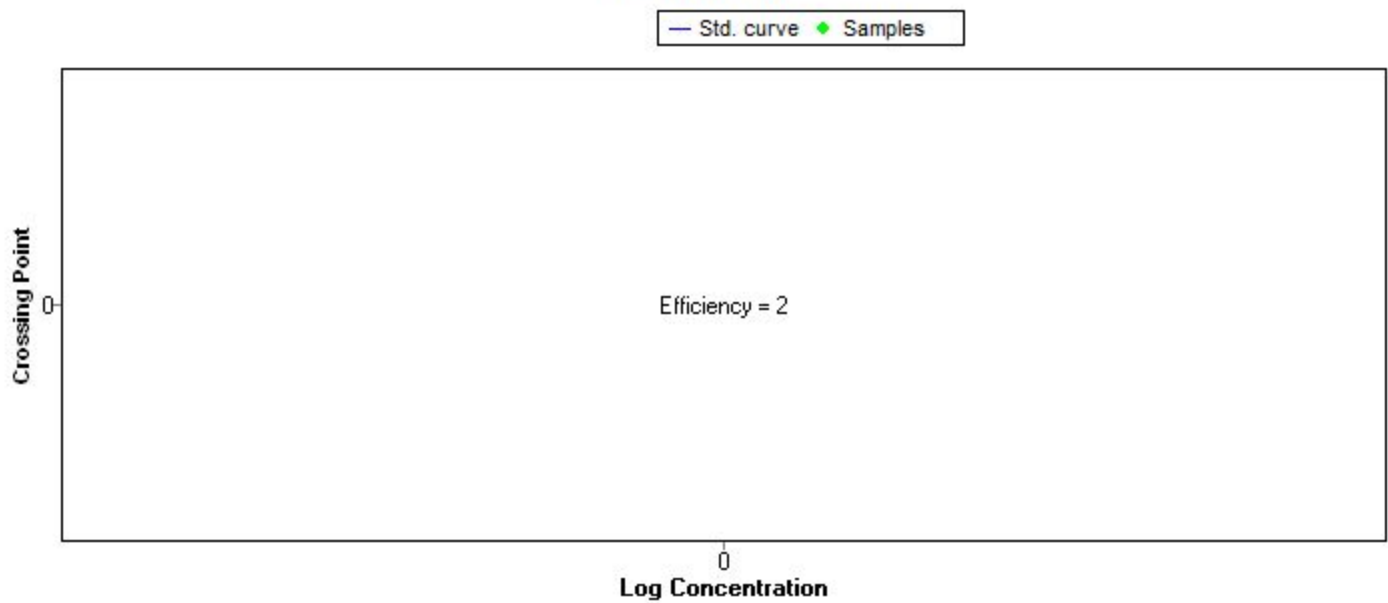

### Analysis Notes

Abs Quant/Fit Points for All Samples (Abs Quant/Fit Points)



## Settings

|                    |                       |                  |        |                    |         |  |
|--------------------|-----------------------|------------------|--------|--------------------|---------|--|
| Channel            | 465-510               |                  |        |                    |         |  |
| Color Compensation | Off                   |                  |        |                    |         |  |
| Standard Curve     | Set Efficiency (2.00) |                  |        |                    |         |  |
| Program            | Program               |                  |        |                    | Units   |  |
| First Cycle        | 1                     | Last Cycle       | 40     | Background         | 2-6     |  |
| Noiseband Method   | Auto                  | Noiseband        | 0.2576 | STD Dev Multiplier | 12.0000 |  |
| # of Fit Points    | 2                     | Threshold Method | Auto   | Threshold          | 0.2576  |  |

|             |             |
|-------------|-------------|
| Subset Name | All Samples |
|-------------|-------------|

## Results

| Inc                                 | Pos | Name      | Type    | CP    | Concentration | Standard | Status |
|-------------------------------------|-----|-----------|---------|-------|---------------|----------|--------|
| <input checked="" type="checkbox"/> | A1  | GAPDH 9   | Unknown | 25.05 |               |          |        |
| <input checked="" type="checkbox"/> | A2  | GAPDH 9   | Unknown | 29.73 |               |          |        |
| <input checked="" type="checkbox"/> | A3  | GAPDH 9   | Unknown | 32.85 |               |          |        |
| <input checked="" type="checkbox"/> | A4  | GAPDH 10  | Unknown | 27.85 |               |          |        |
| <input checked="" type="checkbox"/> | A5  | GAPDH 10  | Unknown | 26.51 |               |          |        |
| <input checked="" type="checkbox"/> | A6  | GAPDH 10  | Unknown | 30.93 |               |          |        |
| <input checked="" type="checkbox"/> | A7  | GAPDH 11  | Unknown | 22.76 |               |          |        |
| <input checked="" type="checkbox"/> | A8  | GAPDH 11  | Unknown | 27.88 |               |          |        |
| <input checked="" type="checkbox"/> | A9  | GAPDH 11  | Unknown | 30.77 |               |          |        |
| <input checked="" type="checkbox"/> | A10 | GAPDH 12  | Unknown | 30.67 |               |          |        |
| <input checked="" type="checkbox"/> | A11 | GAPDH 12  | Unknown | 24.34 |               |          |        |
| <input checked="" type="checkbox"/> | A12 | GAPDH 12  | Unknown | 29.92 |               |          |        |
| <input checked="" type="checkbox"/> | B1  | FCER1A 9  | Unknown | 26.26 |               |          |        |
| <input checked="" type="checkbox"/> | B2  | FCER1A 9  | Unknown | 27.33 |               |          |        |
| <input checked="" type="checkbox"/> | B3  | FCER1A 9  | Unknown | 27.97 |               |          |        |
| <input checked="" type="checkbox"/> | B4  | FCER1A 10 | Unknown | 27.42 |               |          |        |
| <input checked="" type="checkbox"/> | B5  | FCER1A 10 | Unknown | 32.75 |               |          |        |
| <input checked="" type="checkbox"/> | B6  | FCER1A 10 | Unknown | 28.71 |               |          |        |
| <input checked="" type="checkbox"/> | B7  | FCER1A 11 | Unknown | 26.87 |               |          |        |
| <input checked="" type="checkbox"/> | B8  | FCER1A 11 | Unknown | 27.42 |               |          |        |
| <input checked="" type="checkbox"/> | B9  | FCER1A 11 | Unknown | 27.64 |               |          |        |
| <input checked="" type="checkbox"/> | B10 | FCER1A 12 | Unknown | 27.95 |               |          |        |
| <input checked="" type="checkbox"/> | B11 | FCER1A 12 | Unknown | 27.49 |               |          |        |
| <input checked="" type="checkbox"/> | B12 | FCER1A 12 | Unknown | 28.26 |               |          |        |
| <input checked="" type="checkbox"/> | C1  | RGS1 9    | Unknown | 30.38 |               |          |        |
| <input checked="" type="checkbox"/> | C2  | RGS1 9    | Unknown | 30.46 |               |          |        |
| <input checked="" type="checkbox"/> | C3  | RGS1 9    | Unknown | 31.22 |               |          |        |

## Results

| Inc                                 | Pos | Name      | Type    | CP    | Concentration | Standard | Status |
|-------------------------------------|-----|-----------|---------|-------|---------------|----------|--------|
| <input checked="" type="checkbox"/> | C4  | RGS1 10   | Unknown | 33.81 |               |          |        |
| <input checked="" type="checkbox"/> | C5  | RGS1 10   | Unknown | 33.17 |               |          |        |
| <input checked="" type="checkbox"/> | C6  | RGS1 10   | Unknown | 32.75 |               |          |        |
| <input checked="" type="checkbox"/> | C7  | RGS1 1    | Unknown | 31.75 |               |          |        |
| <input checked="" type="checkbox"/> | C8  | RGS1 1    | Unknown | 31.48 |               |          |        |
| <input checked="" type="checkbox"/> | C9  | RGS1 1    | Unknown | 30.52 |               |          |        |
| <input checked="" type="checkbox"/> | C10 | RGS1 12   | Unknown | 29.48 |               |          |        |
| <input checked="" type="checkbox"/> | C11 | RGS1 12   | Unknown | 29.81 |               |          |        |
| <input checked="" type="checkbox"/> | C12 | RGS1 12   | Unknown | 28.79 |               |          |        |
| <input checked="" type="checkbox"/> | D1  | GAPDH 13  | Unknown | 27.46 |               |          |        |
| <input checked="" type="checkbox"/> | D2  | GAPDH 13  | Unknown | 28.57 |               |          |        |
| <input checked="" type="checkbox"/> | D3  | GAPDH 13  | Unknown | 30.67 |               |          |        |
| <input checked="" type="checkbox"/> | D4  | GAPDH 14  | Unknown | 29.46 |               |          |        |
| <input checked="" type="checkbox"/> | D5  | GAPDH 14  | Unknown | 27.93 |               |          |        |
| <input checked="" type="checkbox"/> | D6  | GAPDH 14  | Unknown | 30.73 |               |          |        |
| <input checked="" type="checkbox"/> | D7  | GAPDH 15  | Unknown | 27.68 |               |          |        |
| <input checked="" type="checkbox"/> | D8  | GAPDH 15  | Unknown | 29.95 |               |          |        |
| <input checked="" type="checkbox"/> | D9  | GAPDH 15  | Unknown | 29.56 |               |          |        |
| <input checked="" type="checkbox"/> | D10 | GAPDH 16  | Unknown | 29.74 |               |          |        |
| <input checked="" type="checkbox"/> | D11 | GAPDH 16  | Unknown | 30.51 |               |          |        |
| <input checked="" type="checkbox"/> | D12 | GAPDH 16  | Unknown | 27.34 |               |          |        |
| <input checked="" type="checkbox"/> | E1  | FCER1A 13 | Unknown | 26.57 |               |          |        |
| <input checked="" type="checkbox"/> | E2  | FCER1A 13 | Unknown | 26.64 |               |          |        |
| <input checked="" type="checkbox"/> | E3  | FCER1A 13 | Unknown | 28.29 |               |          |        |
| <input checked="" type="checkbox"/> | E4  | FCER1A 14 | Unknown | 26.65 |               |          |        |
| <input checked="" type="checkbox"/> | E5  | FCER1A 14 | Unknown | 26.48 |               |          |        |
| <input checked="" type="checkbox"/> | E6  | FCER1A 14 | Unknown | 26.32 |               |          |        |
| <input checked="" type="checkbox"/> | E7  | FCER1A 15 | Unknown | 27.00 |               |          |        |
| <input checked="" type="checkbox"/> | E8  | FCER1A 15 | Unknown | 30.23 |               |          |        |
| <input checked="" type="checkbox"/> | E9  | FCER1A 15 | Unknown | 26.37 |               |          |        |
| <input checked="" type="checkbox"/> | E10 | FCER1A 16 | Unknown | 27.48 |               |          |        |
| <input checked="" type="checkbox"/> | E11 | FCER1A 16 | Unknown | 26.96 |               |          |        |
| <input checked="" type="checkbox"/> | E12 | FCER1A 16 | Unknown | 28.52 |               |          |        |
| <input checked="" type="checkbox"/> | F1  | RGS1 13   | Unknown | 28.89 |               |          |        |
| <input checked="" type="checkbox"/> | F2  | RGS1 13   | Unknown | 30.37 |               |          |        |
| <input checked="" type="checkbox"/> | F3  | RGS1 13   | Unknown | 30.52 |               |          |        |
| <input checked="" type="checkbox"/> | F4  | RGS1 14   | Unknown | 29.64 |               |          |        |

## Results

| Inc                                 | Pos | Name    | Type    | CP    | Concentration | Standard | Status |
|-------------------------------------|-----|---------|---------|-------|---------------|----------|--------|
| <input checked="" type="checkbox"/> | F5  | RGS1 14 | Unknown | 29.91 |               |          |        |
| <input checked="" type="checkbox"/> | F6  | RGS1 14 | Unknown | 28.65 |               |          |        |
| <input checked="" type="checkbox"/> | F7  | RGS1 15 | Unknown | 31.25 |               |          |        |
| <input checked="" type="checkbox"/> | F8  | RGS1 15 | Unknown | 32.28 |               |          |        |
| <input checked="" type="checkbox"/> | F9  | RGS1 15 | Unknown | 30.52 |               |          |        |
| <input checked="" type="checkbox"/> | F10 | RGS1 16 | Unknown | 30.19 |               |          |        |
| <input checked="" type="checkbox"/> | F11 | RGS1 16 | Unknown | 30.43 |               |          |        |
| <input checked="" type="checkbox"/> | F12 | RGS1 16 | Unknown | 31.65 |               |          |        |
| <input checked="" type="checkbox"/> | G1  | blank   | Unknown |       |               |          |        |
| <input checked="" type="checkbox"/> | G2  | blank   | Unknown |       |               |          |        |
| <input checked="" type="checkbox"/> | G3  | blank   | Unknown |       |               |          |        |
| <input checked="" type="checkbox"/> | G4  | blank   | Unknown |       |               |          |        |
| <input checked="" type="checkbox"/> | G5  | blank   | Unknown |       |               |          |        |
| <input checked="" type="checkbox"/> | G6  | blank   | Unknown |       |               |          |        |
| <input checked="" type="checkbox"/> | G7  | blank   | Unknown |       |               |          |        |
| <input checked="" type="checkbox"/> | G8  | blank   | Unknown |       |               |          |        |
| <input checked="" type="checkbox"/> | G9  | blank   | Unknown |       |               |          |        |
| <input checked="" type="checkbox"/> | G10 | blank   | Unknown |       |               |          |        |
| <input checked="" type="checkbox"/> | G11 | blank   | Unknown |       |               |          |        |
| <input checked="" type="checkbox"/> | G12 | blank   | Unknown |       |               |          |        |
| <input checked="" type="checkbox"/> | H1  | blank   | Unknown |       |               |          |        |
| <input checked="" type="checkbox"/> | H2  | blank   | Unknown |       |               |          |        |
| <input checked="" type="checkbox"/> | H3  | blank   | Unknown |       |               |          |        |
| <input checked="" type="checkbox"/> | H4  | blank   | Unknown |       |               |          |        |
| <input checked="" type="checkbox"/> | H5  | blank   | Unknown |       |               |          |        |
| <input checked="" type="checkbox"/> | H6  | blank   | Unknown |       |               |          |        |
| <input checked="" type="checkbox"/> | H7  | blank   | Unknown |       |               |          |        |
| <input checked="" type="checkbox"/> | H8  | blank   | Unknown |       |               |          |        |
| <input checked="" type="checkbox"/> | H9  | blank   | Unknown |       |               |          |        |
| <input checked="" type="checkbox"/> | H10 | blank   | Unknown |       |               |          |        |
| <input checked="" type="checkbox"/> | H11 | blank   | Unknown | 32.17 |               |          |        |
| <input checked="" type="checkbox"/> | H12 | blank   | Unknown |       |               |          |        |

**Amplification Curves**

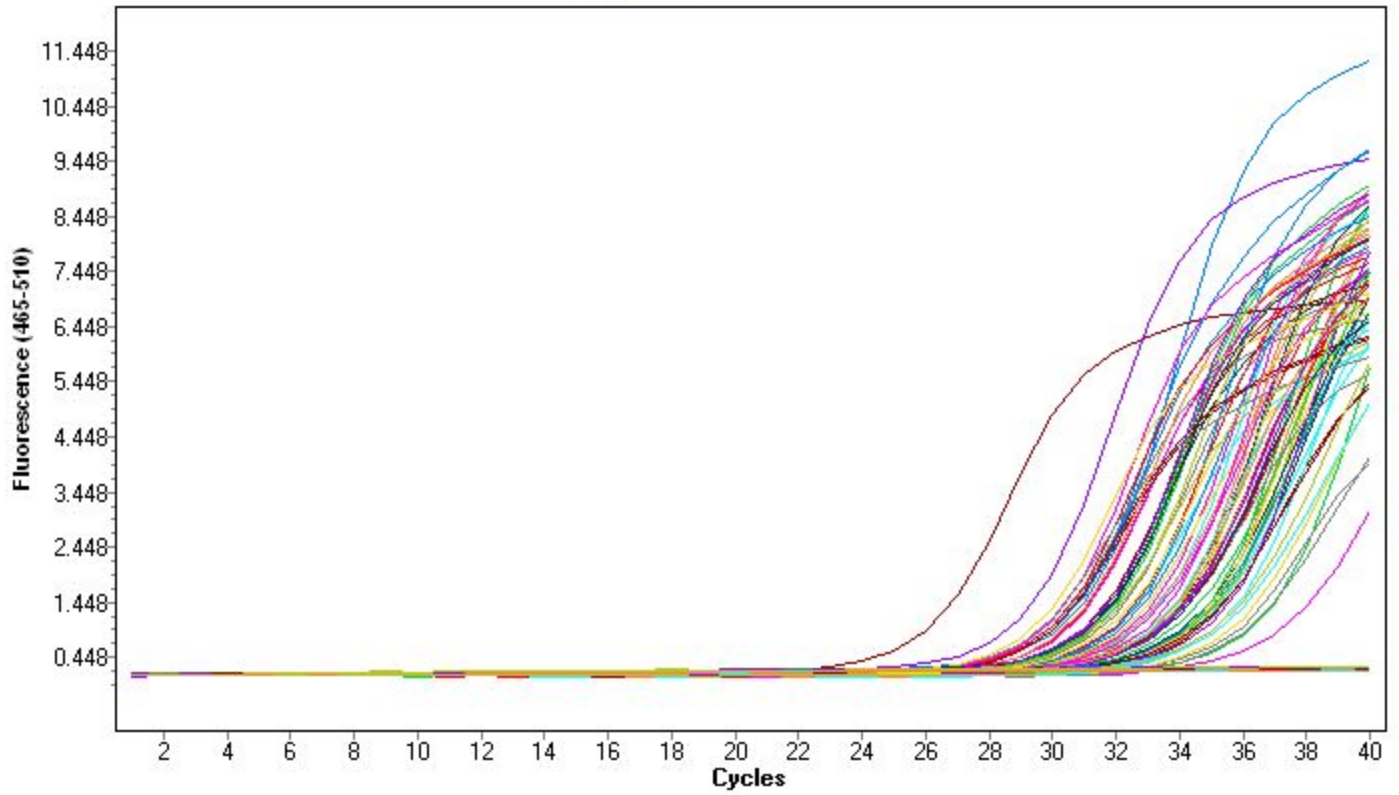

**Amplification Curves**

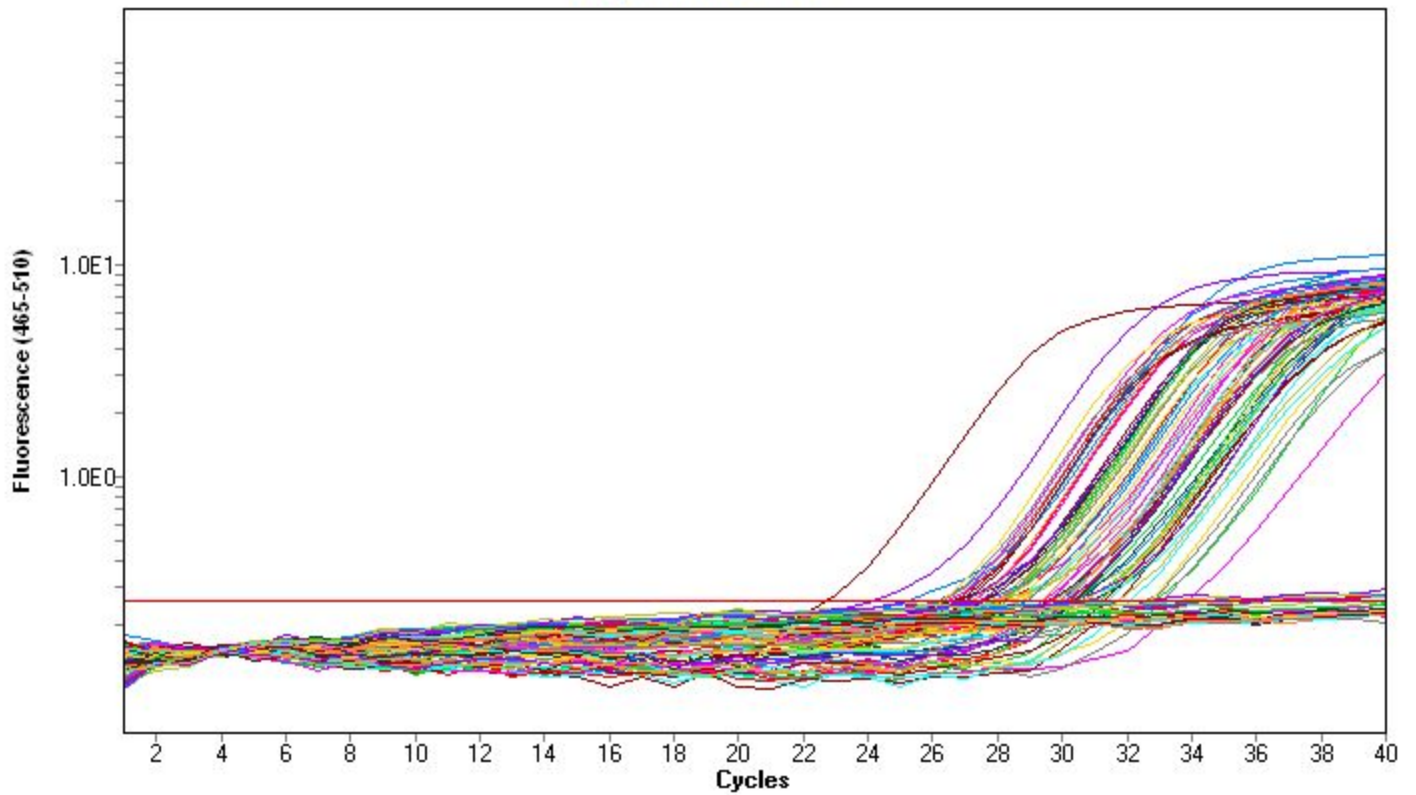

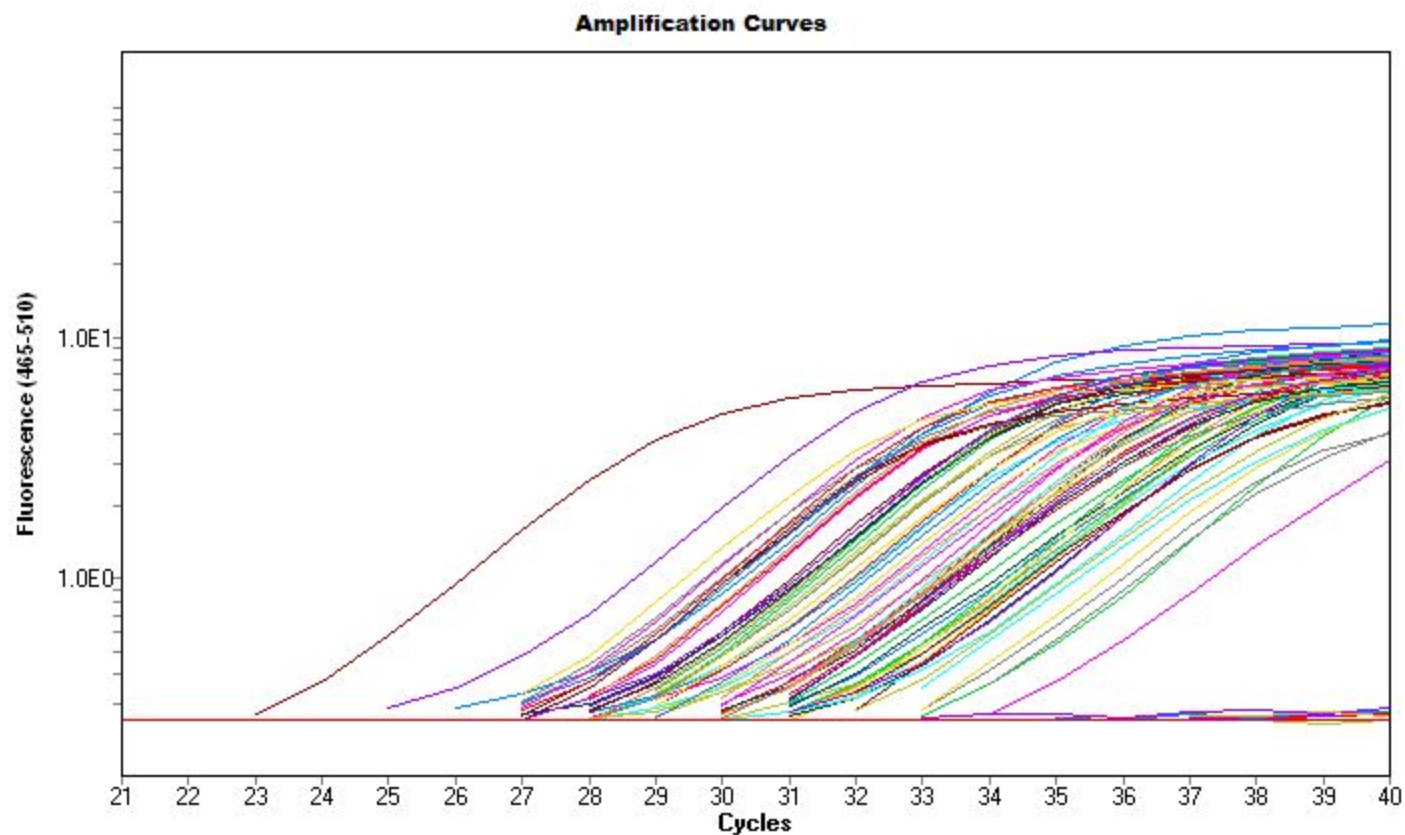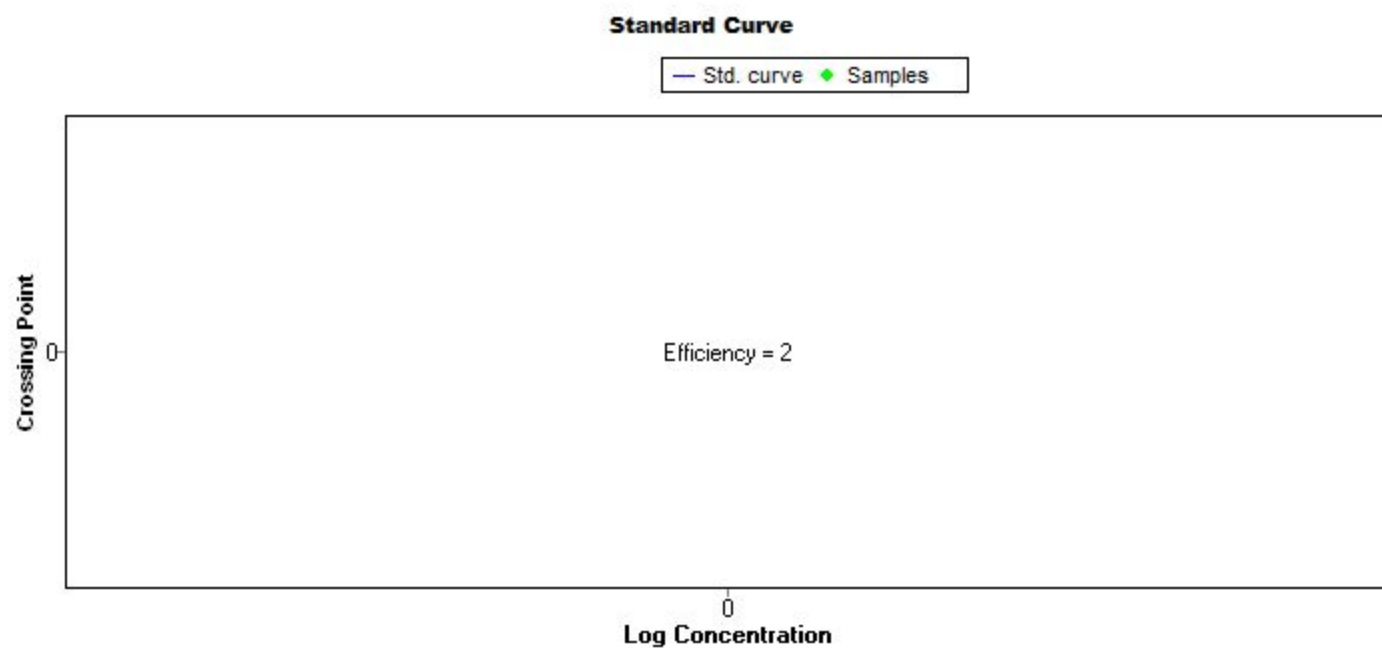

#### Analysis Notes

#### Gene Scanning for All Samples (Gene Scanning)

|                |             |                     |             |
|----------------|-------------|---------------------|-------------|
| Channel        | 465-510     | Color Compensation  | Off         |
| Program Name   | Program     |                     |             |
| Std's Settings | Auto-Group  |                     |             |
| Sensitivity    | 0.30        | Threshold (TmShift) | 5.000       |
| Pre-melt       | 69.99-70.99 | Post-melt Temp      | 87.95-88.95 |

|             |             |
|-------------|-------------|
| Subset Name | All Samples |
|-------------|-------------|

## Results

| Inc                                 | Pos. | Sample Name | Sample Type | Group    | Status |
|-------------------------------------|------|-------------|-------------|----------|--------|
| <input checked="" type="checkbox"/> | A1   | GAPDH 9     | Unknown     | 2        |        |
| <input checked="" type="checkbox"/> | A2   | GAPDH 9     | Unknown     | Unknown  |        |
| <input checked="" type="checkbox"/> | A3   | GAPDH 9     | Unknown     | Negative |        |
| <input checked="" type="checkbox"/> | A4   | GAPDH 10    | Unknown     | 2        |        |
| <input checked="" type="checkbox"/> | A5   | GAPDH 10    | Unknown     | 5        |        |
| <input checked="" type="checkbox"/> | A6   | GAPDH 10    | Unknown     | 2        |        |
| <input checked="" type="checkbox"/> | A7   | GAPDH 11    | Unknown     | 5        |        |
| <input checked="" type="checkbox"/> | A8   | GAPDH 11    | Unknown     | Unknown  |        |
| <input checked="" type="checkbox"/> | A9   | GAPDH 11    | Unknown     | 2        |        |
| <input checked="" type="checkbox"/> | A10  | GAPDH 12    | Unknown     | Unknown  |        |
| <input checked="" type="checkbox"/> | A11  | GAPDH 12    | Unknown     | 5        |        |
| <input checked="" type="checkbox"/> | A12  | GAPDH 12    | Unknown     | 2        |        |
| <input checked="" type="checkbox"/> | B1   | FCER1A 9    | Unknown     | 4        |        |
| <input checked="" type="checkbox"/> | B2   | FCER1A 9    | Unknown     | 4        |        |
| <input checked="" type="checkbox"/> | B3   | FCER1A 9    | Unknown     | 3        |        |
| <input checked="" type="checkbox"/> | B4   | FCER1A 10   | Unknown     | 5        |        |
| <input checked="" type="checkbox"/> | B5   | FCER1A 10   | Unknown     | Unknown  |        |
| <input checked="" type="checkbox"/> | B6   | FCER1A 10   | Unknown     | 6        |        |
| <input checked="" type="checkbox"/> | B7   | FCER1A 11   | Unknown     | 6        |        |
| <input checked="" type="checkbox"/> | B8   | FCER1A 11   | Unknown     | Unknown  |        |
| <input checked="" type="checkbox"/> | B9   | FCER1A 11   | Unknown     | 4        |        |
| <input checked="" type="checkbox"/> | B10  | FCER1A 12   | Unknown     | 3        |        |
| <input checked="" type="checkbox"/> | B11  | FCER1A 12   | Unknown     | 3        |        |
| <input checked="" type="checkbox"/> | B12  | FCER1A 12   | Unknown     | 3        |        |
| <input checked="" type="checkbox"/> | C1   | RGS1 9      | Unknown     | Unknown  |        |
| <input checked="" type="checkbox"/> | C2   | RGS1 9      | Unknown     | 1        |        |
| <input checked="" type="checkbox"/> | C3   | RGS1 9      | Unknown     | 1        |        |
| <input checked="" type="checkbox"/> | C4   | RGS1 10     | Unknown     | Negative |        |
| <input checked="" type="checkbox"/> | C5   | RGS1 10     | Unknown     | 1        |        |
| <input checked="" type="checkbox"/> | C6   | RGS1 10     | Unknown     | Unknown  |        |
| <input checked="" type="checkbox"/> | C7   | RGS1 1      | Unknown     | 1        |        |

## Results

| Inc                                 | Pos. | Sample Name | Sample Type | Group   | Status |
|-------------------------------------|------|-------------|-------------|---------|--------|
| <input checked="" type="checkbox"/> | C8   | RGS1 1      | Unknown     | 1       |        |
| <input checked="" type="checkbox"/> | C9   | RGS1 1      | Unknown     | 1       |        |
| <input checked="" type="checkbox"/> | C10  | RGS1 12     | Unknown     | 1       |        |
| <input checked="" type="checkbox"/> | C11  | RGS1 12     | Unknown     | 1       |        |
| <input checked="" type="checkbox"/> | C12  | RGS1 12     | Unknown     | Unknown |        |
| <input checked="" type="checkbox"/> | D1   | GAPDH 13    | Unknown     | 2       |        |
| <input checked="" type="checkbox"/> | D2   | GAPDH 13    | Unknown     | 2       |        |
| <input checked="" type="checkbox"/> | D3   | GAPDH 13    | Unknown     | 2       |        |
| <input checked="" type="checkbox"/> | D4   | GAPDH 14    | Unknown     | 2       |        |
| <input checked="" type="checkbox"/> | D5   | GAPDH 14    | Unknown     | 2       |        |
| <input checked="" type="checkbox"/> | D6   | GAPDH 14    | Unknown     | 2       |        |
| <input checked="" type="checkbox"/> | D7   | GAPDH 15    | Unknown     | Unknown |        |
| <input checked="" type="checkbox"/> | D8   | GAPDH 15    | Unknown     | 2       |        |
| <input checked="" type="checkbox"/> | D9   | GAPDH 15    | Unknown     | 2       |        |
| <input checked="" type="checkbox"/> | D10  | GAPDH 16    | Unknown     | 2       |        |
| <input checked="" type="checkbox"/> | D11  | GAPDH 16    | Unknown     | 2       |        |
| <input checked="" type="checkbox"/> | D12  | GAPDH 16    | Unknown     | 2       |        |
| <input checked="" type="checkbox"/> | E1   | FCER1A 13   | Unknown     | 6       |        |
| <input checked="" type="checkbox"/> | E2   | FCER1A 13   | Unknown     | 4       |        |
| <input checked="" type="checkbox"/> | E3   | FCER1A 13   | Unknown     | Unknown |        |
| <input checked="" type="checkbox"/> | E4   | FCER1A 14   | Unknown     | 3       |        |
| <input checked="" type="checkbox"/> | E5   | FCER1A 14   | Unknown     | 4       |        |
| <input checked="" type="checkbox"/> | E6   | FCER1A 14   | Unknown     | 3       |        |
| <input checked="" type="checkbox"/> | E7   | FCER1A 15   | Unknown     | Unknown |        |
| <input checked="" type="checkbox"/> | E8   | FCER1A 15   | Unknown     | 3       |        |
| <input checked="" type="checkbox"/> | E9   | FCER1A 15   | Unknown     | 3       |        |
| <input checked="" type="checkbox"/> | E10  | FCER1A 16   | Unknown     | Unknown |        |
| <input checked="" type="checkbox"/> | E11  | FCER1A 16   | Unknown     | 3       |        |
| <input checked="" type="checkbox"/> | E12  | FCER1A 16   | Unknown     | 3       |        |
| <input checked="" type="checkbox"/> | F1   | RGS1 13     | Unknown     | 1       |        |
| <input checked="" type="checkbox"/> | F2   | RGS1 13     | Unknown     | 1       |        |
| <input checked="" type="checkbox"/> | F3   | RGS1 13     | Unknown     | 1       |        |
| <input checked="" type="checkbox"/> | F4   | RGS1 14     | Unknown     | 1       |        |
| <input checked="" type="checkbox"/> | F5   | RGS1 14     | Unknown     | 1       |        |
| <input checked="" type="checkbox"/> | F6   | RGS1 14     | Unknown     | 1       |        |
| <input checked="" type="checkbox"/> | F7   | RGS1 15     | Unknown     | 1       |        |
| <input checked="" type="checkbox"/> | F8   | RGS1 15     | Unknown     | 1       |        |
| <input checked="" type="checkbox"/> | F9   | RGS1 15     | Unknown     | 1       |        |

## Results

| Inc                                 | Pos. | Sample Name | Sample Type | Group    | Status |
|-------------------------------------|------|-------------|-------------|----------|--------|
| <input checked="" type="checkbox"/> | F10  | RGS1 16     | Unknown     | Unknown  |        |
| <input checked="" type="checkbox"/> | F11  | RGS1 16     | Unknown     | Unknown  |        |
| <input checked="" type="checkbox"/> | F12  | RGS1 16     | Unknown     | Unknown  |        |
| <input checked="" type="checkbox"/> | G1   | blank       | Unknown     | Negative |        |
| <input checked="" type="checkbox"/> | G2   | blank       | Unknown     | Negative |        |
| <input checked="" type="checkbox"/> | G3   | blank       | Unknown     | Negative |        |
| <input checked="" type="checkbox"/> | G4   | blank       | Unknown     | Negative |        |
| <input checked="" type="checkbox"/> | G5   | blank       | Unknown     | Negative |        |
| <input checked="" type="checkbox"/> | G6   | blank       | Unknown     | Negative |        |
| <input checked="" type="checkbox"/> | G7   | blank       | Unknown     | Negative |        |
| <input checked="" type="checkbox"/> | G8   | blank       | Unknown     | Negative |        |
| <input checked="" type="checkbox"/> | G9   | blank       | Unknown     | Negative |        |
| <input checked="" type="checkbox"/> | G10  | blank       | Unknown     | Negative |        |
| <input checked="" type="checkbox"/> | G11  | blank       | Unknown     | Negative |        |
| <input checked="" type="checkbox"/> | G12  | blank       | Unknown     | Negative |        |
| <input checked="" type="checkbox"/> | H1   | blank       | Unknown     | Negative |        |
| <input checked="" type="checkbox"/> | H2   | blank       | Unknown     | Negative |        |
| <input checked="" type="checkbox"/> | H3   | blank       | Unknown     | Negative |        |
| <input checked="" type="checkbox"/> | H4   | blank       | Unknown     | Negative |        |
| <input checked="" type="checkbox"/> | H5   | blank       | Unknown     | Negative |        |
| <input checked="" type="checkbox"/> | H6   | blank       | Unknown     | Negative |        |
| <input checked="" type="checkbox"/> | H7   | blank       | Unknown     | Negative |        |
| <input checked="" type="checkbox"/> | H8   | blank       | Unknown     | Negative |        |
| <input checked="" type="checkbox"/> | H9   | blank       | Unknown     | Negative |        |
| <input checked="" type="checkbox"/> | H10  | blank       | Unknown     | Negative |        |
| <input checked="" type="checkbox"/> | H11  | blank       | Unknown     | Negative |        |
| <input checked="" type="checkbox"/> | H12  | blank       | Unknown     | Negative |        |

## Group 1

| Inc                                 | Pos | Sample Name | Sample Type |
|-------------------------------------|-----|-------------|-------------|
| <input checked="" type="checkbox"/> | C2  | RGS1 9      | Unknown     |
| <input checked="" type="checkbox"/> | C3  | RGS1 9      | Unknown     |
| <input checked="" type="checkbox"/> | C5  | RGS1 10     | Unknown     |
| <input checked="" type="checkbox"/> | C7  | RGS1 1      | Unknown     |
| <input checked="" type="checkbox"/> | C8  | RGS1 1      | Unknown     |
| <input checked="" type="checkbox"/> | C9  | RGS1 1      | Unknown     |
| <input checked="" type="checkbox"/> | C10 | RGS1 12     | Unknown     |
| <input checked="" type="checkbox"/> | C11 | RGS1 12     | Unknown     |
| <input checked="" type="checkbox"/> | F1  | RGS1 13     | Unknown     |



| Group 1                             |     |             |             |
|-------------------------------------|-----|-------------|-------------|
| Inc                                 | Pos | Sample Name | Sample Type |
| <input checked="" type="checkbox"/> | F2  | RGS1 13     | Unknown     |
| <input checked="" type="checkbox"/> | F3  | RGS1 13     | Unknown     |
| <input checked="" type="checkbox"/> | F4  | RGS1 14     | Unknown     |
| <input checked="" type="checkbox"/> | F5  | RGS1 14     | Unknown     |
| <input checked="" type="checkbox"/> | F6  | RGS1 14     | Unknown     |
| <input checked="" type="checkbox"/> | F7  | RGS1 15     | Unknown     |
| <input checked="" type="checkbox"/> | F8  | RGS1 15     | Unknown     |
| <input checked="" type="checkbox"/> | F9  | RGS1 15     | Unknown     |
| Group 2                             |     |             |             |
| Inc                                 | Pos | Sample Name | Sample Type |
| <input checked="" type="checkbox"/> | A1  | GAPDH 9     | Unknown     |
| <input checked="" type="checkbox"/> | A4  | GAPDH 10    | Unknown     |
| <input checked="" type="checkbox"/> | A6  | GAPDH 10    | Unknown     |
| <input checked="" type="checkbox"/> | A9  | GAPDH 11    | Unknown     |
| <input checked="" type="checkbox"/> | A12 | GAPDH 12    | Unknown     |
| <input checked="" type="checkbox"/> | D1  | GAPDH 13    | Unknown     |
| <input checked="" type="checkbox"/> | D2  | GAPDH 13    | Unknown     |
| <input checked="" type="checkbox"/> | D3  | GAPDH 13    | Unknown     |
| <input checked="" type="checkbox"/> | D4  | GAPDH 14    | Unknown     |
| <input checked="" type="checkbox"/> | D5  | GAPDH 14    | Unknown     |
| <input checked="" type="checkbox"/> | D6  | GAPDH 14    | Unknown     |
| <input checked="" type="checkbox"/> | D8  | GAPDH 15    | Unknown     |
| <input checked="" type="checkbox"/> | D9  | GAPDH 15    | Unknown     |
| <input checked="" type="checkbox"/> | D10 | GAPDH 16    | Unknown     |
| <input checked="" type="checkbox"/> | D11 | GAPDH 16    | Unknown     |
| <input checked="" type="checkbox"/> | D12 | GAPDH 16    | Unknown     |
| Group 3                             |     |             |             |
| Inc                                 | Pos | Sample Name | Sample Type |
| <input checked="" type="checkbox"/> | B3  | FCER1A 9    | Unknown     |
| <input checked="" type="checkbox"/> | B10 | FCER1A 12   | Unknown     |
| <input checked="" type="checkbox"/> | B11 | FCER1A 12   | Unknown     |
| <input checked="" type="checkbox"/> | B12 | FCER1A 12   | Unknown     |
| <input checked="" type="checkbox"/> | E4  | FCER1A 14   | Unknown     |
| <input checked="" type="checkbox"/> | E6  | FCER1A 14   | Unknown     |
| <input checked="" type="checkbox"/> | E8  | FCER1A 15   | Unknown     |
| <input checked="" type="checkbox"/> | E9  | FCER1A 15   | Unknown     |
| <input checked="" type="checkbox"/> | E11 | FCER1A 16   | Unknown     |
| <input checked="" type="checkbox"/> | E12 | FCER1A 16   | Unknown     |

| <b>Group</b> 4                      |     |             |             |
|-------------------------------------|-----|-------------|-------------|
| Inc                                 | Pos | Sample Name | Sample Type |
| <input checked="" type="checkbox"/> | B1  | FCER1A 9    | Unknown     |
| <input checked="" type="checkbox"/> | B2  | FCER1A 9    | Unknown     |
| <input checked="" type="checkbox"/> | B9  | FCER1A 11   | Unknown     |
| <input checked="" type="checkbox"/> | E2  | FCER1A 13   | Unknown     |
| <input checked="" type="checkbox"/> | E5  | FCER1A 14   | Unknown     |
| <b>Group</b> 5                      |     |             |             |
| Inc                                 | Pos | Sample Name | Sample Type |
| <input checked="" type="checkbox"/> | A5  | GAPDH 10    | Unknown     |
| <input checked="" type="checkbox"/> | A7  | GAPDH 11    | Unknown     |
| <input checked="" type="checkbox"/> | A11 | GAPDH 12    | Unknown     |
| <input checked="" type="checkbox"/> | B4  | FCER1A 10   | Unknown     |
| <b>Group</b> 6                      |     |             |             |
| Inc                                 | Pos | Sample Name | Sample Type |
| <input checked="" type="checkbox"/> | B6  | FCER1A 10   | Unknown     |
| <input checked="" type="checkbox"/> | B7  | FCER1A 11   | Unknown     |
| <input checked="" type="checkbox"/> | E1  | FCER1A 13   | Unknown     |
| <b>Group</b> Negative               |     |             |             |
| Inc                                 | Pos | Sample Name | Sample Type |
| <input checked="" type="checkbox"/> | A3  | GAPDH 9     | Unknown     |
| <input checked="" type="checkbox"/> | C4  | RGS1 10     | Unknown     |
| <input checked="" type="checkbox"/> | G1  | blank       | Unknown     |
| <input checked="" type="checkbox"/> | G2  | blank       | Unknown     |
| <input checked="" type="checkbox"/> | G3  | blank       | Unknown     |
| <input checked="" type="checkbox"/> | G4  | blank       | Unknown     |
| <input checked="" type="checkbox"/> | G5  | blank       | Unknown     |
| <input checked="" type="checkbox"/> | G6  | blank       | Unknown     |
| <input checked="" type="checkbox"/> | G7  | blank       | Unknown     |
| <input checked="" type="checkbox"/> | G8  | blank       | Unknown     |
| <input checked="" type="checkbox"/> | G9  | blank       | Unknown     |
| <input checked="" type="checkbox"/> | G10 | blank       | Unknown     |
| <input checked="" type="checkbox"/> | G11 | blank       | Unknown     |
| <input checked="" type="checkbox"/> | G12 | blank       | Unknown     |
| <input checked="" type="checkbox"/> | H1  | blank       | Unknown     |
| <input checked="" type="checkbox"/> | H2  | blank       | Unknown     |
| <input checked="" type="checkbox"/> | H3  | blank       | Unknown     |
| <input checked="" type="checkbox"/> | H4  | blank       | Unknown     |
| <input checked="" type="checkbox"/> | H5  | blank       | Unknown     |

| Group Negative                      |     |             |             |
|-------------------------------------|-----|-------------|-------------|
| Inc                                 | Pos | Sample Name | Sample Type |
| <input checked="" type="checkbox"/> | H6  | blank       | Unknown     |
| <input checked="" type="checkbox"/> | H7  | blank       | Unknown     |
| <input checked="" type="checkbox"/> | H8  | blank       | Unknown     |
| <input checked="" type="checkbox"/> | H9  | blank       | Unknown     |
| <input checked="" type="checkbox"/> | H10 | blank       | Unknown     |
| <input checked="" type="checkbox"/> | H11 | blank       | Unknown     |
| <input checked="" type="checkbox"/> | H12 | blank       | Unknown     |

| Group Unknown                       |     |             |             |
|-------------------------------------|-----|-------------|-------------|
| Inc                                 | Pos | Sample Name | Sample Type |
| <input checked="" type="checkbox"/> | A2  | GAPDH 9     | Unknown     |
| <input checked="" type="checkbox"/> | A8  | GAPDH 11    | Unknown     |
| <input checked="" type="checkbox"/> | A10 | GAPDH 12    | Unknown     |
| <input checked="" type="checkbox"/> | B5  | FCER1A 10   | Unknown     |
| <input checked="" type="checkbox"/> | B8  | FCER1A 11   | Unknown     |
| <input checked="" type="checkbox"/> | C1  | RGS1 9      | Unknown     |
| <input checked="" type="checkbox"/> | C6  | RGS1 10     | Unknown     |
| <input checked="" type="checkbox"/> | C12 | RGS1 12     | Unknown     |
| <input checked="" type="checkbox"/> | D7  | GAPDH 15    | Unknown     |
| <input checked="" type="checkbox"/> | E3  | FCER1A 13   | Unknown     |
| <input checked="" type="checkbox"/> | E7  | FCER1A 15   | Unknown     |
| <input checked="" type="checkbox"/> | E10 | FCER1A 16   | Unknown     |
| <input checked="" type="checkbox"/> | F10 | RGS1 16     | Unknown     |
| <input checked="" type="checkbox"/> | F11 | RGS1 16     | Unknown     |
| <input checked="" type="checkbox"/> | F12 | RGS1 16     | Unknown     |

**Melting Curves**

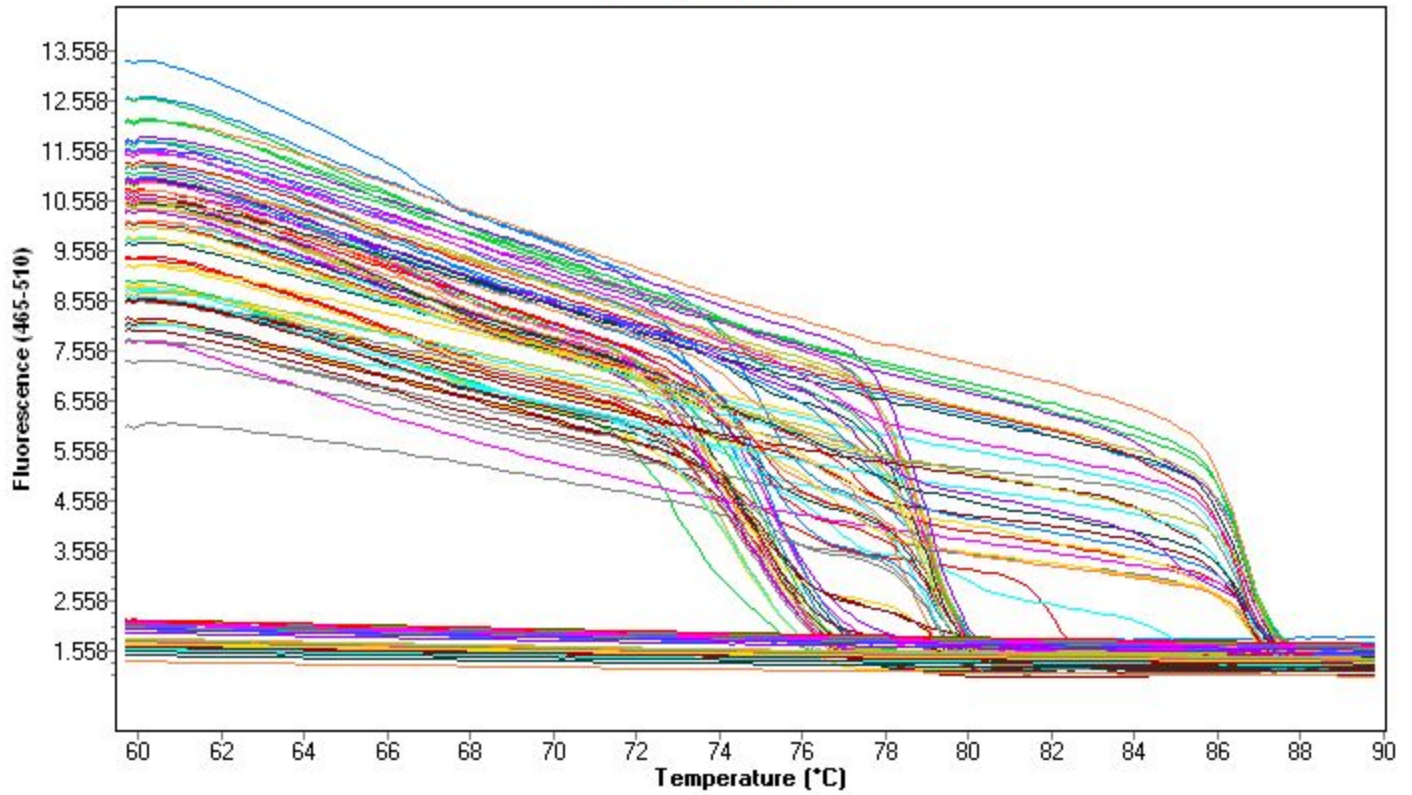

**Normalized Melting Curves**

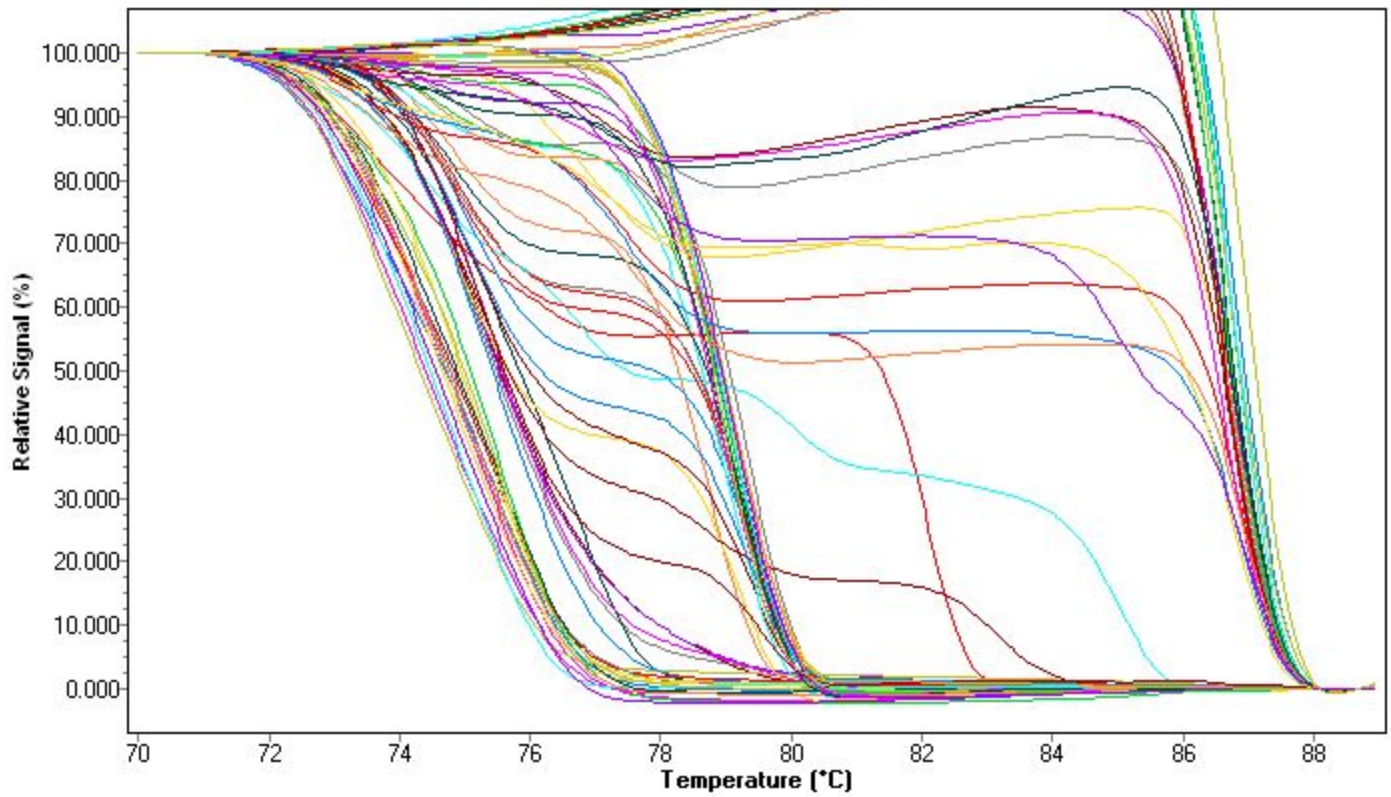

**Normalized and Shifted Melting Curves**

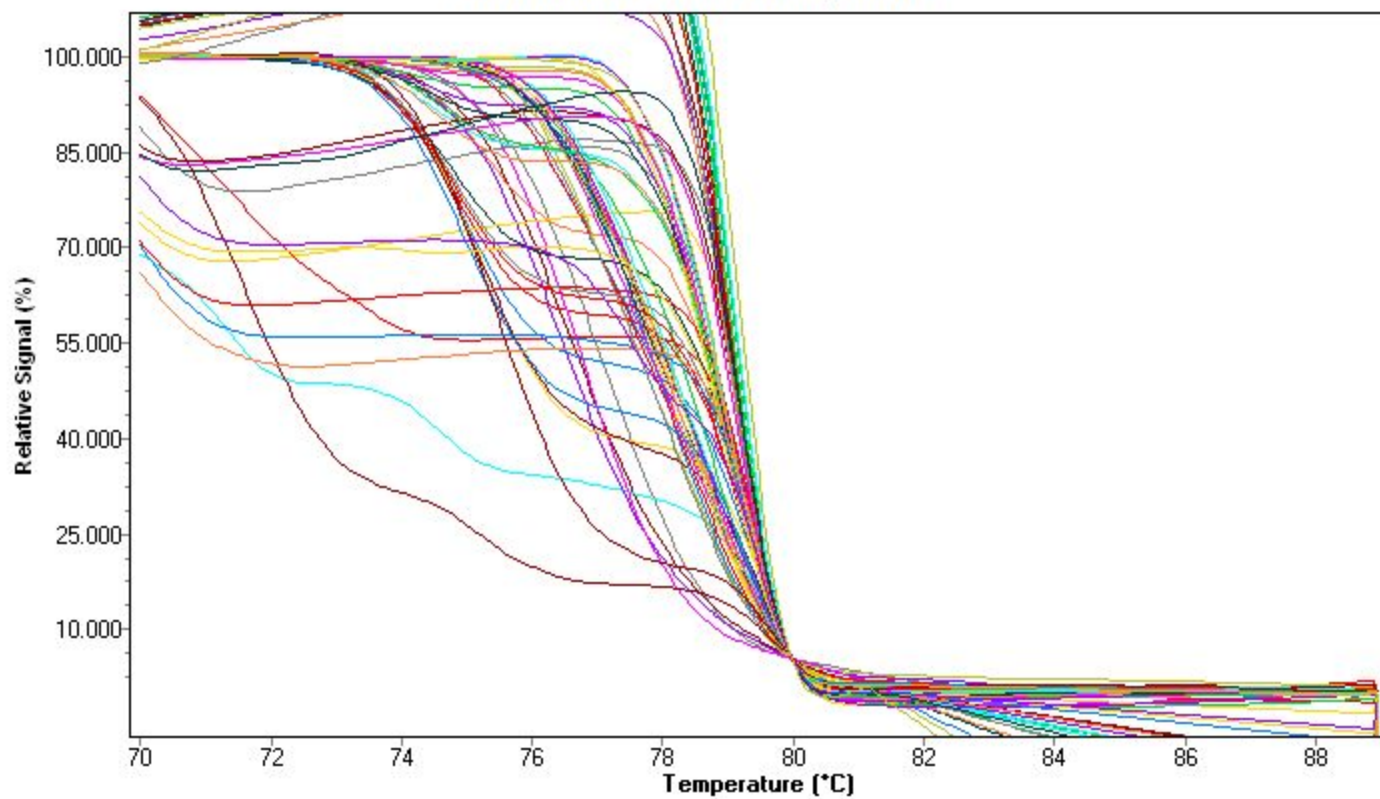

**Normalized and Temp-Shifted Difference Plot**

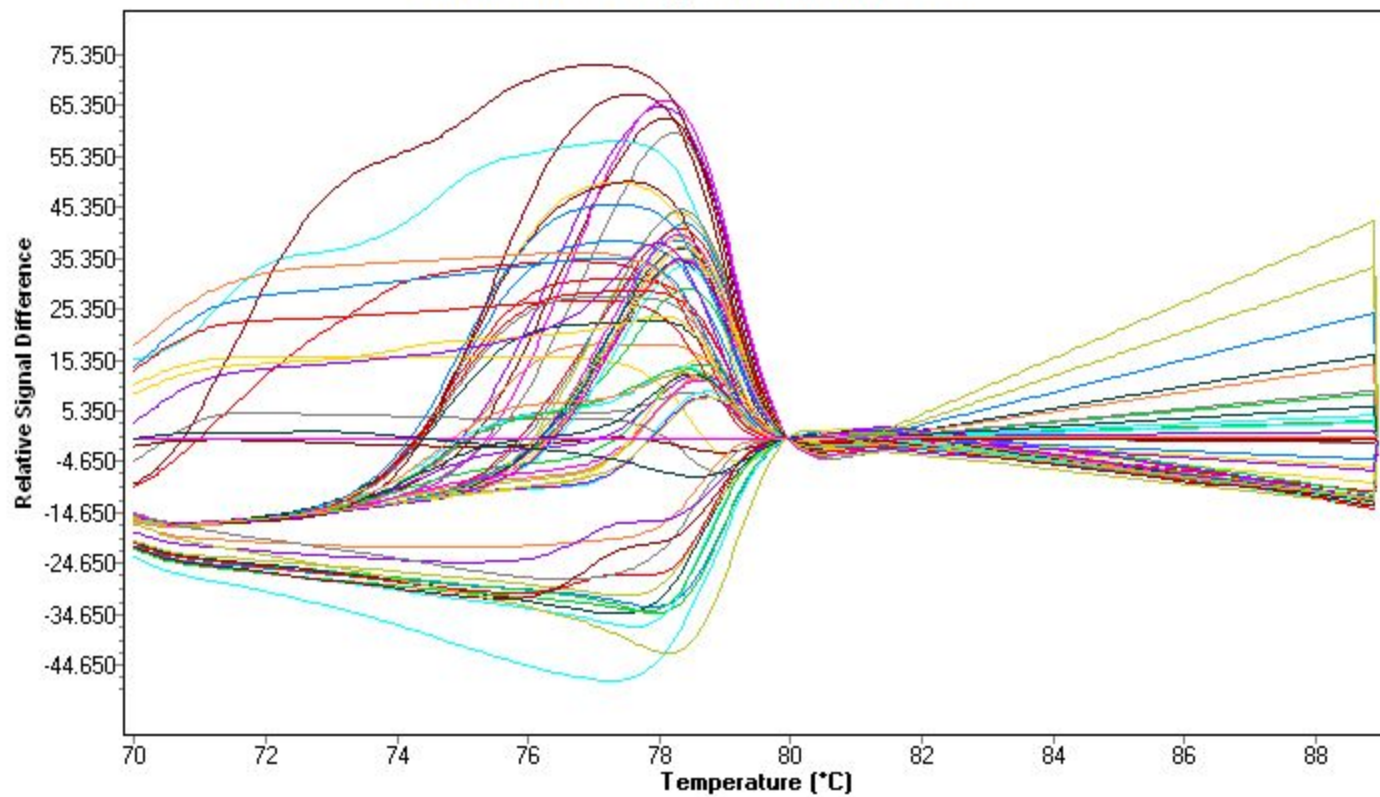

Analysis Notes

## Melt Curve Genotyping for All Samples (Melt Curve Genotyping)

|                |            |                    |       |
|----------------|------------|--------------------|-------|
| Channel        | 465-510    | Color Compensation | Off   |
| Program Name   | Program    |                    |       |
| Std's Settings | Auto-Group |                    |       |
| Sensitivity    | Normal     | Temp Range         | 62-86 |
| Score          | 0.7        | Res                | 0.1   |

|             |             |
|-------------|-------------|
| Subset Name | All Samples |
|-------------|-------------|

### Results

| Inc                                 | Pos. | Sample Name | Sample Type | Group   | Score | Resolution | Status |
|-------------------------------------|------|-------------|-------------|---------|-------|------------|--------|
| <input checked="" type="checkbox"/> | A1   | GAPDH 9     | Unknown     | 1       | 0.99  | 0.51       |        |
| <input checked="" type="checkbox"/> | A2   | GAPDH 9     | Unknown     | 6       | 1.00  | 0.47       |        |
| <input checked="" type="checkbox"/> | A3   | GAPDH 9     | Unknown     | 1       | 0.98  | 0.78       |        |
| <input checked="" type="checkbox"/> | A4   | GAPDH 10    | Unknown     | 1       | 0.98  | 0.55       |        |
| <input checked="" type="checkbox"/> | A5   | GAPDH 10    | Unknown     | 1       | 0.98  | 0.42       |        |
| <input checked="" type="checkbox"/> | A6   | GAPDH 10    | Unknown     | 1       | 0.98  | 0.57       |        |
| <input checked="" type="checkbox"/> | A7   | GAPDH 11    | Unknown     | 1       | 0.98  | 0.36       |        |
| <input checked="" type="checkbox"/> | A8   | GAPDH 11    | Unknown     | 6       | 0.82  | 0.13       |        |
| <input checked="" type="checkbox"/> | A9   | GAPDH 11    | Unknown     | 1       | 0.98  | 0.36       |        |
| <input checked="" type="checkbox"/> | A10  | GAPDH 12    | Unknown     | 4       | 0.85  | 0.22       |        |
| <input checked="" type="checkbox"/> | A11  | GAPDH 12    | Unknown     | 1       | 0.96  | 0.31       |        |
| <input checked="" type="checkbox"/> | A12  | GAPDH 12    | Unknown     | 1       | 0.99  | 0.67       |        |
| <input checked="" type="checkbox"/> | B1   | FCER1A 9    | Unknown     | 4       | 0.97  | 0.42       |        |
| <input checked="" type="checkbox"/> | B2   | FCER1A 9    | Unknown     | 4       | 1.00  | 0.51       |        |
| <input checked="" type="checkbox"/> | B3   | FCER1A 9    | Unknown     | 3       | 0.98  | 0.60       |        |
| <input checked="" type="checkbox"/> | B4   | FCER1A 10   | Unknown     | 1       | 0.97  | 0.43       |        |
| <input checked="" type="checkbox"/> | B5   | FCER1A 10   | Unknown     | 3       | 0.81  | 0.17       |        |
| <input checked="" type="checkbox"/> | B6   | FCER1A 10   | Unknown     | 4       | 0.87  | 0.20       |        |
| <input checked="" type="checkbox"/> | B7   | FCER1A 11   | Unknown     | 4       | 0.86  | 0.16       |        |
| <input checked="" type="checkbox"/> | B8   | FCER1A 11   | Unknown     | 3       | 0.90  | 0.36       |        |
| <input checked="" type="checkbox"/> | B9   | FCER1A 11   | Unknown     | 4       | 0.95  | 0.43       |        |
| <input checked="" type="checkbox"/> | B10  | FCER1A 12   | Unknown     | 3       | 0.99  | 0.68       |        |
| <input checked="" type="checkbox"/> | B11  | FCER1A 12   | Unknown     | 3       | 0.96  | 0.51       |        |
| <input checked="" type="checkbox"/> | B12  | FCER1A 12   | Unknown     | 3       | 0.99  | 0.69       |        |
| <input checked="" type="checkbox"/> | C1   | RGS1 9      | Unknown     | 2       | 0.99  | 0.36       |        |
| <input checked="" type="checkbox"/> | C2   | RGS1 9      | Unknown     | Unknown | 0.77  | 0.05       |        |
| <input checked="" type="checkbox"/> | C3   | RGS1 9      | Unknown     | 2       | 0.99  | 0.42       |        |
| <input checked="" type="checkbox"/> | C4   | RGS1 10     | Unknown     | 2       | 0.90  | 0.47       |        |
| <input checked="" type="checkbox"/> | C5   | RGS1 10     | Unknown     | 5       | 0.94  | 0.18       |        |
| <input checked="" type="checkbox"/> | C6   | RGS1 10     | Unknown     | 5       | 0.84  | 0.14       |        |
| <input checked="" type="checkbox"/> | C7   | RGS1 1      | Unknown     | Unknown | 0.90  | 0.03       |        |

## Results

| Inc                                 | Pos. | Sample Name | Sample Type | Group   | Score | Resolution | Status |
|-------------------------------------|------|-------------|-------------|---------|-------|------------|--------|
| <input checked="" type="checkbox"/> | C8   | RGS1 1      | Unknown     | 2       | 0.99  | 0.43       |        |
| <input checked="" type="checkbox"/> | C9   | RGS1 1      | Unknown     | 2       | 1.00  | 0.37       |        |
| <input checked="" type="checkbox"/> | C10  | RGS1 12     | Unknown     | 2       | 0.98  | 0.26       |        |
| <input checked="" type="checkbox"/> | C11  | RGS1 12     | Unknown     | 2       | 0.96  | 0.20       |        |
| <input checked="" type="checkbox"/> | C12  | RGS1 12     | Unknown     | 2       | 0.98  | 0.28       |        |
| <input checked="" type="checkbox"/> | D1   | GAPDH 13    | Unknown     | 1       | 0.99  | 0.46       |        |
| <input checked="" type="checkbox"/> | D2   | GAPDH 13    | Unknown     | 1       | 0.99  | 0.51       |        |
| <input checked="" type="checkbox"/> | D3   | GAPDH 13    | Unknown     | 1       | 0.98  | 0.47       |        |
| <input checked="" type="checkbox"/> | D4   | GAPDH 14    | Unknown     | 1       | 0.99  | 0.61       |        |
| <input checked="" type="checkbox"/> | D5   | GAPDH 14    | Unknown     | 1       | 0.98  | 0.52       |        |
| <input checked="" type="checkbox"/> | D6   | GAPDH 14    | Unknown     | 1       | 0.97  | 0.53       |        |
| <input checked="" type="checkbox"/> | D7   | GAPDH 15    | Unknown     | Unknown | 0.72  | 0.03       |        |
| <input checked="" type="checkbox"/> | D8   | GAPDH 15    | Unknown     | 1       | 0.99  | 0.63       |        |
| <input checked="" type="checkbox"/> | D9   | GAPDH 15    | Unknown     | 1       | 1.00  | 0.51       |        |
| <input checked="" type="checkbox"/> | D10  | GAPDH 16    | Unknown     | 1       | 0.99  | 0.55       |        |
| <input checked="" type="checkbox"/> | D11  | GAPDH 16    | Unknown     | 1       | 0.99  | 0.58       |        |
| <input checked="" type="checkbox"/> | D12  | GAPDH 16    | Unknown     | 1       | 0.98  | 0.50       |        |
| <input checked="" type="checkbox"/> | E1   | FCER1A 13   | Unknown     | 4       | 0.90  | 0.25       |        |
| <input checked="" type="checkbox"/> | E2   | FCER1A 13   | Unknown     | 4       | 0.99  | 0.49       |        |
| <input checked="" type="checkbox"/> | E3   | FCER1A 13   | Unknown     | Unknown | 0.77  | 0.07       |        |
| <input checked="" type="checkbox"/> | E4   | FCER1A 14   | Unknown     | 3       | 1.00  | 0.65       |        |
| <input checked="" type="checkbox"/> | E5   | FCER1A 14   | Unknown     | 4       | 0.96  | 0.49       |        |
| <input checked="" type="checkbox"/> | E6   | FCER1A 14   | Unknown     | 3       | 0.98  | 0.68       |        |
| <input checked="" type="checkbox"/> | E7   | FCER1A 15   | Unknown     | 1       | 0.91  | 0.28       |        |
| <input checked="" type="checkbox"/> | E8   | FCER1A 15   | Unknown     | 3       | 0.98  | 0.68       |        |
| <input checked="" type="checkbox"/> | E9   | FCER1A 15   | Unknown     | 3       | 0.95  | 0.47       |        |
| <input checked="" type="checkbox"/> | E10  | FCER1A 16   | Unknown     | 3       | 0.81  | 0.16       |        |
| <input checked="" type="checkbox"/> | E11  | FCER1A 16   | Unknown     | 3       | 0.99  | 0.68       |        |
| <input checked="" type="checkbox"/> | E12  | FCER1A 16   | Unknown     | 3       | 0.98  | 0.70       |        |
| <input checked="" type="checkbox"/> | F1   | RGS1 13     | Unknown     | 5       | 0.83  | 0.12       |        |
| <input checked="" type="checkbox"/> | F2   | RGS1 13     | Unknown     | 2       | 0.98  | 0.33       |        |
| <input checked="" type="checkbox"/> | F3   | RGS1 13     | Unknown     | 2       | 0.99  | 0.43       |        |
| <input checked="" type="checkbox"/> | F4   | RGS1 14     | Unknown     | Unknown | 0.88  | 0.01       |        |
| <input checked="" type="checkbox"/> | F5   | RGS1 14     | Unknown     | 2       | 0.97  | 0.31       |        |
| <input checked="" type="checkbox"/> | F6   | RGS1 14     | Unknown     | 5       | 0.88  | 0.10       |        |
| <input checked="" type="checkbox"/> | F7   | RGS1 15     | Unknown     | 2       | 0.98  | 0.38       |        |
| <input checked="" type="checkbox"/> | F8   | RGS1 15     | Unknown     | 2       | 0.97  | 0.49       |        |
| <input checked="" type="checkbox"/> | F9   | RGS1 15     | Unknown     | Unknown | 0.85  |            |        |

## Results

| Inc                                 | Pos. | Sample Name | Sample Type | Group    | Score | Resolution | Status |
|-------------------------------------|------|-------------|-------------|----------|-------|------------|--------|
| <input checked="" type="checkbox"/> | F10  | RGS1 16     | Unknown     | Unknown  | 0.79  | 0.09       |        |
| <input checked="" type="checkbox"/> | F11  | RGS1 16     | Unknown     | 5        | 1.00  | 0.37       |        |
| <input checked="" type="checkbox"/> | F12  | RGS1 16     | Unknown     | 2        | 0.98  | 0.34       |        |
| <input checked="" type="checkbox"/> | G1   | blank       | Unknown     | Negative | 1.00  | 1.00       |        |
| <input checked="" type="checkbox"/> | G2   | blank       | Unknown     | Negative | 1.00  | 1.00       |        |
| <input checked="" type="checkbox"/> | G3   | blank       | Unknown     | Negative | 1.00  | 1.00       |        |
| <input checked="" type="checkbox"/> | G4   | blank       | Unknown     | Negative | 1.00  | 1.00       |        |
| <input checked="" type="checkbox"/> | G5   | blank       | Unknown     | Negative | 1.00  | 1.00       |        |
| <input checked="" type="checkbox"/> | G6   | blank       | Unknown     | Negative | 1.00  | 1.00       |        |
| <input checked="" type="checkbox"/> | G7   | blank       | Unknown     | Negative | 1.00  | 1.00       |        |
| <input checked="" type="checkbox"/> | G8   | blank       | Unknown     | Negative | 1.00  | 1.00       |        |
| <input checked="" type="checkbox"/> | G9   | blank       | Unknown     | Negative | 1.00  | 1.00       |        |
| <input checked="" type="checkbox"/> | G10  | blank       | Unknown     | Negative | 1.00  | 1.00       |        |
| <input checked="" type="checkbox"/> | G11  | blank       | Unknown     | Negative | 1.00  | 1.00       |        |
| <input checked="" type="checkbox"/> | G12  | blank       | Unknown     | Negative | 1.00  | 1.00       |        |
| <input checked="" type="checkbox"/> | H1   | blank       | Unknown     | Negative | 1.00  | 1.00       |        |
| <input checked="" type="checkbox"/> | H2   | blank       | Unknown     | Negative | 1.00  | 1.00       |        |
| <input checked="" type="checkbox"/> | H3   | blank       | Unknown     | Negative | 1.00  | 1.00       |        |
| <input checked="" type="checkbox"/> | H4   | blank       | Unknown     | Negative | 1.00  | 1.00       |        |
| <input checked="" type="checkbox"/> | H5   | blank       | Unknown     | Negative | 1.00  | 1.00       |        |
| <input checked="" type="checkbox"/> | H6   | blank       | Unknown     | Negative | 1.00  | 1.00       |        |
| <input checked="" type="checkbox"/> | H7   | blank       | Unknown     | Negative | 1.00  | 1.00       |        |
| <input checked="" type="checkbox"/> | H8   | blank       | Unknown     | Negative | 1.00  | 1.00       |        |
| <input checked="" type="checkbox"/> | H9   | blank       | Unknown     | Negative | 1.00  | 1.00       |        |
| <input checked="" type="checkbox"/> | H10  | blank       | Unknown     | Negative | 1.00  | 1.00       |        |
| <input checked="" type="checkbox"/> | H11  | blank       | Unknown     | Negative | 1.00  | 1.00       |        |
| <input checked="" type="checkbox"/> | H12  | blank       | Unknown     | Negative | 1.00  | 1.00       |        |

## Group 1

| Inc                                 | Pos | Sample Name | Sample Type | Score | Resolution | Status |
|-------------------------------------|-----|-------------|-------------|-------|------------|--------|
| <input checked="" type="checkbox"/> | A1  | GAPDH 9     | Unknown     | 0.99  | 0.51       |        |
| <input checked="" type="checkbox"/> | A3  | GAPDH 9     | Unknown     | 0.98  | 0.78       |        |
| <input checked="" type="checkbox"/> | A4  | GAPDH 10    | Unknown     | 0.98  | 0.55       |        |
| <input checked="" type="checkbox"/> | A5  | GAPDH 10    | Unknown     | 0.98  | 0.42       |        |
| <input checked="" type="checkbox"/> | A6  | GAPDH 10    | Unknown     | 0.98  | 0.57       |        |
| <input checked="" type="checkbox"/> | A7  | GAPDH 11    | Unknown     | 0.98  | 0.36       |        |
| <input checked="" type="checkbox"/> | A9  | GAPDH 11    | Unknown     | 0.98  | 0.36       |        |
| <input checked="" type="checkbox"/> | A11 | GAPDH 12    | Unknown     | 0.96  | 0.31       |        |



| Group 1                             |     |             |             |       |            |        |
|-------------------------------------|-----|-------------|-------------|-------|------------|--------|
| Inc                                 | Pos | Sample Name | Sample Type | Score | Resolution | Status |
| <input checked="" type="checkbox"/> | A12 | GAPDH 12    | Unknown     | 0.99  | 0.67       |        |
| <input checked="" type="checkbox"/> | B4  | FCER1A 10   | Unknown     | 0.97  | 0.43       |        |
| <input checked="" type="checkbox"/> | D1  | GAPDH 13    | Unknown     | 0.99  | 0.46       |        |
| <input checked="" type="checkbox"/> | D2  | GAPDH 13    | Unknown     | 0.99  | 0.51       |        |
| <input checked="" type="checkbox"/> | D3  | GAPDH 13    | Unknown     | 0.98  | 0.47       |        |
| <input checked="" type="checkbox"/> | D4  | GAPDH 14    | Unknown     | 0.99  | 0.61       |        |
| <input checked="" type="checkbox"/> | D5  | GAPDH 14    | Unknown     | 0.98  | 0.52       |        |
| <input checked="" type="checkbox"/> | D6  | GAPDH 14    | Unknown     | 0.97  | 0.53       |        |
| <input checked="" type="checkbox"/> | D8  | GAPDH 15    | Unknown     | 0.99  | 0.63       |        |
| <input checked="" type="checkbox"/> | D9  | GAPDH 15    | Unknown     | 1.00  | 0.51       |        |
| <input checked="" type="checkbox"/> | D10 | GAPDH 16    | Unknown     | 0.99  | 0.55       |        |
| <input checked="" type="checkbox"/> | D11 | GAPDH 16    | Unknown     | 0.99  | 0.58       |        |
| <input checked="" type="checkbox"/> | D12 | GAPDH 16    | Unknown     | 0.98  | 0.50       |        |
| <input checked="" type="checkbox"/> | E7  | FCER1A 15   | Unknown     | 0.91  | 0.28       |        |

| Group 2                             |     |             |             |       |            |        |
|-------------------------------------|-----|-------------|-------------|-------|------------|--------|
| Inc                                 | Pos | Sample Name | Sample Type | Score | Resolution | Status |
| <input checked="" type="checkbox"/> | C1  | RGS1 9      | Unknown     | 0.99  | 0.36       |        |
| <input checked="" type="checkbox"/> | C3  | RGS1 9      | Unknown     | 0.99  | 0.42       |        |
| <input checked="" type="checkbox"/> | C4  | RGS1 10     | Unknown     | 0.90  | 0.47       |        |
| <input checked="" type="checkbox"/> | C8  | RGS1 1      | Unknown     | 0.99  | 0.43       |        |
| <input checked="" type="checkbox"/> | C9  | RGS1 1      | Unknown     | 1.00  | 0.37       |        |
| <input checked="" type="checkbox"/> | C10 | RGS1 12     | Unknown     | 0.98  | 0.26       |        |
| <input checked="" type="checkbox"/> | C11 | RGS1 12     | Unknown     | 0.96  | 0.20       |        |
| <input checked="" type="checkbox"/> | C12 | RGS1 12     | Unknown     | 0.98  | 0.28       |        |
| <input checked="" type="checkbox"/> | F2  | RGS1 13     | Unknown     | 0.98  | 0.33       |        |
| <input checked="" type="checkbox"/> | F3  | RGS1 13     | Unknown     | 0.99  | 0.43       |        |
| <input checked="" type="checkbox"/> | F5  | RGS1 14     | Unknown     | 0.97  | 0.31       |        |
| <input checked="" type="checkbox"/> | F7  | RGS1 15     | Unknown     | 0.98  | 0.38       |        |
| <input checked="" type="checkbox"/> | F8  | RGS1 15     | Unknown     | 0.97  | 0.49       |        |
| <input checked="" type="checkbox"/> | F12 | RGS1 16     | Unknown     | 0.98  | 0.34       |        |

| Group 3                             |     |             |             |       |            |        |
|-------------------------------------|-----|-------------|-------------|-------|------------|--------|
| Inc                                 | Pos | Sample Name | Sample Type | Score | Resolution | Status |
| <input checked="" type="checkbox"/> | B3  | FCER1A 9    | Unknown     | 0.98  | 0.60       |        |
| <input checked="" type="checkbox"/> | B5  | FCER1A 10   | Unknown     | 0.81  | 0.17       |        |
| <input checked="" type="checkbox"/> | B8  | FCER1A 11   | Unknown     | 0.90  | 0.36       |        |
| <input checked="" type="checkbox"/> | B10 | FCER1A 12   | Unknown     | 0.99  | 0.68       |        |

**Group 3**

| Inc                                 | Pos | Sample Name | Sample Type | Score | Resolution | Status |
|-------------------------------------|-----|-------------|-------------|-------|------------|--------|
| <input checked="" type="checkbox"/> | B11 | FCER1A 12   | Unknown     | 0.96  | 0.51       |        |
| <input checked="" type="checkbox"/> | B12 | FCER1A 12   | Unknown     | 0.99  | 0.69       |        |
| <input checked="" type="checkbox"/> | E4  | FCER1A 14   | Unknown     | 1.00  | 0.65       |        |
| <input checked="" type="checkbox"/> | E6  | FCER1A 14   | Unknown     | 0.98  | 0.68       |        |
| <input checked="" type="checkbox"/> | E8  | FCER1A 15   | Unknown     | 0.98  | 0.68       |        |
| <input checked="" type="checkbox"/> | E9  | FCER1A 15   | Unknown     | 0.95  | 0.47       |        |
| <input checked="" type="checkbox"/> | E10 | FCER1A 16   | Unknown     | 0.81  | 0.16       |        |
| <input checked="" type="checkbox"/> | E11 | FCER1A 16   | Unknown     | 0.99  | 0.68       |        |
| <input checked="" type="checkbox"/> | E12 | FCER1A 16   | Unknown     | 0.98  | 0.70       |        |

**Group 4**

| Inc                                 | Pos | Sample Name | Sample Type | Score | Resolution | Status |
|-------------------------------------|-----|-------------|-------------|-------|------------|--------|
| <input checked="" type="checkbox"/> | A10 | GAPDH 12    | Unknown     | 0.85  | 0.22       |        |
| <input checked="" type="checkbox"/> | B1  | FCER1A 9    | Unknown     | 0.97  | 0.42       |        |
| <input checked="" type="checkbox"/> | B2  | FCER1A 9    | Unknown     | 1.00  | 0.51       |        |
| <input checked="" type="checkbox"/> | B6  | FCER1A 10   | Unknown     | 0.87  | 0.20       |        |
| <input checked="" type="checkbox"/> | B7  | FCER1A 11   | Unknown     | 0.86  | 0.16       |        |
| <input checked="" type="checkbox"/> | B9  | FCER1A 11   | Unknown     | 0.95  | 0.43       |        |
| <input checked="" type="checkbox"/> | E1  | FCER1A 13   | Unknown     | 0.90  | 0.25       |        |
| <input checked="" type="checkbox"/> | E2  | FCER1A 13   | Unknown     | 0.99  | 0.49       |        |
| <input checked="" type="checkbox"/> | E5  | FCER1A 14   | Unknown     | 0.96  | 0.49       |        |

**Group 5**

| Inc                                 | Pos | Sample Name | Sample Type | Score | Resolution | Status |
|-------------------------------------|-----|-------------|-------------|-------|------------|--------|
| <input checked="" type="checkbox"/> | C5  | RGS1 10     | Unknown     | 0.94  | 0.18       |        |
| <input checked="" type="checkbox"/> | C6  | RGS1 10     | Unknown     | 0.84  | 0.14       |        |
| <input checked="" type="checkbox"/> | F1  | RGS1 13     | Unknown     | 0.83  | 0.12       |        |
| <input checked="" type="checkbox"/> | F6  | RGS1 14     | Unknown     | 0.88  | 0.10       |        |
| <input checked="" type="checkbox"/> | F11 | RGS1 16     | Unknown     | 1.00  | 0.37       |        |

**Group 6**

| Inc                                 | Pos | Sample Name | Sample Type | Score | Resolution | Status |
|-------------------------------------|-----|-------------|-------------|-------|------------|--------|
| <input checked="" type="checkbox"/> | A2  | GAPDH 9     | Unknown     | 1.00  | 0.47       |        |
| <input checked="" type="checkbox"/> | A8  | GAPDH 11    | Unknown     | 0.82  | 0.13       |        |

**Group Negative**

| Inc | Pos | Sample Name | Sample Type | Score | Resolution | Status |
|-----|-----|-------------|-------------|-------|------------|--------|
|-----|-----|-------------|-------------|-------|------------|--------|

| Group Negative                      |     |             |             |       |            |        |
|-------------------------------------|-----|-------------|-------------|-------|------------|--------|
| Inc                                 | Pos | Sample Name | Sample Type | Score | Resolution | Status |
| <input checked="" type="checkbox"/> | G1  | blank       | Unknown     | 1.00  | 1.00       |        |
| <input checked="" type="checkbox"/> | G2  | blank       | Unknown     | 1.00  | 1.00       |        |
| <input checked="" type="checkbox"/> | G3  | blank       | Unknown     | 1.00  | 1.00       |        |
| <input checked="" type="checkbox"/> | G4  | blank       | Unknown     | 1.00  | 1.00       |        |
| <input checked="" type="checkbox"/> | G5  | blank       | Unknown     | 1.00  | 1.00       |        |
| <input checked="" type="checkbox"/> | G6  | blank       | Unknown     | 1.00  | 1.00       |        |
| <input checked="" type="checkbox"/> | G7  | blank       | Unknown     | 1.00  | 1.00       |        |
| <input checked="" type="checkbox"/> | G8  | blank       | Unknown     | 1.00  | 1.00       |        |
| <input checked="" type="checkbox"/> | G9  | blank       | Unknown     | 1.00  | 1.00       |        |
| <input checked="" type="checkbox"/> | G10 | blank       | Unknown     | 1.00  | 1.00       |        |
| <input checked="" type="checkbox"/> | G11 | blank       | Unknown     | 1.00  | 1.00       |        |
| <input checked="" type="checkbox"/> | G12 | blank       | Unknown     | 1.00  | 1.00       |        |
| <input checked="" type="checkbox"/> | H1  | blank       | Unknown     | 1.00  | 1.00       |        |
| <input checked="" type="checkbox"/> | H2  | blank       | Unknown     | 1.00  | 1.00       |        |
| <input checked="" type="checkbox"/> | H3  | blank       | Unknown     | 1.00  | 1.00       |        |
| <input checked="" type="checkbox"/> | H4  | blank       | Unknown     | 1.00  | 1.00       |        |
| <input checked="" type="checkbox"/> | H5  | blank       | Unknown     | 1.00  | 1.00       |        |
| <input checked="" type="checkbox"/> | H6  | blank       | Unknown     | 1.00  | 1.00       |        |
| <input checked="" type="checkbox"/> | H7  | blank       | Unknown     | 1.00  | 1.00       |        |
| <input checked="" type="checkbox"/> | H8  | blank       | Unknown     | 1.00  | 1.00       |        |
| <input checked="" type="checkbox"/> | H9  | blank       | Unknown     | 1.00  | 1.00       |        |
| <input checked="" type="checkbox"/> | H10 | blank       | Unknown     | 1.00  | 1.00       |        |
| <input checked="" type="checkbox"/> | H11 | blank       | Unknown     | 1.00  | 1.00       |        |
| <input checked="" type="checkbox"/> | H12 | blank       | Unknown     | 1.00  | 1.00       |        |

| Group Unknown                       |     |             |             |       |            |        |
|-------------------------------------|-----|-------------|-------------|-------|------------|--------|
| Inc                                 | Pos | Sample Name | Sample Type | Score | Resolution | Status |
| <input checked="" type="checkbox"/> | C2  | RGS1 9      | Unknown     | 0.77  | 0.05       |        |
| <input checked="" type="checkbox"/> | C7  | RGS1 1      | Unknown     | 0.90  | 0.03       |        |
| <input checked="" type="checkbox"/> | D7  | GAPDH 15    | Unknown     | 0.72  | 0.03       |        |
| <input checked="" type="checkbox"/> | E3  | FCER1A 13   | Unknown     | 0.77  | 0.07       |        |
| <input checked="" type="checkbox"/> | F4  | RGS1 14     | Unknown     | 0.88  | 0.01       |        |
| <input checked="" type="checkbox"/> | F9  | RGS1 15     | Unknown     | 0.85  |            |        |
| <input checked="" type="checkbox"/> | F10 | RGS1 16     | Unknown     | 0.79  | 0.09       |        |

### Melting Curves

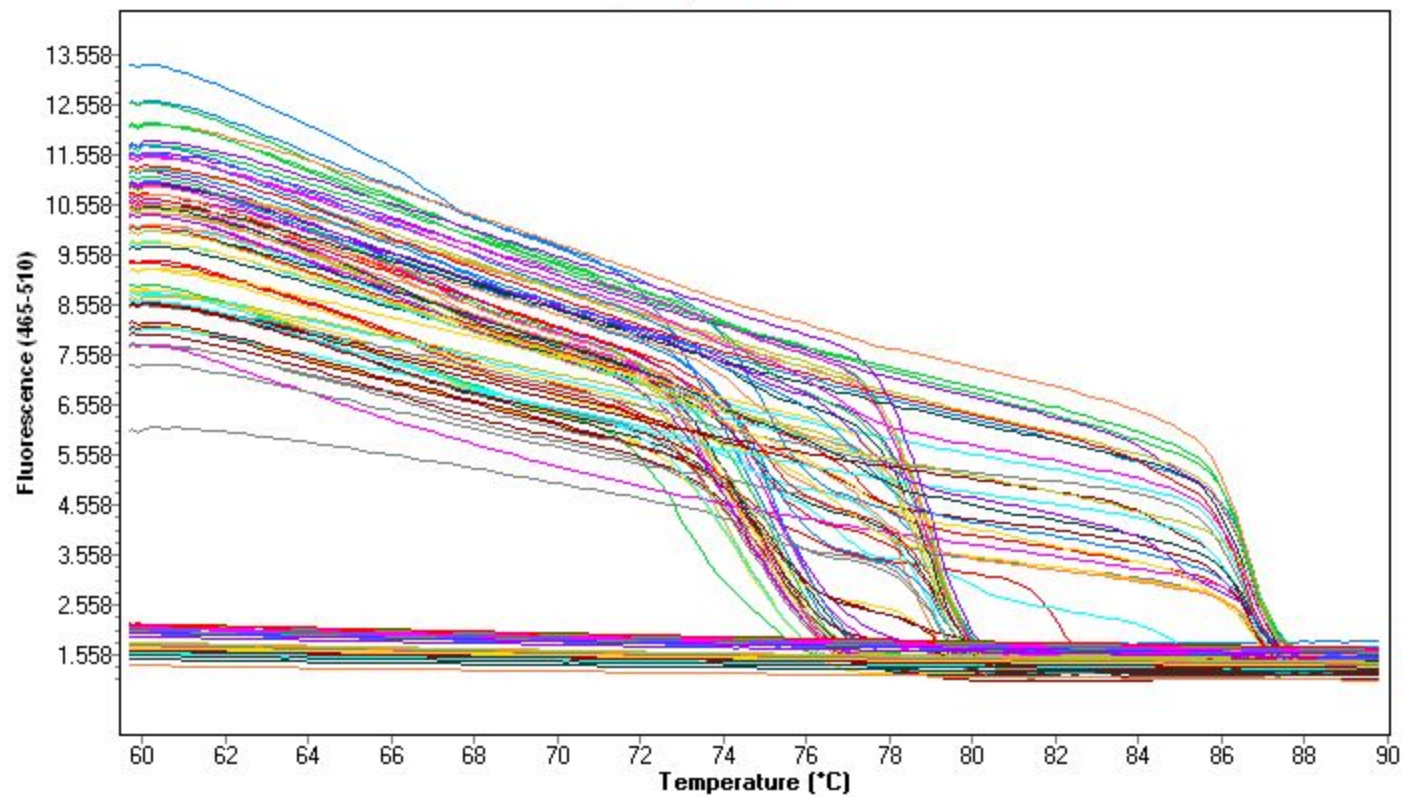

### Melting Peaks

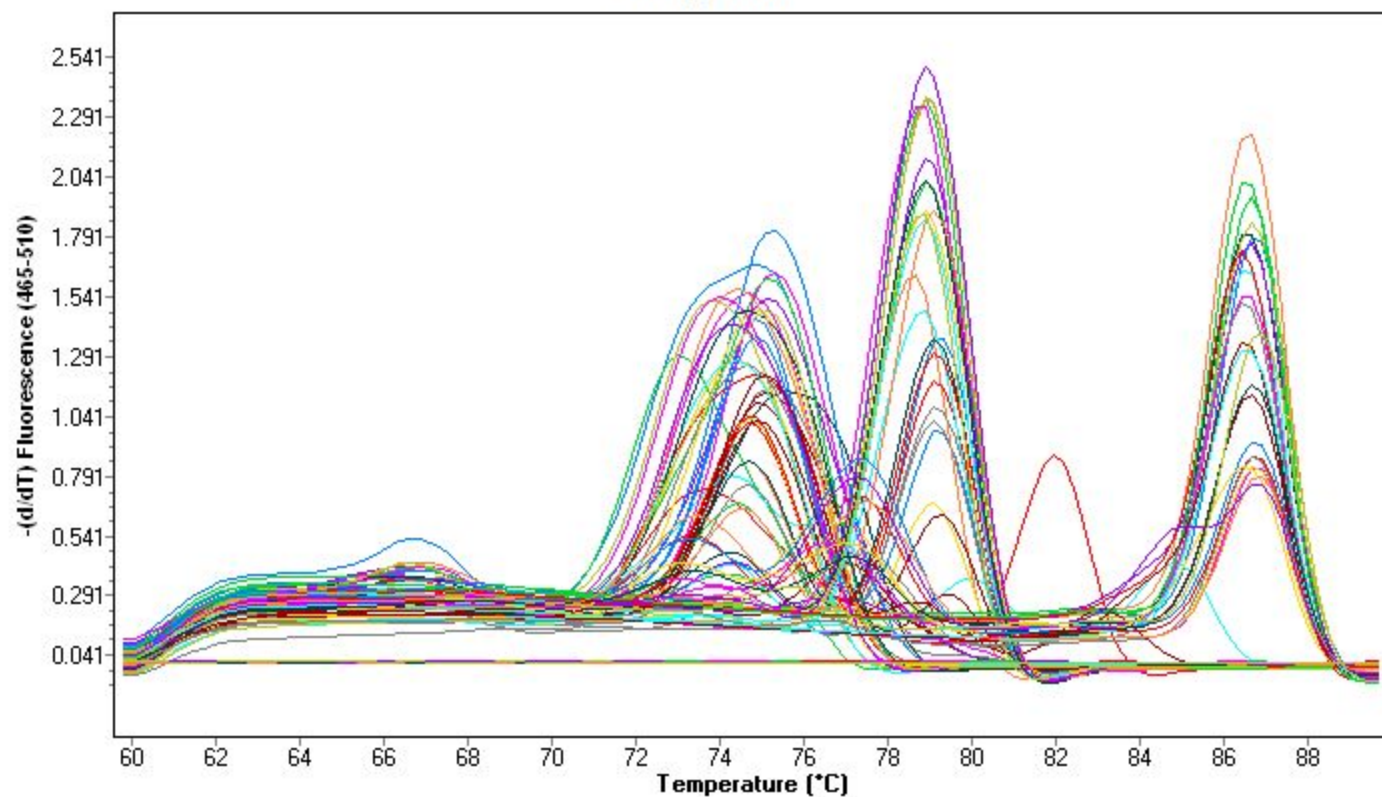

### Analysis Notes

## Tm Calling for All Samples (Tm Calling)

### Settings

|                |             |                    |          |
|----------------|-------------|--------------------|----------|
| Channel        | 465-510     | Color Compensation | Off      |
| Program        | Program     |                    |          |
| Show Shoulders | False       | Chemistry          | HybProbe |
|                |             | Max Peaks          | 2        |
| Subset Name    | All Samples |                    |          |

### Results

| Inc                                 | Pos | Sample Name | Peak 1 |      |       |        | Peak 2 |      |       |        | Status |
|-------------------------------------|-----|-------------|--------|------|-------|--------|--------|------|-------|--------|--------|
|                                     |     |             | Tm     | Area | Width | Height | Tm     | Area | Width | Height |        |
| <input checked="" type="checkbox"/> | A1  | GAPDH 9     | 74.51  | 8.16 | 4.45  | 1.84   |        |      |       |        |        |
| <input checked="" type="checkbox"/> | A2  | GAPDH 9     | 74.13  | 1.62 | 2.71  | 0.60   | 82.07  | 2.19 | 2.43  | 0.90   |        |
| <input checked="" type="checkbox"/> | A3  | GAPDH 9     | 65.16  | 2.14 | 8.23  | 0.26   | 73.33  | 4.89 | 3.82  | 1.28   |        |
| <input checked="" type="checkbox"/> | A4  | GAPDH 10    | 74.61  | 6.39 | 3.89  | 1.64   |        |      |       |        |        |
| <input checked="" type="checkbox"/> | A5  | GAPDH 10    | 75.42  | 3.77 | 3.26  | 1.16   |        |      |       |        |        |
| <input checked="" type="checkbox"/> | A6  | GAPDH 10    | 74.44  | 5.01 | 3.75  | 1.34   |        |      |       |        |        |
| <input checked="" type="checkbox"/> | A7  | GAPDH 11    | 75.17  | 3.84 | 3.58  | 1.07   |        |      |       |        |        |
| <input checked="" type="checkbox"/> | A8  | GAPDH 11    | 74.33  | 2.96 | 4.41  | 0.67   |        |      |       |        |        |
| <input checked="" type="checkbox"/> | A9  | GAPDH 11    | 75.90  | 4.38 | 3.57  | 1.23   |        |      |       |        |        |
| <input checked="" type="checkbox"/> | A10 | GAPDH 12    | 74.65  | 1.40 | 2.01  | 0.70   | 78.63  | 3.74 | 2.21  | 1.69   |        |
| <input checked="" type="checkbox"/> | A11 | GAPDH 12    | 75.17  | 5.34 | 3.65  | 1.47   |        |      |       |        |        |
| <input checked="" type="checkbox"/> | A12 | GAPDH 12    | 74.01  | 6.01 | 3.73  | 1.61   |        |      |       |        |        |
| <input checked="" type="checkbox"/> | B1  | FCER1A 9    | 74.95  | 3.22 | 2.32  | 1.39   | 79.30  | 3.41 | 2.29  | 1.49   |        |
| <input checked="" type="checkbox"/> | B2  | FCER1A 9    | 74.78  | 1.92 | 2.15  | 0.89   | 79.21  | 2.86 | 2.32  | 1.23   |        |
| <input checked="" type="checkbox"/> | B3  | FCER1A 9    | 78.90  | 5.87 | 2.39  | 2.46   |        |      |       |        |        |
| <input checked="" type="checkbox"/> | B4  | FCER1A 10   | 75.42  | 4.76 | 3.00  | 1.59   |        |      |       |        |        |
| <input checked="" type="checkbox"/> | B5  | FCER1A 10   | 74.57  | 0.55 | 2.28  | 0.24   | 79.20  | 2.54 | 2.26  | 1.13   |        |
| <input checked="" type="checkbox"/> | B6  | FCER1A 10   | 74.79  | 2.64 | 2.49  | 1.06   | 79.13  | 1.72 | 2.20  | 0.78   |        |
| <input checked="" type="checkbox"/> | B7  | FCER1A 11   | 75.06  | 2.71 | 2.58  | 1.05   | 79.32  | 1.68 | 2.35  | 0.72   |        |
| <input checked="" type="checkbox"/> | B8  | FCER1A 11   | 74.11  | 0.56 | 1.94  | 0.29   | 78.82  | 3.65 | 2.38  | 1.53   |        |
| <input checked="" type="checkbox"/> | B9  | FCER1A 11   | 74.66  | 1.58 | 2.21  | 0.72   | 79.17  | 3.29 | 2.31  | 1.42   |        |
| <input checked="" type="checkbox"/> | B10 | FCER1A 12   | 78.98  | 5.94 | 2.41  | 2.47   |        |      |       |        |        |
| <input checked="" type="checkbox"/> | B11 | FCER1A 12   | 74.10  | 0.38 | 1.63  | 0.23   | 78.96  | 5.19 | 2.35  | 2.21   |        |
| <input checked="" type="checkbox"/> | B12 | FCER1A 12   | 78.98  | 5.89 | 2.38  | 2.47   |        |      |       |        |        |
| <input checked="" type="checkbox"/> | C1  | RGS1 9      |        |      |       |        |        |      |       |        |        |
| <input checked="" type="checkbox"/> | C2  | RGS1 9      | 76.24  | 1.64 | 4.31  | 0.38   |        |      |       |        |        |
| <input checked="" type="checkbox"/> | C3  | RGS1 9      |        |      |       |        |        |      |       |        |        |
| <input checked="" type="checkbox"/> | C4  | RGS1 10     | 66.09  | 0.73 | 5.27  | 0.14   |        |      |       |        |        |
| <input checked="" type="checkbox"/> | C5  | RGS1 10     | 77.40  | 0.40 | 1.11  | 0.36   |        |      |       |        |        |

## Results

| Inc                                 | Pos | Sample Name | Peak 1 |      |       |        | Peak 2 |      |       |        | Status |
|-------------------------------------|-----|-------------|--------|------|-------|--------|--------|------|-------|--------|--------|
|                                     |     |             | Tm     | Area | Width | Height | Tm     | Area | Width | Height |        |
| <input checked="" type="checkbox"/> | C6  | RGS1 10     | 76.63  | 0.82 | 1.53  | 0.53   |        |      |       |        |        |
| <input checked="" type="checkbox"/> | C7  | RGS1 1      |        |      |       |        |        |      |       |        |        |
| <input checked="" type="checkbox"/> | C8  | RGS1 1      | 86.61  | 4.24 | 2.44  | 1.74   |        |      |       |        |        |
| <input checked="" type="checkbox"/> | C9  | RGS1 1      | 86.63  | 4.61 | 2.45  | 1.88   |        |      |       |        |        |
| <input checked="" type="checkbox"/> | C10 | RGS1 12     | 86.65  | 5.57 | 2.41  | 2.31   |        |      |       |        |        |
| <input checked="" type="checkbox"/> | C11 | RGS1 12     |        |      |       |        |        |      |       |        |        |
| <input checked="" type="checkbox"/> | C12 | RGS1 12     |        |      |       |        |        |      |       |        |        |
| <input checked="" type="checkbox"/> | D1  | GAPDH 13    | 66.18  | 3.24 | 8.45  | 0.38   | 75.17  | 6.60 | 3.66  | 1.80   |        |
| <input checked="" type="checkbox"/> | D2  | GAPDH 13    | 74.63  | 5.49 | 4.20  | 1.31   |        |      |       |        |        |
| <input checked="" type="checkbox"/> | D3  | GAPDH 13    | 75.22  | 5.47 | 3.32  | 1.65   |        |      |       |        |        |
| <input checked="" type="checkbox"/> | D4  | GAPDH 14    | 65.87  | 2.50 | 7.37  | 0.34   | 74.18  | 6.38 | 3.92  | 1.63   |        |
| <input checked="" type="checkbox"/> | D5  | GAPDH 14    | 74.61  | 5.09 | 3.88  | 1.31   |        |      |       |        |        |
| <input checked="" type="checkbox"/> | D6  | GAPDH 14    | 74.87  | 5.42 | 3.52  | 1.54   |        |      |       |        |        |
| <input checked="" type="checkbox"/> | D7  | GAPDH 15    | 65.50  | 2.10 | 9.22  | 0.23   | 74.91  | 3.29 | 3.36  | 0.98   |        |
| <input checked="" type="checkbox"/> | D8  | GAPDH 15    | 74.33  | 5.01 | 3.70  | 1.35   |        |      |       |        |        |
| <input checked="" type="checkbox"/> | D9  | GAPDH 15    | 74.71  | 6.32 | 3.98  | 1.59   |        |      |       |        |        |
| <input checked="" type="checkbox"/> | D10 | GAPDH 16    | 66.33  | 2.79 | 7.63  | 0.37   | 74.52  | 6.24 | 3.76  | 1.66   |        |
| <input checked="" type="checkbox"/> | D11 | GAPDH 16    | 74.39  | 5.83 | 3.85  | 1.52   |        |      |       |        |        |
| <input checked="" type="checkbox"/> | D12 | GAPDH 16    | 74.89  | 5.89 | 3.87  | 1.52   |        |      |       |        |        |
| <input checked="" type="checkbox"/> | E1  | FCER1A 13   | 74.97  | 3.48 | 2.47  | 1.41   | 79.28  | 2.57 | 2.30  | 1.12   |        |
| <input checked="" type="checkbox"/> | E2  | FCER1A 13   | 74.78  | 1.96 | 2.16  | 0.91   | 79.21  | 3.17 | 2.34  | 1.35   |        |
| <input checked="" type="checkbox"/> | E3  | FCER1A 13   | 74.42  | 0.92 | 2.07  | 0.45   | 78.97  | 5.11 | 2.43  | 2.10   |        |
| <input checked="" type="checkbox"/> | E4  | FCER1A 14   | 78.78  | 5.96 | 2.45  | 2.43   |        |      |       |        |        |
| <input checked="" type="checkbox"/> | E5  | FCER1A 14   | 74.69  | 1.46 | 2.20  | 0.66   | 79.14  | 2.39 | 2.26  | 1.06   |        |
| <input checked="" type="checkbox"/> | E6  | FCER1A 14   | 78.90  | 4.91 | 2.49  | 1.97   |        |      |       |        |        |
| <input checked="" type="checkbox"/> | E7  | FCER1A 15   | 75.17  | 4.10 | 3.49  | 1.17   |        |      |       |        |        |
| <input checked="" type="checkbox"/> | E8  | FCER1A 15   | 78.84  | 4.79 | 2.47  | 1.94   |        |      |       |        |        |
| <input checked="" type="checkbox"/> | E9  | FCER1A 15   | 74.06  | 0.54 | 1.94  | 0.28   | 78.91  | 5.12 | 2.42  | 2.11   |        |
| <input checked="" type="checkbox"/> | E10 | FCER1A 16   | 74.45  | 0.95 | 1.97  | 0.48   | 79.14  | 4.64 | 2.34  | 1.99   |        |
| <input checked="" type="checkbox"/> | E11 | FCER1A 16   | 78.96  | 6.16 | 2.37  | 2.60   |        |      |       |        |        |
| <input checked="" type="checkbox"/> | E12 | FCER1A 16   | 78.79  | 4.48 | 2.29  | 1.96   |        |      |       |        |        |
| <input checked="" type="checkbox"/> | F1  | RGS1 13     | 76.95  | 1.46 | 2.45  | 0.60   |        |      |       |        |        |
| <input checked="" type="checkbox"/> | F2  | RGS1 13     | 86.54  | 4.81 | 2.61  | 1.84   |        |      |       |        |        |
| <input checked="" type="checkbox"/> | F3  | RGS1 13     | 86.64  | 5.18 | 2.42  | 2.14   |        |      |       |        |        |
| <input checked="" type="checkbox"/> | F4  | RGS1 14     | 86.66  | 4.47 | 2.67  | 1.67   |        |      |       |        |        |
| <input checked="" type="checkbox"/> | F5  | RGS1 14     | 86.55  | 4.09 | 2.52  | 1.62   |        |      |       |        |        |

## Results

| Inc                                 | Pos | Sample Name | Peak 1 |      |       |        | Peak 2 |      |       |        | Status |
|-------------------------------------|-----|-------------|--------|------|-------|--------|--------|------|-------|--------|--------|
|                                     |     |             | Tm     | Area | Width | Height | Tm     | Area | Width | Height |        |
| <input checked="" type="checkbox"/> | F6  | RGS1 14     | 75.98  | 1.45 | 4.74  | 0.31   | 86.64  | 3.25 | 3.54  | 0.92   |        |
| <input checked="" type="checkbox"/> | F7  | RGS1 15     | 86.59  | 4.20 | 2.91  | 1.44   |        |      |       |        |        |
| <input checked="" type="checkbox"/> | F8  | RGS1 15     | 86.65  | 3.87 | 2.72  | 1.43   |        |      |       |        |        |
| <input checked="" type="checkbox"/> | F9  | RGS1 15     | 75.58  | 1.16 | 4.75  | 0.24   |        |      |       |        |        |
| <input checked="" type="checkbox"/> | F10 | RGS1 16     | 76.42  | 2.47 | 6.20  | 0.40   |        |      |       |        |        |
| <input checked="" type="checkbox"/> | F11 | RGS1 16     | 77.28  | 0.88 | 1.18  | 0.75   |        |      |       |        |        |
| <input checked="" type="checkbox"/> | F12 | RGS1 16     |        |      |       |        |        |      |       |        |        |
| <input checked="" type="checkbox"/> | G1  | blank       |        |      |       |        |        |      |       |        |        |
| <input checked="" type="checkbox"/> | G2  | blank       |        |      |       |        |        |      |       |        |        |
| <input checked="" type="checkbox"/> | G3  | blank       |        |      |       |        |        |      |       |        |        |
| <input checked="" type="checkbox"/> | G4  | blank       |        |      |       |        |        |      |       |        |        |
| <input checked="" type="checkbox"/> | G5  | blank       |        |      |       |        |        |      |       |        |        |
| <input checked="" type="checkbox"/> | G6  | blank       |        |      |       |        |        |      |       |        |        |
| <input checked="" type="checkbox"/> | G7  | blank       |        |      |       |        |        |      |       |        |        |
| <input checked="" type="checkbox"/> | G8  | blank       |        |      |       |        |        |      |       |        |        |
| <input checked="" type="checkbox"/> | G9  | blank       |        |      |       |        |        |      |       |        |        |
| <input checked="" type="checkbox"/> | G10 | blank       |        |      |       |        |        |      |       |        |        |
| <input checked="" type="checkbox"/> | G11 | blank       |        |      |       |        |        |      |       |        |        |
| <input checked="" type="checkbox"/> | G12 | blank       |        |      |       |        |        |      |       |        |        |
| <input checked="" type="checkbox"/> | H1  | blank       |        |      |       |        |        |      |       |        |        |
| <input checked="" type="checkbox"/> | H2  | blank       |        |      |       |        |        |      |       |        |        |
| <input checked="" type="checkbox"/> | H3  | blank       |        |      |       |        |        |      |       |        |        |
| <input checked="" type="checkbox"/> | H4  | blank       |        |      |       |        |        |      |       |        |        |
| <input checked="" type="checkbox"/> | H5  | blank       |        |      |       |        |        |      |       |        |        |
| <input checked="" type="checkbox"/> | H6  | blank       |        |      |       |        |        |      |       |        |        |
| <input checked="" type="checkbox"/> | H7  | blank       |        |      |       |        |        |      |       |        |        |
| <input checked="" type="checkbox"/> | H8  | blank       |        |      |       |        |        |      |       |        |        |
| <input checked="" type="checkbox"/> | H9  | blank       |        |      |       |        |        |      |       |        |        |
| <input checked="" type="checkbox"/> | H10 | blank       |        |      |       |        |        |      |       |        |        |
| <input checked="" type="checkbox"/> | H11 | blank       |        |      |       |        |        |      |       |        |        |
| <input checked="" type="checkbox"/> | H12 | blank       |        |      |       |        |        |      |       |        |        |

### Melting Curves

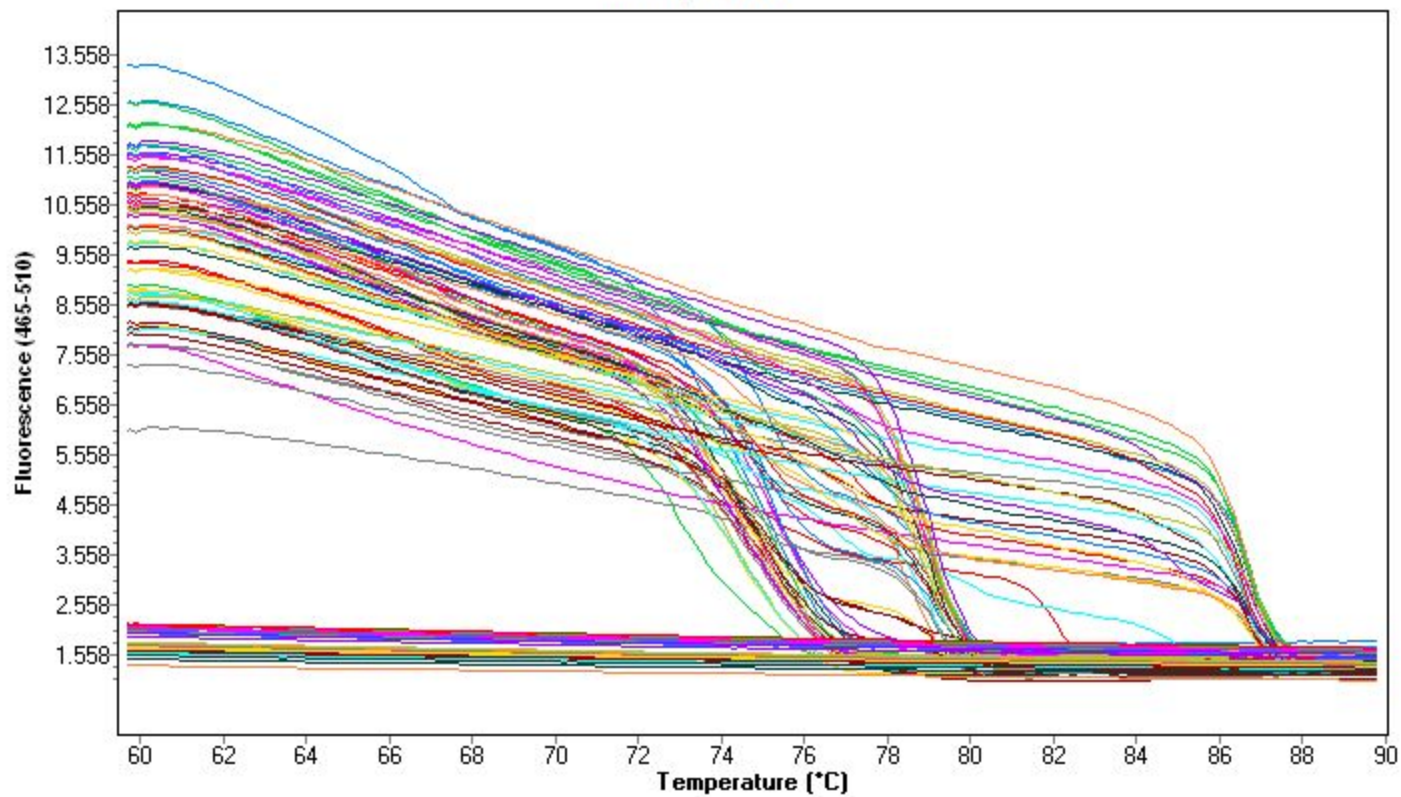

### Melting Peaks

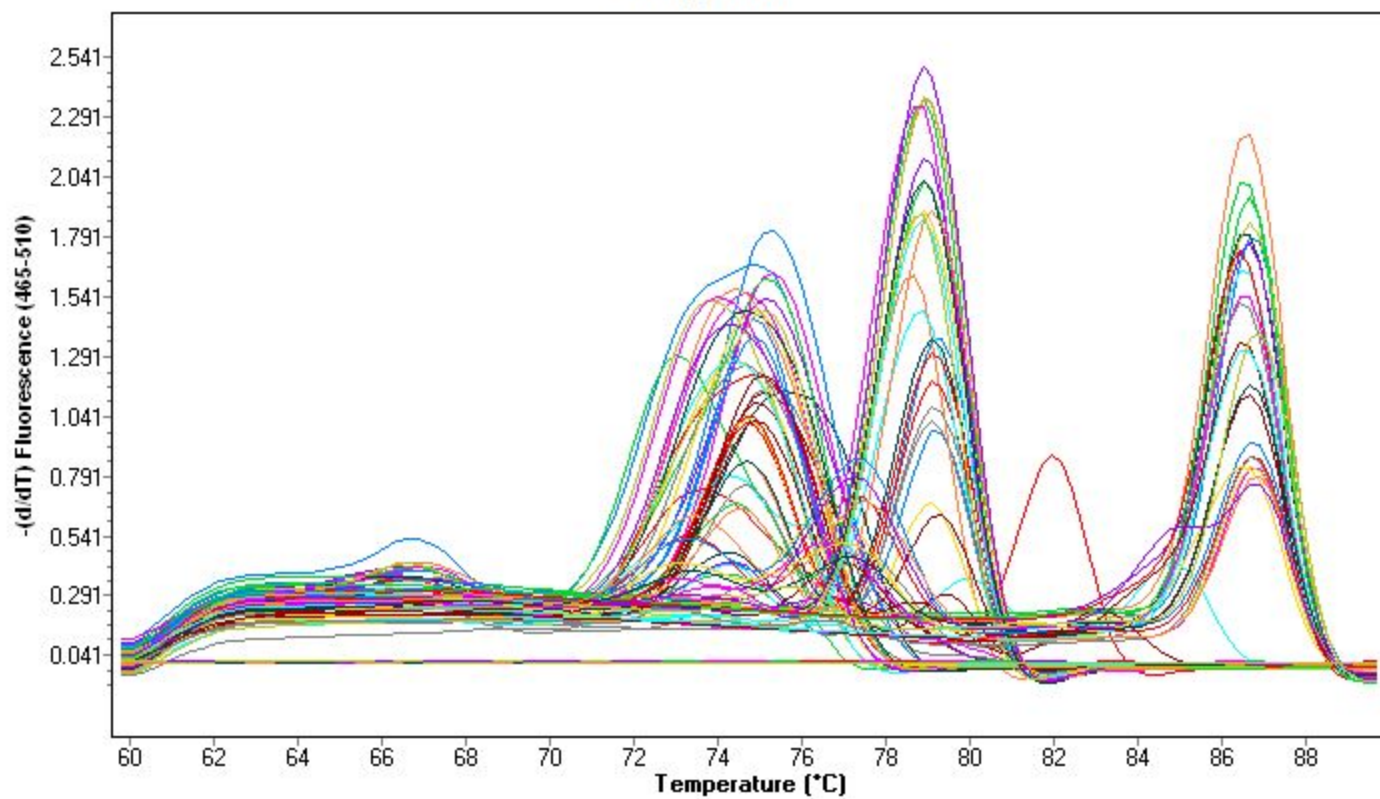

### Analysis Notes



## Abs Quant/2nd Derivative Max for All Samples (1) (Abs Quant/2nd Derivative Max)

### Settings

|                    |                 |       |  |
|--------------------|-----------------|-------|--|
| Channel            | 465-510         |       |  |
| Color Compensation | Off             |       |  |
| Program            | Program         | Units |  |
| Mode               | High Confidence |       |  |

|             |             |
|-------------|-------------|
| Subset Name | All Samples |
|-------------|-------------|

### Results

| Inc                                 | Pos | Name      | Type    | CP    | Concentration | Standard | Status |
|-------------------------------------|-----|-----------|---------|-------|---------------|----------|--------|
| <input checked="" type="checkbox"/> | A1  | GAPDH 9   | Unknown | 30.70 |               |          |        |
| <input checked="" type="checkbox"/> | A2  | GAPDH 9   | Unknown | 32.82 |               |          |        |
| <input checked="" type="checkbox"/> | A3  | GAPDH 9   | Unknown | 35.00 |               |          | >      |
| <input checked="" type="checkbox"/> | A4  | GAPDH 10  | Unknown | 32.35 |               |          |        |
| <input checked="" type="checkbox"/> | A5  | GAPDH 10  | Unknown | 29.30 |               |          |        |
| <input checked="" type="checkbox"/> | A6  | GAPDH 10  | Unknown | 35.00 |               |          | >      |
| <input checked="" type="checkbox"/> | A7  | GAPDH 11  | Unknown | 25.51 |               |          |        |
| <input checked="" type="checkbox"/> | A8  | GAPDH 11  | Unknown | 32.47 |               |          |        |
| <input checked="" type="checkbox"/> | A9  | GAPDH 11  | Unknown | 35.00 |               |          | >      |
| <input checked="" type="checkbox"/> | A10 | GAPDH 12  | Unknown | 35.00 |               |          | >      |
| <input checked="" type="checkbox"/> | A11 | GAPDH 12  | Unknown | 28.74 |               |          |        |
| <input checked="" type="checkbox"/> | A12 | GAPDH 12  | Unknown | 35.00 |               |          | >      |
| <input checked="" type="checkbox"/> | B1  | FCER1A 9  | Unknown | 30.00 |               |          |        |
| <input checked="" type="checkbox"/> | B2  | FCER1A 9  | Unknown | 29.91 |               |          |        |
| <input checked="" type="checkbox"/> | B3  | FCER1A 9  | Unknown | 31.11 |               |          |        |
| <input checked="" type="checkbox"/> | B4  | FCER1A 10 | Unknown | 30.02 |               |          |        |
| <input checked="" type="checkbox"/> | B5  | FCER1A 10 | Unknown | 35.00 |               |          | >      |
| <input checked="" type="checkbox"/> | B6  | FCER1A 10 | Unknown | 31.51 |               |          |        |
| <input checked="" type="checkbox"/> | B7  | FCER1A 11 | Unknown | 29.17 |               |          |        |
| <input checked="" type="checkbox"/> | B8  | FCER1A 11 | Unknown | 31.13 |               |          |        |
| <input checked="" type="checkbox"/> | B9  | FCER1A 11 | Unknown | 30.67 |               |          |        |
| <input checked="" type="checkbox"/> | B10 | FCER1A 12 | Unknown | 30.94 |               |          |        |
| <input checked="" type="checkbox"/> | B11 | FCER1A 12 | Unknown | 30.75 |               |          |        |
| <input checked="" type="checkbox"/> | B12 | FCER1A 12 | Unknown | 31.26 |               |          |        |
| <input checked="" type="checkbox"/> | C1  | RGS1 9    | Unknown | 35.00 |               |          | >      |
| <input checked="" type="checkbox"/> | C2  | RGS1 9    | Unknown | 33.00 |               |          |        |
| <input checked="" type="checkbox"/> | C3  | RGS1 9    | Unknown | 35.00 |               |          | >      |
| <input checked="" type="checkbox"/> | C4  | RGS1 10   | Unknown | 35.00 |               |          | >      |

> - Late Cp call (last five cycles) has higher uncertainty

## Results

| Inc                                 | Pos | Name      | Type    | CP    | Concentration | Standard | Status |
|-------------------------------------|-----|-----------|---------|-------|---------------|----------|--------|
| <input checked="" type="checkbox"/> | C5  | RGS1 10   | Unknown | 35.00 |               |          | >      |
| <input checked="" type="checkbox"/> | C6  | RGS1 10   | Unknown | 35.00 |               |          | >      |
| <input checked="" type="checkbox"/> | C7  | RGS1 1    | Unknown | 34.54 |               |          |        |
| <input checked="" type="checkbox"/> | C8  | RGS1 1    | Unknown | 35.00 |               |          | >      |
| <input checked="" type="checkbox"/> | C9  | RGS1 1    | Unknown | 35.00 |               |          | >      |
| <input checked="" type="checkbox"/> | C10 | RGS1 12   | Unknown | 32.67 |               |          |        |
| <input checked="" type="checkbox"/> | C11 | RGS1 12   | Unknown | 33.81 |               |          |        |
| <input checked="" type="checkbox"/> | C12 | RGS1 12   | Unknown | 33.44 |               |          |        |
| <input checked="" type="checkbox"/> | D1  | GAPDH 13  | Unknown | 32.05 |               |          |        |
| <input checked="" type="checkbox"/> | D2  | GAPDH 13  | Unknown | 31.62 |               |          |        |
| <input checked="" type="checkbox"/> | D3  | GAPDH 13  | Unknown | 35.00 |               |          | >      |
| <input checked="" type="checkbox"/> | D4  | GAPDH 14  | Unknown | 32.88 |               |          |        |
| <input checked="" type="checkbox"/> | D5  | GAPDH 14  | Unknown | 31.08 |               |          |        |
| <input checked="" type="checkbox"/> | D6  | GAPDH 14  | Unknown | 35.00 |               |          | >      |
| <input checked="" type="checkbox"/> | D7  | GAPDH 15  | Unknown | 30.57 |               |          |        |
| <input checked="" type="checkbox"/> | D8  | GAPDH 15  | Unknown | 35.00 |               |          | >      |
| <input checked="" type="checkbox"/> | D9  | GAPDH 15  | Unknown | 33.36 |               |          |        |
| <input checked="" type="checkbox"/> | D10 | GAPDH 16  | Unknown | 33.20 |               |          |        |
| <input checked="" type="checkbox"/> | D11 | GAPDH 16  | Unknown | 35.00 |               |          | >      |
| <input checked="" type="checkbox"/> | D12 | GAPDH 16  | Unknown | 33.35 |               |          |        |
| <input checked="" type="checkbox"/> | E1  | FCER1A 13 | Unknown | 29.81 |               |          |        |
| <input checked="" type="checkbox"/> | E2  | FCER1A 13 | Unknown | 29.49 |               |          |        |
| <input checked="" type="checkbox"/> | E3  | FCER1A 13 | Unknown | 31.04 |               |          |        |
| <input checked="" type="checkbox"/> | E4  | FCER1A 14 | Unknown | 29.49 |               |          |        |
| <input checked="" type="checkbox"/> | E5  | FCER1A 14 | Unknown | 28.67 |               |          |        |
| <input checked="" type="checkbox"/> | E6  | FCER1A 14 | Unknown | 28.74 |               |          |        |
| <input checked="" type="checkbox"/> | E7  | FCER1A 15 | Unknown | 29.11 |               |          |        |
| <input checked="" type="checkbox"/> | E8  | FCER1A 15 | Unknown | 32.33 |               |          |        |
| <input checked="" type="checkbox"/> | E9  | FCER1A 15 | Unknown | 30.88 |               |          |        |
| <input checked="" type="checkbox"/> | E10 | FCER1A 16 | Unknown | 29.97 |               |          |        |
| <input checked="" type="checkbox"/> | E11 | FCER1A 16 | Unknown | 30.96 |               |          |        |
| <input checked="" type="checkbox"/> | E12 | FCER1A 16 | Unknown | 30.64 |               |          |        |
| <input checked="" type="checkbox"/> | F1  | RGS1 13   | Unknown | 31.90 |               |          |        |
| <input checked="" type="checkbox"/> | F2  | RGS1 13   | Unknown | 33.90 |               |          |        |
| <input checked="" type="checkbox"/> | F3  | RGS1 13   | Unknown | 35.00 |               |          | >      |
| <input checked="" type="checkbox"/> | F4  | RGS1 14   | Unknown | 32.42 |               |          |        |
| <input checked="" type="checkbox"/> | F5  | RGS1 14   | Unknown | 32.70 |               |          |        |

> - Late Cp call (last five cycles) has higher uncertainty

## Results

| Inc                                 | Pos | Name    | Type    | CP    | Concentration | Standard | Status |
|-------------------------------------|-----|---------|---------|-------|---------------|----------|--------|
| <input checked="" type="checkbox"/> | F6  | RGS1 14 | Unknown | 31.23 |               |          |        |
| <input checked="" type="checkbox"/> | F7  | RGS1 15 | Unknown | 35.00 |               |          | >      |
| <input checked="" type="checkbox"/> | F8  | RGS1 15 | Unknown | 35.00 |               |          | >      |
| <input checked="" type="checkbox"/> | F9  | RGS1 15 | Unknown | 33.13 |               |          |        |
| <input checked="" type="checkbox"/> | F10 | RGS1 16 | Unknown | 32.74 |               |          |        |
| <input checked="" type="checkbox"/> | F11 | RGS1 16 | Unknown | 33.21 |               |          |        |
| <input checked="" type="checkbox"/> | F12 | RGS1 16 | Unknown | 35.00 |               |          | >      |
| <input checked="" type="checkbox"/> | G1  | blank   | Unknown |       |               |          |        |
| <input checked="" type="checkbox"/> | G2  | blank   | Unknown |       |               |          |        |
| <input checked="" type="checkbox"/> | G3  | blank   | Unknown |       |               |          |        |
| <input checked="" type="checkbox"/> | G4  | blank   | Unknown |       |               |          |        |
| <input checked="" type="checkbox"/> | G5  | blank   | Unknown |       |               |          |        |
| <input checked="" type="checkbox"/> | G6  | blank   | Unknown |       |               |          |        |
| <input checked="" type="checkbox"/> | G7  | blank   | Unknown |       |               |          |        |
| <input checked="" type="checkbox"/> | G8  | blank   | Unknown |       |               |          |        |
| <input checked="" type="checkbox"/> | G9  | blank   | Unknown |       |               |          |        |
| <input checked="" type="checkbox"/> | G10 | blank   | Unknown |       |               |          |        |
| <input checked="" type="checkbox"/> | G11 | blank   | Unknown |       |               |          |        |
| <input checked="" type="checkbox"/> | G12 | blank   | Unknown |       |               |          |        |
| <input checked="" type="checkbox"/> | H1  | blank   | Unknown |       |               |          |        |
| <input checked="" type="checkbox"/> | H2  | blank   | Unknown |       |               |          |        |
| <input checked="" type="checkbox"/> | H3  | blank   | Unknown |       |               |          |        |
| <input checked="" type="checkbox"/> | H4  | blank   | Unknown |       |               |          |        |
| <input checked="" type="checkbox"/> | H5  | blank   | Unknown |       |               |          |        |
| <input checked="" type="checkbox"/> | H6  | blank   | Unknown |       |               |          |        |
| <input checked="" type="checkbox"/> | H7  | blank   | Unknown |       |               |          |        |
| <input checked="" type="checkbox"/> | H8  | blank   | Unknown |       |               |          |        |
| <input checked="" type="checkbox"/> | H9  | blank   | Unknown |       |               |          |        |
| <input checked="" type="checkbox"/> | H10 | blank   | Unknown |       |               |          |        |
| <input checked="" type="checkbox"/> | H11 | blank   | Unknown |       |               |          |        |
| <input checked="" type="checkbox"/> | H12 | blank   | Unknown |       |               |          |        |

> - Late Cp call (last five cycles) has higher uncertainty

### Amplification Curves

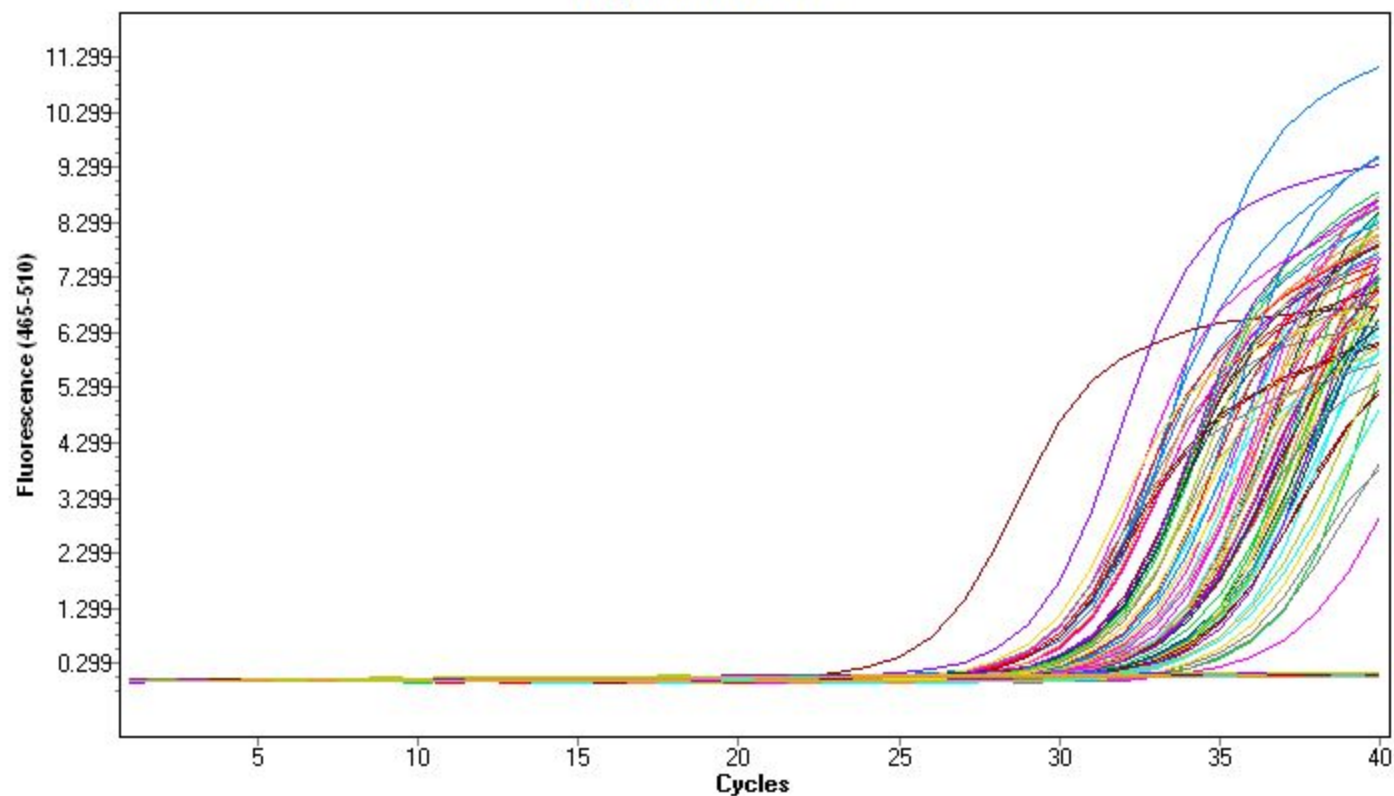

### Standard Curve

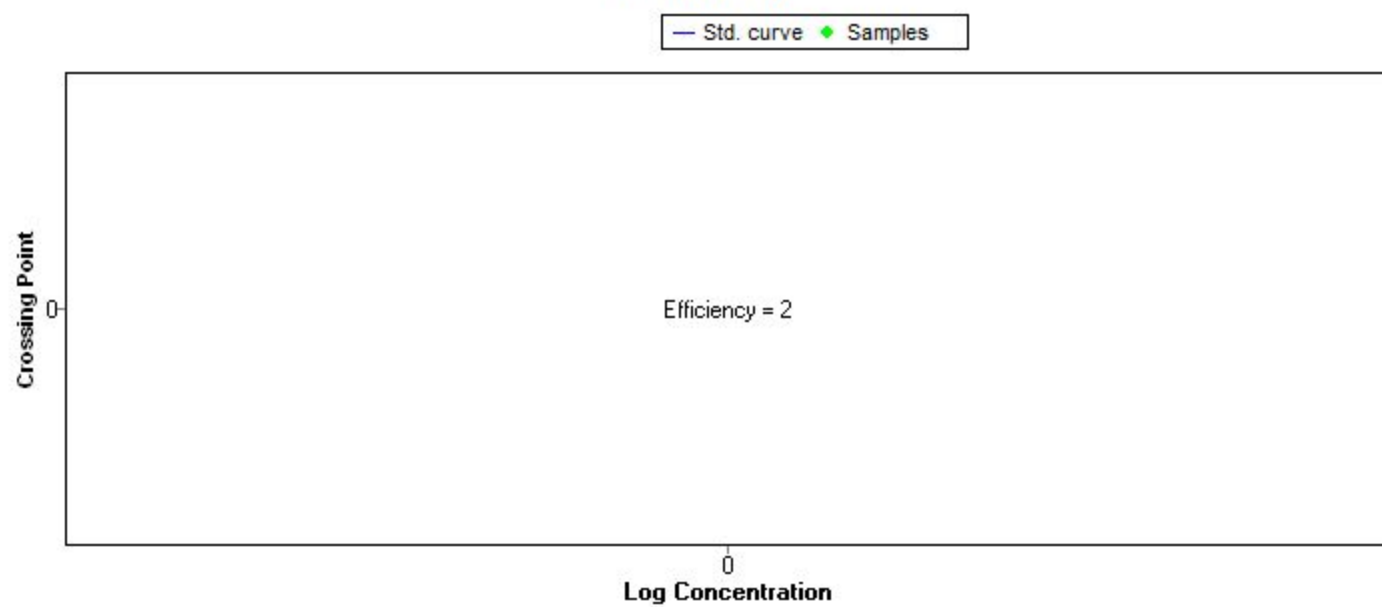

Analysis Notes
