# Supplementary material for: Exploring differential gene expression and biomarker potential in systemic lupus erythematosus: a retrospective study
Source: PeerJ journal article supplement (doi:10.7717/peerj.19891), 2025-09-08
Supplement: qPCR_RAW_data.zip [file qPCR_RAW_data.zip]

# cobas® 4800 User Defined Workflow (UDF)

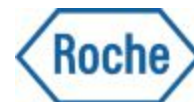

**xj20250528 SLE1**

## Experiment

|               |                       |                    |                                    |
|---------------|-----------------------|--------------------|------------------------------------|
| Creation Date | 5/28/2025 10:50:16 AM | Last Modified Date | 6/2/2025 2:43:41 AM                |
| Operator      | System Admin          | Owner              | System Admin                       |
| Start Time    | 5/28/2025 10:50:43 AM | End Time           | 5/28/2025 11:50:16 AM              |
| Run State     | Completed             | Software Version   | LCS480 1.5.1.62 SP3 - UDF 2.1.0.26 |
| Macro         |                       | Macro Owner        |                                    |
| Macro Status  |                       |                    |                                    |
| Templates     | gongying              | Plate ID           |                                    |
| Test ID       |                       | Lot ID             |                                    |
| Color Comp ID |                       |                    |                                    |
| Run Notes     |                       |                    |                                    |

## Programs

|              |         |               |      |
|--------------|---------|---------------|------|
| Program Name | Program |               |      |
| Cycles       | 1       | Analysis Mode | None |

| Target (°C) | Acquisition Mode | Hold (hh:mm:ss) | Ramp Rate (°C/s) | Acquisitions (per °C) | Sec Target (°C) | Step size (°C) | Step Delay (cycles) |
|-------------|------------------|-----------------|------------------|-----------------------|-----------------|----------------|---------------------|
| 95          | None             | 00:00:30        | 4.40             |                       | 0               | 0              | 0                   |

|              |         |               |                |
|--------------|---------|---------------|----------------|
| Program Name | Program |               |                |
| Cycles       | 40      | Analysis Mode | Quantification |

| Target (°C) | Acquisition Mode | Hold (hh:mm:ss) | Ramp Rate (°C/s) | Acquisitions (per °C) | Sec Target (°C) | Step size (°C) | Step Delay (cycles) |
|-------------|------------------|-----------------|------------------|-----------------------|-----------------|----------------|---------------------|
| 95          | None             | 00:00:15        | 4.40             |                       | 0               | 0              | 0                   |
| 60          | Single           | 00:00:30        | 2.20             |                       | 0               | 0              | 0                   |

|              |         |               |                |
|--------------|---------|---------------|----------------|
| Program Name | Program |               |                |
| Cycles       | 1       | Analysis Mode | Melting Curves |

| Target (°C) | Acquisition Mode | Hold (hh:mm:ss) | Ramp Rate (°C/s) | Acquisitions (per °C) | Sec Target (°C) | Step size (°C) | Step Delay (cycles) |
|-------------|------------------|-----------------|------------------|-----------------------|-----------------|----------------|---------------------|
| 95          | None             | 00:01:00        | 4.40             |                       | 0               | 0              | 0                   |
| 60          | None             | 00:00:30        | 2.20             |                       | 0               | 0              | 0                   |
| 90          | Continuous       |                 | 0.11             | 5                     | 0               | 0              | 0                   |

|              |         |               |      |
|--------------|---------|---------------|------|
| Program Name | Program |               |      |
| Cycles       | 1       | Analysis Mode | None |

| Target (°C) | Acquisition Mode | Hold (hh:mm:ss) | Ramp Rate (°C/s) | Acquisitions (per °C) | Sec Target (°C) | Step size (°C) | Step Delay (cycles) |
|-------------|------------------|-----------------|------------------|-----------------------|-----------------|----------------|---------------------|
|-------------|------------------|-----------------|------------------|-----------------------|-----------------|----------------|---------------------|

| Target (°C) | Acquisition Mode | Hold (hh:mm:ss) | Ramp Rate (°C/s) | Acquisitions (per °C) | Sec Target (°C) | Step size (°C) | Step Delay (cycles) |
|-------------|------------------|-----------------|------------------|-----------------------|-----------------|----------------|---------------------|
| 40          | None             | 00:00:30        | 2.20             |                       | 0               | 0              | 0                   |

## Samples

|              |          |             |          |              |  |
|--------------|----------|-------------|----------|--------------|--|
| Sample Count |          | 96          |          |              |  |
| Subset       |          | All Samples |          |              |  |
| Pos          | Name     | ID          | Repl. Of | Sample Notes |  |
| A1           | GAPDH 1  |             |          |              |  |
| A2           | GAPDH 1  |             |          |              |  |
| A3           | GAPDH 1  |             |          |              |  |
| A4           | GAPDH 2  |             |          |              |  |
| A5           | GAPDH 2  |             |          |              |  |
| A6           | GAPDH 2  |             |          |              |  |
| A7           | GAPDH 3  |             |          |              |  |
| A8           | GAPDH 3  |             |          |              |  |
| A9           | GAPDH 3  |             |          |              |  |
| A10          | GAPDH 4  |             |          |              |  |
| A11          | GAPDH 4  |             |          |              |  |
| A12          | GAPDH 4  |             |          |              |  |
| B1           | FCER1A 1 |             |          |              |  |
| B2           | FCER1A 1 |             |          |              |  |
| B3           | FCER1A 1 |             |          |              |  |
| B4           | FCER1A 2 |             |          |              |  |
| B5           | FCER1A 2 |             |          |              |  |
| B6           | FCER1A 2 |             |          |              |  |
| B7           | FCER1A 3 |             |          |              |  |
| B8           | FCER1A 3 |             |          |              |  |
| B9           | FCER1A 3 |             |          |              |  |
| B10          | FCER1A 4 |             |          |              |  |
| B11          | FCER1A 4 |             |          |              |  |
| B12          | FCER1A 4 |             |          |              |  |
| C1           | RGS1 1   |             |          |              |  |
| C2           | RGS1 1   |             |          |              |  |
| C3           | RGS1 1   |             |          |              |  |
| C4           | RGS1 2   |             |          |              |  |
| C5           | RGS1 2   |             |          |              |  |
| C6           | RGS1 2   |             |          |              |  |
| C7           | RGS1 3   |             |          |              |  |
| C8           | RGS1 3   |             |          |              |  |
| C9           | RGS1 3   |             |          |              |  |
| C10          | RGS1 4   |             |          |              |  |
| C11          | RGS1 4   |             |          |              |  |
| C12          | RGS1 4   |             |          |              |  |

## Samples

| Sample Count |          | 96          |          |              |
|--------------|----------|-------------|----------|--------------|
| Subset       |          | All Samples |          |              |
| Pos          | Name     | ID          | Repl. Of | Sample Notes |
| D1           | GAPDH 5  |             |          |              |
| D2           | GAPDH 5  |             |          |              |
| D3           | GAPDH 5  |             |          |              |
| D4           | GAPDH 6  |             |          |              |
| D5           | GAPDH 6  |             |          |              |
| D6           | GAPDH 6  |             |          |              |
| D7           | GAPDH 7  |             |          |              |
| D8           | GAPDH 7  |             |          |              |
| D9           | GAPDH 7  |             |          |              |
| D10          | GAPDH 8  |             |          |              |
| D11          | GAPDH 8  |             |          |              |
| D12          | GAPDH 8  |             |          |              |
| E1           | FCER1A 5 |             |          |              |
| E2           | FCER1A 5 |             |          |              |
| E3           | FCER1A 5 |             |          |              |
| E4           | FCER1A 6 |             |          |              |
| E5           | FCER1A 6 |             |          |              |
| E6           | FCER1A 6 |             |          |              |
| E7           | FCER1A 7 |             |          |              |
| E8           | FCER1A 7 |             |          |              |
| E9           | FCER1A 7 |             |          |              |
| E10          | FCER1A 8 |             |          |              |
| E11          | FCER1A 8 |             |          |              |
| E12          | FCER1A 8 |             |          |              |
| F1           | RGS1 5   |             |          |              |
| F2           | RGS1 5   |             |          |              |
| F3           | RGS1 5   |             |          |              |
| F4           | RGS1 6   |             |          |              |
| F5           | RGS1 6   |             |          |              |
| F6           | RGS1 6   |             |          |              |
| F7           | RGS1 7   |             |          |              |
| F8           | RGS1 7   |             |          |              |
| F9           | RGS1 7   |             |          |              |
| F10          | RGS1 8   |             |          |              |
| F11          | RGS1 8   |             |          |              |
| F12          | RGS1 8   |             |          |              |
| G1           | blank    |             |          |              |
| G2           | blank    |             |          |              |
| G3           | blank    |             |          |              |

## Samples

| Sample Count | 96          |    |          |              |
|--------------|-------------|----|----------|--------------|
| Subset       | All Samples |    |          |              |
| Pos          | Name        | ID | Repl. Of | Sample Notes |
| G4           | blank       |    |          |              |
| G5           | blank       |    |          |              |
| G6           | blank       |    |          |              |
| G7           | blank       |    |          |              |
| G8           | blank       |    |          |              |
| G9           | blank       |    |          |              |
| G10          | blank       |    |          |              |
| G11          | blank       |    |          |              |
| G12          | blank       |    |          |              |
| H1           | blank       |    |          |              |
| H2           | blank       |    |          |              |
| H3           | blank       |    |          |              |
| H4           | blank       |    |          |              |
| H5           | blank       |    |          |              |
| H6           | blank       |    |          |              |
| H7           | blank       |    |          |              |
| H8           | blank       |    |          |              |
| H9           | blank       |    |          |              |
| H10          | blank       |    |          |              |
| H11          | blank       |    |          |              |
| H12          | blank       |    |          |              |

## Instrument

|      |      |               |       |
|------|------|---------------|-------|
| Name | Z480 | Serial Number | 56319 |
|------|------|---------------|-------|

## Revision History

| Revision | Date | User | Reason |
|----------|------|------|--------|
|          |      |      |        |

## Abs Quant/2nd Derivative Max for All Samples (Abs Quant/2nd Derivative Max)

### Settings

|                    |                 |       |  |
|--------------------|-----------------|-------|--|
| Channel            | 465-510         |       |  |
| Color Compensation | Off             |       |  |
| Program            | Program         | Units |  |
| Mode               | High Confidence |       |  |

|             |             |
|-------------|-------------|
| Subset Name | All Samples |
|-------------|-------------|

> - Late Cp call (last five cycles) has higher uncertainty

## Results

| Inc                                 | Pos | Name     | Type    | CP    | Concentration | Standard | Status |
|-------------------------------------|-----|----------|---------|-------|---------------|----------|--------|
| <input checked="" type="checkbox"/> | A1  | GAPDH 1  | Unknown | 30.93 |               |          |        |
| <input checked="" type="checkbox"/> | A2  | GAPDH 1  | Unknown | 30.22 |               |          |        |
| <input checked="" type="checkbox"/> | A3  | GAPDH 1  | Unknown | 30.27 |               |          |        |
| <input checked="" type="checkbox"/> | A4  | GAPDH 2  | Unknown | 29.75 |               |          |        |
| <input checked="" type="checkbox"/> | A5  | GAPDH 2  | Unknown | 32.17 |               |          |        |
| <input checked="" type="checkbox"/> | A6  | GAPDH 2  | Unknown | 28.85 |               |          |        |
| <input checked="" type="checkbox"/> | A7  | GAPDH 3  | Unknown | 29.11 |               |          |        |
| <input checked="" type="checkbox"/> | A8  | GAPDH 3  | Unknown | 28.48 |               |          |        |
| <input checked="" type="checkbox"/> | A9  | GAPDH 3  | Unknown | 28.88 |               |          |        |
| <input checked="" type="checkbox"/> | A10 | GAPDH 4  | Unknown | 23.82 |               |          |        |
| <input checked="" type="checkbox"/> | A11 | GAPDH 4  | Unknown | 25.92 |               |          |        |
| <input checked="" type="checkbox"/> | A12 | GAPDH 4  | Unknown | 27.54 |               |          |        |
| <input checked="" type="checkbox"/> | B1  | FCER1A 1 | Unknown | 28.52 |               |          |        |
| <input checked="" type="checkbox"/> | B2  | FCER1A 1 | Unknown | 29.22 |               |          |        |
| <input checked="" type="checkbox"/> | B3  | FCER1A 1 | Unknown | 28.43 |               |          |        |
| <input checked="" type="checkbox"/> | B4  | FCER1A 2 | Unknown | 28.34 |               |          |        |
| <input checked="" type="checkbox"/> | B5  | FCER1A 2 | Unknown | 30.22 |               |          |        |
| <input checked="" type="checkbox"/> | B6  | FCER1A 2 | Unknown | 27.88 |               |          |        |
| <input checked="" type="checkbox"/> | B7  | FCER1A 3 | Unknown | 30.55 |               |          |        |
| <input checked="" type="checkbox"/> | B8  | FCER1A 3 | Unknown | 28.68 |               |          |        |
| <input checked="" type="checkbox"/> | B9  | FCER1A 3 | Unknown | 27.77 |               |          |        |
| <input checked="" type="checkbox"/> | B10 | FCER1A 4 | Unknown | 28.78 |               |          |        |
| <input checked="" type="checkbox"/> | B11 | FCER1A 4 | Unknown |       |               |          |        |
| <input checked="" type="checkbox"/> | B12 | FCER1A 4 | Unknown | 26.75 |               |          |        |
| <input checked="" type="checkbox"/> | C1  | RGS1 1   | Unknown | 35.00 |               |          | >      |
| <input checked="" type="checkbox"/> | C2  | RGS1 1   | Unknown | 35.00 |               |          | >      |
| <input checked="" type="checkbox"/> | C3  | RGS1 1   | Unknown | 32.22 |               |          |        |
| <input checked="" type="checkbox"/> | C4  | RGS1 2   | Unknown | 32.96 |               |          |        |
| <input checked="" type="checkbox"/> | C5  | RGS1 2   | Unknown | 35.00 |               |          | >      |
| <input checked="" type="checkbox"/> | C6  | RGS1 2   | Unknown | 35.00 |               |          | >      |
| <input checked="" type="checkbox"/> | C7  | RGS1 3   | Unknown | 33.84 |               |          |        |
| <input checked="" type="checkbox"/> | C8  | RGS1 3   | Unknown | 35.00 |               |          | >      |
| <input checked="" type="checkbox"/> | C9  | RGS1 3   | Unknown | 35.00 |               |          | >      |
| <input checked="" type="checkbox"/> | C10 | RGS1 4   | Unknown | 31.03 |               |          |        |
| <input checked="" type="checkbox"/> | C11 | RGS1 4   | Unknown | 30.57 |               |          |        |
| <input checked="" type="checkbox"/> | C12 | RGS1 4   | Unknown | 31.84 |               |          |        |
| <input checked="" type="checkbox"/> | D1  | GAPDH 5  | Unknown | 29.33 |               |          |        |

> - Late Cp call (last five cycles) has higher uncertainty

## Results

| Inc                                 | Pos | Name     | Type    | CP    | Concentration | Standard | Status |
|-------------------------------------|-----|----------|---------|-------|---------------|----------|--------|
| <input checked="" type="checkbox"/> | D2  | GAPDH 5  | Unknown | 30.34 |               |          |        |
| <input checked="" type="checkbox"/> | D3  | GAPDH 5  | Unknown | 30.70 |               |          |        |
| <input checked="" type="checkbox"/> | D4  | GAPDH 6  | Unknown | 29.67 |               |          |        |
| <input checked="" type="checkbox"/> | D5  | GAPDH 6  | Unknown | 31.15 |               |          |        |
| <input checked="" type="checkbox"/> | D6  | GAPDH 6  | Unknown | 28.85 |               |          |        |
| <input checked="" type="checkbox"/> | D7  | GAPDH 7  | Unknown | 31.24 |               |          |        |
| <input checked="" type="checkbox"/> | D8  | GAPDH 7  | Unknown | 31.16 |               |          |        |
| <input checked="" type="checkbox"/> | D9  | GAPDH 7  | Unknown | 29.90 |               |          |        |
| <input checked="" type="checkbox"/> | D10 | GAPDH 8  | Unknown | 29.51 |               |          |        |
| <input checked="" type="checkbox"/> | D11 | GAPDH 8  | Unknown | 29.45 |               |          |        |
| <input checked="" type="checkbox"/> | D12 | GAPDH 8  | Unknown | 29.08 |               |          |        |
| <input checked="" type="checkbox"/> | E1  | FCER1A 5 | Unknown | 27.13 |               |          |        |
| <input checked="" type="checkbox"/> | E2  | FCER1A 5 | Unknown | 27.10 |               |          |        |
| <input checked="" type="checkbox"/> | E3  | FCER1A 5 | Unknown | 27.28 |               |          |        |
| <input checked="" type="checkbox"/> | E4  | FCER1A 6 | Unknown | 28.97 |               |          |        |
| <input checked="" type="checkbox"/> | E5  | FCER1A 6 | Unknown | 28.85 |               |          |        |
| <input checked="" type="checkbox"/> | E6  | FCER1A 6 | Unknown | 27.06 |               |          |        |
| <input checked="" type="checkbox"/> | E7  | FCER1A 7 | Unknown | 29.15 |               |          |        |
| <input checked="" type="checkbox"/> | E8  | FCER1A 7 | Unknown | 28.85 |               |          |        |
| <input checked="" type="checkbox"/> | E9  | FCER1A 7 | Unknown | 28.54 |               |          |        |
| <input checked="" type="checkbox"/> | E10 | FCER1A 8 | Unknown | 29.21 |               |          |        |
| <input checked="" type="checkbox"/> | E11 | FCER1A 8 | Unknown | 28.98 |               |          |        |
| <input checked="" type="checkbox"/> | E12 | FCER1A 8 | Unknown | 28.80 |               |          |        |
| <input checked="" type="checkbox"/> | F1  | RGS1 5   | Unknown | 28.89 |               |          |        |
| <input checked="" type="checkbox"/> | F2  | RGS1 5   | Unknown | 29.48 |               |          |        |
| <input checked="" type="checkbox"/> | F3  | RGS1 5   | Unknown | 28.25 |               |          |        |
| <input checked="" type="checkbox"/> | F4  | RGS1 6   | Unknown | 35.00 |               |          | >      |
| <input checked="" type="checkbox"/> | F5  | RGS1 6   | Unknown | 35.00 |               |          | >      |
| <input checked="" type="checkbox"/> | F6  | RGS1 6   | Unknown | 35.00 |               |          | >      |
| <input checked="" type="checkbox"/> | F7  | RGS1 7   | Unknown | 33.10 |               |          |        |
| <input checked="" type="checkbox"/> | F8  | RGS1 7   | Unknown | 32.97 |               |          |        |
| <input checked="" type="checkbox"/> | F9  | RGS1 7   | Unknown | 32.93 |               |          |        |
| <input checked="" type="checkbox"/> | F10 | RGS1 8   | Unknown | 32.61 |               |          |        |
| <input checked="" type="checkbox"/> | F11 | RGS1 8   | Unknown | 32.84 |               |          |        |
| <input checked="" type="checkbox"/> | F12 | RGS1 8   | Unknown | 33.79 |               |          |        |
| <input checked="" type="checkbox"/> | G1  | blank    | Unknown |       |               |          |        |
| <input checked="" type="checkbox"/> | G2  | blank    | Unknown |       |               |          |        |

> - Late Cp call (last five cycles) has higher uncertainty

---

**Results**

| Inc                                 | Pos | Name  | Type    | CP | Concentration | Standard | Status |
|-------------------------------------|-----|-------|---------|----|---------------|----------|--------|
| <input checked="" type="checkbox"/> | G3  | blank | Unknown |    |               |          |        |
| <input checked="" type="checkbox"/> | G4  | blank | Unknown |    |               |          |        |
| <input checked="" type="checkbox"/> | G5  | blank | Unknown |    |               |          |        |
| <input checked="" type="checkbox"/> | G6  | blank | Unknown |    |               |          |        |
| <input checked="" type="checkbox"/> | G7  | blank | Unknown |    |               |          |        |
| <input checked="" type="checkbox"/> | G8  | blank | Unknown |    |               |          |        |
| <input checked="" type="checkbox"/> | G9  | blank | Unknown |    |               |          |        |
| <input checked="" type="checkbox"/> | G10 | blank | Unknown |    |               |          |        |
| <input checked="" type="checkbox"/> | G11 | blank | Unknown |    |               |          |        |
| <input checked="" type="checkbox"/> | G12 | blank | Unknown |    |               |          |        |
| <input checked="" type="checkbox"/> | H1  | blank | Unknown |    |               |          |        |
| <input checked="" type="checkbox"/> | H2  | blank | Unknown |    |               |          |        |
| <input checked="" type="checkbox"/> | H3  | blank | Unknown |    |               |          |        |
| <input checked="" type="checkbox"/> | H4  | blank | Unknown |    |               |          |        |
| <input checked="" type="checkbox"/> | H5  | blank | Unknown |    |               |          |        |
| <input checked="" type="checkbox"/> | H6  | blank | Unknown |    |               |          |        |
| <input checked="" type="checkbox"/> | H7  | blank | Unknown |    |               |          |        |
| <input checked="" type="checkbox"/> | H8  | blank | Unknown |    |               |          |        |
| <input checked="" type="checkbox"/> | H9  | blank | Unknown |    |               |          |        |
| <input checked="" type="checkbox"/> | H10 | blank | Unknown |    |               |          |        |
| <input checked="" type="checkbox"/> | H11 | blank | Unknown |    |               |          |        |
| <input checked="" type="checkbox"/> | H12 | blank | Unknown |    |               |          |        |

> - Late Cp call (last five cycles) has higher uncertainty

### Amplification Curves

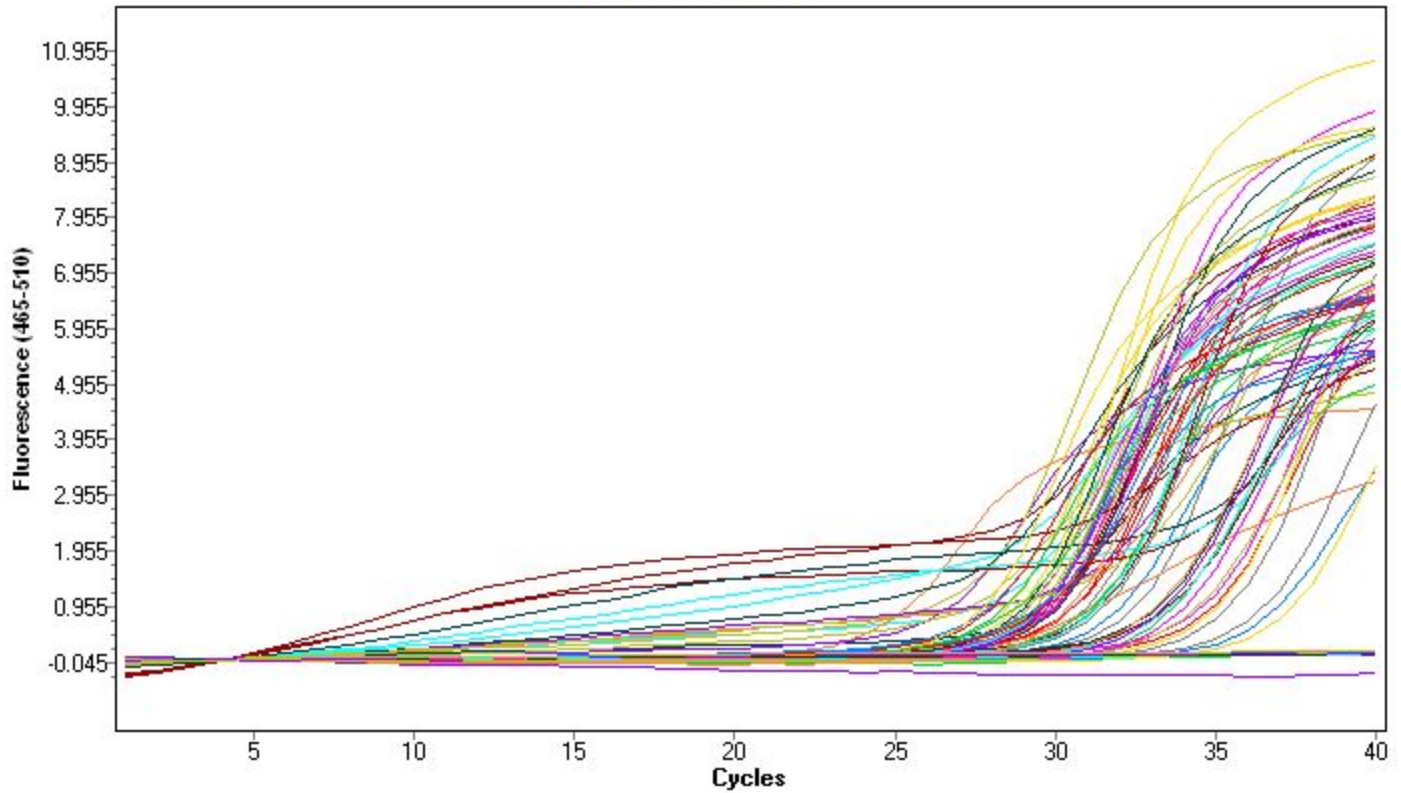

### Standard Curve

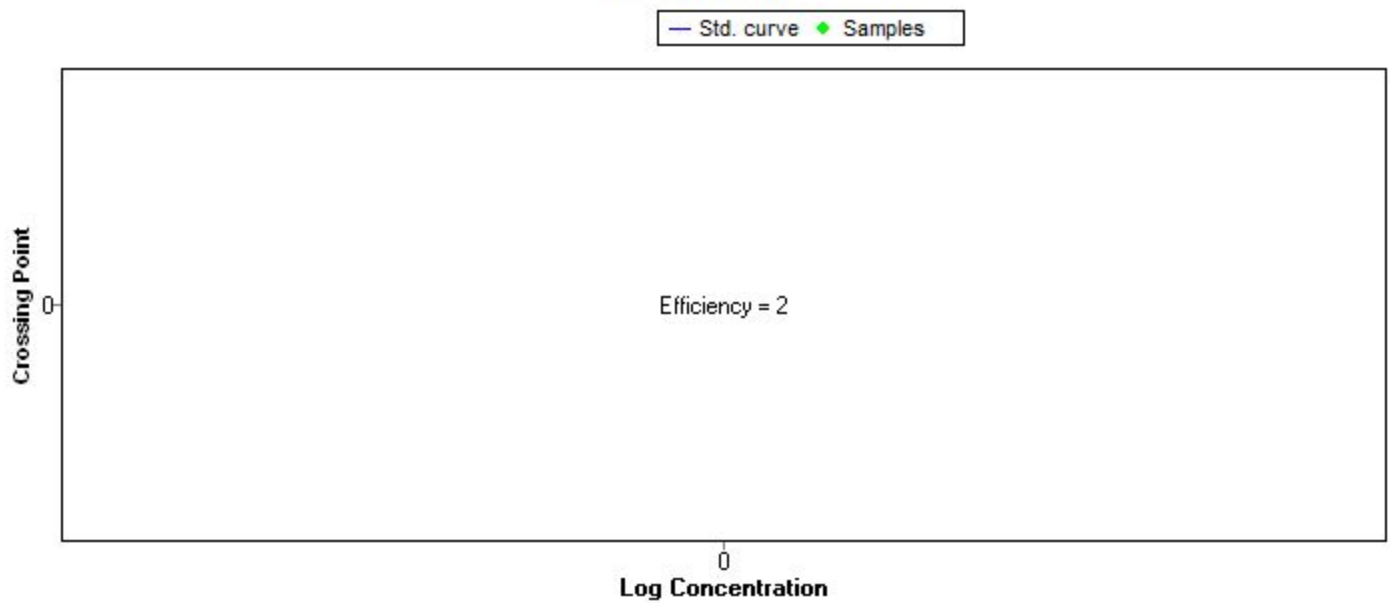

### Analysis Notes

Abs Quant/Fit Points for All Samples (Abs Quant/Fit Points)



## Settings

|                    |                       |                  |        |                    |         |  |
|--------------------|-----------------------|------------------|--------|--------------------|---------|--|
| Channel            | 465-510               |                  |        |                    |         |  |
| Color Compensation | Off                   |                  |        |                    |         |  |
| Standard Curve     | Set Efficiency (2.00) |                  |        |                    |         |  |
| Program            | Program               |                  |        |                    | Units   |  |
| First Cycle        | 1                     | Last Cycle       | 40     | Background         | 2-6     |  |
| Noiseband Method   | Auto                  | Noiseband        | 0.8071 | STD Dev Multiplier | 12.0000 |  |
| # of Fit Points    | 2                     | Threshold Method | Auto   | Threshold          | 0.8071  |  |

|             |             |
|-------------|-------------|
| Subset Name | All Samples |
|-------------|-------------|

## Results

| Inc                                 | Pos | Name     | Type    | CP    | Concentration | Standard | Status |
|-------------------------------------|-----|----------|---------|-------|---------------|----------|--------|
| <input checked="" type="checkbox"/> | A1  | GAPDH 1  | Unknown | 30.70 |               |          |        |
| <input checked="" type="checkbox"/> | A2  | GAPDH 1  | Unknown | 29.35 |               |          |        |
| <input checked="" type="checkbox"/> | A3  | GAPDH 1  | Unknown | 29.91 |               |          |        |
| <input checked="" type="checkbox"/> | A4  | GAPDH 2  | Unknown | 28.40 |               |          |        |
| <input checked="" type="checkbox"/> | A5  | GAPDH 2  | Unknown | 31.23 |               |          |        |
| <input checked="" type="checkbox"/> | A6  | GAPDH 2  | Unknown | 27.77 |               |          |        |
| <input checked="" type="checkbox"/> | A7  | GAPDH 3  | Unknown | 7.36  |               |          |        |
| <input checked="" type="checkbox"/> | A8  | GAPDH 3  | Unknown | 17.73 |               |          |        |
| <input checked="" type="checkbox"/> | A9  | GAPDH 3  | Unknown | 26.89 |               |          |        |
| <input checked="" type="checkbox"/> | A10 | GAPDH 4  | Unknown | 23.88 |               |          |        |
| <input checked="" type="checkbox"/> | A11 | GAPDH 4  | Unknown | 24.44 |               |          |        |
| <input checked="" type="checkbox"/> | A12 | GAPDH 4  | Unknown | 18.64 |               |          |        |
| <input checked="" type="checkbox"/> | B1  | FCER1A 1 | Unknown | 28.35 |               |          |        |
| <input checked="" type="checkbox"/> | B2  | FCER1A 1 | Unknown | 28.65 |               |          |        |
| <input checked="" type="checkbox"/> | B3  | FCER1A 1 | Unknown | 28.34 |               |          |        |
| <input checked="" type="checkbox"/> | B4  | FCER1A 2 | Unknown | 27.82 |               |          |        |
| <input checked="" type="checkbox"/> | B5  | FCER1A 2 | Unknown | 29.72 |               |          |        |
| <input checked="" type="checkbox"/> | B6  | FCER1A 2 | Unknown | 27.33 |               |          |        |
| <input checked="" type="checkbox"/> | B7  | FCER1A 3 | Unknown | 6.80  |               |          |        |
| <input checked="" type="checkbox"/> | B8  | FCER1A 3 | Unknown | 12.03 |               |          |        |
| <input checked="" type="checkbox"/> | B9  | FCER1A 3 | Unknown | 13.73 |               |          |        |
| <input checked="" type="checkbox"/> | B10 | FCER1A 4 | Unknown | 29.08 |               |          |        |
| <input checked="" type="checkbox"/> | B11 | FCER1A 4 | Unknown |       |               |          |        |
| <input checked="" type="checkbox"/> | B12 | FCER1A 4 | Unknown | 22.07 |               |          |        |
| <input checked="" type="checkbox"/> | C1  | RGS1 1   | Unknown | 35.66 |               |          |        |
| <input checked="" type="checkbox"/> | C2  | RGS1 1   | Unknown | 33.46 |               |          |        |
| <input checked="" type="checkbox"/> | C3  | RGS1 1   | Unknown | 32.48 |               |          |        |

## Results

| Inc                                 | Pos | Name     | Type    | CP    | Concentration | Standard | Status |
|-------------------------------------|-----|----------|---------|-------|---------------|----------|--------|
| <input checked="" type="checkbox"/> | C4  | RGS1 2   | Unknown | 32.74 |               |          |        |
| <input checked="" type="checkbox"/> | C5  | RGS1 2   | Unknown | 34.22 |               |          |        |
| <input checked="" type="checkbox"/> | C6  | RGS1 2   | Unknown | 33.72 |               |          |        |
| <input checked="" type="checkbox"/> | C7  | RGS1 3   | Unknown | 7.55  |               |          |        |
| <input checked="" type="checkbox"/> | C8  | RGS1 3   | Unknown | 10.92 |               |          |        |
| <input checked="" type="checkbox"/> | C9  | RGS1 3   | Unknown | 9.56  |               |          |        |
| <input checked="" type="checkbox"/> | C10 | RGS1 4   | Unknown | 16.49 |               |          |        |
| <input checked="" type="checkbox"/> | C11 | RGS1 4   | Unknown | 14.71 |               |          |        |
| <input checked="" type="checkbox"/> | C12 | RGS1 4   | Unknown | 15.25 |               |          |        |
| <input checked="" type="checkbox"/> | D1  | GAPDH 5  | Unknown | 28.35 |               |          |        |
| <input checked="" type="checkbox"/> | D2  | GAPDH 5  | Unknown | 28.89 |               |          |        |
| <input checked="" type="checkbox"/> | D3  | GAPDH 5  | Unknown | 29.60 |               |          |        |
| <input checked="" type="checkbox"/> | D4  | GAPDH 6  | Unknown | 28.67 |               |          |        |
| <input checked="" type="checkbox"/> | D5  | GAPDH 6  | Unknown | 30.26 |               |          |        |
| <input checked="" type="checkbox"/> | D6  | GAPDH 6  | Unknown | 27.50 |               |          |        |
| <input checked="" type="checkbox"/> | D7  | GAPDH 7  | Unknown | 29.76 |               |          |        |
| <input checked="" type="checkbox"/> | D8  | GAPDH 7  | Unknown | 29.90 |               |          |        |
| <input checked="" type="checkbox"/> | D9  | GAPDH 7  | Unknown | 28.73 |               |          |        |
| <input checked="" type="checkbox"/> | D10 | GAPDH 8  | Unknown | 29.36 |               |          |        |
| <input checked="" type="checkbox"/> | D11 | GAPDH 8  | Unknown | 28.66 |               |          |        |
| <input checked="" type="checkbox"/> | D12 | GAPDH 8  | Unknown | 27.81 |               |          |        |
| <input checked="" type="checkbox"/> | E1  | FCER1A 5 | Unknown | 26.39 |               |          |        |
| <input checked="" type="checkbox"/> | E2  | FCER1A 5 | Unknown | 26.57 |               |          |        |
| <input checked="" type="checkbox"/> | E3  | FCER1A 5 | Unknown | 26.99 |               |          |        |
| <input checked="" type="checkbox"/> | E4  | FCER1A 6 | Unknown | 28.31 |               |          |        |
| <input checked="" type="checkbox"/> | E5  | FCER1A 6 | Unknown | 28.32 |               |          |        |
| <input checked="" type="checkbox"/> | E6  | FCER1A 6 | Unknown | 26.53 |               |          |        |
| <input checked="" type="checkbox"/> | E7  | FCER1A 7 | Unknown | 28.56 |               |          |        |
| <input checked="" type="checkbox"/> | E8  | FCER1A 7 | Unknown | 28.47 |               |          |        |
| <input checked="" type="checkbox"/> | E9  | FCER1A 7 | Unknown | 27.71 |               |          |        |
| <input checked="" type="checkbox"/> | E10 | FCER1A 8 | Unknown | 28.63 |               |          |        |
| <input checked="" type="checkbox"/> | E11 | FCER1A 8 | Unknown | 28.50 |               |          |        |
| <input checked="" type="checkbox"/> | E12 | FCER1A 8 | Unknown | 27.73 |               |          |        |
| <input checked="" type="checkbox"/> | F1  | RGS1 5   | Unknown | 27.68 |               |          |        |
| <input checked="" type="checkbox"/> | F2  | RGS1 5   | Unknown | 27.77 |               |          |        |
| <input checked="" type="checkbox"/> | F3  | RGS1 5   | Unknown | 27.15 |               |          |        |
| <input checked="" type="checkbox"/> | F4  | RGS1 6   | Unknown | 32.87 |               |          |        |

## Results

| Inc                                 | Pos | Name   | Type    | CP    | Concentration | Standard | Status |
|-------------------------------------|-----|--------|---------|-------|---------------|----------|--------|
| <input checked="" type="checkbox"/> | F5  | RGS1 6 | Unknown | 35.21 |               |          |        |
| <input checked="" type="checkbox"/> | F6  | RGS1 6 | Unknown | 36.17 |               |          |        |
| <input checked="" type="checkbox"/> | F7  | RGS1 7 | Unknown | 31.79 |               |          |        |
| <input checked="" type="checkbox"/> | F8  | RGS1 7 | Unknown | 32.16 |               |          |        |
| <input checked="" type="checkbox"/> | F9  | RGS1 7 | Unknown | 31.59 |               |          |        |
| <input checked="" type="checkbox"/> | F10 | RGS1 8 | Unknown | 31.68 |               |          |        |
| <input checked="" type="checkbox"/> | F11 | RGS1 8 | Unknown | 32.18 |               |          |        |
| <input checked="" type="checkbox"/> | F12 | RGS1 8 | Unknown | 32.97 |               |          |        |
| <input checked="" type="checkbox"/> | G1  | blank  | Unknown |       |               |          |        |
| <input checked="" type="checkbox"/> | G2  | blank  | Unknown |       |               |          |        |
| <input checked="" type="checkbox"/> | G3  | blank  | Unknown |       |               |          |        |
| <input checked="" type="checkbox"/> | G4  | blank  | Unknown |       |               |          |        |
| <input checked="" type="checkbox"/> | G5  | blank  | Unknown |       |               |          |        |
| <input checked="" type="checkbox"/> | G6  | blank  | Unknown |       |               |          |        |
| <input checked="" type="checkbox"/> | G7  | blank  | Unknown |       |               |          |        |
| <input checked="" type="checkbox"/> | G8  | blank  | Unknown |       |               |          |        |
| <input checked="" type="checkbox"/> | G9  | blank  | Unknown |       |               |          |        |
| <input checked="" type="checkbox"/> | G10 | blank  | Unknown |       |               |          |        |
| <input checked="" type="checkbox"/> | G11 | blank  | Unknown |       |               |          |        |
| <input checked="" type="checkbox"/> | G12 | blank  | Unknown |       |               |          |        |
| <input checked="" type="checkbox"/> | H1  | blank  | Unknown |       |               |          |        |
| <input checked="" type="checkbox"/> | H2  | blank  | Unknown |       |               |          |        |
| <input checked="" type="checkbox"/> | H3  | blank  | Unknown |       |               |          |        |
| <input checked="" type="checkbox"/> | H4  | blank  | Unknown |       |               |          |        |
| <input checked="" type="checkbox"/> | H5  | blank  | Unknown |       |               |          |        |
| <input checked="" type="checkbox"/> | H6  | blank  | Unknown |       |               |          |        |
| <input checked="" type="checkbox"/> | H7  | blank  | Unknown |       |               |          |        |
| <input checked="" type="checkbox"/> | H8  | blank  | Unknown |       |               |          |        |
| <input checked="" type="checkbox"/> | H9  | blank  | Unknown |       |               |          |        |
| <input checked="" type="checkbox"/> | H10 | blank  | Unknown |       |               |          |        |
| <input checked="" type="checkbox"/> | H11 | blank  | Unknown |       |               |          |        |
| <input checked="" type="checkbox"/> | H12 | blank  | Unknown |       |               |          |        |

**Amplification Curves**

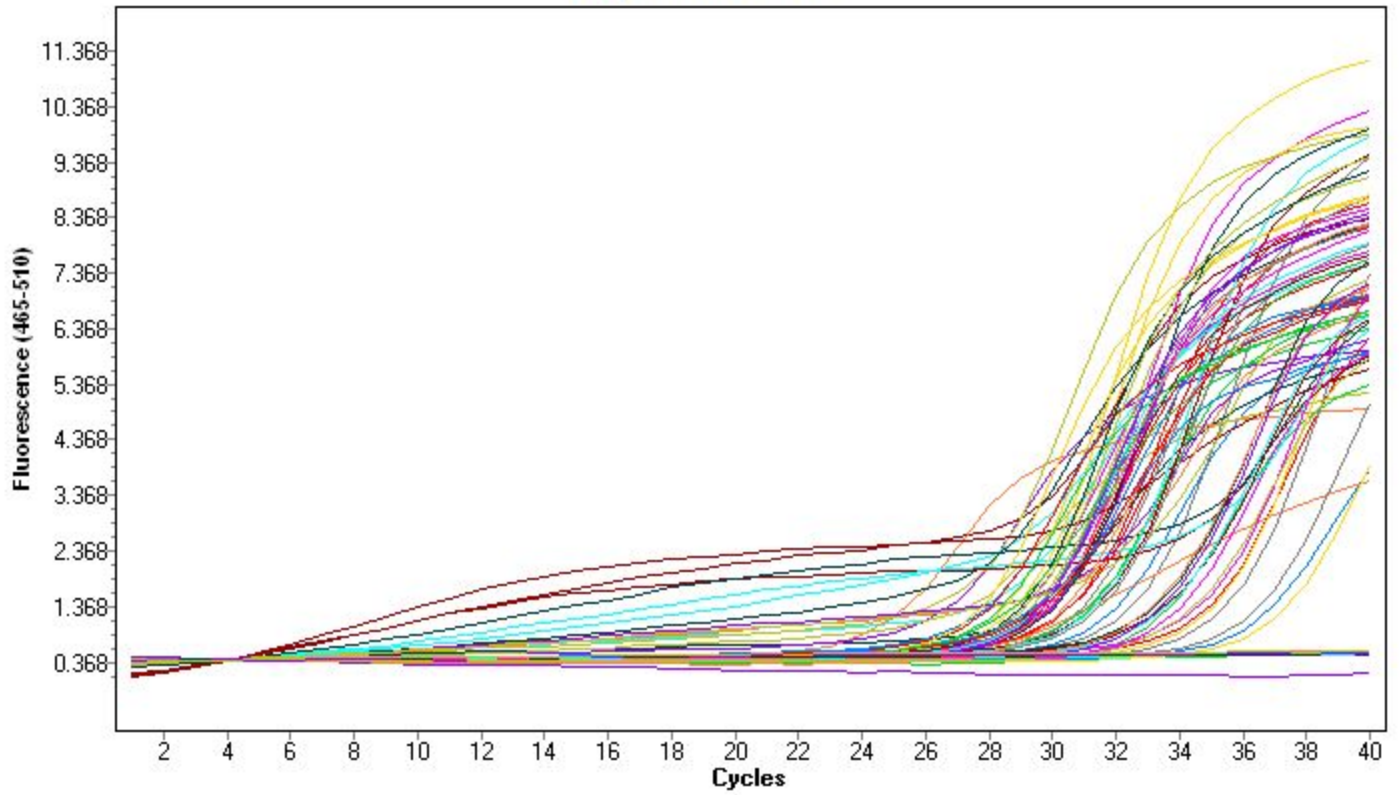

**Amplification Curves**

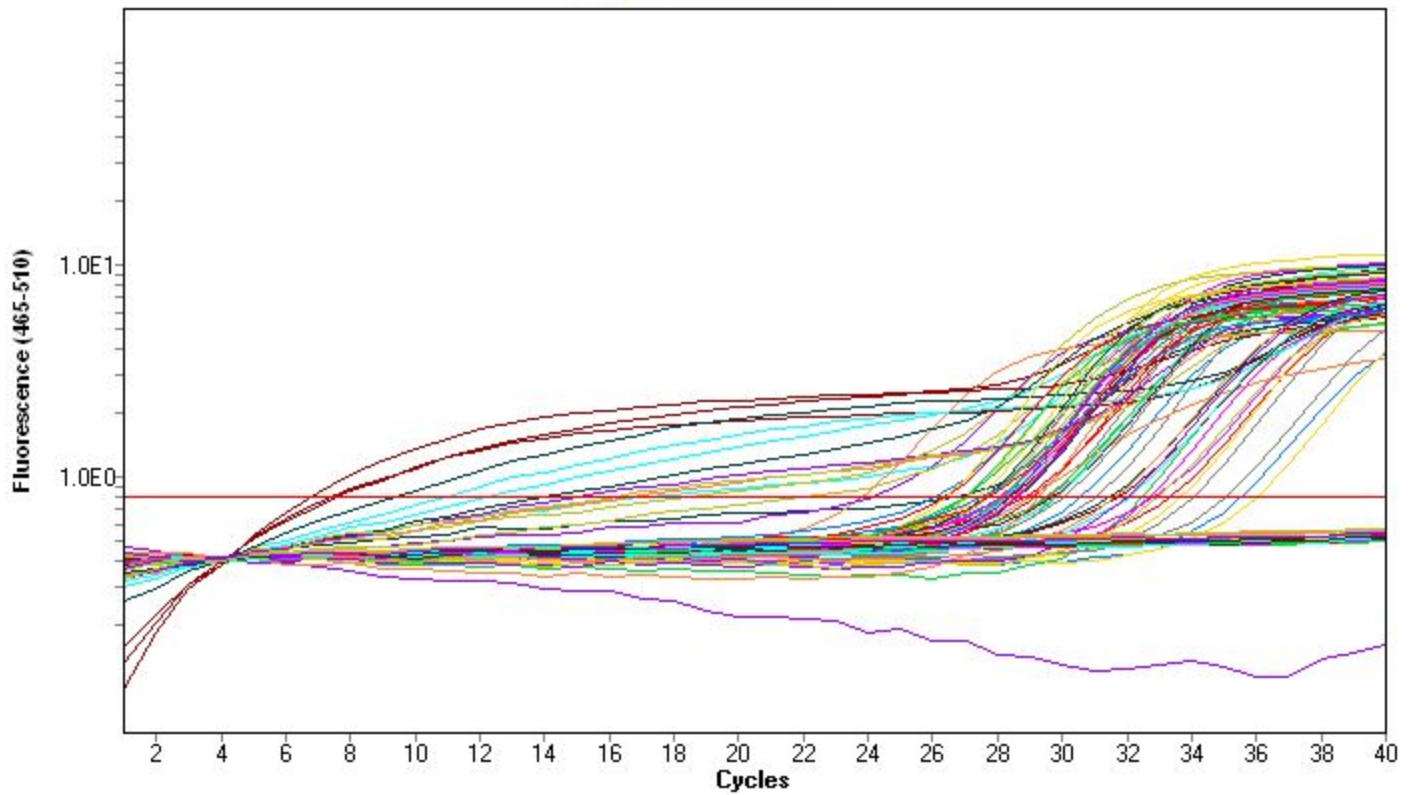

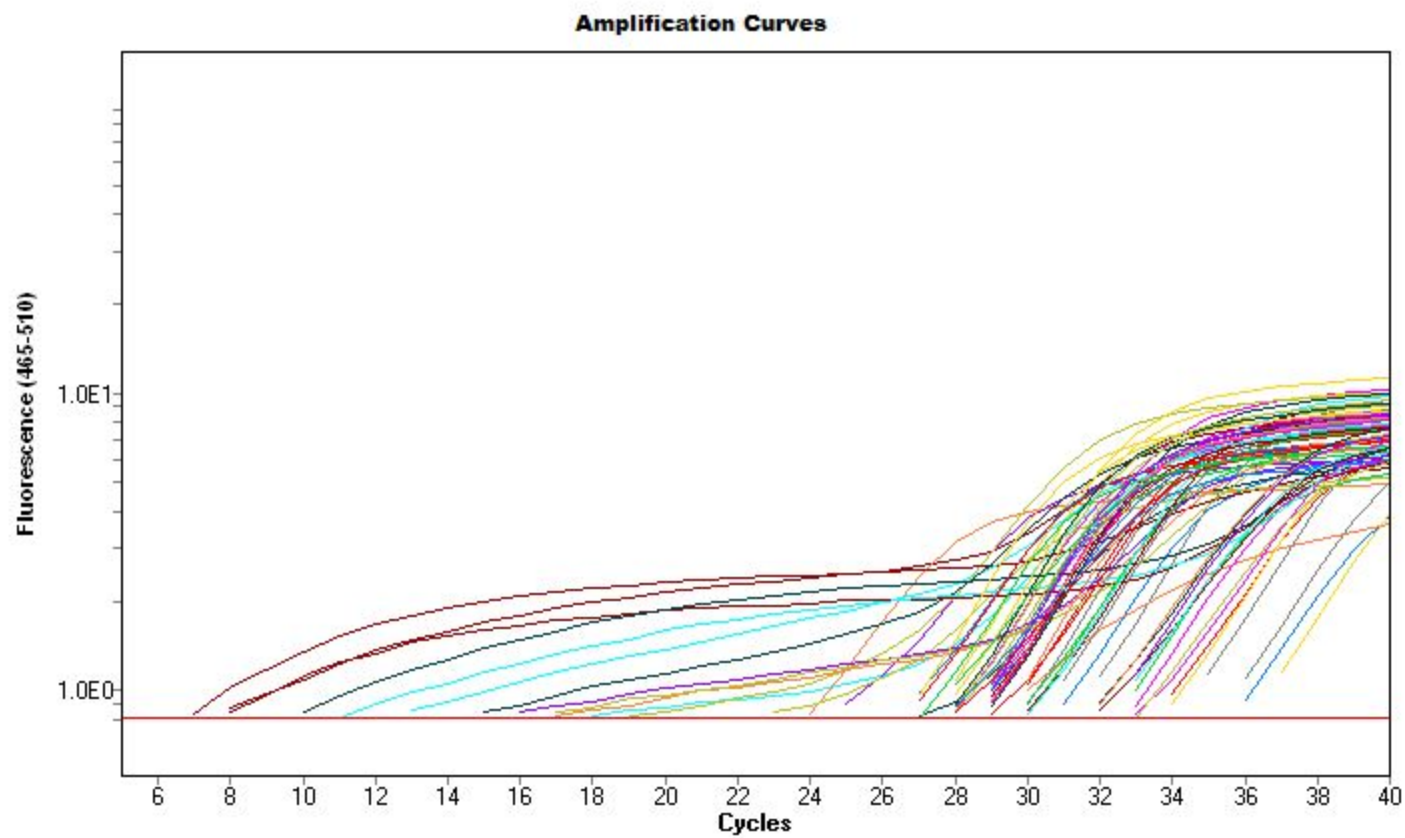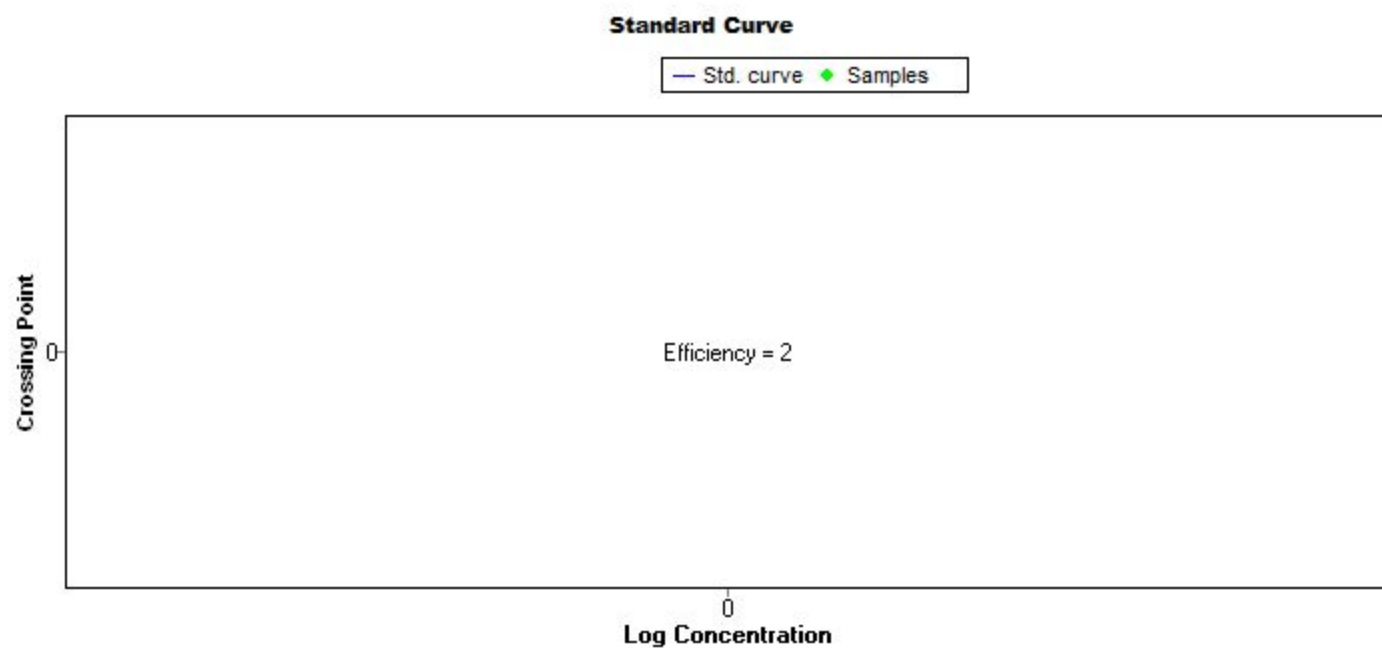

**Analysis Notes**

**Gene Scanning for All Samples (Gene Scanning)**

|               |             |                     |             |
|---------------|-------------|---------------------|-------------|
| Channel       | 465-510     | Color Compensation  | Off         |
| Program Name  | Program     |                     |             |
| Stds Settings | Auto-Group  |                     |             |
| Sensitivity   | 0.30        | Threshold (TmShift) | 5.000       |
| Pre-melt      | 70.72-71.71 | Post-melt Temp      | 88.57-89.56 |

|             |             |
|-------------|-------------|
| Subset Name | All Samples |
|-------------|-------------|

## Results

| Inc                                 | Pos. | Sample Name | Sample Type | Group    | Status |
|-------------------------------------|------|-------------|-------------|----------|--------|
| <input checked="" type="checkbox"/> | A1   | GAPDH 1     | Unknown     | 6        |        |
| <input checked="" type="checkbox"/> | A2   | GAPDH 1     | Unknown     | Negative |        |
| <input checked="" type="checkbox"/> | A3   | GAPDH 1     | Unknown     | 1        |        |
| <input checked="" type="checkbox"/> | A4   | GAPDH 2     | Unknown     | Unknown  |        |
| <input checked="" type="checkbox"/> | A5   | GAPDH 2     | Unknown     | Unknown  |        |
| <input checked="" type="checkbox"/> | A6   | GAPDH 2     | Unknown     | 6        |        |
| <input checked="" type="checkbox"/> | A7   | GAPDH 3     | Unknown     | Unknown  |        |
| <input checked="" type="checkbox"/> | A8   | GAPDH 3     | Unknown     | Unknown  |        |
| <input checked="" type="checkbox"/> | A9   | GAPDH 3     | Unknown     | 1        |        |
| <input checked="" type="checkbox"/> | A10  | GAPDH 4     | Unknown     | 3        |        |
| <input checked="" type="checkbox"/> | A11  | GAPDH 4     | Unknown     | 3        |        |
| <input checked="" type="checkbox"/> | A12  | GAPDH 4     | Unknown     | Unknown  |        |
| <input checked="" type="checkbox"/> | B1   | FCER1A 1    | Unknown     | 1        |        |
| <input checked="" type="checkbox"/> | B2   | FCER1A 1    | Unknown     | 1        |        |
| <input checked="" type="checkbox"/> | B3   | FCER1A 1    | Unknown     | Unknown  |        |
| <input checked="" type="checkbox"/> | B4   | FCER1A 2    | Unknown     | 1        |        |
| <input checked="" type="checkbox"/> | B5   | FCER1A 2    | Unknown     | Unknown  |        |
| <input checked="" type="checkbox"/> | B6   | FCER1A 2    | Unknown     | 1        |        |
| <input checked="" type="checkbox"/> | B7   | FCER1A 3    | Unknown     | 1        |        |
| <input checked="" type="checkbox"/> | B8   | FCER1A 3    | Unknown     | 1        |        |
| <input checked="" type="checkbox"/> | B9   | FCER1A 3    | Unknown     | 1        |        |
| <input checked="" type="checkbox"/> | B10  | FCER1A 4    | Unknown     | Unknown  |        |
| <input checked="" type="checkbox"/> | B11  | FCER1A 4    | Unknown     | Negative |        |
| <input checked="" type="checkbox"/> | B12  | FCER1A 4    | Unknown     | Unknown  |        |
| <input checked="" type="checkbox"/> | C1   | RGS1 1      | Unknown     | Negative |        |
| <input checked="" type="checkbox"/> | C2   | RGS1 1      | Unknown     | Unknown  |        |
| <input checked="" type="checkbox"/> | C3   | RGS1 1      | Unknown     | Unknown  |        |
| <input checked="" type="checkbox"/> | C4   | RGS1 2      | Unknown     | Unknown  |        |
| <input checked="" type="checkbox"/> | C5   | RGS1 2      | Unknown     | Unknown  |        |
| <input checked="" type="checkbox"/> | C6   | RGS1 2      | Unknown     | Unknown  |        |
| <input checked="" type="checkbox"/> | C7   | RGS1 3      | Unknown     | 2        |        |

## Results

| Inc                                 | Pos. | Sample Name | Sample Type | Group    | Status |
|-------------------------------------|------|-------------|-------------|----------|--------|
| <input checked="" type="checkbox"/> | C8   | RGS1 3      | Unknown     | 2        |        |
| <input checked="" type="checkbox"/> | C9   | RGS1 3      | Unknown     | 4        |        |
| <input checked="" type="checkbox"/> | C10  | RGS1 4      | Unknown     | 2        |        |
| <input checked="" type="checkbox"/> | C11  | RGS1 4      | Unknown     | Unknown  |        |
| <input checked="" type="checkbox"/> | C12  | RGS1 4      | Unknown     | 2        |        |
| <input checked="" type="checkbox"/> | D1   | GAPDH 5     | Unknown     | 3        |        |
| <input checked="" type="checkbox"/> | D2   | GAPDH 5     | Unknown     | Unknown  |        |
| <input checked="" type="checkbox"/> | D3   | GAPDH 5     | Unknown     | Unknown  |        |
| <input checked="" type="checkbox"/> | D4   | GAPDH 6     | Unknown     | Unknown  |        |
| <input checked="" type="checkbox"/> | D5   | GAPDH 6     | Unknown     | Unknown  |        |
| <input checked="" type="checkbox"/> | D6   | GAPDH 6     | Unknown     | Unknown  |        |
| <input checked="" type="checkbox"/> | D7   | GAPDH 7     | Unknown     | Unknown  |        |
| <input checked="" type="checkbox"/> | D8   | GAPDH 7     | Unknown     | Unknown  |        |
| <input checked="" type="checkbox"/> | D9   | GAPDH 7     | Unknown     | Unknown  |        |
| <input checked="" type="checkbox"/> | D10  | GAPDH 8     | Unknown     | Unknown  |        |
| <input checked="" type="checkbox"/> | D11  | GAPDH 8     | Unknown     | Unknown  |        |
| <input checked="" type="checkbox"/> | D12  | GAPDH 8     | Unknown     | 3        |        |
| <input checked="" type="checkbox"/> | E1   | FCER1A 5    | Unknown     | Unknown  |        |
| <input checked="" type="checkbox"/> | E2   | FCER1A 5    | Unknown     | Unknown  |        |
| <input checked="" type="checkbox"/> | E3   | FCER1A 5    | Unknown     | Unknown  |        |
| <input checked="" type="checkbox"/> | E4   | FCER1A 6    | Unknown     | 5        |        |
| <input checked="" type="checkbox"/> | E5   | FCER1A 6    | Unknown     | Unknown  |        |
| <input checked="" type="checkbox"/> | E6   | FCER1A 6    | Unknown     | 1        |        |
| <input checked="" type="checkbox"/> | E7   | FCER1A 7    | Unknown     | 5        |        |
| <input checked="" type="checkbox"/> | E8   | FCER1A 7    | Unknown     | Unknown  |        |
| <input checked="" type="checkbox"/> | E9   | FCER1A 7    | Unknown     | 1        |        |
| <input checked="" type="checkbox"/> | E10  | FCER1A 8    | Unknown     | 5        |        |
| <input checked="" type="checkbox"/> | E11  | FCER1A 8    | Unknown     | Unknown  |        |
| <input checked="" type="checkbox"/> | E12  | FCER1A 8    | Unknown     | 6        |        |
| <input checked="" type="checkbox"/> | F1   | RGS1 5      | Unknown     | 2        |        |
| <input checked="" type="checkbox"/> | F2   | RGS1 5      | Unknown     | 2        |        |
| <input checked="" type="checkbox"/> | F3   | RGS1 5      | Unknown     | 2        |        |
| <input checked="" type="checkbox"/> | F4   | RGS1 6      | Unknown     | Unknown  |        |
| <input checked="" type="checkbox"/> | F5   | RGS1 6      | Unknown     | Negative |        |
| <input checked="" type="checkbox"/> | F6   | RGS1 6      | Unknown     | Unknown  |        |
| <input checked="" type="checkbox"/> | F7   | RGS1 7      | Unknown     | 4        |        |
| <input checked="" type="checkbox"/> | F8   | RGS1 7      | Unknown     | Unknown  |        |
| <input checked="" type="checkbox"/> | F9   | RGS1 7      | Unknown     | Unknown  |        |

## Results

| Inc                                 | Pos. | Sample Name | Sample Type | Group    | Status |
|-------------------------------------|------|-------------|-------------|----------|--------|
| <input checked="" type="checkbox"/> | F10  | RGS1 8      | Unknown     | 2        |        |
| <input checked="" type="checkbox"/> | F11  | RGS1 8      | Unknown     | 2        |        |
| <input checked="" type="checkbox"/> | F12  | RGS1 8      | Unknown     | 4        |        |
| <input checked="" type="checkbox"/> | G1   | blank       | Unknown     | Negative |        |
| <input checked="" type="checkbox"/> | G2   | blank       | Unknown     | Negative |        |
| <input checked="" type="checkbox"/> | G3   | blank       | Unknown     | Negative |        |
| <input checked="" type="checkbox"/> | G4   | blank       | Unknown     | Negative |        |
| <input checked="" type="checkbox"/> | G5   | blank       | Unknown     | Negative |        |
| <input checked="" type="checkbox"/> | G6   | blank       | Unknown     | Negative |        |
| <input checked="" type="checkbox"/> | G7   | blank       | Unknown     | Negative |        |
| <input checked="" type="checkbox"/> | G8   | blank       | Unknown     | Negative |        |
| <input checked="" type="checkbox"/> | G9   | blank       | Unknown     | Negative |        |
| <input checked="" type="checkbox"/> | G10  | blank       | Unknown     | Negative |        |
| <input checked="" type="checkbox"/> | G11  | blank       | Unknown     | Negative |        |
| <input checked="" type="checkbox"/> | G12  | blank       | Unknown     | Negative |        |
| <input checked="" type="checkbox"/> | H1   | blank       | Unknown     | Negative |        |
| <input checked="" type="checkbox"/> | H2   | blank       | Unknown     | Negative |        |
| <input checked="" type="checkbox"/> | H3   | blank       | Unknown     | Negative |        |
| <input checked="" type="checkbox"/> | H4   | blank       | Unknown     | Negative |        |
| <input checked="" type="checkbox"/> | H5   | blank       | Unknown     | Negative |        |
| <input checked="" type="checkbox"/> | H6   | blank       | Unknown     | Negative |        |
| <input checked="" type="checkbox"/> | H7   | blank       | Unknown     | Negative |        |
| <input checked="" type="checkbox"/> | H8   | blank       | Unknown     | Negative |        |
| <input checked="" type="checkbox"/> | H9   | blank       | Unknown     | Negative |        |
| <input checked="" type="checkbox"/> | H10  | blank       | Unknown     | Negative |        |
| <input checked="" type="checkbox"/> | H11  | blank       | Unknown     | Negative |        |
| <input checked="" type="checkbox"/> | H12  | blank       | Unknown     | Negative |        |

## Group 1

| Inc                                 | Pos | Sample Name | Sample Type |
|-------------------------------------|-----|-------------|-------------|
| <input checked="" type="checkbox"/> | A3  | GAPDH 1     | Unknown     |
| <input checked="" type="checkbox"/> | A9  | GAPDH 3     | Unknown     |
| <input checked="" type="checkbox"/> | B1  | FCER1A 1    | Unknown     |
| <input checked="" type="checkbox"/> | B2  | FCER1A 1    | Unknown     |
| <input checked="" type="checkbox"/> | B4  | FCER1A 2    | Unknown     |
| <input checked="" type="checkbox"/> | B6  | FCER1A 2    | Unknown     |
| <input checked="" type="checkbox"/> | B7  | FCER1A 3    | Unknown     |
| <input checked="" type="checkbox"/> | B8  | FCER1A 3    | Unknown     |
| <input checked="" type="checkbox"/> | B9  | FCER1A 3    | Unknown     |



| <b>Group 1</b>                      |     |             |             |
|-------------------------------------|-----|-------------|-------------|
| Inc                                 | Pos | Sample Name | Sample Type |
| <input checked="" type="checkbox"/> | E6  | FCER1A 6    | Unknown     |
| <input checked="" type="checkbox"/> | E9  | FCER1A 7    | Unknown     |
| <b>Group 2</b>                      |     |             |             |
| Inc                                 | Pos | Sample Name | Sample Type |
| <input checked="" type="checkbox"/> | C7  | RGS1 3      | Unknown     |
| <input checked="" type="checkbox"/> | C8  | RGS1 3      | Unknown     |
| <input checked="" type="checkbox"/> | C10 | RGS1 4      | Unknown     |
| <input checked="" type="checkbox"/> | C12 | RGS1 4      | Unknown     |
| <input checked="" type="checkbox"/> | F1  | RGS1 5      | Unknown     |
| <input checked="" type="checkbox"/> | F2  | RGS1 5      | Unknown     |
| <input checked="" type="checkbox"/> | F3  | RGS1 5      | Unknown     |
| <input checked="" type="checkbox"/> | F10 | RGS1 8      | Unknown     |
| <input checked="" type="checkbox"/> | F11 | RGS1 8      | Unknown     |
| <b>Group 3</b>                      |     |             |             |
| Inc                                 | Pos | Sample Name | Sample Type |
| <input checked="" type="checkbox"/> | A10 | GAPDH 4     | Unknown     |
| <input checked="" type="checkbox"/> | A11 | GAPDH 4     | Unknown     |
| <input checked="" type="checkbox"/> | D1  | GAPDH 5     | Unknown     |
| <input checked="" type="checkbox"/> | D12 | GAPDH 8     | Unknown     |
| <b>Group 4</b>                      |     |             |             |
| Inc                                 | Pos | Sample Name | Sample Type |
| <input checked="" type="checkbox"/> | C9  | RGS1 3      | Unknown     |
| <input checked="" type="checkbox"/> | F7  | RGS1 7      | Unknown     |
| <input checked="" type="checkbox"/> | F12 | RGS1 8      | Unknown     |
| <b>Group 5</b>                      |     |             |             |
| Inc                                 | Pos | Sample Name | Sample Type |
| <input checked="" type="checkbox"/> | E4  | FCER1A 6    | Unknown     |
| <input checked="" type="checkbox"/> | E7  | FCER1A 7    | Unknown     |
| <input checked="" type="checkbox"/> | E10 | FCER1A 8    | Unknown     |
| <b>Group 6</b>                      |     |             |             |
| Inc                                 | Pos | Sample Name | Sample Type |
| <input checked="" type="checkbox"/> | A1  | GAPDH 1     | Unknown     |
| <input checked="" type="checkbox"/> | A6  | GAPDH 2     | Unknown     |
| <input checked="" type="checkbox"/> | E12 | FCER1A 8    | Unknown     |

| Group Negative                      |     |             |             |
|-------------------------------------|-----|-------------|-------------|
| Inc                                 | Pos | Sample Name | Sample Type |
| <input checked="" type="checkbox"/> | A2  | GAPDH 1     | Unknown     |
| <input checked="" type="checkbox"/> | B11 | FCER1A 4    | Unknown     |
| <input checked="" type="checkbox"/> | C1  | RGS1 1      | Unknown     |
| <input checked="" type="checkbox"/> | F5  | RGS1 6      | Unknown     |
| <input checked="" type="checkbox"/> | G1  | blank       | Unknown     |
| <input checked="" type="checkbox"/> | G2  | blank       | Unknown     |
| <input checked="" type="checkbox"/> | G3  | blank       | Unknown     |
| <input checked="" type="checkbox"/> | G4  | blank       | Unknown     |
| <input checked="" type="checkbox"/> | G5  | blank       | Unknown     |
| <input checked="" type="checkbox"/> | G6  | blank       | Unknown     |
| <input checked="" type="checkbox"/> | G7  | blank       | Unknown     |
| <input checked="" type="checkbox"/> | G8  | blank       | Unknown     |
| <input checked="" type="checkbox"/> | G9  | blank       | Unknown     |
| <input checked="" type="checkbox"/> | G10 | blank       | Unknown     |
| <input checked="" type="checkbox"/> | G11 | blank       | Unknown     |
| <input checked="" type="checkbox"/> | G12 | blank       | Unknown     |
| <input checked="" type="checkbox"/> | H1  | blank       | Unknown     |
| <input checked="" type="checkbox"/> | H2  | blank       | Unknown     |
| <input checked="" type="checkbox"/> | H3  | blank       | Unknown     |
| <input checked="" type="checkbox"/> | H4  | blank       | Unknown     |
| <input checked="" type="checkbox"/> | H5  | blank       | Unknown     |
| <input checked="" type="checkbox"/> | H6  | blank       | Unknown     |
| <input checked="" type="checkbox"/> | H7  | blank       | Unknown     |
| <input checked="" type="checkbox"/> | H8  | blank       | Unknown     |
| <input checked="" type="checkbox"/> | H9  | blank       | Unknown     |
| <input checked="" type="checkbox"/> | H10 | blank       | Unknown     |
| <input checked="" type="checkbox"/> | H11 | blank       | Unknown     |
| <input checked="" type="checkbox"/> | H12 | blank       | Unknown     |
| Group Unknown                       |     |             |             |
| Inc                                 | Pos | Sample Name | Sample Type |
| <input checked="" type="checkbox"/> | A4  | GAPDH 2     | Unknown     |
| <input checked="" type="checkbox"/> | A5  | GAPDH 2     | Unknown     |
| <input checked="" type="checkbox"/> | A7  | GAPDH 3     | Unknown     |
| <input checked="" type="checkbox"/> | A8  | GAPDH 3     | Unknown     |
| <input checked="" type="checkbox"/> | A12 | GAPDH 4     | Unknown     |
| <input checked="" type="checkbox"/> | B3  | FCER1A 1    | Unknown     |
| <input checked="" type="checkbox"/> | B5  | FCER1A 2    | Unknown     |
| <input checked="" type="checkbox"/> | B10 | FCER1A 4    | Unknown     |

| Group Unknown                       |     |             |             |
|-------------------------------------|-----|-------------|-------------|
| Inc                                 | Pos | Sample Name | Sample Type |
| <input checked="" type="checkbox"/> | B12 | FCER1A 4    | Unknown     |
| <input checked="" type="checkbox"/> | C2  | RGS1 1      | Unknown     |
| <input checked="" type="checkbox"/> | C3  | RGS1 1      | Unknown     |
| <input checked="" type="checkbox"/> | C4  | RGS1 2      | Unknown     |
| <input checked="" type="checkbox"/> | C5  | RGS1 2      | Unknown     |
| <input checked="" type="checkbox"/> | C6  | RGS1 2      | Unknown     |
| <input checked="" type="checkbox"/> | C11 | RGS1 4      | Unknown     |
| <input checked="" type="checkbox"/> | D2  | GAPDH 5     | Unknown     |
| <input checked="" type="checkbox"/> | D3  | GAPDH 5     | Unknown     |
| <input checked="" type="checkbox"/> | D4  | GAPDH 6     | Unknown     |
| <input checked="" type="checkbox"/> | D5  | GAPDH 6     | Unknown     |
| <input checked="" type="checkbox"/> | D6  | GAPDH 6     | Unknown     |
| <input checked="" type="checkbox"/> | D7  | GAPDH 7     | Unknown     |
| <input checked="" type="checkbox"/> | D8  | GAPDH 7     | Unknown     |
| <input checked="" type="checkbox"/> | D9  | GAPDH 7     | Unknown     |
| <input checked="" type="checkbox"/> | D10 | GAPDH 8     | Unknown     |
| <input checked="" type="checkbox"/> | D11 | GAPDH 8     | Unknown     |
| <input checked="" type="checkbox"/> | E1  | FCER1A 5    | Unknown     |
| <input checked="" type="checkbox"/> | E2  | FCER1A 5    | Unknown     |
| <input checked="" type="checkbox"/> | E3  | FCER1A 5    | Unknown     |
| <input checked="" type="checkbox"/> | E5  | FCER1A 6    | Unknown     |
| <input checked="" type="checkbox"/> | E8  | FCER1A 7    | Unknown     |
| <input checked="" type="checkbox"/> | E11 | FCER1A 8    | Unknown     |
| <input checked="" type="checkbox"/> | F4  | RGS1 6      | Unknown     |
| <input checked="" type="checkbox"/> | F6  | RGS1 6      | Unknown     |
| <input checked="" type="checkbox"/> | F8  | RGS1 7      | Unknown     |
| <input checked="" type="checkbox"/> | F9  | RGS1 7      | Unknown     |

**Melting Curves**

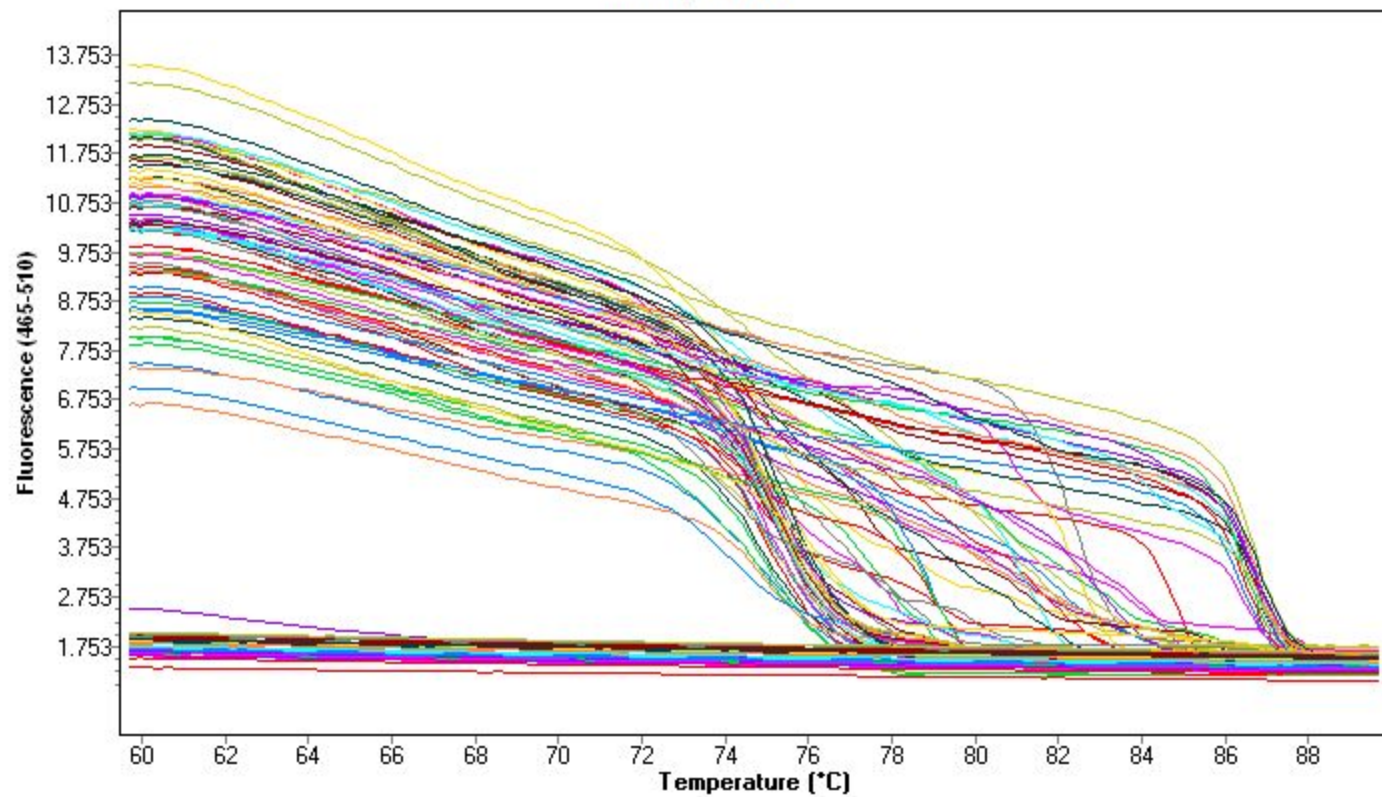

**Normalized Melting Curves**

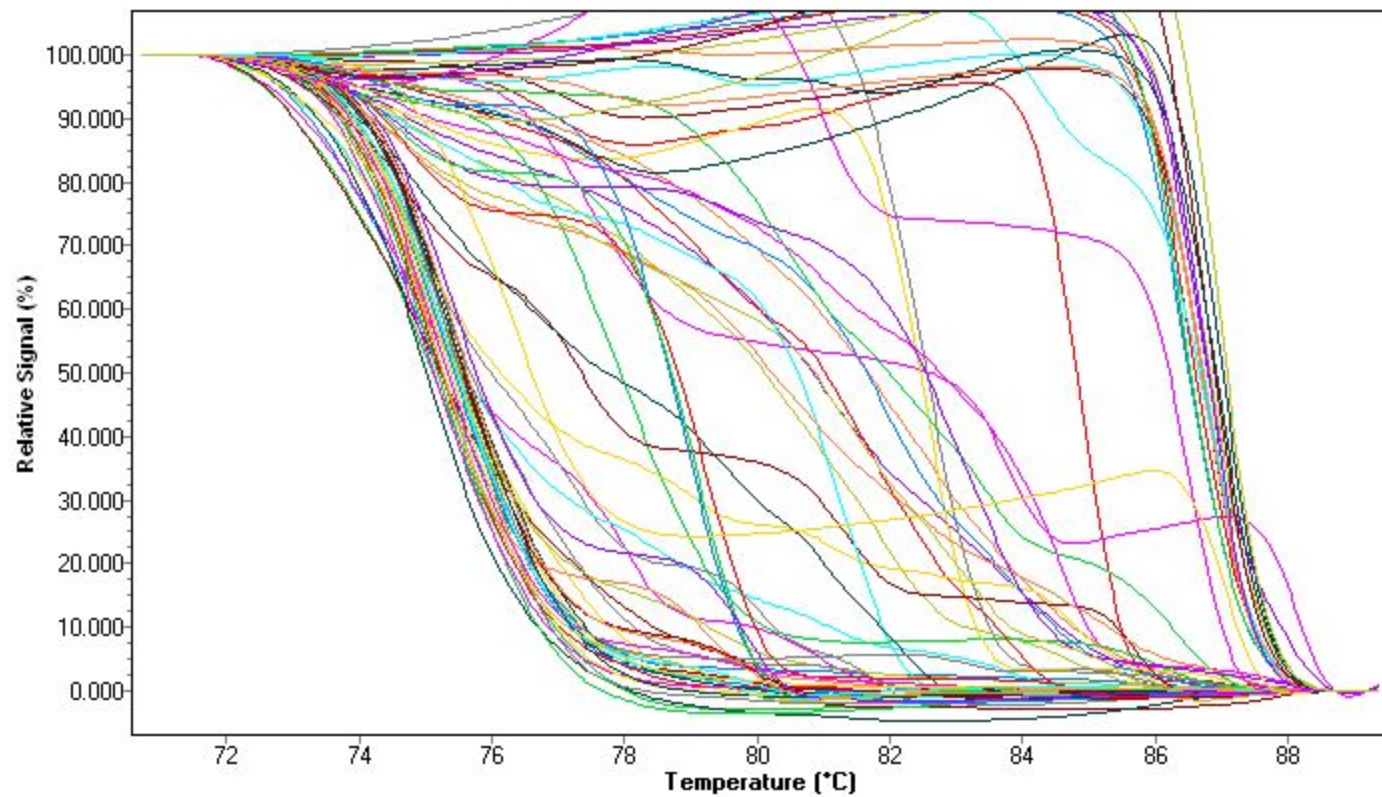

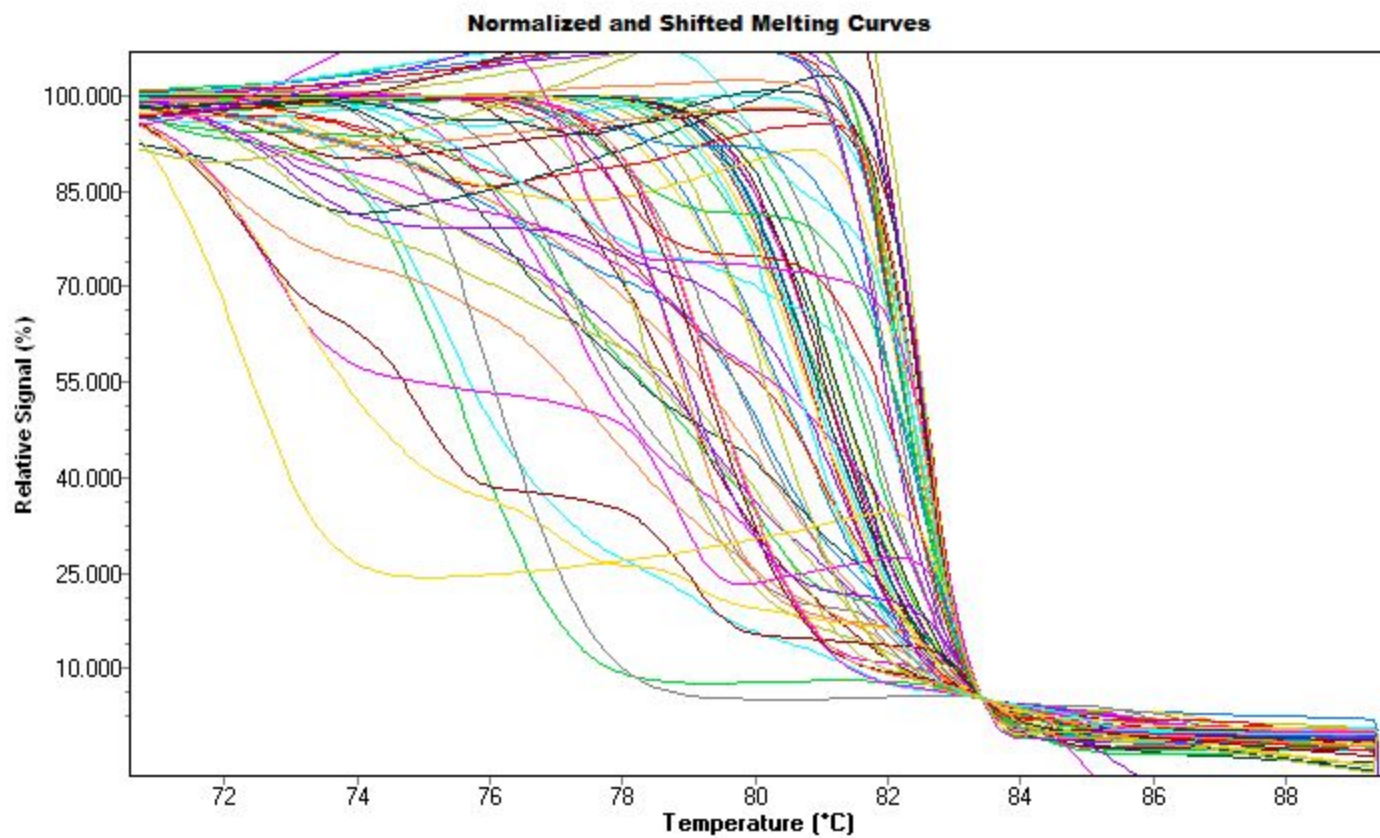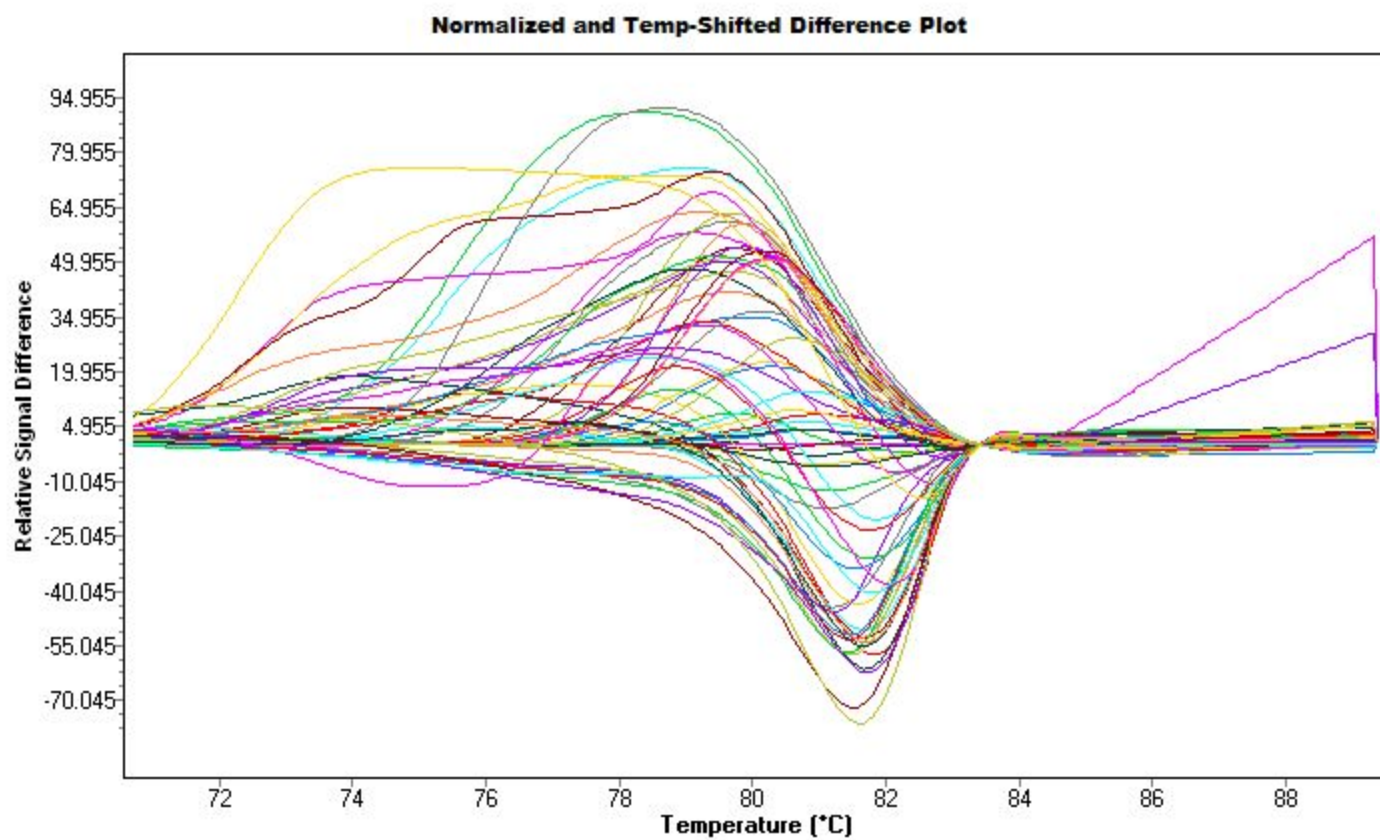

**Analysis Notes**

## Melt Curve Genotyping for All Samples (Melt Curve Genotyping)

|                |            |                    |       |
|----------------|------------|--------------------|-------|
| Channel        | 465-510    | Color Compensation | Off   |
| Program Name   | Program    |                    |       |
| Std's Settings | Auto-Group |                    |       |
| Sensitivity    | Normal     | Temp Range         | 62-86 |
| Score          | 0.7        | Res                | 0.1   |

|             |             |
|-------------|-------------|
| Subset Name | All Samples |
|-------------|-------------|

### Results

| Inc                                 | Pos. | Sample Name | Sample Type | Group    | Score | Resolution | Status |
|-------------------------------------|------|-------------|-------------|----------|-------|------------|--------|
| <input checked="" type="checkbox"/> | A1   | GAPDH 1     | Unknown     | 1        | 0.95  | 0.79       |        |
| <input checked="" type="checkbox"/> | A2   | GAPDH 1     | Unknown     | Unknown  | 0.65  | 0.18       |        |
| <input checked="" type="checkbox"/> | A3   | GAPDH 1     | Unknown     | 1        | 0.95  | 0.80       |        |
| <input checked="" type="checkbox"/> | A4   | GAPDH 2     | Unknown     | 1        | 0.86  | 0.53       |        |
| <input checked="" type="checkbox"/> | A5   | GAPDH 2     | Unknown     | 1        | 0.89  | 0.40       |        |
| <input checked="" type="checkbox"/> | A6   | GAPDH 2     | Unknown     | 1        | 0.96  | 0.65       |        |
| <input checked="" type="checkbox"/> | A7   | GAPDH 3     | Unknown     | 1        | 0.93  | 0.72       |        |
| <input checked="" type="checkbox"/> | A8   | GAPDH 3     | Unknown     | 1        | 0.90  | 0.59       |        |
| <input checked="" type="checkbox"/> | A9   | GAPDH 3     | Unknown     | 1        | 0.97  | 0.83       |        |
| <input checked="" type="checkbox"/> | A10  | GAPDH 4     | Unknown     | 3        | 0.97  | 0.28       |        |
| <input checked="" type="checkbox"/> | A11  | GAPDH 4     | Unknown     | 3        | 1.00  | 0.40       |        |
| <input checked="" type="checkbox"/> | A12  | GAPDH 4     | Unknown     | 3        | 0.98  | 0.50       |        |
| <input checked="" type="checkbox"/> | B1   | FCER1A 1    | Unknown     | 1        | 0.96  | 0.71       |        |
| <input checked="" type="checkbox"/> | B2   | FCER1A 1    | Unknown     | 1        | 0.97  | 0.78       |        |
| <input checked="" type="checkbox"/> | B3   | FCER1A 1    | Unknown     | 1        | 0.95  | 0.77       |        |
| <input checked="" type="checkbox"/> | B4   | FCER1A 2    | Unknown     | 1        | 0.91  | 0.73       |        |
| <input checked="" type="checkbox"/> | B5   | FCER1A 2    | Unknown     | 1        | 0.94  | 0.71       |        |
| <input checked="" type="checkbox"/> | B6   | FCER1A 2    | Unknown     | 1        | 0.96  | 0.73       |        |
| <input checked="" type="checkbox"/> | B7   | FCER1A 3    | Unknown     | 1        | 0.97  | 0.66       |        |
| <input checked="" type="checkbox"/> | B8   | FCER1A 3    | Unknown     | 1        | 0.97  | 0.69       |        |
| <input checked="" type="checkbox"/> | B9   | FCER1A 3    | Unknown     | 1        | 0.97  | 0.63       |        |
| <input checked="" type="checkbox"/> | B10  | FCER1A 4    | Unknown     | 1        | 0.95  | 0.72       |        |
| <input checked="" type="checkbox"/> | B11  | FCER1A 4    | Unknown     | Negative | 1.00  | 1.00       |        |
| <input checked="" type="checkbox"/> | B12  | FCER1A 4    | Unknown     | 1        | 1.00  | 0.71       |        |
| <input checked="" type="checkbox"/> | C1   | RGS1 1      | Unknown     | 1        | 0.89  | 0.60       |        |
| <input checked="" type="checkbox"/> | C2   | RGS1 1      | Unknown     | 2        | 0.78  | 0.19       |        |
| <input checked="" type="checkbox"/> | C3   | RGS1 1      | Unknown     | 4        | 0.92  | 0.13       |        |
| <input checked="" type="checkbox"/> | C4   | RGS1 2      | Unknown     | 3        | 0.84  | 0.22       |        |
| <input checked="" type="checkbox"/> | C5   | RGS1 2      | Unknown     | 5        | 1.00  | 0.51       |        |
| <input checked="" type="checkbox"/> | C6   | RGS1 2      | Unknown     | Unknown  | 0.75  | 0.03       |        |
| <input checked="" type="checkbox"/> | C7   | RGS1 3      | Unknown     | 2        | 0.95  | 0.37       |        |

## Results

| Inc                                 | Pos. | Sample Name | Sample Type | Group   | Score | Resolution | Status |
|-------------------------------------|------|-------------|-------------|---------|-------|------------|--------|
| <input checked="" type="checkbox"/> | C8   | RGS1 3      | Unknown     | 2       | 0.98  | 0.36       |        |
| <input checked="" type="checkbox"/> | C9   | RGS1 3      | Unknown     | 2       | 0.91  | 0.41       |        |
| <input checked="" type="checkbox"/> | C10  | RGS1 4      | Unknown     | 2       | 0.97  | 0.32       |        |
| <input checked="" type="checkbox"/> | C11  | RGS1 4      | Unknown     | 2       | 0.99  | 0.39       |        |
| <input checked="" type="checkbox"/> | C12  | RGS1 4      | Unknown     | 2       | 1.00  | 0.45       |        |
| <input checked="" type="checkbox"/> | D1   | GAPDH 5     | Unknown     | 3       | 0.96  | 0.36       |        |
| <input checked="" type="checkbox"/> | D2   | GAPDH 5     | Unknown     | 3       | 0.94  | 0.35       |        |
| <input checked="" type="checkbox"/> | D3   | GAPDH 5     | Unknown     | 3       | 0.89  | 0.16       |        |
| <input checked="" type="checkbox"/> | D4   | GAPDH 6     | Unknown     | 3       | 0.94  | 0.25       |        |
| <input checked="" type="checkbox"/> | D5   | GAPDH 6     | Unknown     | 1       | 0.97  | 0.56       |        |
| <input checked="" type="checkbox"/> | D6   | GAPDH 6     | Unknown     | 1       | 0.80  | 0.40       |        |
| <input checked="" type="checkbox"/> | D7   | GAPDH 7     | Unknown     | Unknown | 0.62  |            |        |
| <input checked="" type="checkbox"/> | D8   | GAPDH 7     | Unknown     | 3       | 0.89  | 0.32       |        |
| <input checked="" type="checkbox"/> | D9   | GAPDH 7     | Unknown     | 3       | 0.75  | 0.16       |        |
| <input checked="" type="checkbox"/> | D10  | GAPDH 8     | Unknown     | 3       | 0.93  | 0.37       |        |
| <input checked="" type="checkbox"/> | D11  | GAPDH 8     | Unknown     | 3       | 0.85  | 0.11       |        |
| <input checked="" type="checkbox"/> | D12  | GAPDH 8     | Unknown     | 3       | 0.93  | 0.36       |        |
| <input checked="" type="checkbox"/> | E1   | FCER1A 5    | Unknown     | 4       | 1.00  | 0.53       |        |
| <input checked="" type="checkbox"/> | E2   | FCER1A 5    | Unknown     | Unknown | 0.73  | 0.03       |        |
| <input checked="" type="checkbox"/> | E3   | FCER1A 5    | Unknown     | 4       | 0.90  | 0.29       |        |
| <input checked="" type="checkbox"/> | E4   | FCER1A 6    | Unknown     | 1       | 0.98  | 0.74       |        |
| <input checked="" type="checkbox"/> | E5   | FCER1A 6    | Unknown     | 1       | 0.97  | 0.71       |        |
| <input checked="" type="checkbox"/> | E6   | FCER1A 6    | Unknown     | 1       | 0.97  | 0.67       |        |
| <input checked="" type="checkbox"/> | E7   | FCER1A 7    | Unknown     | 1       | 0.98  | 0.67       |        |
| <input checked="" type="checkbox"/> | E8   | FCER1A 7    | Unknown     | 1       | 0.98  | 0.72       |        |
| <input checked="" type="checkbox"/> | E9   | FCER1A 7    | Unknown     | 1       | 0.96  | 0.64       |        |
| <input checked="" type="checkbox"/> | E10  | FCER1A 8    | Unknown     | 1       | 0.98  | 0.66       |        |
| <input checked="" type="checkbox"/> | E11  | FCER1A 8    | Unknown     | 1       | 0.96  | 0.59       |        |
| <input checked="" type="checkbox"/> | E12  | FCER1A 8    | Unknown     | 1       | 0.98  | 0.79       |        |
| <input checked="" type="checkbox"/> | F1   | RGS1 5      | Unknown     | 2       | 0.97  | 0.44       |        |
| <input checked="" type="checkbox"/> | F2   | RGS1 5      | Unknown     | 2       | 0.98  | 0.42       |        |
| <input checked="" type="checkbox"/> | F3   | RGS1 5      | Unknown     | 2       | 0.96  | 0.49       |        |
| <input checked="" type="checkbox"/> | F4   | RGS1 6      | Unknown     | 6       | 1.00  | 0.40       |        |
| <input checked="" type="checkbox"/> | F5   | RGS1 6      | Unknown     | Unknown | 0.67  | 0.26       |        |
| <input checked="" type="checkbox"/> | F6   | RGS1 6      | Unknown     | 1       | 0.87  | 0.42       |        |
| <input checked="" type="checkbox"/> | F7   | RGS1 7      | Unknown     | 2       | 0.97  | 0.52       |        |
| <input checked="" type="checkbox"/> | F8   | RGS1 7      | Unknown     | 2       | 0.89  | 0.23       |        |
| <input checked="" type="checkbox"/> | F9   | RGS1 7      | Unknown     | 2       | 0.95  | 0.29       |        |



## Results

| Inc                                 | Pos. | Sample Name | Sample Type | Group    | Score | Resolution | Status |
|-------------------------------------|------|-------------|-------------|----------|-------|------------|--------|
| <input checked="" type="checkbox"/> | F10  | RGS1 8      | Unknown     | 2        | 0.98  | 0.43       |        |
| <input checked="" type="checkbox"/> | F11  | RGS1 8      | Unknown     | 2        | 0.97  | 0.44       |        |
| <input checked="" type="checkbox"/> | F12  | RGS1 8      | Unknown     | 2        | 0.93  | 0.53       |        |
| <input checked="" type="checkbox"/> | G1   | blank       | Unknown     | Negative | 1.00  | 1.00       |        |
| <input checked="" type="checkbox"/> | G2   | blank       | Unknown     | Negative | 1.00  | 1.00       |        |
| <input checked="" type="checkbox"/> | G3   | blank       | Unknown     | Negative | 1.00  | 1.00       |        |
| <input checked="" type="checkbox"/> | G4   | blank       | Unknown     | Negative | 1.00  | 1.00       |        |
| <input checked="" type="checkbox"/> | G5   | blank       | Unknown     | Negative | 1.00  | 1.00       |        |
| <input checked="" type="checkbox"/> | G6   | blank       | Unknown     | Negative | 1.00  | 1.00       |        |
| <input checked="" type="checkbox"/> | G7   | blank       | Unknown     | Negative | 1.00  | 1.00       |        |
| <input checked="" type="checkbox"/> | G8   | blank       | Unknown     | Negative | 1.00  | 1.00       |        |
| <input checked="" type="checkbox"/> | G9   | blank       | Unknown     | Negative | 1.00  | 1.00       |        |
| <input checked="" type="checkbox"/> | G10  | blank       | Unknown     | Negative | 1.00  | 1.00       |        |
| <input checked="" type="checkbox"/> | G11  | blank       | Unknown     | Negative | 1.00  | 1.00       |        |
| <input checked="" type="checkbox"/> | G12  | blank       | Unknown     | Negative | 1.00  | 1.00       |        |
| <input checked="" type="checkbox"/> | H1   | blank       | Unknown     | Negative | 1.00  | 1.00       |        |
| <input checked="" type="checkbox"/> | H2   | blank       | Unknown     | Negative | 1.00  | 1.00       |        |
| <input checked="" type="checkbox"/> | H3   | blank       | Unknown     | Negative | 1.00  | 1.00       |        |
| <input checked="" type="checkbox"/> | H4   | blank       | Unknown     | Negative | 1.00  | 1.00       |        |
| <input checked="" type="checkbox"/> | H5   | blank       | Unknown     | Negative | 1.00  | 1.00       |        |
| <input checked="" type="checkbox"/> | H6   | blank       | Unknown     | Negative | 1.00  | 1.00       |        |
| <input checked="" type="checkbox"/> | H7   | blank       | Unknown     | Negative | 1.00  | 1.00       |        |
| <input checked="" type="checkbox"/> | H8   | blank       | Unknown     | Negative | 1.00  | 1.00       |        |
| <input checked="" type="checkbox"/> | H9   | blank       | Unknown     | Negative | 1.00  | 1.00       |        |
| <input checked="" type="checkbox"/> | H10  | blank       | Unknown     | Negative | 1.00  | 1.00       |        |
| <input checked="" type="checkbox"/> | H11  | blank       | Unknown     | Negative | 1.00  | 1.00       |        |
| <input checked="" type="checkbox"/> | H12  | blank       | Unknown     | Negative | 1.00  | 1.00       |        |

## Group 1

| Inc                                 | Pos | Sample Name | Sample Type | Score | Resolution | Status |
|-------------------------------------|-----|-------------|-------------|-------|------------|--------|
| <input checked="" type="checkbox"/> | A1  | GAPDH 1     | Unknown     | 0.95  | 0.79       |        |
| <input checked="" type="checkbox"/> | A3  | GAPDH 1     | Unknown     | 0.95  | 0.80       |        |
| <input checked="" type="checkbox"/> | A4  | GAPDH 2     | Unknown     | 0.86  | 0.53       |        |
| <input checked="" type="checkbox"/> | A5  | GAPDH 2     | Unknown     | 0.89  | 0.40       |        |
| <input checked="" type="checkbox"/> | A6  | GAPDH 2     | Unknown     | 0.96  | 0.65       |        |
| <input checked="" type="checkbox"/> | A7  | GAPDH 3     | Unknown     | 0.93  | 0.72       |        |
| <input checked="" type="checkbox"/> | A8  | GAPDH 3     | Unknown     | 0.90  | 0.59       |        |
| <input checked="" type="checkbox"/> | A9  | GAPDH 3     | Unknown     | 0.97  | 0.83       |        |



**Group 1**

| Inc                                 | Pos | Sample Name | Sample Type | Score | Resolution | Status |
|-------------------------------------|-----|-------------|-------------|-------|------------|--------|
| <input checked="" type="checkbox"/> | B1  | FCER1A 1    | Unknown     | 0.96  | 0.71       |        |
| <input checked="" type="checkbox"/> | B2  | FCER1A 1    | Unknown     | 0.97  | 0.78       |        |
| <input checked="" type="checkbox"/> | B3  | FCER1A 1    | Unknown     | 0.95  | 0.77       |        |
| <input checked="" type="checkbox"/> | B4  | FCER1A 2    | Unknown     | 0.91  | 0.73       |        |
| <input checked="" type="checkbox"/> | B5  | FCER1A 2    | Unknown     | 0.94  | 0.71       |        |
| <input checked="" type="checkbox"/> | B6  | FCER1A 2    | Unknown     | 0.96  | 0.73       |        |
| <input checked="" type="checkbox"/> | B7  | FCER1A 3    | Unknown     | 0.97  | 0.66       |        |
| <input checked="" type="checkbox"/> | B8  | FCER1A 3    | Unknown     | 0.97  | 0.69       |        |
| <input checked="" type="checkbox"/> | B9  | FCER1A 3    | Unknown     | 0.97  | 0.63       |        |
| <input checked="" type="checkbox"/> | B10 | FCER1A 4    | Unknown     | 0.95  | 0.72       |        |
| <input checked="" type="checkbox"/> | B12 | FCER1A 4    | Unknown     | 1.00  | 0.71       |        |
| <input checked="" type="checkbox"/> | C1  | RGS1 1      | Unknown     | 0.89  | 0.60       |        |
| <input checked="" type="checkbox"/> | D5  | GAPDH 6     | Unknown     | 0.97  | 0.56       |        |
| <input checked="" type="checkbox"/> | D6  | GAPDH 6     | Unknown     | 0.80  | 0.40       |        |
| <input checked="" type="checkbox"/> | E4  | FCER1A 6    | Unknown     | 0.98  | 0.74       |        |
| <input checked="" type="checkbox"/> | E5  | FCER1A 6    | Unknown     | 0.97  | 0.71       |        |
| <input checked="" type="checkbox"/> | E6  | FCER1A 6    | Unknown     | 0.97  | 0.67       |        |
| <input checked="" type="checkbox"/> | E7  | FCER1A 7    | Unknown     | 0.98  | 0.67       |        |
| <input checked="" type="checkbox"/> | E8  | FCER1A 7    | Unknown     | 0.98  | 0.72       |        |
| <input checked="" type="checkbox"/> | E9  | FCER1A 7    | Unknown     | 0.96  | 0.64       |        |
| <input checked="" type="checkbox"/> | E10 | FCER1A 8    | Unknown     | 0.98  | 0.66       |        |
| <input checked="" type="checkbox"/> | E11 | FCER1A 8    | Unknown     | 0.96  | 0.59       |        |
| <input checked="" type="checkbox"/> | E12 | FCER1A 8    | Unknown     | 0.98  | 0.79       |        |
| <input checked="" type="checkbox"/> | F6  | RGS1 6      | Unknown     | 0.87  | 0.42       |        |

**Group 2**

| Inc                                 | Pos | Sample Name | Sample Type | Score | Resolution | Status |
|-------------------------------------|-----|-------------|-------------|-------|------------|--------|
| <input checked="" type="checkbox"/> | C2  | RGS1 1      | Unknown     | 0.78  | 0.19       |        |
| <input checked="" type="checkbox"/> | C7  | RGS1 3      | Unknown     | 0.95  | 0.37       |        |
| <input checked="" type="checkbox"/> | C8  | RGS1 3      | Unknown     | 0.98  | 0.36       |        |
| <input checked="" type="checkbox"/> | C9  | RGS1 3      | Unknown     | 0.91  | 0.41       |        |
| <input checked="" type="checkbox"/> | C10 | RGS1 4      | Unknown     | 0.97  | 0.32       |        |
| <input checked="" type="checkbox"/> | C11 | RGS1 4      | Unknown     | 0.99  | 0.39       |        |
| <input checked="" type="checkbox"/> | C12 | RGS1 4      | Unknown     | 1.00  | 0.45       |        |
| <input checked="" type="checkbox"/> | F1  | RGS1 5      | Unknown     | 0.97  | 0.44       |        |
| <input checked="" type="checkbox"/> | F2  | RGS1 5      | Unknown     | 0.98  | 0.42       |        |
| <input checked="" type="checkbox"/> | F3  | RGS1 5      | Unknown     | 0.96  | 0.49       |        |
| <input checked="" type="checkbox"/> | F7  | RGS1 7      | Unknown     | 0.97  | 0.52       |        |

| Group 2                             |     |             |             |       |            |        |
|-------------------------------------|-----|-------------|-------------|-------|------------|--------|
| Inc                                 | Pos | Sample Name | Sample Type | Score | Resolution | Status |
| <input checked="" type="checkbox"/> | F8  | RGS1 7      | Unknown     | 0.89  | 0.23       |        |
| <input checked="" type="checkbox"/> | F9  | RGS1 7      | Unknown     | 0.95  | 0.29       |        |
| <input checked="" type="checkbox"/> | F10 | RGS1 8      | Unknown     | 0.98  | 0.43       |        |
| <input checked="" type="checkbox"/> | F11 | RGS1 8      | Unknown     | 0.97  | 0.44       |        |
| <input checked="" type="checkbox"/> | F12 | RGS1 8      | Unknown     | 0.93  | 0.53       |        |

| Group 3                             |     |             |             |       |            |        |
|-------------------------------------|-----|-------------|-------------|-------|------------|--------|
| Inc                                 | Pos | Sample Name | Sample Type | Score | Resolution | Status |
| <input checked="" type="checkbox"/> | A10 | GAPDH 4     | Unknown     | 0.97  | 0.28       |        |
| <input checked="" type="checkbox"/> | A11 | GAPDH 4     | Unknown     | 1.00  | 0.40       |        |
| <input checked="" type="checkbox"/> | A12 | GAPDH 4     | Unknown     | 0.98  | 0.50       |        |
| <input checked="" type="checkbox"/> | C4  | RGS1 2      | Unknown     | 0.84  | 0.22       |        |
| <input checked="" type="checkbox"/> | D1  | GAPDH 5     | Unknown     | 0.96  | 0.36       |        |
| <input checked="" type="checkbox"/> | D2  | GAPDH 5     | Unknown     | 0.94  | 0.35       |        |
| <input checked="" type="checkbox"/> | D3  | GAPDH 5     | Unknown     | 0.89  | 0.16       |        |
| <input checked="" type="checkbox"/> | D4  | GAPDH 6     | Unknown     | 0.94  | 0.25       |        |
| <input checked="" type="checkbox"/> | D8  | GAPDH 7     | Unknown     | 0.89  | 0.32       |        |
| <input checked="" type="checkbox"/> | D9  | GAPDH 7     | Unknown     | 0.75  | 0.16       |        |
| <input checked="" type="checkbox"/> | D10 | GAPDH 8     | Unknown     | 0.93  | 0.37       |        |
| <input checked="" type="checkbox"/> | D11 | GAPDH 8     | Unknown     | 0.85  | 0.11       |        |
| <input checked="" type="checkbox"/> | D12 | GAPDH 8     | Unknown     | 0.93  | 0.36       |        |

| Group 4                             |     |             |             |       |            |        |
|-------------------------------------|-----|-------------|-------------|-------|------------|--------|
| Inc                                 | Pos | Sample Name | Sample Type | Score | Resolution | Status |
| <input checked="" type="checkbox"/> | C3  | RGS1 1      | Unknown     | 0.92  | 0.13       |        |
| <input checked="" type="checkbox"/> | E1  | FCER1A 5    | Unknown     | 1.00  | 0.53       |        |
| <input checked="" type="checkbox"/> | E3  | FCER1A 5    | Unknown     | 0.90  | 0.29       |        |

| Group 5                             |     |             |             |       |            |        |
|-------------------------------------|-----|-------------|-------------|-------|------------|--------|
| Inc                                 | Pos | Sample Name | Sample Type | Score | Resolution | Status |
| <input checked="" type="checkbox"/> | C5  | RGS1 2      | Unknown     | 1.00  | 0.51       |        |

| Group 6                             |     |             |             |       |            |        |
|-------------------------------------|-----|-------------|-------------|-------|------------|--------|
| Inc                                 | Pos | Sample Name | Sample Type | Score | Resolution | Status |
| <input checked="" type="checkbox"/> | F4  | RGS1 6      | Unknown     | 1.00  | 0.40       |        |

| Group                               |     | Negative    |             |       |            |        |
|-------------------------------------|-----|-------------|-------------|-------|------------|--------|
| Inc                                 | Pos | Sample Name | Sample Type | Score | Resolution | Status |
| <input checked="" type="checkbox"/> | B11 | FCER1A 4    | Unknown     | 1.00  | 1.00       |        |
| <input checked="" type="checkbox"/> | G1  | blank       | Unknown     | 1.00  | 1.00       |        |
| <input checked="" type="checkbox"/> | G2  | blank       | Unknown     | 1.00  | 1.00       |        |
| <input checked="" type="checkbox"/> | G3  | blank       | Unknown     | 1.00  | 1.00       |        |
| <input checked="" type="checkbox"/> | G4  | blank       | Unknown     | 1.00  | 1.00       |        |
| <input checked="" type="checkbox"/> | G5  | blank       | Unknown     | 1.00  | 1.00       |        |
| <input checked="" type="checkbox"/> | G6  | blank       | Unknown     | 1.00  | 1.00       |        |
| <input checked="" type="checkbox"/> | G7  | blank       | Unknown     | 1.00  | 1.00       |        |
| <input checked="" type="checkbox"/> | G8  | blank       | Unknown     | 1.00  | 1.00       |        |
| <input checked="" type="checkbox"/> | G9  | blank       | Unknown     | 1.00  | 1.00       |        |
| <input checked="" type="checkbox"/> | G10 | blank       | Unknown     | 1.00  | 1.00       |        |
| <input checked="" type="checkbox"/> | G11 | blank       | Unknown     | 1.00  | 1.00       |        |
| <input checked="" type="checkbox"/> | G12 | blank       | Unknown     | 1.00  | 1.00       |        |
| <input checked="" type="checkbox"/> | H1  | blank       | Unknown     | 1.00  | 1.00       |        |
| <input checked="" type="checkbox"/> | H2  | blank       | Unknown     | 1.00  | 1.00       |        |
| <input checked="" type="checkbox"/> | H3  | blank       | Unknown     | 1.00  | 1.00       |        |
| <input checked="" type="checkbox"/> | H4  | blank       | Unknown     | 1.00  | 1.00       |        |
| <input checked="" type="checkbox"/> | H5  | blank       | Unknown     | 1.00  | 1.00       |        |
| <input checked="" type="checkbox"/> | H6  | blank       | Unknown     | 1.00  | 1.00       |        |
| <input checked="" type="checkbox"/> | H7  | blank       | Unknown     | 1.00  | 1.00       |        |
| <input checked="" type="checkbox"/> | H8  | blank       | Unknown     | 1.00  | 1.00       |        |
| <input checked="" type="checkbox"/> | H9  | blank       | Unknown     | 1.00  | 1.00       |        |
| <input checked="" type="checkbox"/> | H10 | blank       | Unknown     | 1.00  | 1.00       |        |
| <input checked="" type="checkbox"/> | H11 | blank       | Unknown     | 1.00  | 1.00       |        |
| <input checked="" type="checkbox"/> | H12 | blank       | Unknown     | 1.00  | 1.00       |        |

| Group                               |     | Unknown     |             |       |            |        |
|-------------------------------------|-----|-------------|-------------|-------|------------|--------|
| Inc                                 | Pos | Sample Name | Sample Type | Score | Resolution | Status |
| <input checked="" type="checkbox"/> | A2  | GAPDH 1     | Unknown     | 0.65  | 0.18       |        |
| <input checked="" type="checkbox"/> | C6  | RGS1 2      | Unknown     | 0.75  | 0.03       |        |
| <input checked="" type="checkbox"/> | D7  | GAPDH 7     | Unknown     | 0.62  |            |        |
| <input checked="" type="checkbox"/> | E2  | FCER1A 5    | Unknown     | 0.73  | 0.03       |        |
| <input checked="" type="checkbox"/> | F5  | RGS1 6      | Unknown     | 0.67  | 0.26       |        |

### Melting Curves

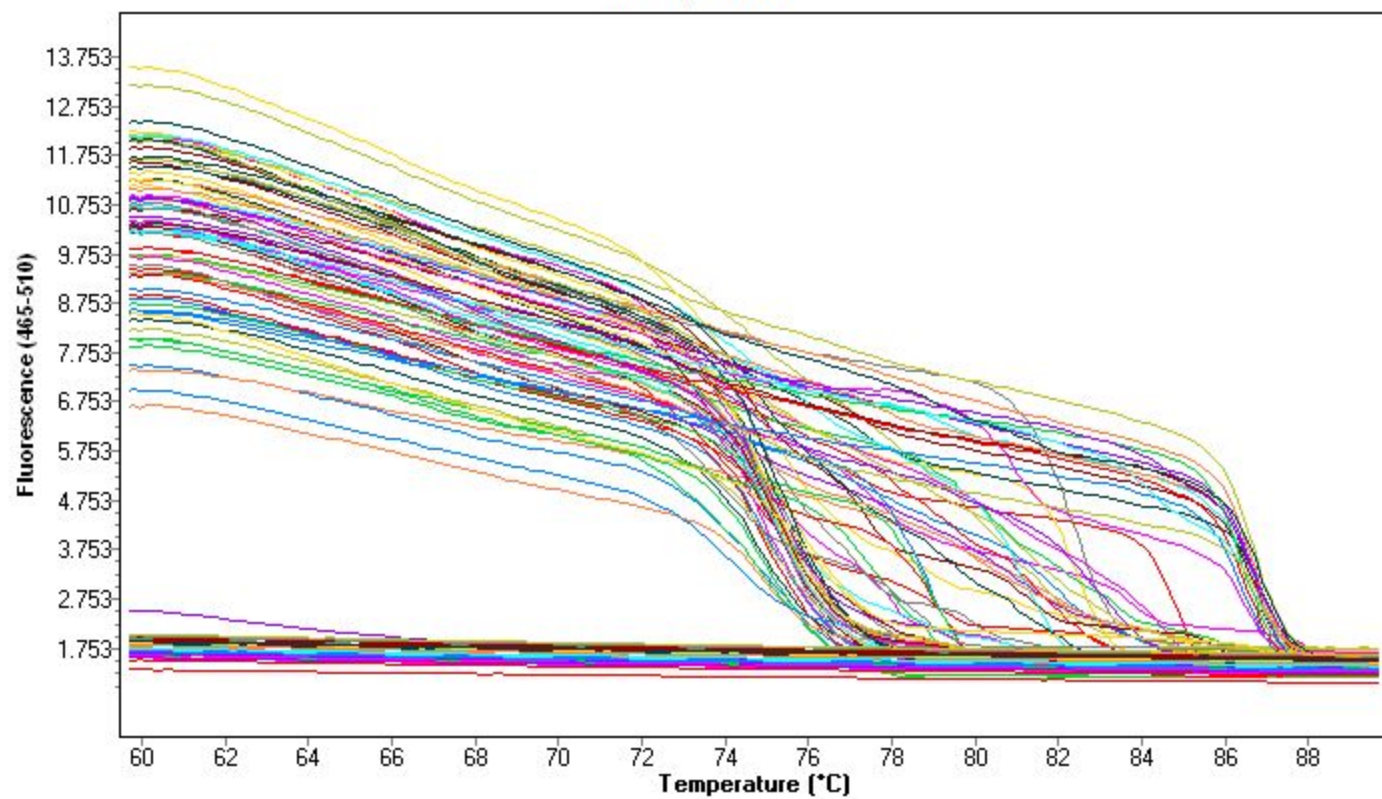

### Melting Peaks

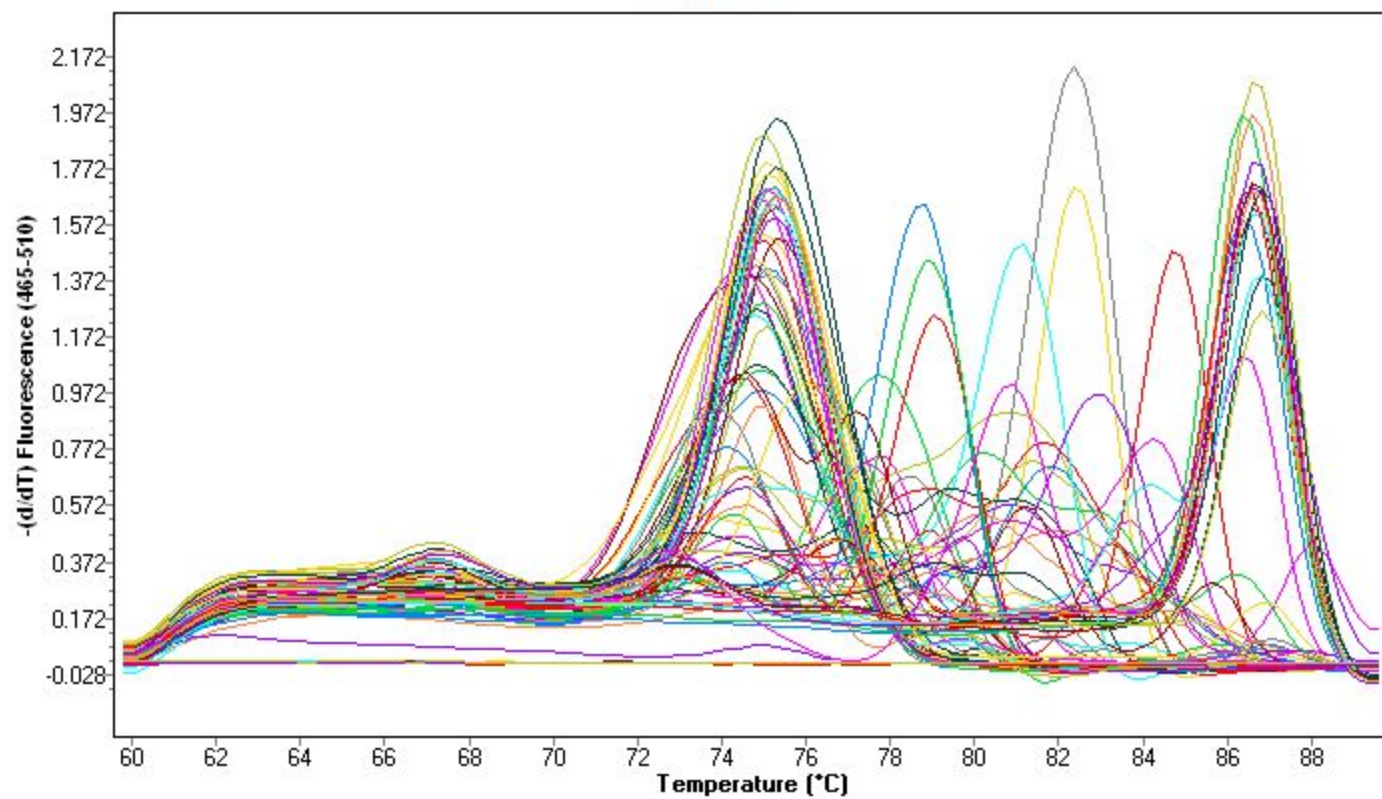

### Analysis Notes

## Tm Calling for All Samples (Tm Calling)

### Settings

|                |             |                    |          |
|----------------|-------------|--------------------|----------|
| Channel        | 465-510     | Color Compensation | Off      |
| Program        | Program     |                    |          |
| Show Shoulders | False       | Chemistry          | HybProbe |
|                |             | Max Peaks          | 2        |
| Subset Name    | All Samples |                    |          |

### Results

| Inc                                 | Pos | Sample Name | Peak 1 |      |       |        | Peak 2 |      |       |        | Status |
|-------------------------------------|-----|-------------|--------|------|-------|--------|--------|------|-------|--------|--------|
|                                     |     |             | Tm     | Area | Width | Height | Tm     | Area | Width | Height |        |
| <input checked="" type="checkbox"/> | A1  | GAPDH 1     | 74.90  | 4.35 | 4.24  | 1.03   |        |      |       |        |        |
| <input checked="" type="checkbox"/> | A2  | GAPDH 1     | 74.30  | 2.80 | 2.56  | 1.09   | 81.15  | 2.82 | 11.11 | 0.25   |        |
| <input checked="" type="checkbox"/> | A3  | GAPDH 1     | 74.82  | 4.98 | 4.59  | 1.09   |        |      |       |        |        |
| <input checked="" type="checkbox"/> | A4  | GAPDH 2     | 74.29  | 4.56 | 3.21  | 1.42   |        |      |       |        |        |
| <input checked="" type="checkbox"/> | A5  | GAPDH 2     | 75.13  | 4.08 | 2.97  | 1.37   |        |      |       |        |        |
| <input checked="" type="checkbox"/> | A6  | GAPDH 2     | 75.40  | 6.90 | 4.49  | 1.54   |        |      |       |        |        |
| <input checked="" type="checkbox"/> | A7  | GAPDH 3     | 74.84  | 6.59 | 4.82  | 1.37   |        |      |       |        |        |
| <input checked="" type="checkbox"/> | A8  | GAPDH 3     | 74.82  | 3.99 | 3.17  | 1.26   |        |      |       |        |        |
| <input checked="" type="checkbox"/> | A9  | GAPDH 3     | 74.81  | 4.42 | 3.53  | 1.25   |        |      |       |        |        |
| <input checked="" type="checkbox"/> | A10 | GAPDH 4     | 82.16  | 3.36 | 7.69  | 0.44   |        |      |       |        |        |
| <input checked="" type="checkbox"/> | A11 | GAPDH 4     | 74.42  | 0.60 | 2.32  | 0.26   | 81.10  | 2.94 | 6.50  | 0.45   |        |
| <input checked="" type="checkbox"/> | A12 | GAPDH 4     | 75.38  | 2.08 | 4.42  | 0.47   | 80.79  | 3.87 | 4.55  | 0.85   |        |
| <input checked="" type="checkbox"/> | B1  | FCER1A 1    | 75.41  | 4.56 | 3.18  | 1.44   |        |      |       |        |        |
| <input checked="" type="checkbox"/> | B2  | FCER1A 1    | 75.06  | 5.08 | 3.33  | 1.52   |        |      |       |        |        |
| <input checked="" type="checkbox"/> | B3  | FCER1A 1    | 75.08  | 4.55 | 3.44  | 1.32   |        |      |       |        |        |
| <input checked="" type="checkbox"/> | B4  | FCER1A 2    | 75.00  | 5.69 | 3.36  | 1.69   |        |      |       |        |        |
| <input checked="" type="checkbox"/> | B5  | FCER1A 2    | 75.38  | 5.43 | 3.17  | 1.71   |        |      |       |        |        |
| <input checked="" type="checkbox"/> | B6  | FCER1A 2    | 75.23  | 6.12 | 3.38  | 1.81   |        |      |       |        |        |
| <input checked="" type="checkbox"/> | B7  | FCER1A 3    | 75.44  | 4.95 | 3.22  | 1.54   |        |      |       |        |        |
| <input checked="" type="checkbox"/> | B8  | FCER1A 3    | 75.45  | 5.62 | 3.28  | 1.72   |        |      |       |        |        |
| <input checked="" type="checkbox"/> | B9  | FCER1A 3    | 75.62  | 5.93 | 3.32  | 1.79   |        |      |       |        |        |
| <input checked="" type="checkbox"/> | B10 | FCER1A 4    | 74.96  | 2.70 | 3.04  | 0.89   |        |      |       |        |        |
| <input checked="" type="checkbox"/> | B11 | FCER1A 4    |        |      |       |        |        |      |       |        |        |
| <input checked="" type="checkbox"/> | B12 | FCER1A 4    | 75.32  | 3.56 | 3.05  | 1.17   |        |      |       |        |        |
| <input checked="" type="checkbox"/> | C1  | RGS1 1      | 74.25  | 2.45 | 3.17  | 0.77   | 78.66  | 0.73 | 2.51  | 0.29   |        |
| <input checked="" type="checkbox"/> | C2  | RGS1 1      | 84.85  | 3.27 | 2.15  | 1.52   |        |      |       |        |        |
| <input checked="" type="checkbox"/> | C3  | RGS1 1      | 72.93  | 0.24 | 1.43  | 0.16   | 77.95  | 3.53 | 3.31  | 1.06   |        |
| <input checked="" type="checkbox"/> | C4  | RGS1 2      | 77.40  | 1.32 | 2.26  | 0.58   | 83.59  | 0.58 | 1.92  | 0.30   |        |
| <input checked="" type="checkbox"/> | C5  | RGS1 2      | 82.35  | 5.61 | 2.53  | 2.22   |        |      |       |        |        |

## Results

| Inc                                 | Pos | Sample Name | Peak 1 |      |       |        | Peak 2 |      |       |        | Status |
|-------------------------------------|-----|-------------|--------|------|-------|--------|--------|------|-------|--------|--------|
|                                     |     |             | Tm     | Area | Width | Height | Tm     | Area | Width | Height |        |
| <input checked="" type="checkbox"/> | C6  | RGS1 2      | 74.03  | 1.17 | 3.56  | 0.33   | 82.49  | 3.76 | 2.17  | 1.73   |        |
| <input checked="" type="checkbox"/> | C7  | RGS1 3      |        |      |       |        |        |      |       |        |        |
| <input checked="" type="checkbox"/> | C8  | RGS1 3      |        |      |       |        |        |      |       |        |        |
| <input checked="" type="checkbox"/> | C9  | RGS1 3      | 75.64  | 1.60 | 4.96  | 0.32   |        |      |       |        |        |
| <input checked="" type="checkbox"/> | C10 | RGS1 4      |        |      |       |        |        |      |       |        |        |
| <input checked="" type="checkbox"/> | C11 | RGS1 4      |        |      |       |        |        |      |       |        |        |
| <input checked="" type="checkbox"/> | C12 | RGS1 4      |        |      |       |        |        |      |       |        |        |
| <input checked="" type="checkbox"/> | D1  | GAPDH 5     | 77.02  | 1.25 | 5.33  | 0.24   | 82.24  | 2.39 | 3.91  | 0.61   |        |
| <input checked="" type="checkbox"/> | D2  | GAPDH 5     | 81.57  | 6.67 | 8.30  | 0.80   |        |      |       |        |        |
| <input checked="" type="checkbox"/> | D3  | GAPDH 5     | 73.21  | 0.25 | 1.97  | 0.13   | 81.34  | 3.22 | 5.68  | 0.57   |        |
| <input checked="" type="checkbox"/> | D4  | GAPDH 6     | 79.24  | 2.31 | 7.28  | 0.32   | 84.18  | 2.90 | 3.61  | 0.80   |        |
| <input checked="" type="checkbox"/> | D5  | GAPDH 6     | 75.55  | 5.66 | 4.12  | 1.37   |        |      |       |        |        |
| <input checked="" type="checkbox"/> | D6  | GAPDH 6     | 74.58  | 5.91 | 4.81  | 1.23   |        |      |       |        |        |
| <input checked="" type="checkbox"/> | D7  | GAPDH 7     | 75.57  | 4.75 | 5.36  | 0.89   | 81.34  | 0.93 | 1.84  | 0.51   |        |
| <input checked="" type="checkbox"/> | D8  | GAPDH 7     | 75.38  | 2.14 | 4.59  | 0.47   | 81.12  | 4.14 | 2.66  | 1.56   |        |
| <input checked="" type="checkbox"/> | D9  | GAPDH 7     | 75.16  | 3.80 | 3.46  | 1.10   | 80.61  | 4.14 | 5.49  | 0.75   |        |
| <input checked="" type="checkbox"/> | D10 | GAPDH 8     | 74.47  | 1.22 | 2.82  | 0.43   | 80.37  | 1.80 | 4.46  | 0.40   |        |
| <input checked="" type="checkbox"/> | D11 | GAPDH 8     | 74.57  | 1.09 | 2.26  | 0.48   | 82.96  | 3.60 | 3.77  | 0.95   |        |
| <input checked="" type="checkbox"/> | D12 | GAPDH 8     | 74.79  | 1.90 | 3.94  | 0.48   | 81.61  | 2.92 | 4.85  | 0.60   |        |
| <input checked="" type="checkbox"/> | E1  | FCER1A 5    | 73.92  | 0.31 | 1.54  | 0.20   | 78.78  | 4.18 | 2.46  | 1.70   |        |
| <input checked="" type="checkbox"/> | E2  | FCER1A 5    | 74.52  | 1.02 | 1.93  | 0.53   | 79.14  | 3.09 | 2.39  | 1.29   |        |
| <input checked="" type="checkbox"/> | E3  | FCER1A 5    | 74.25  | 0.71 | 1.76  | 0.40   | 78.96  | 3.57 | 2.37  | 1.51   |        |
| <input checked="" type="checkbox"/> | E4  | FCER1A 6    | 75.26  | 4.99 | 2.94  | 1.70   |        |      |       |        |        |
| <input checked="" type="checkbox"/> | E5  | FCER1A 6    | 75.33  | 5.62 | 3.23  | 1.74   |        |      |       |        |        |
| <input checked="" type="checkbox"/> | E6  | FCER1A 6    | 75.46  | 5.93 | 3.36  | 1.77   |        |      |       |        |        |
| <input checked="" type="checkbox"/> | E7  | FCER1A 7    | 75.33  | 5.29 | 3.26  | 1.62   |        |      |       |        |        |
| <input checked="" type="checkbox"/> | E8  | FCER1A 7    | 75.28  | 5.56 | 3.35  | 1.66   |        |      |       |        |        |
| <input checked="" type="checkbox"/> | E9  | FCER1A 7    | 75.46  | 6.83 | 3.45  | 1.98   |        |      |       |        |        |
| <input checked="" type="checkbox"/> | E10 | FCER1A 8    | 75.41  | 5.50 | 3.31  | 1.66   |        |      |       |        |        |
| <input checked="" type="checkbox"/> | E11 | FCER1A 8    | 75.33  | 5.24 | 3.45  | 1.52   |        |      |       |        |        |
| <input checked="" type="checkbox"/> | E12 | FCER1A 8    | 74.99  | 5.52 | 3.05  | 1.81   |        |      |       |        |        |
| <input checked="" type="checkbox"/> | F1  | RGS1 5      | 86.50  | 4.16 | 2.50  | 1.66   |        |      |       |        |        |
| <input checked="" type="checkbox"/> | F2  | RGS1 5      | 86.60  | 4.44 | 2.51  | 1.77   |        |      |       |        |        |
| <input checked="" type="checkbox"/> | F3  | RGS1 5      | 86.47  | 4.91 | 2.47  | 1.99   |        |      |       |        |        |
| <input checked="" type="checkbox"/> | F4  | RGS1 6      | 80.97  | 1.21 | 1.42  | 0.86   | 86.50  | 2.78 | 2.43  | 1.14   |        |
| <input checked="" type="checkbox"/> | F5  | RGS1 6      | 74.02  | 2.38 | 2.62  | 0.91   | 78.53  | 2.05 | 2.70  | 0.76   |        |

## Results

| Inc                                 | Pos | Sample Name | Peak 1 |      |       |        | Peak 2 |      |       |        | Status |
|-------------------------------------|-----|-------------|--------|------|-------|--------|--------|------|-------|--------|--------|
|                                     |     |             | Tm     | Area | Width | Height | Tm     | Area | Width | Height |        |
| <input checked="" type="checkbox"/> | F6  | RGS1 6      | 76.10  | 2.92 | 2.98  | 0.98   |        |      |       |        |        |
| <input checked="" type="checkbox"/> | F7  | RGS1 7      |        |      |       |        |        |      |       |        |        |
| <input checked="" type="checkbox"/> | F8  | RGS1 7      |        |      |       |        |        |      |       |        |        |
| <input checked="" type="checkbox"/> | F9  | RGS1 7      |        |      |       |        |        |      |       |        |        |
| <input checked="" type="checkbox"/> | F10 | RGS1 8      |        |      |       |        |        |      |       |        |        |
| <input checked="" type="checkbox"/> | F11 | RGS1 8      | 72.50  | 0.37 | 1.77  | 0.21   |        |      |       |        |        |
| <input checked="" type="checkbox"/> | F12 | RGS1 8      | 73.82  | 0.80 | 3.34  | 0.24   |        |      |       |        |        |
| <input checked="" type="checkbox"/> | G1  | blank       |        |      |       |        |        |      |       |        |        |
| <input checked="" type="checkbox"/> | G2  | blank       |        |      |       |        |        |      |       |        |        |
| <input checked="" type="checkbox"/> | G3  | blank       |        |      |       |        |        |      |       |        |        |
| <input checked="" type="checkbox"/> | G4  | blank       |        |      |       |        |        |      |       |        |        |
| <input checked="" type="checkbox"/> | G5  | blank       |        |      |       |        |        |      |       |        |        |
| <input checked="" type="checkbox"/> | G6  | blank       |        |      |       |        |        |      |       |        |        |
| <input checked="" type="checkbox"/> | G7  | blank       |        |      |       |        |        |      |       |        |        |
| <input checked="" type="checkbox"/> | G8  | blank       |        |      |       |        |        |      |       |        |        |
| <input checked="" type="checkbox"/> | G9  | blank       |        |      |       |        |        |      |       |        |        |
| <input checked="" type="checkbox"/> | G10 | blank       |        |      |       |        |        |      |       |        |        |
| <input checked="" type="checkbox"/> | G11 | blank       |        |      |       |        |        |      |       |        |        |
| <input checked="" type="checkbox"/> | G12 | blank       |        |      |       |        |        |      |       |        |        |
| <input checked="" type="checkbox"/> | H1  | blank       |        |      |       |        |        |      |       |        |        |
| <input checked="" type="checkbox"/> | H2  | blank       |        |      |       |        |        |      |       |        |        |
| <input checked="" type="checkbox"/> | H3  | blank       |        |      |       |        |        |      |       |        |        |
| <input checked="" type="checkbox"/> | H4  | blank       |        |      |       |        |        |      |       |        |        |
| <input checked="" type="checkbox"/> | H5  | blank       |        |      |       |        |        |      |       |        |        |
| <input checked="" type="checkbox"/> | H6  | blank       |        |      |       |        |        |      |       |        |        |
| <input checked="" type="checkbox"/> | H7  | blank       |        |      |       |        |        |      |       |        |        |
| <input checked="" type="checkbox"/> | H8  | blank       |        |      |       |        |        |      |       |        |        |
| <input checked="" type="checkbox"/> | H9  | blank       |        |      |       |        |        |      |       |        |        |
| <input checked="" type="checkbox"/> | H10 | blank       |        |      |       |        |        |      |       |        |        |
| <input checked="" type="checkbox"/> | H11 | blank       |        |      |       |        |        |      |       |        |        |
| <input checked="" type="checkbox"/> | H12 | blank       |        |      |       |        |        |      |       |        |        |



### Melting Curves

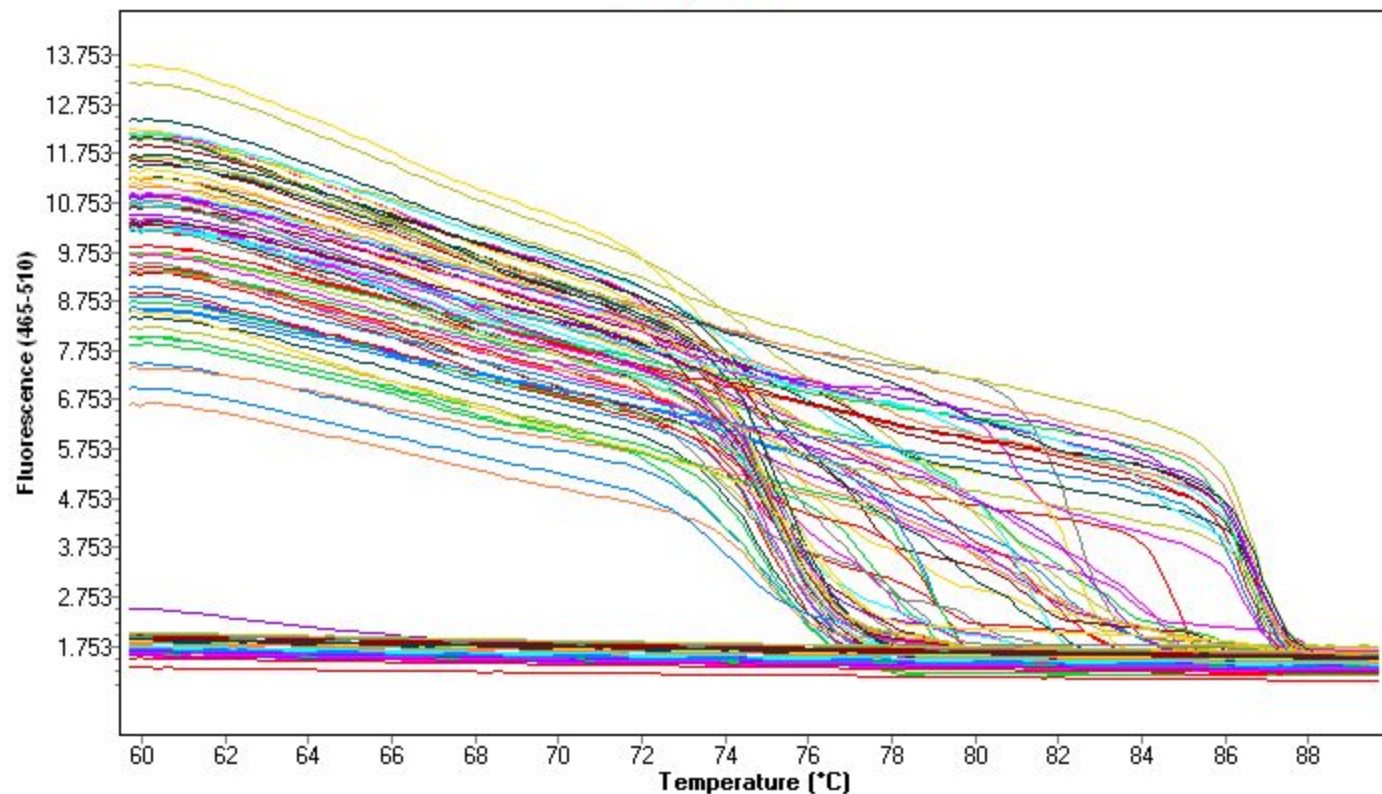

### Melting Peaks

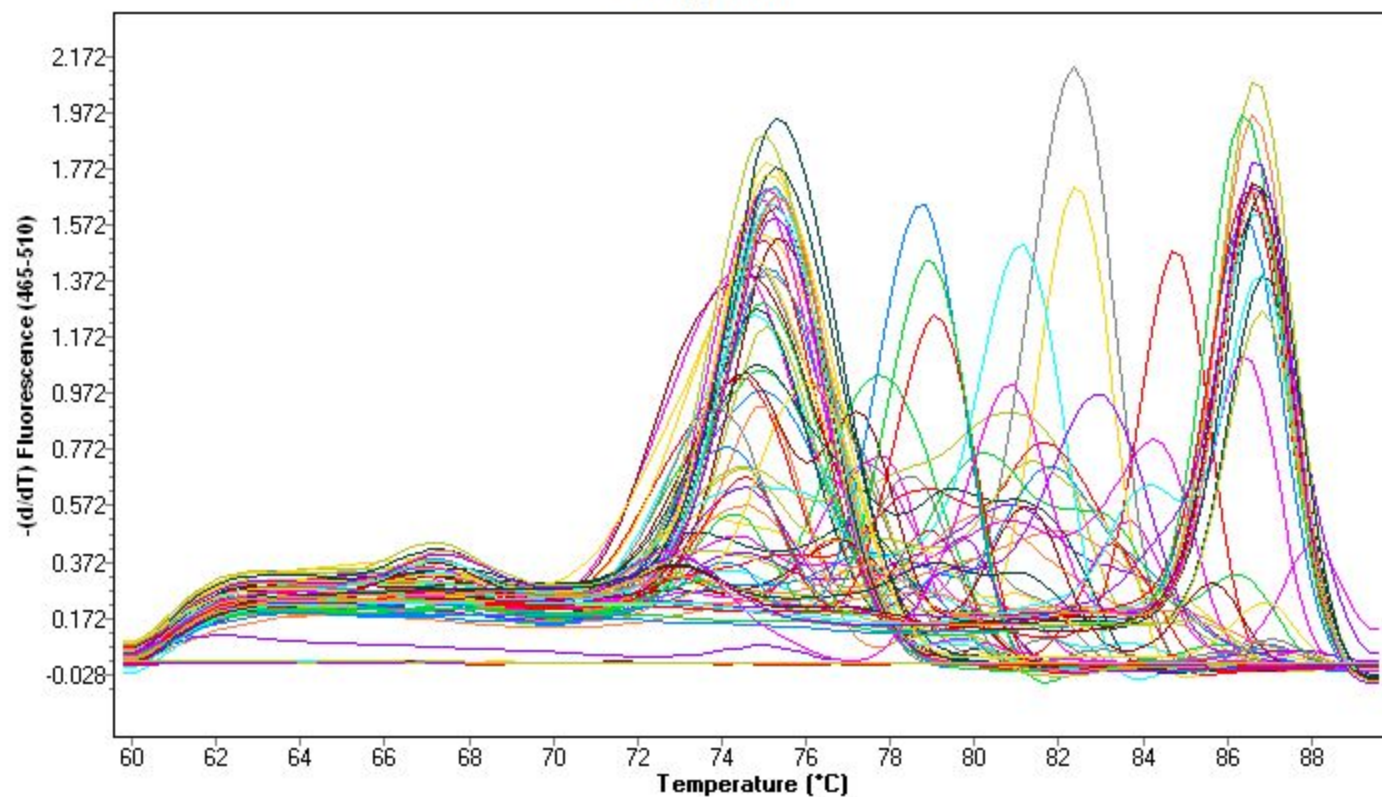

### Analysis Notes



## Melt Curve Genotyping for All Samples (1) (Melt Curve Genotyping)

|                |            |                    |       |
|----------------|------------|--------------------|-------|
| Channel        | 465-510    | Color Compensation | Off   |
| Program Name   | Program    |                    |       |
| Std's Settings | Auto-Group |                    |       |
| Sensitivity    | Normal     | Temp Range         | 62-86 |
| Score          | 0.7        | Res                | 0.1   |

|             |             |
|-------------|-------------|
| Subset Name | All Samples |
|-------------|-------------|

### Results

| Inc                                 | Pos. | Sample Name | Sample Type | Group    | Score | Resolution | Status |
|-------------------------------------|------|-------------|-------------|----------|-------|------------|--------|
| <input checked="" type="checkbox"/> | A1   | GAPDH 1     | Unknown     | 1        | 0.95  | 0.79       |        |
| <input checked="" type="checkbox"/> | A2   | GAPDH 1     | Unknown     | Unknown  | 0.65  | 0.18       |        |
| <input checked="" type="checkbox"/> | A3   | GAPDH 1     | Unknown     | 1        | 0.95  | 0.80       |        |
| <input checked="" type="checkbox"/> | A4   | GAPDH 2     | Unknown     | 1        | 0.86  | 0.53       |        |
| <input checked="" type="checkbox"/> | A5   | GAPDH 2     | Unknown     | 1        | 0.89  | 0.40       |        |
| <input checked="" type="checkbox"/> | A6   | GAPDH 2     | Unknown     | 1        | 0.96  | 0.65       |        |
| <input checked="" type="checkbox"/> | A7   | GAPDH 3     | Unknown     | 1        | 0.93  | 0.72       |        |
| <input checked="" type="checkbox"/> | A8   | GAPDH 3     | Unknown     | 1        | 0.90  | 0.59       |        |
| <input checked="" type="checkbox"/> | A9   | GAPDH 3     | Unknown     | 1        | 0.97  | 0.83       |        |
| <input checked="" type="checkbox"/> | A10  | GAPDH 4     | Unknown     | 3        | 0.97  | 0.28       |        |
| <input checked="" type="checkbox"/> | A11  | GAPDH 4     | Unknown     | 3        | 1.00  | 0.40       |        |
| <input checked="" type="checkbox"/> | A12  | GAPDH 4     | Unknown     | 3        | 0.98  | 0.50       |        |
| <input checked="" type="checkbox"/> | B1   | FCER1A 1    | Unknown     | 1        | 0.96  | 0.71       |        |
| <input checked="" type="checkbox"/> | B2   | FCER1A 1    | Unknown     | 1        | 0.97  | 0.78       |        |
| <input checked="" type="checkbox"/> | B3   | FCER1A 1    | Unknown     | 1        | 0.95  | 0.77       |        |
| <input checked="" type="checkbox"/> | B4   | FCER1A 2    | Unknown     | 1        | 0.91  | 0.73       |        |
| <input checked="" type="checkbox"/> | B5   | FCER1A 2    | Unknown     | 1        | 0.94  | 0.71       |        |
| <input checked="" type="checkbox"/> | B6   | FCER1A 2    | Unknown     | 1        | 0.96  | 0.73       |        |
| <input checked="" type="checkbox"/> | B7   | FCER1A 3    | Unknown     | 1        | 0.97  | 0.66       |        |
| <input checked="" type="checkbox"/> | B8   | FCER1A 3    | Unknown     | 1        | 0.97  | 0.69       |        |
| <input checked="" type="checkbox"/> | B9   | FCER1A 3    | Unknown     | 1        | 0.97  | 0.63       |        |
| <input checked="" type="checkbox"/> | B10  | FCER1A 4    | Unknown     | 1        | 0.95  | 0.72       |        |
| <input checked="" type="checkbox"/> | B11  | FCER1A 4    | Unknown     | Negative | 1.00  | 1.00       |        |
| <input checked="" type="checkbox"/> | B12  | FCER1A 4    | Unknown     | 1        | 1.00  | 0.71       |        |
| <input checked="" type="checkbox"/> | C1   | RGS1 1      | Unknown     | 1        | 0.89  | 0.60       |        |
| <input checked="" type="checkbox"/> | C2   | RGS1 1      | Unknown     | 2        | 0.78  | 0.19       |        |
| <input checked="" type="checkbox"/> | C3   | RGS1 1      | Unknown     | 4        | 0.92  | 0.13       |        |
| <input checked="" type="checkbox"/> | C4   | RGS1 2      | Unknown     | 3        | 0.84  | 0.22       |        |
| <input checked="" type="checkbox"/> | C5   | RGS1 2      | Unknown     | 5        | 1.00  | 0.51       |        |
| <input checked="" type="checkbox"/> | C6   | RGS1 2      | Unknown     | Unknown  | 0.75  | 0.03       |        |
| <input checked="" type="checkbox"/> | C7   | RGS1 3      | Unknown     | 2        | 0.95  | 0.37       |        |

## Results

| Inc                                 | Pos. | Sample Name | Sample Type | Group   | Score | Resolution | Status |
|-------------------------------------|------|-------------|-------------|---------|-------|------------|--------|
| <input checked="" type="checkbox"/> | C8   | RGS1 3      | Unknown     | 2       | 0.98  | 0.36       |        |
| <input checked="" type="checkbox"/> | C9   | RGS1 3      | Unknown     | 2       | 0.91  | 0.41       |        |
| <input checked="" type="checkbox"/> | C10  | RGS1 4      | Unknown     | 2       | 0.97  | 0.32       |        |
| <input checked="" type="checkbox"/> | C11  | RGS1 4      | Unknown     | 2       | 0.99  | 0.39       |        |
| <input checked="" type="checkbox"/> | C12  | RGS1 4      | Unknown     | 2       | 1.00  | 0.45       |        |
| <input checked="" type="checkbox"/> | D1   | GAPDH 5     | Unknown     | 3       | 0.96  | 0.36       |        |
| <input checked="" type="checkbox"/> | D2   | GAPDH 5     | Unknown     | 3       | 0.94  | 0.35       |        |
| <input checked="" type="checkbox"/> | D3   | GAPDH 5     | Unknown     | 3       | 0.89  | 0.16       |        |
| <input checked="" type="checkbox"/> | D4   | GAPDH 6     | Unknown     | 3       | 0.94  | 0.25       |        |
| <input checked="" type="checkbox"/> | D5   | GAPDH 6     | Unknown     | 1       | 0.97  | 0.56       |        |
| <input checked="" type="checkbox"/> | D6   | GAPDH 6     | Unknown     | 1       | 0.80  | 0.40       |        |
| <input checked="" type="checkbox"/> | D7   | GAPDH 7     | Unknown     | Unknown | 0.62  |            |        |
| <input checked="" type="checkbox"/> | D8   | GAPDH 7     | Unknown     | 3       | 0.89  | 0.32       |        |
| <input checked="" type="checkbox"/> | D9   | GAPDH 7     | Unknown     | 3       | 0.75  | 0.16       |        |
| <input checked="" type="checkbox"/> | D10  | GAPDH 8     | Unknown     | 3       | 0.93  | 0.37       |        |
| <input checked="" type="checkbox"/> | D11  | GAPDH 8     | Unknown     | 3       | 0.85  | 0.11       |        |
| <input checked="" type="checkbox"/> | D12  | GAPDH 8     | Unknown     | 3       | 0.93  | 0.36       |        |
| <input checked="" type="checkbox"/> | E1   | FCER1A 5    | Unknown     | 4       | 1.00  | 0.53       |        |
| <input checked="" type="checkbox"/> | E2   | FCER1A 5    | Unknown     | Unknown | 0.73  | 0.03       |        |
| <input checked="" type="checkbox"/> | E3   | FCER1A 5    | Unknown     | 4       | 0.90  | 0.29       |        |
| <input checked="" type="checkbox"/> | E4   | FCER1A 6    | Unknown     | 1       | 0.98  | 0.74       |        |
| <input checked="" type="checkbox"/> | E5   | FCER1A 6    | Unknown     | 1       | 0.97  | 0.71       |        |
| <input checked="" type="checkbox"/> | E6   | FCER1A 6    | Unknown     | 1       | 0.97  | 0.67       |        |
| <input checked="" type="checkbox"/> | E7   | FCER1A 7    | Unknown     | 1       | 0.98  | 0.67       |        |
| <input checked="" type="checkbox"/> | E8   | FCER1A 7    | Unknown     | 1       | 0.98  | 0.72       |        |
| <input checked="" type="checkbox"/> | E9   | FCER1A 7    | Unknown     | 1       | 0.96  | 0.64       |        |
| <input checked="" type="checkbox"/> | E10  | FCER1A 8    | Unknown     | 1       | 0.98  | 0.66       |        |
| <input checked="" type="checkbox"/> | E11  | FCER1A 8    | Unknown     | 1       | 0.96  | 0.59       |        |
| <input checked="" type="checkbox"/> | E12  | FCER1A 8    | Unknown     | 1       | 0.98  | 0.79       |        |
| <input checked="" type="checkbox"/> | F1   | RGS1 5      | Unknown     | 2       | 0.97  | 0.44       |        |
| <input checked="" type="checkbox"/> | F2   | RGS1 5      | Unknown     | 2       | 0.98  | 0.42       |        |
| <input checked="" type="checkbox"/> | F3   | RGS1 5      | Unknown     | 2       | 0.96  | 0.49       |        |
| <input checked="" type="checkbox"/> | F4   | RGS1 6      | Unknown     | 6       | 1.00  | 0.40       |        |
| <input checked="" type="checkbox"/> | F5   | RGS1 6      | Unknown     | Unknown | 0.67  | 0.26       |        |
| <input checked="" type="checkbox"/> | F6   | RGS1 6      | Unknown     | 1       | 0.87  | 0.42       |        |
| <input checked="" type="checkbox"/> | F7   | RGS1 7      | Unknown     | 2       | 0.97  | 0.52       |        |
| <input checked="" type="checkbox"/> | F8   | RGS1 7      | Unknown     | 2       | 0.89  | 0.23       |        |
| <input checked="" type="checkbox"/> | F9   | RGS1 7      | Unknown     | 2       | 0.95  | 0.29       |        |

## Results

| Inc                                 | Pos. | Sample Name | Sample Type | Group    | Score | Resolution | Status |
|-------------------------------------|------|-------------|-------------|----------|-------|------------|--------|
| <input checked="" type="checkbox"/> | F10  | RGS1 8      | Unknown     | 2        | 0.98  | 0.43       |        |
| <input checked="" type="checkbox"/> | F11  | RGS1 8      | Unknown     | 2        | 0.97  | 0.44       |        |
| <input checked="" type="checkbox"/> | F12  | RGS1 8      | Unknown     | 2        | 0.93  | 0.53       |        |
| <input checked="" type="checkbox"/> | G1   | blank       | Unknown     | Negative | 1.00  | 1.00       |        |
| <input checked="" type="checkbox"/> | G2   | blank       | Unknown     | Negative | 1.00  | 1.00       |        |
| <input checked="" type="checkbox"/> | G3   | blank       | Unknown     | Negative | 1.00  | 1.00       |        |
| <input checked="" type="checkbox"/> | G4   | blank       | Unknown     | Negative | 1.00  | 1.00       |        |
| <input checked="" type="checkbox"/> | G5   | blank       | Unknown     | Negative | 1.00  | 1.00       |        |
| <input checked="" type="checkbox"/> | G6   | blank       | Unknown     | Negative | 1.00  | 1.00       |        |
| <input checked="" type="checkbox"/> | G7   | blank       | Unknown     | Negative | 1.00  | 1.00       |        |
| <input checked="" type="checkbox"/> | G8   | blank       | Unknown     | Negative | 1.00  | 1.00       |        |
| <input checked="" type="checkbox"/> | G9   | blank       | Unknown     | Negative | 1.00  | 1.00       |        |
| <input checked="" type="checkbox"/> | G10  | blank       | Unknown     | Negative | 1.00  | 1.00       |        |
| <input checked="" type="checkbox"/> | G11  | blank       | Unknown     | Negative | 1.00  | 1.00       |        |
| <input checked="" type="checkbox"/> | G12  | blank       | Unknown     | Negative | 1.00  | 1.00       |        |
| <input checked="" type="checkbox"/> | H1   | blank       | Unknown     | Negative | 1.00  | 1.00       |        |
| <input checked="" type="checkbox"/> | H2   | blank       | Unknown     | Negative | 1.00  | 1.00       |        |
| <input checked="" type="checkbox"/> | H3   | blank       | Unknown     | Negative | 1.00  | 1.00       |        |
| <input checked="" type="checkbox"/> | H4   | blank       | Unknown     | Negative | 1.00  | 1.00       |        |
| <input checked="" type="checkbox"/> | H5   | blank       | Unknown     | Negative | 1.00  | 1.00       |        |
| <input checked="" type="checkbox"/> | H6   | blank       | Unknown     | Negative | 1.00  | 1.00       |        |
| <input checked="" type="checkbox"/> | H7   | blank       | Unknown     | Negative | 1.00  | 1.00       |        |
| <input checked="" type="checkbox"/> | H8   | blank       | Unknown     | Negative | 1.00  | 1.00       |        |
| <input checked="" type="checkbox"/> | H9   | blank       | Unknown     | Negative | 1.00  | 1.00       |        |
| <input checked="" type="checkbox"/> | H10  | blank       | Unknown     | Negative | 1.00  | 1.00       |        |
| <input checked="" type="checkbox"/> | H11  | blank       | Unknown     | Negative | 1.00  | 1.00       |        |
| <input checked="" type="checkbox"/> | H12  | blank       | Unknown     | Negative | 1.00  | 1.00       |        |

## Group 1

| Inc                                 | Pos | Sample Name | Sample Type | Score | Resolution | Status |
|-------------------------------------|-----|-------------|-------------|-------|------------|--------|
| <input checked="" type="checkbox"/> | A1  | GAPDH 1     | Unknown     | 0.95  | 0.79       |        |
| <input checked="" type="checkbox"/> | A3  | GAPDH 1     | Unknown     | 0.95  | 0.80       |        |
| <input checked="" type="checkbox"/> | A4  | GAPDH 2     | Unknown     | 0.86  | 0.53       |        |
| <input checked="" type="checkbox"/> | A5  | GAPDH 2     | Unknown     | 0.89  | 0.40       |        |
| <input checked="" type="checkbox"/> | A6  | GAPDH 2     | Unknown     | 0.96  | 0.65       |        |
| <input checked="" type="checkbox"/> | A7  | GAPDH 3     | Unknown     | 0.93  | 0.72       |        |
| <input checked="" type="checkbox"/> | A8  | GAPDH 3     | Unknown     | 0.90  | 0.59       |        |
| <input checked="" type="checkbox"/> | A9  | GAPDH 3     | Unknown     | 0.97  | 0.83       |        |

**Group 1**

| Inc                                 | Pos | Sample Name | Sample Type | Score | Resolution | Status |
|-------------------------------------|-----|-------------|-------------|-------|------------|--------|
| <input checked="" type="checkbox"/> | B1  | FCER1A 1    | Unknown     | 0.96  | 0.71       |        |
| <input checked="" type="checkbox"/> | B2  | FCER1A 1    | Unknown     | 0.97  | 0.78       |        |
| <input checked="" type="checkbox"/> | B3  | FCER1A 1    | Unknown     | 0.95  | 0.77       |        |
| <input checked="" type="checkbox"/> | B4  | FCER1A 2    | Unknown     | 0.91  | 0.73       |        |
| <input checked="" type="checkbox"/> | B5  | FCER1A 2    | Unknown     | 0.94  | 0.71       |        |
| <input checked="" type="checkbox"/> | B6  | FCER1A 2    | Unknown     | 0.96  | 0.73       |        |
| <input checked="" type="checkbox"/> | B7  | FCER1A 3    | Unknown     | 0.97  | 0.66       |        |
| <input checked="" type="checkbox"/> | B8  | FCER1A 3    | Unknown     | 0.97  | 0.69       |        |
| <input checked="" type="checkbox"/> | B9  | FCER1A 3    | Unknown     | 0.97  | 0.63       |        |
| <input checked="" type="checkbox"/> | B10 | FCER1A 4    | Unknown     | 0.95  | 0.72       |        |
| <input checked="" type="checkbox"/> | B12 | FCER1A 4    | Unknown     | 1.00  | 0.71       |        |
| <input checked="" type="checkbox"/> | C1  | RGS1 1      | Unknown     | 0.89  | 0.60       |        |
| <input checked="" type="checkbox"/> | D5  | GAPDH 6     | Unknown     | 0.97  | 0.56       |        |
| <input checked="" type="checkbox"/> | D6  | GAPDH 6     | Unknown     | 0.80  | 0.40       |        |
| <input checked="" type="checkbox"/> | E4  | FCER1A 6    | Unknown     | 0.98  | 0.74       |        |
| <input checked="" type="checkbox"/> | E5  | FCER1A 6    | Unknown     | 0.97  | 0.71       |        |
| <input checked="" type="checkbox"/> | E6  | FCER1A 6    | Unknown     | 0.97  | 0.67       |        |
| <input checked="" type="checkbox"/> | E7  | FCER1A 7    | Unknown     | 0.98  | 0.67       |        |
| <input checked="" type="checkbox"/> | E8  | FCER1A 7    | Unknown     | 0.98  | 0.72       |        |
| <input checked="" type="checkbox"/> | E9  | FCER1A 7    | Unknown     | 0.96  | 0.64       |        |
| <input checked="" type="checkbox"/> | E10 | FCER1A 8    | Unknown     | 0.98  | 0.66       |        |
| <input checked="" type="checkbox"/> | E11 | FCER1A 8    | Unknown     | 0.96  | 0.59       |        |
| <input checked="" type="checkbox"/> | E12 | FCER1A 8    | Unknown     | 0.98  | 0.79       |        |
| <input checked="" type="checkbox"/> | F6  | RGS1 6      | Unknown     | 0.87  | 0.42       |        |

**Group 2**

| Inc                                 | Pos | Sample Name | Sample Type | Score | Resolution | Status |
|-------------------------------------|-----|-------------|-------------|-------|------------|--------|
| <input checked="" type="checkbox"/> | C2  | RGS1 1      | Unknown     | 0.78  | 0.19       |        |
| <input checked="" type="checkbox"/> | C7  | RGS1 3      | Unknown     | 0.95  | 0.37       |        |
| <input checked="" type="checkbox"/> | C8  | RGS1 3      | Unknown     | 0.98  | 0.36       |        |
| <input checked="" type="checkbox"/> | C9  | RGS1 3      | Unknown     | 0.91  | 0.41       |        |
| <input checked="" type="checkbox"/> | C10 | RGS1 4      | Unknown     | 0.97  | 0.32       |        |
| <input checked="" type="checkbox"/> | C11 | RGS1 4      | Unknown     | 0.99  | 0.39       |        |
| <input checked="" type="checkbox"/> | C12 | RGS1 4      | Unknown     | 1.00  | 0.45       |        |
| <input checked="" type="checkbox"/> | F1  | RGS1 5      | Unknown     | 0.97  | 0.44       |        |
| <input checked="" type="checkbox"/> | F2  | RGS1 5      | Unknown     | 0.98  | 0.42       |        |
| <input checked="" type="checkbox"/> | F3  | RGS1 5      | Unknown     | 0.96  | 0.49       |        |
| <input checked="" type="checkbox"/> | F7  | RGS1 7      | Unknown     | 0.97  | 0.52       |        |

| Group 2                             |     |             |             |       |            |        |
|-------------------------------------|-----|-------------|-------------|-------|------------|--------|
| Inc                                 | Pos | Sample Name | Sample Type | Score | Resolution | Status |
| <input checked="" type="checkbox"/> | F8  | RGS1 7      | Unknown     | 0.89  | 0.23       |        |
| <input checked="" type="checkbox"/> | F9  | RGS1 7      | Unknown     | 0.95  | 0.29       |        |
| <input checked="" type="checkbox"/> | F10 | RGS1 8      | Unknown     | 0.98  | 0.43       |        |
| <input checked="" type="checkbox"/> | F11 | RGS1 8      | Unknown     | 0.97  | 0.44       |        |
| <input checked="" type="checkbox"/> | F12 | RGS1 8      | Unknown     | 0.93  | 0.53       |        |

| Group 3                             |     |             |             |       |            |        |
|-------------------------------------|-----|-------------|-------------|-------|------------|--------|
| Inc                                 | Pos | Sample Name | Sample Type | Score | Resolution | Status |
| <input checked="" type="checkbox"/> | A10 | GAPDH 4     | Unknown     | 0.97  | 0.28       |        |
| <input checked="" type="checkbox"/> | A11 | GAPDH 4     | Unknown     | 1.00  | 0.40       |        |
| <input checked="" type="checkbox"/> | A12 | GAPDH 4     | Unknown     | 0.98  | 0.50       |        |
| <input checked="" type="checkbox"/> | C4  | RGS1 2      | Unknown     | 0.84  | 0.22       |        |
| <input checked="" type="checkbox"/> | D1  | GAPDH 5     | Unknown     | 0.96  | 0.36       |        |
| <input checked="" type="checkbox"/> | D2  | GAPDH 5     | Unknown     | 0.94  | 0.35       |        |
| <input checked="" type="checkbox"/> | D3  | GAPDH 5     | Unknown     | 0.89  | 0.16       |        |
| <input checked="" type="checkbox"/> | D4  | GAPDH 6     | Unknown     | 0.94  | 0.25       |        |
| <input checked="" type="checkbox"/> | D8  | GAPDH 7     | Unknown     | 0.89  | 0.32       |        |
| <input checked="" type="checkbox"/> | D9  | GAPDH 7     | Unknown     | 0.75  | 0.16       |        |
| <input checked="" type="checkbox"/> | D10 | GAPDH 8     | Unknown     | 0.93  | 0.37       |        |
| <input checked="" type="checkbox"/> | D11 | GAPDH 8     | Unknown     | 0.85  | 0.11       |        |
| <input checked="" type="checkbox"/> | D12 | GAPDH 8     | Unknown     | 0.93  | 0.36       |        |

| Group 4                             |     |             |             |       |            |        |
|-------------------------------------|-----|-------------|-------------|-------|------------|--------|
| Inc                                 | Pos | Sample Name | Sample Type | Score | Resolution | Status |
| <input checked="" type="checkbox"/> | C3  | RGS1 1      | Unknown     | 0.92  | 0.13       |        |
| <input checked="" type="checkbox"/> | E1  | FCER1A 5    | Unknown     | 1.00  | 0.53       |        |
| <input checked="" type="checkbox"/> | E3  | FCER1A 5    | Unknown     | 0.90  | 0.29       |        |

| Group 5                             |     |             |             |       |            |        |
|-------------------------------------|-----|-------------|-------------|-------|------------|--------|
| Inc                                 | Pos | Sample Name | Sample Type | Score | Resolution | Status |
| <input checked="" type="checkbox"/> | C5  | RGS1 2      | Unknown     | 1.00  | 0.51       |        |

| Group 6                             |     |             |             |       |            |        |
|-------------------------------------|-----|-------------|-------------|-------|------------|--------|
| Inc                                 | Pos | Sample Name | Sample Type | Score | Resolution | Status |
| <input checked="" type="checkbox"/> | F4  | RGS1 6      | Unknown     | 1.00  | 0.40       |        |

| Group                               |     | Negative    |             |       |            |        |
|-------------------------------------|-----|-------------|-------------|-------|------------|--------|
| Inc                                 | Pos | Sample Name | Sample Type | Score | Resolution | Status |
| <input checked="" type="checkbox"/> | B11 | FCER1A 4    | Unknown     | 1.00  | 1.00       |        |
| <input checked="" type="checkbox"/> | G1  | blank       | Unknown     | 1.00  | 1.00       |        |
| <input checked="" type="checkbox"/> | G2  | blank       | Unknown     | 1.00  | 1.00       |        |
| <input checked="" type="checkbox"/> | G3  | blank       | Unknown     | 1.00  | 1.00       |        |
| <input checked="" type="checkbox"/> | G4  | blank       | Unknown     | 1.00  | 1.00       |        |
| <input checked="" type="checkbox"/> | G5  | blank       | Unknown     | 1.00  | 1.00       |        |
| <input checked="" type="checkbox"/> | G6  | blank       | Unknown     | 1.00  | 1.00       |        |
| <input checked="" type="checkbox"/> | G7  | blank       | Unknown     | 1.00  | 1.00       |        |
| <input checked="" type="checkbox"/> | G8  | blank       | Unknown     | 1.00  | 1.00       |        |
| <input checked="" type="checkbox"/> | G9  | blank       | Unknown     | 1.00  | 1.00       |        |
| <input checked="" type="checkbox"/> | G10 | blank       | Unknown     | 1.00  | 1.00       |        |
| <input checked="" type="checkbox"/> | G11 | blank       | Unknown     | 1.00  | 1.00       |        |
| <input checked="" type="checkbox"/> | G12 | blank       | Unknown     | 1.00  | 1.00       |        |
| <input checked="" type="checkbox"/> | H1  | blank       | Unknown     | 1.00  | 1.00       |        |
| <input checked="" type="checkbox"/> | H2  | blank       | Unknown     | 1.00  | 1.00       |        |
| <input checked="" type="checkbox"/> | H3  | blank       | Unknown     | 1.00  | 1.00       |        |
| <input checked="" type="checkbox"/> | H4  | blank       | Unknown     | 1.00  | 1.00       |        |
| <input checked="" type="checkbox"/> | H5  | blank       | Unknown     | 1.00  | 1.00       |        |
| <input checked="" type="checkbox"/> | H6  | blank       | Unknown     | 1.00  | 1.00       |        |
| <input checked="" type="checkbox"/> | H7  | blank       | Unknown     | 1.00  | 1.00       |        |
| <input checked="" type="checkbox"/> | H8  | blank       | Unknown     | 1.00  | 1.00       |        |
| <input checked="" type="checkbox"/> | H9  | blank       | Unknown     | 1.00  | 1.00       |        |
| <input checked="" type="checkbox"/> | H10 | blank       | Unknown     | 1.00  | 1.00       |        |
| <input checked="" type="checkbox"/> | H11 | blank       | Unknown     | 1.00  | 1.00       |        |
| <input checked="" type="checkbox"/> | H12 | blank       | Unknown     | 1.00  | 1.00       |        |

| Group                               |     | Unknown     |             |       |            |        |
|-------------------------------------|-----|-------------|-------------|-------|------------|--------|
| Inc                                 | Pos | Sample Name | Sample Type | Score | Resolution | Status |
| <input checked="" type="checkbox"/> | A2  | GAPDH 1     | Unknown     | 0.65  | 0.18       |        |
| <input checked="" type="checkbox"/> | C6  | RGS1 2      | Unknown     | 0.75  | 0.03       |        |
| <input checked="" type="checkbox"/> | D7  | GAPDH 7     | Unknown     | 0.62  |            |        |
| <input checked="" type="checkbox"/> | E2  | FCER1A 5    | Unknown     | 0.73  | 0.03       |        |
| <input checked="" type="checkbox"/> | F5  | RGS1 6      | Unknown     | 0.67  | 0.26       |        |

### Melting Curves



### Melting Peaks



### Analysis Notes
