# Supplementary material for: Exploring differential gene expression and biomarker potential in systemic lupus erythematosus: a retrospective study
Source: PeerJ journal article supplement (doi:10.7717/peerj.19891), 2025-09-08
Supplement: qPCR_RAW_data.zip [file qPCR_RAW_data.zip]

## Sheet: 补充qpcr
group	sample	gene	1	2	3	AVG		ΔCT	ΔΔCT	2-ΔΔCT
SLE	1	GAPDH	30.93	30.22	30.27	30.4733	30.47
SLE	2	GAPDH	29.75	32.17	28.85	29.3	29.3
SLE	3	GAPDH	29.11	28.48	28.88	28.8233	28.82
SLE	4	GAPDH	23.82	25.92	27.54	26.73	26.73
SLE	1	FCER1A	28.52	29.22	28.43	28.7233	28.72	-1.75	-0.47	1.39
SLE	2	FCER1A	28.34	30.22	27.88	28.11	28.11	-1.19	0.09	0.94
SLE	3	FCER1A	30.55	28.68	27.77	29	29	0.18	1.46	0.36
SLE	4	FCER1A	28.78		26.75	27.765	27.77	1.04	2.32	0.2
SLE	1	RGS1	35	35	32.22	34.0733	34.07	3.6	0.58	0.67
SLE	2	RGS1	32.96	35	35	34.32	34.32	5.02	2	0.25
SLE	3	RGS1	33.84	35	35	34.6133	34.61	5.79	2.77	0.15
SLE	4	RGS1	31.03	30.57	31.84	31.1467	31.15	4.42	1.4	0.38
SLE	5	GAPDH	29.33	30.34	30.7	30.1233	30.12
SLE	6	GAPDH	29.67	31.15	28.85	29.26	29.26
SLE	7	GAPDH	31.24	31.16	29.9	30.7667	30.77
SLE	8	GAPDH	29.51	29.45	29.08	29.3467	29.35
SLE	5	FCER1A	27.13	27.1	27.28	27.17	27.17	-2.95	-1.67	3.18
SLE	6	FCER1A	28.97	28.85	27.06	28.2933	28.29	-0.97	0.31	0.81
SLE	7	FCER1A	29.15	28.85	28.54	28.8467	28.85	-1.92	-0.64	1.56
SLE	8	FCER1A	29.21	28.98	28.8	28.9967	29	-0.35	0.93	0.52
SLE	5	RGS1	28.89	29.48	28.25	28.8733	28.87	-1.25	-4.27	19.29
SLE	6	RGS1	35	35	35	35	35	5.74	2.72	0.15
SLE	7	RGS1	33.1	32.97	32.93	33	33	4.15	1.13	0.46
SLE	8	RGS1	32.61	32.84	33.79	33.08	33.08	4.08	1.06	0.48
SLE	9	GAPDH	28.33	28.66	28.84	28.61	28.61
SLE	10	GAPDH	28.59	28.75	28.63	28.6567	28.66
SLE	11	GAPDH	27.34	28.42	22.31	27.88	27.88
SLE	12	GAPDH	26.79	26.62	24.68	26.03	26.03
SLE	9	FCER1A	31.62	32.5	31.73	31.675	31.68	3.07	4.35	0.05
SLE	10	FCER1A	30.34	30.75	30.59	30.56	30.56	1.9	3.18	0.11
SLE	11	FCER1A	29.4	31.91	17.11	30.655	30.66	2.78	4.06	0.06
SLE	12	FCER1A	30.58	29.62	25.55	27.585	27.59	1.56	2.84	0.14
SLE	9	RGS1	36.64	35.55	35.58	35.9233	35.92	7.31	4.29	0.05
SLE	10	RGS1	30.32	32.44	32.64	31.48	31.48	2.82	-0.2	1.15
SLE	11	RGS1	29.3	28.9	24.66	29.1	29.1	1.22	-1.8	3.48
SLE	12	RGS1	25.89	29.73	26.91	26.4	26.4	0.37	-2.65	6.28
SLE	13	GAPDH	14.66	29.41	10.92	12.79	12.79
SLE	13	FCER1A	11.79	11.52	11.59	11.655	11.66	-1.13	0.15	0.9
SLE	13	RGS1	17.1	12.9	15.05	15.0167	15.02	2.23	-0.79	1.73
control	1	GAPDH	29	32.6	31.98	31.1933	31.19
control	2	GAPDH	28.33	22.67	31.98	30.155	30.16
control	3	GAPDH	29.7	33.53	29.47	29.585	29.59
control	4	GAPDH	31.81	31.68	30.11	31.2	31.2
control	1	FCER1A	29.7	31.65	29.72	30.3567	30.36	-0.83	0.45	0.73
control	2	FCER1A	28.05	28.47	29.94	28.82	28.82	-1.34	-0.06	1.04
control	3	FCER1A	29.19	29.44	29.82	29.315	29.32	-0.27	1.01	0.5
control	4	FCER1A	29.82	29.78	28.59	29.185	29.19	-2.01	-0.73	1.66
control	1	RGS1	34.3	35	33.15	34.15	34.15	2.96	-0.06	1.04
control	2	RGS1	32.22	31.22	31.82	31.7533	31.75	1.59	-1.43	2.69
control	3	RGS1	34.04	32.78	31.24	32.6867	32.69	3.1	0.08	0.95
control	4	RGS1	35	35	35	35	35	3.8	0.78	0.58
control	5	GAPDH	30.94	27.83	31.28	30.0167	30.02
control	6	GAPDH	29.66	31.45	33.32	31.4767	31.48
control	7	GAPDH	32.09	31.18	31.62	31.63	31.63
control	8	GAPDH	31.21	32.42	29.89	31.1733	31.17
control	5	FCER1A	31.07	28.89	29.85	29.9367	29.94	-0.08	1.2	0.44
control	6	FCER1A	28.83	25.93	29.63	28.13	28.13	-3.35	-2.07	4.2
control	7	FCER1A	29.62	29.69	28.91	29.4067	29.41	-2.22	-0.94	1.92
control	8	FCER1A	29.31	28.79	29.56	29.22	29.22	-1.95	-0.67	1.59
control	5	RGS1	33.32	33.86	35	34.06	34.06	4.04	1.02	0.49
control	6	RGS1	32.99	33.67	33.88	33.5133	33.51	2.04	-0.98	1.97
control	7	RGS1	32.47	32.62	31.9	32.33	32.33	0.7	-2.32	4.99
control	8	RGS1	31.77	32.39	31.83	31.9967	32	0.83	-2.19	4.56
control	9	GAPDH	30.7	32.82	35	31.76	31.76
control	10	GAPDH	32.35	29.3	35	30.825	30.83
control	11	GAPDH	25.51	32.47	35	28.99	28.99
	12	GAPDH	35	28.74	35	28.74	28.74
control	9	FCER1A	30	29.91	31.11	30.34	30.34	-1.42	-0.14	1.1
control	10	FCER1A	30.02	35	31.51	30.765	30.77	-0.06	1.22	0.43
control	11	FCER1A	29.17	31.13	30.67	30.3233	30.32	1.33	2.61	0.16
control	12	FCER1A	30.94	30.75	31.26	30.9833	30.98	2.24	3.52	0.09
control	9	RGS1	35	33	35	34.3333	34.33	2.57	-0.43	1.35
control	10	RGS1	35	35	35	35	35	4.17	1.15	0.45
control	11	RGS1	34.54	35	35	34.8467	34.85	5.86	2.84	0.14
control	12	RGS1	32.67	33.81	33.44	33.3067	33.31	4.57	1.55	0.34
control	13	GAPDH	32.05	31.62	35	31.835	31.84
control	14	GAPDH	32.88	31.08	35	31.98	31.98
control	15	GAPDH	33.36	33.2	35	33.28	33.28
control	16	GAPDH	33.2	35	33.35	33.85	33.85
control	13	FCER1A	29.81	29.49	31.04	30.1133	30.11	-1.73	-0.45	1.37
control	14	FCER1A	29.49	28.67	28.74	28.9667	28.97	-3.01	-1.73	3.31
control	15	FCER1A	29.11	32.33	30.88	30.7733	30.77	-2.51	-1.23	2.35
control	16	FCER1A	29.97	30.96	30.64	30.5233	30.52	-3.33	-2.05	4.14
control	13	RGS1	31.9	33.9	35	32.9	32.9	2.79	-0.23	1.17
control	14	RGS1	32.42	32.7	31.23	32.1167	32.12	3.15	0.13	0.91
control	15	RGS1	35	35	33.13	34.3767	34.38	3.61	0.59	0.66
control	16	RGS1	32.74	33.21	35	32.975	32.98	2.46	-0.56	1.47
FCER1A ΔCT AVG	RGS1 ΔCT AVG
-1.28	3.02

## Sheet: Sheet2
FCER1A				RGS1
SLE	1	1.39		0.67
SLE	2	0.94		0.25
SLE	3	0.36		0.15
SLE	4	0.2		0.38
SLE	5	3.18		19.29
SLE	6	0.81		0.15
SLE	7	1.56		0.46
SLE	8	0.52		0.48
SLE	9	0.05		0.05
SLE	10	0.11		1.15
SLE	11	0.06		3.48
SLE	12	0.14		6.28
SLE	13	0.9		1.73
HC	1	0.73		1.04
HC	2	1.04		2.69
HC	3	0.5		0.95
HC	4	1.66		0.58
HC	5	0.44		0.49
HC	6	4.2		1.97
HC	7	1.92		4.99
HC	8	1.59		4.56
HC	9	1.1		1.35
HC	10	0.43		0.45
HC	11	0.16		0.14
HC	12	0.09		0.34
HC	13	1.37		1.17
HC	14	3.31		0.91
HC	15	2.35		0.66
HC	16	4.14		1.47
