# Supplementary material for: Exploring differential gene expression and biomarker potential in systemic lupus erythematosus: a retrospective study
Source: PeerJ journal article supplement (doi:10.7717/peerj.19891), 2025-09-08
Supplement: qPCR_RAW_data.zip [file qPCR_RAW_data.zip]

# cobas® 4800 User Defined Workflow (UDF)

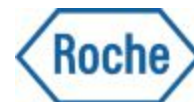

**xj20250528 SLE2**

## Experiment

|               |                      |                    |                                    |
|---------------|----------------------|--------------------|------------------------------------|
| Creation Date | 5/28/2025 9:33:36 AM | Last Modified Date | 6/2/2025 2:48:19 AM                |
| Operator      | System Admin         | Owner              | System Admin                       |
| Start Time    | 5/28/2025 9:38:15 AM | End Time           | 5/28/2025 10:37:47 AM              |
| Run State     | Completed            | Software Version   | LCS480 1.5.1.62 SP3 - UDF 2.1.0.26 |
| Macro         |                      | Macro Owner        |                                    |
| Macro Status  |                      |                    |                                    |
| Templates     | gongying             | Plate ID           |                                    |
| Test ID       |                      | Lot ID             |                                    |
| Color Comp ID |                      |                    |                                    |
| Run Notes     |                      |                    |                                    |

## Programs

|              |         |               |      |
|--------------|---------|---------------|------|
| Program Name | Program |               |      |
| Cycles       | 1       | Analysis Mode | None |

| Target (°C) | Acquisition Mode | Hold (hh:mm:ss) | Ramp Rate (°C/s) | Acquisitions (per °C) | Sec Target (°C) | Step size (°C) | Step Delay (cycles) |
|-------------|------------------|-----------------|------------------|-----------------------|-----------------|----------------|---------------------|
| 95          | None             | 00:00:30        | 4.40             |                       | 0               | 0              | 0                   |

|              |         |               |                |
|--------------|---------|---------------|----------------|
| Program Name | Program |               |                |
| Cycles       | 40      | Analysis Mode | Quantification |

| Target (°C) | Acquisition Mode | Hold (hh:mm:ss) | Ramp Rate (°C/s) | Acquisitions (per °C) | Sec Target (°C) | Step size (°C) | Step Delay (cycles) |
|-------------|------------------|-----------------|------------------|-----------------------|-----------------|----------------|---------------------|
| 95          | None             | 00:00:15        | 4.40             |                       | 0               | 0              | 0                   |
| 60          | Single           | 00:00:30        | 2.20             |                       | 0               | 0              | 0                   |

|              |         |               |                |
|--------------|---------|---------------|----------------|
| Program Name | Program |               |                |
| Cycles       | 1       | Analysis Mode | Melting Curves |

| Target (°C) | Acquisition Mode | Hold (hh:mm:ss) | Ramp Rate (°C/s) | Acquisitions (per °C) | Sec Target (°C) | Step size (°C) | Step Delay (cycles) |
|-------------|------------------|-----------------|------------------|-----------------------|-----------------|----------------|---------------------|
| 95          | None             | 00:01:00        | 4.40             |                       | 0               | 0              | 0                   |
| 60          | None             | 00:00:30        | 2.20             |                       | 0               | 0              | 0                   |
| 90          | Continuous       |                 | 0.11             | 5                     | 0               | 0              | 0                   |

|              |         |               |      |
|--------------|---------|---------------|------|
| Program Name | Program |               |      |
| Cycles       | 1       | Analysis Mode | None |

| Target (°C) | Acquisition Mode | Hold (hh:mm:ss) | Ramp Rate (°C/s) | Acquisitions (per °C) | Sec Target (°C) | Step size (°C) | Step Delay (cycles) |
|-------------|------------------|-----------------|------------------|-----------------------|-----------------|----------------|---------------------|
|-------------|------------------|-----------------|------------------|-----------------------|-----------------|----------------|---------------------|

| Target (°C) | Acquisition Mode | Hold (hh:mm:ss) | Ramp Rate (°C/s) | Acquisitions (per °C) | Sec Target (°C) | Step size (°C) | Step Delay (cycles) |
|-------------|------------------|-----------------|------------------|-----------------------|-----------------|----------------|---------------------|
| 40          | None             | 00:00:30        | 2.20             |                       | 0               | 0              | 0                   |

## Samples

|              |           |             |          |              |  |
|--------------|-----------|-------------|----------|--------------|--|
| Sample Count |           | 96          |          |              |  |
| Subset       |           | All Samples |          |              |  |
| Pos          | Name      | ID          | Repl. Of | Sample Notes |  |
| A1           | GAPDH 9   |             |          |              |  |
| A2           | GAPDH 9   |             |          |              |  |
| A3           | GAPDH 9   |             |          |              |  |
| A4           | GAPDH 10  |             |          |              |  |
| A5           | GAPDH 10  |             |          |              |  |
| A6           | GAPDH 10  |             |          |              |  |
| A7           | GAPDH 11  |             |          |              |  |
| A8           | GAPDH 11  |             |          |              |  |
| A9           | GAPDH 11  |             |          |              |  |
| A10          | GAPDH 12  |             |          |              |  |
| A11          | GAPDH 12  |             |          |              |  |
| A12          | GAPDH 12  |             |          |              |  |
| B1           | FCER1A 9  |             |          |              |  |
| B2           | FCER1A 9  |             |          |              |  |
| B3           | FCER1A 9  |             |          |              |  |
| B4           | FCER1A 10 |             |          |              |  |
| B5           | FCER1A 10 |             |          |              |  |
| B6           | FCER1A 10 |             |          |              |  |
| B7           | FCER1A 11 |             |          |              |  |
| B8           | FCER1A 11 |             |          |              |  |
| B9           | FCER1A 11 |             |          |              |  |
| B10          | FCER1A 12 |             |          |              |  |
| B11          | FCER1A 12 |             |          |              |  |
| B12          | FCER1A 12 |             |          |              |  |
| C1           | RGS1 9    |             |          |              |  |
| C2           | RGS1 9    |             |          |              |  |
| C3           | RGS1 9    |             |          |              |  |
| C4           | RGS1 10   |             |          |              |  |
| C5           | RGS1 10   |             |          |              |  |
| C6           | RGS1 10   |             |          |              |  |
| C7           | RGS1 11   |             |          |              |  |
| C8           | RGS1 11   |             |          |              |  |
| C9           | RGS1 11   |             |          |              |  |
| C10          | RGS1 12   |             |          |              |  |
| C11          | RGS1 12   |             |          |              |  |
| C12          | RGS1 12   |             |          |              |  |

## Samples

| Sample Count |           | 96          |          |              |
|--------------|-----------|-------------|----------|--------------|
| Subset       |           | All Samples |          |              |
| Pos          | Name      | ID          | Repl. Of | Sample Notes |
| D1           | GAPDH 13  |             |          |              |
| D2           | GAPDH 13  |             |          |              |
| D3           | GAPDH 13  |             |          |              |
| D4           | blank     |             |          |              |
| D5           | blank     |             |          |              |
| D6           | blank     |             |          |              |
| D7           | blank     |             |          |              |
| D8           | blank     |             |          |              |
| D9           | blank     |             |          |              |
| D10          | blank     |             |          |              |
| D11          | blank     |             |          |              |
| D12          | blank     |             |          |              |
| E1           | FCER1A 13 |             |          |              |
| E2           | FCER1A 13 |             |          |              |
| E3           | FCER1A 13 |             |          |              |
| E4           | blank     |             |          |              |
| E5           | blank     |             |          |              |
| E6           | blank     |             |          |              |
| E7           | blank     |             |          |              |
| E8           | blank     |             |          |              |
| E9           | blank     |             |          |              |
| E10          | blank     |             |          |              |
| E11          | blank     |             |          |              |
| E12          | blank     |             |          |              |
| F1           | RGS1 13   |             |          |              |
| F2           | RGS1 13   |             |          |              |
| F3           | RGS1 13   |             |          |              |
| F4           | blank     |             |          |              |
| F5           | blank     |             |          |              |
| F6           | blank     |             |          |              |
| F7           | blank     |             |          |              |
| F8           | blank     |             |          |              |
| F9           | blank     |             |          |              |
| F10          | blank     |             |          |              |
| F11          | blank     |             |          |              |
| F12          | blank     |             |          |              |
| G1           | blank     |             |          |              |
| G2           | blank     |             |          |              |
| G3           | blank     |             |          |              |

Samples

|              |       |             |          |              |  |
|--------------|-------|-------------|----------|--------------|--|
| Sample Count |       | 96          |          |              |  |
| Subset       |       | All Samples |          |              |  |
| Pos          | Name  | ID          | Repl. Of | Sample Notes |  |
| G4           | blank |             |          |              |  |
| G5           | blank |             |          |              |  |
| G6           | blank |             |          |              |  |
| G7           | blank |             |          |              |  |
| G8           | blank |             |          |              |  |
| G9           | blank |             |          |              |  |
| G10          | blank |             |          |              |  |
| G11          | blank |             |          |              |  |
| G12          | blank |             |          |              |  |
| H1           | blank |             |          |              |  |
| H2           | blank |             |          |              |  |
| H3           | blank |             |          |              |  |
| H4           | blank |             |          |              |  |
| H5           | blank |             |          |              |  |
| H6           | blank |             |          |              |  |
| H7           | blank |             |          |              |  |
| H8           | blank |             |          |              |  |
| H9           | blank |             |          |              |  |
| H10          | blank |             |          |              |  |
| H11          | blank |             |          |              |  |
| H12          | blank |             |          |              |  |

Instrument

|      |      |               |       |
|------|------|---------------|-------|
| Name | Z480 | Serial Number | 56319 |
|------|------|---------------|-------|

Revision History

|          |      |      |        |
|----------|------|------|--------|
| Revision | Date | User | Reason |
|          |      |      |        |

Abs Quant/2nd Derivative Max for All Samples (Abs Quant/2nd Derivative Max)

Settings

|                    |                 |  |       |  |
|--------------------|-----------------|--|-------|--|
| Channel            | 465-510         |  |       |  |
| Color Compensation | Off             |  |       |  |
| Program            | Program         |  | Units |  |
| Mode               | High Confidence |  |       |  |

|             |             |
|-------------|-------------|
| Subset Name | All Samples |
|-------------|-------------|

Results

|                                                                             |    |               |          |        |
|-----------------------------------------------------------------------------|----|---------------|----------|--------|
| > - Late Cycle (five cycles) has higher uncertainty, ? - Detector Call Type | CP | Concentration | Standard | Status |
|-----------------------------------------------------------------------------|----|---------------|----------|--------|

## Results

| Inc                                 | Pos | Name      | Type    | CP    | Concentration | Standard | Status |
|-------------------------------------|-----|-----------|---------|-------|---------------|----------|--------|
| <input checked="" type="checkbox"/> | A1  | GAPDH 9   | Unknown | 27.98 |               |          |        |
| <input checked="" type="checkbox"/> | A2  | GAPDH 9   | Unknown | 28.43 |               |          |        |
| <input checked="" type="checkbox"/> | A3  | GAPDH 9   | Unknown | 28.30 |               |          |        |
| <input checked="" type="checkbox"/> | A4  | GAPDH 10  | Unknown | 28.26 |               |          |        |
| <input checked="" type="checkbox"/> | A5  | GAPDH 10  | Unknown | 28.14 |               |          |        |
| <input checked="" type="checkbox"/> | A6  | GAPDH 10  | Unknown | 28.30 |               |          |        |
| <input checked="" type="checkbox"/> | A7  | GAPDH 11  | Unknown | 29.46 |               |          |        |
| <input checked="" type="checkbox"/> | A8  | GAPDH 11  | Unknown | 29.26 |               |          |        |
| <input checked="" type="checkbox"/> | A9  | GAPDH 11  | Unknown | 29.15 |               |          |        |
| <input checked="" type="checkbox"/> | A10 | GAPDH 12  | Unknown | 27.92 |               |          |        |
| <input checked="" type="checkbox"/> | A11 | GAPDH 12  | Unknown | 27.75 |               |          |        |
| <input checked="" type="checkbox"/> | A12 | GAPDH 12  | Unknown | 27.71 |               |          |        |
| <input checked="" type="checkbox"/> | B1  | FCER1A 9  | Unknown | 31.00 |               |          |        |
| <input checked="" type="checkbox"/> | B2  | FCER1A 9  | Unknown | 31.22 |               |          |        |
| <input checked="" type="checkbox"/> | B3  | FCER1A 9  | Unknown | 31.03 |               |          |        |
| <input checked="" type="checkbox"/> | B4  | FCER1A 10 | Unknown | 30.00 |               |          |        |
| <input checked="" type="checkbox"/> | B5  | FCER1A 10 | Unknown | 29.91 |               |          |        |
| <input checked="" type="checkbox"/> | B6  | FCER1A 10 | Unknown | 29.91 |               |          |        |
| <input checked="" type="checkbox"/> | B7  | FCER1A 11 | Unknown | 30.93 |               |          |        |
| <input checked="" type="checkbox"/> | B8  | FCER1A 11 | Unknown | 30.29 |               |          |        |
| <input checked="" type="checkbox"/> | B9  | FCER1A 11 | Unknown | 30.13 |               |          |        |
| <input checked="" type="checkbox"/> | B10 | FCER1A 12 | Unknown | 31.54 |               |          |        |
| <input checked="" type="checkbox"/> | B11 | FCER1A 12 | Unknown | 30.92 |               |          |        |
| <input checked="" type="checkbox"/> | B12 | FCER1A 12 | Unknown | 31.49 |               |          |        |
| <input checked="" type="checkbox"/> | C1  | RGS1 9    | Unknown | 35.00 |               |          | >      |
| <input checked="" type="checkbox"/> | C2  | RGS1 9    | Unknown | 35.00 |               |          | >      |
| <input checked="" type="checkbox"/> | C3  | RGS1 9    | Unknown | 35.00 |               |          | >      |
| <input checked="" type="checkbox"/> | C4  | RGS1 10   | Unknown | 31.61 |               |          |        |
| <input checked="" type="checkbox"/> | C5  | RGS1 10   | Unknown | 31.94 |               |          |        |
| <input checked="" type="checkbox"/> | C6  | RGS1 10   | Unknown | 32.62 |               |          |        |
| <input checked="" type="checkbox"/> | C7  | RGS1 11   | Unknown | 29.14 |               |          |        |
| <input checked="" type="checkbox"/> | C8  | RGS1 11   | Unknown | 29.31 |               |          |        |
| <input checked="" type="checkbox"/> | C9  | RGS1 11   | Unknown | 27.91 |               |          |        |
| <input checked="" type="checkbox"/> | C10 | RGS1 12   | Unknown | 29.96 |               |          |        |
| <input checked="" type="checkbox"/> | C11 | RGS1 12   | Unknown | 31.09 |               |          |        |
| <input checked="" type="checkbox"/> | C12 | RGS1 12   | Unknown | 31.10 |               |          |        |
| <input checked="" type="checkbox"/> | D1  | GAPDH 13  | Unknown | 28.80 |               |          |        |

> - Late Cp call (last five cycles) has higher uncertainty, ? - Detector Call uncertain

## Results

| Inc                                 | Pos | Name      | Type    | CP    | Concentration | Standard | Status |
|-------------------------------------|-----|-----------|---------|-------|---------------|----------|--------|
| <input checked="" type="checkbox"/> | D2  | GAPDH 13  | Unknown | 28.80 |               |          |        |
| <input checked="" type="checkbox"/> | D3  | GAPDH 13  | Unknown | 30.54 |               |          |        |
| <input checked="" type="checkbox"/> | D4  | blank     | Unknown |       |               |          |        |
| <input checked="" type="checkbox"/> | D5  | blank     | Unknown |       |               |          |        |
| <input checked="" type="checkbox"/> | D6  | blank     | Unknown |       |               |          |        |
| <input checked="" type="checkbox"/> | D7  | blank     | Unknown |       |               |          |        |
| <input checked="" type="checkbox"/> | D8  | blank     | Unknown |       |               |          |        |
| <input checked="" type="checkbox"/> | D9  | blank     | Unknown |       |               |          |        |
| <input checked="" type="checkbox"/> | D10 | blank     | Unknown |       |               |          |        |
| <input checked="" type="checkbox"/> | D11 | blank     | Unknown |       |               |          |        |
| <input checked="" type="checkbox"/> | D12 | blank     | Unknown |       |               |          |        |
| <input checked="" type="checkbox"/> | E1  | FCER1A 13 | Unknown | 34.19 |               |          |        |
| <input checked="" type="checkbox"/> | E2  | FCER1A 13 | Unknown | 32.17 |               |          |        |
| <input checked="" type="checkbox"/> | E3  | FCER1A 13 | Unknown | 35.00 |               |          | >      |
| <input checked="" type="checkbox"/> | E4  | blank     | Unknown |       |               |          |        |
| <input checked="" type="checkbox"/> | E5  | blank     | Unknown |       |               |          |        |
| <input checked="" type="checkbox"/> | E6  | blank     | Unknown |       |               |          |        |
| <input checked="" type="checkbox"/> | E7  | blank     | Unknown |       |               |          |        |
| <input checked="" type="checkbox"/> | E8  | blank     | Unknown |       |               |          |        |
| <input checked="" type="checkbox"/> | E9  | blank     | Unknown |       |               |          |        |
| <input checked="" type="checkbox"/> | E10 | blank     | Unknown |       |               |          |        |
| <input checked="" type="checkbox"/> | E11 | blank     | Unknown |       |               |          |        |
| <input checked="" type="checkbox"/> | E12 | blank     | Unknown |       |               |          |        |
| <input checked="" type="checkbox"/> | F1  | RGS1 13   | Unknown | 31.79 |               |          |        |
| <input checked="" type="checkbox"/> | F2  | RGS1 13   | Unknown | 31.51 |               |          |        |
| <input checked="" type="checkbox"/> | F3  | RGS1 13   | Unknown | 31.56 |               |          |        |
| <input checked="" type="checkbox"/> | F4  | blank     | Unknown |       |               |          |        |
| <input checked="" type="checkbox"/> | F5  | blank     | Unknown |       |               |          |        |
| <input checked="" type="checkbox"/> | F6  | blank     | Unknown |       |               |          |        |
| <input checked="" type="checkbox"/> | F7  | blank     | Unknown |       |               |          |        |
| <input checked="" type="checkbox"/> | F8  | blank     | Unknown |       |               |          |        |
| <input checked="" type="checkbox"/> | F9  | blank     | Unknown |       |               |          |        |
| <input checked="" type="checkbox"/> | F10 | blank     | Unknown |       |               |          |        |
| <input checked="" type="checkbox"/> | F11 | blank     | Unknown |       |               |          |        |
| <input checked="" type="checkbox"/> | F12 | blank     | Unknown |       |               |          |        |
| <input checked="" type="checkbox"/> | G1  | blank     | Unknown |       |               |          |        |
| <input checked="" type="checkbox"/> | G2  | blank     | Unknown |       |               |          |        |

> - Late Cp call (last five cycles) has higher uncertainty, ? - Detector Call uncertain

## Results

| Inc                                 | Pos | Name  | Type    | CP    | Concentration | Standard | Status |
|-------------------------------------|-----|-------|---------|-------|---------------|----------|--------|
| <input checked="" type="checkbox"/> | G3  | blank | Unknown |       |               |          |        |
| <input checked="" type="checkbox"/> | G4  | blank | Unknown |       |               |          |        |
| <input checked="" type="checkbox"/> | G5  | blank | Unknown |       |               |          |        |
| <input checked="" type="checkbox"/> | G6  | blank | Unknown |       |               |          |        |
| <input checked="" type="checkbox"/> | G7  | blank | Unknown |       |               |          |        |
| <input checked="" type="checkbox"/> | G8  | blank | Unknown |       |               |          |        |
| <input checked="" type="checkbox"/> | G9  | blank | Unknown |       |               |          |        |
| <input checked="" type="checkbox"/> | G10 | blank | Unknown |       |               |          |        |
| <input checked="" type="checkbox"/> | G11 | blank | Unknown |       |               |          |        |
| <input checked="" type="checkbox"/> | G12 | blank | Unknown |       |               |          |        |
| <input checked="" type="checkbox"/> | H1  | blank | Unknown |       |               |          |        |
| <input checked="" type="checkbox"/> | H2  | blank | Unknown | 18.86 |               |          | ?      |
| <input checked="" type="checkbox"/> | H3  | blank | Unknown |       |               |          |        |
| <input checked="" type="checkbox"/> | H4  | blank | Unknown |       |               |          |        |
| <input checked="" type="checkbox"/> | H5  | blank | Unknown |       |               |          |        |
| <input checked="" type="checkbox"/> | H6  | blank | Unknown |       |               |          |        |
| <input checked="" type="checkbox"/> | H7  | blank | Unknown |       |               |          |        |
| <input checked="" type="checkbox"/> | H8  | blank | Unknown |       |               |          |        |
| <input checked="" type="checkbox"/> | H9  | blank | Unknown |       |               |          |        |
| <input checked="" type="checkbox"/> | H10 | blank | Unknown |       |               |          |        |
| <input checked="" type="checkbox"/> | H11 | blank | Unknown | 17.57 |               |          | ?      |
| <input checked="" type="checkbox"/> | H12 | blank | Unknown |       |               |          |        |

> - Late Cp call (last five cycles) has higher uncertainty, ? - Detector Call uncertain

### Amplification Curves

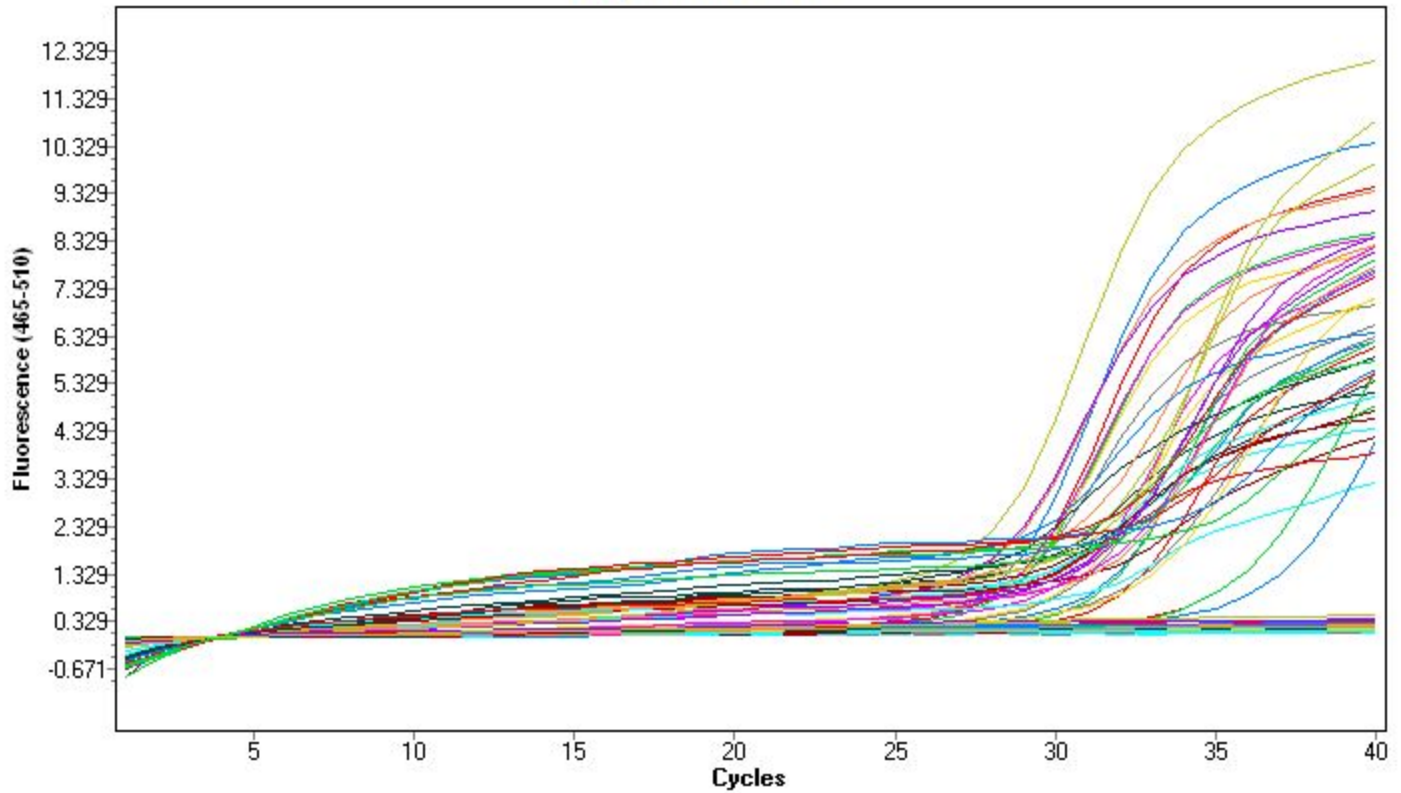

### Standard Curve

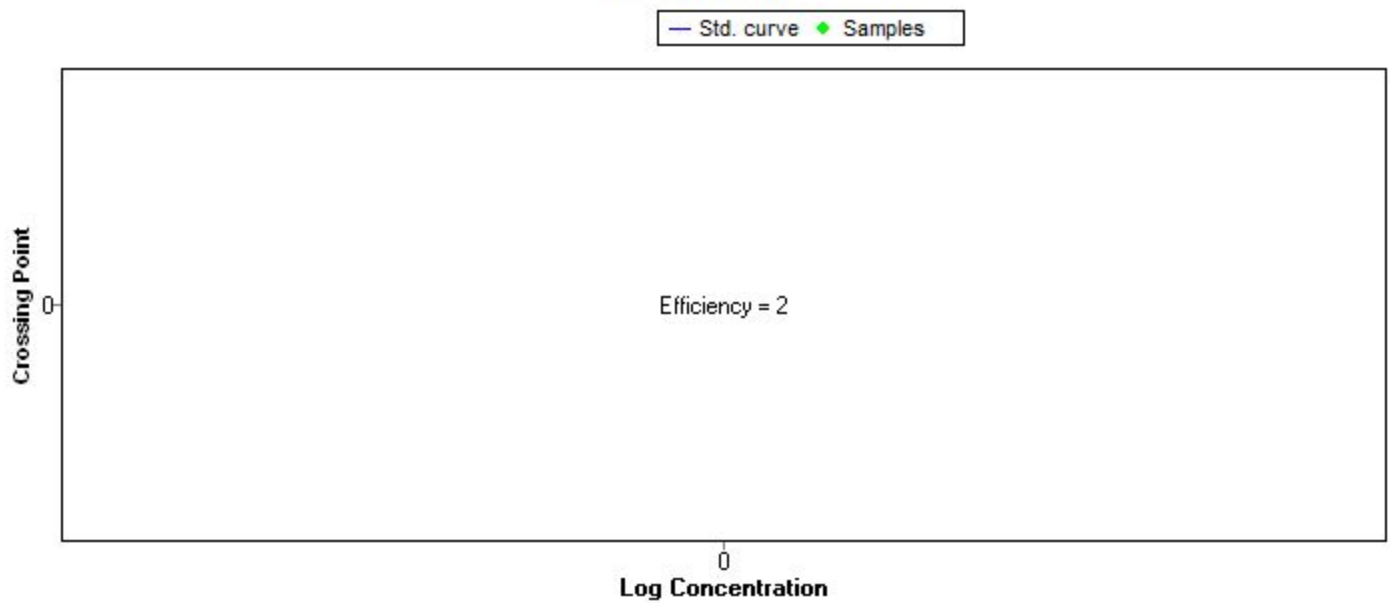

### Analysis Notes

Abs Quant/Fit Points for All Samples (Abs Quant/Fit Points)



## Settings

|                    |                       |                  |        |                    |         |  |
|--------------------|-----------------------|------------------|--------|--------------------|---------|--|
| Channel            | 465-510               |                  |        |                    |         |  |
| Color Compensation | Off                   |                  |        |                    |         |  |
| Standard Curve     | Set Efficiency (2.00) |                  |        |                    |         |  |
| Program            | Program               |                  |        |                    | Units   |  |
| First Cycle        | 1                     | Last Cycle       | 40     | Background         | 2-6     |  |
| Noiseband Method   | Auto                  | Noiseband        | 2.0580 | STD Dev Multiplier | 12.0000 |  |
| # of Fit Points    | 2                     | Threshold Method | Auto   | Threshold          | 2.0580  |  |

|             |             |
|-------------|-------------|
| Subset Name | All Samples |
|-------------|-------------|

## Results

| Inc                                 | Pos | Name      | Type    | CP    | Concentration | Standard | Status |
|-------------------------------------|-----|-----------|---------|-------|---------------|----------|--------|
| <input checked="" type="checkbox"/> | A1  | GAPDH 9   | Unknown | 28.33 |               |          |        |
| <input checked="" type="checkbox"/> | A2  | GAPDH 9   | Unknown | 28.66 |               |          |        |
| <input checked="" type="checkbox"/> | A3  | GAPDH 9   | Unknown | 28.84 |               |          |        |
| <input checked="" type="checkbox"/> | A4  | GAPDH 10  | Unknown | 28.59 |               |          |        |
| <input checked="" type="checkbox"/> | A5  | GAPDH 10  | Unknown | 28.75 |               |          |        |
| <input checked="" type="checkbox"/> | A6  | GAPDH 10  | Unknown | 28.63 |               |          |        |
| <input checked="" type="checkbox"/> | A7  | GAPDH 11  | Unknown | 27.34 |               |          |        |
| <input checked="" type="checkbox"/> | A8  | GAPDH 11  | Unknown | 28.42 |               |          |        |
| <input checked="" type="checkbox"/> | A9  | GAPDH 11  | Unknown | 22.31 |               |          |        |
| <input checked="" type="checkbox"/> | A10 | GAPDH 12  | Unknown | 26.79 |               |          |        |
| <input checked="" type="checkbox"/> | A11 | GAPDH 12  | Unknown | 26.62 |               |          |        |
| <input checked="" type="checkbox"/> | A12 | GAPDH 12  | Unknown | 24.68 |               |          |        |
| <input checked="" type="checkbox"/> | B1  | FCER1A 9  | Unknown | 31.62 |               |          |        |
| <input checked="" type="checkbox"/> | B2  | FCER1A 9  | Unknown | 32.50 |               |          |        |
| <input checked="" type="checkbox"/> | B3  | FCER1A 9  | Unknown | 31.73 |               |          |        |
| <input checked="" type="checkbox"/> | B4  | FCER1A 10 | Unknown | 30.34 |               |          |        |
| <input checked="" type="checkbox"/> | B5  | FCER1A 10 | Unknown | 30.75 |               |          |        |
| <input checked="" type="checkbox"/> | B6  | FCER1A 10 | Unknown | 30.59 |               |          |        |
| <input checked="" type="checkbox"/> | B7  | FCER1A 11 | Unknown | 29.40 |               |          |        |
| <input checked="" type="checkbox"/> | B8  | FCER1A 11 | Unknown | 31.91 |               |          |        |
| <input checked="" type="checkbox"/> | B9  | FCER1A 11 | Unknown | 17.11 |               |          |        |
| <input checked="" type="checkbox"/> | B10 | FCER1A 12 | Unknown | 30.58 |               |          |        |
| <input checked="" type="checkbox"/> | B11 | FCER1A 12 | Unknown | 29.62 |               |          |        |
| <input checked="" type="checkbox"/> | B12 | FCER1A 12 | Unknown | 25.55 |               |          |        |
| <input checked="" type="checkbox"/> | C1  | RGS1 9    | Unknown | 36.64 |               |          |        |
| <input checked="" type="checkbox"/> | C2  | RGS1 9    | Unknown | 35.55 |               |          |        |
| <input checked="" type="checkbox"/> | C3  | RGS1 9    | Unknown | 35.58 |               |          |        |

## Results

| Inc                                 | Pos | Name      | Type    | CP    | Concentration | Standard | Status |
|-------------------------------------|-----|-----------|---------|-------|---------------|----------|--------|
| <input checked="" type="checkbox"/> | C4  | RGS1 10   | Unknown | 30.32 |               |          |        |
| <input checked="" type="checkbox"/> | C5  | RGS1 10   | Unknown | 32.44 |               |          |        |
| <input checked="" type="checkbox"/> | C6  | RGS1 10   | Unknown | 32.64 |               |          |        |
| <input checked="" type="checkbox"/> | C7  | RGS1 11   | Unknown | 29.30 |               |          |        |
| <input checked="" type="checkbox"/> | C8  | RGS1 11   | Unknown | 28.90 |               |          |        |
| <input checked="" type="checkbox"/> | C9  | RGS1 11   | Unknown | 24.66 |               |          |        |
| <input checked="" type="checkbox"/> | C10 | RGS1 12   | Unknown | 25.89 |               |          |        |
| <input checked="" type="checkbox"/> | C11 | RGS1 12   | Unknown | 29.73 |               |          |        |
| <input checked="" type="checkbox"/> | C12 | RGS1 12   | Unknown | 26.91 |               |          |        |
| <input checked="" type="checkbox"/> | D1  | GAPDH 13  | Unknown | 14.66 |               |          |        |
| <input checked="" type="checkbox"/> | D2  | GAPDH 13  | Unknown | 29.41 |               |          |        |
| <input checked="" type="checkbox"/> | D3  | GAPDH 13  | Unknown | 10.92 |               |          |        |
| <input checked="" type="checkbox"/> | D4  | blank     | Unknown |       |               |          |        |
| <input checked="" type="checkbox"/> | D5  | blank     | Unknown |       |               |          |        |
| <input checked="" type="checkbox"/> | D6  | blank     | Unknown |       |               |          |        |
| <input checked="" type="checkbox"/> | D7  | blank     | Unknown |       |               |          |        |
| <input checked="" type="checkbox"/> | D8  | blank     | Unknown |       |               |          |        |
| <input checked="" type="checkbox"/> | D9  | blank     | Unknown |       |               |          |        |
| <input checked="" type="checkbox"/> | D10 | blank     | Unknown |       |               |          |        |
| <input checked="" type="checkbox"/> | D11 | blank     | Unknown |       |               |          |        |
| <input checked="" type="checkbox"/> | D12 | blank     | Unknown |       |               |          |        |
| <input checked="" type="checkbox"/> | E1  | FCER1A 13 | Unknown | 11.79 |               |          |        |
| <input checked="" type="checkbox"/> | E2  | FCER1A 13 | Unknown | 11.52 |               |          |        |
| <input checked="" type="checkbox"/> | E3  | FCER1A 13 | Unknown | 11.59 |               |          |        |
| <input checked="" type="checkbox"/> | E4  | blank     | Unknown |       |               |          |        |
| <input checked="" type="checkbox"/> | E5  | blank     | Unknown |       |               |          |        |
| <input checked="" type="checkbox"/> | E6  | blank     | Unknown |       |               |          |        |
| <input checked="" type="checkbox"/> | E7  | blank     | Unknown |       |               |          |        |
| <input checked="" type="checkbox"/> | E8  | blank     | Unknown |       |               |          |        |
| <input checked="" type="checkbox"/> | E9  | blank     | Unknown |       |               |          |        |
| <input checked="" type="checkbox"/> | E10 | blank     | Unknown |       |               |          |        |
| <input checked="" type="checkbox"/> | E11 | blank     | Unknown |       |               |          |        |
| <input checked="" type="checkbox"/> | E12 | blank     | Unknown |       |               |          |        |
| <input checked="" type="checkbox"/> | F1  | RGS1 13   | Unknown | 17.10 |               |          |        |
| <input checked="" type="checkbox"/> | F2  | RGS1 13   | Unknown | 12.90 |               |          |        |
| <input checked="" type="checkbox"/> | F3  | RGS1 13   | Unknown | 15.05 |               |          |        |
| <input checked="" type="checkbox"/> | F4  | blank     | Unknown |       |               |          |        |

## Results

| Inc                                 | Pos | Name  | Type    | CP | Concentration | Standard | Status |
|-------------------------------------|-----|-------|---------|----|---------------|----------|--------|
| <input checked="" type="checkbox"/> | F5  | blank | Unknown |    |               |          |        |
| <input checked="" type="checkbox"/> | F6  | blank | Unknown |    |               |          |        |
| <input checked="" type="checkbox"/> | F7  | blank | Unknown |    |               |          |        |
| <input checked="" type="checkbox"/> | F8  | blank | Unknown |    |               |          |        |
| <input checked="" type="checkbox"/> | F9  | blank | Unknown |    |               |          |        |
| <input checked="" type="checkbox"/> | F10 | blank | Unknown |    |               |          |        |
| <input checked="" type="checkbox"/> | F11 | blank | Unknown |    |               |          |        |
| <input checked="" type="checkbox"/> | F12 | blank | Unknown |    |               |          |        |
| <input checked="" type="checkbox"/> | G1  | blank | Unknown |    |               |          |        |
| <input checked="" type="checkbox"/> | G2  | blank | Unknown |    |               |          |        |
| <input checked="" type="checkbox"/> | G3  | blank | Unknown |    |               |          |        |
| <input checked="" type="checkbox"/> | G4  | blank | Unknown |    |               |          |        |
| <input checked="" type="checkbox"/> | G5  | blank | Unknown |    |               |          |        |
| <input checked="" type="checkbox"/> | G6  | blank | Unknown |    |               |          |        |
| <input checked="" type="checkbox"/> | G7  | blank | Unknown |    |               |          |        |
| <input checked="" type="checkbox"/> | G8  | blank | Unknown |    |               |          |        |
| <input checked="" type="checkbox"/> | G9  | blank | Unknown |    |               |          |        |
| <input checked="" type="checkbox"/> | G10 | blank | Unknown |    |               |          |        |
| <input checked="" type="checkbox"/> | G11 | blank | Unknown |    |               |          |        |
| <input checked="" type="checkbox"/> | G12 | blank | Unknown |    |               |          |        |
| <input checked="" type="checkbox"/> | H1  | blank | Unknown |    |               |          |        |
| <input checked="" type="checkbox"/> | H2  | blank | Unknown |    |               |          |        |
| <input checked="" type="checkbox"/> | H3  | blank | Unknown |    |               |          |        |
| <input checked="" type="checkbox"/> | H4  | blank | Unknown |    |               |          |        |
| <input checked="" type="checkbox"/> | H5  | blank | Unknown |    |               |          |        |
| <input checked="" type="checkbox"/> | H6  | blank | Unknown |    |               |          |        |
| <input checked="" type="checkbox"/> | H7  | blank | Unknown |    |               |          |        |
| <input checked="" type="checkbox"/> | H8  | blank | Unknown |    |               |          |        |
| <input checked="" type="checkbox"/> | H9  | blank | Unknown |    |               |          |        |
| <input checked="" type="checkbox"/> | H10 | blank | Unknown |    |               |          |        |
| <input checked="" type="checkbox"/> | H11 | blank | Unknown |    |               |          |        |
| <input checked="" type="checkbox"/> | H12 | blank | Unknown |    |               |          |        |

**Amplification Curves**

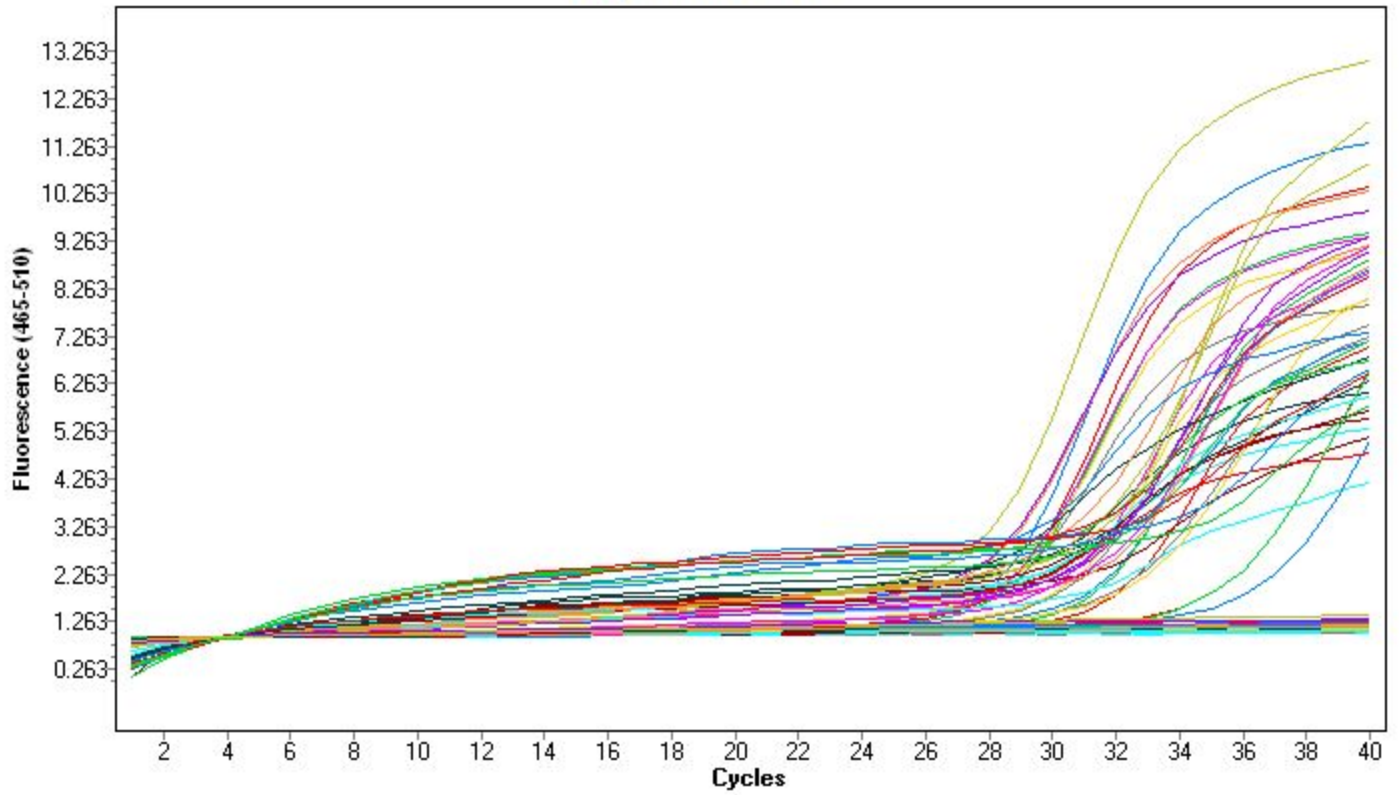

**Amplification Curves**

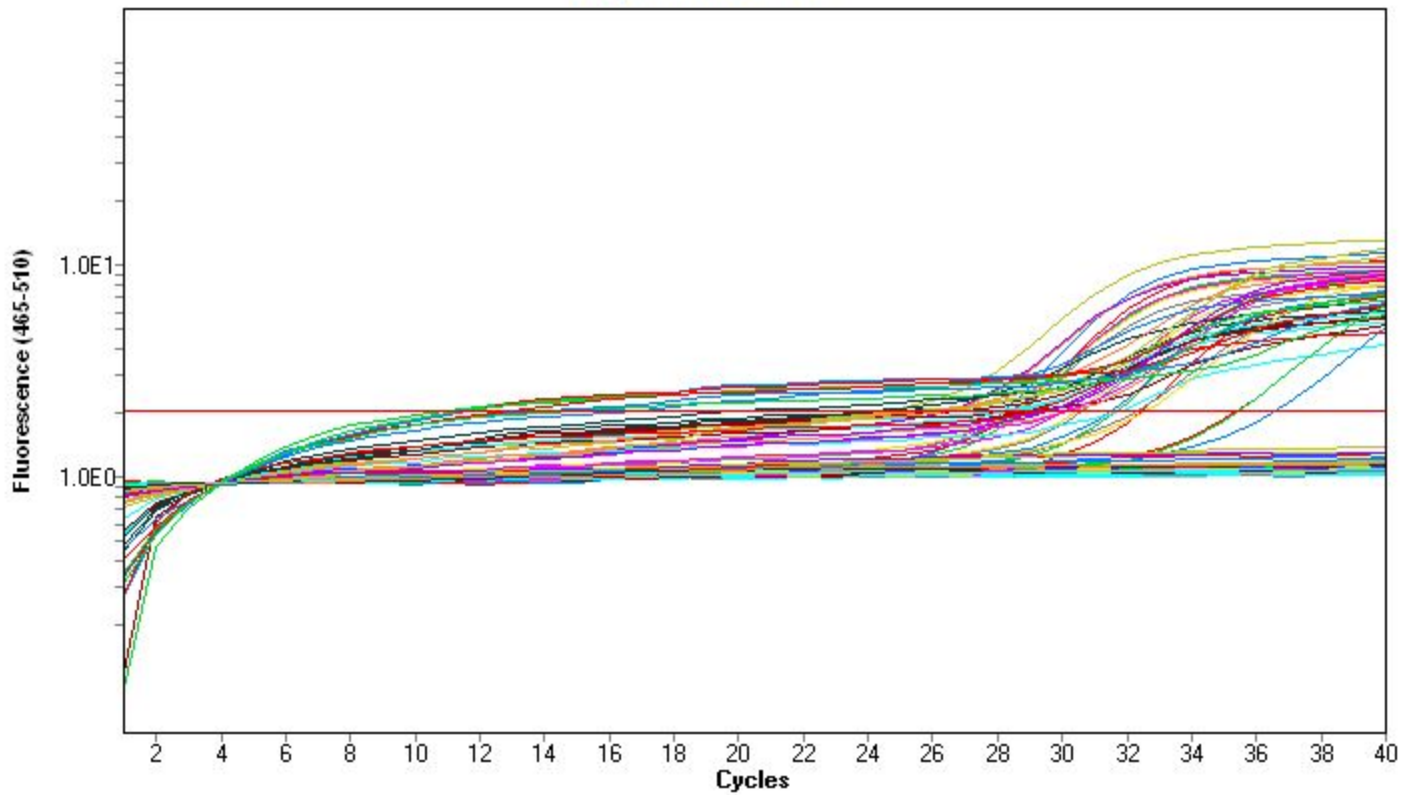

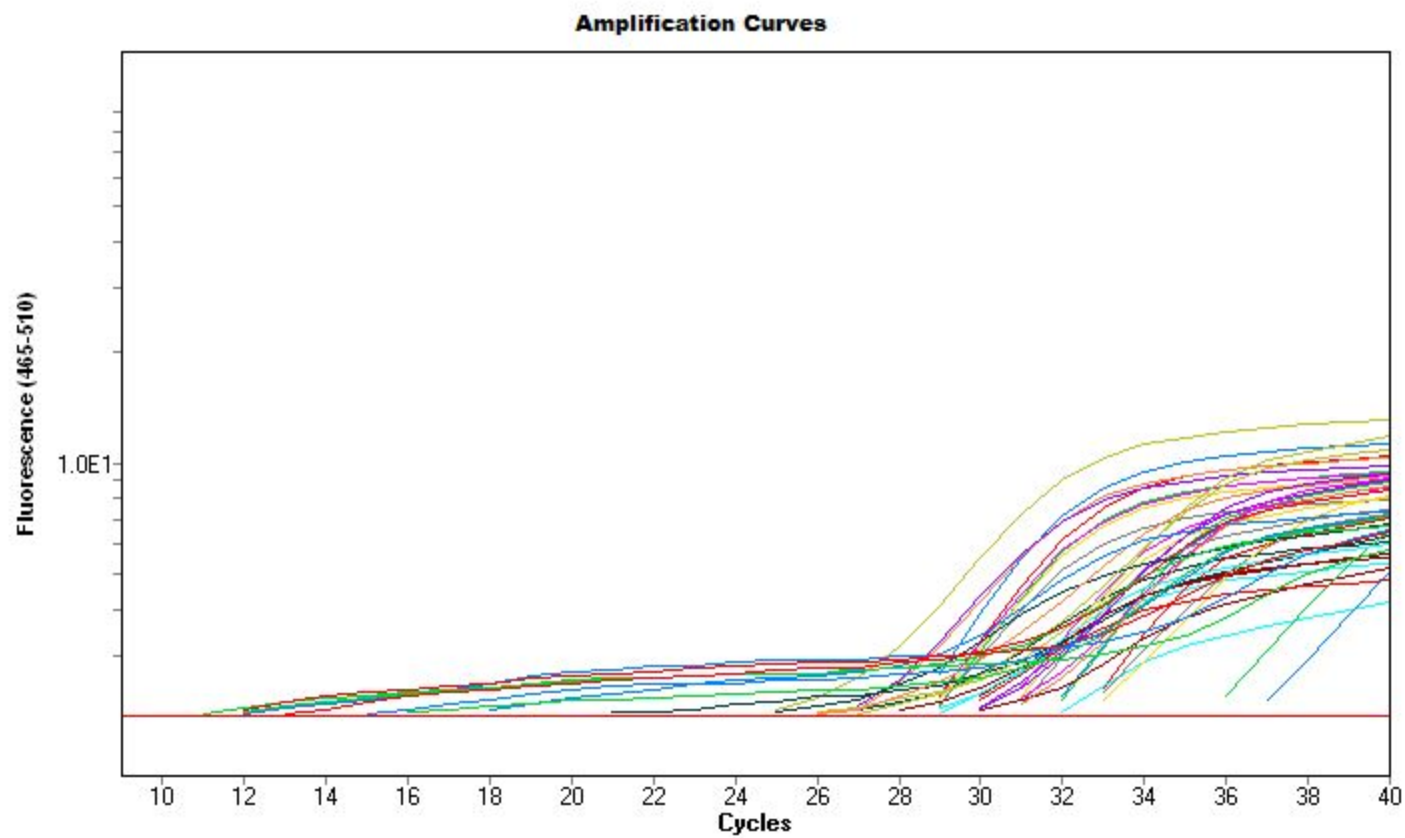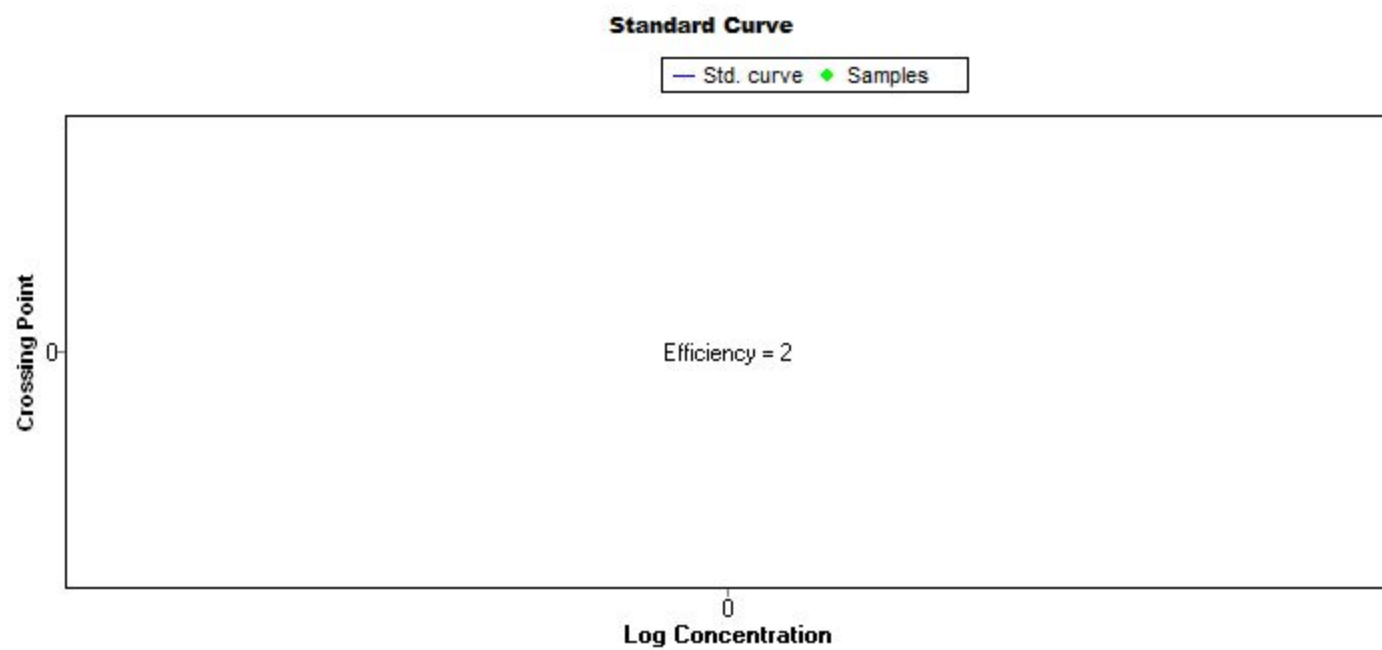

**Analysis Notes**

**Gene Scanning for All Samples (Gene Scanning)**

|               |             |                     |             |
|---------------|-------------|---------------------|-------------|
| Channel       | 465-510     | Color Compensation  | Off         |
| Program Name  | Program     |                     |             |
| Stds Settings | Auto-Group  |                     |             |
| Sensitivity   | 0.30        | Threshold (TmShift) | 5.000       |
| Pre-melt      | 67.26-69.72 | Post-melt Temp      | 87.78-88.77 |

|             |             |
|-------------|-------------|
| Subset Name | All Samples |
|-------------|-------------|

## Results

| Inc                                 | Pos. | Sample Name | Sample Type | Group   | Status |
|-------------------------------------|------|-------------|-------------|---------|--------|
| <input checked="" type="checkbox"/> | A1   | GAPDH 9     | Unknown     | 3       |        |
| <input checked="" type="checkbox"/> | A2   | GAPDH 9     | Unknown     | 4       |        |
| <input checked="" type="checkbox"/> | A3   | GAPDH 9     | Unknown     | Unknown |        |
| <input checked="" type="checkbox"/> | A4   | GAPDH 10    | Unknown     | 6       |        |
| <input checked="" type="checkbox"/> | A5   | GAPDH 10    | Unknown     | 3       |        |
| <input checked="" type="checkbox"/> | A6   | GAPDH 10    | Unknown     | 3       |        |
| <input checked="" type="checkbox"/> | A7   | GAPDH 11    | Unknown     | Unknown |        |
| <input checked="" type="checkbox"/> | A8   | GAPDH 11    | Unknown     | 4       |        |
| <input checked="" type="checkbox"/> | A9   | GAPDH 11    | Unknown     | 4       |        |
| <input checked="" type="checkbox"/> | A10  | GAPDH 12    | Unknown     | 4       |        |
| <input checked="" type="checkbox"/> | A11  | GAPDH 12    | Unknown     | 3       |        |
| <input checked="" type="checkbox"/> | A12  | GAPDH 12    | Unknown     | 3       |        |
| <input checked="" type="checkbox"/> | B1   | FCER1A 9    | Unknown     | 1       |        |
| <input checked="" type="checkbox"/> | B2   | FCER1A 9    | Unknown     | 1       |        |
| <input checked="" type="checkbox"/> | B3   | FCER1A 9    | Unknown     | 1       |        |
| <input checked="" type="checkbox"/> | B4   | FCER1A 10   | Unknown     | 1       |        |
| <input checked="" type="checkbox"/> | B5   | FCER1A 10   | Unknown     | 1       |        |
| <input checked="" type="checkbox"/> | B6   | FCER1A 10   | Unknown     | 1       |        |
| <input checked="" type="checkbox"/> | B7   | FCER1A 11   | Unknown     | 1       |        |
| <input checked="" type="checkbox"/> | B8   | FCER1A 11   | Unknown     | 1       |        |
| <input checked="" type="checkbox"/> | B9   | FCER1A 11   | Unknown     | 1       |        |
| <input checked="" type="checkbox"/> | B10  | FCER1A 12   | Unknown     | 1       |        |
| <input checked="" type="checkbox"/> | B11  | FCER1A 12   | Unknown     | 1       |        |
| <input checked="" type="checkbox"/> | B12  | FCER1A 12   | Unknown     | 1       |        |
| <input checked="" type="checkbox"/> | C1   | RGS1 9      | Unknown     | Unknown |        |
| <input checked="" type="checkbox"/> | C2   | RGS1 9      | Unknown     | 5       |        |
| <input checked="" type="checkbox"/> | C3   | RGS1 9      | Unknown     | 5       |        |
| <input checked="" type="checkbox"/> | C4   | RGS1 10     | Unknown     | 2       |        |
| <input checked="" type="checkbox"/> | C5   | RGS1 10     | Unknown     | 2       |        |
| <input checked="" type="checkbox"/> | C6   | RGS1 10     | Unknown     | 2       |        |
| <input checked="" type="checkbox"/> | C7   | RGS1 11     | Unknown     | 2       |        |

**Results**

| Inc                                 | Pos. | Sample Name | Sample Type | Group    | Status |
|-------------------------------------|------|-------------|-------------|----------|--------|
| <input checked="" type="checkbox"/> | C8   | RGS1 11     | Unknown     | 2        |        |
| <input checked="" type="checkbox"/> | C9   | RGS1 11     | Unknown     | 2        |        |
| <input checked="" type="checkbox"/> | C10  | RGS1 12     | Unknown     | Unknown  |        |
| <input checked="" type="checkbox"/> | C11  | RGS1 12     | Unknown     | Unknown  |        |
| <input checked="" type="checkbox"/> | C12  | RGS1 12     | Unknown     | 2        |        |
| <input checked="" type="checkbox"/> | D1   | GAPDH 13    | Unknown     | Unknown  |        |
| <input checked="" type="checkbox"/> | D2   | GAPDH 13    | Unknown     | 4        |        |
| <input checked="" type="checkbox"/> | D3   | GAPDH 13    | Unknown     | 3        |        |
| <input checked="" type="checkbox"/> | D4   | blank       | Unknown     | Negative |        |
| <input checked="" type="checkbox"/> | D5   | blank       | Unknown     | Negative |        |
| <input checked="" type="checkbox"/> | D6   | blank       | Unknown     | Negative |        |
| <input checked="" type="checkbox"/> | D7   | blank       | Unknown     | Negative |        |
| <input checked="" type="checkbox"/> | D8   | blank       | Unknown     | Negative |        |
| <input checked="" type="checkbox"/> | D9   | blank       | Unknown     | Negative |        |
| <input checked="" type="checkbox"/> | D10  | blank       | Unknown     | Negative |        |
| <input checked="" type="checkbox"/> | D11  | blank       | Unknown     | Negative |        |
| <input checked="" type="checkbox"/> | D12  | blank       | Unknown     | Negative |        |
| <input checked="" type="checkbox"/> | E1   | FCER1A 13   | Unknown     | 1        |        |
| <input checked="" type="checkbox"/> | E2   | FCER1A 13   | Unknown     | Unknown  |        |
| <input checked="" type="checkbox"/> | E3   | FCER1A 13   | Unknown     | 1        |        |
| <input checked="" type="checkbox"/> | E4   | blank       | Unknown     | Negative |        |
| <input checked="" type="checkbox"/> | E5   | blank       | Unknown     | Negative |        |
| <input checked="" type="checkbox"/> | E6   | blank       | Unknown     | Negative |        |
| <input checked="" type="checkbox"/> | E7   | blank       | Unknown     | Negative |        |
| <input checked="" type="checkbox"/> | E8   | blank       | Unknown     | Negative |        |
| <input checked="" type="checkbox"/> | E9   | blank       | Unknown     | Negative |        |
| <input checked="" type="checkbox"/> | E10  | blank       | Unknown     | Negative |        |
| <input checked="" type="checkbox"/> | E11  | blank       | Unknown     | Negative |        |
| <input checked="" type="checkbox"/> | E12  | blank       | Unknown     | Negative |        |
| <input checked="" type="checkbox"/> | F1   | RGS1 13     | Unknown     | Unknown  |        |
| <input checked="" type="checkbox"/> | F2   | RGS1 13     | Unknown     | 2        |        |
| <input checked="" type="checkbox"/> | F3   | RGS1 13     | Unknown     | 2        |        |
| <input checked="" type="checkbox"/> | F4   | blank       | Unknown     | Negative |        |
| <input checked="" type="checkbox"/> | F5   | blank       | Unknown     | Negative |        |
| <input checked="" type="checkbox"/> | F6   | blank       | Unknown     | Negative |        |
| <input checked="" type="checkbox"/> | F7   | blank       | Unknown     | Negative |        |
| <input checked="" type="checkbox"/> | F8   | blank       | Unknown     | Negative |        |
| <input checked="" type="checkbox"/> | F9   | blank       | Unknown     | Negative |        |

**Results**

| Inc                                 | Pos. | Sample Name | Sample Type | Group    | Status |
|-------------------------------------|------|-------------|-------------|----------|--------|
| <input checked="" type="checkbox"/> | F10  | blank       | Unknown     | Negative |        |
| <input checked="" type="checkbox"/> | F11  | blank       | Unknown     | Negative |        |
| <input checked="" type="checkbox"/> | F12  | blank       | Unknown     | Negative |        |
| <input checked="" type="checkbox"/> | G1   | blank       | Unknown     | Negative |        |
| <input checked="" type="checkbox"/> | G2   | blank       | Unknown     | Negative |        |
| <input checked="" type="checkbox"/> | G3   | blank       | Unknown     | Negative |        |
| <input checked="" type="checkbox"/> | G4   | blank       | Unknown     | Negative |        |
| <input checked="" type="checkbox"/> | G5   | blank       | Unknown     | Negative |        |
| <input checked="" type="checkbox"/> | G6   | blank       | Unknown     | Negative |        |
| <input checked="" type="checkbox"/> | G7   | blank       | Unknown     | Negative |        |
| <input checked="" type="checkbox"/> | G8   | blank       | Unknown     | Negative |        |
| <input checked="" type="checkbox"/> | G9   | blank       | Unknown     | Negative |        |
| <input checked="" type="checkbox"/> | G10  | blank       | Unknown     | Negative |        |
| <input checked="" type="checkbox"/> | G11  | blank       | Unknown     | Negative |        |
| <input checked="" type="checkbox"/> | G12  | blank       | Unknown     | Negative |        |
| <input checked="" type="checkbox"/> | H1   | blank       | Unknown     | Negative |        |
| <input checked="" type="checkbox"/> | H2   | blank       | Unknown     | Negative |        |
| <input checked="" type="checkbox"/> | H3   | blank       | Unknown     | Negative |        |
| <input checked="" type="checkbox"/> | H4   | blank       | Unknown     | Negative |        |
| <input checked="" type="checkbox"/> | H5   | blank       | Unknown     | Negative |        |
| <input checked="" type="checkbox"/> | H6   | blank       | Unknown     | Negative |        |
| <input checked="" type="checkbox"/> | H7   | blank       | Unknown     | Negative |        |
| <input checked="" type="checkbox"/> | H8   | blank       | Unknown     | Negative |        |
| <input checked="" type="checkbox"/> | H9   | blank       | Unknown     | Negative |        |
| <input checked="" type="checkbox"/> | H10  | blank       | Unknown     | Negative |        |
| <input checked="" type="checkbox"/> | H11  | blank       | Unknown     | Negative |        |
| <input checked="" type="checkbox"/> | H12  | blank       | Unknown     | Negative |        |

**Group 1**

| Inc                                 | Pos | Sample Name | Sample Type |
|-------------------------------------|-----|-------------|-------------|
| <input checked="" type="checkbox"/> | B1  | FCER1A 9    | Unknown     |
| <input checked="" type="checkbox"/> | B2  | FCER1A 9    | Unknown     |
| <input checked="" type="checkbox"/> | B3  | FCER1A 9    | Unknown     |
| <input checked="" type="checkbox"/> | B4  | FCER1A 10   | Unknown     |
| <input checked="" type="checkbox"/> | B5  | FCER1A 10   | Unknown     |
| <input checked="" type="checkbox"/> | B6  | FCER1A 10   | Unknown     |
| <input checked="" type="checkbox"/> | B7  | FCER1A 11   | Unknown     |
| <input checked="" type="checkbox"/> | B8  | FCER1A 11   | Unknown     |
| <input checked="" type="checkbox"/> | B9  | FCER1A 11   | Unknown     |



| <b>Group 1</b>                      |     |             |             |
|-------------------------------------|-----|-------------|-------------|
| Inc                                 | Pos | Sample Name | Sample Type |
| <input checked="" type="checkbox"/> | B10 | FCER1A 12   | Unknown     |
| <input checked="" type="checkbox"/> | B11 | FCER1A 12   | Unknown     |
| <input checked="" type="checkbox"/> | B12 | FCER1A 12   | Unknown     |
| <input checked="" type="checkbox"/> | E1  | FCER1A 13   | Unknown     |
| <input checked="" type="checkbox"/> | E3  | FCER1A 13   | Unknown     |
| <b>Group 2</b>                      |     |             |             |
| Inc                                 | Pos | Sample Name | Sample Type |
| <input checked="" type="checkbox"/> | C4  | RGS1 10     | Unknown     |
| <input checked="" type="checkbox"/> | C5  | RGS1 10     | Unknown     |
| <input checked="" type="checkbox"/> | C6  | RGS1 10     | Unknown     |
| <input checked="" type="checkbox"/> | C7  | RGS1 11     | Unknown     |
| <input checked="" type="checkbox"/> | C8  | RGS1 11     | Unknown     |
| <input checked="" type="checkbox"/> | C9  | RGS1 11     | Unknown     |
| <input checked="" type="checkbox"/> | C12 | RGS1 12     | Unknown     |
| <input checked="" type="checkbox"/> | F2  | RGS1 13     | Unknown     |
| <input checked="" type="checkbox"/> | F3  | RGS1 13     | Unknown     |
| <b>Group 3</b>                      |     |             |             |
| Inc                                 | Pos | Sample Name | Sample Type |
| <input checked="" type="checkbox"/> | A1  | GAPDH 9     | Unknown     |
| <input checked="" type="checkbox"/> | A5  | GAPDH 10    | Unknown     |
| <input checked="" type="checkbox"/> | A6  | GAPDH 10    | Unknown     |
| <input checked="" type="checkbox"/> | A11 | GAPDH 12    | Unknown     |
| <input checked="" type="checkbox"/> | A12 | GAPDH 12    | Unknown     |
| <input checked="" type="checkbox"/> | D3  | GAPDH 13    | Unknown     |
| <b>Group 4</b>                      |     |             |             |
| Inc                                 | Pos | Sample Name | Sample Type |
| <input checked="" type="checkbox"/> | A2  | GAPDH 9     | Unknown     |
| <input checked="" type="checkbox"/> | A8  | GAPDH 11    | Unknown     |
| <input checked="" type="checkbox"/> | A9  | GAPDH 11    | Unknown     |
| <input checked="" type="checkbox"/> | A10 | GAPDH 12    | Unknown     |
| <input checked="" type="checkbox"/> | D2  | GAPDH 13    | Unknown     |
| <b>Group 5</b>                      |     |             |             |
| Inc                                 | Pos | Sample Name | Sample Type |
| <input checked="" type="checkbox"/> | C2  | RGS1 9      | Unknown     |
| <input checked="" type="checkbox"/> | C3  | RGS1 9      | Unknown     |

| <b>Group</b> 6                      |     |             |             |
|-------------------------------------|-----|-------------|-------------|
| Inc                                 | Pos | Sample Name | Sample Type |
| <input checked="" type="checkbox"/> | A4  | GAPDH 10    | Unknown     |
| <b>Group</b> Negative               |     |             |             |
| Inc                                 | Pos | Sample Name | Sample Type |
| <input checked="" type="checkbox"/> | D4  | blank       | Unknown     |
| <input checked="" type="checkbox"/> | D5  | blank       | Unknown     |
| <input checked="" type="checkbox"/> | D6  | blank       | Unknown     |
| <input checked="" type="checkbox"/> | D7  | blank       | Unknown     |
| <input checked="" type="checkbox"/> | D8  | blank       | Unknown     |
| <input checked="" type="checkbox"/> | D9  | blank       | Unknown     |
| <input checked="" type="checkbox"/> | D10 | blank       | Unknown     |
| <input checked="" type="checkbox"/> | D11 | blank       | Unknown     |
| <input checked="" type="checkbox"/> | D12 | blank       | Unknown     |
| <input checked="" type="checkbox"/> | E4  | blank       | Unknown     |
| <input checked="" type="checkbox"/> | E5  | blank       | Unknown     |
| <input checked="" type="checkbox"/> | E6  | blank       | Unknown     |
| <input checked="" type="checkbox"/> | E7  | blank       | Unknown     |
| <input checked="" type="checkbox"/> | E8  | blank       | Unknown     |
| <input checked="" type="checkbox"/> | E9  | blank       | Unknown     |
| <input checked="" type="checkbox"/> | E10 | blank       | Unknown     |
| <input checked="" type="checkbox"/> | E11 | blank       | Unknown     |
| <input checked="" type="checkbox"/> | E12 | blank       | Unknown     |
| <input checked="" type="checkbox"/> | F4  | blank       | Unknown     |
| <input checked="" type="checkbox"/> | F5  | blank       | Unknown     |
| <input checked="" type="checkbox"/> | F6  | blank       | Unknown     |
| <input checked="" type="checkbox"/> | F7  | blank       | Unknown     |
| <input checked="" type="checkbox"/> | F8  | blank       | Unknown     |
| <input checked="" type="checkbox"/> | F9  | blank       | Unknown     |
| <input checked="" type="checkbox"/> | F10 | blank       | Unknown     |
| <input checked="" type="checkbox"/> | F11 | blank       | Unknown     |
| <input checked="" type="checkbox"/> | F12 | blank       | Unknown     |
| <input checked="" type="checkbox"/> | G1  | blank       | Unknown     |
| <input checked="" type="checkbox"/> | G2  | blank       | Unknown     |
| <input checked="" type="checkbox"/> | G3  | blank       | Unknown     |
| <input checked="" type="checkbox"/> | G4  | blank       | Unknown     |
| <input checked="" type="checkbox"/> | G5  | blank       | Unknown     |
| <input checked="" type="checkbox"/> | G6  | blank       | Unknown     |
| <input checked="" type="checkbox"/> | G7  | blank       | Unknown     |
| <input checked="" type="checkbox"/> | G8  | blank       | Unknown     |

| Group Negative                      |     |             |             |
|-------------------------------------|-----|-------------|-------------|
| Inc                                 | Pos | Sample Name | Sample Type |
| <input checked="" type="checkbox"/> | G9  | blank       | Unknown     |
| <input checked="" type="checkbox"/> | G10 | blank       | Unknown     |
| <input checked="" type="checkbox"/> | G11 | blank       | Unknown     |
| <input checked="" type="checkbox"/> | G12 | blank       | Unknown     |
| <input checked="" type="checkbox"/> | H1  | blank       | Unknown     |
| <input checked="" type="checkbox"/> | H2  | blank       | Unknown     |
| <input checked="" type="checkbox"/> | H3  | blank       | Unknown     |
| <input checked="" type="checkbox"/> | H4  | blank       | Unknown     |
| <input checked="" type="checkbox"/> | H5  | blank       | Unknown     |
| <input checked="" type="checkbox"/> | H6  | blank       | Unknown     |
| <input checked="" type="checkbox"/> | H7  | blank       | Unknown     |
| <input checked="" type="checkbox"/> | H8  | blank       | Unknown     |
| <input checked="" type="checkbox"/> | H9  | blank       | Unknown     |
| <input checked="" type="checkbox"/> | H10 | blank       | Unknown     |
| <input checked="" type="checkbox"/> | H11 | blank       | Unknown     |
| <input checked="" type="checkbox"/> | H12 | blank       | Unknown     |

| Group Unknown                       |     |             |             |
|-------------------------------------|-----|-------------|-------------|
| Inc                                 | Pos | Sample Name | Sample Type |
| <input checked="" type="checkbox"/> | A3  | GAPDH 9     | Unknown     |
| <input checked="" type="checkbox"/> | A7  | GAPDH 11    | Unknown     |
| <input checked="" type="checkbox"/> | C1  | RGS1 9      | Unknown     |
| <input checked="" type="checkbox"/> | C10 | RGS1 12     | Unknown     |
| <input checked="" type="checkbox"/> | C11 | RGS1 12     | Unknown     |
| <input checked="" type="checkbox"/> | D1  | GAPDH 13    | Unknown     |
| <input checked="" type="checkbox"/> | E2  | FCER1A 13   | Unknown     |
| <input checked="" type="checkbox"/> | F1  | RGS1 13     | Unknown     |

**Melting Curves**

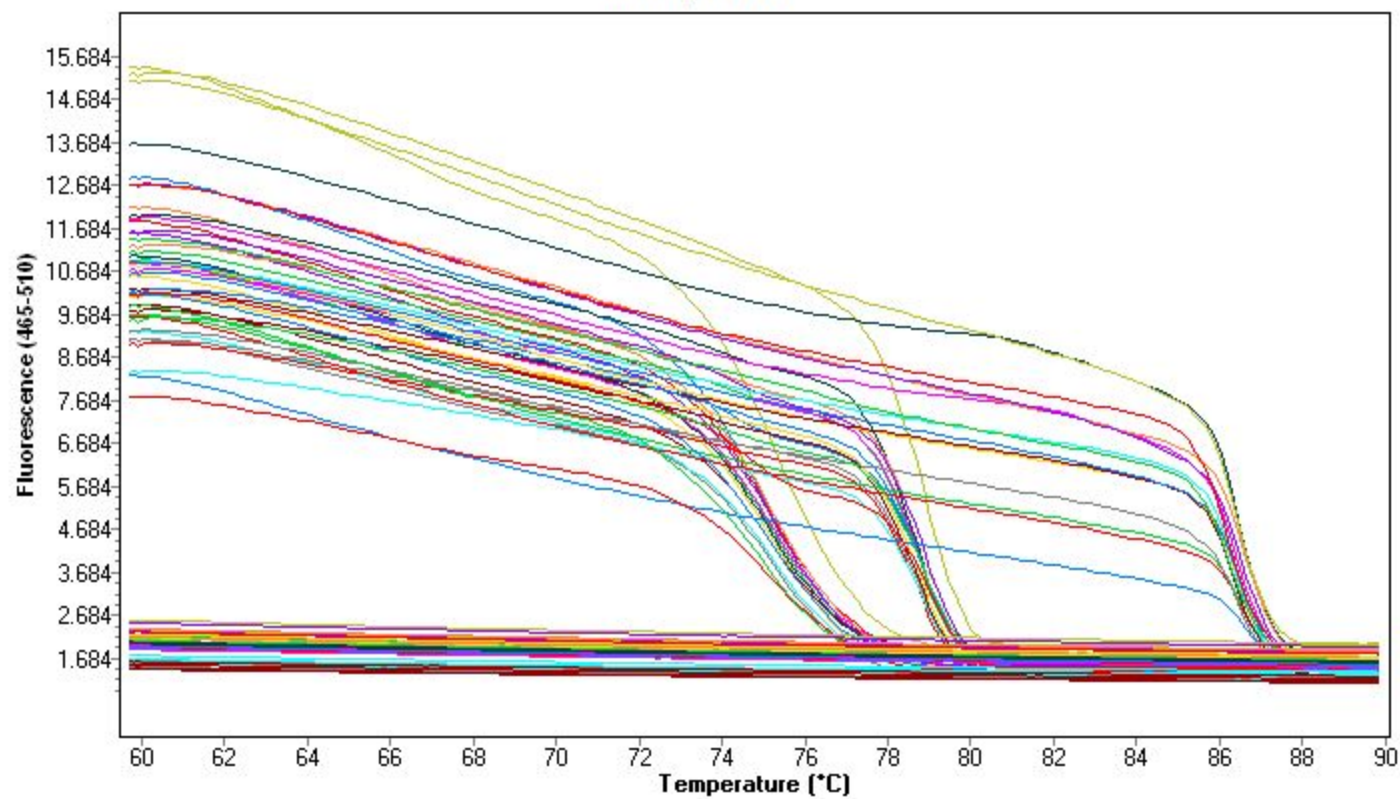

**Normalized Melting Curves**

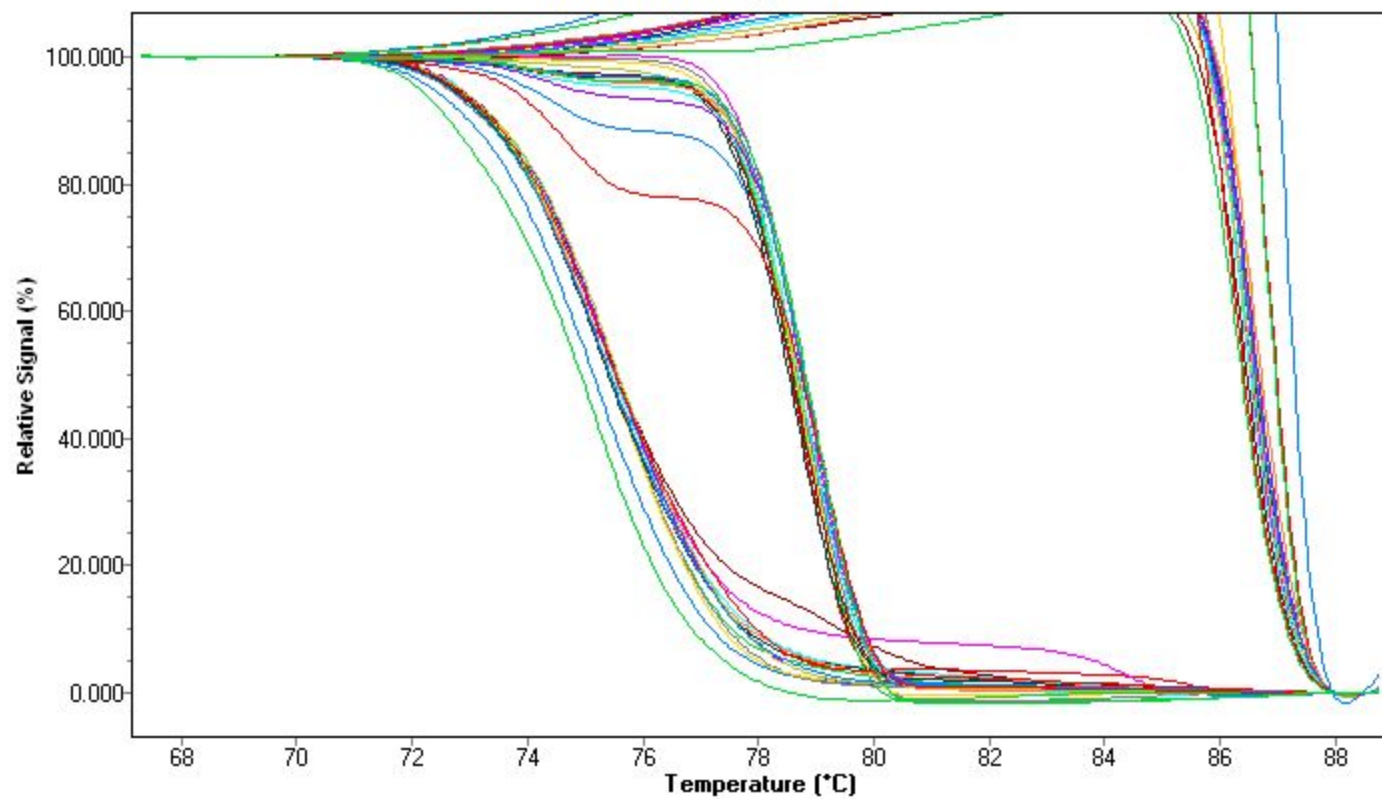

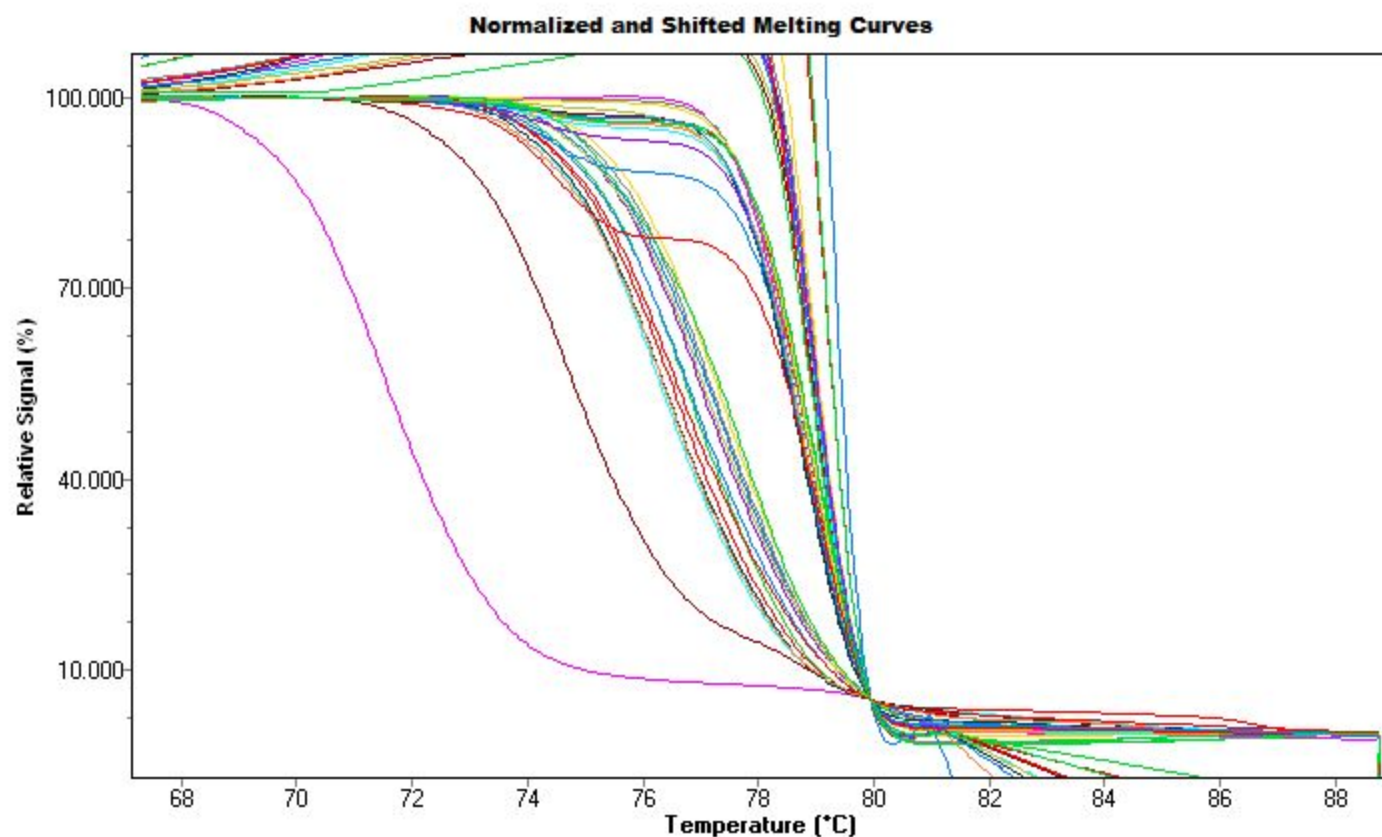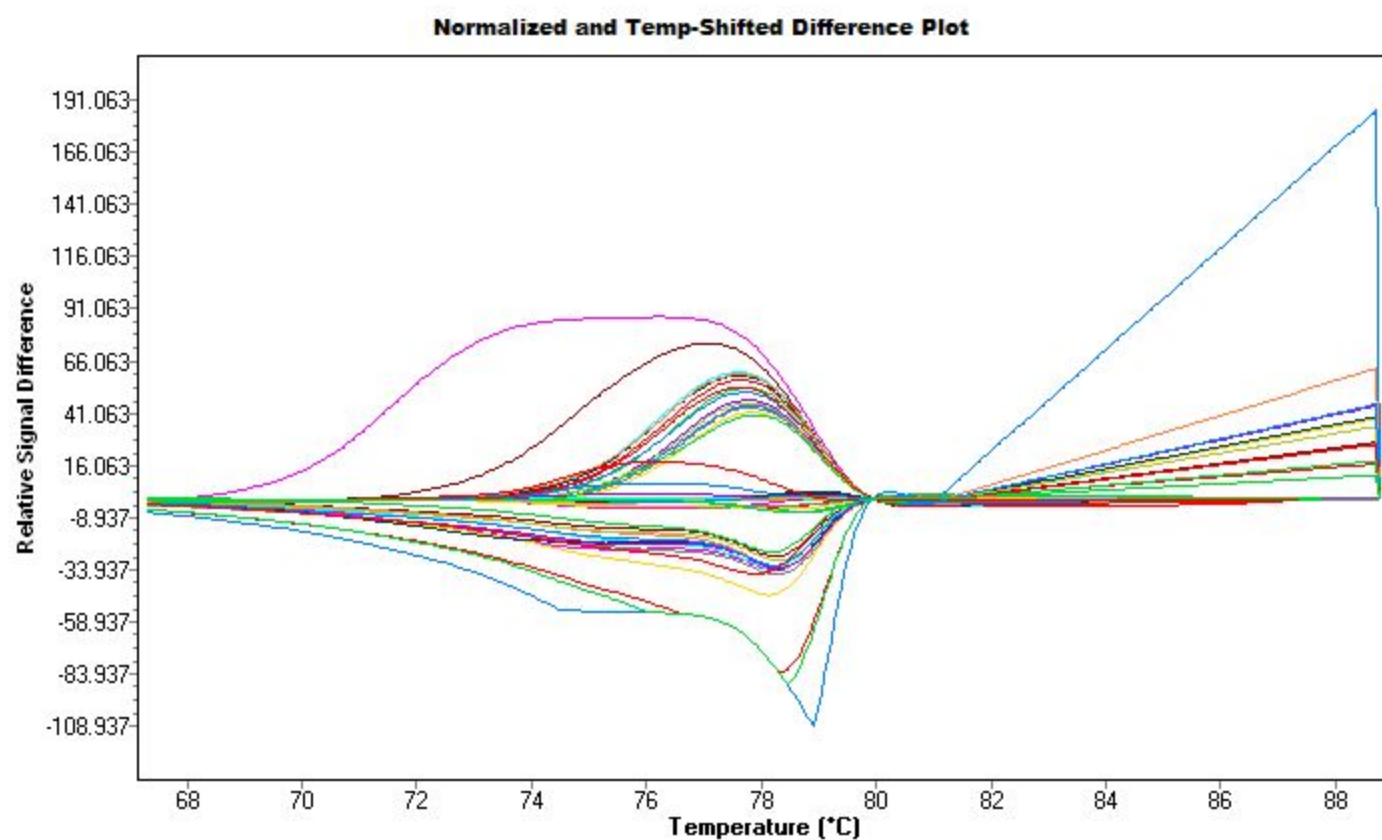

**Analysis Notes**

## Melt Curve Genotyping for All Samples (Melt Curve Genotyping)

|                |            |                    |       |
|----------------|------------|--------------------|-------|
| Channel        | 465-510    | Color Compensation | Off   |
| Program Name   | Program    |                    |       |
| Std's Settings | Auto-Group |                    |       |
| Sensitivity    | Normal     | Temp Range         | 62-86 |
| Score          | 0.7        | Res                | 0.1   |

|             |             |
|-------------|-------------|
| Subset Name | All Samples |
|-------------|-------------|

### Results

| Inc                                 | Pos. | Sample Name | Sample Type | Group | Score | Resolution | Status |
|-------------------------------------|------|-------------|-------------|-------|-------|------------|--------|
| <input checked="" type="checkbox"/> | A1   | GAPDH 9     | Unknown     | 2     | 0.99  | 0.89       |        |
| <input checked="" type="checkbox"/> | A2   | GAPDH 9     | Unknown     | 2     | 0.99  | 0.83       |        |
| <input checked="" type="checkbox"/> | A3   | GAPDH 9     | Unknown     | 2     | 0.99  | 0.83       |        |
| <input checked="" type="checkbox"/> | A4   | GAPDH 10    | Unknown     | 2     | 0.98  | 0.80       |        |
| <input checked="" type="checkbox"/> | A5   | GAPDH 10    | Unknown     | 2     | 0.98  | 0.82       |        |
| <input checked="" type="checkbox"/> | A6   | GAPDH 10    | Unknown     | 2     | 0.98  | 0.84       |        |
| <input checked="" type="checkbox"/> | A7   | GAPDH 11    | Unknown     | 2     | 0.97  | 0.75       |        |
| <input checked="" type="checkbox"/> | A8   | GAPDH 11    | Unknown     | 2     | 0.99  | 0.80       |        |
| <input checked="" type="checkbox"/> | A9   | GAPDH 11    | Unknown     | 2     | 0.99  | 0.83       |        |
| <input checked="" type="checkbox"/> | A10  | GAPDH 12    | Unknown     | 2     | 1.00  | 0.82       |        |
| <input checked="" type="checkbox"/> | A11  | GAPDH 12    | Unknown     | 2     | 0.99  | 0.80       |        |
| <input checked="" type="checkbox"/> | A12  | GAPDH 12    | Unknown     | 2     | 0.99  | 0.78       |        |
| <input checked="" type="checkbox"/> | B1   | FCER1A 9    | Unknown     | 3     | 0.93  | 0.64       |        |
| <input checked="" type="checkbox"/> | B2   | FCER1A 9    | Unknown     | 3     | 0.99  | 0.77       |        |
| <input checked="" type="checkbox"/> | B3   | FCER1A 9    | Unknown     | 3     | 0.99  | 0.76       |        |
| <input checked="" type="checkbox"/> | B4   | FCER1A 10   | Unknown     | 3     | 0.98  | 0.83       |        |
| <input checked="" type="checkbox"/> | B5   | FCER1A 10   | Unknown     | 3     | 0.98  | 0.82       |        |
| <input checked="" type="checkbox"/> | B6   | FCER1A 10   | Unknown     | 3     | 0.99  | 0.77       |        |
| <input checked="" type="checkbox"/> | B7   | FCER1A 11   | Unknown     | 3     | 0.98  | 0.78       |        |
| <input checked="" type="checkbox"/> | B8   | FCER1A 11   | Unknown     | 3     | 0.99  | 0.82       |        |
| <input checked="" type="checkbox"/> | B9   | FCER1A 11   | Unknown     | 3     | 0.99  | 0.76       |        |
| <input checked="" type="checkbox"/> | B10  | FCER1A 12   | Unknown     | 3     | 1.00  | 0.82       |        |
| <input checked="" type="checkbox"/> | B11  | FCER1A 12   | Unknown     | 3     | 0.97  | 0.76       |        |
| <input checked="" type="checkbox"/> | B12  | FCER1A 12   | Unknown     | 3     | 0.99  | 0.81       |        |
| <input checked="" type="checkbox"/> | C1   | RGS1 9      | Unknown     | 1     | 0.90  | 0.84       |        |
| <input checked="" type="checkbox"/> | C2   | RGS1 9      | Unknown     | 1     | 0.95  | 0.90       |        |
| <input checked="" type="checkbox"/> | C3   | RGS1 9      | Unknown     | 1     | 0.95  | 0.89       |        |
| <input checked="" type="checkbox"/> | C4   | RGS1 10     | Unknown     | 1     | 0.98  | 0.91       |        |
| <input checked="" type="checkbox"/> | C5   | RGS1 10     | Unknown     | 1     | 0.99  | 0.92       |        |
| <input checked="" type="checkbox"/> | C6   | RGS1 10     | Unknown     | 1     | 0.98  | 0.88       |        |
| <input checked="" type="checkbox"/> | C7   | RGS1 11     | Unknown     | 1     | 0.99  | 0.91       |        |

## Results

| Inc                                 | Pos. | Sample Name | Sample Type | Group    | Score | Resolution | Status |
|-------------------------------------|------|-------------|-------------|----------|-------|------------|--------|
| <input checked="" type="checkbox"/> | C8   | RGS1 11     | Unknown     | 1        | 0.98  | 0.89       |        |
| <input checked="" type="checkbox"/> | C9   | RGS1 11     | Unknown     | 1        | 0.96  | 0.90       |        |
| <input checked="" type="checkbox"/> | C10  | RGS1 12     | Unknown     | 1        | 0.99  | 0.90       |        |
| <input checked="" type="checkbox"/> | C11  | RGS1 12     | Unknown     | 1        | 0.99  | 0.93       |        |
| <input checked="" type="checkbox"/> | C12  | RGS1 12     | Unknown     | 1        | 0.99  | 0.92       |        |
| <input checked="" type="checkbox"/> | D1   | GAPDH 13    | Unknown     | 2        | 0.99  | 0.82       |        |
| <input checked="" type="checkbox"/> | D2   | GAPDH 13    | Unknown     | 2        | 0.99  | 0.81       |        |
| <input checked="" type="checkbox"/> | D3   | GAPDH 13    | Unknown     | 2        | 0.98  | 0.91       |        |
| <input checked="" type="checkbox"/> | D4   | blank       | Unknown     | Negative | 1.00  | 1.00       |        |
| <input checked="" type="checkbox"/> | D5   | blank       | Unknown     | Negative | 1.00  | 1.00       |        |
| <input checked="" type="checkbox"/> | D6   | blank       | Unknown     | Negative | 1.00  | 1.00       |        |
| <input checked="" type="checkbox"/> | D7   | blank       | Unknown     | Negative | 1.00  | 1.00       |        |
| <input checked="" type="checkbox"/> | D8   | blank       | Unknown     | Negative | 1.00  | 1.00       |        |
| <input checked="" type="checkbox"/> | D9   | blank       | Unknown     | Negative | 1.00  | 1.00       |        |
| <input checked="" type="checkbox"/> | D10  | blank       | Unknown     | Negative | 1.00  | 1.00       |        |
| <input checked="" type="checkbox"/> | D11  | blank       | Unknown     | Negative | 1.00  | 1.00       |        |
| <input checked="" type="checkbox"/> | D12  | blank       | Unknown     | Negative | 1.00  | 1.00       |        |
| <input checked="" type="checkbox"/> | E1   | FCER1A 13   | Unknown     | 3        | 0.99  | 0.80       |        |
| <input checked="" type="checkbox"/> | E2   | FCER1A 13   | Unknown     | Unknown  | 0.66  | 0.20       |        |
| <input checked="" type="checkbox"/> | E3   | FCER1A 13   | Unknown     | 3        | 0.99  | 0.79       |        |
| <input checked="" type="checkbox"/> | E4   | blank       | Unknown     | Negative | 1.00  | 1.00       |        |
| <input checked="" type="checkbox"/> | E5   | blank       | Unknown     | Negative | 1.00  | 1.00       |        |
| <input checked="" type="checkbox"/> | E6   | blank       | Unknown     | Negative | 1.00  | 1.00       |        |
| <input checked="" type="checkbox"/> | E7   | blank       | Unknown     | Negative | 1.00  | 1.00       |        |
| <input checked="" type="checkbox"/> | E8   | blank       | Unknown     | Negative | 1.00  | 1.00       |        |
| <input checked="" type="checkbox"/> | E9   | blank       | Unknown     | Negative | 1.00  | 1.00       |        |
| <input checked="" type="checkbox"/> | E10  | blank       | Unknown     | Negative | 1.00  | 1.00       |        |
| <input checked="" type="checkbox"/> | E11  | blank       | Unknown     | Negative | 1.00  | 1.00       |        |
| <input checked="" type="checkbox"/> | E12  | blank       | Unknown     | Negative | 1.00  | 1.00       |        |
| <input checked="" type="checkbox"/> | F1   | RGS1 13     | Unknown     | 1        | 1.00  | 0.92       |        |
| <input checked="" type="checkbox"/> | F2   | RGS1 13     | Unknown     | 1        | 0.97  | 0.90       |        |
| <input checked="" type="checkbox"/> | F3   | RGS1 13     | Unknown     | 1        | 0.98  | 0.90       |        |
| <input checked="" type="checkbox"/> | F4   | blank       | Unknown     | Negative | 1.00  | 1.00       |        |
| <input checked="" type="checkbox"/> | F5   | blank       | Unknown     | Negative | 1.00  | 1.00       |        |
| <input checked="" type="checkbox"/> | F6   | blank       | Unknown     | Negative | 1.00  | 1.00       |        |
| <input checked="" type="checkbox"/> | F7   | blank       | Unknown     | Negative | 1.00  | 1.00       |        |
| <input checked="" type="checkbox"/> | F8   | blank       | Unknown     | Negative | 1.00  | 1.00       |        |
| <input checked="" type="checkbox"/> | F9   | blank       | Unknown     | Negative | 1.00  | 1.00       |        |

## Results

| Inc                                 | Pos. | Sample Name | Sample Type | Group    | Score | Resolution | Status |
|-------------------------------------|------|-------------|-------------|----------|-------|------------|--------|
| <input checked="" type="checkbox"/> | F10  | blank       | Unknown     | Negative | 1.00  | 1.00       |        |
| <input checked="" type="checkbox"/> | F11  | blank       | Unknown     | Negative | 1.00  | 1.00       |        |
| <input checked="" type="checkbox"/> | F12  | blank       | Unknown     | Negative | 1.00  | 1.00       |        |
| <input checked="" type="checkbox"/> | G1   | blank       | Unknown     | Negative | 1.00  | 1.00       |        |
| <input checked="" type="checkbox"/> | G2   | blank       | Unknown     | Negative | 1.00  | 1.00       |        |
| <input checked="" type="checkbox"/> | G3   | blank       | Unknown     | Negative | 1.00  | 1.00       |        |
| <input checked="" type="checkbox"/> | G4   | blank       | Unknown     | Negative | 1.00  | 1.00       |        |
| <input checked="" type="checkbox"/> | G5   | blank       | Unknown     | Negative | 1.00  | 1.00       |        |
| <input checked="" type="checkbox"/> | G6   | blank       | Unknown     | Negative | 1.00  | 1.00       |        |
| <input checked="" type="checkbox"/> | G7   | blank       | Unknown     | Negative | 1.00  | 1.00       |        |
| <input checked="" type="checkbox"/> | G8   | blank       | Unknown     | Negative | 1.00  | 1.00       |        |
| <input checked="" type="checkbox"/> | G9   | blank       | Unknown     | Negative | 1.00  | 1.00       |        |
| <input checked="" type="checkbox"/> | G10  | blank       | Unknown     | Negative | 1.00  | 1.00       |        |
| <input checked="" type="checkbox"/> | G11  | blank       | Unknown     | Negative | 1.00  | 1.00       |        |
| <input checked="" type="checkbox"/> | G12  | blank       | Unknown     | Negative | 1.00  | 1.00       |        |
| <input checked="" type="checkbox"/> | H1   | blank       | Unknown     | Negative | 1.00  | 1.00       |        |
| <input checked="" type="checkbox"/> | H2   | blank       | Unknown     | Negative | 1.00  | 1.00       |        |
| <input checked="" type="checkbox"/> | H3   | blank       | Unknown     | Negative | 1.00  | 1.00       |        |
| <input checked="" type="checkbox"/> | H4   | blank       | Unknown     | Negative | 1.00  | 1.00       |        |
| <input checked="" type="checkbox"/> | H5   | blank       | Unknown     | Negative | 1.00  | 1.00       |        |
| <input checked="" type="checkbox"/> | H6   | blank       | Unknown     | Negative | 1.00  | 1.00       |        |
| <input checked="" type="checkbox"/> | H7   | blank       | Unknown     | Negative | 1.00  | 1.00       |        |
| <input checked="" type="checkbox"/> | H8   | blank       | Unknown     | Negative | 1.00  | 1.00       |        |
| <input checked="" type="checkbox"/> | H9   | blank       | Unknown     | Negative | 1.00  | 1.00       |        |
| <input checked="" type="checkbox"/> | H10  | blank       | Unknown     | Negative | 1.00  | 1.00       |        |
| <input checked="" type="checkbox"/> | H11  | blank       | Unknown     | Negative | 1.00  | 1.00       |        |
| <input checked="" type="checkbox"/> | H12  | blank       | Unknown     | Negative | 1.00  | 1.00       |        |

## Group 1

| Inc                                 | Pos | Sample Name | Sample Type | Score | Resolution | Status |
|-------------------------------------|-----|-------------|-------------|-------|------------|--------|
| <input checked="" type="checkbox"/> | C1  | RGS1 9      | Unknown     | 0.90  | 0.84       |        |
| <input checked="" type="checkbox"/> | C2  | RGS1 9      | Unknown     | 0.95  | 0.90       |        |
| <input checked="" type="checkbox"/> | C3  | RGS1 9      | Unknown     | 0.95  | 0.89       |        |
| <input checked="" type="checkbox"/> | C4  | RGS1 10     | Unknown     | 0.98  | 0.91       |        |
| <input checked="" type="checkbox"/> | C5  | RGS1 10     | Unknown     | 0.99  | 0.92       |        |
| <input checked="" type="checkbox"/> | C6  | RGS1 10     | Unknown     | 0.98  | 0.88       |        |
| <input checked="" type="checkbox"/> | C7  | RGS1 11     | Unknown     | 0.99  | 0.91       |        |
| <input checked="" type="checkbox"/> | C8  | RGS1 11     | Unknown     | 0.98  | 0.89       |        |



| Group 1                             |     |             |             |       |            |        |
|-------------------------------------|-----|-------------|-------------|-------|------------|--------|
| Inc                                 | Pos | Sample Name | Sample Type | Score | Resolution | Status |
| <input checked="" type="checkbox"/> | C9  | RGS1 11     | Unknown     | 0.96  | 0.90       |        |
| <input checked="" type="checkbox"/> | C10 | RGS1 12     | Unknown     | 0.99  | 0.90       |        |
| <input checked="" type="checkbox"/> | C11 | RGS1 12     | Unknown     | 0.99  | 0.93       |        |
| <input checked="" type="checkbox"/> | C12 | RGS1 12     | Unknown     | 0.99  | 0.92       |        |
| <input checked="" type="checkbox"/> | F1  | RGS1 13     | Unknown     | 1.00  | 0.92       |        |
| <input checked="" type="checkbox"/> | F2  | RGS1 13     | Unknown     | 0.97  | 0.90       |        |
| <input checked="" type="checkbox"/> | F3  | RGS1 13     | Unknown     | 0.98  | 0.90       |        |

| Group 2                             |     |             |             |       |            |        |
|-------------------------------------|-----|-------------|-------------|-------|------------|--------|
| Inc                                 | Pos | Sample Name | Sample Type | Score | Resolution | Status |
| <input checked="" type="checkbox"/> | A1  | GAPDH 9     | Unknown     | 0.99  | 0.89       |        |
| <input checked="" type="checkbox"/> | A2  | GAPDH 9     | Unknown     | 0.99  | 0.83       |        |
| <input checked="" type="checkbox"/> | A3  | GAPDH 9     | Unknown     | 0.99  | 0.83       |        |
| <input checked="" type="checkbox"/> | A4  | GAPDH 10    | Unknown     | 0.98  | 0.80       |        |
| <input checked="" type="checkbox"/> | A5  | GAPDH 10    | Unknown     | 0.98  | 0.82       |        |
| <input checked="" type="checkbox"/> | A6  | GAPDH 10    | Unknown     | 0.98  | 0.84       |        |
| <input checked="" type="checkbox"/> | A7  | GAPDH 11    | Unknown     | 0.97  | 0.75       |        |
| <input checked="" type="checkbox"/> | A8  | GAPDH 11    | Unknown     | 0.99  | 0.80       |        |
| <input checked="" type="checkbox"/> | A9  | GAPDH 11    | Unknown     | 0.99  | 0.83       |        |
| <input checked="" type="checkbox"/> | A10 | GAPDH 12    | Unknown     | 1.00  | 0.82       |        |
| <input checked="" type="checkbox"/> | A11 | GAPDH 12    | Unknown     | 0.99  | 0.80       |        |
| <input checked="" type="checkbox"/> | A12 | GAPDH 12    | Unknown     | 0.99  | 0.78       |        |
| <input checked="" type="checkbox"/> | D1  | GAPDH 13    | Unknown     | 0.99  | 0.82       |        |
| <input checked="" type="checkbox"/> | D2  | GAPDH 13    | Unknown     | 0.99  | 0.81       |        |
| <input checked="" type="checkbox"/> | D3  | GAPDH 13    | Unknown     | 0.98  | 0.91       |        |

| Group 3                             |     |             |             |       |            |        |
|-------------------------------------|-----|-------------|-------------|-------|------------|--------|
| Inc                                 | Pos | Sample Name | Sample Type | Score | Resolution | Status |
| <input checked="" type="checkbox"/> | B1  | FCER1A 9    | Unknown     | 0.93  | 0.64       |        |
| <input checked="" type="checkbox"/> | B2  | FCER1A 9    | Unknown     | 0.99  | 0.77       |        |
| <input checked="" type="checkbox"/> | B3  | FCER1A 9    | Unknown     | 0.99  | 0.76       |        |
| <input checked="" type="checkbox"/> | B4  | FCER1A 10   | Unknown     | 0.98  | 0.83       |        |
| <input checked="" type="checkbox"/> | B5  | FCER1A 10   | Unknown     | 0.98  | 0.82       |        |
| <input checked="" type="checkbox"/> | B6  | FCER1A 10   | Unknown     | 0.99  | 0.77       |        |
| <input checked="" type="checkbox"/> | B7  | FCER1A 11   | Unknown     | 0.98  | 0.78       |        |
| <input checked="" type="checkbox"/> | B8  | FCER1A 11   | Unknown     | 0.99  | 0.82       |        |
| <input checked="" type="checkbox"/> | B9  | FCER1A 11   | Unknown     | 0.99  | 0.76       |        |
| <input checked="" type="checkbox"/> | B10 | FCER1A 12   | Unknown     | 1.00  | 0.82       |        |

**Group** 3

| Inc                                 | Pos | Sample Name | Sample Type | Score | Resolution | Status |
|-------------------------------------|-----|-------------|-------------|-------|------------|--------|
| <input checked="" type="checkbox"/> | B11 | FCER1A 12   | Unknown     | 0.97  | 0.76       |        |
| <input checked="" type="checkbox"/> | B12 | FCER1A 12   | Unknown     | 0.99  | 0.81       |        |
| <input checked="" type="checkbox"/> | E1  | FCER1A 13   | Unknown     | 0.99  | 0.80       |        |
| <input checked="" type="checkbox"/> | E3  | FCER1A 13   | Unknown     | 0.99  | 0.79       |        |

**Group** Negative

| Inc                                 | Pos | Sample Name | Sample Type | Score | Resolution | Status |
|-------------------------------------|-----|-------------|-------------|-------|------------|--------|
| <input checked="" type="checkbox"/> | D4  | blank       | Unknown     | 1.00  | 1.00       |        |
| <input checked="" type="checkbox"/> | D5  | blank       | Unknown     | 1.00  | 1.00       |        |
| <input checked="" type="checkbox"/> | D6  | blank       | Unknown     | 1.00  | 1.00       |        |
| <input checked="" type="checkbox"/> | D7  | blank       | Unknown     | 1.00  | 1.00       |        |
| <input checked="" type="checkbox"/> | D8  | blank       | Unknown     | 1.00  | 1.00       |        |
| <input checked="" type="checkbox"/> | D9  | blank       | Unknown     | 1.00  | 1.00       |        |
| <input checked="" type="checkbox"/> | D10 | blank       | Unknown     | 1.00  | 1.00       |        |
| <input checked="" type="checkbox"/> | D11 | blank       | Unknown     | 1.00  | 1.00       |        |
| <input checked="" type="checkbox"/> | D12 | blank       | Unknown     | 1.00  | 1.00       |        |
| <input checked="" type="checkbox"/> | E4  | blank       | Unknown     | 1.00  | 1.00       |        |
| <input checked="" type="checkbox"/> | E5  | blank       | Unknown     | 1.00  | 1.00       |        |
| <input checked="" type="checkbox"/> | E6  | blank       | Unknown     | 1.00  | 1.00       |        |
| <input checked="" type="checkbox"/> | E7  | blank       | Unknown     | 1.00  | 1.00       |        |
| <input checked="" type="checkbox"/> | E8  | blank       | Unknown     | 1.00  | 1.00       |        |
| <input checked="" type="checkbox"/> | E9  | blank       | Unknown     | 1.00  | 1.00       |        |
| <input checked="" type="checkbox"/> | E10 | blank       | Unknown     | 1.00  | 1.00       |        |
| <input checked="" type="checkbox"/> | E11 | blank       | Unknown     | 1.00  | 1.00       |        |
| <input checked="" type="checkbox"/> | E12 | blank       | Unknown     | 1.00  | 1.00       |        |
| <input checked="" type="checkbox"/> | F4  | blank       | Unknown     | 1.00  | 1.00       |        |
| <input checked="" type="checkbox"/> | F5  | blank       | Unknown     | 1.00  | 1.00       |        |
| <input checked="" type="checkbox"/> | F6  | blank       | Unknown     | 1.00  | 1.00       |        |
| <input checked="" type="checkbox"/> | F7  | blank       | Unknown     | 1.00  | 1.00       |        |
| <input checked="" type="checkbox"/> | F8  | blank       | Unknown     | 1.00  | 1.00       |        |
| <input checked="" type="checkbox"/> | F9  | blank       | Unknown     | 1.00  | 1.00       |        |
| <input checked="" type="checkbox"/> | F10 | blank       | Unknown     | 1.00  | 1.00       |        |
| <input checked="" type="checkbox"/> | F11 | blank       | Unknown     | 1.00  | 1.00       |        |
| <input checked="" type="checkbox"/> | F12 | blank       | Unknown     | 1.00  | 1.00       |        |
| <input checked="" type="checkbox"/> | G1  | blank       | Unknown     | 1.00  | 1.00       |        |
| <input checked="" type="checkbox"/> | G2  | blank       | Unknown     | 1.00  | 1.00       |        |
| <input checked="" type="checkbox"/> | G3  | blank       | Unknown     | 1.00  | 1.00       |        |
| <input checked="" type="checkbox"/> | G4  | blank       | Unknown     | 1.00  | 1.00       |        |

| Group                               |     | Negative    |             |       |            |        |
|-------------------------------------|-----|-------------|-------------|-------|------------|--------|
| Inc                                 | Pos | Sample Name | Sample Type | Score | Resolution | Status |
| <input checked="" type="checkbox"/> | G5  | blank       | Unknown     | 1.00  | 1.00       |        |
| <input checked="" type="checkbox"/> | G6  | blank       | Unknown     | 1.00  | 1.00       |        |
| <input checked="" type="checkbox"/> | G7  | blank       | Unknown     | 1.00  | 1.00       |        |
| <input checked="" type="checkbox"/> | G8  | blank       | Unknown     | 1.00  | 1.00       |        |
| <input checked="" type="checkbox"/> | G9  | blank       | Unknown     | 1.00  | 1.00       |        |
| <input checked="" type="checkbox"/> | G10 | blank       | Unknown     | 1.00  | 1.00       |        |
| <input checked="" type="checkbox"/> | G11 | blank       | Unknown     | 1.00  | 1.00       |        |
| <input checked="" type="checkbox"/> | G12 | blank       | Unknown     | 1.00  | 1.00       |        |
| <input checked="" type="checkbox"/> | H1  | blank       | Unknown     | 1.00  | 1.00       |        |
| <input checked="" type="checkbox"/> | H2  | blank       | Unknown     | 1.00  | 1.00       |        |
| <input checked="" type="checkbox"/> | H3  | blank       | Unknown     | 1.00  | 1.00       |        |
| <input checked="" type="checkbox"/> | H4  | blank       | Unknown     | 1.00  | 1.00       |        |
| <input checked="" type="checkbox"/> | H5  | blank       | Unknown     | 1.00  | 1.00       |        |
| <input checked="" type="checkbox"/> | H6  | blank       | Unknown     | 1.00  | 1.00       |        |
| <input checked="" type="checkbox"/> | H7  | blank       | Unknown     | 1.00  | 1.00       |        |
| <input checked="" type="checkbox"/> | H8  | blank       | Unknown     | 1.00  | 1.00       |        |
| <input checked="" type="checkbox"/> | H9  | blank       | Unknown     | 1.00  | 1.00       |        |
| <input checked="" type="checkbox"/> | H10 | blank       | Unknown     | 1.00  | 1.00       |        |
| <input checked="" type="checkbox"/> | H11 | blank       | Unknown     | 1.00  | 1.00       |        |
| <input checked="" type="checkbox"/> | H12 | blank       | Unknown     | 1.00  | 1.00       |        |

| Group                               |     | Unknown     |             |       |            |        |
|-------------------------------------|-----|-------------|-------------|-------|------------|--------|
| Inc                                 | Pos | Sample Name | Sample Type | Score | Resolution | Status |
| <input checked="" type="checkbox"/> | E2  | FCER1A 13   | Unknown     | 0.66  | 0.20       |        |

### Melting Curves

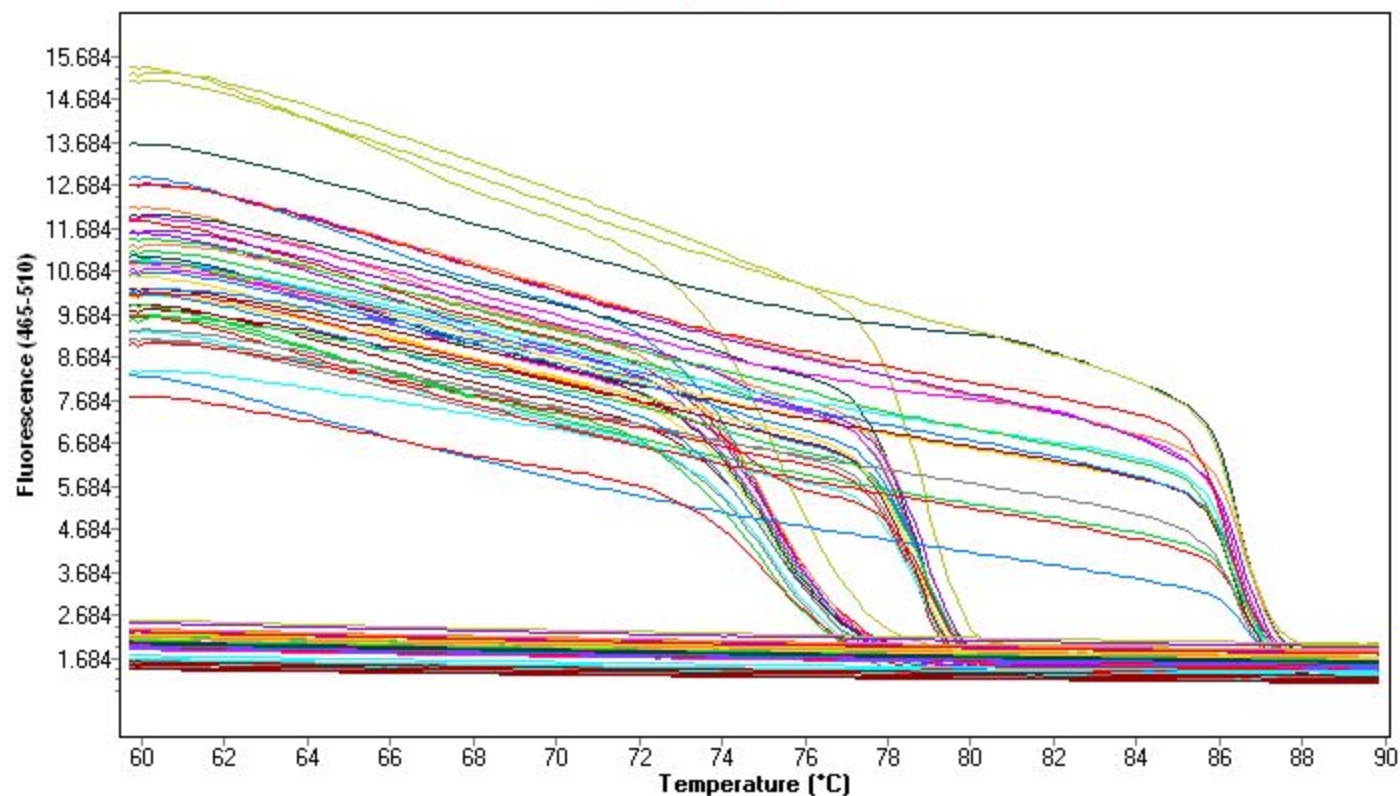

### Melting Peaks

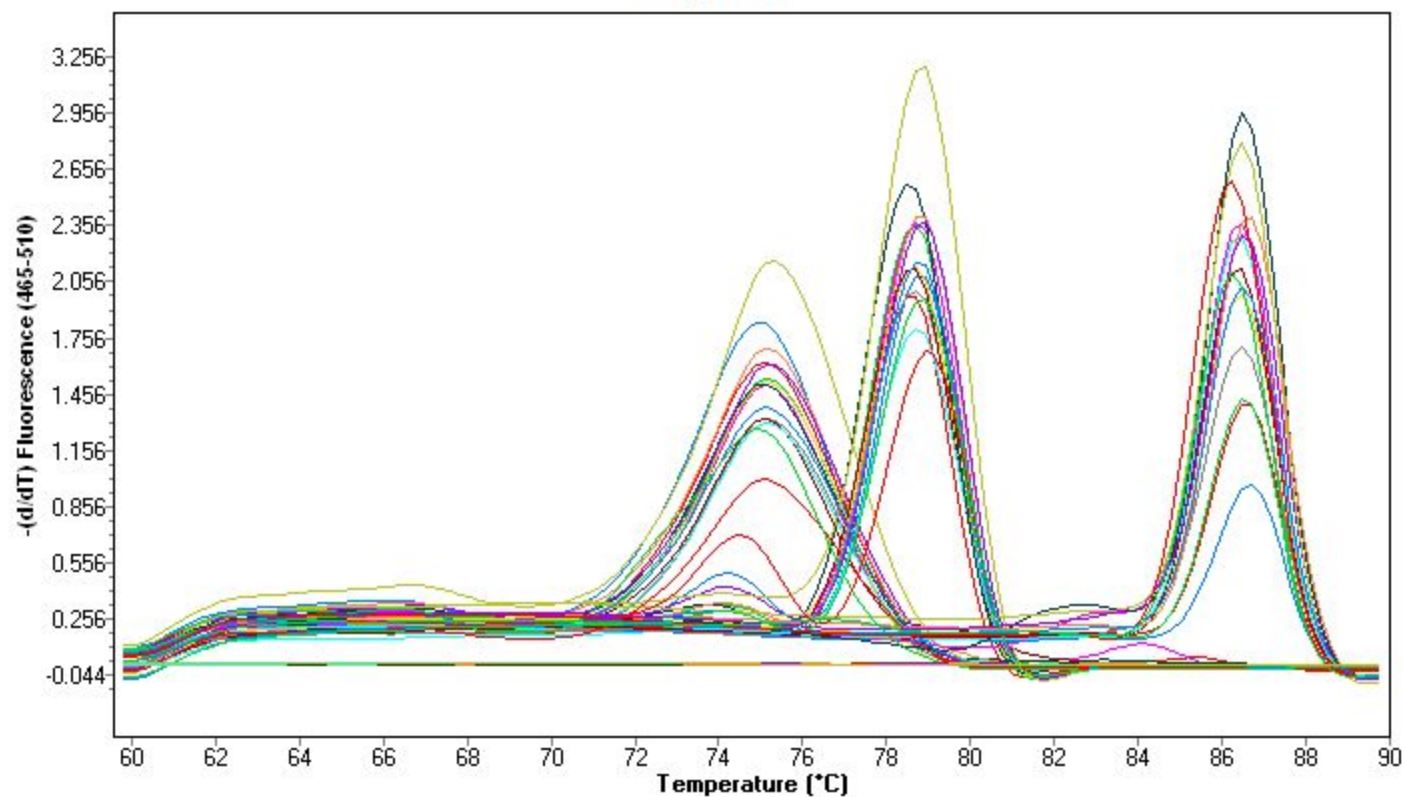

### Analysis Notes

## Tm Calling for All Samples (Tm Calling)

### Settings

|                |             |                    |          |
|----------------|-------------|--------------------|----------|
| Channel        | 465-510     | Color Compensation | Off      |
| Program        | Program     |                    |          |
| Show Shoulders | False       | Chemistry          | HybProbe |
|                |             | Max Peaks          | 2        |
| Subset Name    | All Samples |                    |          |

### Results

| Inc                                 | Pos | Sample Name | Peak 1 |      |       |        | Peak 2 |      |       |        | Status |
|-------------------------------------|-----|-------------|--------|------|-------|--------|--------|------|-------|--------|--------|
|                                     |     |             | Tm     | Area | Width | Height | Tm     | Area | Width | Height |        |
| <input checked="" type="checkbox"/> | A1  | GAPDH 9     | 75.17  | 7.40 | 3.94  | 1.88   |        |      |       |        |        |
| <input checked="" type="checkbox"/> | A2  | GAPDH 9     | 75.39  | 6.52 | 3.97  | 1.65   |        |      |       |        |        |
| <input checked="" type="checkbox"/> | A3  | GAPDH 9     | 75.37  | 5.87 | 3.80  | 1.54   |        |      |       |        |        |
| <input checked="" type="checkbox"/> | A4  | GAPDH 10    | 75.36  | 5.69 | 3.81  | 1.49   |        |      |       |        |        |
| <input checked="" type="checkbox"/> | A5  | GAPDH 10    | 75.43  | 5.27 | 3.90  | 1.35   |        |      |       |        |        |
| <input checked="" type="checkbox"/> | A6  | GAPDH 10    | 75.41  | 5.96 | 3.82  | 1.56   |        |      |       |        |        |
| <input checked="" type="checkbox"/> | A7  | GAPDH 11    | 75.35  | 5.08 | 4.03  | 1.26   |        |      |       |        |        |
| <input checked="" type="checkbox"/> | A8  | GAPDH 11    | 75.41  | 5.03 | 3.91  | 1.29   |        |      |       |        |        |
| <input checked="" type="checkbox"/> | A9  | GAPDH 11    | 75.32  | 5.97 | 3.99  | 1.50   |        |      |       |        |        |
| <input checked="" type="checkbox"/> | A10 | GAPDH 12    | 75.39  | 6.83 | 4.04  | 1.69   |        |      |       |        |        |
| <input checked="" type="checkbox"/> | A11 | GAPDH 12    | 75.52  | 6.60 | 4.06  | 1.63   |        |      |       |        |        |
| <input checked="" type="checkbox"/> | A12 | GAPDH 12    | 75.58  | 8.89 | 4.05  | 2.19   |        |      |       |        |        |
| <input checked="" type="checkbox"/> | B1  | FCER1A 9    | 74.05  | 0.65 | 2.03  | 0.32   | 78.83  | 5.19 | 2.38  | 2.18   |        |
| <input checked="" type="checkbox"/> | B2  | FCER1A 9    | 78.60  | 4.73 | 2.30  | 2.05   |        |      |       |        |        |
| <input checked="" type="checkbox"/> | B3  | FCER1A 9    | 78.69  | 5.81 | 2.37  | 2.45   |        |      |       |        |        |
| <input checked="" type="checkbox"/> | B4  | FCER1A 10   | 78.76  | 5.90 | 2.41  | 2.45   |        |      |       |        |        |
| <input checked="" type="checkbox"/> | B5  | FCER1A 10   | 78.70  | 5.12 | 2.45  | 2.09   |        |      |       |        |        |
| <input checked="" type="checkbox"/> | B6  | FCER1A 10   | 78.67  | 5.32 | 2.40  | 2.21   |        |      |       |        |        |
| <input checked="" type="checkbox"/> | B7  | FCER1A 11   | 78.62  | 5.38 | 2.45  | 2.19   |        |      |       |        |        |
| <input checked="" type="checkbox"/> | B8  | FCER1A 11   | 78.73  | 4.52 | 2.42  | 1.87   |        |      |       |        |        |
| <input checked="" type="checkbox"/> | B9  | FCER1A 11   | 78.55  | 6.43 | 2.41  | 2.67   |        |      |       |        |        |
| <input checked="" type="checkbox"/> | B10 | FCER1A 12   | 78.82  | 6.19 | 2.47  | 2.51   |        |      |       |        |        |
| <input checked="" type="checkbox"/> | B11 | FCER1A 12   | 78.88  | 5.92 | 2.39  | 2.47   |        |      |       |        |        |
| <input checked="" type="checkbox"/> | B12 | FCER1A 12   | 78.84  | 8.40 | 2.53  | 3.33   |        |      |       |        |        |
| <input checked="" type="checkbox"/> | C1  | RGS1 9      | 68.32  | 0.63 | 5.00  | 0.13   | 86.64  | 2.43 | 3.22  | 0.76   |        |
| <input checked="" type="checkbox"/> | C2  | RGS1 9      | 86.72  | 3.69 | 2.50  | 1.48   |        |      |       |        |        |
| <input checked="" type="checkbox"/> | C3  | RGS1 9      | 86.72  | 3.72 | 2.52  | 1.48   |        |      |       |        |        |
| <input checked="" type="checkbox"/> | C4  | RGS1 10     | 86.44  | 5.75 | 2.25  | 2.56   |        |      |       |        |        |
| <input checked="" type="checkbox"/> | C5  | RGS1 10     | 86.55  | 4.37 | 2.42  | 1.80   |        |      |       |        |        |

## Results

| Inc                                 | Pos | Sample Name | Peak 1 |      |       |        | Peak 2 |      |       |        | Status |
|-------------------------------------|-----|-------------|--------|------|-------|--------|--------|------|-------|--------|--------|
|                                     |     |             | Tm     | Area | Width | Height | Tm     | Area | Width | Height |        |
| <input checked="" type="checkbox"/> | C6  | RGS1 10     | 86.53  | 4.97 | 2.38  | 2.09   |        |      |       |        |        |
| <input checked="" type="checkbox"/> | C7  | RGS1 11     | 86.28  | 4.29 | 2.16  | 1.99   |        |      |       |        |        |
| <input checked="" type="checkbox"/> | C8  | RGS1 11     | 86.46  | 5.11 | 2.20  | 2.32   |        |      |       |        |        |
| <input checked="" type="checkbox"/> | C9  | RGS1 11     | 86.58  | 7.53 | 2.42  | 3.11   |        |      |       |        |        |
| <input checked="" type="checkbox"/> | C10 | RGS1 12     | 86.72  | 5.67 | 2.26  | 2.51   |        |      |       |        |        |
| <input checked="" type="checkbox"/> | C11 | RGS1 12     | 86.63  | 6.05 | 2.48  | 2.44   |        |      |       |        |        |
| <input checked="" type="checkbox"/> | C12 | RGS1 12     | 86.57  | 6.92 | 2.36  | 2.93   |        |      |       |        |        |
| <input checked="" type="checkbox"/> | D1  | GAPDH 13    | 75.44  | 5.77 | 4.14  | 1.39   |        |      |       |        |        |
| <input checked="" type="checkbox"/> | D2  | GAPDH 13    | 75.49  | 4.22 | 4.19  | 1.01   |        |      |       |        |        |
| <input checked="" type="checkbox"/> | D3  | GAPDH 13    | 74.86  | 5.71 | 4.44  | 1.29   |        |      |       |        |        |
| <input checked="" type="checkbox"/> | D4  | blank       |        |      |       |        |        |      |       |        |        |
| <input checked="" type="checkbox"/> | D5  | blank       |        |      |       |        |        |      |       |        |        |
| <input checked="" type="checkbox"/> | D6  | blank       |        |      |       |        |        |      |       |        |        |
| <input checked="" type="checkbox"/> | D7  | blank       |        |      |       |        |        |      |       |        |        |
| <input checked="" type="checkbox"/> | D8  | blank       |        |      |       |        |        |      |       |        |        |
| <input checked="" type="checkbox"/> | D9  | blank       |        |      |       |        |        |      |       |        |        |
| <input checked="" type="checkbox"/> | D10 | blank       |        |      |       |        |        |      |       |        |        |
| <input checked="" type="checkbox"/> | D11 | blank       |        |      |       |        |        |      |       |        |        |
| <input checked="" type="checkbox"/> | D12 | blank       |        |      |       |        |        |      |       |        |        |
| <input checked="" type="checkbox"/> | E1  | FCER1A 13   | 78.77  | 5.58 | 2.47  | 2.26   |        |      |       |        |        |
| <input checked="" type="checkbox"/> | E2  | FCER1A 13   | 74.39  | 1.20 | 2.20  | 0.55   | 79.03  | 4.14 | 2.35  | 1.76   |        |
| <input checked="" type="checkbox"/> | E3  | FCER1A 13   | 78.85  | 5.00 | 2.45  | 2.04   |        |      |       |        |        |
| <input checked="" type="checkbox"/> | E4  | blank       |        |      |       |        |        |      |       |        |        |
| <input checked="" type="checkbox"/> | E5  | blank       |        |      |       |        |        |      |       |        |        |
| <input checked="" type="checkbox"/> | E6  | blank       |        |      |       |        |        |      |       |        |        |
| <input checked="" type="checkbox"/> | E7  | blank       |        |      |       |        |        |      |       |        |        |
| <input checked="" type="checkbox"/> | E8  | blank       |        |      |       |        |        |      |       |        |        |
| <input checked="" type="checkbox"/> | E9  | blank       |        |      |       |        |        |      |       |        |        |
| <input checked="" type="checkbox"/> | E10 | blank       |        |      |       |        |        |      |       |        |        |
| <input checked="" type="checkbox"/> | E11 | blank       |        |      |       |        |        |      |       |        |        |
| <input checked="" type="checkbox"/> | E12 | blank       |        |      |       |        |        |      |       |        |        |
| <input checked="" type="checkbox"/> | F1  | RGS1 13     | 86.59  | 5.06 | 2.39  | 2.12   |        |      |       |        |        |
| <input checked="" type="checkbox"/> | F2  | RGS1 13     | 86.28  | 6.18 | 2.25  | 2.75   |        |      |       |        |        |
| <input checked="" type="checkbox"/> | F3  | RGS1 13     | 86.36  | 5.02 | 2.32  | 2.17   |        |      |       |        |        |
| <input checked="" type="checkbox"/> | F4  | blank       |        |      |       |        |        |      |       |        |        |
| <input checked="" type="checkbox"/> | F5  | blank       |        |      |       |        |        |      |       |        |        |

## Results

| Inc                                 | Pos | Sample Name | Peak 1 |      |       |        | Peak 2 |      |       |        | Status |
|-------------------------------------|-----|-------------|--------|------|-------|--------|--------|------|-------|--------|--------|
|                                     |     |             | Tm     | Area | Width | Height | Tm     | Area | Width | Height |        |
| <input checked="" type="checkbox"/> | F6  | blank       |        |      |       |        |        |      |       |        |        |
| <input checked="" type="checkbox"/> | F7  | blank       |        |      |       |        |        |      |       |        |        |
| <input checked="" type="checkbox"/> | F8  | blank       |        |      |       |        |        |      |       |        |        |
| <input checked="" type="checkbox"/> | F9  | blank       |        |      |       |        |        |      |       |        |        |
| <input checked="" type="checkbox"/> | F10 | blank       |        |      |       |        |        |      |       |        |        |
| <input checked="" type="checkbox"/> | F11 | blank       |        |      |       |        |        |      |       |        |        |
| <input checked="" type="checkbox"/> | F12 | blank       |        |      |       |        |        |      |       |        |        |
| <input checked="" type="checkbox"/> | G1  | blank       |        |      |       |        |        |      |       |        |        |
| <input checked="" type="checkbox"/> | G2  | blank       |        |      |       |        |        |      |       |        |        |
| <input checked="" type="checkbox"/> | G3  | blank       |        |      |       |        |        |      |       |        |        |
| <input checked="" type="checkbox"/> | G4  | blank       |        |      |       |        |        |      |       |        |        |
| <input checked="" type="checkbox"/> | G5  | blank       |        |      |       |        |        |      |       |        |        |
| <input checked="" type="checkbox"/> | G6  | blank       |        |      |       |        |        |      |       |        |        |
| <input checked="" type="checkbox"/> | G7  | blank       |        |      |       |        |        |      |       |        |        |
| <input checked="" type="checkbox"/> | G8  | blank       |        |      |       |        |        |      |       |        |        |
| <input checked="" type="checkbox"/> | G9  | blank       |        |      |       |        |        |      |       |        |        |
| <input checked="" type="checkbox"/> | G10 | blank       |        |      |       |        |        |      |       |        |        |
| <input checked="" type="checkbox"/> | G11 | blank       |        |      |       |        |        |      |       |        |        |
| <input checked="" type="checkbox"/> | G12 | blank       |        |      |       |        |        |      |       |        |        |
| <input checked="" type="checkbox"/> | H1  | blank       |        |      |       |        |        |      |       |        |        |
| <input checked="" type="checkbox"/> | H2  | blank       |        |      |       |        |        |      |       |        |        |
| <input checked="" type="checkbox"/> | H3  | blank       |        |      |       |        |        |      |       |        |        |
| <input checked="" type="checkbox"/> | H4  | blank       |        |      |       |        |        |      |       |        |        |
| <input checked="" type="checkbox"/> | H5  | blank       |        |      |       |        |        |      |       |        |        |
| <input checked="" type="checkbox"/> | H6  | blank       |        |      |       |        |        |      |       |        |        |
| <input checked="" type="checkbox"/> | H7  | blank       |        |      |       |        |        |      |       |        |        |
| <input checked="" type="checkbox"/> | H8  | blank       |        |      |       |        |        |      |       |        |        |
| <input checked="" type="checkbox"/> | H9  | blank       |        |      |       |        |        |      |       |        |        |
| <input checked="" type="checkbox"/> | H10 | blank       |        |      |       |        |        |      |       |        |        |
| <input checked="" type="checkbox"/> | H11 | blank       |        |      |       |        |        |      |       |        |        |
| <input checked="" type="checkbox"/> | H12 | blank       |        |      |       |        |        |      |       |        |        |

### Melting Curves

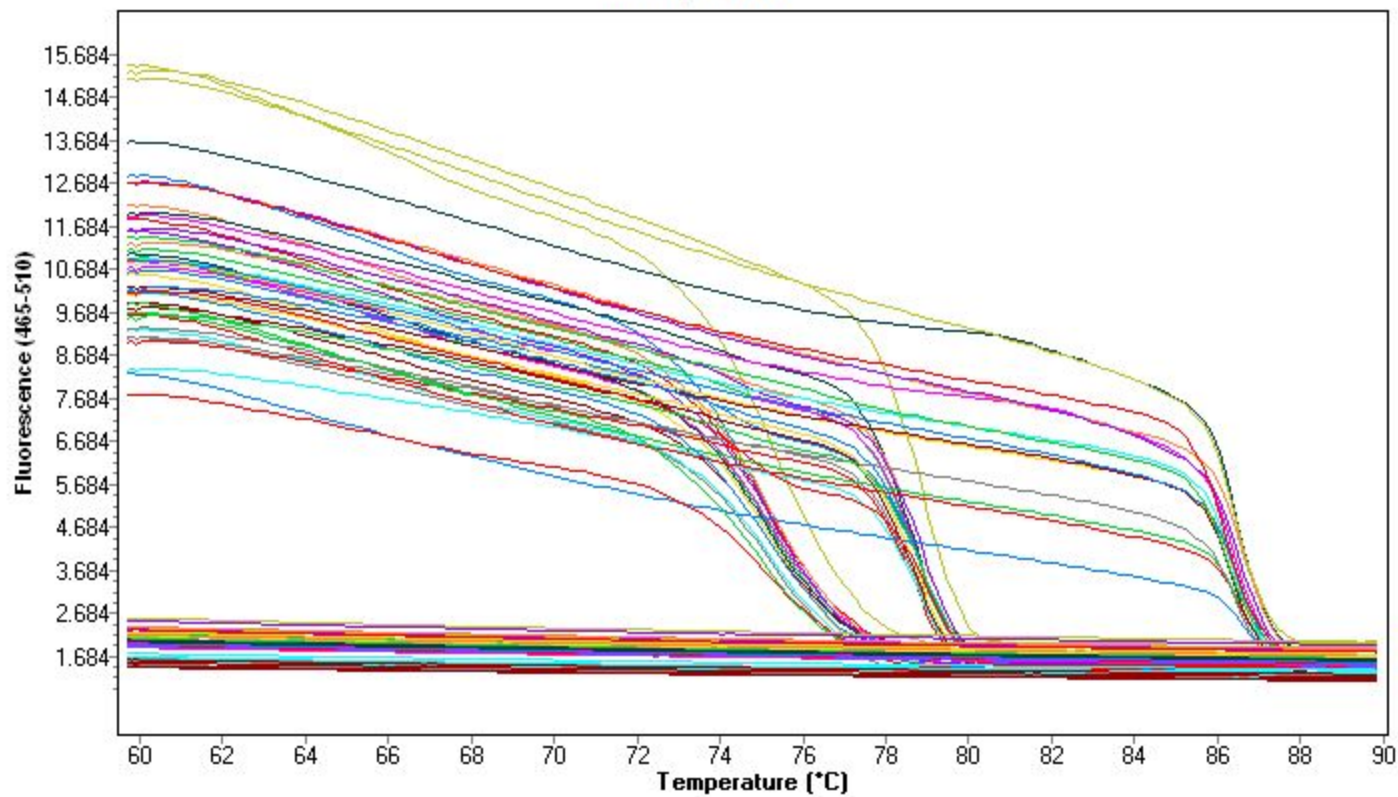

### Melting Peaks

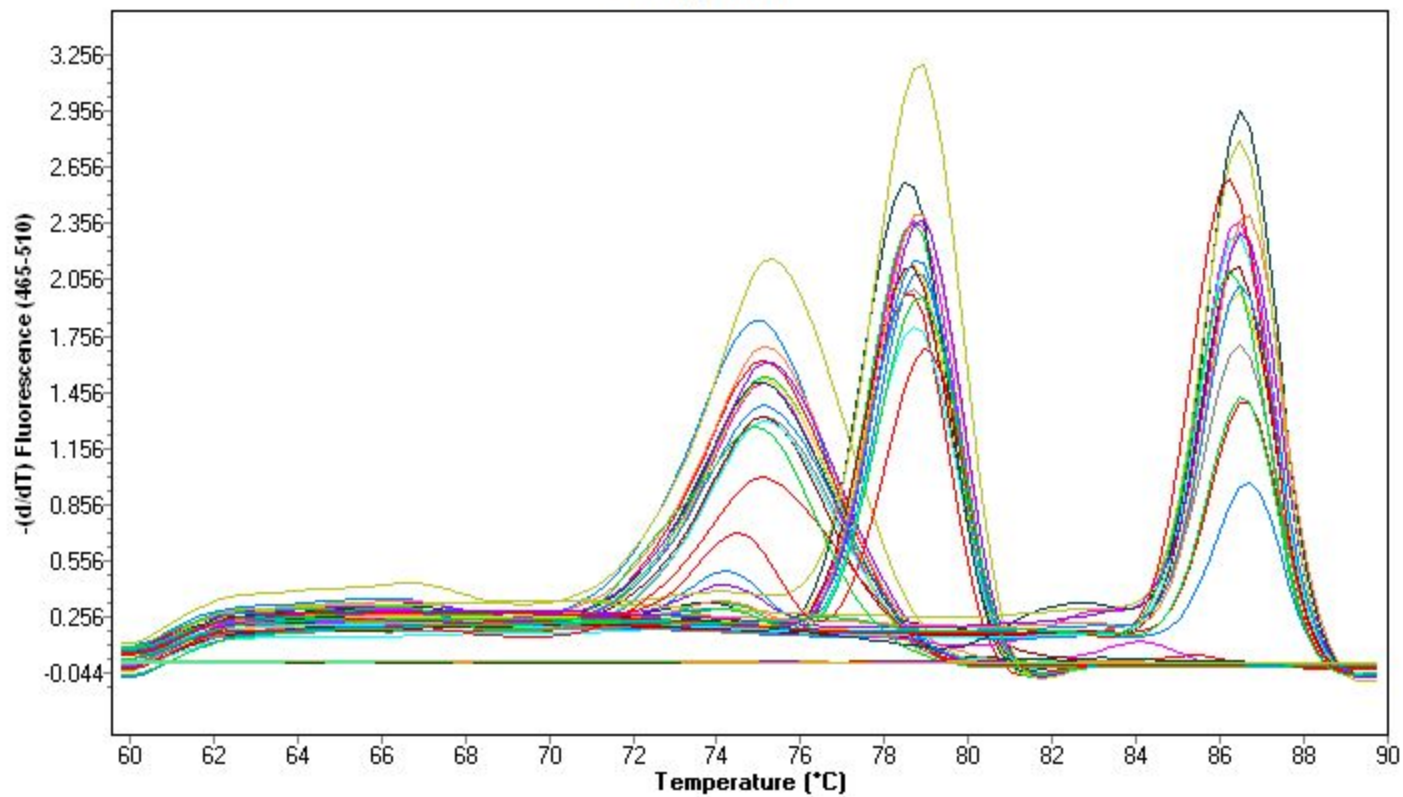

### Analysis Notes



## Tm Calling for All Samples (1) (Tm Calling)

### Settings

|                |             |                    |          |
|----------------|-------------|--------------------|----------|
| Channel        | 465-510     | Color Compensation | Off      |
| Program        | Program     |                    |          |
| Show Shoulders | False       | Chemistry          | HybProbe |
|                |             | Max Peaks          | 2        |
| Subset Name    | All Samples |                    |          |

### Results

| Inc                                 | Pos | Sample Name | Peak 1 |      |       |        | Peak 2 |      |       |        | Status |
|-------------------------------------|-----|-------------|--------|------|-------|--------|--------|------|-------|--------|--------|
|                                     |     |             | Tm     | Area | Width | Height | Tm     | Area | Width | Height |        |
| <input checked="" type="checkbox"/> | A1  | GAPDH 9     |        |      |       |        |        |      |       |        |        |
| <input checked="" type="checkbox"/> | A2  | GAPDH 9     |        |      |       |        |        |      |       |        |        |
| <input checked="" type="checkbox"/> | A3  | GAPDH 9     |        |      |       |        |        |      |       |        |        |
| <input checked="" type="checkbox"/> | A4  | GAPDH 10    |        |      |       |        |        |      |       |        |        |
| <input checked="" type="checkbox"/> | A5  | GAPDH 10    |        |      |       |        |        |      |       |        |        |
| <input checked="" type="checkbox"/> | A6  | GAPDH 10    |        |      |       |        |        |      |       |        |        |
| <input checked="" type="checkbox"/> | A7  | GAPDH 11    |        |      |       |        |        |      |       |        |        |
| <input checked="" type="checkbox"/> | A8  | GAPDH 11    |        |      |       |        |        |      |       |        |        |
| <input checked="" type="checkbox"/> | A9  | GAPDH 11    |        |      |       |        |        |      |       |        |        |
| <input checked="" type="checkbox"/> | A10 | GAPDH 12    |        |      |       |        |        |      |       |        |        |
| <input checked="" type="checkbox"/> | A11 | GAPDH 12    |        |      |       |        |        |      |       |        |        |
| <input checked="" type="checkbox"/> | A12 | GAPDH 12    |        |      |       |        |        |      |       |        |        |
| <input checked="" type="checkbox"/> | B1  | FCER1A 9    |        |      |       |        |        |      |       |        |        |
| <input checked="" type="checkbox"/> | B2  | FCER1A 9    |        |      |       |        |        |      |       |        |        |
| <input checked="" type="checkbox"/> | B3  | FCER1A 9    |        |      |       |        |        |      |       |        |        |
| <input checked="" type="checkbox"/> | B4  | FCER1A 10   |        |      |       |        |        |      |       |        |        |
| <input checked="" type="checkbox"/> | B5  | FCER1A 10   |        |      |       |        |        |      |       |        |        |
| <input checked="" type="checkbox"/> | B6  | FCER1A 10   |        |      |       |        |        |      |       |        |        |
| <input checked="" type="checkbox"/> | B7  | FCER1A 11   |        |      |       |        |        |      |       |        |        |
| <input checked="" type="checkbox"/> | B8  | FCER1A 11   |        |      |       |        |        |      |       |        |        |
| <input checked="" type="checkbox"/> | B9  | FCER1A 11   |        |      |       |        |        |      |       |        |        |
| <input checked="" type="checkbox"/> | B10 | FCER1A 12   |        |      |       |        |        |      |       |        |        |
| <input checked="" type="checkbox"/> | B11 | FCER1A 12   |        |      |       |        |        |      |       |        |        |
| <input checked="" type="checkbox"/> | B12 | FCER1A 12   |        |      |       |        |        |      |       |        |        |
| <input checked="" type="checkbox"/> | C1  | RGS1 9      |        |      |       |        |        |      |       |        |        |
| <input checked="" type="checkbox"/> | C2  | RGS1 9      |        |      |       |        |        |      |       |        |        |
| <input checked="" type="checkbox"/> | C3  | RGS1 9      |        |      |       |        |        |      |       |        |        |
| <input checked="" type="checkbox"/> | C4  | RGS1 10     |        |      |       |        |        |      |       |        |        |
| <input checked="" type="checkbox"/> | C5  | RGS1 10     |        |      |       |        |        |      |       |        |        |

## Results

| Inc                                 | Pos | Sample Name | Peak 1 |      |       |        | Peak 2 |      |       |        | Status |
|-------------------------------------|-----|-------------|--------|------|-------|--------|--------|------|-------|--------|--------|
|                                     |     |             | Tm     | Area | Width | Height | Tm     | Area | Width | Height |        |
| <input checked="" type="checkbox"/> | C6  | RGS1 10     |        |      |       |        |        |      |       |        |        |
| <input checked="" type="checkbox"/> | C7  | RGS1 11     |        |      |       |        |        |      |       |        |        |
| <input checked="" type="checkbox"/> | C8  | RGS1 11     |        |      |       |        |        |      |       |        |        |
| <input checked="" type="checkbox"/> | C9  | RGS1 11     |        |      |       |        |        |      |       |        |        |
| <input checked="" type="checkbox"/> | C10 | RGS1 12     |        |      |       |        |        |      |       |        |        |
| <input checked="" type="checkbox"/> | C11 | RGS1 12     |        |      |       |        |        |      |       |        |        |
| <input checked="" type="checkbox"/> | C12 | RGS1 12     |        |      |       |        |        |      |       |        |        |
| <input checked="" type="checkbox"/> | D1  | GAPDH 13    |        |      |       |        |        |      |       |        |        |
| <input checked="" type="checkbox"/> | D2  | GAPDH 13    |        |      |       |        |        |      |       |        |        |
| <input checked="" type="checkbox"/> | D3  | GAPDH 13    |        |      |       |        |        |      |       |        |        |
| <input checked="" type="checkbox"/> | D4  | blank       |        |      |       |        |        |      |       |        |        |
| <input checked="" type="checkbox"/> | D5  | blank       |        |      |       |        |        |      |       |        |        |
| <input checked="" type="checkbox"/> | D6  | blank       |        |      |       |        |        |      |       |        |        |
| <input checked="" type="checkbox"/> | D7  | blank       |        |      |       |        |        |      |       |        |        |
| <input checked="" type="checkbox"/> | D8  | blank       |        |      |       |        |        |      |       |        |        |
| <input checked="" type="checkbox"/> | D9  | blank       |        |      |       |        |        |      |       |        |        |
| <input checked="" type="checkbox"/> | D10 | blank       |        |      |       |        |        |      |       |        |        |
| <input checked="" type="checkbox"/> | D11 | blank       |        |      |       |        |        |      |       |        |        |
| <input checked="" type="checkbox"/> | D12 | blank       |        |      |       |        |        |      |       |        |        |
| <input checked="" type="checkbox"/> | E1  | FCER1A 13   |        |      |       |        |        |      |       |        |        |
| <input checked="" type="checkbox"/> | E2  | FCER1A 13   |        |      |       |        |        |      |       |        |        |
| <input checked="" type="checkbox"/> | E3  | FCER1A 13   |        |      |       |        |        |      |       |        |        |
| <input checked="" type="checkbox"/> | E4  | blank       |        |      |       |        |        |      |       |        |        |
| <input checked="" type="checkbox"/> | E5  | blank       |        |      |       |        |        |      |       |        |        |
| <input checked="" type="checkbox"/> | E6  | blank       |        |      |       |        |        |      |       |        |        |
| <input checked="" type="checkbox"/> | E7  | blank       |        |      |       |        |        |      |       |        |        |
| <input checked="" type="checkbox"/> | E8  | blank       |        |      |       |        |        |      |       |        |        |
| <input checked="" type="checkbox"/> | E9  | blank       |        |      |       |        |        |      |       |        |        |
| <input checked="" type="checkbox"/> | E10 | blank       |        |      |       |        |        |      |       |        |        |
| <input checked="" type="checkbox"/> | E11 | blank       |        |      |       |        |        |      |       |        |        |
| <input checked="" type="checkbox"/> | E12 | blank       |        |      |       |        |        |      |       |        |        |
| <input checked="" type="checkbox"/> | F1  | RGS1 13     |        |      |       |        |        |      |       |        |        |
| <input checked="" type="checkbox"/> | F2  | RGS1 13     |        |      |       |        |        |      |       |        |        |
| <input checked="" type="checkbox"/> | F3  | RGS1 13     |        |      |       |        |        |      |       |        |        |
| <input checked="" type="checkbox"/> | F4  | blank       |        |      |       |        |        |      |       |        |        |
| <input checked="" type="checkbox"/> | F5  | blank       |        |      |       |        |        |      |       |        |        |

## Results

| Inc                                 | Pos | Sample Name | Peak 1 |      |       |        | Peak 2 |      |       |        | Status |
|-------------------------------------|-----|-------------|--------|------|-------|--------|--------|------|-------|--------|--------|
|                                     |     |             | Tm     | Area | Width | Height | Tm     | Area | Width | Height |        |
| <input checked="" type="checkbox"/> | F6  | blank       |        |      |       |        |        |      |       |        |        |
| <input checked="" type="checkbox"/> | F7  | blank       |        |      |       |        |        |      |       |        |        |
| <input checked="" type="checkbox"/> | F8  | blank       |        |      |       |        |        |      |       |        |        |
| <input checked="" type="checkbox"/> | F9  | blank       |        |      |       |        |        |      |       |        |        |
| <input checked="" type="checkbox"/> | F10 | blank       |        |      |       |        |        |      |       |        |        |
| <input checked="" type="checkbox"/> | F11 | blank       |        |      |       |        |        |      |       |        |        |
| <input checked="" type="checkbox"/> | F12 | blank       |        |      |       |        |        |      |       |        |        |
| <input checked="" type="checkbox"/> | G1  | blank       |        |      |       |        |        |      |       |        |        |
| <input checked="" type="checkbox"/> | G2  | blank       |        |      |       |        |        |      |       |        |        |
| <input checked="" type="checkbox"/> | G3  | blank       |        |      |       |        |        |      |       |        |        |
| <input checked="" type="checkbox"/> | G4  | blank       |        |      |       |        |        |      |       |        |        |
| <input checked="" type="checkbox"/> | G5  | blank       |        |      |       |        |        |      |       |        |        |
| <input checked="" type="checkbox"/> | G6  | blank       |        |      |       |        |        |      |       |        |        |
| <input checked="" type="checkbox"/> | G7  | blank       |        |      |       |        |        |      |       |        |        |
| <input checked="" type="checkbox"/> | G8  | blank       |        |      |       |        |        |      |       |        |        |
| <input checked="" type="checkbox"/> | G9  | blank       |        |      |       |        |        |      |       |        |        |
| <input checked="" type="checkbox"/> | G10 | blank       |        |      |       |        |        |      |       |        |        |
| <input checked="" type="checkbox"/> | G11 | blank       |        |      |       |        |        |      |       |        |        |
| <input checked="" type="checkbox"/> | G12 | blank       |        |      |       |        |        |      |       |        |        |
| <input checked="" type="checkbox"/> | H1  | blank       |        |      |       |        |        |      |       |        |        |
| <input checked="" type="checkbox"/> | H2  | blank       |        |      |       |        |        |      |       |        |        |
| <input checked="" type="checkbox"/> | H3  | blank       |        |      |       |        |        |      |       |        |        |
| <input checked="" type="checkbox"/> | H4  | blank       |        |      |       |        |        |      |       |        |        |
| <input checked="" type="checkbox"/> | H5  | blank       |        |      |       |        |        |      |       |        |        |
| <input checked="" type="checkbox"/> | H6  | blank       |        |      |       |        |        |      |       |        |        |
| <input checked="" type="checkbox"/> | H7  | blank       |        |      |       |        |        |      |       |        |        |
| <input checked="" type="checkbox"/> | H8  | blank       |        |      |       |        |        |      |       |        |        |
| <input checked="" type="checkbox"/> | H9  | blank       |        |      |       |        |        |      |       |        |        |
| <input checked="" type="checkbox"/> | H10 | blank       |        |      |       |        |        |      |       |        |        |
| <input checked="" type="checkbox"/> | H11 | blank       |        |      |       |        |        |      |       |        |        |
| <input checked="" type="checkbox"/> | H12 | blank       |        |      |       |        |        |      |       |        |        |

### Melting Curves

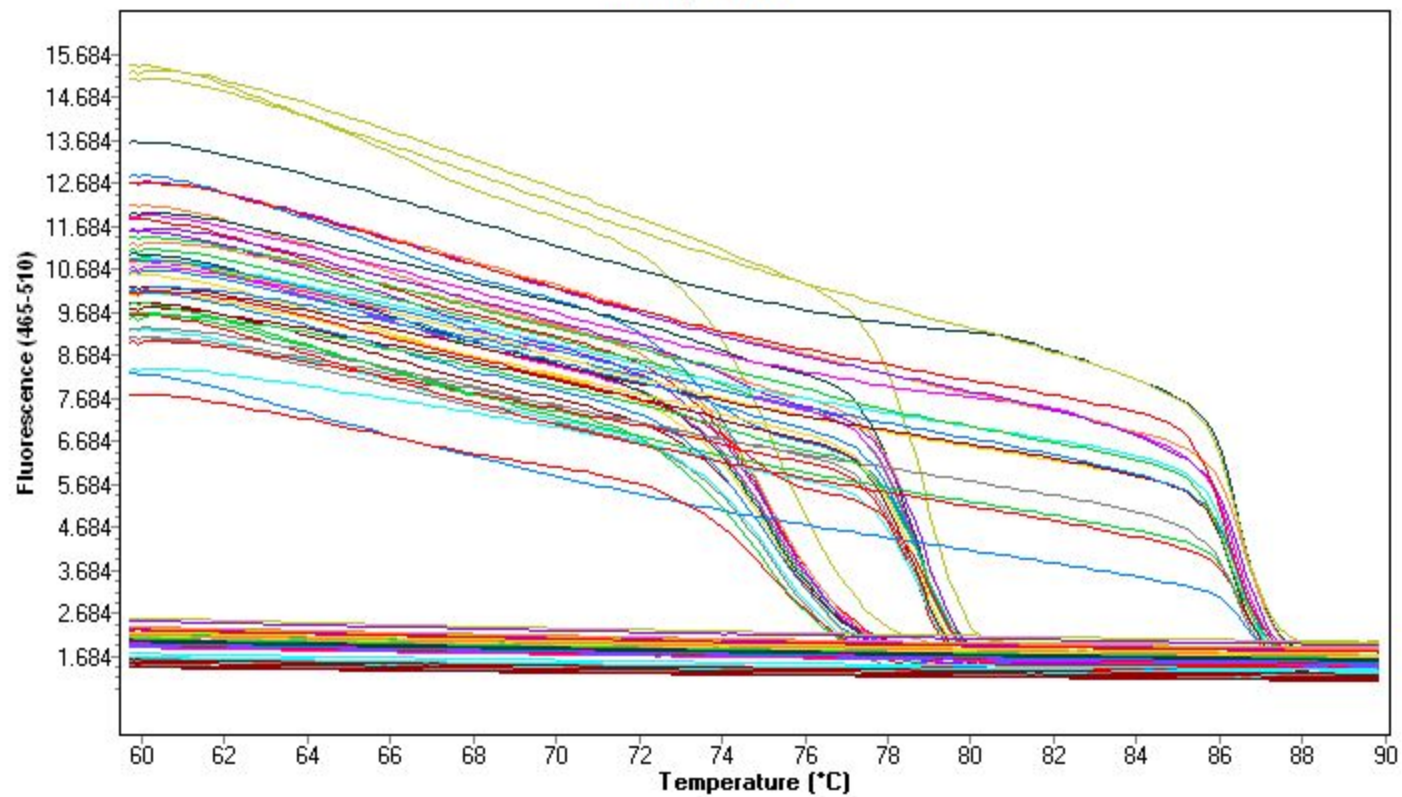

### Melting Peaks

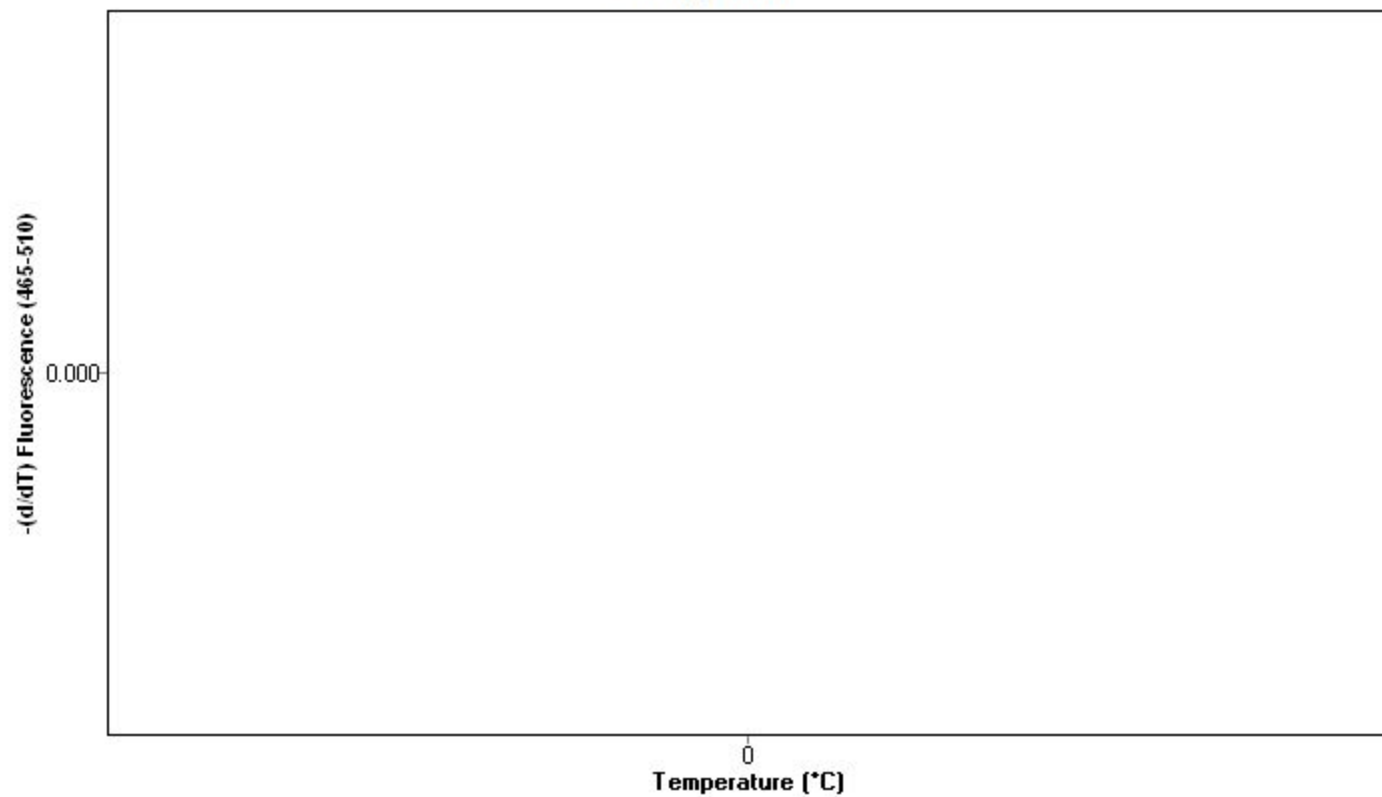

### Analysis Notes

## Melt Curve Genotyping for All Samples (1) (Melt Curve Genotyping)

|                |            |                    |       |
|----------------|------------|--------------------|-------|
| Channel        | 465-510    | Color Compensation | Off   |
| Program Name   | Program    |                    |       |
| Std's Settings | Auto-Group |                    |       |
| Sensitivity    | Normal     | Temp Range         | 62-86 |
| Score          | 0.7        | Res                | 0.1   |

|             |             |
|-------------|-------------|
| Subset Name | All Samples |
|-------------|-------------|

### Results

| Inc                                 | Pos. | Sample Name | Sample Type | Group | Score | Resolution | Status |
|-------------------------------------|------|-------------|-------------|-------|-------|------------|--------|
| <input checked="" type="checkbox"/> | A1   | GAPDH 9     | Unknown     | 2     | 0.99  | 0.89       |        |
| <input checked="" type="checkbox"/> | A2   | GAPDH 9     | Unknown     | 2     | 0.99  | 0.83       |        |
| <input checked="" type="checkbox"/> | A3   | GAPDH 9     | Unknown     | 2     | 0.99  | 0.83       |        |
| <input checked="" type="checkbox"/> | A4   | GAPDH 10    | Unknown     | 2     | 0.98  | 0.80       |        |
| <input checked="" type="checkbox"/> | A5   | GAPDH 10    | Unknown     | 2     | 0.98  | 0.82       |        |
| <input checked="" type="checkbox"/> | A6   | GAPDH 10    | Unknown     | 2     | 0.98  | 0.84       |        |
| <input checked="" type="checkbox"/> | A7   | GAPDH 11    | Unknown     | 2     | 0.97  | 0.75       |        |
| <input checked="" type="checkbox"/> | A8   | GAPDH 11    | Unknown     | 2     | 0.99  | 0.80       |        |
| <input checked="" type="checkbox"/> | A9   | GAPDH 11    | Unknown     | 2     | 0.99  | 0.83       |        |
| <input checked="" type="checkbox"/> | A10  | GAPDH 12    | Unknown     | 2     | 1.00  | 0.82       |        |
| <input checked="" type="checkbox"/> | A11  | GAPDH 12    | Unknown     | 2     | 0.99  | 0.80       |        |
| <input checked="" type="checkbox"/> | A12  | GAPDH 12    | Unknown     | 2     | 0.99  | 0.78       |        |
| <input checked="" type="checkbox"/> | B1   | FCER1A 9    | Unknown     | 3     | 0.93  | 0.64       |        |
| <input checked="" type="checkbox"/> | B2   | FCER1A 9    | Unknown     | 3     | 0.99  | 0.77       |        |
| <input checked="" type="checkbox"/> | B3   | FCER1A 9    | Unknown     | 3     | 0.99  | 0.76       |        |
| <input checked="" type="checkbox"/> | B4   | FCER1A 10   | Unknown     | 3     | 0.98  | 0.83       |        |
| <input checked="" type="checkbox"/> | B5   | FCER1A 10   | Unknown     | 3     | 0.98  | 0.82       |        |
| <input checked="" type="checkbox"/> | B6   | FCER1A 10   | Unknown     | 3     | 0.99  | 0.77       |        |
| <input checked="" type="checkbox"/> | B7   | FCER1A 11   | Unknown     | 3     | 0.98  | 0.78       |        |
| <input checked="" type="checkbox"/> | B8   | FCER1A 11   | Unknown     | 3     | 0.99  | 0.82       |        |
| <input checked="" type="checkbox"/> | B9   | FCER1A 11   | Unknown     | 3     | 0.99  | 0.76       |        |
| <input checked="" type="checkbox"/> | B10  | FCER1A 12   | Unknown     | 3     | 1.00  | 0.82       |        |
| <input checked="" type="checkbox"/> | B11  | FCER1A 12   | Unknown     | 3     | 0.97  | 0.76       |        |
| <input checked="" type="checkbox"/> | B12  | FCER1A 12   | Unknown     | 3     | 0.99  | 0.81       |        |
| <input checked="" type="checkbox"/> | C1   | RGS1 9      | Unknown     | 1     | 0.90  | 0.84       |        |
| <input checked="" type="checkbox"/> | C2   | RGS1 9      | Unknown     | 1     | 0.95  | 0.90       |        |
| <input checked="" type="checkbox"/> | C3   | RGS1 9      | Unknown     | 1     | 0.95  | 0.89       |        |
| <input checked="" type="checkbox"/> | C4   | RGS1 10     | Unknown     | 1     | 0.98  | 0.91       |        |
| <input checked="" type="checkbox"/> | C5   | RGS1 10     | Unknown     | 1     | 0.99  | 0.92       |        |
| <input checked="" type="checkbox"/> | C6   | RGS1 10     | Unknown     | 1     | 0.98  | 0.88       |        |
| <input checked="" type="checkbox"/> | C7   | RGS1 11     | Unknown     | 1     | 0.99  | 0.91       |        |

## Results

| Inc                                 | Pos. | Sample Name | Sample Type | Group    | Score | Resolution | Status |
|-------------------------------------|------|-------------|-------------|----------|-------|------------|--------|
| <input checked="" type="checkbox"/> | C8   | RGS1 11     | Unknown     | 1        | 0.98  | 0.89       |        |
| <input checked="" type="checkbox"/> | C9   | RGS1 11     | Unknown     | 1        | 0.96  | 0.90       |        |
| <input checked="" type="checkbox"/> | C10  | RGS1 12     | Unknown     | 1        | 0.99  | 0.90       |        |
| <input checked="" type="checkbox"/> | C11  | RGS1 12     | Unknown     | 1        | 0.99  | 0.93       |        |
| <input checked="" type="checkbox"/> | C12  | RGS1 12     | Unknown     | 1        | 0.99  | 0.92       |        |
| <input checked="" type="checkbox"/> | D1   | GAPDH 13    | Unknown     | 2        | 0.99  | 0.82       |        |
| <input checked="" type="checkbox"/> | D2   | GAPDH 13    | Unknown     | 2        | 0.99  | 0.81       |        |
| <input checked="" type="checkbox"/> | D3   | GAPDH 13    | Unknown     | 2        | 0.98  | 0.91       |        |
| <input checked="" type="checkbox"/> | D4   | blank       | Unknown     | Negative | 1.00  | 1.00       |        |
| <input checked="" type="checkbox"/> | D5   | blank       | Unknown     | Negative | 1.00  | 1.00       |        |
| <input checked="" type="checkbox"/> | D6   | blank       | Unknown     | Negative | 1.00  | 1.00       |        |
| <input checked="" type="checkbox"/> | D7   | blank       | Unknown     | Negative | 1.00  | 1.00       |        |
| <input checked="" type="checkbox"/> | D8   | blank       | Unknown     | Negative | 1.00  | 1.00       |        |
| <input checked="" type="checkbox"/> | D9   | blank       | Unknown     | Negative | 1.00  | 1.00       |        |
| <input checked="" type="checkbox"/> | D10  | blank       | Unknown     | Negative | 1.00  | 1.00       |        |
| <input checked="" type="checkbox"/> | D11  | blank       | Unknown     | Negative | 1.00  | 1.00       |        |
| <input checked="" type="checkbox"/> | D12  | blank       | Unknown     | Negative | 1.00  | 1.00       |        |
| <input checked="" type="checkbox"/> | E1   | FCER1A 13   | Unknown     | 3        | 0.99  | 0.80       |        |
| <input checked="" type="checkbox"/> | E2   | FCER1A 13   | Unknown     | Unknown  | 0.66  | 0.20       |        |
| <input checked="" type="checkbox"/> | E3   | FCER1A 13   | Unknown     | 3        | 0.99  | 0.79       |        |
| <input checked="" type="checkbox"/> | E4   | blank       | Unknown     | Negative | 1.00  | 1.00       |        |
| <input checked="" type="checkbox"/> | E5   | blank       | Unknown     | Negative | 1.00  | 1.00       |        |
| <input checked="" type="checkbox"/> | E6   | blank       | Unknown     | Negative | 1.00  | 1.00       |        |
| <input checked="" type="checkbox"/> | E7   | blank       | Unknown     | Negative | 1.00  | 1.00       |        |
| <input checked="" type="checkbox"/> | E8   | blank       | Unknown     | Negative | 1.00  | 1.00       |        |
| <input checked="" type="checkbox"/> | E9   | blank       | Unknown     | Negative | 1.00  | 1.00       |        |
| <input checked="" type="checkbox"/> | E10  | blank       | Unknown     | Negative | 1.00  | 1.00       |        |
| <input checked="" type="checkbox"/> | E11  | blank       | Unknown     | Negative | 1.00  | 1.00       |        |
| <input checked="" type="checkbox"/> | E12  | blank       | Unknown     | Negative | 1.00  | 1.00       |        |
| <input checked="" type="checkbox"/> | F1   | RGS1 13     | Unknown     | 1        | 1.00  | 0.92       |        |
| <input checked="" type="checkbox"/> | F2   | RGS1 13     | Unknown     | 1        | 0.97  | 0.90       |        |
| <input checked="" type="checkbox"/> | F3   | RGS1 13     | Unknown     | 1        | 0.98  | 0.90       |        |
| <input checked="" type="checkbox"/> | F4   | blank       | Unknown     | Negative | 1.00  | 1.00       |        |
| <input checked="" type="checkbox"/> | F5   | blank       | Unknown     | Negative | 1.00  | 1.00       |        |
| <input checked="" type="checkbox"/> | F6   | blank       | Unknown     | Negative | 1.00  | 1.00       |        |
| <input checked="" type="checkbox"/> | F7   | blank       | Unknown     | Negative | 1.00  | 1.00       |        |
| <input checked="" type="checkbox"/> | F8   | blank       | Unknown     | Negative | 1.00  | 1.00       |        |
| <input checked="" type="checkbox"/> | F9   | blank       | Unknown     | Negative | 1.00  | 1.00       |        |

## Results

| Inc                                 | Pos. | Sample Name | Sample Type | Group    | Score | Resolution | Status |
|-------------------------------------|------|-------------|-------------|----------|-------|------------|--------|
| <input checked="" type="checkbox"/> | F10  | blank       | Unknown     | Negative | 1.00  | 1.00       |        |
| <input checked="" type="checkbox"/> | F11  | blank       | Unknown     | Negative | 1.00  | 1.00       |        |
| <input checked="" type="checkbox"/> | F12  | blank       | Unknown     | Negative | 1.00  | 1.00       |        |
| <input checked="" type="checkbox"/> | G1   | blank       | Unknown     | Negative | 1.00  | 1.00       |        |
| <input checked="" type="checkbox"/> | G2   | blank       | Unknown     | Negative | 1.00  | 1.00       |        |
| <input checked="" type="checkbox"/> | G3   | blank       | Unknown     | Negative | 1.00  | 1.00       |        |
| <input checked="" type="checkbox"/> | G4   | blank       | Unknown     | Negative | 1.00  | 1.00       |        |
| <input checked="" type="checkbox"/> | G5   | blank       | Unknown     | Negative | 1.00  | 1.00       |        |
| <input checked="" type="checkbox"/> | G6   | blank       | Unknown     | Negative | 1.00  | 1.00       |        |
| <input checked="" type="checkbox"/> | G7   | blank       | Unknown     | Negative | 1.00  | 1.00       |        |
| <input checked="" type="checkbox"/> | G8   | blank       | Unknown     | Negative | 1.00  | 1.00       |        |
| <input checked="" type="checkbox"/> | G9   | blank       | Unknown     | Negative | 1.00  | 1.00       |        |
| <input checked="" type="checkbox"/> | G10  | blank       | Unknown     | Negative | 1.00  | 1.00       |        |
| <input checked="" type="checkbox"/> | G11  | blank       | Unknown     | Negative | 1.00  | 1.00       |        |
| <input checked="" type="checkbox"/> | G12  | blank       | Unknown     | Negative | 1.00  | 1.00       |        |
| <input checked="" type="checkbox"/> | H1   | blank       | Unknown     | Negative | 1.00  | 1.00       |        |
| <input checked="" type="checkbox"/> | H2   | blank       | Unknown     | Negative | 1.00  | 1.00       |        |
| <input checked="" type="checkbox"/> | H3   | blank       | Unknown     | Negative | 1.00  | 1.00       |        |
| <input checked="" type="checkbox"/> | H4   | blank       | Unknown     | Negative | 1.00  | 1.00       |        |
| <input checked="" type="checkbox"/> | H5   | blank       | Unknown     | Negative | 1.00  | 1.00       |        |
| <input checked="" type="checkbox"/> | H6   | blank       | Unknown     | Negative | 1.00  | 1.00       |        |
| <input checked="" type="checkbox"/> | H7   | blank       | Unknown     | Negative | 1.00  | 1.00       |        |
| <input checked="" type="checkbox"/> | H8   | blank       | Unknown     | Negative | 1.00  | 1.00       |        |
| <input checked="" type="checkbox"/> | H9   | blank       | Unknown     | Negative | 1.00  | 1.00       |        |
| <input checked="" type="checkbox"/> | H10  | blank       | Unknown     | Negative | 1.00  | 1.00       |        |
| <input checked="" type="checkbox"/> | H11  | blank       | Unknown     | Negative | 1.00  | 1.00       |        |
| <input checked="" type="checkbox"/> | H12  | blank       | Unknown     | Negative | 1.00  | 1.00       |        |

## Group 1

| Inc                                 | Pos | Sample Name | Sample Type | Score | Resolution | Status |
|-------------------------------------|-----|-------------|-------------|-------|------------|--------|
| <input checked="" type="checkbox"/> | C1  | RGS1 9      | Unknown     | 0.90  | 0.84       |        |
| <input checked="" type="checkbox"/> | C2  | RGS1 9      | Unknown     | 0.95  | 0.90       |        |
| <input checked="" type="checkbox"/> | C3  | RGS1 9      | Unknown     | 0.95  | 0.89       |        |
| <input checked="" type="checkbox"/> | C4  | RGS1 10     | Unknown     | 0.98  | 0.91       |        |
| <input checked="" type="checkbox"/> | C5  | RGS1 10     | Unknown     | 0.99  | 0.92       |        |
| <input checked="" type="checkbox"/> | C6  | RGS1 10     | Unknown     | 0.98  | 0.88       |        |
| <input checked="" type="checkbox"/> | C7  | RGS1 11     | Unknown     | 0.99  | 0.91       |        |
| <input checked="" type="checkbox"/> | C8  | RGS1 11     | Unknown     | 0.98  | 0.89       |        |

| Group 1                             |     |             |             |       |            |        |
|-------------------------------------|-----|-------------|-------------|-------|------------|--------|
| Inc                                 | Pos | Sample Name | Sample Type | Score | Resolution | Status |
| <input checked="" type="checkbox"/> | C9  | RGS1 11     | Unknown     | 0.96  | 0.90       |        |
| <input checked="" type="checkbox"/> | C10 | RGS1 12     | Unknown     | 0.99  | 0.90       |        |
| <input checked="" type="checkbox"/> | C11 | RGS1 12     | Unknown     | 0.99  | 0.93       |        |
| <input checked="" type="checkbox"/> | C12 | RGS1 12     | Unknown     | 0.99  | 0.92       |        |
| <input checked="" type="checkbox"/> | F1  | RGS1 13     | Unknown     | 1.00  | 0.92       |        |
| <input checked="" type="checkbox"/> | F2  | RGS1 13     | Unknown     | 0.97  | 0.90       |        |
| <input checked="" type="checkbox"/> | F3  | RGS1 13     | Unknown     | 0.98  | 0.90       |        |

| Group 2                             |     |             |             |       |            |        |
|-------------------------------------|-----|-------------|-------------|-------|------------|--------|
| Inc                                 | Pos | Sample Name | Sample Type | Score | Resolution | Status |
| <input checked="" type="checkbox"/> | A1  | GAPDH 9     | Unknown     | 0.99  | 0.89       |        |
| <input checked="" type="checkbox"/> | A2  | GAPDH 9     | Unknown     | 0.99  | 0.83       |        |
| <input checked="" type="checkbox"/> | A3  | GAPDH 9     | Unknown     | 0.99  | 0.83       |        |
| <input checked="" type="checkbox"/> | A4  | GAPDH 10    | Unknown     | 0.98  | 0.80       |        |
| <input checked="" type="checkbox"/> | A5  | GAPDH 10    | Unknown     | 0.98  | 0.82       |        |
| <input checked="" type="checkbox"/> | A6  | GAPDH 10    | Unknown     | 0.98  | 0.84       |        |
| <input checked="" type="checkbox"/> | A7  | GAPDH 11    | Unknown     | 0.97  | 0.75       |        |
| <input checked="" type="checkbox"/> | A8  | GAPDH 11    | Unknown     | 0.99  | 0.80       |        |
| <input checked="" type="checkbox"/> | A9  | GAPDH 11    | Unknown     | 0.99  | 0.83       |        |
| <input checked="" type="checkbox"/> | A10 | GAPDH 12    | Unknown     | 1.00  | 0.82       |        |
| <input checked="" type="checkbox"/> | A11 | GAPDH 12    | Unknown     | 0.99  | 0.80       |        |
| <input checked="" type="checkbox"/> | A12 | GAPDH 12    | Unknown     | 0.99  | 0.78       |        |
| <input checked="" type="checkbox"/> | D1  | GAPDH 13    | Unknown     | 0.99  | 0.82       |        |
| <input checked="" type="checkbox"/> | D2  | GAPDH 13    | Unknown     | 0.99  | 0.81       |        |
| <input checked="" type="checkbox"/> | D3  | GAPDH 13    | Unknown     | 0.98  | 0.91       |        |

| Group 3                             |     |             |             |       |            |        |
|-------------------------------------|-----|-------------|-------------|-------|------------|--------|
| Inc                                 | Pos | Sample Name | Sample Type | Score | Resolution | Status |
| <input checked="" type="checkbox"/> | B1  | FCER1A 9    | Unknown     | 0.93  | 0.64       |        |
| <input checked="" type="checkbox"/> | B2  | FCER1A 9    | Unknown     | 0.99  | 0.77       |        |
| <input checked="" type="checkbox"/> | B3  | FCER1A 9    | Unknown     | 0.99  | 0.76       |        |
| <input checked="" type="checkbox"/> | B4  | FCER1A 10   | Unknown     | 0.98  | 0.83       |        |
| <input checked="" type="checkbox"/> | B5  | FCER1A 10   | Unknown     | 0.98  | 0.82       |        |
| <input checked="" type="checkbox"/> | B6  | FCER1A 10   | Unknown     | 0.99  | 0.77       |        |
| <input checked="" type="checkbox"/> | B7  | FCER1A 11   | Unknown     | 0.98  | 0.78       |        |
| <input checked="" type="checkbox"/> | B8  | FCER1A 11   | Unknown     | 0.99  | 0.82       |        |
| <input checked="" type="checkbox"/> | B9  | FCER1A 11   | Unknown     | 0.99  | 0.76       |        |
| <input checked="" type="checkbox"/> | B10 | FCER1A 12   | Unknown     | 1.00  | 0.82       |        |



**Group 3**

| Inc                                 | Pos | Sample Name | Sample Type | Score | Resolution | Status |
|-------------------------------------|-----|-------------|-------------|-------|------------|--------|
| <input checked="" type="checkbox"/> | B11 | FCER1A 12   | Unknown     | 0.97  | 0.76       |        |
| <input checked="" type="checkbox"/> | B12 | FCER1A 12   | Unknown     | 0.99  | 0.81       |        |
| <input checked="" type="checkbox"/> | E1  | FCER1A 13   | Unknown     | 0.99  | 0.80       |        |
| <input checked="" type="checkbox"/> | E3  | FCER1A 13   | Unknown     | 0.99  | 0.79       |        |

**Group Negative**

| Inc                                 | Pos | Sample Name | Sample Type | Score | Resolution | Status |
|-------------------------------------|-----|-------------|-------------|-------|------------|--------|
| <input checked="" type="checkbox"/> | D4  | blank       | Unknown     | 1.00  | 1.00       |        |
| <input checked="" type="checkbox"/> | D5  | blank       | Unknown     | 1.00  | 1.00       |        |
| <input checked="" type="checkbox"/> | D6  | blank       | Unknown     | 1.00  | 1.00       |        |
| <input checked="" type="checkbox"/> | D7  | blank       | Unknown     | 1.00  | 1.00       |        |
| <input checked="" type="checkbox"/> | D8  | blank       | Unknown     | 1.00  | 1.00       |        |
| <input checked="" type="checkbox"/> | D9  | blank       | Unknown     | 1.00  | 1.00       |        |
| <input checked="" type="checkbox"/> | D10 | blank       | Unknown     | 1.00  | 1.00       |        |
| <input checked="" type="checkbox"/> | D11 | blank       | Unknown     | 1.00  | 1.00       |        |
| <input checked="" type="checkbox"/> | D12 | blank       | Unknown     | 1.00  | 1.00       |        |
| <input checked="" type="checkbox"/> | E4  | blank       | Unknown     | 1.00  | 1.00       |        |
| <input checked="" type="checkbox"/> | E5  | blank       | Unknown     | 1.00  | 1.00       |        |
| <input checked="" type="checkbox"/> | E6  | blank       | Unknown     | 1.00  | 1.00       |        |
| <input checked="" type="checkbox"/> | E7  | blank       | Unknown     | 1.00  | 1.00       |        |
| <input checked="" type="checkbox"/> | E8  | blank       | Unknown     | 1.00  | 1.00       |        |
| <input checked="" type="checkbox"/> | E9  | blank       | Unknown     | 1.00  | 1.00       |        |
| <input checked="" type="checkbox"/> | E10 | blank       | Unknown     | 1.00  | 1.00       |        |
| <input checked="" type="checkbox"/> | E11 | blank       | Unknown     | 1.00  | 1.00       |        |
| <input checked="" type="checkbox"/> | E12 | blank       | Unknown     | 1.00  | 1.00       |        |
| <input checked="" type="checkbox"/> | F4  | blank       | Unknown     | 1.00  | 1.00       |        |
| <input checked="" type="checkbox"/> | F5  | blank       | Unknown     | 1.00  | 1.00       |        |
| <input checked="" type="checkbox"/> | F6  | blank       | Unknown     | 1.00  | 1.00       |        |
| <input checked="" type="checkbox"/> | F7  | blank       | Unknown     | 1.00  | 1.00       |        |
| <input checked="" type="checkbox"/> | F8  | blank       | Unknown     | 1.00  | 1.00       |        |
| <input checked="" type="checkbox"/> | F9  | blank       | Unknown     | 1.00  | 1.00       |        |
| <input checked="" type="checkbox"/> | F10 | blank       | Unknown     | 1.00  | 1.00       |        |
| <input checked="" type="checkbox"/> | F11 | blank       | Unknown     | 1.00  | 1.00       |        |
| <input checked="" type="checkbox"/> | F12 | blank       | Unknown     | 1.00  | 1.00       |        |
| <input checked="" type="checkbox"/> | G1  | blank       | Unknown     | 1.00  | 1.00       |        |
| <input checked="" type="checkbox"/> | G2  | blank       | Unknown     | 1.00  | 1.00       |        |
| <input checked="" type="checkbox"/> | G3  | blank       | Unknown     | 1.00  | 1.00       |        |
| <input checked="" type="checkbox"/> | G4  | blank       | Unknown     | 1.00  | 1.00       |        |

| Group                               |     | Negative    |             |       |            |        |
|-------------------------------------|-----|-------------|-------------|-------|------------|--------|
| Inc                                 | Pos | Sample Name | Sample Type | Score | Resolution | Status |
| <input checked="" type="checkbox"/> | G5  | blank       | Unknown     | 1.00  | 1.00       |        |
| <input checked="" type="checkbox"/> | G6  | blank       | Unknown     | 1.00  | 1.00       |        |
| <input checked="" type="checkbox"/> | G7  | blank       | Unknown     | 1.00  | 1.00       |        |
| <input checked="" type="checkbox"/> | G8  | blank       | Unknown     | 1.00  | 1.00       |        |
| <input checked="" type="checkbox"/> | G9  | blank       | Unknown     | 1.00  | 1.00       |        |
| <input checked="" type="checkbox"/> | G10 | blank       | Unknown     | 1.00  | 1.00       |        |
| <input checked="" type="checkbox"/> | G11 | blank       | Unknown     | 1.00  | 1.00       |        |
| <input checked="" type="checkbox"/> | G12 | blank       | Unknown     | 1.00  | 1.00       |        |
| <input checked="" type="checkbox"/> | H1  | blank       | Unknown     | 1.00  | 1.00       |        |
| <input checked="" type="checkbox"/> | H2  | blank       | Unknown     | 1.00  | 1.00       |        |
| <input checked="" type="checkbox"/> | H3  | blank       | Unknown     | 1.00  | 1.00       |        |
| <input checked="" type="checkbox"/> | H4  | blank       | Unknown     | 1.00  | 1.00       |        |
| <input checked="" type="checkbox"/> | H5  | blank       | Unknown     | 1.00  | 1.00       |        |
| <input checked="" type="checkbox"/> | H6  | blank       | Unknown     | 1.00  | 1.00       |        |
| <input checked="" type="checkbox"/> | H7  | blank       | Unknown     | 1.00  | 1.00       |        |
| <input checked="" type="checkbox"/> | H8  | blank       | Unknown     | 1.00  | 1.00       |        |
| <input checked="" type="checkbox"/> | H9  | blank       | Unknown     | 1.00  | 1.00       |        |
| <input checked="" type="checkbox"/> | H10 | blank       | Unknown     | 1.00  | 1.00       |        |
| <input checked="" type="checkbox"/> | H11 | blank       | Unknown     | 1.00  | 1.00       |        |
| <input checked="" type="checkbox"/> | H12 | blank       | Unknown     | 1.00  | 1.00       |        |

| Group                               |     | Unknown     |             |       |            |        |
|-------------------------------------|-----|-------------|-------------|-------|------------|--------|
| Inc                                 | Pos | Sample Name | Sample Type | Score | Resolution | Status |
| <input checked="" type="checkbox"/> | E2  | FCER1A 13   | Unknown     | 0.66  | 0.20       |        |

### Melting Curves



### Melting Peaks

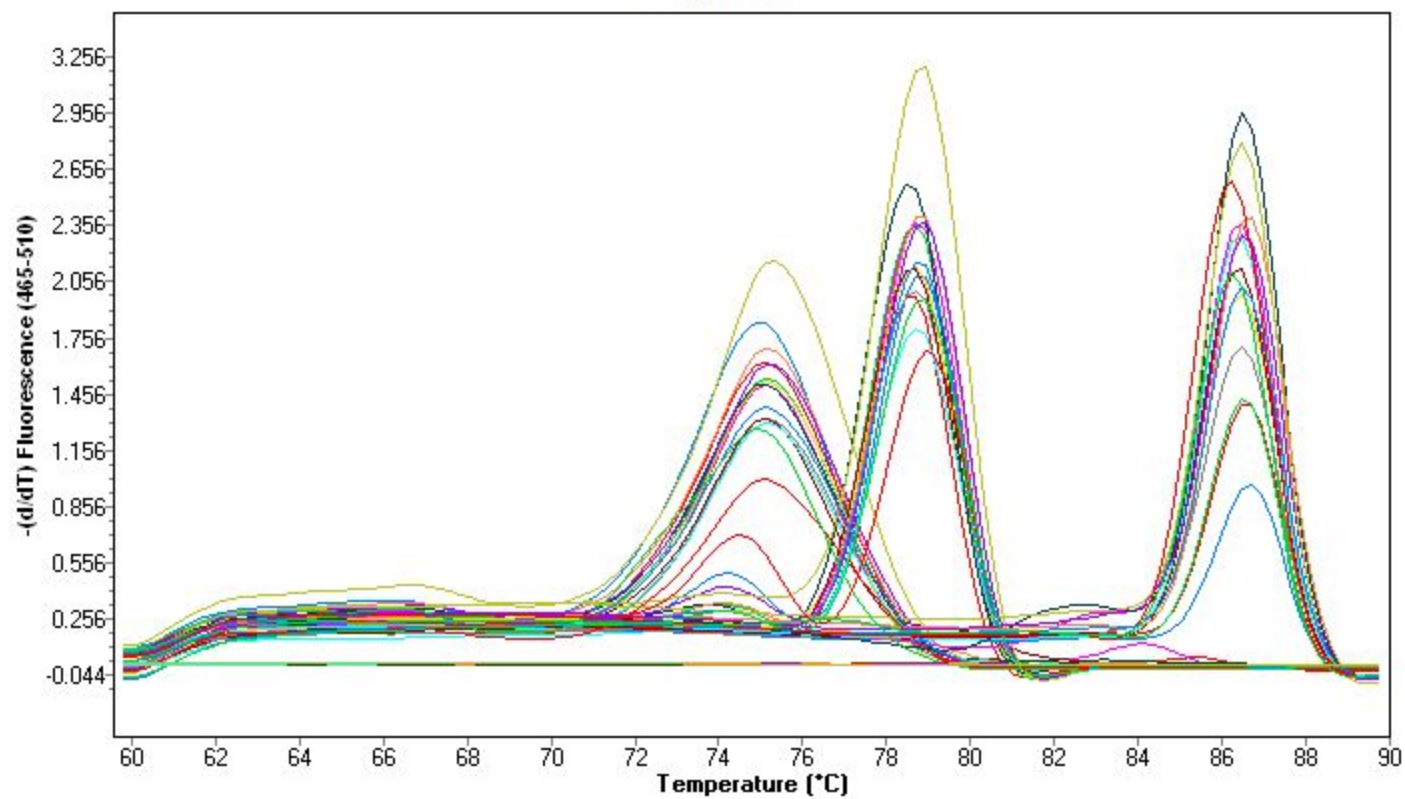

### Analysis Notes
