# Supplementary material for: Exploring differential gene expression and biomarker potential in systemic lupus erythematosus: a retrospective study
Source: PeerJ. 2025 Sep 8;13:e19891. doi: 10.7717/peerj.19891 (PMC12424612; doi:10.7717/peerj.19891)
Supplement: Supplemental Information 3 — The expression of cytokine in SLE patients and healthy controls. [file peerj-13-19891-s003.xlsx]

## Sheet: serum cytokine
	IL-6				TNF-α				IL-10
	HC	SLE			HC	SLE			HC	SLE
1	7.98	19.92		1	7.27	30.11		1	35.22	13.98
2	19.79	35.29		2	9.92	41.8		2	12.87	16.11
3	14.45	38.8		3	12.82	19.53		3	37.27	13.57
4	22.73	65.52		4	21.51	6.63		4	28.31	7.17
5	14.08	12.36		5	21.8	26.74		5	13.06	4.24
6	18.66	52.48		6	20.3	39.59		6	33.93	8.2
7	20.43	24.35		7	19.16	39.01		7	22.7	4.7
8	15.43	6.01		8	17.45	9.21		8	23.14	24.23
9	18.07	10.7		9	15.4	26.79		9	33.39	19.46
10	17.89	42.47		10	18.92	14.92		10	12.82	6.1
11	6.26	39.18		11	10.78	31.84		11	30.34	21.71
12	7.7	16.02		12	5.71	36.3		12	10.83	5.67
13	9.29	14.09		13	22.88	30.73		13	14.76	25.76
14	20.54	37.24		14	18.91	31.73		14	35.66	6.74
15	25.42	22.48		15	4.62	13.28		15	16.9	13.86
16	20.02	40.14		16	14.95	24.4		16	19.36	7.97
17	14.45	5.03		17	21.48	7.14		17	32.47	8.56
18	5.92	65.41		18	10.44	17.81		18	12.94	16.88
	Statistical Method				Statistical Method				Statistical Method
	Table Analyzed	IL-6			Table Analyzed	TNF-α			Table Analyzed	IL-10
	Column B	SLE			Column B	SLE			Column B	SLE
	vs.	vs.			vs.	vs.			vs.	vs.
	Column A	HC			Column A	HC			Column A	HC
	Unpaired t test				Unpaired t test				Unpaired t test
	P value	0.003			P value	0.0031			P value	0.0003
	P value summary	**			P value summary	**			P value summary	***
	Significantly different (P < 0.05)?	Yes			Significantly different (P < 0.05)?	Yes			Significantly different (P < 0.05)?	Yes
	One- or two-tailed P value?	Two-tailed			One- or two-tailed P value?	Two-tailed			One- or two-tailed P value?	Two-tailed
	t, df	t=3.201, df=34			t, df	t=3.182, df=34			t, df	t=3.993, df=34
	How big is the difference?				How big is the difference?				How big is the difference?
	Mean of column A	15.51			Mean of column A	15.24			Mean of column A	23.67
	Mean of column B	30.42			Mean of column B	24.86			Mean of column B	12.5
	Difference between means (B - A) ± SEM	14.91 ± 4.658			Difference between means (B - A) ± SEM	9.624 ± 3.025			Difference between means (B - A) ± SEM	-11.17 ± 2.797
	95% confidence interval	5.444 to 24.38			95% confidence interval	3.477 to 15.77			95% confidence interval	-16.85 to -5.486
	R squared (eta squared)	0.2316			R squared (eta squared)	0.2295			R squared (eta squared)	0.3193
	F test to compare variances				F test to compare variances				F test to compare variances
	F, DFn, Dfd	10.09, 17, 17			F, DFn, Dfd	3.691, 17, 17			F, DFn, Dfd	1.931, 17, 17
	P value	<0.0001			P value	0.0102			P value	0.1852
	P value summary	****			P value summary	*			P value summary	ns
	Significantly different (P < 0.05)?	Yes			Significantly different (P < 0.05)?	Yes			Significantly different (P < 0.05)?	No
	Data analyzed				Data analyzed				Data analyzed
	Sample size, column A	18			Sample size, column A	18			Sample size, column A	18
	Sample size, column B	18			Sample size, column B	18			Sample size, column B	18
