# Supplementary material for: Exploring differential gene expression and biomarker potential in systemic lupus erythematosus: a retrospective study
Source: PeerJ. 2025 Sep 8;13:e19891. doi: 10.7717/peerj.19891 (PMC12424612; doi:10.7717/peerj.19891)
Supplement: Supplemental Information 4 — A set of internationally recognized standardized guidelines that aims to standardize the design, execution and reporting of real-time quantitative PCR (qPCR) experiments and ensure the reliability, transparency and reproducibility of experimental data. [file peerj-13-19891-s004.xls]

## Sheet: Sheet1
ITEM TO CHECK	IMPORTANCE	CHECKLIST
EXPERIMENTAL DESIGN
Definition of experimental and control groups	E	On page 7, lines 141-142 in the manuscript file.
Number within each group	E	On page 7, lines 141-142 in the manuscript file.
Assay carried out by core lab or investigator's lab?	D
Acknowledgement of authors' contributions	D	On page 19, lines 469-475 in the manuscript file.
SAMPLE
Description	E	On page 7, lines 141-148 in the manuscript file
Volume/mass of sample processed	D	On page 7, lines 148-149 in the manuscript file
Microdissection or macrodissection	E	Not applicable.
Processing procedure	E	On page 10, lines 211-231 in the manuscript file.
If frozen - how and how quickly?	E	Not applicable.
If fixed - with what, how quickly?	E	Not applicable.
Sample storage conditions and duration (especially for FFPE samples)	E	Blood samples were stored in a refrigerator at 4 ℃ and RNA was extracted immediately.
NUCLEIC ACID EXTRACTION
Procedure and/or instrumentation	E	On page 10, lines 211-231 in the manuscript file.
Name of kit and details of any modifications	E	Not applicable.
Source of additional reagents used	D
Details of DNase or RNAse treatment	E	On page 10, lines 211-231 in the manuscript file.
Contamination assessment (DNA or RNA)	E	Not applicable.
Nucleic acid quantification	E
Instrument and method	E	On page 10, lines 211-231 in the manuscript file.
Purity (A260/A280)	D
Yield	D
RNA integrity method/instrument	E	Not applicable.
RIN/RQI or Cq of 3' and 5' transcripts	E	All Cq data are in "20241212 qPCR and 20241222 qPCR" files
Electrophoresis traces	D
Inhibition testing (Cq dilutions, spike or other)	E	All data are in "20241212 qPCR and 20241222 qPCR" files
REVERSE TRANSCRIPTION
Complete reaction conditions	E	On page 10, lines 219-229 in the manuscript file.
Amount of RNA and reaction volume	E	On page 10, lines 218-224 in the manuscript file.
Priming oligonucleotide (if using GSP) and concentration	E	Not applicable.
Reverse transcriptase and concentration	E	On page 10, lines 211-231 in the manuscript file.
Temperature and time	E	On page 10, lines 211-231 in the manuscript file.
Manufacturer of reagents and catalogue numbers	D	On page 10, lines 211-231 in the manuscript file.
Cqs with and without RT	D*
Storage conditions of cDNA	D
qPCR TARGET INFORMATION
If multiplex, efficiency and LOD of each assay.	E	Not applicable.
Sequence accession number	E	Supplementary Table 2
Location of amplicon	D
Amplicon length	E	Supplementary Table 2
In silico specificity screen (BLAST, etc)	E	Not applicable.
Pseudogenes, retropseudogenes or other homologs?	D
Sequence alignment	D
Secondary structure analysis of amplicon	D
Location of each primer by exon or intron (if applicable)	E	Not applicable.
What splice variants are targeted?	E	Not applicable.
qPCR OLIGONUCLEOTIDES
Primer sequences	E	Supplementary table 1
RTPrimerDB Identification Number	D
Probe sequences	D**
Location and identity of any modifications	E	Not applicable.
Manufacturer of oligonucleotides	D
Purification method	D
qPCR PROTOCOL
Complete reaction conditions	E	On page 10, lines 211-231 in the manuscript file.
Reaction volume and amount of cDNA/DNA	E	On page 10, lines 211-231 in the manuscript file.
Primer, (probe), Mg++ and dNTP concentrations	E	On page 10, lines 211-231 in the manuscript file.
Polymerase identity and concentration	E	On page 10, lines 211-231 in the manuscript file.
Buffer/kit identity and manufacturer	E	On page 10, lines 211-231 in the manuscript file.
Exact chemical constitution of the buffer	D
Additives (SYBR Green I, DMSO, etc.)	E	On page 10, lines 211-231 in the manuscript file.
Manufacturer of plates/tubes and catalog number	D
Complete thermocycling parameters	E	On page 10, lines 211-231 in the manuscript file.
Reaction setup (manual/robotic)	D
Manufacturer of qPCR instrument	E	On page 10, lines 211-231 in the manuscript file.
qPCR VALIDATION
Evidence of optimisation (from gradients)	D
Specificity (gel, sequence, melt, or digest)	E	All data are in "20241212 qPCR and 20241222 qPCR" files
For SYBR Green I, Cq of the NTC	E	All data are in "20241212 qPCR and 20241222 qPCR" files
Standard curves with slope and y-intercept	E	Not applicable.
PCR efficiency calculated from slope	E	Not applicable.
Confidence interval for PCR efficiency or standard error	D
r2 of standard curve	E	Not applicable.
Linear dynamic range	E	Not applicable.
Cq variation at lower limit	E	Not applicable.
Confidence intervals throughout range	D
Evidence for limit of detection	E	Not applicable.
If multiplex, efficiency and LOD of each assay.	E	Not applicable.
DATA ANALYSIS
qPCR analysis program (source, version)	E	On page 10, lines 211-231 in the manuscript file.
Cq method determination	E	On page 10, lines 211-231 in the manuscript file.
Outlier identification and disposition	E	Identify abnormalities by analyzing amplification curves (such as no amplification, nonspecific amplification, or Ct value difference > 0.5), melting curves (multiple peaks or Tm shift), and standard curves (poor linearity or abnormal efficiency). When handling, it is necessary to check operational errors (such as sample addition accuracy), optimize reaction conditions (adjust annealing temperatu…
Results of NTCs	E	Not applicable.
Justification of number and choice of reference genes	E	GAPDH was selected as the internal reference gene. GAPDH is involved in the glycolysis pathway and is present in almost all cells and tissues, making it easy to use it uniformly when designing experiments. GAPDH is widely used, and a large amount of data in the literature is based on GAPDH, which makes it easy to compare results.
Description of normalisation method	E	On page 10, lines 211-231 in the manuscript file.
Number and concordance of biological replicates	D
Number and stage (RT or qPCR) of technical replicates	E	The experiment was repeated twice.
Repeatability (intra-assay variation)	E	Each sample was repeated three times
Reproducibility (inter-assay variation, %CV)	D
Power analysis	D
Statistical methods for result significance	E	Mann-Whitney test
Software (source, version)	E	Roche cobas 4800 PCR machine
Cq or raw data submission using RDML	D
Table 1. MIQE checklist for authors, reviewers and editors. All essential information (E) must be submitted with the manuscript. Desirable
information (D) should be submitted if available. If using primers obtained from RTPrimerDB, information on qPCR target, oligonucleotides,
protocols and validation is available from that source.
*: Assessing the absence of DNA using a no RT assay is essential when first extracting RNA. Once the sample has been validated as
RDNA-free, inclusion of a no-RT control is desirable, but no longer essential.
**: Disclosure of the probe sequence is highly desirable and strongly encouraged. However, since not all commercial pre-designed assay
vendors provide this information, it cannot be an essential requirement. Use of such assays is advised against.
