# Supplementary material for: Exploring differential gene expression and biomarker potential in systemic lupus erythematosus: a retrospective study
Source: PeerJ. 2025 Sep 8;13:e19891. doi: 10.7717/peerj.19891 (PMC12424612; doi:10.7717/peerj.19891)
Supplement: Supplemental Information 5 — Supplemental Table 1: Primer Sequences. Lists the primer sequences used for gene expression analysis, including GAPDH, FCER1A, and RGS1. Supplemental Table 2: Top 20 up-regulated and down-regulated genes in GSE13887 dataset. Presents the top 20 genes with the most significant up-regulation and down-regulation in the GSE13887 dataset, including their log2 fold change and p-values. Supplemental Table 3: Top 20 up-regulated and down-regulated genes in GSE10325 dataset. Lists the top 20 genes with the most significant up-regulation and down-regulation in the GSE10325 dataset, including their log2 fold change and p-values. Supplemental Table 4: Top 5 GO terms of each category for DEGs between Control and SLE. Summarizes the top 5 Gene Ontology (GO) terms for Biological Processes (BP), Cellular Components (CC), and Molecular Functions (MF) enriched in differentially expressed genes (DEGs) between control and SLE samples. Supplemental Table 5: Top 5 KEGG pathways for DEGs between Control and SLE. Highlights the top 5 KEGG pathways significantly enriched in DEGs between control and SLE samples, including the associated genes and p-values. [file peerj-13-19891-s005.docx]

**Exploring differential gene expression and biomarker potential in systemic lupus erythematosus**

**Supplementary Table**

Jie Xiao#1, Yuhong Luo#1, Lina Duan#1, Xinru Mao1, Lingyue Jin1, Haifang Wang1, Hongxia Wang1, Jie Pan1, Ying Gong*1，2 and Haixia Li*1

#Jie Xiao, Yuhong Luo and Lina Duan contributed equally to this work.

1Department of Laboratory Medicine, Guangdong Provincial Key Laboratory of Precision Medical Diagnostics, Guangdong Engineering and Technology Research Center for Rapid Diagnostic Biosensors, Guangdong Provincial Key Laboratory of Single-cell and Extracellular Vesicles, Nanfang Hospital, Southern Medical University, Guangzhou, 510515, P. R. China.

2 Department of Internal Medicine, Division of Hematology, Maastricht University Medical Center+, Maastricht, the Netherlands

Supplementary Table 1

Primer Sequences.

| Primer Name | Sequence（5’-3’） |
| --- | --- |
| *GAPDH* -FOR | CTCATGACCACAGTCCATGC |
| *GAPDH* -REV | TTCAGCTCTGGGATGACCTT |
| *FCER1A*-FOR | GTTCTTCGCTCCAGATGGC |
| *FCER1A*-REV | TTGTGGAACCATTTGGTGGAA |
| *RGS1*-FOR | GGCGCAGTCTTTTGACAAGC |
| *RGS1*-REV | GCCTTCTCGTCTACCACATGC |

Supplementary Table 2

Primer information.

| Primer Name | NCBI GeneID | GenBank Accession | Amplicon Size | Coding DNA Length | PrimerBank ID |
| --- | --- | --- | --- | --- | --- |
| *GAPDH* | 26330 | NM_014364 | 116 | 1227 | 126273608c1 |
| *FCER1A* | 2205 | NM_002001 | 153 | 774 | 345110626c1 |
| *RGS1* | 10287 | NM_001039467 | 156 | 654 | 86990434c1 |

Supplementary Table 3

Top 20 up-regulated and down-regulated genes in GSE13887 dataset.

| Gene Name | log2FoldChange | *p* value | up/down |
| --- | --- | --- | --- |
| *IL2* | -4.063767902 | 0.005857468 | down |
| *BYSL* | -3.357875717 | 8.96229E-06 | down |
| *ZBED2* | -3.144103067 | 0.036797758 | down |
| *LIF* | -3.018968341 | 0.005764205 | down |
| *PPP1R14B* | -2.99425037 | 7.71937E-05 | down |
| *UBE2M* | -2.807668685 | 0.001988916 | down |
| *SAC3D1* | -2.69791599 | 0.001299184 | down |
| *CXCL9* | -2.644775912 | 0.001798584 | down |
| *TSLP* | -2.608611634 | 1.61409E-06 | down |
| *IDO1* | -2.594791865 | 0.006870362 | down |
| *CCT5* | -2.592931433 | 0.000242426 | down |
| *WDR46* | -2.581595316 | 0.00011254 | down |
| *CCL22* | -2.476532666 | 0.024689265 | down |
| *UBE2T* | -2.440496957 | 0.004631799 | down |
| *INSM1* | -2.429210316 | 0.000889907 | down |
| *PARS2* | -2.38526852 | 0.000287159 | down |
| *PSAT1* | -2.350408767 | 0.000489685 | down |
| *PRG2* | -2.347699664 | 0.000595307 | down |
| *E2F5* | -2.341956189 | 0.000209071 | down |
| *NME1* | -2.314321723 | 0.001034307 | down |
| *NR4A2* | 3.66213329 | 0.000487272 | up |
| *FOSB* | 3.597704012 | 0.002972483 | up |
| *AF090939* | 3.273778096 | 0.000918876 | up |
| *PDCD4* | 3.120056464 | 0.001615251 | up |
| *F13A1* | 3.094931236 | 0.001381321 | up |
| *RAP1GAP2* | 3.06263928 | 0.00150205 | up |
| *RP11-489E7.4* | 3.050983773 | 0.000398261 | up |
| *ZNF331* | 3.021306058 | 0.000100692 | up |
| *TUBB1* | 2.867362624 | 0.005167409 | up |
| *LTF* | 2.816928304 | 0.005932442 | up |
| *LYPD3* | 2.707228419 | 0.000629832 | up |
| *ELOVL7* | 2.675263489 | 0.002927889 | up |
| *SDPR* | 2.623463755 | 0.005129112 | up |
| *YPEL5* | 2.580862388 | 6.72331E-05 | up |
| *FOS* | 2.566928502 | 0.006500405 | up |
| *PPBP* | 2.520522454 | 0.032194012 | up |
| *TRBV27* | 2.504911481 | 0.000966496 | up |
| *SIK1* | 2.502213638 | 0.000997844 | up |
| *HIST1H2AE* | 2.498407726 | 0.000251669 | up |
| *SPARC* | 2.447629371 | 0.002574334 | up |

Supplementary Table 4

Top 20 up-regulated and down-regulated genes in GSE10325 dataset.

| Name | log2FoldChange | *p* value | up/down |
| --- | --- | --- | --- |
| *PDGFRL* | -1.381863126 | 0.000205857 | down |
| *SYT17* | -1.3686922 | 0.00753647 | down |
| *PDZRN3* | -1.299061412 | 0.000869868 | down |
| *FCER1A* | -1.219140076 | 0.019927457 | down |
| *CRIP2* | -1.189430385 | 0.00796272 | down |
| *MIA* | -1.163218058 | 0.001000502 | down |
| *FOLR2* | -1.13492973 | 0.000979543 | down |
| *AGBL3* | -1.109523138 | 0.00113102 | down |
| *DPEP2* | -1.041799711 | 0.000858317 | down |
| *ZNF135* | -1.039503688 | 0.025100911 | down |
| *ZNF259P1* | -1.017159146 | 9.88879E-05 | down |
| *LAG3* | 1.028060622 | 0.016326122 | down |
| *RRM2* | 1.038622147 | 0.024927787 | down |
| *BIK* | 1.05984963 | 0.028529767 | down |
| *GADD45G* | 1.082690906 | 0.005532708 | down |
| *GZMB* | 1.08718234 | 0.00659748 | down |
| *PLSCR1* | 1.118171391 | 0.00054867 | down |
| *CXCL13* | 1.133791213 | 0.0057886 | down |
| *HERC6* | 1.145573801 | 0.000211816 | down |
| *APOL1* | 1.174226414 | 3.8269E-05 | down |
| *IFI44L* | 2.722909089 | 2.90651E-07 | up |
| *USP18* | 2.638155669 | 3.81672E-07 | up |
| *IFI27* | 2.50165831 | 4.15494E-06 | up |
| *HLA-DQA1* | 2.262146974 | 0.009544552 | up |
| *LAMP3* | 2.21281218 | 3.53006E-05 | up |
| *ISG15* | 1.994958347 | 9.44216E-09 | up |
| *RSAD2* | 1.879960529 | 4.35968E-07 | up |
| *HBB* | 1.842780238 | 0.000475755 | up |
| *RGS1* | 1.80690388 | 0.001397664 | up |
| *IFI44* | 1.785570684 | 8.05093E-07 | up |
| *IFIT1* | 1.775749133 | 0.001388335 | up |
| *SPATS2L* | 1.747368674 | 2.46045E-05 | up |
| *MX1* | 1.49254697 | 1.72007E-06 | up |
| *HERC5* | 1.43660638 | 1.37902E-07 | up |
| *IFI6* | 1.376758362 | 4.01309E-05 | up |
| *IFIT3* | 1.370831786 | 0.000106046 | up |
| *PIR* | 1.324702351 | 3.34406E-05 | up |
| *MCM10* | 1.308767459 | 0.005448905 | up |
| *DDX60* | 1.291554948 | 3.25203E-06 | up |
| *GZMH* | 1.273411732 | 0.045793582 | up |

Supplementary Table 5

Top 5 GO terms of each category for DEGs between Control and SLE.

| Category | Term | Genes | Count | *P* Value |
| --- | --- | --- | --- | --- |
| BP | GO:0042267~natural killer cell mediated cytotoxicity | *GZMB/LAG3* | 2 | 0.00 |
| BP | GO:0002228~natural killer cell mediated immunity | *GZMB/LAG3* | 2 | 0.00 |
| BP | GO:0001909~leukocyte mediated cytotoxicity | *GZMB/LAG3* | 2 | 0.00 |
| BP | GO:0001906~cell killing | *GZMB/LAG3* | 2 | 0.00 |
| BP | GO:0035768~endothelial cell chemotaxis to fibroblast growth factor | *CXCL13* | 1 | 0.00 |
| CC | GO:0044194~cytolytic granule | *GZMB* | 1 | 0.01 |
| CC | GO:0034361~very-low-density lipoprotein particle | *APOL1* | 1 | 0.01 |
| CC | GO:0034385~triglyceride-rich plasma lipoprotein particle | *APOL1* | 1 | 0.01 |
| CC | GO:0034364~high-density lipoprotein particle | *APOL1* | 1 | 0.01 |
| CC | GO:0034358~plasma lipoprotein particle | *APOL1* | 1 | 0.01 |
| MF | GO:0016805~dipeptidase activity | *DPEP2* | 1 | 0.01 |
| MF | GO:0045236~CXCR chemokine receptor binding | *CXCL13* | 1 | 0.01 |
| MF | GO:0017134~fibroblast growth factor binding | *CXCL13* | 1 | 0.01 |
| MF | GO:0001965~G-protein alpha-subunit binding | *RGS1* | 1 | 0.01 |
| MF | GO:0019865~immunoglobulin binding | *FCER1A* | 1 | 0.01 |

Supplementary Table 6

Top 5 KEGG pathways for DEGs between Control and SLE.

| Category | Term | Genes | Count | *P* Value |
| --- | --- | --- | --- | --- |
| KEGG_PATHWAY | hsa04210:Apoptosis | *GZMB/GADD45G* | 2 | 0.00 |
| KEGG_PATHWAY | hsa05202:Transcriptional misregulation in cancer | *GZMB/GADD45G* | 2 | 0.01 |
| KEGG_PATHWAY | hsa05310:Asthma | *FCER1A* | 1 | 0.02 |
| KEGG_PATHWAY | hsa05143:African trypanosomiasis | *APOL1* | 1 | 0.02 |
| KEGG_PATHWAY | hsa05216:Thyroid cancer | *GADD45G* | 1 | 0.02 |
