# Supplementary figures and images for: Exploring differential gene expression and biomarker potential in systemic lupus erythematosus: a retrospective study
Source: PeerJ journal article supplement (doi:10.7717/peerj.19891), 2025-09-08

SLE:14    health:8

SLE1

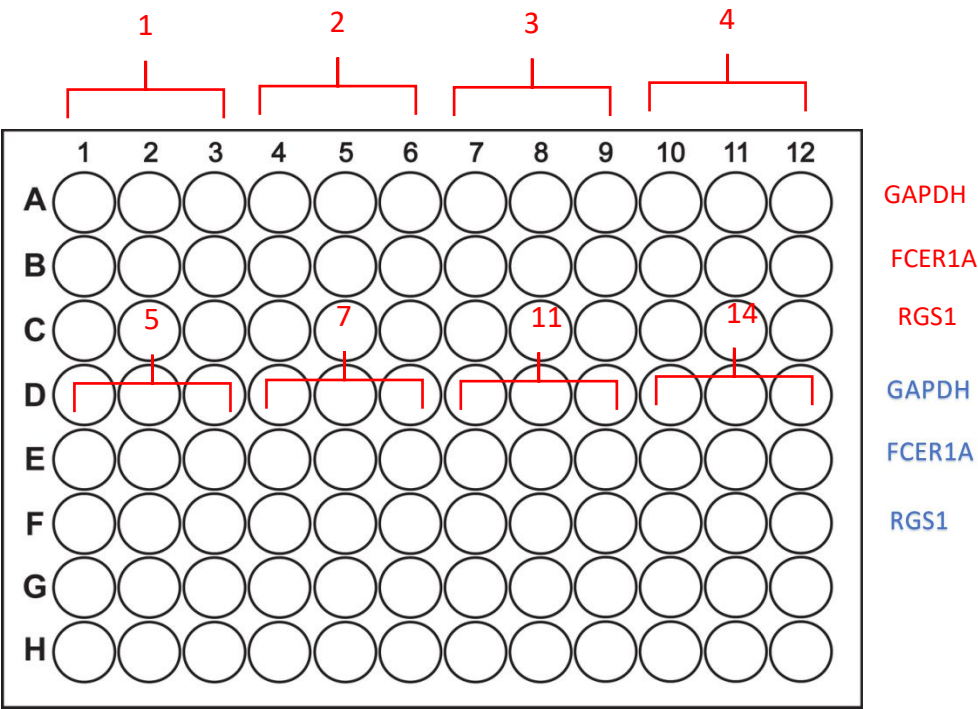

SLE2

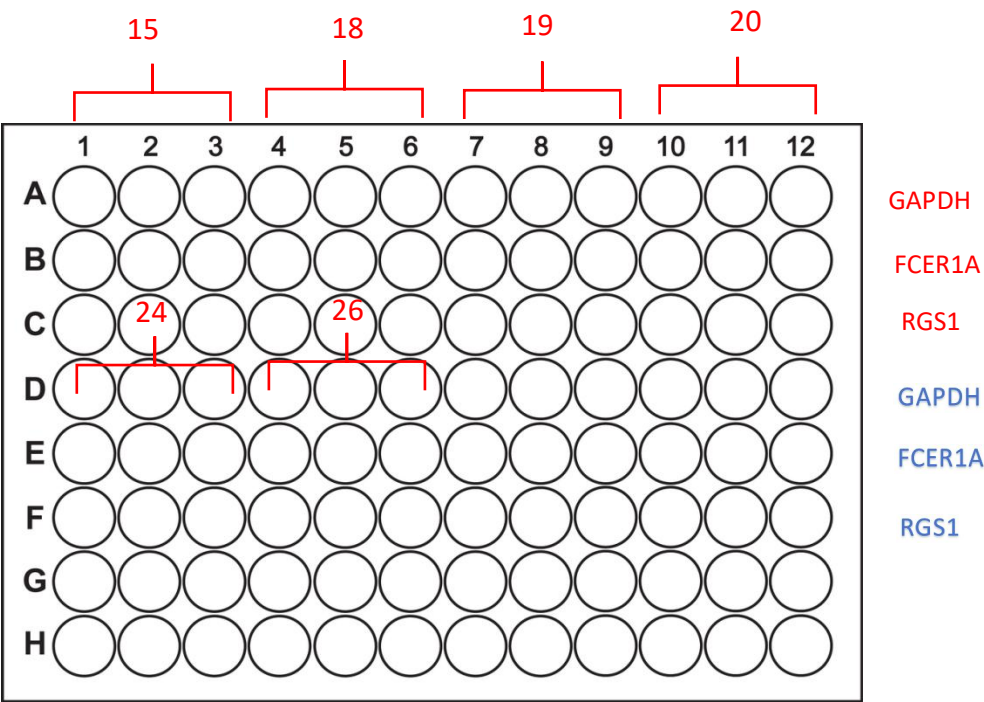

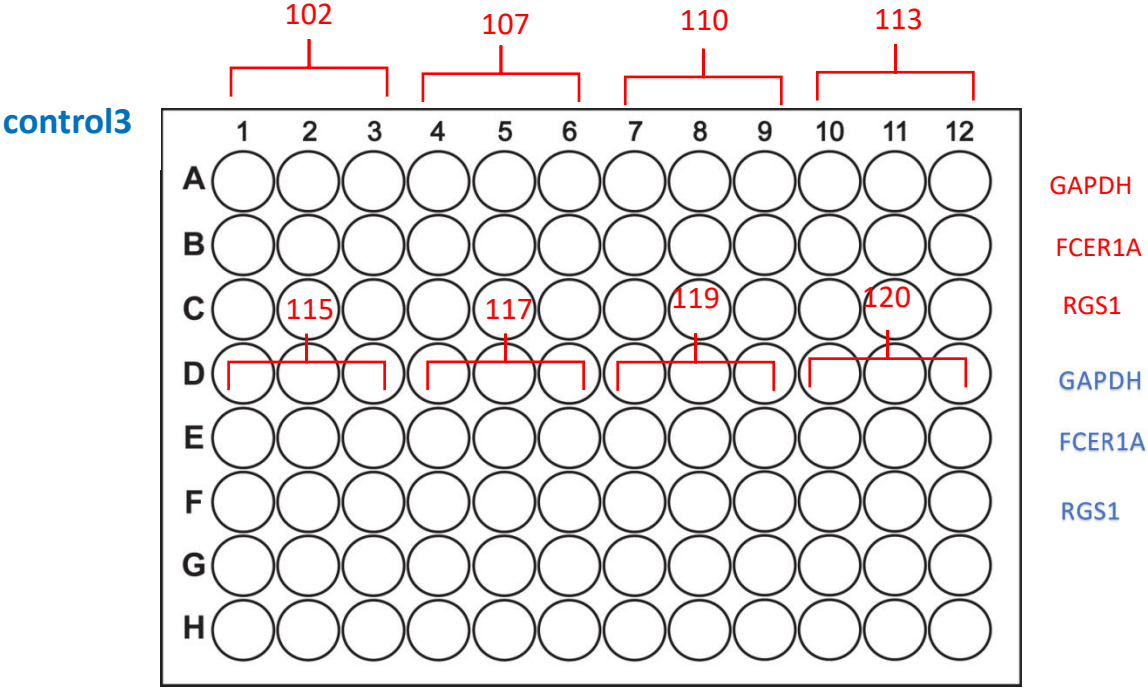

Supplement: qPCR.zip [file qPCR.zip]
